# Supplementary material
Source: PubMed Central journal article supplement (PMC2802523)
Supplement: supp_195_1_23__1.pdf [file supp_195_1_23__1.pdf]

## Members of Wellcome Trust Case Control Consortium:

**Management Committee:** Paul R Burton<sup>1</sup>, David G Clayton<sup>2</sup>, Lon R Cardon<sup>3</sup>, Nick Craddock<sup>4</sup>, Panos Deloukas<sup>5</sup>, Audrey Duncanson<sup>6</sup>, Dominic P Kwiatkowski<sup>3,5</sup>, Mark I McCarthy<sup>3,7</sup>, Willem H Ouwehand<sup>8,9</sup>, Nilesh J Samani<sup>10</sup>, John A Todd<sup>2</sup>, Peter Donnelly (Chair)<sup>11</sup>

**Data and Analysis Committee:** Jeffrey C Barrett<sup>3</sup>, Paul R Burton<sup>1</sup>, Dan Davison<sup>11</sup>, Peter Donnelly<sup>11</sup>, Doug Easton<sup>12</sup>, David M. Evans<sup>3</sup>, Hin-Tak Leung<sup>2</sup>, Jonathan L Marchini<sup>11</sup>, Andrew P Morris<sup>3</sup>, Chris CA Spencer<sup>11</sup>, Martin D Tobin<sup>1</sup>, Lon R Cardon (Co-chair)<sup>3</sup>, David G Clayton (Co-chair)<sup>2</sup>

**UK Blood Services & University of Cambridge Controls:** Antony P Attwood<sup>5,8</sup>, James P Boorman<sup>8,9</sup>, Barbara Cant<sup>8</sup>, Ursula Everson<sup>13</sup>, Judith M Hussey<sup>14</sup>, Jennifer D Jolley<sup>8</sup>, Alexandra S Knight<sup>8</sup>, Kerstin Koch<sup>8</sup>, Elizabeth Meech<sup>15</sup>, Sarah Nutland<sup>2</sup>, Christopher V Prowse<sup>16</sup>, Helen E Stevens<sup>2</sup>, Niall C Taylor<sup>8</sup>, Graham R Walters<sup>17</sup>, Neil M Walker<sup>2</sup>, Nicholas A Watkins<sup>8,9</sup>, Thilo Winzer<sup>8</sup>, John A Todd<sup>2</sup>, Willem H Ouwehand<sup>8,9</sup>

**1958 Birth Cohort Controls:** Richard W Jones<sup>18</sup>, Wendy L McArdle<sup>18</sup>, Susan M Ring<sup>18</sup>, David P Strachan<sup>19</sup>, Marcus Pembrey<sup>18,20</sup>

**Bipolar Disorder (Aberdeen):** Gerome Breen<sup>21</sup>, David St Clair<sup>21</sup>; **(Birmingham):** Sian Caesar<sup>22</sup>, Katherine Gordon-Smith<sup>22,23</sup>, Lisa Jones<sup>22</sup>; **(Cardiff):** Christine Fraser<sup>23</sup>, Elaine K Green<sup>23</sup>, Detelina Grozeva<sup>23</sup>, Marian L Hamshere<sup>23</sup>, Peter A Holmans<sup>23</sup>, Ian R Jones<sup>23</sup>, George Kirov<sup>23</sup>, Valentina Moskvina<sup>23</sup>, Ivan Nikolov<sup>23</sup>, Michael C O'Donovan<sup>23</sup>, Michael J Owen<sup>23</sup>, Nick Craddock<sup>23</sup>; **(London):** David A Collier<sup>24</sup>, Amanda Elkin<sup>24</sup>, Anne Farmer<sup>24</sup>, Richard Williamson<sup>24</sup>, Peter McGuffin<sup>24</sup>; **(Newcastle):** Allan H Young<sup>25</sup>, I Nicol Ferrier<sup>25</sup>

**Coronary Artery Disease (Leeds):** Stephen G Ball<sup>26</sup>, Anthony J Balmforth<sup>26</sup>, Jennifer H Barrett<sup>26</sup>, D Timothy Bishop<sup>26</sup>, Mark M Iles<sup>26</sup>, Azhar Maqbool<sup>26</sup>, Nadira Yuldasheva<sup>26</sup>, Alistair S Hall<sup>26</sup>; **(Leicester):** Peter S Braund<sup>10</sup>, Paul R Burton<sup>1</sup>, Richard J Dixon<sup>10</sup>, Massimo Mangino<sup>10</sup>, Suzanne Stevens<sup>10</sup>, Martin D Tobin<sup>1</sup>, John R Thompson<sup>1</sup>, Nilesh J Samani<sup>10</sup>

**Crohn's Disease (Cambridge):** Francesca Bredin<sup>27</sup>, Mark Tremelling<sup>27</sup>, Miles Parkes<sup>27</sup>; **(Edinburgh):** Hazel Drummond<sup>28</sup>, Charles W Lees<sup>28</sup>, Elaine R Nimmo<sup>28</sup>, Jack Satsangi<sup>28</sup>; **(London):** Sheila A Fisher<sup>29</sup>, Alastair Forbes<sup>30</sup>, Cathryn M Lewis<sup>29</sup>, Clive M Onnie<sup>29</sup>, Natalie J Prescott<sup>29</sup>, Jeremy Sanderson<sup>31</sup>, Christopher G Mathew<sup>29</sup>; **(Newcastle):** Jamie Barbour<sup>32</sup>, M Khalid Mohiuddin<sup>32</sup>, Catherine E Todhunter<sup>32</sup>, John C Mansfield<sup>32</sup>; **(Oxford):** Tariq Ahmad<sup>33</sup>, Fraser R Cummings<sup>33</sup>, Derek P Jewell<sup>33</sup>

**Hypertension (Aberdeen):** John Webster<sup>34</sup>; **(Cambridge):** Morris J Brown<sup>35</sup>, David G Clayton<sup>2</sup>; **(Evry, France):** G Mark Lathrop<sup>36</sup>; **(Glasgow):** John Connell<sup>37</sup>, Anna Dominiczak<sup>37</sup>; **(Leicester):** Nilesh J Samani<sup>10</sup>; **(London):** Carolina A Braga Marciano<sup>38</sup>, Beverley Burke<sup>38</sup>, Richard Dobson<sup>38</sup>, Johannie Gungadoo<sup>38</sup>, Kate L Lee<sup>38</sup>, Patricia B Munroe<sup>38</sup>, Stephen J Newhouse<sup>38</sup>, Abiodun Onipinla<sup>38</sup>, Chris Wallace<sup>38</sup>, Mingzhan Xue<sup>38</sup>, Mark Caulfield<sup>38</sup>; **(Oxford):** Martin Farrall<sup>39</sup>

**Rheumatoid Arthritis:** Anne Barton<sup>40</sup>, Ian N Bruce<sup>40</sup>, Hannah Donovan<sup>40</sup>, Steve Eyre<sup>40</sup>, Paul D Gilbert<sup>40</sup>, Samantha L Hider<sup>40</sup>, Anne M Hinks<sup>40</sup>, Sally L John<sup>40</sup>, Catherine Potter<sup>40</sup>, Alan J Silman<sup>40</sup>, Deborah PM Symmons<sup>40</sup>, Wendy Thomson<sup>40</sup>, Jane Worthington<sup>40</sup>

**Type 1 Diabetes:** David G Clayton<sup>2</sup>, David B Dunger<sup>2,41</sup>, Sarah Nutland<sup>2</sup>, Helen E Stevens<sup>2</sup>, Neil M Walker<sup>2</sup>, Barry Widmer<sup>2,41</sup>, John A Todd<sup>2</sup>

**Type 2 Diabetes (Exeter):** Timothy M Frayling<sup>42,43</sup>, Rachel M Freathy<sup>42,43</sup>, Hana Lango<sup>42,43</sup>, John R B Perry<sup>42,43</sup>, Beverley M Shields<sup>43</sup>, Michael N Weedon<sup>42,43</sup>

Andrew T Hattersley<sup>42,43</sup>; **(London)**: Graham A Hitman<sup>44</sup>; **(Newcastle)**: Mark Walker<sup>45</sup>; **(Oxford)**: Kate S Elliott<sup>3,7</sup>, Christopher J Groves<sup>7</sup>, Cecilia M Lindgren<sup>3,7</sup>, Nigel W Rayner<sup>3,7</sup>, Nicholas J Timpson<sup>3,46</sup>, Eleftheria Zeggini<sup>3,7</sup>, Mark I McCarthy<sup>3,7</sup>  
**Tuberculosis (Gambia)**: Melanie Newport<sup>47</sup>, Giorgio Sirugo<sup>47</sup>; **(Oxford)**: Emily Lyons<sup>3</sup>, Fredrik Vannberg<sup>3</sup>, Adrian VS Hill<sup>3</sup>  
**Ankylosing Spondylitis**: Linda A Bradbury<sup>48</sup>, Claire Farrar<sup>49</sup>, Jennifer J Pointon<sup>48</sup>, Paul Wordsworth<sup>49</sup>, Matthew A Brown<sup>48,49</sup>  
**Autoimmune Thyroid Disease**: Jayne A Franklyn<sup>50</sup>, Joanne M Heward<sup>50</sup>, Matthew J Simmonds<sup>50</sup>, Stephen CL Gough<sup>50</sup>  
**Breast Cancer**: Sheila Seal<sup>51</sup>, Michael R Stratton<sup>51,52</sup>, Nazneen Rahman<sup>51</sup>  
**Multiple Sclerosis**: Maria Ban<sup>53</sup>, An Goris<sup>53</sup>, Stephen J Sawcer<sup>53</sup>, Alastair Compston<sup>53</sup>  
**Gambian Controls (Gambia)**: David Conway<sup>47</sup>, Muminatou Jallow<sup>47</sup>, Melanie Newport<sup>47</sup>, Giorgio Sirugo<sup>47</sup>; **(Oxford)**: Kirk A Rockett<sup>3</sup>, Dominic P Kwiatkowski<sup>3,5</sup>  
**DNA, Genotyping, Data QC and Informatics (Wellcome Trust Sanger Institute, Hinxton)**: Suzannah J Bumpstead<sup>5</sup>, Amy Chaney<sup>5</sup>, Kate Downes<sup>2,5</sup>, Mohammed JR Ghorri<sup>5</sup>, Rhian Gwilliam<sup>5</sup>, Sarah E Hunt<sup>5</sup>, Michael Inouye<sup>5</sup>, Andrew Keniry<sup>5</sup>, Emma King<sup>5</sup>, Ralph McGinnis<sup>5</sup>, Simon Potter<sup>5</sup>, Rathi Ravindrarajah<sup>5</sup>, Pamela Whittaker<sup>5</sup>, Claire Widden<sup>5</sup>, David Withers<sup>5</sup>, Panos Deloukas<sup>5</sup>; **(Cambridge)**: Hin-Tak Leung<sup>2</sup>, Sarah Nutland<sup>2</sup>, Helen E Stevens<sup>2</sup>, Neil M Walker<sup>2</sup>, John A Todd<sup>2</sup>  
**Statistics (Cambridge)**: Doug Easton<sup>12</sup>, David G Clayton<sup>2</sup>; **(Leicester)**: Paul R Burton<sup>1</sup>, Martin D Tobin<sup>1</sup>; **(Oxford)**: Jeffrey C Barrett<sup>3</sup>, David M Evans<sup>3</sup>, Andrew P Morris<sup>3</sup>, Lon R Cardon<sup>3</sup>; **(Oxford)**: Niall J Cardin<sup>11</sup>, Dan Davison<sup>11</sup>, Teresa Ferreira<sup>11</sup>, Joanne Pereira-Gale<sup>11</sup>, Ingeleif B Hallgrimsdóttir<sup>11</sup>, Bryan N Howie<sup>11</sup>, Jonathan L Marchini<sup>11</sup>, Chris CA Spencer<sup>11</sup>, Zhan Su<sup>11</sup>, Yik Ying Teo<sup>3,11</sup>, Damjan Vukcevic<sup>11</sup>, Peter Donnelly<sup>11</sup>  
**PIs**: David Bentley<sup>5,54</sup>, Matthew A Brown<sup>48,49</sup>, Lon R Cardon<sup>3</sup>, Mark Caulfield<sup>38</sup>, David G Clayton<sup>2</sup>, Alistair Compston<sup>53</sup>, Nick Craddock<sup>23</sup>, Panos Deloukas<sup>5</sup>, Peter Donnelly<sup>11</sup>, Martin Farrall<sup>39</sup>, Stephen CL Gough<sup>50</sup>, Alistair S Hall<sup>26</sup>, Andrew T Hattersley<sup>42,43</sup>, Adrian VS Hill<sup>3</sup>, Dominic P Kwiatkowski<sup>3,5</sup>, Christopher G Mathew<sup>29</sup>, Mark I McCarthy<sup>3,7</sup>, Willem H Ouwehand<sup>8,9</sup>, Miles Parkes<sup>27</sup>, Marcus Pembrey<sup>18,20</sup>, Nazneen Rahman<sup>51</sup>, Nilesh J Samani<sup>10</sup>, Michael R Stratton<sup>51,52</sup>, John A Todd<sup>2</sup>, Jane Worthington<sup>40</sup>

<sup>1</sup> Genetic Epidemiology Group, Department of Health Sciences, University of Leicester, Adrian Building, University Road, Leicester, LE1 7RH, UK; <sup>2</sup> Juvenile Diabetes Research Foundation/Wellcome Trust Diabetes and Inflammation Laboratory, Department of Medical Genetics, Cambridge Institute for Medical Research, University of Cambridge, Wellcome Trust/MRC Building, Cambridge, CB2 0XY, UK; <sup>3</sup> Wellcome Trust Centre for Human Genetics, University of Oxford, Roosevelt Drive, Oxford OX3 7BN, UK; <sup>4</sup> Department of Psychological Medicine, Henry Wellcome Building, School of Medicine, Cardiff University, Heath Park, Cardiff CF14 4XN, UK; <sup>5</sup> The Wellcome Trust Sanger Institute, Wellcome Trust Genome Campus, Hinxton, Cambridge CB10 1SA, UK; <sup>6</sup> The Wellcome Trust, Gibbs Building, 215 Euston Road, London NW1 2BE, UK; <sup>7</sup> Oxford Centre for Diabetes, Endocrinology and Medicine, University of Oxford, Churchill Hospital, Oxford, OX3 7LJ, UK; <sup>8</sup> Department of Haematology, University of Cambridge, Long Road, Cambridge, CB2 2PT, UK; <sup>9</sup> National Health Service Blood and Transplant, Cambridge Centre, Long Road, Cambridge, CB2 2PT, UK; <sup>10</sup> Department of Cardiovascular Sciences, University of Leicester, Glenfield Hospital, Groby Road, Leicester, LE3 9QP, UK; <sup>11</sup> Department of Statistics, University of Oxford, 1 South Parks Road, Oxford OX1 3TG, UK; <sup>12</sup> Cancer Research UK Genetic Epidemiology Unit, Strangeways Research Laboratory, Worts Causeway, Cambridge CB1 8RN, UK; <sup>13</sup> National Health Service Blood and Transplant, Sheffield Centre, Longley Lane, Sheffield S5 7JN, UK; <sup>14</sup> National Health Service Blood and Transplant, Brentwood Centre, Crescent Drive, Brentwood, CM15 8DP, UK; <sup>15</sup> The Welsh Blood Service, Ely Valley Road, Talbot Green, Pontyclun, CF72 9WB, UK; <sup>16</sup> The Scottish National Blood Transfusion Service, Ellen's Glen Road, Edinburgh, EH17 7QT, UK; <sup>17</sup> National Health Service Blood and Transplant, Southampton Centre, Coxford Road, Southampton, SO16 5AF, UK; <sup>18</sup> Avon Longitudinal Study of Parents and Children, University of Bristol, 24 Tyndall Avenue, Bristol, BS8 1TQ, UK; <sup>19</sup> Division of Community Health Services, St George's University of London, Cranmer Terrace, London SW17 0RE, UK; <sup>20</sup> Institute of Child Health, University College London, 30 Guilford St, London WC1N 1EH, UK; <sup>21</sup> University of Aberdeen, Institute

of Medical Sciences, Foresterhill, Aberdeen, AB25 2ZD, UK; <sup>22</sup> Department of Psychiatry, Division of Neuroscience, Birmingham University, Birmingham, B15 2QZ, UK; <sup>23</sup> Department of Psychological Medicine, Henry Wellcome Building, School of Medicine, Cardiff University, Heath Park, Cardiff CF14 4XN, UK; <sup>24</sup> SGDP, The Institute of Psychiatry, King's College London, De Crespigny Park Denmark Hill London SE5 8AF, UK; <sup>25</sup> School of Neurology, Neurobiology and Psychiatry, Royal Victoria Infirmary, Queen Victoria Road, Newcastle upon Tyne, NE1 4LP, UK; <sup>26</sup> LIGHT and LImm Research Institutes, Faculty of Medicine and Health, University of Leeds, Leeds, LS1 3EX, UK; <sup>27</sup> IBD Research Group, Addenbrooke's Hospital, University of Cambridge, Cambridge, CB2 2QQ, UK; <sup>28</sup> Gastrointestinal Unit, School of Molecular and Clinical Medicine, University of Edinburgh, Western General Hospital, Edinburgh EH4 2XU UK; <sup>29</sup> Department of Medical & Molecular Genetics, King's College London School of Medicine, 8th Floor Guy's Tower, Guy's Hospital, London, SE1 9RT, UK; <sup>30</sup> Institute for Digestive Diseases, University College London Hospitals Trust, London, NW1 2BU, UK; <sup>31</sup> Department of Gastroenterology, Guy's and St Thomas' NHS Foundation Trust, London, SE1 7EH, UK; <sup>32</sup> Department of Gastroenterology & Hepatology, University of Newcastle upon Tyne, Royal Victoria Infirmary, Newcastle upon Tyne, NE1 4LP, UK; <sup>33</sup> Gastroenterology Unit, Radcliffe Infirmary, University of Oxford, Oxford, OX2 6HE, UK; <sup>34</sup> Medicine and Therapeutics, Aberdeen Royal Infirmary, Foresterhill, Aberdeen, Grampian AB9 2ZB, UK; <sup>35</sup> Clinical Pharmacology Unit and the Diabetes and Inflammation Laboratory, University of Cambridge, Addenbrookes Hospital, Hills Road, Cambridge CB2 2QQ, UK; <sup>36</sup> Centre National de Genotypage, 2, Rue Gaston Cremieux, Evry, Paris 91057.; <sup>37</sup> BHF Glasgow Cardiovascular Research Centre, University of Glasgow, 126 University Place, Glasgow, G12 8TA, UK; <sup>38</sup> Clinical Pharmacology and Barts and The London Genome Centre, William Harvey Research Institute, Barts and The London, Queen Mary's School of Medicine, Charterhouse Square, London EC1M 6BQ, UK; <sup>39</sup> Cardiovascular Medicine, University of Oxford, Wellcome Trust Centre for Human Genetics, Roosevelt Drive, Oxford OX3 7BN, UK; <sup>40</sup> arc Epidemiology Research Unit, University of Manchester, Stopford Building, Oxford Rd, Manchester, M13 9PT, UK; <sup>41</sup> Department of Paediatrics, University of Cambridge, Addenbrooke's Hospital, Cambridge, CB2 2QQ, UK; <sup>42</sup> Genetics of Complex Traits, Institute of Biomedical and Clinical Science, Peninsula Medical School, Magdalen Road, Exeter EX1 2LU UK; <sup>43</sup> Diabetes Genetics, Institute of Biomedical and Clinical Science, Peninsula Medical School, Barrack Road, Exeter EX2 5DU UK; <sup>44</sup> Centre for Diabetes and Metabolic Medicine, Barts and The London, Royal London Hospital, Whitechapel, London, E1 1BB UK; <sup>45</sup> Diabetes Research Group, School of Clinical Medical Sciences, Newcastle University, Framlington Place, Newcastle upon Tyne NE2 4HH, UK; <sup>46</sup> The MRC Centre for Causal Analyses in Translational Epidemiology, Bristol University, Canynge Hall, Whiteladies Rd, Bristol BS2 8PR, UK; <sup>47</sup> MRC Laboratories, Fajara, The Gambia; <sup>48</sup> Diamantina Institute for Cancer, Immunology and Metabolic Medicine, Princess Alexandra Hospital, University of Queensland, Woolloongabba, Qld 4102, Australia; <sup>49</sup> Botnar Research Centre, University of Oxford, Headington, Oxford OX3 7BN, UK; <sup>50</sup> Department of Medicine, Division of Medical Sciences, Institute of Biomedical Research, University of Birmingham, Edgbaston, Birmingham B15 2TT, UK; <sup>51</sup> Section of Cancer Genetics, Institute of Cancer Research, 15 Cotswold Road, Sutton, SM2 5NG, UK; <sup>52</sup> Cancer Genome Project, The Wellcome Trust Sanger Institute, Wellcome Trust Genome Campus, Hinxton, Cambridge CB10 1SA, UK; <sup>53</sup> Department of Clinical Neurosciences, University of Cambridge, Addenbrooke's Hospital, Hills Road, Cambridge CB2 2QQ, UK; <sup>54</sup> PRESENT ADDRESS: Illumina Cambridge, Chesterford Research Park, Little Chesterford, Nr Saffron Walden, Essex, CB10 1XL, UK.

# Cluster Plots

rs4818065

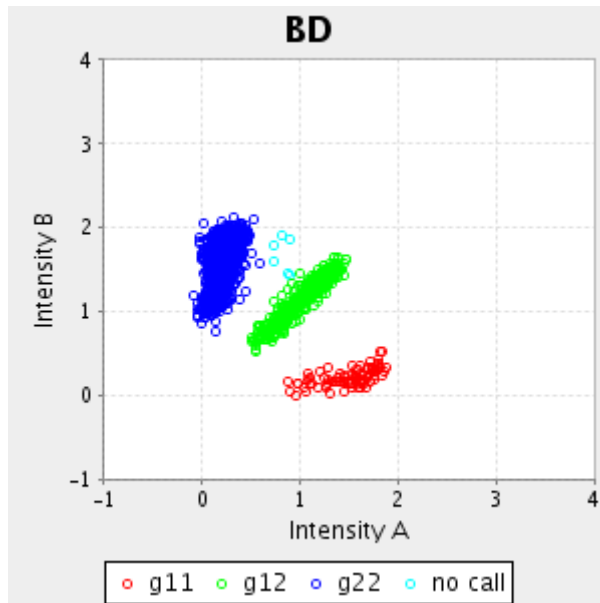

Bipolar disorder

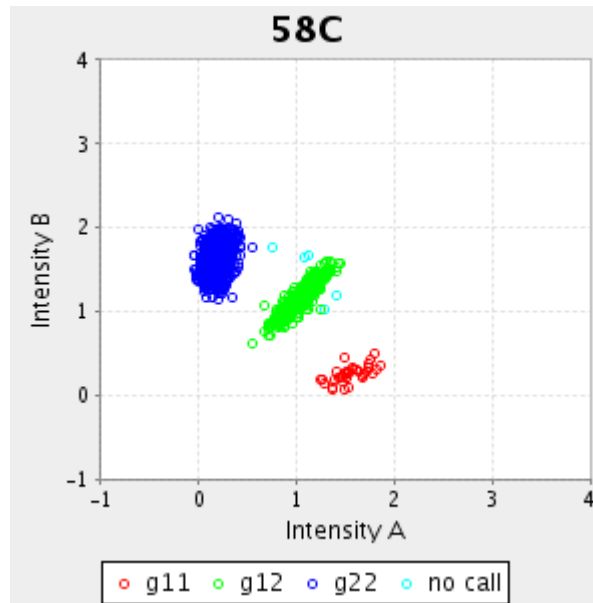

1958 birth cohort controls

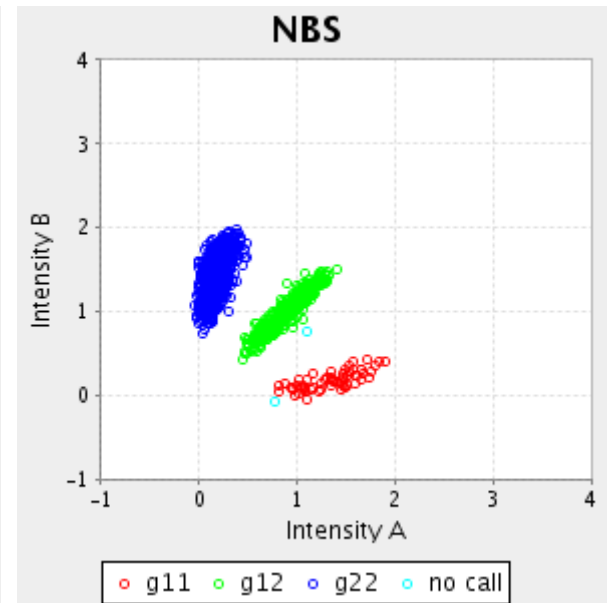

UK Blood Service controls

rs2352974

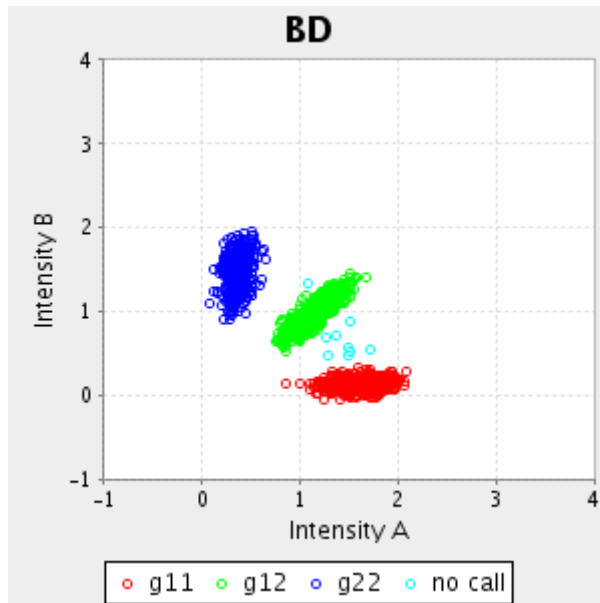

Bipolar disorder

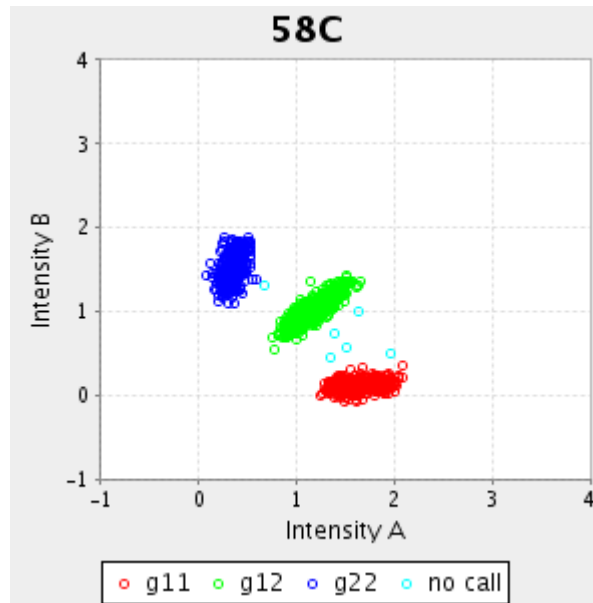

1958 birth cohort controls

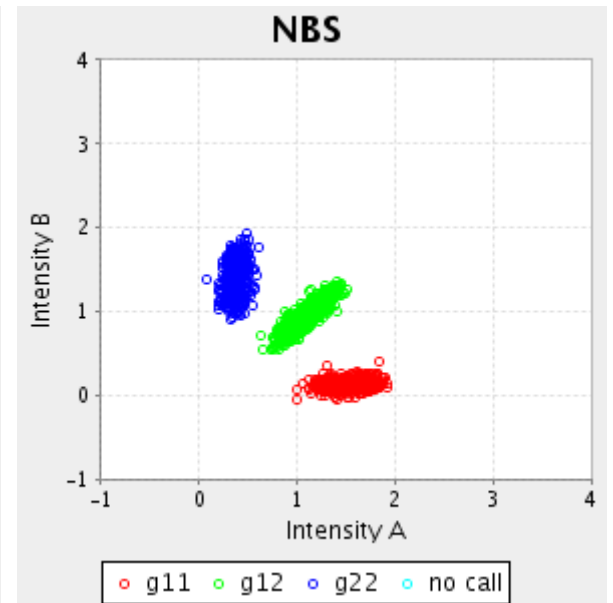

UK Blood Service controls

rs16942644

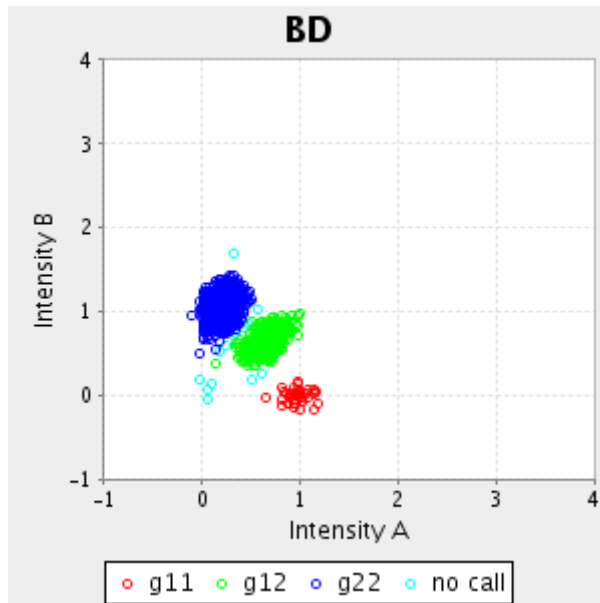

Bipolar disorder

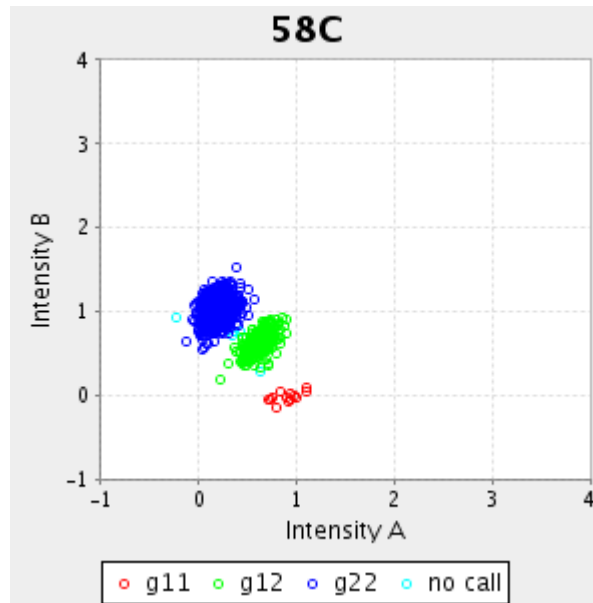

1958 birth cohort controls

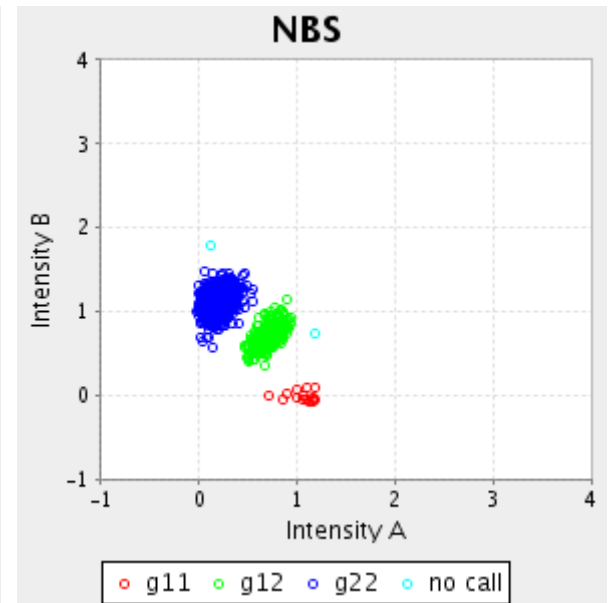

UK Blood Service controls

rs4279178

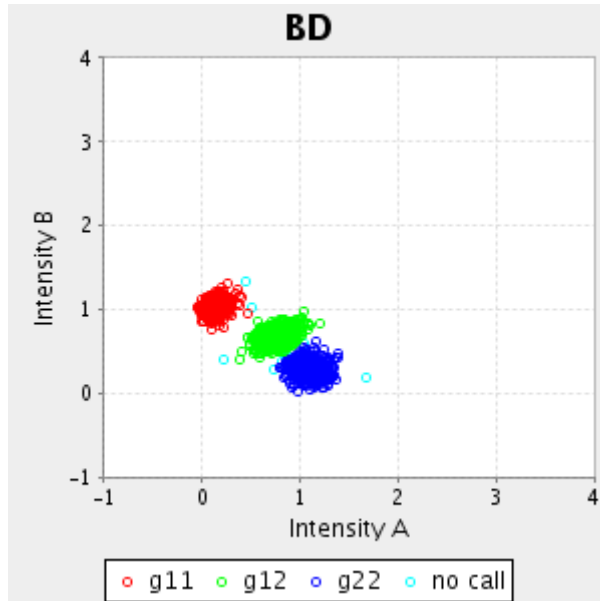

Bipolar disorder

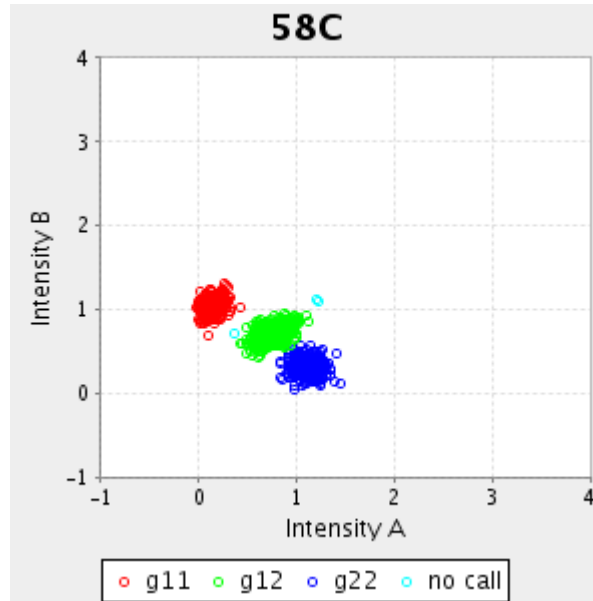

1958 birth cohort controls

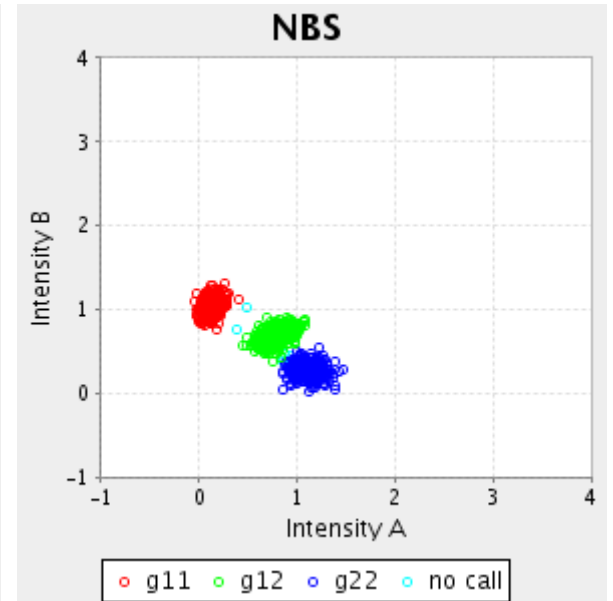

UK Blood Service controls



rs13154602

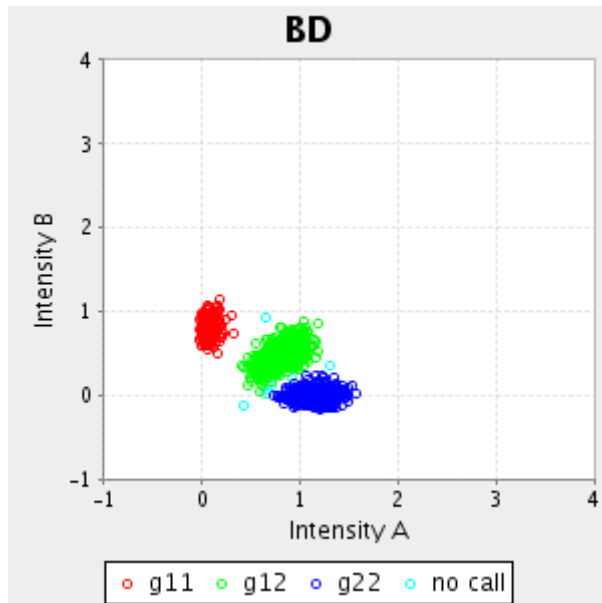

Bipolar disorder

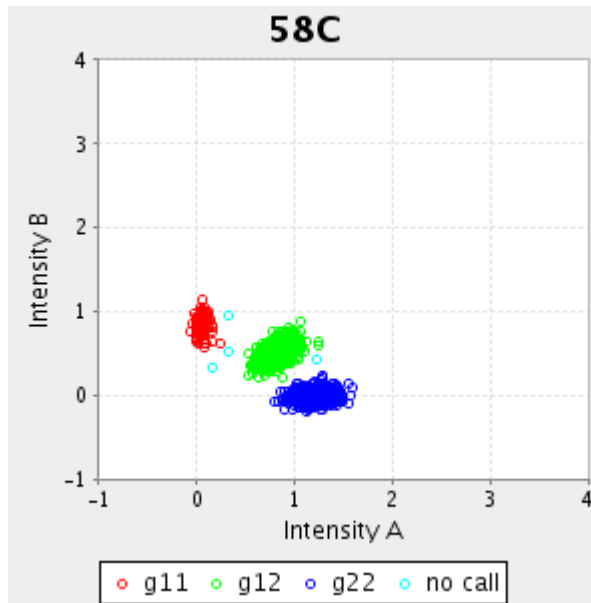

1958 birth cohort controls

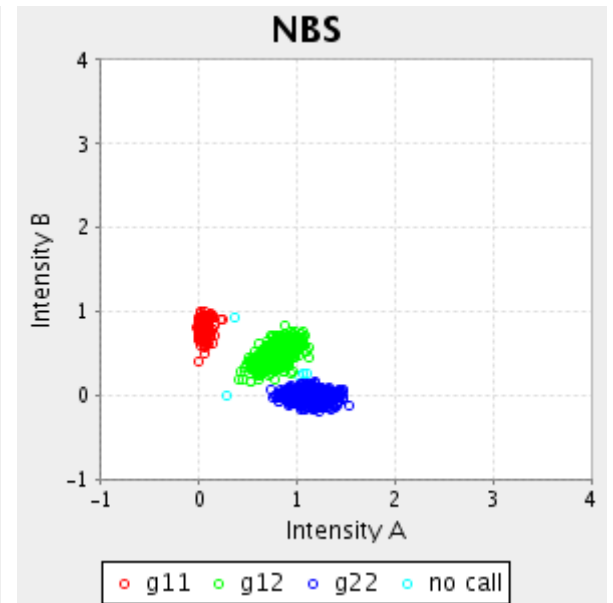

UK Blood Service controls

rs7990962

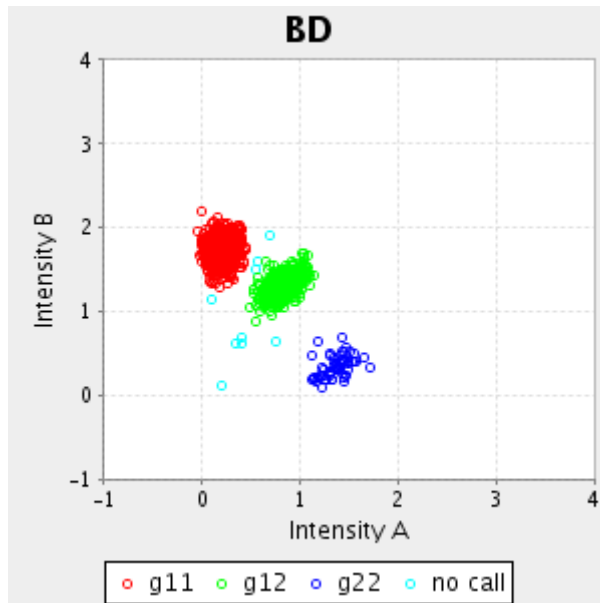

Bipolar disorder

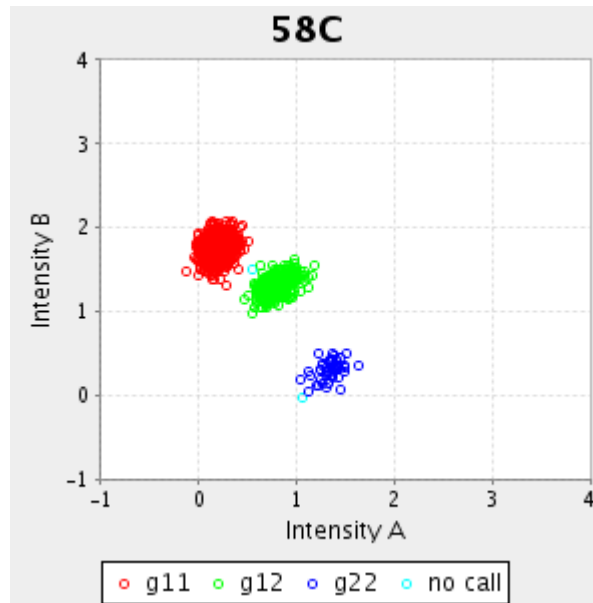

1958 birth cohort controls

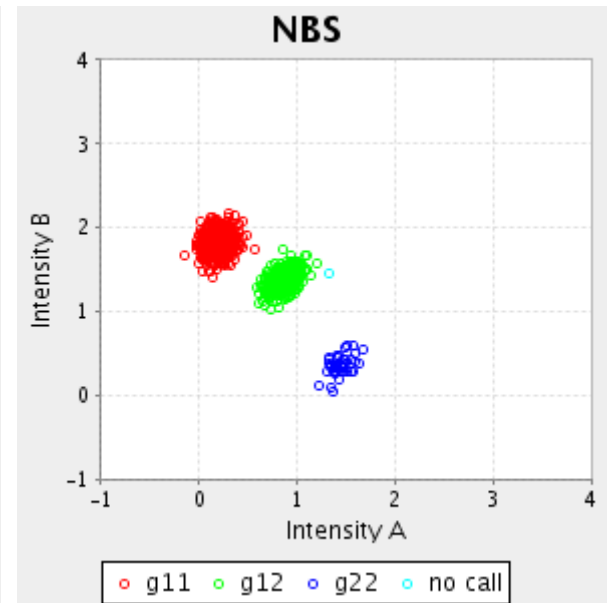

UK Blood Service controls

rs4027132

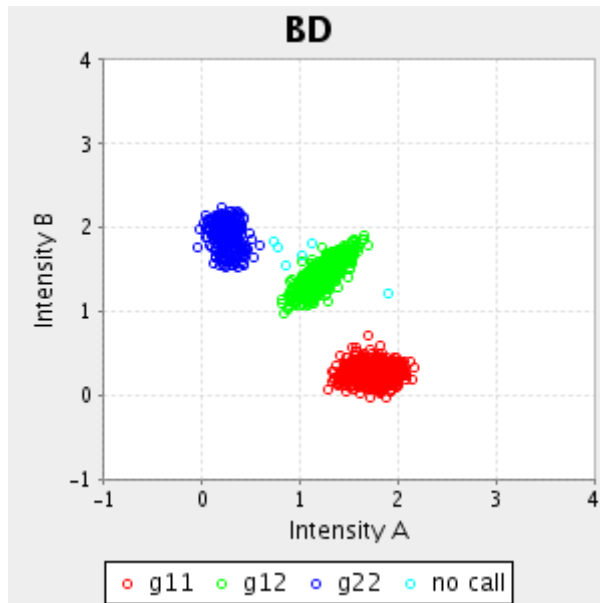

Bipolar disorder

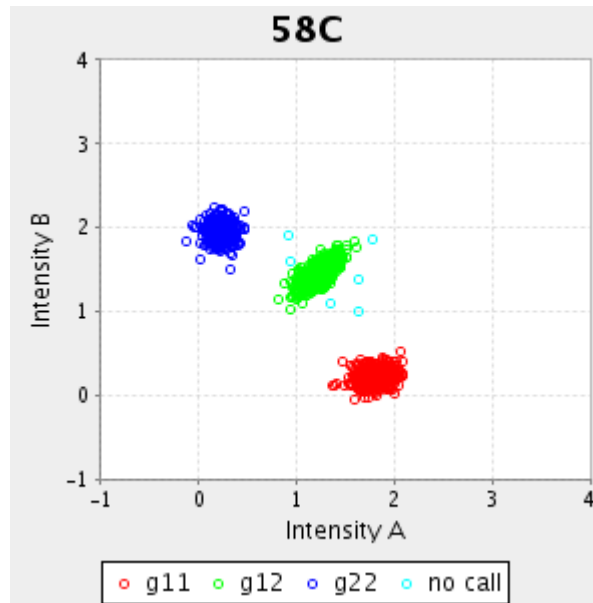

1958 birth cohort controls

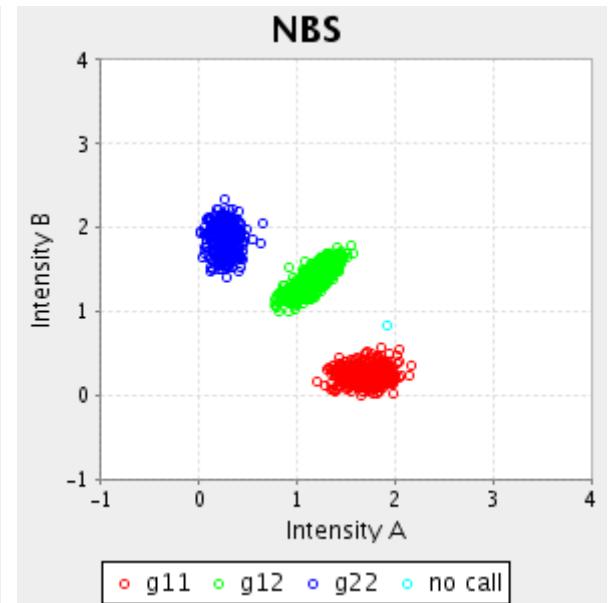

UK Blood Service controls

rs7680321

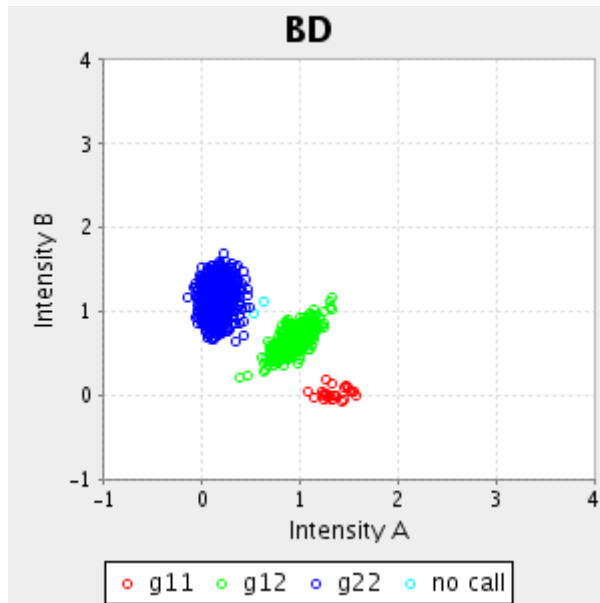

Bipolar disorder

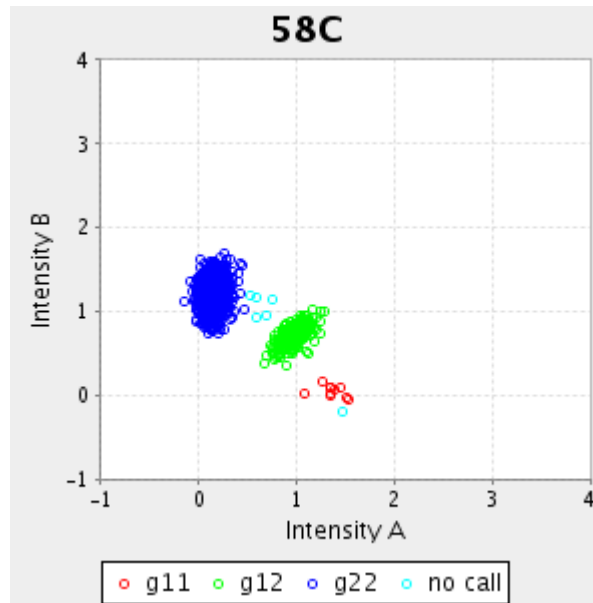

1958 birth cohort controls

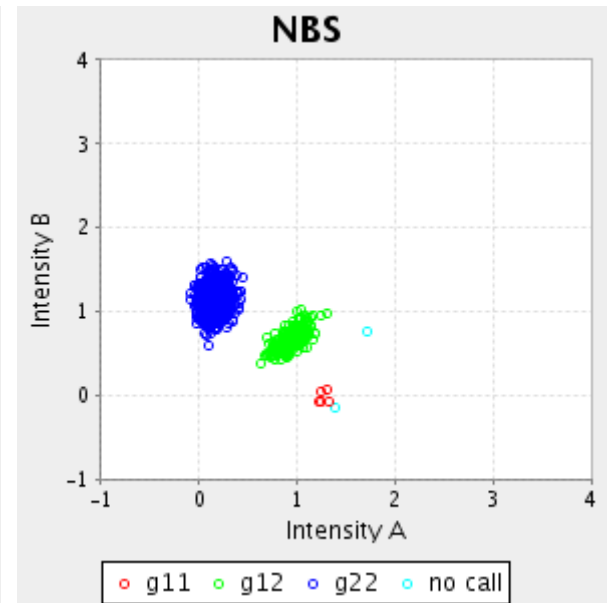

UK Blood Service controls

rs1171115

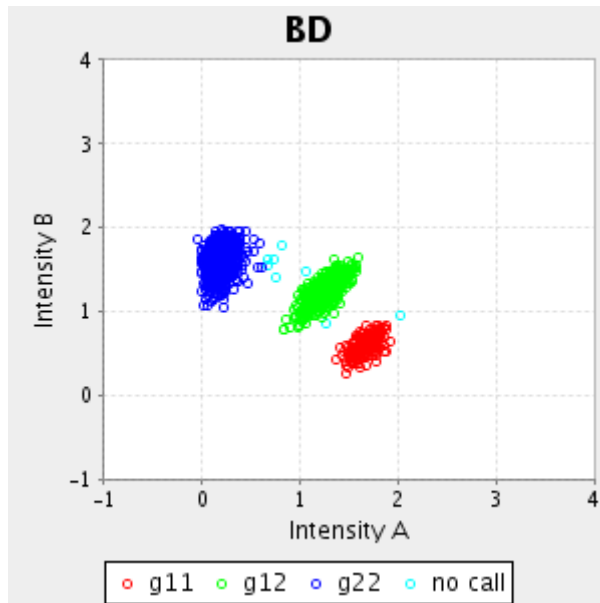

Bipolar disorder

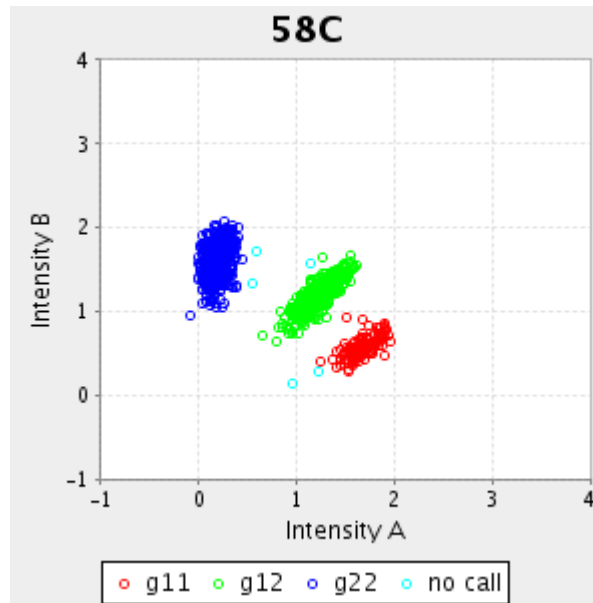

1958 birth cohort controls

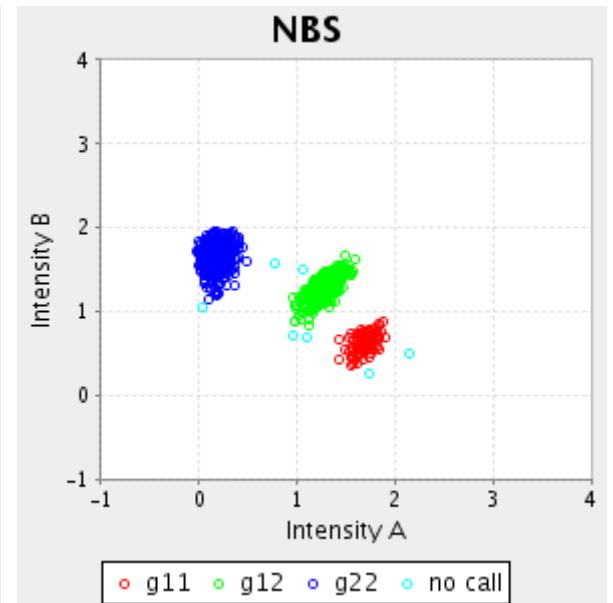

UK Blood Service controls

rs4786811

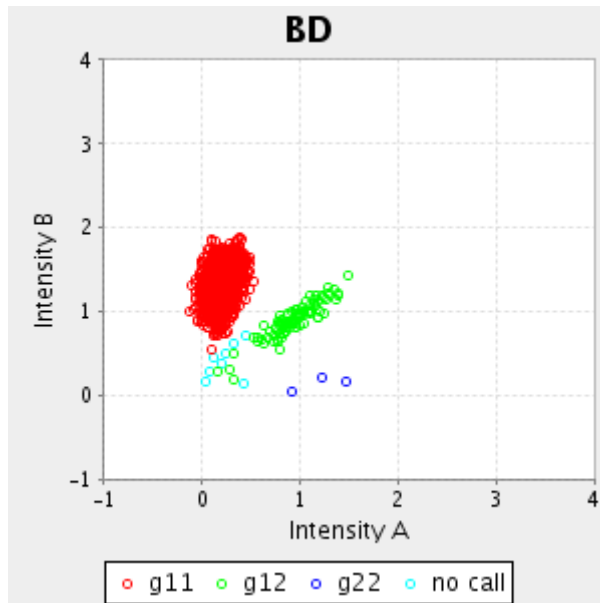

Bipolar disorder

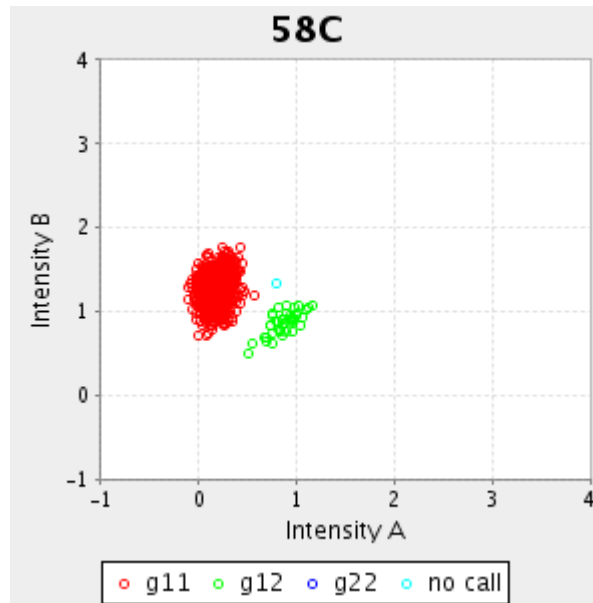

1958 birth cohort controls

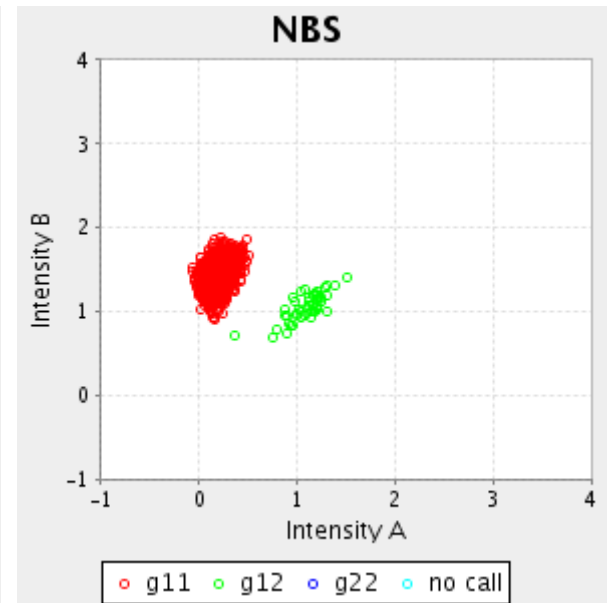

UK Blood Service controls

# Multidimensional Scaling

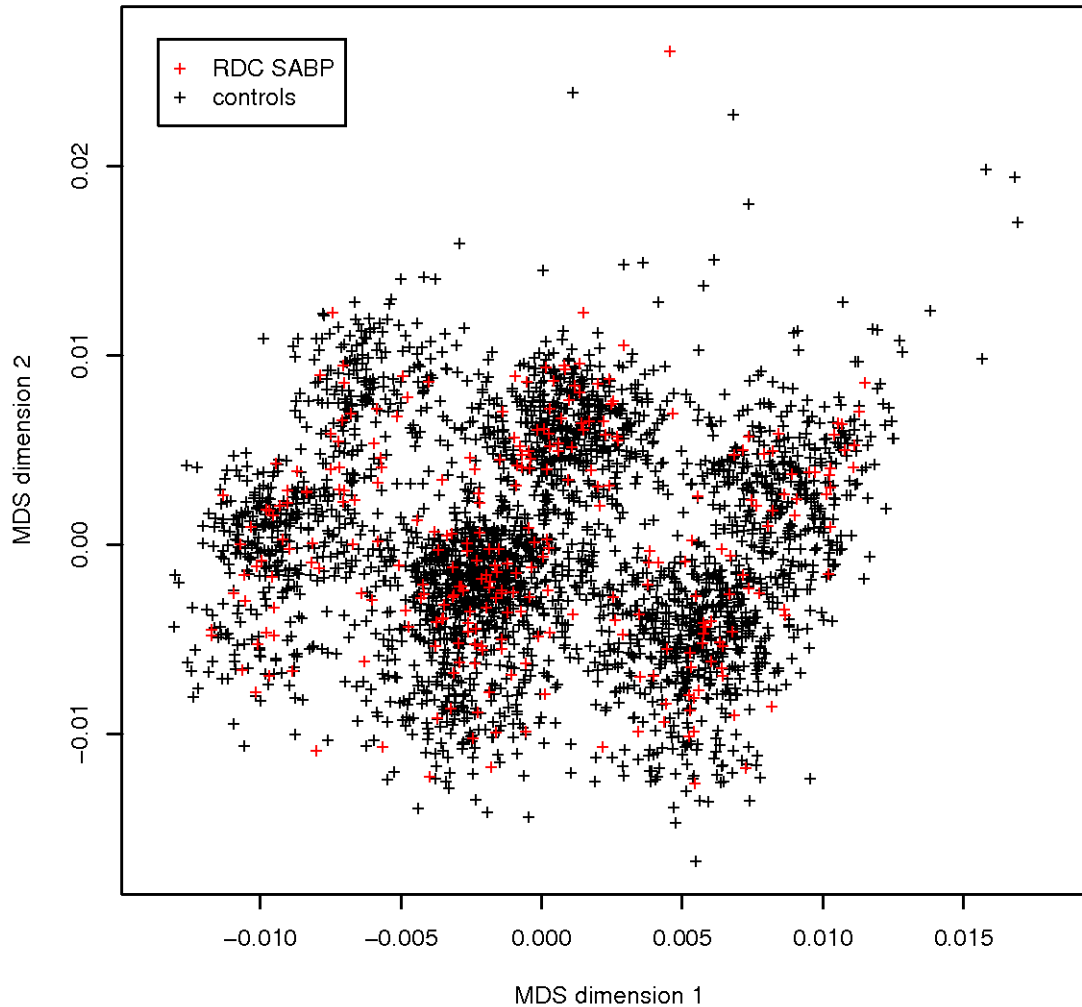

Analysis of the WTCCC data demonstrated that the BD sample is closely similar to the controls and this plot demonstrates that this holds for the subset of SABP.



QQ plot of genome-wide  
lambda-corrected association  
test statistics

Q-Q Armitage trend test

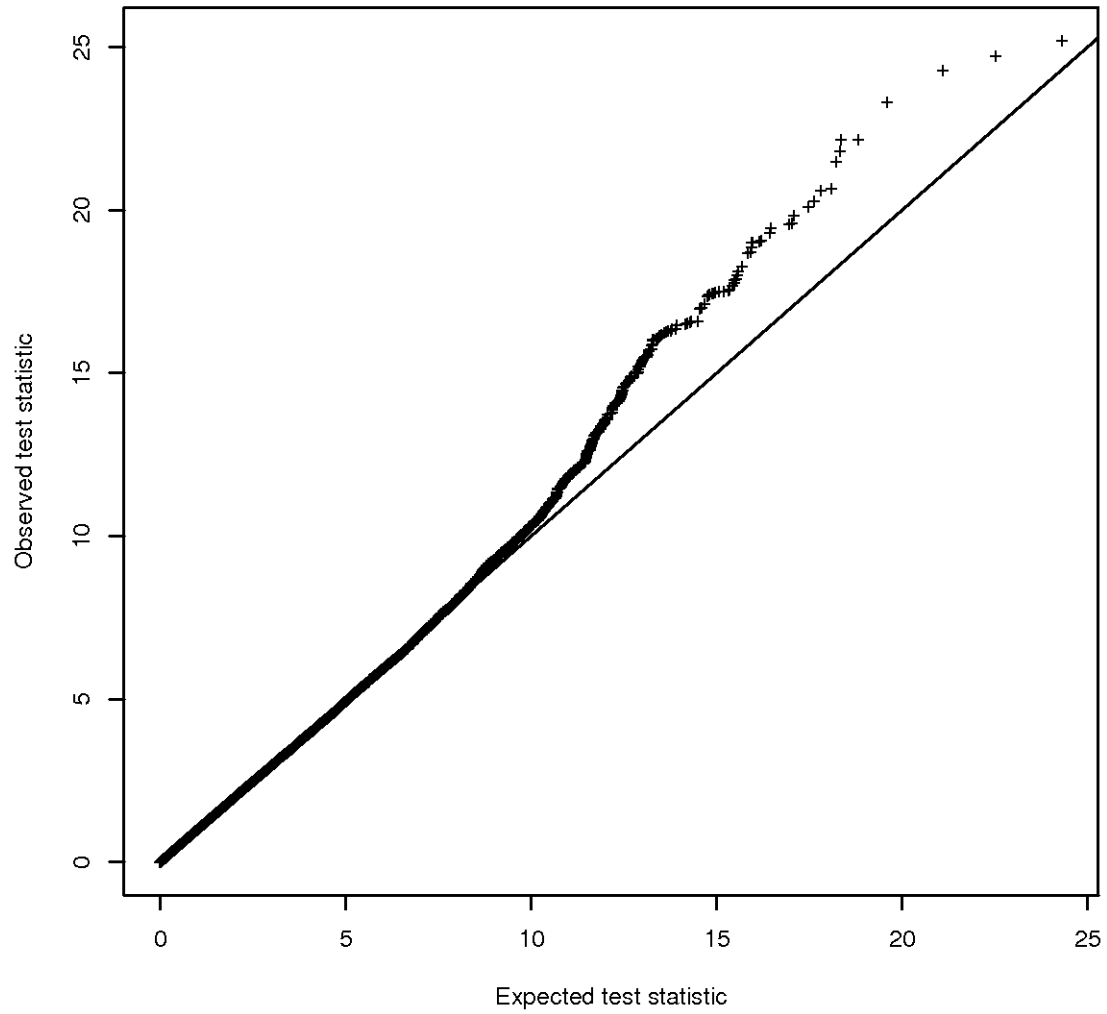

Table DS1: The joint distribution of DSM–IV and Research Diagnostic Criteria (RDC) diagnosis for the bipolar sample

|       |                                        | DSM–IV             |                     |                                        |                                          | Total |
|-------|----------------------------------------|--------------------|---------------------|----------------------------------------|------------------------------------------|-------|
|       |                                        | Bipolar disorder I | Bipolar disorder II | Schizoaffective disorder, bipolar type | Bipolar disorder not otherwise specified |       |
| RDC   | Bipolar disorder I                     | 1313               | 1                   | 0                                      | 2                                        | 1316  |
|       | Bipolar disorder II                    | 1                  | 132                 | 0                                      | 38                                       | 171   |
|       | Schizoaffective disorder, bipolar type | 179                | 0                   | 98                                     | 2                                        | 279   |
|       | Manic disorder                         | 101                | 1                   | 0                                      | 0                                        | 102   |
| Total |                                        | 1594               | 134                 | 98                                     | 42                                       | 1868  |

Table DS2: All SNPs tested for association (RDC SABP vs. controls) with the Cochran-Armitage trend test and significant at the p=0.05 threshold.

| chromosome | SNP        | MAF_cases | MAF_controls | p_value  |
|------------|------------|-----------|--------------|----------|
| 21         | rs4818065  | 0.271583  | 0.181772     | 5.12E-07 |
| 21         | rs734413   | 0.270609  | 0.181384     | 6.60E-07 |
| 3          | rs2352974  | 0.387097  | 0.499319     | 8.27E-07 |
| 15         | rs16942644 | 0.170863  | 0.102354     | 1.38E-06 |
| 3          | rs2271961  | 0.399642  | 0.506301     | 2.49E-06 |
| 4          | rs6414684  | 0.401079  | 0.509047     | 2.49E-06 |
| 5          | rs13154602 | 0.363309  | 0.269441     | 2.99E-06 |
| 15         | rs11073831 | 0.177419  | 0.109598     | 3.55E-06 |
| 5          | rs3934500  | 0.362007  | 0.270663     | 5.44E-06 |
| 13         | rs7990962  | 0.252688  | 0.173025     | 5.61E-06 |
| 2          | rs4027132  | 0.356631  | 0.459312     | 6.63E-06 |
| 4          | rs7680321  | 0.136201  | 0.0793245    | 7.28E-06 |
| 6          | rs1171115  | 0.356631  | 0.264344     | 8.36E-06 |
| 5          | rs13170206 | 0.359712  | 0.270492     | 9.60E-06 |
| 6          | rs512140   | 0.356631  | 0.265017     | 9.64E-06 |
| 6          | rs9341963  | 0.360215  | 0.268825     | 1.03E-05 |
| 6          | rs13207536 | 0.295699  | 0.211512     | 1.11E-05 |
| 4          | rs3934674  | 0.362007  | 0.272217     | 1.26E-05 |
| 7          | rs9692080  | 0.553763  | 0.453663     | 1.27E-05 |
| 6          | rs798395   | 0.354839  | 0.264806     | 1.30E-05 |
| 7          | rs971992   | 0.243728  | 0.337082     | 1.30E-05 |
| 3          | rs6795255  | 0.417563  | 0.323158     | 1.41E-05 |
| 15         | rs12595660 | 0.179211  | 0.114899     | 1.50E-05 |
| 4          | rs1442101  | 0.134892  | 0.0797274    | 1.54E-05 |
| 4          | rs6447530  | 0.206093  | 0.137849     | 1.90E-05 |
| 4          | rs4859809  | 0.305054  | 0.222582     | 2.05E-05 |
| 4          | rs17397262 | 0.303957  | 0.221995     | 2.19E-05 |
| 4          | rs12645407 | 0.304659  | 0.222771     | 2.20E-05 |
| 7          | rs2869738  | 0.561372  | 0.464554     | 2.35E-05 |
| 4          | rs960507   | 0.303957  | 0.22226      | 2.37E-05 |
| 4          | rs6447534  | 0.136201  | 0.0820539    | 2.47E-05 |
| 2          | rs6748570  | 0.145161  | 0.0883555    | 2.62E-05 |
| 4          | rs4368579  | 0.566308  | 0.470708     | 2.75E-05 |
| 7          | rs971993   | 0.250896  | 0.34111      | 2.81E-05 |
| 4          | rs2042233  | 0.302867  | 0.222147     | 2.88E-05 |
| 7          | rs971990   | 0.251799  | 0.342016     | 2.88E-05 |
| 4          | rs4859790  | 0.302867  | 0.222222     | 2.89E-05 |
| 4          | rs4859488  | 0.302867  | 0.222241     | 2.94E-05 |
| 15         | rs16961825 | 0.132616  | 0.0793867    | 2.95E-05 |
| 4          | rs4859783  | 0.302867  | 0.222317     | 2.99E-05 |
| 4          | rs10518169 | 0.301444  | 0.220895     | 3.04E-05 |
| 4          | rs752062   | 0.302867  | 0.222411     | 3.10E-05 |
| 4          | rs1862359  | 0.299283  | 0.219925     | 3.51E-05 |
| 4          | rs4859787  | 0.302158  | 0.22243      | 3.71E-05 |
| 4          | rs2194118  | 0.302158  | 0.22245      | 3.74E-05 |
| 9          | rs10982246 | 0.393885  | 0.488749     | 3.78E-05 |
| 4          | rs2059103  | 0.299283  | 0.220954     | 4.61E-05 |
| 4          | rs10012774 | 0.30036   | 0.221655     | 4.63E-05 |
| 4          | rs2059105  | 0.30036   | 0.22173      | 4.73E-05 |
| 4          | rs4859481  | 0.30036   | 0.221749     | 4.75E-05 |
| 4          | rs4697854  | 0.0913978 | 0.0497614    | 4.87E-05 |
| 7          | rs10954656 | 0.563177  | 0.469997     | 4.94E-05 |

Table DS2: All SNPs tested for association (RDC SABP vs. controls) with the Cochran-Armitage trend test and significant at the p=0.05 threshold.

| chromosome | SNP        | MAF_cases | MAF_controls | p_value     |
|------------|------------|-----------|--------------|-------------|
| 4          | rs2059102  | 0.299283  | 0.221295     | 5.22E-05    |
| 4          | rs2194126  | 0.299283  | 0.221295     | 5.22E-05    |
| 4          | rs2042231  | 0.30036   | 0.222241     | 5.22E-05    |
| 4          | rs2059104  | 0.298561  | 0.220513     | 5.25E-05    |
| 4          | rs2866045  | 0.299283  | 0.221446     | 5.41E-05    |
| 4          | rs4241616  | 0.299283  | 0.221485     | 5.43E-05    |
| 4          | rs2059106  | 0.299283  | 0.22156      | 5.52E-05    |
| 4          | rs9991953  | 0.299283  | 0.22156      | 5.60E-05    |
| 4          | rs2194117  | 0.30036   | 0.222658     | 5.74E-05    |
| 4          | rs10010146 | 0.299283  | 0.221749     | 5.83E-05    |
| 4          | rs888982   | 0.299283  | 0.221749     | 5.83E-05    |
| 4          | rs9307260  | 0.299283  | 0.221825     | 5.94E-05    |
| 4          | rs10017165 | 0.299283  | 0.221901     | 6.06E-05    |
| 3          | rs1522549  | 0.143369  | 0.219454     | 6.09E-05    |
| 4          | rs17397057 | 0.299283  | 0.22192      | 6.15E-05    |
| 2          | rs6750277  | 0.392473  | 0.30705      | 6.25E-05    |
| 22         | rs17435801 | 0.305054  | 0.226081     | 6.25E-05    |
| 4          | rs2042229  | 0.299283  | 0.221995     | 6.28E-05    |
| 12         | rs4764639  | 0.322581  | 0.411584     | 6.70E-05    |
| 18         | rs3760569  | 0.399642  | 0.315798     | 6.80E-05    |
| 2          | rs7563310  | 0.243728  | 0.173883     | 7.25E-05    |
| 4          | rs17395298 | 0.298561  | 0.221901     | 7.29E-05    |
| 4          | rs4608831  | 0.298561  | 0.221938     | 7.40E-05    |
| 4          | rs4298171  | 0.274194  | 0.201874     | 7.44E-05    |
| 4          | rs1988614  | 0.297834  | 0.221485     | 7.97E-05    |
| 9          | rs1073540  | 0.116487  | 0.0698668    | 8.26E-05    |
| 12         | rs905610   | 0.321942  | 0.409881     | 8.26E-05    |
| 6          | rs6570569  | 0.309353  | 0.231437     | 8.38E-05    |
| 4          | rs1458696  | 0.272401  | 0.200716     | 8.55E-05    |
| 12         | rs7298531  | 0.322581  | 0.410116     | 8.68E-05    |
| 3          | rs16827322 | 0.363799  | 0.283112     | 8.77E-05    |
| 4          | rs4475169  | 0.298561  | 0.222582     | 8.81E-05    |
| 13         | rs1323608  | 0.261649  | 0.190054     | 8.85E-05    |
| 2          | rs1543061  | 0.410394  | 0.325843     | 9.21E-05    |
| 2          | rs2136477  | 0.412186  | 0.327545     | 9.40E-05    |
| 2          | rs4973362  | 0.410394  | 0.325894     | 9.54E-05    |
| 4          | rs4484325  | 0.296763  | 0.221465     | 9.64E-05    |
| 2          | rs10192428 | 0.410394  | 0.326294     | 0.000101317 |
| 4          | rs10034292 | 0.296763  | 0.221901     | 0.000105447 |
| 3          | rs11130858 | 0.239209  | 0.322124     | 0.000106505 |
| 2          | rs16834204 | 0.111111  | 0.0662692    | 0.000107039 |
| 3          | rs6792682  | 0.146953  | 0.0942301    | 0.000107039 |
| 19         | rs11672818 | 0.285199  | 0.370092     | 0.000112523 |
| 10         | rs2797130  | 0.356631  | 0.277154     | 0.000114222 |
| 7          | rs3113288  | 0.327957  | 0.415104     | 0.00011537  |
| 6          | rs2501184  | 0.232014  | 0.313756     | 0.000115948 |
| 22         | rs16981741 | 0.322581  | 0.245061     | 0.000115948 |
| 7          | rs7783847  | 0.270609  | 0.354685     | 0.000120077 |
| 6          | rs2501194  | 0.232975  | 0.314354     | 0.000120678 |
| 9          | rs12554091 | 0.179211  | 0.121382     | 0.000121283 |
| 4          | rs1458692  | 0.317204  | 0.242249     | 0.000121891 |
| 7          | rs4726715  | 0.550179  | 0.462351     | 0.000124354 |

Table DS2: All SNPs tested for association (RDC SABP vs. controls) with the Cochran-Armitage trend test and significant at the p=0.05 threshold.

| chromosome | SNP        | MAF_cases | MAF_controls | p_value     |
|------------|------------|-----------|--------------|-------------|
| 1          | rs680638   | 0.182796  | 0.25818      | 0.000126233 |
| 9          | rs4961665  | 0.335125  | 0.257927     | 0.000126866 |
| 10         | rs11598789 | 0.0322581 | 0.0773952    | 0.000128141 |
| 3          | rs9858542  | 0.360215  | 0.281815     | 0.000134042 |
| 4          | rs6832008  | 0.317204  | 0.242672     | 0.00013539  |
| 12         | rs1480039  | 0.116487  | 0.0702832    | 0.00013539  |
| 3          | rs924517   | 0.435484  | 0.352981     | 0.000141627 |
| 6          | rs4711998  | 0.175627  | 0.250512     | 0.000143052 |
| 15         | rs7168742  | 0.116487  | 0.0706503    | 0.000146677 |
| 13         | rs9562431  | 0.256272  | 0.187798     | 0.000151909 |
| 13         | rs9567041  | 0.256272  | 0.187841     | 0.000152671 |
| 11         | rs10835415 | 0.354839  | 0.439378     | 0.000158118 |
| 5          | rs5009031  | 0.149281  | 0.0965541    | 0.000160512 |
| 4          | rs2383360  | 0.317204  | 0.243603     | 0.000164584 |
| 2          | rs2175149  | 0.413669  | 0.331685     | 0.000166241 |
| 2          | rs3762503  | 0.419065  | 0.337249     | 0.000167916 |
| 17         | rs1037261  | 0.5       | 0.414879     | 0.000168759 |
| 6          | rs6912373  | 0.383513  | 0.304259     | 0.000169607 |
| 18         | rs1052315  | 0.494585  | 0.410702     | 0.000171315 |
| 2          | rs4973370  | 0.333333  | 0.257581     | 0.000173911 |
| 8          | rs7846671  | 0.18705   | 0.262709     | 0.000173911 |
| 13         | rs1535902  | 0.259928  | 0.191086     | 0.000174784 |
| 16         | rs17679617 | 0.111111  | 0.175358     | 0.000177433 |
| 19         | rs10518285 | 0.566308  | 0.480579     | 0.000181026 |
| 11         | rs482202   | 0.362007  | 0.445674     | 0.000181936 |
| 18         | rs2048793  | 0.395683  | 0.316865     | 0.000182851 |
| 6          | rs9368920  | 0.387097  | 0.307732     | 0.000187493 |
| 15         | rs6494367  | 0.248201  | 0.182112     | 0.000191292 |
| 2          | rs17046767 | 0.130824  | 0.0828221    | 0.000193221 |
| 1          | rs3896178  | 0.336918  | 0.260818     | 0.000203162 |
| 3          | rs1457590  | 0.340502  | 0.423142     | 0.000207281 |
| 6          | rs6454330  | 0.365108  | 0.285836     | 0.000209372 |
| 3          | rs9289980  | 0.433453  | 0.353252     | 0.000221259 |
| 5          | rs6870449  | 0.129032  | 0.0811456    | 0.000226884 |
| 9          | rs10114001 | 0.318996  | 0.245913     | 0.000226884 |
| 9          | rs10982256 | 0.387097  | 0.47117      | 0.000226884 |
| 7          | rs6463435  | 0.487455  | 0.404567     | 0.000228026 |
| 20         | rs2253356  | 0.388489  | 0.470839     | 0.000230328 |
| 3          | rs4245886  | 0.544803  | 0.461172     | 0.000231488 |
| 7          | rs2270163  | 0.559353  | 0.475119     | 0.000235003 |
| 10         | rs10904884 | 0.548736  | 0.465995     | 0.000235003 |
| 2          | rs4973371  | 0.37276   | 0.29554      | 0.000240981 |
| 3          | rs1500925  | 0.405018  | 0.326583     | 0.000240981 |
| 6          | rs9321927  | 0.317204  | 0.24455      | 0.000240981 |
| 11         | rs1117733  | 0.366906  | 0.449268     | 0.000240981 |
| 6          | rs9399834  | 0.272401  | 0.35218      | 0.000242194 |
| 3          | rs6809003  | 0.419355  | 0.340375     | 0.000247112 |
| 11         | rs1589104  | 0.356631  | 0.43865      | 0.000247112 |
| 11         | rs4542397  | 0.364621  | 0.446903     | 0.000250866 |
| 3          | rs7642179  | 0.405018  | 0.326798     | 0.00025213  |
| 15         | rs17561681 | 0.0830325 | 0.0470668    | 0.00025213  |
| 3          | rs10451916 | 0.405018  | 0.326969     | 0.00025725  |

Table DS2: All SNPs tested for association (RDC SABP vs. controls) with the Cochran-Armitage trend test and significant at the p=0.05 threshold.

| chromosome | SNP        | MAF_cases | MAF_controls | p_value     |
|------------|------------|-----------|--------------|-------------|
| 7          | rs12673221 | 0.528674  | 0.445523     | 0.000266465 |
| 9          | rs11787667 | 0.393885  | 0.478001     | 0.000267808 |
| 19         | rs17581484 | 0.166667  | 0.112986     | 0.000269158 |
| 6          | rs9373718  | 0.272401  | 0.351499     | 0.00027325  |
| 15         | rs8032794  | 0.508993  | 0.426355     | 0.000274627 |
| 1          | rs676236   | 0.177419  | 0.247702     | 0.000277404 |
| 13         | rs7139662  | 0.145161  | 0.0956033    | 0.000277404 |
| 3          | rs11130855 | 0.208633  | 0.282942     | 0.000281622 |
| 5          | rs9325095  | 0.337545  | 0.263534     | 0.000281622 |
| 6          | rs9377558  | 0.232852  | 0.309816     | 0.000281622 |
| 10         | rs11254435 | 0.543165  | 0.46146      | 0.000281622 |
| 17         | rs1466113  | 0.5       | 0.41786      | 0.000281622 |
| 3          | rs995470   | 0.424731  | 0.34639      | 0.000291717 |
| 1          | rs7513434  | 0.216846  | 0.156325     | 0.000294667 |
| 3          | rs1978516  | 0.340502  | 0.421322     | 0.000296154 |
| 6          | rs13196054 | 0.362007  | 0.284715     | 0.000296154 |
| 10         | rs10490959 | 0.546595  | 0.465235     | 0.000296154 |
| 5          | rs17738710 | 0.107527  | 0.0654397    | 0.000311443 |
| 17         | rs12449441 | 0.215054  | 0.289196     | 0.000317779 |
| 1          | rs10916983 | 0.168459  | 0.114651     | 0.000319383 |
| 3          | rs13081038 | 0.402878  | 0.326176     | 0.000332515 |
| 10         | rs17157312 | 0.11828   | 0.0739857    | 0.000332515 |
| 9          | rs11999291 | 0.329137  | 0.256982     | 0.000337578 |
| 3          | rs13317601 | 0.32852   | 0.407989     | 0.000339283 |
| 11         | rs10835422 | 0.358423  | 0.438459     | 0.000342719 |
| 2          | rs11674872 | 0.260791  | 0.195674     | 0.000344451 |
| 13         | rs278050   | 0.138489  | 0.203647     | 0.000346191 |
| 6          | rs954349   | 0.38172   | 0.306171     | 0.00034794  |
| 6          | rs9496707  | 0.38172   | 0.306331     | 0.000351464 |
| 13         | rs16967411 | 0.13587   | 0.0884261    | 0.000351464 |
| 1          | rs10493267 | 0.15233   | 0.102896     | 0.00035324  |
| 10         | rs12218051 | 0.116487  | 0.0729131    | 0.000364086 |
| 22         | rs738043   | 0.182796  | 0.127214     | 0.000369635 |
| 2          | rs7557901  | 0.111111  | 0.0689714    | 0.000373381 |
| 3          | rs11130857 | 0.210432  | 0.283254     | 0.000373381 |
| 8          | rs13280864 | 0.345324  | 0.424361     | 0.000377166 |
| 9          | rs7466920  | 0.111111  | 0.0692648    | 0.000379073 |
| 16         | rs16967367 | 0.0967742 | 0.0576398    | 0.000380989 |
| 2          | rs3113210  | 0.272401  | 0.349693     | 0.00039072  |
| 10         | rs3824632  | 0.544964  | 0.465271     | 0.000398684 |
| 6          | rs4713951  | 0.492832  | 0.413799     | 0.000400701 |
| 10         | rs9299669  | 0.364621  | 0.291141     | 0.000402728 |
| 5          | rs10041283 | 0.332734  | 0.26127      | 0.000415108 |
| 2          | rs9653407  | 0.0340502 | 0.0754685    | 0.000419319 |
| 3          | rs9829496  | 0.331541  | 0.409618     | 0.000425718 |
| 5          | rs992017   | 0.124101  | 0.0792079    | 0.000425718 |
| 6          | rs2817027  | 0.405018  | 0.328396     | 0.000441033 |
| 3          | rs6781682  | 0.306452  | 0.238559     | 0.00044551  |
| 5          | rs10477376 | 0.335125  | 0.263794     | 0.00044551  |
| 3          | rs9831830  | 0.402878  | 0.327422     | 0.000447766 |
| 5          | rs6861078  | 0.344086  | 0.27175      | 0.000454602 |
| 4          | rs17072597 | 0.16129   | 0.109407     | 0.000461544 |

Table DS2: All SNPs tested for association (RDC SABP vs. controls) with the Cochran-Armitage trend test and significant at the p=0.05 threshold.

| chromosome | SNP        | MAF_cases | MAF_controls | p_value     |
|------------|------------|-----------|--------------|-------------|
| 6          | rs9365685  | 0.435484  | 0.358336     | 0.000463881 |
| 3          | rs9827708  | 0.362007  | 0.289635     | 0.000466231 |
| 5          | rs6450311  | 0.12724   | 0.0815736    | 0.000466231 |
| 6          | rs9386039  | 0.284946  | 0.218176     | 0.000466231 |
| 20         | rs1474949  | 0.272401  | 0.207792     | 0.000473352 |
| 3          | rs10936063 | 0.308244  | 0.240634     | 0.00047816  |
| 3          | rs10936066 | 0.308244  | 0.240634     | 0.00047816  |
| 18         | rs10853554 | 0.464158  | 0.386542     | 0.000487925 |
| 1          | rs12047439 | 0.301075  | 0.233197     | 0.00049538  |
| 6          | rs9380893  | 0.530686  | 0.451436     | 0.000497891 |
| 18         | rs17797866 | 0.465827  | 0.388037     | 0.000497891 |
| 15         | rs11858077 | 0.356115  | 0.285009     | 0.000502951 |
| 7          | rs3817518  | 0.48741   | 0.409772     | 0.000510638 |
| 9          | rs998548   | 0.379496  | 0.458092     | 0.000513227 |
| 10         | rs10997908 | 0.224014  | 0.164622     | 0.000513227 |
| 2          | rs16831028 | 0.231183  | 0.17155      | 0.000515829 |
| 5          | rs6886473  | 0.126354  | 0.0813397    | 0.000523715 |
| 5          | rs230737   | 0.12724   | 0.0819421    | 0.00052637  |
| 6          | rs1180241  | 0.367384  | 0.294719     | 0.00052637  |
| 21         | rs667362   | 0.367384  | 0.294208     | 0.000529039 |
| 11         | rs735665   | 0.137993  | 0.200887     | 0.000531722 |
| 9          | rs17088840 | 0.109319  | 0.068701     | 0.000537129 |
| 2          | rs12622810 | 0.0340502 | 0.0741056    | 0.000539854 |
| 1          | rs12043581 | 0.302867  | 0.235014     | 0.000542592 |
| 1          | rs12757611 | 0.302867  | 0.235014     | 0.000542592 |
| 5          | rs4867116  | 0.363799  | 0.441948     | 0.000545344 |
| 6          | rs6903663  | 0.412186  | 0.336908     | 0.000550891 |
| 1          | rs2407603  | 0.149281  | 0.101738     | 0.000559318 |
| 4          | rs7666924  | 0.363799  | 0.291922     | 0.000559318 |
| 6          | rs10484804 | 0.281362  | 0.215673     | 0.000559318 |
| 4          | rs12512265 | 0.0268817 | 0.0648842    | 0.000565009 |
| 5          | rs230769   | 0.12724   | 0.0821684    | 0.000567876 |
| 8          | rs17767910 | 0.469534  | 0.391966     | 0.000573654 |
| 22         | rs2075120  | 0.292115  | 0.224479     | 0.000573654 |
| 1          | rs12042464 | 0.302867  | 0.235334     | 0.000579492 |
| 5          | rs230753   | 0.12724   | 0.0822268    | 0.000579492 |
| 22         | rs688034   | 0.383513  | 0.310451     | 0.000579492 |
| 3          | rs951557   | 0.508961  | 0.429813     | 0.000582433 |
| 5          | rs6450303  | 0.12724   | 0.0822828    | 0.000588361 |
| 5          | rs10068216 | 0.333333  | 0.263534     | 0.000591348 |
| 3          | rs589445   | 0.125899  | 0.0813993    | 0.00059435  |
| 5          | rs7701019  | 0.126354  | 0.081657     | 0.00059435  |
| 3          | rs683395   | 0.123656  | 0.0801227    | 0.0006004   |
| 10         | rs2799019  | 0.556159  | 0.47889      | 0.0006004   |
| 1          | rs3904701  | 0.415771  | 0.494208     | 0.000603449 |
| 4          | rs1898170  | 0.550179  | 0.472687     | 0.000603449 |
| 14         | rs1152566  | 0.191756  | 0.137432     | 0.000618927 |
| 1          | rs3845541  | 0.419355  | 0.497617     | 0.00062523  |
| 6          | rs9462141  | 0.394265  | 0.320368     | 0.00062523  |
| 14         | rs10483676 | 0.206093  | 0.149915     | 0.00062523  |
| 5          | rs6453278  | 0.384892  | 0.313288     | 0.000628406 |
| 5          | rs17310469 | 0.105735  | 0.161845     | 0.000631598 |



Table DS2: All SNPs tested for association (RDC SABP vs. controls) with the Cochran-Armitage trend test and significant at the p=0.05 threshold.

| chromosome | SNP        | MAF_cases | MAF_controls | p_value     |
|------------|------------|-----------|--------------|-------------|
| 14         | rs9805984  | 0.196043  | 0.140982     | 0.000638032 |
| 3          | rs347970   | 0.195341  | 0.140204     | 0.000641273 |
| 12         | rs7975412  | 0.276978  | 0.21163      | 0.000641273 |
| 3          | rs1801143  | 0.367384  | 0.296284     | 0.000644531 |
| 16         | rs8060992  | 0.510791  | 0.431981     | 0.000654406 |
| 14         | rs6573109  | 0.202509  | 0.147149     | 0.000661074 |
| 16         | rs258322   | 0.0734767 | 0.123124     | 0.000661074 |
| 14         | rs1252917  | 0.226619  | 0.16803      | 0.000664434 |
| 15         | rs890319   | 0.396057  | 0.323059     | 0.000664434 |
| 1          | rs595888   | 0.201439  | 0.269087     | 0.000671205 |
| 1          | rs6660265  | 0.301075  | 0.234343     | 0.000674617 |
| 3          | rs6414500  | 0.125448  | 0.0816292    | 0.000678047 |
| 4          | rs11936367 | 0.358423  | 0.288298     | 0.000684958 |
| 7          | rs1011189  | 0.172043  | 0.120519     | 0.000684958 |
| 17         | rs3110496  | 0.238351  | 0.309775     | 0.000684958 |
| 1          | rs1997034  | 0.289568  | 0.224197     | 0.000695459 |
| 4          | rs2597498  | 0.532258  | 0.455707     | 0.00070255  |
| 5          | rs977877   | 0.333333  | 0.407679     | 0.000706123 |
| 8          | rs4609213  | 0.544803  | 0.468165     | 0.000706123 |
| 10         | rs7921658  | 0.113309  | 0.0722809    | 0.000706123 |
| 1          | rs4497239  | 0.148746  | 0.102044     | 0.000709714 |
| 18         | rs3760570  | 0.365591  | 0.29612      | 0.000709714 |
| 5          | rs2973322  | 0.42446   | 0.350596     | 0.000713323 |
| 4          | rs10030755 | 0.137993  | 0.198534     | 0.000724264 |
| 2          | rs11122861 | 0.0361011 | 0.0759278    | 0.000750455 |
| 15         | rs2725627  | 0.329749  | 0.404705     | 0.000754274 |
| 3          | rs12633429 | 0.306452  | 0.241144     | 0.000758113 |
| 17         | rs728291   | 0.446237  | 0.371935     | 0.000769747 |
| 4          | rs7671217  | 0.159498  | 0.10969      | 0.000773665 |
| 5          | rs251547   | 0.369176  | 0.299183     | 0.000777604 |
| 1          | rs2807339  | 0.304659  | 0.239012     | 0.000781562 |
| 7          | rs3128376  | 0.370968  | 0.4477       | 0.000785541 |
| 21         | rs2238704  | 0.231183  | 0.172966     | 0.000797602 |
| 3          | rs11130214 | 0.253597  | 0.325443     | 0.000809849 |
| 6          | rs4711689  | 0.353047  | 0.428547     | 0.000809849 |
| 6          | rs2859420  | 0.430108  | 0.356097     | 0.000826475 |
| 16         | rs11074446 | 0.0902527 | 0.142564     | 0.000826475 |
| 1          | rs4839202  | 0.292115  | 0.365542     | 0.000830685 |
| 6          | rs612262   | 0.4319    | 0.358018     | 0.000830685 |
| 10         | rs806813   | 0.37276   | 0.301466     | 0.000830685 |
| 2          | rs7558771  | 0.0361011 | 0.0751534    | 0.000834917 |
| 7          | rs6962818  | 0.148746  | 0.211001     | 0.000834917 |
| 16         | rs11076087 | 0.539427  | 0.462521     | 0.000834917 |
| 2          | rs16858223 | 0.0913978 | 0.0553474    | 0.00083917  |
| 6          | rs6923015  | 0.392086  | 0.31987      | 0.00083917  |
| 6          | rs9470162  | 0.392473  | 0.320368     | 0.00083917  |
| 2          | rs12711551 | 0.0358423 | 0.0744027    | 0.000843446 |
| 21         | rs2256441  | 0.231183  | 0.173195     | 0.000852063 |
| 7          | rs2721816  | 0.238351  | 0.179094     | 0.000856405 |
| 1          | rs11587701 | 0.125448  | 0.082369     | 0.000860769 |
| 7          | rs39112    | 0.336918  | 0.411524     | 0.000860769 |
| 4          | rs1436058  | 0.555755  | 0.481267     | 0.000865156 |

Table DS2: All SNPs tested for association (RDC SABP vs. controls) with the Cochran-Armitage trend test and significant at the p=0.05 threshold.

| chromosome | SNP           | MAF_cases | MAF_controls | p_value     |
|------------|---------------|-----------|--------------|-------------|
| 3          | rs11716239    | 0.31769   | 0.251194     | 0.000869565 |
| 1          | rs7517690     | 0.415771  | 0.491817     | 0.000878452 |
| 7          | rs711453      | 0.206093  | 0.151722     | 0.000878452 |
| 21         | rs965733      | 0.223022  | 0.166326     | 0.000878452 |
| 8          | rs17063833    | 0.156475  | 0.108607     | 0.00088293  |
| 6          | rs12208821    | 0.240143  | 0.30971      | 0.000887431 |
| 1          | rs4658158     | 0.257194  | 0.196252     | 0.000891955 |
| 6          | rs794114      | 0.453405  | 0.379216     | 0.000891955 |
| 6          | rs9470144     | 0.392473  | 0.320784     | 0.000896502 |
| 6          | rs639421      | 0.392473  | 0.320784     | 0.000896502 |
| 3          | rs2033701     | 0.168459  | 0.232277     | 0.000901073 |
| 1          | rs11102374    | 0.284946  | 0.357606     | 0.000905668 |
| 19         | rs4802386     | 0.296763  | 0.369023     | 0.000910286 |
| 5          | rs2914295     | 0.422939  | 0.350784     | 0.000914928 |
| 8          | rs284820      | 0.184588  | 0.132709     | 0.000914928 |
| 10         | rs7084535     | 0.113718  | 0.072938     | 0.000919594 |
| 4          | rs17011337    | 0.134409  | 0.0895777    | 0.000933736 |
| 5          | rs6897334     | 0.402174  | 0.33106      | 0.000933736 |
| 2          | rs12694063    | 0.224014  | 0.292305     | 0.000938499 |
| 6          | rs1984284     | 0.240072  | 0.30954      | 0.000938499 |
| 11         | rs4758161     | 0.157706  | 0.109673     | 0.000938499 |
| 17         | rs9892725     | 0.401079  | 0.329986     | 0.000938499 |
| 3          | rs7648599     | 0.303249  | 0.239182     | 0.000943286 |
| 8          | rs10755940    | 0.143369  | 0.0975111    | 0.000943286 |
| 5          | rs4703727     | 0.34657   | 0.279713     | 0.000948098 |
| 1          | rs10889189    | 0.543165  | 0.467155     | 0.000952935 |
| 8          | rs7008117     | 0.27957   | 0.216718     | 0.000952935 |
| 20         | rs2249573     | 0.410072  | 0.484338     | 0.000952935 |
| 1          | rs11207488    | 0.131295  | 0.088476     | 0.000957797 |
| 2          | rs1379037     | 0.0215827 | 0.0553286    | 0.000962684 |
| 3          | rs1403108     | 0.304659  | 0.240804     | 0.000962684 |
| 5          | rs3734120     | 0.329749  | 0.262772     | 0.000962684 |
| 7          | rs10261578    | 0.544803  | 0.470548     | 0.000962684 |
| 8          | rs6984769     | 0.227599  | 0.169962     | 0.000962684 |
| 3          | rs6997        | 0.367384  | 0.298398     | 0.000967596 |
| 14         | rs10484085    | 0.234767  | 0.176601     | 0.000967596 |
| 1          | rs6704387     | 0.159498  | 0.111717     | 0.000972534 |
| 2          | rs16866183    | 0.297491  | 0.23314      | 0.000982486 |
| 3          | rs6549514     | 0.560932  | 0.486537     | 0.00099254  |
| 3          | rs11708353    | 0.317204  | 0.251618     | 0.00099254  |
| 5          | rs1471091     | 0.124101  | 0.0815421    | 0.000997606 |
| 12         | rs11173188    | 0.397849  | 0.471891     | 0.000997606 |
| 18         | rs9955895     | 0.215827  | 0.159741     | 0.000997606 |
| 18         | SNP_A-1941351 | 0.215054  | 0.159168     | 0.000997606 |
| 12         | rs11054800    | 0.386691  | 0.316518     | 0.001002699 |
| 1          | rs4320765     | 0.422383  | 0.497787     | 0.001007818 |
| 1          | rs11577233    | 0.154122  | 0.107726     | 0.001018134 |
| 5          | rs11748160    | 0.439068  | 0.366803     | 0.001023333 |
| 9          | rs1927117     | 0.106115  | 0.0680655    | 0.001023333 |
| 14         | rs1252982     | 0.194946  | 0.141982     | 0.001023333 |
| 3          | rs6414498     | 0.123656  | 0.0814033    | 0.001028558 |
| 6          | rs9462132     | 0.390681  | 0.319734     | 0.001028558 |

Table DS2: All SNPs tested for association (RDC SABP vs. controls) with the Cochran-Armitage trend test and significant at the p=0.05 threshold.

| chromosome | SNP        | MAF_cases | MAF_controls | p_value     |
|------------|------------|-----------|--------------|-------------|
| 6          | rs6917851  | 0.370504  | 0.299693     | 0.001028558 |
| 4          | rs17226273 | 0.297101  | 0.369714     | 0.00103381  |
| 10         | rs1655148  | 0.306452  | 0.240968     | 0.00103381  |
| 4          | rs4285137  | 0.222222  | 0.165587     | 0.00103909  |
| 6          | rs2815143  | 0.231183  | 0.174573     | 0.00103909  |
| 15         | rs1398873  | 0.0899281 | 0.0550427    | 0.00103909  |
| 11         | rs4930634  | 0.512545  | 0.438053     | 0.001055092 |
| 2          | rs10432492 | 0.283154  | 0.220954     | 0.001060481 |
| 6          | rs9470147  | 0.392086  | 0.321221     | 0.001060481 |
| 14         | rs723893   | 0.143369  | 0.202666     | 0.001060481 |
| 19         | rs2061332  | 0.197133  | 0.144195     | 0.001060481 |
| 10         | rs927045   | 0.168459  | 0.11852      | 0.001071343 |
| 4          | rs4859480  | 0.112903  | 0.0732788    | 0.001076817 |
| 6          | rs9470126  | 0.390681  | 0.320041     | 0.001076817 |
| 6          | rs9470139  | 0.390681  | 0.320041     | 0.001076817 |
| 16         | rs8058660  | 0.53777   | 0.462155     | 0.001076817 |
| 7          | rs2529162  | 0.118705  | 0.174224     | 0.001082318 |
| 6          | rs668438   | 0.374552  | 0.30548      | 0.001087848 |
| 6          | rs17705020 | 0.390681  | 0.32015      | 0.001093407 |
| 5          | rs251562   | 0.177536  | 0.127257     | 0.001098994 |
| 3          | rs7610779  | 0.292115  | 0.228883     | 0.00110461  |
| 6          | rs6457862  | 0.390681  | 0.320211     | 0.00110461  |
| 1          | rs10789359 | 0.428315  | 0.502383     | 0.001121634 |
| 6          | rs9470138  | 0.390681  | 0.320334     | 0.001121634 |
| 8          | rs11998174 | 0.318996  | 0.253914     | 0.001121634 |
| 17         | rs8072452  | 0.0734767 | 0.121036     | 0.001121634 |
| 1          | rs269079   | 0.303957  | 0.376195     | 0.00113313  |
| 5          | rs401889   | 0.5       | 0.425894     | 0.00113313  |
| 15         | rs11070411 | 0.127698  | 0.185286     | 0.00113313  |
| 1          | rs655856   | 0.304659  | 0.377044     | 0.001138922 |
| 9          | rs10113994 | 0.1787    | 0.128279     | 0.001138922 |
| 10         | rs2506101  | 0.354317  | 0.287641     | 0.001138922 |
| 1          | rs4504912  | 0.161871  | 0.11448      | 0.001144745 |
| 2          | rs11675299 | 0.314748  | 0.387866     | 0.001156481 |
| 1          | rs4456055  | 0.543011  | 0.469537     | 0.001162394 |
| 2          | rs6711054  | 0.133094  | 0.0895114    | 0.001162394 |
| 3          | rs1464402  | 0.141577  | 0.0966587    | 0.001162394 |
| 6          | rs4340986  | 0.390681  | 0.32043      | 0.001162394 |
| 6          | rs10947594 | 0.374101  | 0.305489     | 0.001162394 |
| 3          | rs6548642  | 0.37276   | 0.446562     | 0.001174313 |
| 11         | rs2028960  | 0.124101  | 0.0818584    | 0.001174313 |
| 13         | rs9519627  | 0.510753  | 0.437841     | 0.001174313 |
| 1          | rs4844486  | 0.324373  | 0.25919      | 0.001186356 |
| 4          | rs6826826  | 0.11828   | 0.174446     | 0.001186356 |
| 4          | rs4289492  | 0.168459  | 0.11968      | 0.001186356 |
| 6          | rs9462128  | 0.389892  | 0.319653     | 0.001186356 |
| 15         | rs17795279 | 0.125899  | 0.183231     | 0.001186356 |
| 17         | rs998571   | 0.267025  | 0.337193     | 0.001186356 |
| 3          | rs2291542  | 0.256272  | 0.325546     | 0.001198523 |
| 5          | rs391781   | 0.516245  | 0.442589     | 0.001198523 |
| 6          | rs9358278  | 0.263441  | 0.204026     | 0.001198523 |
| 14         | rs7160685  | 0.388489  | 0.319843     | 0.001204654 |

Table DS2: All SNPs tested for association (RDC SABP vs. controls) with the Cochran-Armitage trend test and significant at the p=0.05 threshold.

| chromosome | SNP        | MAF_cases | MAF_controls | p_value     |
|------------|------------|-----------|--------------|-------------|
| 1          | rs12568876 | 0.394265  | 0.325367     | 0.001210817 |
| 3          | rs6548639  | 0.37276   | 0.446282     | 0.001210817 |
| 11         | rs1939120  | 0.0806452 | 0.12934      | 0.001210817 |
| 19         | rs11670935 | 0.140288  | 0.198502     | 0.001210817 |
| 4          | rs4859489  | 0.112903  | 0.0735695    | 0.001217012 |
| 9          | rs17334309 | 0.562724  | 0.489093     | 0.001217012 |
| 4          | rs6813843  | 0.22043   | 0.28569      | 0.001223239 |
| 6          | rs10484264 | 0.374552  | 0.305792     | 0.001223239 |
| 10         | rs181644   | 0.351254  | 0.284401     | 0.001223239 |
| 1          | rs12126062 | 0.557348  | 0.483833     | 0.001229498 |
| 1          | rs12126688 | 0.557348  | 0.48381      | 0.001229498 |
| 2          | rs17046986 | 0.316547  | 0.251617     | 0.001229498 |
| 13         | rs1499318  | 0.537634  | 0.463701     | 0.001235789 |
| 17         | rs2052022  | 0.383513  | 0.457893     | 0.001242113 |
| 3          | rs9884080  | 0.37276   | 0.446149     | 0.001261282 |
| 4          | rs4460017  | 0.111913  | 0.0728172    | 0.001267738 |
| 16         | rs9935994  | 0.0896057 | 0.139646     | 0.001267738 |
| 11         | rs12577551 | 0.367384  | 0.440034     | 0.001274228 |
| 1          | rs1461356  | 0.49278   | 0.419025     | 0.001280751 |
| 7          | rs17465328 | 0.204301  | 0.151618     | 0.001280751 |
| 19         | rs10412896 | 0.285971  | 0.355559     | 0.001280751 |
| 6          | rs7773103  | 0.526882  | 0.453599     | 0.001287308 |
| 2          | rs996712   | 0.138989  | 0.198055     | 0.001293899 |
| 11         | rs11021509 | 0.0806452 | 0.0485189    | 0.001293899 |
| 5          | rs17575164 | 0.259857  | 0.200716     | 0.001300524 |
| 14         | rs6573108  | 0.202509  | 0.149847     | 0.001300524 |
| 6          | rs611623   | 0.446237  | 0.374318     | 0.001307183 |
| 6          | rs9351920  | 0.0896057 | 0.0552524    | 0.001307183 |
| 10         | rs10787524 | 0.202166  | 0.149455     | 0.001307183 |
| 9          | rs10739166 | 0.397849  | 0.471039     | 0.001313877 |
| 3          | rs7636827  | 0.417563  | 0.347752     | 0.001327369 |
| 12         | rs1450542  | 0.301075  | 0.238501     | 0.001327369 |
| 16         | rs12596903 | 0.0896057 | 0.139428     | 0.001327369 |
| 6          | rs1892392  | 0.476703  | 0.403781     | 0.001334168 |
| 17         | rs11077698 | 0.419355  | 0.348893     | 0.001334168 |
| 19         | rs17705279 | 0.184588  | 0.133822     | 0.001334168 |
| 5          | rs6888871  | 0.124101  | 0.0822268    | 0.001347871 |
| 20         | rs2208297  | 0.227599  | 0.171774     | 0.001347871 |
| 1          | rs1156495  | 0.263441  | 0.204019     | 0.001354776 |
| 7          | rs802437   | 0.302867  | 0.373292     | 0.001354776 |
| 10         | rs3006663  | 0.363799  | 0.296971     | 0.001361716 |
| 11         | rs7126943  | 0.297491  | 0.367337     | 0.001368693 |
| 2          | rs7581649  | 0.133094  | 0.190314     | 0.001375706 |
| 11         | rs4758635  | 0.517921  | 0.445278     | 0.001375706 |
| 6          | rs9356198  | 0.390681  | 0.322037     | 0.001382755 |
| 16         | rs2001970  | 0.539427  | 0.46577      | 0.001382755 |
| 10         | rs6482373  | 0.09319   | 0.0587734    | 0.001389841 |
| 2          | rs10165555 | 0.146953  | 0.205652     | 0.001396964 |
| 4          | rs13111817 | 0.221223  | 0.285836     | 0.001396964 |
| 9          | rs10967973 | 0.40681   | 0.47872      | 0.00141132  |
| 10         | rs11244474 | 0.130824  | 0.0885559    | 0.00141132  |
| 6          | rs7762984  | 0.0896057 | 0.0555366    | 0.001418554 |

Table DS2: All SNPs tested for association (RDC SABP vs. controls) with the Cochran-Armitage trend test and significant at the p=0.05 threshold.

| chromosome | SNP        | MAF_cases | MAF_controls | p_value     |
|------------|------------|-----------|--------------|-------------|
| 7          | rs4416760  | 0.263441  | 0.204429     | 0.001418554 |
| 11         | rs10896390 | 0.510753  | 0.438246     | 0.001418554 |
| 10         | rs2998074  | 0.363799  | 0.297173     | 0.001425825 |
| 12         | rs4540857  | 0.390681  | 0.462325     | 0.001425825 |
| 7          | rs6462277  | 0.062724  | 0.107558     | 0.001433135 |
| 6          | rs2816559  | 0.226619  | 0.292745     | 0.001440482 |
| 14         | rs17107879 | 0.0773381 | 0.0462142    | 0.001440482 |
| 3          | rs9310649  | 0.347122  | 0.417631     | 0.001455291 |
| 5          | rs17574616 | 0.326165  | 0.262018     | 0.001455291 |
| 3          | rs3749237  | 0.258065  | 0.326124     | 0.001470255 |
| 11         | rs17599114 | 0.0899281 | 0.0560859    | 0.001470255 |
| 13         | rs7329514  | 0.0824373 | 0.0500681    | 0.001470255 |
| 4          | rs10518170 | 0.112903  | 0.0740804    | 0.001477795 |
| 5          | rs230785   | 0.115523  | 0.0760164    | 0.001477795 |
| 11         | rs10835148 | 0.293907  | 0.363032     | 0.001477795 |
| 2          | rs2011559  | 0.207885  | 0.154056     | 0.001485374 |
| 4          | rs12503342 | 0.0215827 | 0.0536627    | 0.001485374 |
| 11         | rs10450561 | 0.311828  | 0.381722     | 0.001485374 |
| 1          | rs4949511  | 0.182796  | 0.132207     | 0.00150065  |
| 14         | rs7156962  | 0.0647482 | 0.109748     | 0.00150065  |
| 1          | rs12037277 | 0.440647  | 0.370572     | 0.001508348 |
| 6          | rs6455953  | 0.480287  | 0.408424     | 0.001508348 |
| 9          | rs2905077  | 0.201087  | 0.264475     | 0.001508348 |
| 12         | rs7310815  | 0.0845324 | 0.133197     | 0.001508348 |
| 15         | rs783483   | 0.263441  | 0.205111     | 0.001508348 |
| 2          | rs10173017 | 0.267025  | 0.334639     | 0.001516086 |
| 3          | rs7627376  | 0.55914   | 0.486362     | 0.001516086 |
| 20         | rs6046263  | 0.274545  | 0.342697     | 0.001516086 |
| 4          | rs961719   | 0.51259   | 0.439544     | 0.001523864 |
| 6          | rs3117230  | 0.17148   | 0.232228     | 0.001523864 |
| 5          | rs2973319  | 0.419355  | 0.350477     | 0.001531683 |
| 13         | rs12584910 | 0.536101  | 0.46324      | 0.001531683 |
| 4          | rs10440412 | 0.215054  | 0.161675     | 0.001539542 |
| 2          | rs765716   | 0.251799  | 0.19357      | 0.001547442 |
| 3          | rs7617143  | 0.55914   | 0.486542     | 0.001547442 |
| 4          | rs11729064 | 0.219424  | 0.16485      | 0.001547442 |
| 6          | rs2815167  | 0.231183  | 0.1762       | 0.001555383 |
| 16         | rs9888979  | 0.0949821 | 0.0596581    | 0.001555383 |
| 1          | rs3121273  | 0.339928  | 0.410702     | 0.001563365 |
| 1          | rs4650197  | 0.555755  | 0.483623     | 0.001563365 |
| 5          | rs13355543 | 0.422383  | 0.353272     | 0.001563365 |
| 14         | rs12435412 | 0.197842  | 0.146969     | 0.001563365 |
| 15         | rs17137358 | 0.22043   | 0.166098     | 0.001563365 |
| 2          | rs4378785  | 0.142086  | 0.198838     | 0.001571389 |
| 5          | rs2560301  | 0.236559  | 0.302488     | 0.001571389 |
| 7          | rs12673596 | 0.266187  | 0.33356      | 0.001571389 |
| 7          | rs896763   | 0.555556  | 0.483458     | 0.001571389 |
| 11         | rs1478690  | 0.299283  | 0.368188     | 0.001571389 |
| 4          | rs6856651  | 0.353047  | 0.287812     | 0.001579454 |
| 7          | rs7793055  | 0.0827338 | 0.131086     | 0.001579454 |
| 14         | rs758914   | 0.22043   | 0.16644      | 0.001579454 |
| 17         | rs1005322  | 0.564516  | 0.491479     | 0.001579454 |

Table DS2: All SNPs tested for association (RDC SABP vs. controls) with the Cochran-Armitage trend test and significant at the p=0.05 threshold.

| chromosome | SNP           | MAF_cases | MAF_controls | p_value     |
|------------|---------------|-----------|--------------|-------------|
| 20         | rs6014619     | 0.413978  | 0.345262     | 0.001579454 |
| 9          | rs10982946    | 0.0573477 | 0.0997617    | 0.001587562 |
| 2          | rs934037      | 0.146953  | 0.204638     | 0.001595711 |
| 5          | rs10066974    | 0.310036  | 0.247869     | 0.001595711 |
| 7          | rs3801140     | 0.198925  | 0.261759     | 0.001595711 |
| 5          | rs251169      | 0.354839  | 0.424872     | 0.001603903 |
| 5          | rs12518635    | 0.392086  | 0.325043     | 0.001603903 |
| 8          | rs721300      | 0.305755  | 0.243782     | 0.001603903 |
| 13         | rs622219      | 0.329749  | 0.266052     | 0.001603903 |
| 7          | rs3801164     | 0.473118  | 0.402825     | 0.001612138 |
| 2          | rs7595011     | 0.390681  | 0.323399     | 0.001620415 |
| 3          | rs2874616     | 0.303957  | 0.242667     | 0.001620415 |
| 5          | rs4705247     | 0.354839  | 0.288802     | 0.001620415 |
| 6          | rs9460102     | 0.21147   | 0.157913     | 0.001620415 |
| 20         | rs6041827     | 0.0557554 | 0.0975111    | 0.001620415 |
| 7          | rs3801139     | 0.198925  | 0.26158      | 0.001628736 |
| 7          | rs12670690    | 0.267025  | 0.334072     | 0.001628736 |
| 1          | rs4844484     | 0.367754  | 0.300616     | 0.0016371   |
| 5          | rs230768      | 0.123188  | 0.08197      | 0.0016371   |
| 1          | SNP_A-4250770 | 0.0806452 | 0.0486726    | 0.001645507 |
| 2          | rs1836729     | 0.453405  | 0.383135     | 0.001645507 |
| 8          | rs2618850     | 0.293165  | 0.232947     | 0.001645507 |
| 11         | rs16922683    | 0.113309  | 0.0744027    | 0.001645507 |
| 19         | rs7249565     | 0.476619  | 0.405631     | 0.001645507 |
| 1          | rs356085      | 0.258993  | 0.326635     | 0.001679576 |
| 10         | rs11253967    | 0.107914  | 0.160757     | 0.001679576 |
| 10         | rs10823717    | 0.539427  | 0.467621     | 0.001679576 |
| 17         | rs8073244     | 0.222022  | 0.167977     | 0.001679576 |
| 5          | rs251171      | 0.353047  | 0.422749     | 0.001688204 |
| 8          | rs731589      | 0.403226  | 0.33589      | 0.001688204 |
| 11         | rs2602813     | 0.433692  | 0.364147     | 0.001688204 |
| 21         | rs11088486    | 0.362007  | 0.432128     | 0.001688204 |
| 2          | rs13020820    | 0.46223   | 0.392748     | 0.001696877 |
| 2          | rs16839945    | 0.0322581 | 0.0671438    | 0.001696877 |
| 5          | rs1008661     | 0.392473  | 0.325843     | 0.001696877 |
| 11         | rs1013273     | 0.30036   | 0.238923     | 0.001696877 |
| 6          | rs872956      | 0.172043  | 0.232459     | 0.001705596 |
| 7          | rs1528542     | 0.157706  | 0.112662     | 0.001705596 |
| 7          | rs4496905     | 0.263441  | 0.205281     | 0.001705596 |
| 8          | rs7016743     | 0.406475  | 0.339298     | 0.001705596 |
| 5          | rs17151248    | 0.137993  | 0.194104     | 0.001723169 |
| 8          | rs4278161     | 0.40681   | 0.477622     | 0.001723169 |
| 8          | rs7016774     | 0.40681   | 0.339639     | 0.001723169 |
| 15         | rs17780920    | 0.137184  | 0.192767     | 0.001723169 |
| 17         | rs4968913     | 0.417563  | 0.348707     | 0.001723169 |
| 1          | rs7523658     | 0.269784  | 0.210051     | 0.001740925 |
| 1          | rs840501      | 0.314748  | 0.251191     | 0.001740925 |
| 6          | rs9470131     | 0.388087  | 0.320273     | 0.001740925 |
| 6          | rs12191369    | 0.365108  | 0.297778     | 0.001740925 |
| 12         | rs7966814     | 0.532374  | 0.46032      | 0.001758867 |
| 4          | rs1516692     | 0.447842  | 0.377641     | 0.001786132 |
| 11         | rs898367      | 0.323741  | 0.260729     | 0.001786132 |

Table DS2: All SNPs tested for association (RDC SABP vs. controls) with the Cochran-Armitage trend test and significant at the p=0.05 threshold.

| chromosome | SNP        | MAF_cases | MAF_controls | p_value     |
|------------|------------|-----------|--------------|-------------|
| 7          | rs846319   | 0.5       | 0.429496     | 0.001795316 |
| 4          | rs7654531  | 0.354839  | 0.290345     | 0.001804547 |
| 6          | rs161755   | 0.514337  | 0.443364     | 0.001804547 |
| 6          | rs9295262  | 0.4319    | 0.362274     | 0.001804547 |
| 11         | rs10082611 | 0.312274  | 0.381229     | 0.001804547 |
| 11         | rs1975259  | 0.381295  | 0.314291     | 0.001804547 |
| 3          | rs9845005  | 0.261649  | 0.204019     | 0.001813826 |
| 9          | rs1416322  | 0.120504  | 0.174898     | 0.001813826 |
| 5          | rs272199   | 0.370968  | 0.304363     | 0.001823153 |
| 6          | rs7771851  | 0.553957  | 0.482624     | 0.001823153 |
| 7          | rs10951005 | 0.222222  | 0.28569      | 0.001823153 |
| 16         | rs1946127  | 0.428315  | 0.360354     | 0.001823153 |
| 16         | rs7196635  | 0.206093  | 0.268471     | 0.00183253  |
| 18         | rs17798863 | 0.159498  | 0.11359      | 0.00183253  |
| 19         | rs8102426  | 0.462366  | 0.393125     | 0.00183253  |
| 10         | rs10828123 | 0.111111  | 0.0735244    | 0.001841955 |
| 20         | rs6060436  | 0.188849  | 0.139088     | 0.001841955 |
| 6          | rs7764611  | 0.154122  | 0.108703     | 0.001851429 |
| 19         | rs8102257  | 0.0778986 | 0.0470668    | 0.001851429 |
| 4          | rs10011041 | 0.307554  | 0.245913     | 0.001860952 |
| 8          | rs7841871  | 0.281362  | 0.221825     | 0.001860952 |
| 11         | rs10835150 | 0.299283  | 0.36694      | 0.001860952 |
| 3          | rs4856447  | 0.375451  | 0.446489     | 0.001870526 |
| 10         | rs743106   | 0.167266  | 0.11955      | 0.001870526 |
| 1          | rs2987775  | 0.387097  | 0.457792     | 0.001880149 |
| 1          | rs4593761  | 0.564516  | 0.493183     | 0.001880149 |
| 4          | rs6448625  | 0.285971  | 0.353442     | 0.001880149 |
| 3          | rs2712473  | 0.532258  | 0.461329     | 0.001889822 |
| 5          | rs34973    | 0.241935  | 0.186478     | 0.001899546 |
| 4          | rs1523504  | 0.363799  | 0.433799     | 0.00190932  |
| 8          | rs720406   | 0.263441  | 0.205451     | 0.00190932  |
| 11         | rs10839718 | 0.130435  | 0.0890598    | 0.00190932  |
| 2          | rs4666283  | 0.249104  | 0.315395     | 0.001919146 |
| 3          | rs10936081 | 0.305755  | 0.245228     | 0.001919146 |
| 20         | rs6099273  | 0.304659  | 0.243363     | 0.001919146 |
| 21         | rs2822391  | 0.373646  | 0.444766     | 0.001919146 |
| 21         | rs2040130  | 0.17148   | 0.230337     | 0.001919146 |
| 12         | rs4764188  | 0.302867  | 0.370698     | 0.001929023 |
| 16         | rs11866328 | 0.496416  | 0.424991     | 0.001929023 |
| 1          | rs4233103  | 0.560932  | 0.49029      | 0.001938951 |
| 5          | rs17151230 | 0.145161  | 0.201365     | 0.001938951 |
| 6          | rs12209659 | 0.175627  | 0.127641     | 0.001938951 |
| 7          | rs6967312  | 0.539711  | 0.469836     | 0.001938951 |
| 10         | rs7077231  | 0.103943  | 0.155685     | 0.001938951 |
| 12         | rs1368561  | 0.354317  | 0.288828     | 0.001938951 |
| 12         | rs10860687 | 0.123656  | 0.176881     | 0.001948931 |
| 15         | rs901130   | 0.236559  | 0.301022     | 0.001948931 |
| 4          | rs17086016 | 0.28853   | 0.356437     | 0.001958963 |
| 14         | rs17622868 | 0.0645161 | 0.10814      | 0.001958963 |
| 2          | rs6739651  | 0.0917266 | 0.058211     | 0.001969048 |
| 3          | rs6785022  | 0.0701439 | 0.114573     | 0.001969048 |
| 3          | rs1995402  | 0.342294  | 0.411725     | 0.001979185 |

Table DS2: All SNPs tested for association (RDC SABP vs. controls) with the Cochran-Armitage trend test and significant at the p=0.05 threshold.

| chromosome | SNP        | MAF_cases | MAF_controls | p_value     |
|------------|------------|-----------|--------------|-------------|
| 10         | rs2479904  | 0.134409  | 0.09294      | 0.001979185 |
| 15         | rs11630941 | 0.396057  | 0.466951     | 0.001979185 |
| 17         | rs1021891  | 0.238351  | 0.183243     | 0.001979185 |
| 8          | rs1487745  | 0.141577  | 0.0987066    | 0.001989375 |
| 8          | rs9642819  | 0.31295   | 0.250851     | 0.001989375 |
| 11         | rs502249   | 0.412186  | 0.481753     | 0.001989375 |
| 1          | rs6678087  | 0.366426  | 0.436711     | 0.001999618 |
| 4          | rs4416501  | 0.111511  | 0.0738404    | 0.001999618 |
| 5          | rs272194   | 0.32554   | 0.262709     | 0.001999618 |
| 11         | rs12574595 | 0.30036   | 0.239843     | 0.001999618 |
| 17         | rs4968914  | 0.417563  | 0.349677     | 0.001999618 |
| 4          | rs3910478  | 0.311151  | 0.249574     | 0.002009915 |
| 5          | rs4976606  | 0.376344  | 0.447359     | 0.002009915 |
| 12         | rs11113426 | 0.374552  | 0.309134     | 0.002009915 |
| 13         | rs7338200  | 0.192446  | 0.254171     | 0.002009915 |
| 11         | rs4944722  | 0.256272  | 0.321477     | 0.002020265 |
| 16         | rs1420239  | 0.244604  | 0.308753     | 0.002020265 |
| 18         | rs11664217 | 0.365108  | 0.300511     | 0.002020265 |
| 10         | rs11018140 | 0.155914  | 0.111168     | 0.00203067  |
| 9          | rs7032564  | 0.422939  | 0.355416     | 0.002041129 |
| 11         | rs2373907  | 0.322581  | 0.26047      | 0.002041129 |
| 8          | rs7831358  | 0.0806452 | 0.126833     | 0.002062211 |
| 15         | rs2665210  | 0.104693  | 0.153964     | 0.002062211 |
| 17         | rs12452093 | 0.0358423 | 0.0714042    | 0.002062211 |
| 18         | rs11080987 | 0.365108  | 0.300648     | 0.002062211 |
| 2          | rs6741819  | 0.339928  | 0.276038     | 0.002072834 |
| 5          | rs4895236  | 0.123656  | 0.0836742    | 0.002072834 |
| 7          | rs2529158  | 0.123656  | 0.176431     | 0.002072834 |
| 9          | rs7044577  | 0.34657   | 0.415503     | 0.002072834 |
| 11         | rs17142991 | 0.299283  | 0.239093     | 0.002072834 |
| 13         | rs1543551  | 0.37276   | 0.307574     | 0.002072834 |
| 18         | rs7231250  | 0.292115  | 0.358384     | 0.002072834 |
| 21         | rs720935   | 0.181655  | 0.133231     | 0.002072834 |
| 1          | rs6677463  | 0.222022  | 0.286299     | 0.002083513 |
| 3          | rs1441952  | 0.335125  | 0.404705     | 0.002083513 |
| 9          | rs7035694  | 0.336918  | 0.405281     | 0.002083513 |
| 11         | rs7125281  | 0.189964  | 0.14079      | 0.002083513 |
| 11         | rs11020080 | 0.326165  | 0.394683     | 0.002083513 |
| 2          | rs17758464 | 0.163082  | 0.116865     | 0.002094248 |
| 4          | rs17082122 | 0.192446  | 0.142735     | 0.002094248 |
| 13         | rs7317605  | 0.371841  | 0.306787     | 0.002105039 |
| 1          | rs3127556  | 0.306452  | 0.374276     | 0.002115887 |
| 3          | rs4260455  | 0.442446  | 0.373124     | 0.002115887 |
| 7          | rs699491   | 0.498208  | 0.428839     | 0.002115887 |
| 8          | rs7815567  | 0.415162  | 0.34833      | 0.002115887 |
| 11         | rs10767628 | 0.31295   | 0.380416     | 0.002115887 |
| 15         | rs7171443  | 0.301075  | 0.369587     | 0.002115887 |
| 1          | rs12035615 | 0.181004  | 0.24081      | 0.002126791 |
| 3          | rs1522392  | 0.304659  | 0.244891     | 0.002126791 |
| 7          | rs1976131  | 0.0304659 | 0.0641593    | 0.002126791 |
| 18         | rs9947445  | 0.46223   | 0.394674     | 0.002126791 |
| 1          | rs3118223  | 0.306452  | 0.374064     | 0.002137752 |



Table DS2: All SNPs tested for association (RDC SABP vs. controls) with the Cochran-Armitage trend test and significant at the p=0.05 threshold.

| chromosome | SNP        | MAF_cases | MAF_controls | p_value     |
|------------|------------|-----------|--------------|-------------|
| 5          | rs1477623  | 0.307554  | 0.247015     | 0.002137752 |
| 11         | rs12797951 | 0.179211  | 0.238923     | 0.002141051 |
| 1          | rs414909   | 0.242806  | 0.306985     | 0.002145459 |
| 1          | rs2989476  | 0.496416  | 0.42604      | 0.002145459 |
| 9          | rs7046458  | 0.442652  | 0.374915     | 0.002149875 |
| 4          | rs13102419 | 0.410072  | 0.480075     | 0.002168749 |
| 10         | rs7921636  | 0.204301  | 0.265678     | 0.002176569 |
| 5          | rs12513672 | 0.159498  | 0.114218     | 0.002178809 |
| 2          | rs1456583  | 0.0232975 | 0.0538698    | 0.002186666 |
| 1          | rs2821391  | 0.231183  | 0.293626     | 0.00218779  |
| 2          | rs7595450  | 0.0878136 | 0.0556694    | 0.00218779  |
| 5          | rs2284988  | 0.392473  | 0.327357     | 0.002200202 |
| 11         | rs11020082 | 0.327338  | 0.395472     | 0.002204732 |
| 20         | rs6099265  | 0.340502  | 0.277513     | 0.002205867 |
| 4          | rs1503890  | 0.333333  | 0.270528     | 0.002207001 |
| 6          | rs9361356  | 0.163082  | 0.117257     | 0.002207001 |
| 15         | rs16957715 | 0.139785  | 0.194208     | 0.002209273 |
| 1          | rs11264608 | 0.261649  | 0.204197     | 0.002213823 |
| 1          | rs3738395  | 0.0758123 | 0.120907     | 0.002214962 |
| 6          | rs2179920  | 0.173835  | 0.232891     | 0.002220665 |
| 8          | rs2205362  | 0.404676  | 0.339188     | 0.002222951 |
| 6          | rs4709863  | 0.467626  | 0.398536     | 0.002236715 |
| 19         | rs11670976 | 0.143369  | 0.198332     | 0.002237866 |
| 7          | rs10281098 | 0.0286738 | 0.0616485    | 0.002240169 |
| 18         | rs2155771  | 0.155914  | 0.111679     | 0.002241322 |
| 7          | rs846322   | 0.498208  | 0.429205     | 0.002242475 |
| 10         | rs11003227 | 0.421147  | 0.490791     | 0.002249408 |
| 2          | rs11676122 | 0.0913978 | 0.0581316    | 0.002258685 |
| 6          | rs2503296  | 0.227599  | 0.29063      | 0.002259847 |
| 6          | rs9403505  | 0.404332  | 0.337653     | 0.00226101  |
| 11         | rs4936823  | 0.22      | 0.283396     | 0.002263338 |
| 1          | rs10752963 | 0.460573  | 0.392504     | 0.002276184 |
| 3          | rs9818551  | 0.208633  | 0.157187     | 0.002280873 |
| 20         | rs4505594  | 0.0573477 | 0.097752     | 0.002282047 |
| 2          | rs6761891  | 0.261649  | 0.20388      | 0.002284397 |
| 3          | rs1562524  | 0.40681   | 0.475631     | 0.002285573 |
| 12         | rs17314381 | 0.353047  | 0.288756     | 0.002290282 |
| 5          | rs10039324 | 0.0501792 | 0.0888965    | 0.002291461 |
| 6          | rs17435970 | 0.157706  | 0.112628     | 0.00229264  |
| 16         | rs1364319  | 0.370968  | 0.306776     | 0.002298547 |
| 6          | rs9386085  | 0.133094  | 0.0914843    | 0.002302098 |
| 1          | rs4661081  | 0.261649  | 0.204429     | 0.002304469 |
| 10         | rs1342335  | 0.104317  | 0.154855     | 0.002304469 |
| 11         | rs10767779 | 0.392473  | 0.462393     | 0.002304469 |
| 8          | rs1484618  | 0.398917  | 0.332936     | 0.002312786 |
| 18         | rs4940047  | 0.331541  | 0.399693     | 0.002315168 |
| 14         | rs11620775 | 0.268817  | 0.212704     | 0.002318745 |
| 22         | rs470000   | 0.556159  | 0.486676     | 0.002327114 |
| 1          | rs545621   | 0.343525  | 0.411614     | 0.002333111 |
| 5          | rs7714653  | 0.330325  | 0.267212     | 0.002340328 |
| 18         | rs7245376  | 0.541367  | 0.472535     | 0.002341533 |
| 10         | rs1891645  | 0.421147  | 0.490463     | 0.002342738 |

Table DS2: All SNPs tested for association (RDC SABP vs. controls) with the Cochran-Armitage trend test and significant at the p=0.05 threshold.

| chromosome | SNP        | MAF_cases | MAF_controls | p_value     |
|------------|------------|-----------|--------------|-------------|
| 21         | rs2837108  | 0.392473  | 0.46302      | 0.002342738 |
| 4          | rs7684130  | 0.289568  | 0.356485     | 0.002347567 |
| 4          | rs10518171 | 0.109712  | 0.0731084    | 0.002347567 |
| 4          | rs6822145  | 0.204301  | 0.264485     | 0.002348776 |
| 11         | rs3862358  | 0.390681  | 0.459666     | 0.002356042 |
| 2          | rs2078     | 0.22043   | 0.283038     | 0.002363331 |
| 18         | rs8099463  | 0.456989  | 0.390327     | 0.002364548 |
| 3          | rs1562808  | 0.365455  | 0.300546     | 0.002366984 |
| 10         | rs10824378 | 0.183453  | 0.242925     | 0.002366984 |
| 8          | rs12547764 | 0.12724   | 0.180641     | 0.002370642 |
| 4          | rs12503762 | 0.107527  | 0.0713556    | 0.002374307 |
| 2          | rs6720056  | 0.163082  | 0.117376     | 0.002377977 |
| 6          | rs2152183  | 0.364621  | 0.298974     | 0.002377977 |
| 22         | rs5759455  | 0.078853  | 0.0487013    | 0.002381653 |
| 10         | rs12263099 | 0.0251799 | 0.0558393    | 0.002382879 |
| 4          | rs4470674  | 0.360215  | 0.296593     | 0.002384106 |
| 6          | rs7743711  | 0.0539568 | 0.0934723    | 0.002385334 |
| 2          | rs2216941  | 0.163082  | 0.117337     | 0.002387792 |
| 4          | rs12648730 | 0.503584  | 0.433731     | 0.00239518  |
| 4          | rs2980089  | 0.336957  | 0.274821     | 0.002400119 |
| 2          | rs4664418  | 0.163082  | 0.117416     | 0.002401355 |
| 10         | rs2497816  | 0.109319  | 0.15968      | 0.002406307 |
| 17         | rs9894704  | 0.102518  | 0.151567     | 0.002406307 |
| 10         | rs11001604 | 0.0591398 | 0.100102     | 0.002410027 |
| 1          | rs6540458  | 0.264493  | 0.207821     | 0.00241251  |
| 5          | rs4495148  | 0.304659  | 0.245058     | 0.002413753 |
| 7          | rs17541282 | 0.139785  | 0.0977816    | 0.002414996 |
| 20         | rs3790285  | 0.283154  | 0.348738     | 0.002414996 |
| 8          | rs1402944  | 0.259857  | 0.20359      | 0.00241873  |
| 6          | rs2127022  | 0.175627  | 0.128537     | 0.002423718 |
| 5          | rs4868922  | 0.370968  | 0.307561     | 0.002427466 |
| 12         | rs11063069 | 0.259857  | 0.203072     | 0.002433725 |
| 4          | rs7696776  | 0.471326  | 0.403308     | 0.002434979 |
| 5          | rs272195   | 0.323741  | 0.262108     | 0.002434979 |
| 6          | rs9390110  | 0.403226  | 0.337197     | 0.002434979 |
| 10         | rs1228670  | 0.112903  | 0.075835     | 0.002437488 |
| 8          | rs2046223  | 0.417266  | 0.350596     | 0.002447553 |
| 8          | rs17078780 | 0.193548  | 0.144198     | 0.002448814 |
| 1          | rs859499   | 0.426259  | 0.359631     | 0.002450076 |
| 18         | rs4798023  | 0.363799  | 0.300613     | 0.002450076 |
| 7          | rs3801145  | 0.197842  | 0.257762     | 0.002451338 |
| 10         | rs11014799 | 0.0913978 | 0.0584327    | 0.002452601 |
| 14         | rs12590638 | 0.22043   | 0.167746     | 0.002452601 |
| 19         | rs2191566  | 0.326165  | 0.264916     | 0.002453865 |
| 5          | rs150543   | 0.268953  | 0.212338     | 0.002456394 |
| 9          | rs2361096  | 0.149281  | 0.106423     | 0.00245766  |
| 19         | rs12459966 | 0.143369  | 0.197785     | 0.00246908  |
| 5          | rs2269207  | 0.390681  | 0.326405     | 0.002476724 |
| 18         | rs17799849 | 0.323741  | 0.262181     | 0.002476724 |
| 16         | rs1420040  | 0.378136  | 0.447342     | 0.002479277 |
| 1          | rs2007471  | 0.294224  | 0.360988     | 0.002480555 |
| 10         | rs211385   | 0.0770609 | 0.121253     | 0.002494653 |

Table DS2: All SNPs tested for association (RDC SABP vs. controls) with the Cochran-Armitage trend test and significant at the p=0.05 threshold.

| chromosome | SNP        | MAF_cases | MAF_controls | p_value     |
|------------|------------|-----------|--------------|-------------|
| 21         | rs228050   | 0.408602  | 0.47752      | 0.002495939 |
| 18         | rs7232992  | 0.419065  | 0.488249     | 0.002501088 |
| 8          | rs17241099 | 0.388489  | 0.456744     | 0.002502377 |
| 2          | rs12618634 | 0.422939  | 0.491318     | 0.002504957 |
| 13         | rs9519431  | 0.397849  | 0.332993     | 0.002515304 |
| 11         | rs4244843  | 0.507194  | 0.438372     | 0.002521794 |
| 2          | rs12618802 | 0.236462  | 0.182794     | 0.002534823 |
| 8          | rs1038191  | 0.361511  | 0.297578     | 0.002534823 |
| 1          | rs2802835  | 0.141577  | 0.0997953    | 0.002536129 |
| 8          | rs16892637 | 0.261649  | 0.205482     | 0.002538745 |
| 5          | rs2909816  | 0.388889  | 0.457084     | 0.002545295 |
| 1          | rs2364535  | 0.286738  | 0.228109     | 0.002550548 |
| 5          | rs38059    | 0.107527  | 0.0716474    | 0.002550548 |
| 6          | rs9376756  | 0.403226  | 0.337709     | 0.002550548 |
| 6          | rs3818100  | 0.344086  | 0.282261     | 0.002554495 |
| 5          | rs272200   | 0.323741  | 0.262343     | 0.002558448 |
| 2          | rs4577234  | 0.281362  | 0.345826     | 0.002562407 |
| 15         | rs2879291  | 0.302867  | 0.370181     | 0.002566372 |
| 10         | rs2420055  | 0.19964   | 0.150188     | 0.002574322 |
| 2          | rs9808084  | 0.17446   | 0.231961     | 0.002580966 |
| 6          | rs217297   | 0.377698  | 0.447566     | 0.002590296 |
| 11         | rs10840211 | 0.196043  | 0.254601     | 0.002599661 |
| 7          | rs2237641  | 0.0842294 | 0.130279     | 0.002611751 |
| 3          | rs4928115  | 0.189964  | 0.248467     | 0.002615794 |
| 1          | rs1995229  | 0.363799  | 0.43205      | 0.002618493 |
| 20         | rs4812223  | 0.166667  | 0.222771     | 0.002625253 |
| 15         | rs10518812 | 0.139785  | 0.193224     | 0.00263203  |
| 1          | rs3121518  | 0.308244  | 0.374531     | 0.002634746 |
| 12         | rs7299940  | 0.397482  | 0.466644     | 0.002636105 |
| 7          | rs802459   | 0.299283  | 0.364985     | 0.002641548 |
| 15         | rs1020944  | 0.426523  | 0.360259     | 0.002649734 |
| 7          | rs2961258  | 0.373646  | 0.442138     | 0.0026511   |
| 12         | rs6581112  | 0.302158  | 0.243275     | 0.0026511   |
| 2          | rs934036   | 0.188172  | 0.247019     | 0.002660688 |
| 6          | rs572550   | 0.261649  | 0.205281     | 0.002663434 |
| 1          | rs12033354 | 0.399642  | 0.468165     | 0.002671689 |
| 10         | rs710930   | 0.256272  | 0.319468     | 0.002671689 |
| 14         | rs17108400 | 0.139785  | 0.0986708    | 0.002674446 |
| 14         | rs221703   | 0.0806452 | 0.0503413    | 0.002675826 |
| 3          | rs9810201  | 0.33871   | 0.276221     | 0.002685505 |
| 7          | rs10269966 | 0.290323  | 0.354828     | 0.002685505 |
| 1          | rs2038027  | 0.528777  | 0.461473     | 0.002688276 |
| 18         | rs3933772  | 0.543011  | 0.47529      | 0.002695219 |
| 15         | rs341411   | 0.430108  | 0.364055     | 0.002700786 |
| 1          | rs10923636 | 0.109319  | 0.0734039    | 0.002704969 |
| 5          | rs4272164  | 0.265233  | 0.329646     | 0.002706364 |
| 20         | rs2269036  | 0.176259  | 0.129768     | 0.002713354 |
| 12         | rs1368563  | 0.351254  | 0.288075     | 0.002714754 |
| 18         | rs698613   | 0.107527  | 0.0721843    | 0.002714754 |
| 1          | rs2020902  | 0.18705   | 0.138766     | 0.002717557 |
| 5          | rs9327748  | 0.304659  | 0.245743     | 0.002725982 |
| 10         | rs7069959  | 0.317204  | 0.256642     | 0.002733023 |

Table DS2: All SNPs tested for association (RDC SABP vs. controls) with the Cochran-Armitage trend test and significant at the p=0.05 threshold.

| chromosome | SNP           | MAF_cases | MAF_controls | p_value     |
|------------|---------------|-----------|--------------|-------------|
| 5          | rs4513721     | 0.419355  | 0.352691     | 0.002744328 |
| 7          | rs10225747    | 0.365591  | 0.302009     | 0.002751417 |
| 18         | rs13381578    | 0.460432  | 0.394647     | 0.002754258 |
| 15         | rs11631360    | 0.305755  | 0.246848     | 0.002755679 |
| 18         | rs12959881    | 0.363799  | 0.30126      | 0.002759949 |
| 3          | rs433303      | 0.469534  | 0.402281     | 0.002764225 |
| 3          | rs9864406     | 0.218638  | 0.167348     | 0.002765651 |
| 5          | rs6887208     | 0.304659  | 0.245826     | 0.002767079 |
| 1          | rs719923      | 0.275986  | 0.218739     | 0.002774228 |
| 9          | rs995988      | 0.413978  | 0.481772     | 0.002774228 |
| 1          | rs17785166    | 0.342294  | 0.409137     | 0.002778526 |
| 3          | rs4683968     | 0.348921  | 0.416695     | 0.002792903 |
| 1          | rs6669433     | 0.308244  | 0.374149     | 0.002795788 |
| 6          | rs3798867     | 0.375899  | 0.444937     | 0.002797231 |
| 2          | rs6706934     | 0.401434  | 0.469454     | 0.002803012 |
| 12         | rs1513198     | 0.551971  | 0.483822     | 0.002805907 |
| 10         | rs10885547    | 0.200717  | 0.151567     | 0.002807356 |
| 2          | rs427298      | 0.386691  | 0.453941     | 0.002808805 |
| 19         | rs8103590     | 0.446237  | 0.379993     | 0.002816064 |
| 18         | rs578786      | 0.143369  | 0.1016       | 0.002818972 |
| 4          | rs6824342     | 0.363799  | 0.301328     | 0.002827717 |
| 9          | rs4740349     | 0.455197  | 0.388965     | 0.0028321   |
| 2          | rs4670248     | 0.195341  | 0.146848     | 0.002848228 |
| 18         | rs8091228     | 0.213262  | 0.273161     | 0.00285559  |
| 4          | rs7655585     | 0.202509  | 0.15327      | 0.002857065 |
| 7          | rs2305326     | 0.326165  | 0.392942     | 0.002862971 |
| 11         | rs11825693    | 0.270609  | 0.33521      | 0.002862971 |
| 15         | rs8032120     | 0.359712  | 0.297307     | 0.00286889  |
| 6          | rs2506743     | 0.490975  | 0.423287     | 0.002880766 |
| 19         | rs6509132     | 0.309353  | 0.375        | 0.002888213 |
| 4          | rs260933      | 0.543165  | 0.47598      | 0.002889705 |
| 19         | rs7249315     | 0.0716846 | 0.114441     | 0.002891198 |
| 3          | SNP_A-2138145 | 0.172043  | 0.228435     | 0.00289568  |
| 12         | rs11110688    | 0.11828   | 0.168545     | 0.00289568  |
| 1          | rs7548768     | 0.467742  | 0.400648     | 0.002898672 |
| 6          | rs9398237     | 0.343525  | 0.28252      | 0.002910673 |
| 11         | rs7119300     | 0.195341  | 0.252903     | 0.002910673 |
| 12         | rs873908      | 0.278777  | 0.344293     | 0.002912176 |
| 7          | rs17767818    | 0.0698925 | 0.111755     | 0.002913681 |
| 11         | rs1405098     | 0.340502  | 0.278591     | 0.002916692 |
| 3          | rs7618185     | 0.340502  | 0.279236     | 0.002919706 |
| 7          | rs753336      | 0.32491   | 0.391579     | 0.002921215 |
| 15         | rs7182228     | 0.302867  | 0.369239     | 0.002921215 |
| 5          | rs466269      | 0.125448  | 0.0866598    | 0.002922724 |
| 2          | rs2099623     | 0.0945455 | 0.0609631    | 0.002925745 |
| 3          | rs2324724     | 0.34767   | 0.414934     | 0.00293331  |
| 2          | rs6436183     | 0.365108  | 0.302564     | 0.002934826 |
| 15         | rs8024679     | 0.335125  | 0.40017      | 0.002937859 |
| 2          | SNP_A-2196899 | 0.139785  | 0.193015     | 0.002960711 |
| 9          | rs16907449    | 0.0395683 | 0.0745225    | 0.002965303 |
| 3          | rs6763976     | 0.0824373 | 0.126492     | 0.002972972 |
| 7          | rs4960616     | 0.0949821 | 0.0619877    | 0.002972972 |

Table DS2: All SNPs tested for association (RDC SABP vs. controls) with the Cochran-Armitage trend test and significant at the p=0.05 threshold.

| chromosome | SNP        | MAF_cases | MAF_controls | p_value     |
|------------|------------|-----------|--------------|-------------|
| 10         | rs702371   | 0.350181  | 0.288934     | 0.002972972 |
| 2          | rs2705845  | 0.433692  | 0.368269     | 0.002977584 |
| 3          | rs10490800 | 0.120072  | 0.0824251    | 0.002985285 |
| 10         | rs3781128  | 0.526882  | 0.458461     | 0.002985285 |
| 8          | rs1382469  | 0.260791  | 0.205451     | 0.002986828 |
| 15         | rs1728891  | 0.403226  | 0.338501     | 0.002988372 |
| 4          | rs3913682  | 0.394265  | 0.33089      | 0.002999199 |
| 21         | rs2826583  | 0.175627  | 0.130331     | 0.003003852 |
| 1          | rs3122291  | 0.301075  | 0.365928     | 0.003005405 |
| 1          | rs10799701 | 0.517921  | 0.449591     | 0.003010067 |
| 20         | rs1537479  | 0.517921  | 0.450239     | 0.003016295 |
| 9          | rs7874009  | 0.0268817 | 0.0582425    | 0.003017854 |
| 19         | rs4420638  | 0.143369  | 0.197579     | 0.003020975 |
| 9          | rs10512385 | 0.0645161 | 0.106278     | 0.003025662 |
| 3          | rs11710743 | 0.223022  | 0.283135     | 0.00303349  |
| 1          | rs1582115  | 0.23741   | 0.183753     | 0.003038196 |
| 5          | rs2546724  | 0.369176  | 0.436649     | 0.003042911 |
| 7          | rs13233832 | 0.165468  | 0.221144     | 0.003047632 |
| 3          | rs4410472  | 0.216846  | 0.166099     | 0.003053939 |
| 13         | rs17337503 | 0.189964  | 0.1422       | 0.003063424 |
| 6          | rs9356167  | 0.09319   | 0.0606061    | 0.003068178 |
| 6          | rs3734773  | 0.103943  | 0.0689244    | 0.003068178 |
| 17         | rs1005369  | 0.159498  | 0.115791     | 0.003071352 |
| 9          | rs7046921  | 0.420863  | 0.355999     | 0.003076118 |
| 16         | rs11646028 | 0.278777  | 0.342672     | 0.003077709 |
| 6          | rs7763815  | 0.471326  | 0.40494      | 0.0030793   |
| 3          | rs12497321 | 0.34767   | 0.414617     | 0.003080892 |
| 5          | rs4326106  | 0.175627  | 0.129768     | 0.003087269 |
| 14         | rs7151611  | 0.185252  | 0.242584     | 0.00309206  |
| 16         | rs3891920  | 0.145683  | 0.103578     | 0.00309206  |
| 3          | rs347974   | 0.193548  | 0.144755     | 0.00309686  |
| 10         | rs12355975 | 0.105735  | 0.0706003    | 0.003100063 |
| 9          | rs11793751 | 0.0949821 | 0.142053     | 0.00310327  |
| 9          | rs7858160  | 0.188849  | 0.140763     | 0.00310327  |
| 1          | rs7536787  | 0.307554  | 0.37287      | 0.003104875 |
| 6          | rs2569854  | 0.132616  | 0.0928134    | 0.003109694 |
| 7          | rs3948710  | 0.145161  | 0.103202     | 0.003111302 |
| 12         | rs2288726  | 0.166667  | 0.222411     | 0.003112911 |
| 6          | rs2019943  | 0.46595   | 0.399148     | 0.003114521 |
| 3          | rs4549     | 0.267025  | 0.330892     | 0.003124197 |
| 3          | rs440646   | 0.458781  | 0.392979     | 0.003130665 |
| 9          | rs7030274  | 0.345878  | 0.411524     | 0.003148523 |
| 2          | rs7566090  | 0.107914  | 0.0723056    | 0.003150151 |
| 22         | rs4823413  | 0.130824  | 0.0913118    | 0.003168121 |
| 17         | rs9910565  | 0.311828  | 0.376703     | 0.0031714   |
| 6          | rs3135377  | 0.276978  | 0.220382     | 0.003174682 |
| 3          | rs7628058  | 0.52509   | 0.458262     | 0.003176324 |
| 3          | rs1486337  | 0.339928  | 0.279782     | 0.003177967 |
| 18         | rs603113   | 0.173835  | 0.229444     | 0.003184548 |
| 4          | rs7693500  | 0.394265  | 0.331233     | 0.003186196 |
| 6          | rs13198062 | 0.375899  | 0.311817     | 0.003186196 |
| 8          | rs17674240 | 0.0358423 | 0.0695297    | 0.003194446 |

Table DS2: All SNPs tested for association (RDC SABP vs. controls) with the Cochran-Armitage trend test and significant at the p=0.05 threshold.

| chromosome | SNP           | MAF_cases | MAF_controls | p_value     |
|------------|---------------|-----------|--------------|-------------|
| 10         | rs7897813     | 0.127698  | 0.0887564    | 0.003199407 |
| 1          | rs1979827     | 0.362007  | 0.428912     | 0.003204375 |
| 6          | rs217326      | 0.377698  | 0.445845     | 0.003207692 |
| 5          | rs7729142     | 0.397849  | 0.464517     | 0.003217662 |
| 6          | rs9350750     | 0.160072  | 0.116263     | 0.003217662 |
| 10         | rs10826258    | 0.115108  | 0.164108     | 0.003217662 |
| 8          | rs10089350    | 0.115108  | 0.0786958    | 0.003219327 |
| 8          | rs2333871     | 0.292115  | 0.234343     | 0.003220993 |
| 1          | rs662440      | 0.293907  | 0.358067     | 0.003229335 |
| 2          | rs10496574    | 0.0770609 | 0.11938      | 0.003229335 |
| 18         | rs2635508     | 0.0842294 | 0.0531154    | 0.003231006 |
| 10         | rs1467642     | 0.105735  | 0.0705281    | 0.003232678 |
| 4          | rs7688738     | 0.492832  | 0.425964     | 0.00323435  |
| 5          | rs9314165     | 0.419065  | 0.353222     | 0.003244405 |
| 6          | rs12197499    | 0.0681004 | 0.109939     | 0.003247764 |
| 5          | rs10085034    | 0.419355  | 0.353883     | 0.003256176 |
| 7          | rs7778027     | 0.209677  | 0.160143     | 0.003257862 |
| 17         | rs10491097    | 0.256272  | 0.319033     | 0.003257862 |
| 1          | rs493680      | 0.44964   | 0.383725     | 0.003262922 |
| 7          | rs2140615     | 0.426259  | 0.493013     | 0.003264611 |
| 18         | rs17552501    | 0.296763  | 0.239012     | 0.003276456 |
| 10         | rs10887096    | 0.158273  | 0.114899     | 0.003281546 |
| 2          | SNP_A-2301573 | 0.164875  | 0.120525     | 0.003283245 |
| 15         | rs17672041    | 0.0824373 | 0.126282     | 0.003284944 |
| 10         | rs1935933     | 0.415771  | 0.482794     | 0.003286644 |
| 1          | rs555070      | 0.419355  | 0.486542     | 0.003288346 |
| 1          | rs1710415     | 0.256272  | 0.202044     | 0.003295159 |
| 11         | rs12808148    | 0.103943  | 0.152115     | 0.003296865 |
| 2          | rs16831843    | 0.107527  | 0.0721825    | 0.003301987 |
| 3          | rs336612      | 0.40681   | 0.342375     | 0.003303696 |
| 3          | rs16842060    | 0.191336  | 0.248638     | 0.003305406 |
| 10         | rs1860082     | 0.214029  | 0.164278     | 0.003305406 |
| 10         | rs2799401     | 0.385305  | 0.322828     | 0.003308829 |
| 1          | rs233111      | 0.34767   | 0.28744      | 0.003324277 |
| 2          | rs6541775     | 0.0770609 | 0.11938      | 0.003325998 |
| 8          | rs3931281     | 0.51259   | 0.446149     | 0.003325998 |
| 4          | rs4417998     | 0.284173  | 0.22701      | 0.003332891 |
| 7          | rs879629      | 0.401434  | 0.338215     | 0.003332891 |
| 4          | rs17015513    | 0.394265  | 0.331461     | 0.003334616 |
| 5          | rs9327261     | 0.358423  | 0.297647     | 0.003334616 |
| 7          | rs7791577     | 0.27518   | 0.337939     | 0.003334616 |
| 8          | rs10958508    | 0.428315  | 0.495405     | 0.003339798 |
| 13         | rs773328      | 0.399281  | 0.336116     | 0.003339798 |
| 7          | rs12670472    | 0.318996  | 0.259196     | 0.003344988 |
| 2          | rs17666257    | 0.0913978 | 0.0591544    | 0.00334672  |
| 4          | rs6841833     | 0.0501792 | 0.087334     | 0.003360607 |
| 5          | rs11167647    | 0.426523  | 0.362274     | 0.003364089 |
| 3          | rs2034869     | 0.528674  | 0.461342     | 0.003369317 |
| 20         | rs6027514     | 0.462366  | 0.396934     | 0.003369317 |
| 6          | rs9352566     | 0.141577  | 0.10058      | 0.003376301 |
| 8          | rs6472127     | 0.53405   | 0.467269     | 0.003376301 |
| 7          | rs11761481    | 0.0685921 | 0.110164     | 0.003381549 |

Table DS2: All SNPs tested for association (RDC SABP vs. controls) with the Cochran-Armitage trend test and significant at the p=0.05 threshold.

| chromosome | SNP           | MAF_cases | MAF_controls | p_value     |
|------------|---------------|-----------|--------------|-------------|
| 11         | rs4881692     | 0.50361   | 0.43686      | 0.0033833   |
| 13         | rs2036975     | 0.132616  | 0.09375      | 0.003386805 |
| 1          | rs10803303    | 0.116487  | 0.165642     | 0.003388559 |
| 10         | rs3006675     | 0.359712  | 0.298261     | 0.003407912 |
| 10         | rs4747273     | 0.105735  | 0.154108     | 0.003411443 |
| 5          | rs1020721     | 0.189964  | 0.142541     | 0.00341321  |
| 9          | rs16919602    | 0.124101  | 0.175298     | 0.00341321  |
| 13         | rs1333099     | 0.451613  | 0.385944     | 0.00341321  |
| 16         | rs4124065     | 0.226619  | 0.175238     | 0.003414977 |
| 12         | rs11045272    | 0.442652  | 0.377387     | 0.003418516 |
| 12         | rs11111945    | 0.0878136 | 0.133049     | 0.003425603 |
| 5          | SNP_A-2297922 | 0.117754  | 0.080348     | 0.003429153 |
| 15         | rs12440325    | 0.185921  | 0.243018     | 0.003429153 |
| 12         | rs11178702    | 0.541219  | 0.475435     | 0.003430929 |
| 6          | rs2201806     | 0.489209  | 0.422264     | 0.003434484 |
| 11         | rs11041174    | 0.129032  | 0.0899796    | 0.003436263 |
| 9          | rs7860502     | 0.413978  | 0.480382     | 0.003438043 |
| 4          | SNP_A-1948755 | 0.0593525 | 0.0987402    | 0.003439824 |
| 2          | rs11122865    | 0.0770609 | 0.11891      | 0.003446956 |
| 9          | rs1547689     | 0.123656  | 0.174565     | 0.003448742 |
| 8          | rs755223      | 0.52509   | 0.458575     | 0.003454104 |
| 17         | rs11656396    | 0.0539568 | 0.0920873    | 0.003457684 |
| 3          | rs9863142     | 0.216846  | 0.16678      | 0.003459475 |
| 3          | rs9311419     | 0.0501792 | 0.0871935    | 0.003466649 |
| 7          | rs10486612    | 0.273381  | 0.335493     | 0.003466649 |
| 6          | rs217303      | 0.378136  | 0.445734     | 0.003475638 |
| 3          | rs404552      | 0.406475  | 0.342302     | 0.003477438 |
| 1          | rs10874078    | 0.419355  | 0.484998     | 0.003500933 |
| 8          | rs4440674     | 0.112903  | 0.0766871    | 0.003508194 |
| 8          | rs16884604    | 0.292115  | 0.234763     | 0.003510012 |
| 15         | rs1479524     | 0.535842  | 0.469857     | 0.003520939 |
| 19         | rs7258693     | 0.442446  | 0.378024     | 0.003524589 |
| 11         | rs10765565    | 0.344086  | 0.409727     | 0.003542896 |
| 6          | rs196454      | 0.362007  | 0.428304     | 0.003546569 |
| 6          | rs3798889     | 0.37276   | 0.309646     | 0.003553927 |
| 14         | rs2052656     | 0.18638   | 0.242765     | 0.003555769 |
| 5          | rs4869264     | 0.4319    | 0.36636      | 0.0035613   |
| 15         | rs11632145    | 0.136201  | 0.0969005    | 0.0035613   |
| 7          | rs846334      | 0.516129  | 0.449932     | 0.003564993 |
| 1          | rs11580294    | 0.254513  | 0.200751     | 0.003577947 |
| 3          | rs16842468    | 0.0395683 | 0.0734039    | 0.003581657 |
| 7          | rs39358       | 0.503597  | 0.437862     | 0.003581657 |
| 6          | rs911193      | 0.403226  | 0.468793     | 0.00358723  |
| 1          | rs11162830    | 0.418773  | 0.484487     | 0.00359095  |
| 19         | rs11672056    | 0.431655  | 0.498638     | 0.003592811 |
| 8          | rs719213      | 0.247312  | 0.194246     | 0.003594673 |
| 12         | rs7304508     | 0.229391  | 0.178754     | 0.003594673 |
| 3          | rs336611      | 0.406475  | 0.342428     | 0.003596537 |
| 1          | rs4240872     | 0.272401  | 0.217813     | 0.003600266 |
| 12         | rs2117018     | 0.392086  | 0.328285     | 0.003604    |
| 17         | rs8066371     | 0.387097  | 0.325502     | 0.003609608 |
| 20         | rs6130168     | 0.433692  | 0.369676     | 0.003609608 |

Table DS2: All SNPs tested for association (RDC SABP vs. controls) with the Cochran-Armitage trend test and significant at the p=0.05 threshold.

| chromosome | SNP           | MAF_cases | MAF_controls | p_value     |
|------------|---------------|-----------|--------------|-------------|
| 13         | rs773317      | 0.397849  | 0.335553     | 0.003611479 |
| 9          | rs12340614    | 0.18638   | 0.139986     | 0.003617098 |
| 8          | rs4282547     | 0.220217  | 0.2806       | 0.003628364 |
| 1          | rs593479      | 0.422939  | 0.489445     | 0.003630245 |
| 7          | rs846326      | 0.410394  | 0.47615      | 0.003635895 |
| 4          | rs10516352    | 0.120072  | 0.0831063    | 0.003639666 |
| 14         | rs1008924     | 0.390681  | 0.456329     | 0.003639666 |
| 3          | rs1470204     | 0.349462  | 0.415191     | 0.003643441 |
| 4          | rs4579104     | 0.207885  | 0.265689     | 0.003643441 |
| 4          | rs343849      | 0.232014  | 0.292064     | 0.003658581 |
| 6          | rs12216096    | 0.340502  | 0.405175     | 0.003658581 |
| 2          | rs6717212     | 0.0770609 | 0.118609     | 0.003662376 |
| 6          | rs10484863    | 0.124101  | 0.0868233    | 0.003664275 |
| 8          | rs731079      | 0.408273  | 0.345104     | 0.003666175 |
| 11         | rs4910747     | 0.21223   | 0.162747     | 0.00367569  |
| 12         | rs12303393    | 0.132616  | 0.18318      | 0.003683321 |
| 18         | rs755719      | 0.503584  | 0.438501     | 0.003683321 |
| 10         | rs9423709     | 0.177419  | 0.233709     | 0.003687142 |
| 5          | rs17168353    | 0.304659  | 0.247868     | 0.00369863  |
| 2          | rs1439670     | 0.062724  | 0.101975     | 0.003700548 |
| 3          | rs339707      | 0.397849  | 0.334583     | 0.003702467 |
| 6          | rs1352976     | 0.428058  | 0.363838     | 0.003702467 |
| 7          | rs12671604    | 0.327957  | 0.392881     | 0.003702467 |
| 18         | SNP_A-2217825 | 0.0896057 | 0.0580403    | 0.003708231 |
| 1          | rs4128552     | 0.415771  | 0.481942     | 0.003710154 |
| 6          | rs9459136     | 0.435484  | 0.370698     | 0.003723645 |
| 11         | rs645156      | 0.250896  | 0.198161     | 0.003723645 |
| 11         | rs540787      | 0.250896  | 0.198161     | 0.003723645 |
| 2          | rs4666111     | 0.0663082 | 0.105756     | 0.003725576 |
| 19         | rs16981648    | 0.0758123 | 0.0472374    | 0.003727508 |
| 9          | rs10122498    | 0.18705   | 0.140572     | 0.003729442 |
| 1          | rs1353866     | 0.0483871 | 0.0847255    | 0.003731376 |
| 13         | rs1333100     | 0.451613  | 0.38658      | 0.003735248 |
| 12         | rs1357682     | 0.456989  | 0.392334     | 0.003744946 |
| 6          | rs9449623     | 0.393885  | 0.329635     | 0.003748832 |
| 11         | rs11212484    | 0.181004  | 0.236277     | 0.003756617 |
| 7          | rs1978137     | 0.303957  | 0.366905     | 0.003758565 |
| 18         | rs2111922     | 0.216846  | 0.16735      | 0.003762466 |
| 1          | rs2479131     | 0.397849  | 0.462692     | 0.003782031 |
| 18         | rs17552342    | 0.295699  | 0.238931     | 0.003783993 |
| 2          | rs7586146     | 0.134409  | 0.0957338    | 0.003785956 |
| 3          | rs468513      | 0.267025  | 0.329983     | 0.00378792  |
| 12         | rs16915574    | 0.505376  | 0.439224     | 0.00378792  |
| 11         | rs2512483     | 0.25      | 0.19731      | 0.003791852 |
| 1          | rs10925372    | 0.159498  | 0.214334     | 0.003797757 |
| 3          | rs4955274     | 0.419355  | 0.48569      | 0.003797757 |
| 16         | rs11074352    | 0.231183  | 0.290729     | 0.003805645 |
| 9          | rs12352349    | 0.146953  | 0.106376     | 0.00380762  |
| 14         | rs10143447    | 0.18638   | 0.242321     | 0.003809595 |
| 7          | rs2110871     | 0.354839  | 0.295099     | 0.003811572 |
| 17         | rs4473237     | 0.0430108 | 0.0776302    | 0.003811572 |
| 5          | rs10866584    | 0.356631  | 0.296151     | 0.00381355  |



Table DS2: All SNPs tested for association (RDC SABP vs. controls) with the Cochran-Armitage trend test and significant at the p=0.05 threshold.

| chromosome | SNP        | MAF_cases | MAF_controls | p_value     |
|------------|------------|-----------|--------------|-------------|
| 5          | rs930208   | 0.0519713 | 0.0890364    | 0.003817508 |
| 6          | rs2027280  | 0.341727  | 0.405696     | 0.003817508 |
| 15         | rs17264460 | 0.163669  | 0.11985      | 0.003817508 |
| 7          | rs4731581  | 0.327957  | 0.392711     | 0.003821471 |
| 20         | rs6079791  | 0.126354  | 0.177073     | 0.003821471 |
| 12         | rs12825942 | 0.456989  | 0.392565     | 0.003827423 |
| 10         | rs10887936 | 0.349462  | 0.414879     | 0.003837364 |
| 4          | rs9884781  | 0.417563  | 0.483311     | 0.003839356 |
| 2          | rs771266   | 0.342294  | 0.282305     | 0.003843342 |
| 4          | rs6821871  | 0.320144  | 0.384537     | 0.003849328 |
| 6          | rs10457749 | 0.340502  | 0.40477      | 0.003855324 |
| 3          | rs1348213  | 0.349462  | 0.414763     | 0.003857325 |
| 6          | rs9499615  | 0.304659  | 0.368394     | 0.003859327 |
| 7          | rs4292583  | 0.206093  | 0.157284     | 0.00386133  |
| 13         | rs17572366 | 0.203237  | 0.154855     | 0.003865339 |
| 19         | rs6509133  | 0.32554   | 0.26678      | 0.003869353 |
| 6          | rs3798887  | 0.37276   | 0.31018      | 0.00387337  |
| 10         | rs211379   | 0.195341  | 0.251872     | 0.00387337  |
| 1          | rs12732460 | 0.0304659 | 0.0611168    | 0.003875381 |
| 1          | rs684382   | 0.277778  | 0.33959      | 0.003889483 |
| 3          | rs3774398  | 0.267025  | 0.32941      | 0.003893522 |
| 12         | rs7959314  | 0.138489  | 0.189779     | 0.003897565 |
| 1          | rs543633   | 0.267025  | 0.32748      | 0.003899588 |
| 6          | rs2275446  | 0.352518  | 0.292704     | 0.00390972  |
| 5          | rs30731    | 0.310036  | 0.252472     | 0.003911749 |
| 2          | rs1510088  | 0.0967742 | 0.0642906    | 0.003917844 |
| 4          | rs10008326 | 0.195341  | 0.252387     | 0.003921913 |
| 5          | rs17291699 | 0.078853  | 0.0500342    | 0.003925986 |
| 9          | rs16909065 | 0.0268817 | 0.0558974    | 0.003925986 |
| 11         | rs10898758 | 0.393885  | 0.460163     | 0.003928024 |
| 2          | rs977984   | 0.553763  | 0.487057     | 0.003936188 |
| 2          | rs939850   | 0.240072  | 0.300443     | 0.003946416 |
| 11         | rs10835397 | 0.413669  | 0.478713     | 0.003950515 |
| 15         | rs12708406 | 0.501792  | 0.436649     | 0.003950515 |
| 8          | rs12545912 | 0.296029  | 0.239101     | 0.003954619 |
| 16         | rs9941266  | 0.354317  | 0.418569     | 0.003956672 |
| 1          | rs11210119 | 0.415771  | 0.481431     | 0.003969015 |
| 6          | rs12529407 | 0.374552  | 0.311989     | 0.003973137 |
| 20         | rs879012   | 0.369176  | 0.307876     | 0.003973137 |
| 5          | rs17796864 | 0.345324  | 0.285593     | 0.00397933  |
| 2          | rs7598007  | 0.0770609 | 0.118048     | 0.003981396 |
| 1          | rs2815839  | 0.435484  | 0.371852     | 0.003983464 |
| 2          | rs16831873 | 0.188172  | 0.141301     | 0.003993817 |
| 6          | rs2799353  | 0.228417  | 0.177732     | 0.003993817 |
| 7          | rs2286105  | 0.120072  | 0.168827     | 0.003997966 |
| 14         | rs10483658 | 0.0935252 | 0.13886      | 0.003997966 |
| 15         | rs6493743  | 0.121864  | 0.170014     | 0.004000042 |
| 1          | rs754138   | 0.361511  | 0.426984     | 0.004004198 |
| 2          | rs809538   | 0.131295  | 0.0930233    | 0.004004198 |
| 5          | rs3862065  | 0.231183  | 0.291865     | 0.004012523 |
| 1          | rs538423   | 0.363309  | 0.428109     | 0.004014606 |
| 2          | rs13419936 | 0.21147   | 0.269506     | 0.004018778 |

Table DS2: All SNPs tested for association (RDC SABP vs. controls) with the Cochran-Armitage trend test and significant at the p=0.05 threshold.

| chromosome | SNP        | MAF_cases | MAF_controls | p_value     |
|------------|------------|-----------|--------------|-------------|
| 6          | rs17460940 | 0.24552   | 0.193526     | 0.004020865 |
| 2          | rs7604446  | 0.482079  | 0.417007     | 0.004027133 |
| 15         | rs2120643  | 0.100358  | 0.0668258    | 0.004029224 |
| 2          | rs9306898  | 0.107527  | 0.0727676    | 0.004039699 |
| 4          | rs6824703  | 0.355596  | 0.295866     | 0.004039699 |
| 1          | rs924297   | 0.129032  | 0.179204     | 0.004045997 |
| 11         | rs522134   | 0.256272  | 0.317501     | 0.004050201 |
| 9          | rs263645   | 0.399642  | 0.465247     | 0.004052305 |
| 13         | rs1543550  | 0.38172   | 0.320211     | 0.004052305 |
| 10         | rs211389   | 0.078853  | 0.12069      | 0.004058623 |
| 21         | rs2830144  | 0.175627  | 0.229997     | 0.004058623 |
| 6          | rs6911728  | 0.408602  | 0.473559     | 0.004071289 |
| 3          | rs1992449  | 0.308244  | 0.371594     | 0.004073404 |
| 10         | rs996229   | 0.344086  | 0.408441     | 0.004073404 |
| 8          | rs1365008  | 0.0967742 | 0.142589     | 0.004083996 |
| 10         | rs7083441  | 0.0611511 | 0.1          | 0.004083996 |
| 22         | rs175148   | 0.428315  | 0.364488     | 0.004083996 |
| 10         | rs12573117 | 0.344086  | 0.408456     | 0.004086117 |
| 2          | rs516383   | 0.154676  | 0.207226     | 0.00408824  |
| 10         | rs1998756  | 0.265233  | 0.327034     | 0.004092489 |
| 6          | rs10943930 | 0.374552  | 0.312159     | 0.004094615 |
| 6          | rs4945900  | 0.304659  | 0.368018     | 0.004098871 |
| 18         | rs4798647  | 0.200717  | 0.152967     | 0.004105263 |
| 6          | rs4708872  | 0.401434  | 0.339304     | 0.004107396 |
| 2          | rs2119289  | 0.0663082 | 0.105667     | 0.004113801 |
| 4          | rs4692266  | 0.207885  | 0.264736     | 0.004113801 |
| 20         | rs751484   | 0.281362  | 0.342536     | 0.004118077 |
| 1          | rs12035913 | 0.284173  | 0.228294     | 0.004120217 |
| 4          | rs1105138  | 0.397849  | 0.33646      | 0.004120217 |
| 14         | rs1271500  | 0.198925  | 0.151789     | 0.004120217 |
| 6          | rs7764933  | 0.304659  | 0.367973     | 0.004130932 |
| 8          | rs1882853  | 0.0917266 | 0.0602861    | 0.004135226 |
| 10         | rs10824784 | 0.344086  | 0.408379     | 0.004145981 |
| 1          | rs3737599  | 0.258065  | 0.204259     | 0.004148136 |
| 12         | rs1798079  | 0.539427  | 0.474983     | 0.004148136 |
| 11         | rs477389   | 0.250903  | 0.198502     | 0.004150291 |
| 3          | rs1457830  | 0.385305  | 0.32397      | 0.004156765 |
| 3          | rs7613095  | 0.330935  | 0.272309     | 0.004156765 |
| 6          | rs6903322  | 0.392473  | 0.329293     | 0.004158925 |
| 11         | rs184443   | 0.365591  | 0.304978     | 0.004158925 |
| 12         | rs7487188  | 0.390681  | 0.327939     | 0.004158925 |
| 10         | rs4933500  | 0.306452  | 0.369915     | 0.004161086 |
| 6          | rs3805767  | 0.09319   | 0.0615621    | 0.004167577 |
| 21         | rs9653818  | 0.0967742 | 0.141908     | 0.004167577 |
| 6          | rs7750443  | 0.372302  | 0.310092     | 0.004169743 |
| 6          | rs6940515  | 0.469534  | 0.404811     | 0.00417191  |
| 6          | rs9391078  | 0.304659  | 0.367892     | 0.004174078 |
| 1          | rs11205641 | 0.362007  | 0.426431     | 0.004176247 |
| 13         | rs6562337  | 0.179211  | 0.232776     | 0.004176247 |
| 1          | rs1780324  | 0.517986  | 0.451959     | 0.004180589 |
| 6          | rs9377543  | 0.304659  | 0.367847     | 0.004180589 |
| 11         | rs4472929  | 0.116487  | 0.163203     | 0.004180589 |

Table DS2: All SNPs tested for association (RDC SABP vs. controls) with the Cochran-Armitage trend test and significant at the p=0.05 threshold.

| chromosome | SNP        | MAF_cases | MAF_controls | p_value     |
|------------|------------|-----------|--------------|-------------|
| 18         | rs11152207 | 0.342294  | 0.406505     | 0.004184936 |
| 2          | rs720069   | 0.322581  | 0.385324     | 0.004187111 |
| 8          | rs1386687  | 0.0866426 | 0.0553663    | 0.004187111 |
| 5          | rs251550   | 0.383513  | 0.322377     | 0.004191465 |
| 14         | rs17197037 | 0.449821  | 0.385218     | 0.004195823 |
| 7          | rs17133180 | 0.363309  | 0.302488     | 0.004198003 |
| 1          | rs17376644 | 0.129032  | 0.178998     | 0.004200185 |
| 19         | rs17265697 | 0.105735  | 0.0715746    | 0.004202369 |
| 3          | rs1368515  | 0.503584  | 0.438671     | 0.004204553 |
| 5          | rs4547952  | 0.305755  | 0.248552     | 0.004208925 |
| 6          | rs197120   | 0.206835  | 0.158749     | 0.004208925 |
| 15         | rs12440538 | 0.136201  | 0.0974114    | 0.004208925 |
| 20         | rs4814376  | 0.437276  | 0.374489     | 0.004208925 |
| 17         | rs12150511 | 0.0487365 | 0.0849796    | 0.004213301 |
| 12         | rs7315229  | 0.299283  | 0.243354     | 0.004215491 |
| 16         | rs8061688  | 0.489247  | 0.425358     | 0.004215491 |
| 11         | rs736894   | 0.143369  | 0.194539     | 0.004224263 |
| 2          | rs17022452 | 0.193548  | 0.147049     | 0.004230854 |
| 11         | rs17596638 | 0.0913978 | 0.0600478    | 0.004230854 |
| 4          | rs6816158  | 0.394265  | 0.459086     | 0.004237456 |
| 6          | rs9499589  | 0.304659  | 0.367802     | 0.004237456 |
| 3          | rs11711331 | 0.388087  | 0.326746     | 0.004239658 |
| 1          | rs4844406  | 0.392086  | 0.330777     | 0.004241862 |
| 3          | rs17026472 | 0.0539568 | 0.090785     | 0.004244068 |
| 8          | rs4637895  | 0.271739  | 0.333333     | 0.004263967 |
| 10         | rs4935044  | 0.344086  | 0.408101     | 0.004263967 |
| 9          | rs2383046  | 0.323105  | 0.265237     | 0.004270621 |
| 9          | rs12350170 | 0.413978  | 0.479046     | 0.004279509 |
| 10         | rs12570523 | 0.424731  | 0.489785     | 0.00428396  |
| 6          | rs12179535 | 0.304659  | 0.367667     | 0.004286188 |
| 3          | rs1822223  | 0.0503597 | 0.0864893    | 0.004292877 |
| 1          | rs2447043  | 0.392473  | 0.457352     | 0.004299577 |
| 10         | rs10508768 | 0.121864  | 0.169843     | 0.004299577 |
| 7          | rs39353    | 0.501792  | 0.437415     | 0.004301813 |
| 6          | rs220772   | 0.401434  | 0.467143     | 0.00430405  |
| 20         | rs873523   | 0.234767  | 0.183646     | 0.004306288 |
| 3          | rs6549522  | 0.141577  | 0.192203     | 0.004317496 |
| 16         | rs8061991  | 0.260791  | 0.321976     | 0.004317496 |
| 7          | rs39363    | 0.501792  | 0.437479     | 0.004319741 |
| 10         | rs211388   | 0.078853  | 0.120225     | 0.004319741 |
| 15         | rs7171697  | 0.161232  | 0.11856      | 0.004328734 |
| 1          | rs4636500  | 0.428315  | 0.365339     | 0.004340001 |
| 9          | rs263655   | 0.496403  | 0.430541     | 0.004342259 |
| 7          | rs1639046  | 0.267025  | 0.328737     | 0.004344517 |
| 8          | rs7824253  | 0.200717  | 0.153099     | 0.004344517 |
| 4          | rs6817648  | 0.374101  | 0.313585     | 0.004353562 |
| 13         | rs4141774  | 0.0985663 | 0.0659734    | 0.004353562 |
| 10         | rs172431   | 0.195341  | 0.251108     | 0.004360358 |
| 9          | rs10976357 | 0.290323  | 0.235364     | 0.004364895 |
| 16         | rs874505   | 0.323741  | 0.387185     | 0.00437171  |
| 9          | rs7865016  | 0.455197  | 0.39209      | 0.004373984 |
| 15         | rs1899743  | 0.376344  | 0.316292     | 0.004387652 |

Table DS2: All SNPs tested for association (RDC SABP vs. controls) with the Cochran-Armitage trend test and significant at the p=0.05 threshold.

| chromosome | SNP           | MAF_cases | MAF_controls | p_value     |
|------------|---------------|-----------|--------------|-------------|
| 6          | rs9499614     | 0.304659  | 0.367497     | 0.004396789 |
| 2          | rs2911653     | 0.412186  | 0.349829     | 0.004403654 |
| 9          | rs1073123     | 0.176259  | 0.131435     | 0.004403654 |
| 1          | rs12133935    | 0.518051  | 0.452949     | 0.004412825 |
| 5          | rs270661      | 0.139785  | 0.191482     | 0.004419715 |
| 5          | rs1015976     | 0.296029  | 0.3589       | 0.004424315 |
| 2          | rs12613783    | 0.336918  | 0.278308     | 0.004431224 |
| 1          | rs16852759    | 0.133094  | 0.094452     | 0.004433529 |
| 11         | rs226109      | 0.516129  | 0.451327     | 0.004435836 |
| 8          | rs7839640     | 0.438628  | 0.37517      | 0.004442763 |
| 5          | rs7735889     | 0.316547  | 0.259114     | 0.004454333 |
| 12         | rs1290256     | 0.437276  | 0.37287      | 0.004456651 |
| 15         | rs289405      | 0.34767   | 0.287445     | 0.00445897  |
| 19         | rs10426136    | 0.444245  | 0.381512     | 0.00446129  |
| 4          | rs10461166    | 0.397482  | 0.336512     | 0.004463611 |
| 5          | rs7720380     | 0.453237  | 0.389287     | 0.004472909 |
| 10         | rs10825976    | 0.213262  | 0.270684     | 0.004472909 |
| 19         | rs1345831     | 0.304659  | 0.366803     | 0.004477565 |
| 3          | rs9876344     | 0.350719  | 0.415162     | 0.004482226 |
| 10         | rs2796780     | 0.275986  | 0.337423     | 0.004484558 |
| 3          | rs339658      | 0.281362  | 0.343334     | 0.004486892 |
| 5          | rs790829      | 0.302867  | 0.24668      | 0.004486892 |
| 2          | rs12616610    | 0.0773381 | 0.117828     | 0.004496239 |
| 15         | rs10518997    | 0.293165  | 0.238404     | 0.004496239 |
| 9          | rs10975629    | 0.419355  | 0.483992     | 0.004498579 |
| 9          | rs10989314    | 0.123656  | 0.172979     | 0.00450092  |
| 7          | rs10282699    | 0.0716846 | 0.11236      | 0.004505606 |
| 5          | rs6449937     | 0.139785  | 0.189932     | 0.004507951 |
| 2          | rs12468520    | 0.241935  | 0.301193     | 0.004510297 |
| 6          | rs532229      | 0.269784  | 0.215406     | 0.004510297 |
| 5          | rs17429180    | 0.321942  | 0.264055     | 0.004514993 |
| 7          | rs699486      | 0.532258  | 0.467984     | 0.004522046 |
| 9          | rs7873840     | 0.256272  | 0.31682      | 0.004522046 |
| 6          | rs1352029     | 0.350181  | 0.291368     | 0.004531467 |
| 4          | rs10516755    | 0.233813  | 0.292575     | 0.004538547 |
| 3          | rs10512884    | 0.172043  | 0.127939     | 0.004540909 |
| 16         | rs1833936     | 0.370504  | 0.31001      | 0.004540909 |
| 2          | rs6734194     | 0.412186  | 0.476653     | 0.004545637 |
| 1          | rs484743      | 0.530466  | 0.465259     | 0.00455748  |
| 6          | rs7763983     | 0.19964   | 0.255965     | 0.004564601 |
| 7          | rs2237421     | 0.4319    | 0.496083     | 0.004564601 |
| 19         | rs1345832     | 0.303957  | 0.366132     | 0.004564601 |
| 11         | rs6592176     | 0.308244  | 0.251447     | 0.004569354 |
| 14         | rs7158714     | 0.353047  | 0.417376     | 0.004569354 |
| 1          | rs2197783     | 0.177419  | 0.132584     | 0.004571733 |
| 12         | rs1354560     | 0.0448029 | 0.0787858    | 0.004578876 |
| 5          | rs10042348    | 0.139785  | 0.18982      | 0.00458126  |
| 10         | rs1041539     | 0.308244  | 0.370951     | 0.00458126  |
| 8          | SNP_A-1911932 | 0.170251  | 0.223339     | 0.004586031 |
| 6          | rs9296840     | 0.31362   | 0.376025     | 0.004590807 |
| 10         | rs1335713     | 0.268953  | 0.214894     | 0.004590807 |
| 13         | rs17086047    | 0.142086  | 0.10273      | 0.004600375 |

Table DS2: All SNPs tested for association (RDC SABP vs. controls) with the Cochran-Armitage trend test and significant at the p=0.05 threshold.

| chromosome | SNP        | MAF_cases | MAF_controls | p_value     |
|------------|------------|-----------|--------------|-------------|
| 15         | rs1566573  | 0.222222  | 0.280558     | 0.00460277  |
| 3          | rs2240327  | 0.532258  | 0.46778      | 0.004605166 |
| 12         | rs2127536  | 0.337545  | 0.279026     | 0.004605166 |
| 14         | rs1156651  | 0.18705   | 0.241726     | 0.004605166 |
| 10         | rs4935369  | 0.424731  | 0.489271     | 0.004617167 |
| 10         | rs17138511 | 0.0917266 | 0.135573     | 0.004634021 |
| 17         | rs11079772 | 0.258123  | 0.318569     | 0.004636434 |
| 6          | rs6928183  | 0.175627  | 0.230218     | 0.004638848 |
| 11         | rs353605   | 0.229391  | 0.288003     | 0.00464368  |
| 5          | rs2560303  | 0.15233   | 0.203779     | 0.004648518 |
| 4          | rs4690627  | 0.516187  | 0.451739     | 0.00466306  |
| 6          | rs6458572  | 0.351254  | 0.292733     | 0.00466306  |
| 7          | rs1916980  | 0.435484  | 0.49966      | 0.00466306  |
| 8          | rs297571   | 0.238351  | 0.296795     | 0.00466306  |
| 5          | rs12690623 | 0.139785  | 0.189714     | 0.004667918 |
| 13         | rs7327344  | 0.388889  | 0.32845      | 0.004670349 |
| 12         | rs10843561 | 0.460573  | 0.396763     | 0.004672781 |
| 20         | rs6112532  | 0.0304659 | 0.0611793    | 0.00467765  |
| 6          | rs7753901  | 0.264388  | 0.211289     | 0.004682523 |
| 15         | rs17671250 | 0.0884477 | 0.131534     | 0.004682523 |
| 15         | rs1904392  | 0.539427  | 0.475468     | 0.004682523 |
| 2          | rs6714869  | 0.310036  | 0.252983     | 0.004689843 |
| 1          | rs859080   | 0.163082  | 0.216207     | 0.004694729 |
| 9          | rs10993706 | 0.100719  | 0.0675077    | 0.00469962  |
| 12         | rs11173699 | 0.455197  | 0.392016     | 0.004709419 |
| 19         | rs8105151  | 0.0824373 | 0.124404     | 0.004709419 |
| 2          | rs7582192  | 0.31362   | 0.255885     | 0.004711872 |
| 2          | rs2345902  | 0.111111  | 0.0770017    | 0.004711872 |
| 5          | rs11748893 | 0.142086  | 0.102117     | 0.004714326 |
| 15         | rs11633619 | 0.278777  | 0.339237     | 0.004714326 |
| 17         | rs7218813  | 0.258065  | 0.318166     | 0.004714326 |
| 12         | rs17649306 | 0.114695  | 0.161559     | 0.004716781 |
| 6          | rs9499594  | 0.305755  | 0.368214     | 0.004721696 |
| 18         | rs17759149 | 0.22482   | 0.175187     | 0.004721696 |
| 11         | rs10768203 | 0.336918  | 0.278175     | 0.004724156 |
| 11         | rs602041   | 0.221223  | 0.17252      | 0.004726616 |
| 13         | rs9520691  | 0.28853   | 0.349693     | 0.004726616 |
| 7          | rs17137711 | 0.419355  | 0.357532     | 0.004743878 |
| 11         | rs1566732  | 0.354839  | 0.417717     | 0.004743878 |
| 2          | rs1485059  | 0.120939  | 0.0849506    | 0.004746349 |
| 11         | rs11230584 | 0.116906  | 0.16399      | 0.004748822 |
| 1          | rs6702810  | 0.306452  | 0.368475     | 0.004753771 |
| 2          | rs10497364 | 0.324373  | 0.267224     | 0.004761204 |
| 6          | rs10943933 | 0.392473  | 0.330211     | 0.004771133 |
| 7          | rs10238949 | 0.386691  | 0.450683     | 0.004771133 |
| 2          | rs10180407 | 0.134409  | 0.184542     | 0.004773619 |
| 6          | rs9386374  | 0.305755  | 0.368143     | 0.004773619 |
| 1          | rs7522239  | 0.181004  | 0.135992     | 0.004776106 |
| 19         | rs2542280  | 0.44086   | 0.378576     | 0.004776106 |
| 6          | rs2313754  | 0.12724   | 0.0899489    | 0.004778594 |
| 6          | rs9295140  | 0.256272  | 0.203716     | 0.004778594 |
| 11         | rs11221075 | 0.158845  | 0.116382     | 0.004778594 |

Table DS2: All SNPs tested for association (RDC SABP vs. controls) with the Cochran-Armitage trend test and significant at the p=0.05 threshold.

| chromosome | SNP        | MAF_cases | MAF_controls | p_value     |
|------------|------------|-----------|--------------|-------------|
| 6          | rs3128921  | 0.206093  | 0.262862     | 0.004791055 |
| 10         | rs1556401  | 0.166667  | 0.123423     | 0.004791055 |
| 1          | rs1167309  | 0.260791  | 0.32071      | 0.004801048 |
| 2          | rs2713249  | 0.0609319 | 0.0986371    | 0.004803549 |
| 6          | rs6941555  | 0.351254  | 0.292916     | 0.004806052 |
| 11         | rs7928108  | 0.272401  | 0.218771     | 0.004808556 |
| 20         | rs6132672  | 0.431655  | 0.369573     | 0.004811062 |
| 1          | rs706430   | 0.372302  | 0.436627     | 0.004816077 |
| 2          | rs1375144  | 0.275986  | 0.33663      | 0.004818586 |
| 10         | rs10824829 | 0.417563  | 0.481784     | 0.004818586 |
| 2          | rs10183157 | 0.0250896 | 0.0529733    | 0.004821097 |
| 2          | rs2345814  | 0.34767   | 0.289438     | 0.004823609 |
| 12         | rs10772690 | 0.215054  | 0.271984     | 0.004826123 |
| 1          | rs7543704  | 0.419355  | 0.483992     | 0.004831154 |
| 3          | rs1948153  | 0.528674  | 0.463909     | 0.004831154 |
| 10         | rs211390   | 0.195341  | 0.250342     | 0.004831154 |
| 3          | rs10934261 | 0.503584  | 0.439714     | 0.004841232 |
| 9          | rs4961664  | 0.329137  | 0.271224     | 0.004853859 |
| 6          | rs10457801 | 0.312274  | 0.374744     | 0.004856389 |
| 1          | rs1597171  | 0.185921  | 0.139959     | 0.00485892  |
| 2          | rs10497100 | 0.111111  | 0.0769755    | 0.00485892  |
| 7          | rs39384    | 0.5       | 0.436584     | 0.004861452 |
| 1          | rs6588561  | 0.365108  | 0.429179     | 0.004863986 |
| 1          | rs12044481 | 0.229242  | 0.178998     | 0.004863986 |
| 5          | rs724784   | 0.460573  | 0.397204     | 0.004871594 |
| 2          | rs17532259 | 0.435484  | 0.5          | 0.004874133 |
| 9          | rs1338733  | 0.125448  | 0.174617     | 0.004874133 |
| 11         | rs493151   | 0.433453  | 0.370528     | 0.004876674 |
| 5          | rs9291920  | 0.139785  | 0.189461     | 0.004879215 |
| 7          | rs4720415  | 0.433453  | 0.497275     | 0.004879215 |
| 9          | rs10810617 | 0.0430108 | 0.0759645    | 0.004884303 |
| 6          | rs1539439  | 0.374101  | 0.312884     | 0.004889395 |
| 9          | rs3829851  | 0.0286738 | 0.058623     | 0.004894494 |
| 1          | rs1179484  | 0.261649  | 0.321051     | 0.004902151 |
| 12         | rs2041381  | 0.358423  | 0.299046     | 0.004904706 |
| 15         | rs898577   | 0.0896057 | 0.0592845    | 0.004904706 |
| 2          | rs11681380 | 0.31362   | 0.256218     | 0.004909821 |
| 7          | rs12540583 | 0.132616  | 0.0939952    | 0.004909821 |
| 7          | rs12539328 | 0.250896  | 0.309646     | 0.004917502 |
| 20         | rs6015369  | 0.329137  | 0.271876     | 0.004920066 |
| 2          | rs7573890  | 0.111111  | 0.0770279    | 0.004938047 |
| 1          | rs2042369  | 0.258065  | 0.205482     | 0.004943197 |
| 1          | rs16851731 | 0.258065  | 0.205482     | 0.004943197 |
| 21         | rs2834997  | 0.413978  | 0.35201      | 0.004943197 |
| 15         | rs7175384  | 0.340502  | 0.281846     | 0.00495868  |
| 2          | rs13414823 | 0.252688  | 0.200989     | 0.004974212 |
| 13         | rs17574550 | 0.265233  | 0.212291     | 0.004974212 |
| 3          | rs7636660  | 0.421147  | 0.4855       | 0.004987193 |
| 2          | rs11123306 | 0.275986  | 0.336457     | 0.004994998 |
| 14         | rs2145449  | 0.419355  | 0.483117     | 0.004997602 |
| 22         | rs8137199  | 0.24552   | 0.305111     | 0.004997602 |
| 2          | rs13393653 | 0.34767   | 0.410221     | 0.005002816 |

Table DS2: All SNPs tested for association (RDC SABP vs. controls) with the Cochran-Armitage trend test and significant at the p=0.05 threshold.

| chromosome | SNP        | MAF_cases | MAF_controls | p_value     |
|------------|------------|-----------|--------------|-------------|
| 13         | rs9558993  | 0.487455  | 0.424429     | 0.005005424 |
| 2          | rs17012789 | 0.230216  | 0.180579     | 0.005015873 |
| 5          | rs2024055  | 0.345324  | 0.287028     | 0.005015873 |
| 19         | rs10854117 | 0.250896  | 0.310221     | 0.005018488 |
| 2          | rs4513278  | 0.253597  | 0.202044     | 0.005023724 |
| 4          | rs1955376  | 0.17446   | 0.130286     | 0.005023724 |
| 6          | rs3792930  | 0.09319   | 0.0620525    | 0.005023724 |
| 11         | rs687607   | 0.537634  | 0.473549     | 0.005023724 |
| 1          | rs1338216  | 0.31362   | 0.375298     | 0.005026343 |
| 1          | rs2797222  | 0.483871  | 0.419707     | 0.005026343 |
| 15         | rs293358   | 0.426523  | 0.49046      | 0.005028965 |
| 11         | rs658696   | 0.25      | 0.19884      | 0.005031587 |
| 10         | rs11591299 | 0.112903  | 0.0774864    | 0.005036836 |
| 19         | rs2216353  | 0.44086   | 0.378958     | 0.005047352 |
| 13         | rs9535071  | 0.241877  | 0.190395     | 0.005055253 |
| 3          | rs6779973  | 0.140288  | 0.190119     | 0.005060527 |
| 6          | rs9918342  | 0.494585  | 0.430518     | 0.005065807 |
| 12         | rs11104293 | 0.388889  | 0.327604     | 0.005065807 |
| 16         | rs9930166  | 0.0268817 | 0.0556501    | 0.005065807 |
| 18         | rs1573366  | 0.181004  | 0.234332     | 0.00506845  |
| 5          | rs9293551  | 0.424731  | 0.488931     | 0.005076384 |
| 11         | rs17599085 | 0.0863309 | 0.0564269    | 0.005081681 |
| 5          | rs176809   | 0.265233  | 0.324532     | 0.005089637 |
| 6          | rs17336166 | 0.225806  | 0.17603      | 0.005089637 |
| 7          | rs1468348  | 0.137993  | 0.187223     | 0.005089637 |
| 4          | rs10023373 | 0.114695  | 0.0801435    | 0.005092292 |
| 6          | rs8180685  | 0.317204  | 0.260988     | 0.005102925 |
| 1          | rs863969   | 0.460432  | 0.397445     | 0.005108251 |
| 12         | rs1362653  | 0.372302  | 0.312628     | 0.005108251 |
| 12         | rs11615362 | 0.250896  | 0.199626     | 0.005126933 |
| 1          | rs2595951  | 0.139785  | 0.100886     | 0.005129608 |
| 19         | rs11084585 | 0.442446  | 0.380239     | 0.005143002 |
| 2          | rs9808392  | 0.252688  | 0.201091     | 0.005145686 |
| 8          | rs2054608  | 0.357914  | 0.420389     | 0.005145686 |
| 8          | rs1995057  | 0.539427  | 0.476101     | 0.005159123 |
| 18         | rs12457004 | 0.062724  | 0.100272     | 0.005159123 |
| 12         | rs17570542 | 0.114695  | 0.161049     | 0.005161815 |
| 3          | rs9856066  | 0.551971  | 0.488079     | 0.005167202 |
| 7          | rs17768153 | 0.120072  | 0.167291     | 0.005167202 |
| 16         | rs16962268 | 0.129032  | 0.0912807    | 0.005169898 |
| 15         | rs4980343  | 0.507194  | 0.444142     | 0.005175295 |
| 21         | rs469220   | 0.177419  | 0.230664     | 0.005180697 |
| 10         | rs1227783  | 0.321942  | 0.265508     | 0.0051834   |
| 18         | rs12150846 | 0.294964  | 0.355756     | 0.0051834   |
| 10         | rs2042867  | 0.234767  | 0.183924     | 0.005205078 |
| 1          | rs172531   | 0.397849  | 0.336627     | 0.005207794 |
| 5          | rs1835959  | 0.181655  | 0.136891     | 0.005213231 |
| 11         | rs7121952  | 0.0773381 | 0.118048     | 0.005215951 |
| 5          | rs10069436 | 0.121864  | 0.0855779    | 0.005224121 |
| 11         | rs499804   | 0.249104  | 0.198332     | 0.005226848 |
| 6          | rs10485147 | 0.371377  | 0.310539     | 0.005232305 |
| 17         | rs2905877  | 0.34767   | 0.288927     | 0.005232305 |

Table DS2: All SNPs tested for association (RDC SABP vs. controls) with the Cochran-Armitage trend test and significant at the p=0.05 threshold.

| chromosome | SNP        | MAF_cases | MAF_controls | p_value     |
|------------|------------|-----------|--------------|-------------|
| 6          | rs13208108 | 0.295699  | 0.240627     | 0.005237767 |
| 3          | rs13082510 | 0.270609  | 0.217451     | 0.005243236 |
| 11         | rs763470   | 0.284173  | 0.230245     | 0.005243236 |
| 4          | rs1111986  | 0.256272  | 0.315843     | 0.005245973 |
| 7          | rs7782897  | 0.40681   | 0.345498     | 0.00524871  |
| 17         | rs4271640  | 0.272401  | 0.331744     | 0.00525145  |
| 11         | rs2175420  | 0.233813  | 0.183259     | 0.005254191 |
| 7          | rs39350    | 0.420578  | 0.359092     | 0.005256933 |
| 10         | rs2894324  | 0.184588  | 0.239012     | 0.005256933 |
| 14         | rs8016617  | 0.353047  | 0.416354     | 0.005256933 |
| 21         | rs2838486  | 0.249104  | 0.198158     | 0.005256933 |
| 20         | rs6054431  | 0.336331  | 0.279046     | 0.005259677 |
| 20         | rs8121302  | 0.302158  | 0.362752     | 0.005259677 |
| 3          | rs1827101  | 0.0519713 | 0.0877641    | 0.005265169 |
| 4          | rs6835889  | 0.311828  | 0.255873     | 0.005265169 |
| 12         | rs7972251  | 0.458781  | 0.395812     | 0.005265169 |
| 7          | rs6954281  | 0.0609319 | 0.0977149    | 0.005273418 |
| 14         | rs7144265  | 0.16129   | 0.11985      | 0.005278924 |
| 20         | rs6515590  | 0.106115  | 0.0726714    | 0.00528168  |
| 9          | rs7033592  | 0.198925  | 0.152352     | 0.005284436 |
| 10         | rs211431   | 0.469424  | 0.406505     | 0.005284436 |
| 5          | rs9291912  | 0.139493  | 0.188885     | 0.005287195 |
| 16         | rs1547991  | 0.539568  | 0.475468     | 0.005289955 |
| 17         | rs12603885 | 0.343525  | 0.284521     | 0.005292716 |
| 3          | rs1398101  | 0.232975  | 0.290201     | 0.005298243 |
| 13         | rs2312302  | 0.197842  | 0.151892     | 0.005298243 |
| 12         | rs7312241  | 0.272401  | 0.331801     | 0.005301009 |
| 10         | rs11101175 | 0.129496  | 0.09258      | 0.005303776 |
| 10         | rs10788293 | 0.501792  | 0.438053     | 0.005309315 |
| 3          | rs10212228 | 0.353047  | 0.415531     | 0.005312087 |
| 5          | rs329125   | 0.253597  | 0.201465     | 0.005312087 |
| 4          | rs10003447 | 0.301075  | 0.245829     | 0.00531486  |
| 5          | rs12153720 | 0.227599  | 0.284277     | 0.005317634 |
| 16         | rs756458   | 0.323741  | 0.266519     | 0.00532041  |
| 17         | rs8064322  | 0.326165  | 0.388283     | 0.00532041  |
| 4          | rs4241612  | 0.281362  | 0.227087     | 0.005323188 |
| 2          | rs1275925  | 0.501792  | 0.438202     | 0.005328748 |
| 5          | rs250184   | 0.4319    | 0.496256     | 0.005328748 |
| 16         | rs16969790 | 0.0268817 | 0.0552147    | 0.005334313 |
| 12         | rs7970133  | 0.498201  | 0.434923     | 0.005337098 |
| 2          | rs10495532 | 0.100358  | 0.0680575    | 0.005342672 |
| 2          | rs3732192  | 0.118705  | 0.0830491    | 0.005348253 |
| 1          | rs2595965  | 0.139785  | 0.101057     | 0.005351045 |
| 4          | rs4600976  | 0.102151  | 0.146748     | 0.005353839 |
| 12         | rs17109528 | 0.539427  | 0.476816     | 0.005356634 |
| 19         | rs4805299  | 0.304659  | 0.365496     | 0.005359431 |
| 10         | rs7918536  | 0.107527  | 0.07379      | 0.005373437 |
| 7          | rs39365    | 0.5       | 0.437266     | 0.005376243 |
| 11         | rs3850937  | 0.376344  | 0.439693     | 0.005376243 |
| 8          | rs297567   | 0.238351  | 0.295811     | 0.00537905  |
| 19         | rs6510202  | 0.44086   | 0.379387     | 0.00537905  |
| 10         | rs17128993 | 0.157706  | 0.116564     | 0.005381859 |



Table DS2 All SNPs tested for association (RDC SABP vs. controls) with the Cochran-Armitage trend test and significant at the p=0.05 threshold.

| chromosome | SNP        | MAF_cases | MAF_controls | p_value     |
|------------|------------|-----------|--------------|-------------|
| 10         | rs722979   | 0.370968  | 0.434072     | 0.005384669 |
| 1          | rs6677300  | 0.259857  | 0.318631     | 0.005387481 |
| 12         | rs1520562  | 0.317204  | 0.261166     | 0.005395925 |
| 11         | rs3862628  | 0.177419  | 0.230559     | 0.005398743 |
| 11         | rs684129   | 0.498208  | 0.434946     | 0.005404383 |
| 19         | rs1423699  | 0.304659  | 0.365463     | 0.005404383 |
| 17         | rs2953013  | 0.339928  | 0.281644     | 0.005407205 |
| 1          | rs859072   | 0.120504  | 0.167861     | 0.005412854 |
| 7          | rs10499664 | 0.405018  | 0.344016     | 0.005412854 |
| 7          | rs2529588  | 0.275986  | 0.222791     | 0.005412854 |
| 12         | rs12099807 | 0.195341  | 0.150102     | 0.005412854 |
| 1          | rs6659225  | 0.261649  | 0.320395     | 0.00542417  |
| 11         | rs10765282 | 0.376344  | 0.439585     | 0.005444032 |
| 20         | rs505714   | 0.516129  | 0.452917     | 0.005444032 |
| 2          | rs17590703 | 0.163669  | 0.121212     | 0.005446875 |
| 9          | rs2296772  | 0.0996377 | 0.0676551    | 0.005446875 |
| 8          | rs17241553 | 0.195341  | 0.149506     | 0.00544972  |
| 15         | rs11633657 | 0.280576  | 0.340034     | 0.005455414 |
| 2          | rs2421104  | 0.25      | 0.308373     | 0.005461115 |
| 7          | rs2074655  | 0.121864  | 0.168825     | 0.005461115 |
| 5          | rs11739747 | 0.369176  | 0.432777     | 0.005463967 |
| 5          | rs6895787  | 0.406137  | 0.345145     | 0.005463967 |
| 3          | rs17793957 | 0.116487  | 0.0812606    | 0.005472533 |
| 8          | rs2410528  | 0.435252  | 0.498124     | 0.005475392 |
| 1          | rs10925382 | 0.159498  | 0.211925     | 0.005478252 |
| 1          | rs1063302  | 0.0681004 | 0.107228     | 0.005481114 |
| 7          | rs3793292  | 0.275986  | 0.334867     | 0.005481114 |
| 8          | rs11992182 | 0.216846  | 0.272402     | 0.005481114 |
| 11         | rs10830468 | 0.376344  | 0.439523     | 0.005483977 |
| 9          | rs1324202  | 0.204301  | 0.157805     | 0.005486841 |
| 14         | rs6573958  | 0.181004  | 0.136503     | 0.005489708 |
| 16         | rs990051   | 0.277778  | 0.224114     | 0.005495444 |
| 2          | rs11123291 | 0.385305  | 0.448722     | 0.005504061 |
| 7          | rs10282691 | 0.136201  | 0.0981595    | 0.005504061 |
| 2          | rs16831007 | 0.107527  | 0.0743956    | 0.005506937 |
| 5          | rs872621   | 0.519713  | 0.456685     | 0.005509813 |
| 16         | rs9938426  | 0.21147   | 0.163599     | 0.005512692 |
| 5          | rs17220752 | 0.225806  | 0.177403     | 0.005518453 |
| 8          | rs7465621  | 0.159498  | 0.118358     | 0.005518453 |
| 7          | rs274637   | 0.295699  | 0.356192     | 0.005524221 |
| 16         | rs4459549  | 0.0268817 | 0.0551771    | 0.005527107 |
| 8          | rs998683   | 0.307554  | 0.252644     | 0.005529994 |
| 8          | rs10092702 | 0.247312  | 0.196866     | 0.005529994 |
| 2          | rs12151851 | 0.334532  | 0.277398     | 0.005532884 |
| 5          | rs3797896  | 0.0791367 | 0.051212     | 0.005532884 |
| 16         | rs8045712  | 0.369176  | 0.432437     | 0.005532884 |
| 4          | rs10305921 | 0.294964  | 0.240171     | 0.005538667 |
| 6          | rs9322066  | 0.315412  | 0.376663     | 0.005538667 |
| 21         | rs2835011  | 0.413669  | 0.35242      | 0.005544456 |
| 6          | rs9403732  | 0.100719  | 0.144661     | 0.005547352 |
| 16         | rs17749793 | 0.354317  | 0.417549     | 0.005558955 |
| 7          | rs17804238 | 0.25448   | 0.202827     | 0.005564766 |

Table DS2: All SNPs tested for association (RDC SABP vs. controls) with the Cochran-Armitage trend test and significant at the p=0.05 threshold.

| chromosome | SNP        | MAF_cases | MAF_controls | p_value     |
|------------|------------|-----------|--------------|-------------|
| 8          | rs4739412  | 0.131295  | 0.0938671    | 0.005567674 |
| 3          | rs6787491  | 0.0555556 | 0.0915133    | 0.00557932  |
| 11         | rs1112922  | 0.334532  | 0.277437     | 0.005582235 |
| 10         | rs2288335  | 0.0394265 | 0.0706224    | 0.005590991 |
| 8          | rs10481389 | 0.464158  | 0.401056     | 0.00559976  |
| 18         | rs4287665  | 0.43705   | 0.376491     | 0.00559976  |
| 1          | rs11161533 | 0.0448029 | 0.0776831    | 0.005602687 |
| 1          | rs1864346  | 0.277174  | 0.336119     | 0.005602687 |
| 1          | rs17534292 | 0.31362   | 0.374575     | 0.005611475 |
| 4          | rs6841799  | 0.296763  | 0.241908     | 0.005614408 |
| 5          | rs1903639  | 0.144404  | 0.104528     | 0.005620278 |
| 21         | rs523372   | 0.336331  | 0.279332     | 0.005640871 |
| 1          | rs301801   | 0.397849  | 0.337138     | 0.005643819 |
| 2          | rs2196344  | 0.215054  | 0.270606     | 0.005646769 |
| 10         | rs211267   | 0.198925  | 0.253233     | 0.005646769 |
| 16         | rs687852   | 0.340502  | 0.403204     | 0.005649721 |
| 4          | rs688808   | 0.185252  | 0.141104     | 0.005661542 |
| 8          | rs4509291  | 0.247312  | 0.197001     | 0.005664501 |
| 5          | rs315805   | 0.216846  | 0.168369     | 0.005667462 |
| 1          | rs483330   | 0.263441  | 0.322037     | 0.005673388 |
| 3          | rs1045960  | 0.462366  | 0.400375     | 0.005676354 |
| 19         | rs8106631  | 0.305755  | 0.366394     | 0.005676354 |
| 8          | rs1905526  | 0.09319   | 0.062223     | 0.005679321 |
| 1          | rs11583306 | 0.258065  | 0.206263     | 0.00568229  |
| 3          | rs854579   | 0.275986  | 0.335322     | 0.00568229  |
| 21         | rs2824050  | 0.272401  | 0.331688     | 0.005688232 |
| 11         | rs1380510  | 0.204301  | 0.157284     | 0.005691205 |
| 14         | rs238381   | 0.358423  | 0.420102     | 0.005691205 |
| 3          | rs149090   | 0.341727  | 0.403682     | 0.005700135 |
| 4          | rs218282   | 0.281362  | 0.228016     | 0.005700135 |
| 15         | rs7166991  | 0.0896057 | 0.131767     | 0.005706097 |
| 20         | rs8121908  | 0.354839  | 0.416184     | 0.005706097 |
| 1          | rs17649857 | 0.0394265 | 0.0709908    | 0.00571505  |
| 18         | rs12150848 | 0.247312  | 0.305073     | 0.00571505  |
| 11         | rs4756301  | 0.334532  | 0.27702      | 0.005718038 |
| 11         | rs1060542  | 0.0268817 | 0.0547035    | 0.005718038 |
| 12         | rs12300841 | 0.454874  | 0.393076     | 0.005718038 |
| 12         | rs11178364 | 0.15233   | 0.111963     | 0.005718038 |
| 18         | rs9961426  | 0.397112  | 0.337023     | 0.005718038 |
| 6          | rs9393948  | 0.173835  | 0.131139     | 0.005721028 |
| 11         | rs670418   | 0.498195  | 0.435198     | 0.005721028 |
| 20         | rs1998115  | 0.283154  | 0.342025     | 0.005741998 |
| 1          | rs1341712  | 0.257194  | 0.20501      | 0.005745    |
| 16         | rs12597579 | 0.0268817 | 0.0552335    | 0.005751009 |
| 6          | rs12191972 | 0.141577  | 0.190971     | 0.005754016 |
| 5          | rs4705179  | 0.321942  | 0.265497     | 0.005757025 |
| 8          | rs2430816  | 0.132616  | 0.180797     | 0.005757025 |
| 3          | rs4635691  | 0.0519713 | 0.0871716    | 0.005760035 |
| 4          | rs2320566  | 0.311828  | 0.256397     | 0.005763047 |
| 6          | rs7738739  | 0.125448  | 0.0890971    | 0.005778129 |
| 11         | rs1800532  | 0.435252  | 0.374233     | 0.005781151 |
| 10         | rs211387   | 0.197842  | 0.25196      | 0.005790225 |

Table DS2: All SNPs tested for association (RDC SABP vs. controls) with the Cochran-Armitage trend test and significant at the p=0.05 threshold.

| chromosome | SNP        | MAF_cases | MAF_controls | p_value     |
|------------|------------|-----------|--------------|-------------|
| 1          | rs2802829  | 0.139785  | 0.101328     | 0.005796282 |
| 5          | rs4422492  | 0.138489  | 0.186903     | 0.005796282 |
| 10         | rs211254   | 0.198925  | 0.253065     | 0.005802346 |
| 13         | rs9518239  | 0.34767   | 0.289617     | 0.005802346 |
| 3          | rs9826951  | 0.151079  | 0.201635     | 0.00580538  |
| 1          | rs4655020  | 0.366906  | 0.429789     | 0.005808416 |
| 11         | rs2432703  | 0.517986  | 0.454964     | 0.005808416 |
| 6          | rs3021344  | 0.473118  | 0.410252     | 0.005811454 |
| 7          | rs17161104 | 0.0716846 | 0.110903     | 0.005817534 |
| 14         | rs4982689  | 0.364621  | 0.306133     | 0.005817534 |
| 7          | rs17161086 | 0.0716846 | 0.111035     | 0.00582362  |
| 10         | rs9421740  | 0.189964  | 0.144876     | 0.005826666 |
| 13         | rs7994817  | 0.383513  | 0.32374      | 0.005829713 |
| 1          | rs354168   | 0.308244  | 0.368735     | 0.005832762 |
| 1          | rs12402451 | 0.435252  | 0.374744     | 0.005841919 |
| 3          | rs10934876 | 0.0752688 | 0.114913     | 0.005841919 |
| 3          | rs6784312  | 0.435484  | 0.498127     | 0.005848031 |
| 12         | rs11046737 | 0.0537634 | 0.0887866    | 0.00585109  |
| 6          | rs6456190  | 0.195341  | 0.150171     | 0.00585415  |
| 17         | rs9905702  | 0.462366  | 0.400649     | 0.005857212 |
| 20         | rs6063880  | 0.150538  | 0.11096      | 0.005857212 |
| 2          | rs4849270  | 0.289568  | 0.235605     | 0.005860276 |
| 5          | rs6873504  | 0.421147  | 0.359721     | 0.005863341 |
| 20         | rs6013531  | 0.150538  | 0.111073     | 0.005863341 |
| 5          | rs1421681  | 0.324373  | 0.38531      | 0.005866408 |
| 12         | rs6486740  | 0.383513  | 0.3239       | 0.005866408 |
| 1          | rs1343161  | 0.261649  | 0.319857     | 0.005869477 |
| 1          | rs241472   | 0.260791  | 0.319098     | 0.005875619 |
| 11         | rs4757741  | 0.405018  | 0.466838     | 0.005875619 |
| 15         | rs12440680 | 0.521505  | 0.458589     | 0.005875619 |
| 6          | rs4382269  | 0.401434  | 0.340716     | 0.005887922 |
| 21         | rs760062   | 0.413669  | 0.352811     | 0.005897167 |
| 8          | rs10091527 | 0.286738  | 0.232982     | 0.005900252 |
| 5          | rs2895647  | 0.343525  | 0.286421     | 0.005909517 |
| 8          | rs10492294 | 0.270609  | 0.218452     | 0.005909517 |
| 20         | rs7273511  | 0.297491  | 0.243703     | 0.005909517 |
| 8          | rs3931280  | 0.517921  | 0.455631     | 0.005912608 |
| 10         | rs10508975 | 0.337545  | 0.399387     | 0.005915701 |
| 2          | rs7567967  | 0.315412  | 0.259973     | 0.005921893 |
| 5          | rs245243   | 0.330935  | 0.39203      | 0.005924991 |
| 20         | rs6079012  | 0.34767   | 0.290471     | 0.005931192 |
| 1          | rs1338214  | 0.26259   | 0.320845     | 0.005934295 |
| 7          | rs1722361  | 0.25448   | 0.311947     | 0.005934295 |
| 12         | rs10770581 | 0.412186  | 0.474634     | 0.005934295 |
| 16         | rs9929092  | 0.44086   | 0.504937     | 0.005934295 |
| 3          | rs2169820  | 0.281362  | 0.228283     | 0.0059374   |
| 18         | rs10502620 | 0.208633  | 0.264696     | 0.0059374   |
| 10         | rs17537423 | 0.268953  | 0.216087     | 0.005940506 |
| 7          | rs10954234 | 0.329137  | 0.391052     | 0.005949835 |
| 2          | rs2043768  | 0.435484  | 0.498464     | 0.005952948 |
| 3          | rs17007269 | 0.295699  | 0.241996     | 0.005952948 |
| 18         | rs584087   | 0.429856  | 0.369336     | 0.005952948 |

Table DS2: All SNPs tested for association (RDC SABP vs. controls) with the Cochran-Armitage trend test and significant at the p=0.05 threshold.

| chromosome | SNP        | MAF_cases | MAF_controls | p_value     |
|------------|------------|-----------|--------------|-------------|
| 18         | rs8083614  | 0.17148   | 0.223527     | 0.005965417 |
| 1          | rs1891667  | 0.261649  | 0.319714     | 0.005971662 |
| 3          | rs7631421  | 0.355596  | 0.296625     | 0.00598417  |
| 4          | rs5333     | 0.295699  | 0.241403     | 0.00598417  |
| 5          | rs1427941  | 0.15942   | 0.210437     | 0.00598417  |
| 1          | rs10791    | 0.0394265 | 0.0710634    | 0.005987302 |
| 3          | rs17020402 | 0.195341  | 0.249319     | 0.005987302 |
| 10         | rs7094601  | 0.404676  | 0.46711      | 0.005987302 |
| 3          | rs1464791  | 0.394265  | 0.335266     | 0.00599357  |
| 6          | rs558825   | 0.44964   | 0.387752     | 0.006009268 |
| 7          | rs17321820 | 0.127698  | 0.091715     | 0.006009268 |
| 4          | rs7655016  | 0.322581  | 0.383174     | 0.006021857 |
| 6          | rs4279411  | 0.426523  | 0.489779     | 0.006021857 |
| 1          | rs12132569 | 0.0791367 | 0.050937     | 0.006025009 |
| 6          | rs17085430 | 0.256318  | 0.205842     | 0.006025009 |
| 2          | rs7603606  | 0.09319   | 0.136224     | 0.006031317 |
| 6          | rs9365729  | 0.494624  | 0.432004     | 0.006040792 |
| 5          | rs12188581 | 0.344086  | 0.287201     | 0.006043953 |
| 15         | rs2929637  | 0.172662  | 0.129302     | 0.006043953 |
| 2          | rs13006150 | 0.219424  | 0.275962     | 0.006050282 |
| 5          | rs11954297 | 0.320789  | 0.264836     | 0.006053448 |
| 6          | rs6937193  | 0.371841  | 0.312053     | 0.006053448 |
| 5          | rs1432642  | 0.302867  | 0.248637     | 0.006056617 |
| 12         | rs10876654 | 0.138989  | 0.187244     | 0.006059787 |
| 4          | rs10013957 | 0.293907  | 0.2397       | 0.006062958 |
| 11         | rs1612635  | 0.31362   | 0.374575     | 0.006066132 |
| 5          | rs245161   | 0.288809  | 0.235344     | 0.006069307 |
| 14         | rs4900107  | 0.216846  | 0.168937     | 0.006072484 |
| 1          | rs6429753  | 0.284173  | 0.231058     | 0.006082024 |
| 3          | rs6548773  | 0.385305  | 0.326687     | 0.006082024 |
| 17         | rs4796759  | 0.197133  | 0.151856     | 0.006085208 |
| 11         | rs2067022  | 0.154122  | 0.11359      | 0.006094769 |
| 11         | rs532876   | 0.131295  | 0.178766     | 0.006110738 |
| 10         | rs181673   | 0.519713  | 0.458106     | 0.006113937 |
| 9          | rs719724   | 0.37276   | 0.434219     | 0.00612675  |
| 8          | rs4736753  | 0.404332  | 0.467643     | 0.006133167 |
| 11         | rs226165   | 0.5       | 0.437649     | 0.006133167 |
| 2          | rs11124754 | 0.0448029 | 0.0776186    | 0.006139591 |
| 7          | rs274621   | 0.286738  | 0.346049     | 0.006146021 |
| 15         | rs1479520  | 0.537906  | 0.475793     | 0.006146021 |
| 16         | rs16959914 | 0.0395683 | 0.0704297    | 0.006152459 |
| 1          | rs11247612 | 0.431655  | 0.371633     | 0.00615568  |
| 18         | rs12457153 | 0.181004  | 0.23297      | 0.006158903 |
| 14         | rs6572681  | 0.284173  | 0.343729     | 0.006162128 |
| 1          | rs2009112  | 0.473022  | 0.411384     | 0.006165354 |
| 15         | rs7496790  | 0.535842  | 0.473783     | 0.006165354 |
| 5          | rs10491334 | 0.253597  | 0.202689     | 0.006171812 |
| 4          | rs17277345 | 0.448029  | 0.386789     | 0.006187987 |
| 11         | rs11222220 | 0.105735  | 0.0727428    | 0.006191227 |
| 3          | rs6443856  | 0.134409  | 0.0971039    | 0.006197713 |
| 8          | rs4737886  | 0.302158  | 0.361593     | 0.006200959 |
| 6          | rs161712   | 0.412186  | 0.351688     | 0.006207455 |

Table DS2: All SNPs tested for association (RDC SABP vs. controls) with the Cochran-Armitage trend test and significant at the p=0.05 threshold.

| chromosome | SNP           | MAF_cases | MAF_controls | p_value     |
|------------|---------------|-----------|--------------|-------------|
| 6          | rs9388649     | 0.125448  | 0.0893769    | 0.006210705 |
| 3          | rs2653386     | 0.177419  | 0.229472     | 0.006213958 |
| 11         | rs10893895    | 0.317204  | 0.262018     | 0.006217212 |
| 5          | rs12519725    | 0.369176  | 0.311967     | 0.006223725 |
| 5          | rs1864205     | 0.411871  | 0.351858     | 0.006223725 |
| 1          | rs11206480    | 0.370504  | 0.432709     | 0.006230246 |
| 4          | rs13117506    | 0.229391  | 0.284985     | 0.006230246 |
| 3          | rs17007274    | 0.295699  | 0.242326     | 0.006236773 |
| 5          | rs17428570    | 0.344086  | 0.287368     | 0.006240039 |
| 5          | rs11949751    | 0.31362   | 0.258609     | 0.006243307 |
| 12         | rs10506968    | 0.206835  | 0.160252     | 0.006243307 |
| 2          | rs2361743     | 0.489247  | 0.426355     | 0.006246577 |
| 6          | rs564461      | 0.541219  | 0.47855      | 0.006259674 |
| 3          | rs4858292     | 0.330935  | 0.391408     | 0.006262953 |
| 6          | rs6569535     | 0.125448  | 0.0894074    | 0.006262953 |
| 5          | rs6893920     | 0.272563  | 0.220362     | 0.006266233 |
| 16         | rs8050334     | 0.487455  | 0.425623     | 0.006266233 |
| 4          | rs17827110    | 0.388889  | 0.330494     | 0.006269515 |
| 5          | rs301078      | 0.379928  | 0.321696     | 0.006269515 |
| 5          | rs17502345    | 0.320789  | 0.264997     | 0.006272799 |
| 4          | rs10031554    | 0.125899  | 0.0896387    | 0.006276084 |
| 22         | rs9606478     | 0.21147   | 0.265918     | 0.006276084 |
| 10         | rs12784493    | 0.143369  | 0.104699     | 0.006282661 |
| 18         | rs7242468     | 0.100719  | 0.143344     | 0.006285952 |
| 1          | rs11164988    | 0.078853  | 0.050937     | 0.006292539 |
| 5          | rs979028      | 0.492806  | 0.430499     | 0.006292539 |
| 19         | rs10401545    | 0.242806  | 0.299523     | 0.006295835 |
| 4          | rs17615499    | 0.107527  | 0.074276     | 0.006299133 |
| 10         | rs1903996     | 0.530466  | 0.467632     | 0.006299133 |
| 10         | rs11188256    | 0.277778  | 0.225273     | 0.006299133 |
| 14         | rs17105872    | 0.154676  | 0.205041     | 0.006299133 |
| 5          | SNP_A-2291587 | 0.344086  | 0.28744      | 0.006302432 |
| 7          | rs7785316     | 0.110108  | 0.155548     | 0.006305734 |
| 4          | rs5334        | 0.295699  | 0.241738     | 0.006309037 |
| 17         | rs242928      | 0.379496  | 0.441247     | 0.006309037 |
| 12         | rs7295130     | 0.317204  | 0.262091     | 0.006315648 |
| 1          | rs17402685    | 0.367384  | 0.42952      | 0.006318957 |
| 1          | rs1531088     | 0.496403  | 0.434627     | 0.006318957 |
| 5          | rs11957907    | 0.320789  | 0.265066     | 0.006325579 |
| 1          | rs11583187    | 0.148746  | 0.109615     | 0.006328893 |
| 5          | rs17492851    | 0.344086  | 0.287466     | 0.006332209 |
| 6          | rs13209689    | 0.369176  | 0.311542     | 0.006332209 |
| 6          | rs6919939     | 0.379496  | 0.321197     | 0.006332209 |
| 8          | rs17255646    | 0.292115  | 0.23833      | 0.006342166 |
| 9          | rs2417911     | 0.0663082 | 0.104223     | 0.006342166 |
| 1          | rs1146579     | 0.284946  | 0.344123     | 0.006348813 |
| 11         | rs867272      | 0.311828  | 0.372402     | 0.006348813 |
| 12         | rs7311500     | 0.317204  | 0.262172     | 0.006348813 |
| 16         | rs1871260     | 0.332734  | 0.27615      | 0.006355467 |
| 18         | rs470889      | 0.181004  | 0.232776     | 0.006362129 |
| 12         | rs1400061     | 0.317204  | 0.262189     | 0.006378813 |
| 9          | rs11792896    | 0.0967742 | 0.0652768    | 0.006392193 |

Table DS2: All SNPs tested for association (RDC SABP vs. controls) with the Cochran-Armitage trend test and significant at the p=0.05 threshold.

| chromosome | SNP        | MAF_cases | MAF_controls | p_value     |
|------------|------------|-----------|--------------|-------------|
| 20         | rs6022099  | 0.148746  | 0.109935     | 0.006395542 |
| 3          | rs6794277  | 0.176895  | 0.229181     | 0.006402247 |
| 12         | rs3847888  | 0.0949821 | 0.137215     | 0.006405601 |
| 2          | rs7592357  | 0.275986  | 0.224038     | 0.006408958 |
| 4          | rs9291683  | 0.539427  | 0.476994     | 0.006408958 |
| 13         | rs9528055  | 0.383513  | 0.324361     | 0.006415677 |
| 19         | rs2645161  | 0.438849  | 0.378618     | 0.006415677 |
| 2          | rs12693320 | 0.345878  | 0.289608     | 0.006419039 |
| 8          | rs17330028 | 0.363799  | 0.306199     | 0.006419039 |
| 7          | rs7804577  | 0.0734767 | 0.112057     | 0.006422402 |
| 19         | rs1634467  | 0.252688  | 0.202113     | 0.006422402 |
| 15         | rs12442622 | 0.411871  | 0.351858     | 0.006435875 |
| 3          | rs10433582 | 0.0557554 | 0.0911104    | 0.006442623 |
| 18         | rs13380948 | 0.463899  | 0.401874     | 0.006449377 |
| 3          | rs1350350  | 0.0448029 | 0.0768575    | 0.006452757 |
| 14         | rs17112978 | 0.277778  | 0.224625     | 0.006452757 |
| 2          | rs2374341  | 0.305755  | 0.365654     | 0.006459523 |
| 9          | rs7859095  | 0.197842  | 0.152404     | 0.006466296 |
| 14         | rs6572458  | 0.385305  | 0.326635     | 0.006466296 |
| 6          | rs9388650  | 0.125448  | 0.0895293    | 0.006469685 |
| 1          | rs11210180 | 0.543011  | 0.480389     | 0.006486657 |
| 1          | rs2590681  | 0.170251  | 0.128065     | 0.006486657 |
| 8          | rs17437164 | 0.516187  | 0.454577     | 0.006486657 |
| 19         | rs7408169  | 0.365591  | 0.307311     | 0.006486657 |
| 12         | rs2582332  | 0.345878  | 0.407218     | 0.006490057 |
| 17         | rs4578727  | 0.471326  | 0.409462     | 0.006490057 |
| 2          | rs6741692  | 0.26259   | 0.320491     | 0.006496863 |
| 5          | rs17574527 | 0.250903  | 0.200922     | 0.006496863 |
| 16         | rs16941866 | 0.198925  | 0.153767     | 0.006496863 |
| 3          | rs17029872 | 0.0557554 | 0.0911414    | 0.006503675 |
| 9          | rs2381933  | 0.422662  | 0.484998     | 0.006507084 |
| 16         | rs16943239 | 0.213262  | 0.16644      | 0.006507084 |
| 7          | rs1357655  | 0.297491  | 0.356437     | 0.006510495 |
| 1          | rs6603923  | 0.188849  | 0.14493      | 0.006517322 |
| 7          | rs17132833 | 0.19964   | 0.154292     | 0.006517322 |
| 2          | rs17269487 | 0.46223   | 0.400749     | 0.006520739 |
| 5          | rs1553543  | 0.184588  | 0.140886     | 0.006520739 |
| 3          | rs3936575  | 0.204301  | 0.258174     | 0.006524157 |
| 11         | rs4753025  | 0.376344  | 0.438141     | 0.006527577 |
| 18         | rs4891960  | 0.0860215 | 0.126362     | 0.006544705 |
| 6          | rs926557   | 0.374552  | 0.316247     | 0.006548136 |
| 9          | rs9298749  | 0.444444  | 0.384117     | 0.006548136 |
| 13         | rs9603597  | 0.18638   | 0.238938     | 0.006551569 |
| 5          | rs13153675 | 0.34296   | 0.286567     | 0.00655844  |
| 4          | rs6835095  | 0.440647  | 0.379134     | 0.006561878 |
| 4          | rs3756022  | 0.295699  | 0.24199      | 0.006561878 |
| 11         | rs226163   | 0.5       | 0.43816      | 0.006561878 |
| 5          | rs711413   | 0.204301  | 0.258092     | 0.006565318 |
| 3          | rs2671751  | 0.159498  | 0.210051     | 0.00656876  |
| 2          | rs4662794  | 0.0609319 | 0.0969336    | 0.006572204 |
| 16         | rs2550692  | 0.292115  | 0.351107     | 0.00657565  |
| 17         | rs2952991  | 0.348921  | 0.291411     | 0.00657565  |

Table DS2: All SNPs tested for association (RDC SABP vs. controls) with the Cochran-Armitage trend test and significant at the p=0.05 threshold.

| chromosome | SNP        | MAF_cases | MAF_controls | p_value     |
|------------|------------|-----------|--------------|-------------|
| 6          | rs7738055  | 0.439068  | 0.500511     | 0.006579098 |
| 11         | rs7118913  | 0.505376  | 0.44348      | 0.006582547 |
| 5          | rs1946187  | 0.324373  | 0.384537     | 0.006589452 |
| 6          | rs9402055  | 0.125448  | 0.0895472    | 0.006589452 |
| 4          | rs12108497 | 0.221223  | 0.277002     | 0.006592907 |
| 5          | rs4443377  | 0.139785  | 0.187543     | 0.006592907 |
| 10         | rs725328   | 0.182796  | 0.138766     | 0.006599822 |
| 8          | rs10087333 | 0.315412  | 0.375213     | 0.006606745 |
| 7          | rs1385706  | 0.0913978 | 0.132368     | 0.006610209 |
| 1          | rs1694419  | 0.284946  | 0.343835     | 0.006613675 |
| 7          | rs10899741 | 0.388889  | 0.450426     | 0.006624085 |
| 2          | rs6751349  | 0.104317  | 0.148312     | 0.006641471 |
| 8          | rs11780783 | 0.40681   | 0.468495     | 0.006644954 |
| 12         | rs1400060  | 0.317204  | 0.262432     | 0.006644954 |
| 3          | rs253878   | 0.0412186 | 0.0726714    | 0.006648438 |
| 17         | rs16959857 | 0.236559  | 0.188139     | 0.006648438 |
| 11         | rs549683   | 0.132616  | 0.179618     | 0.006651925 |
| 14         | rs6572457  | 0.385305  | 0.326805     | 0.006655413 |
| 3          | rs3821548  | 0.388889  | 0.330662     | 0.006658904 |
| 6          | rs4142502  | 0.351254  | 0.411384     | 0.006658904 |
| 10         | rs17335189 | 0.109319  | 0.0759537    | 0.006658904 |
| 1          | rs1748035  | 0.369176  | 0.311649     | 0.006662396 |
| 5          | rs17732475 | 0.397482  | 0.458958     | 0.006669386 |
| 2          | rs7577431  | 0.0935252 | 0.136147     | 0.006672884 |
| 14         | rs4902778  | 0.505376  | 0.444482     | 0.006672884 |
| 3          | rs4855383  | 0.362007  | 0.422737     | 0.006676383 |
| 1          | rs10911598 | 0.0845324 | 0.124872     | 0.006683388 |
| 1          | rs214321   | 0.440647  | 0.379939     | 0.006690401 |
| 8          | rs1439150  | 0.12724   | 0.0912496    | 0.006700933 |
| 10         | rs2058312  | 0.333333  | 0.278043     | 0.006700933 |
| 1          | rs7527364  | 0.263441  | 0.320954     | 0.006704448 |
| 1          | rs2185384  | 0.198925  | 0.154344     | 0.006715003 |
| 5          | rs12187913 | 0.344086  | 0.287858     | 0.006715003 |
| 20         | rs4814230  | 0.34767   | 0.291213     | 0.00672205  |
| 1          | rs4926831  | 0.365108  | 0.42621      | 0.006729104 |
| 7          | rs6461547  | 0.224014  | 0.279236     | 0.006729104 |
| 16         | rs9934375  | 0.105072  | 0.0724514    | 0.006729104 |
| 3          | rs844540   | 0.383094  | 0.32368      | 0.006736165 |
| 13         | rs9526149  | 0.270609  | 0.328557     | 0.006750311 |
| 1          | rs4609415  | 0.448029  | 0.387504     | 0.006753852 |
| 7          | rs2711093  | 0.33871   | 0.28272      | 0.006757395 |
| 1          | rs11247613 | 0.431408  | 0.37193      | 0.00676094  |
| 14         | rs12432214 | 0.148746  | 0.110184     | 0.006764487 |
| 18         | rs9807727  | 0.227599  | 0.283816     | 0.006768035 |
| 4          | rs17304841 | 0.259857  | 0.316973     | 0.006782249 |
| 3          | rs2374752  | 0.311828  | 0.371594     | 0.006785807 |
| 4          | rs9996171  | 0.410072  | 0.351379     | 0.00680006  |
| 22         | rs6006905  | 0.127698  | 0.091715     | 0.00680006  |
| 1          | rs7544674  | 0.184588  | 0.140545     | 0.006810769 |
| 4          | rs1435499  | 0.433692  | 0.494376     | 0.006810769 |
| 19         | rs733101   | 0.112903  | 0.0794408    | 0.006810769 |
| 5          | rs12716476 | 0.275986  | 0.333901     | 0.006814342 |

Table DS2: All SNPs tested for association (RDC SABP vs. controls) with the Cochran-Armitage trend test and significant at the p=0.05 threshold.

| chromosome | SNP           | MAF_cases | MAF_controls | p_value     |
|------------|---------------|-----------|--------------|-------------|
| 8          | rs11784580    | 0.27518   | 0.333901     | 0.006817918 |
| 12         | rs2417862     | 0.322581  | 0.267553     | 0.006817918 |
| 12         | rs1587740     | 0.458781  | 0.39782      | 0.006821495 |
| 18         | rs12458632    | 0.0917266 | 0.0613288    | 0.006821495 |
| 5          | rs12654624    | 0.411552  | 0.35194      | 0.006828655 |
| 13         | rs9513831     | 0.351254  | 0.294308     | 0.006828655 |
| 2          | rs11693975    | 0.0899281 | 0.131086     | 0.006832239 |
| 2          | rs2141309     | 0.136201  | 0.184202     | 0.006832239 |
| 7          | rs11976158    | 0.448029  | 0.388283     | 0.006832239 |
| 1          | rs1185222     | 0.263441  | 0.320832     | 0.006835824 |
| 4          | rs4571397     | 0.444245  | 0.383527     | 0.006839411 |
| 4          | rs3955261     | 0.256272  | 0.205662     | 0.006839411 |
| 7          | rs1859226     | 0.34767   | 0.406953     | 0.006839411 |
| 18         | rs12185318    | 0.43705   | 0.377982     | 0.00684659  |
| 11         | rs10769315    | 0.156475  | 0.205622     | 0.006860973 |
| 19         | rs2867574     | 0.436823  | 0.37713      | 0.006860973 |
| 4          | rs1554472     | 0.526882  | 0.465406     | 0.006875386 |
| 4          | rs7678177     | 0.244604  | 0.194823     | 0.006878994 |
| 6          | rs4469340     | 0.150538  | 0.199183     | 0.006878994 |
| 19         | rs10409299    | 0.143885  | 0.192714     | 0.006882604 |
| 9          | rs16914332    | 0.122302  | 0.0866008    | 0.006886216 |
| 6          | rs11752805    | 0.426523  | 0.488764     | 0.00688983  |
| 5          | rs1446038     | 0.422939  | 0.36376      | 0.006897064 |
| 1          | rs7553758     | 0.460573  | 0.400749     | 0.006900684 |
| 3          | rs4685052     | 0.37276   | 0.315288     | 0.006900684 |
| 11         | rs7927911     | 0.269784  | 0.218473     | 0.006900684 |
| 2          | rs10202023    | 0.0896057 | 0.130286     | 0.006907929 |
| 7          | rs12703395    | 0.15704   | 0.206103     | 0.006907929 |
| 8          | rs7846610     | 0.348921  | 0.292704     | 0.006907929 |
| 5          | rs151873      | 0.0770609 | 0.0498808    | 0.006911555 |
| 2          | rs4853247     | 0.236559  | 0.187947     | 0.006915182 |
| 6          | SNP_A-1988283 | 0.272401  | 0.220423     | 0.006915182 |
| 15         | rs10851710    | 0.234767  | 0.291042     | 0.006915182 |
| 5          | rs6885850     | 0.0595668 | 0.0948569    | 0.006918812 |
| 5          | rs1211159     | 0.150538  | 0.199251     | 0.006918812 |
| 14         | rs2285883     | 0.156475  | 0.206403     | 0.006918812 |
| 1          | rs10798912    | 0.245487  | 0.195526     | 0.006926077 |
| 4          | rs7679575     | 0.311828  | 0.257586     | 0.006926077 |
| 8          | rs2062947     | 0.143369  | 0.191508     | 0.006926077 |
| 15         | rs1561807     | 0.0917266 | 0.0617116    | 0.006926077 |
| 6          | rs2506754     | 0.0985663 | 0.0672684    | 0.006929712 |
| 6          | rs2070699     | 0.52518   | 0.463215     | 0.006936988 |
| 5          | SNP_A-1983873 | 0.343525  | 0.287394     | 0.006944273 |
| 12         | rs11173462    | 0.213262  | 0.16678      | 0.006944273 |
| 2          | rs4668002     | 0.307554  | 0.25332      | 0.006947918 |
| 20         | rs11086404    | 0.150538  | 0.111755     | 0.006955214 |
| 2          | rs6742888     | 0.249104  | 0.305215     | 0.006966173 |
| 2          | rs13035911    | 0.105735  | 0.0732788    | 0.006966173 |
| 1          | rs6426314     | 0.0734767 | 0.111357     | 0.006969829 |
| 8          | rs4486185     | 0.508961  | 0.447037     | 0.006969829 |
| 5          | rs1350900     | 0.143885  | 0.10477      | 0.006973488 |
| 18         | rs1105290     | 0.146953  | 0.108251     | 0.006973488 |



Table DS2: All SNPs tested for association (RDC SABP vs. controls) with the Cochran-Armitage trend test and significant at the p=0.05 threshold.

| chromosome | SNP        | MAF_cases | MAF_controls | p_value     |
|------------|------------|-----------|--------------|-------------|
| 3          | rs9850123  | 0.182796  | 0.139297     | 0.006984476 |
| 5          | rs17072571 | 0.324373  | 0.384078     | 0.006984476 |
| 6          | rs3008801  | 0.473118  | 0.412015     | 0.006984476 |
| 1          | rs11206633 | 0.428315  | 0.489615     | 0.006988143 |
| 2          | rs6543289  | 0.240143  | 0.296561     | 0.006988143 |
| 3          | rs187585   | 0.0412186 | 0.0722563    | 0.006995482 |
| 8          | rs919037   | 0.516129  | 0.4547       | 0.006995482 |
| 13         | rs9524627  | 0.431408  | 0.372319     | 0.006999155 |
| 1          | rs17647548 | 0.0555556 | 0.0903204    | 0.007006506 |
| 10         | rs2245896  | 0.259857  | 0.316695     | 0.007017547 |
| 13         | rs9553120  | 0.191756  | 0.14765      | 0.007024918 |
| 15         | rs3784377  | 0.336331  | 0.280143     | 0.007035989 |
| 5          | rs27000    | 0.307554  | 0.253922     | 0.007047078 |
| 5          | rs12188475 | 0.396057  | 0.338446     | 0.007047078 |
| 10         | rs12764630 | 0.028777  | 0.0561989    | 0.007047078 |
| 10         | rs7907925  | 0.111511  | 0.156154     | 0.007050778 |
| 3          | rs4677791  | 0.523297  | 0.461473     | 0.00705448  |
| 2          | rs10200606 | 0.0394265 | 0.0705019    | 0.007058184 |
| 3          | rs4419372  | 0.172662  | 0.223944     | 0.007065599 |
| 11         | rs621698   | 0.268817  | 0.326576     | 0.007065599 |
| 13         | rs1986272  | 0.268817  | 0.325613     | 0.007073021 |
| 21         | rs2212828  | 0.327338  | 0.386921     | 0.007073021 |
| 6          | rs3117242  | 0.215054  | 0.269611     | 0.007076735 |
| 18         | rs1562995  | 0.284173  | 0.342643     | 0.007080451 |
| 11         | rs9919625  | 0.120072  | 0.164169     | 0.007084169 |
| 21         | rs2834732  | 0.422939  | 0.363327     | 0.007084169 |
| 6          | rs3128923  | 0.215054  | 0.269584     | 0.007087889 |
| 8          | rs3808539  | 0.526882  | 0.465576     | 0.007087889 |
| 3          | rs7432306  | 0.301075  | 0.359434     | 0.007091612 |
| 5          | rs892004   | 0.307554  | 0.36644      | 0.007095336 |
| 9          | rs10119177 | 0.263441  | 0.212679     | 0.007095336 |
| 1          | rs12069039 | 0.543165  | 0.481045     | 0.00710652  |
| 1          | rs1063412  | 0.399642  | 0.459611     | 0.007110252 |
| 1          | rs7514832  | 0.543011  | 0.48109      | 0.007117722 |
| 11         | rs11039627 | 0.383513  | 0.443952     | 0.007125201 |
| 20         | rs6037033  | 0.304659  | 0.250937     | 0.007132687 |
| 12         | rs11173607 | 0.456679  | 0.39567      | 0.007147684 |
| 16         | rs4781980  | 0.341155  | 0.285714     | 0.007147684 |
| 6          | rs1033572  | 0.404332  | 0.34542      | 0.007151438 |
| 16         | rs11077316 | 0.449821  | 0.390726     | 0.007155194 |
| 5          | rs758038   | 0.456989  | 0.397274     | 0.007162713 |
| 11         | rs1032779  | 0.207885  | 0.262172     | 0.007162713 |
| 5          | rs2401809  | 0.309353  | 0.369113     | 0.007174005 |
| 10         | rs2297330  | 0.157706  | 0.207014     | 0.007174005 |
| 2          | rs2679895  | 0.170251  | 0.220538     | 0.007185316 |
| 4          | rs13104825 | 0.40681   | 0.347885     | 0.007189091 |
| 11         | rs746718   | 0.367384  | 0.428401     | 0.007189091 |
| 2          | rs768742   | 0.247312  | 0.19731      | 0.007207993 |
| 11         | rs658544   | 0.268817  | 0.326465     | 0.007215568 |
| 11         | rs623823   | 0.268817  | 0.326465     | 0.007215568 |
| 7          | rs17150823 | 0.116487  | 0.0817439    | 0.007219359 |
| 5          | rs315808   | 0.216606  | 0.168995     | 0.007223152 |

Table DS2: All SNPs tested for association (RDC SABP vs. controls) with the Cochran-Armitage trend test and significant at the p=0.05 threshold.

| chromosome | SNP        | MAF_cases | MAF_controls | p_value     |
|------------|------------|-----------|--------------|-------------|
| 16         | rs12708620 | 0.229391  | 0.284424     | 0.007234542 |
| 3          | rs4683989  | 0.348921  | 0.409741     | 0.007242146 |
| 2          | rs4625907  | 0.131295  | 0.177793     | 0.007245951 |
| 1          | rs17587185 | 0.0555556 | 0.09015      | 0.007249758 |
| 1          | rs11161510 | 0.25448   | 0.310967     | 0.007257378 |
| 3          | rs162410   | 0.137681  | 0.185009     | 0.007265006 |
| 6          | rs1555247  | 0.217626  | 0.171268     | 0.007265006 |
| 7          | rs1637311  | 0.161871  | 0.210858     | 0.007268823 |
| 15         | rs17586255 | 0.182796  | 0.234322     | 0.007284112 |
| 6          | rs9402716  | 0.390681  | 0.332652     | 0.00728794  |
| 9          | rs1628249  | 0.46595   | 0.406399     | 0.00728794  |
| 12         | rs12821335 | 0.496403  | 0.435814     | 0.00728794  |
| 5          | rs2036853  | 0.157706  | 0.117547     | 0.007291769 |
| 19         | rs6510205  | 0.44086   | 0.381691     | 0.007291769 |
| 2          | rs13033133 | 0.102151  | 0.0701157    | 0.007295601 |
| 21         | rs9980326  | 0.164875  | 0.214602     | 0.007299434 |
| 2          | rs12999876 | 0.0953237 | 0.0645216    | 0.007307108 |
| 8          | rs1721062  | 0.401079  | 0.342302     | 0.007307108 |
| 10         | rs988459   | 0.100358  | 0.142638     | 0.007307108 |
| 12         | rs7300868  | 0.449821  | 0.388699     | 0.007307108 |
| 5          | rs4866836  | 0.315884  | 0.261077     | 0.007310948 |
| 5          | rs1592758  | 0.323741  | 0.383384     | 0.007310948 |
| 11         | rs11032613 | 0.151079  | 0.111584     | 0.007310948 |
| 8          | rs10090689 | 0.132616  | 0.095498     | 0.007314789 |
| 5          | rs153577   | 0.149281  | 0.110126     | 0.007326327 |
| 5          | rs11747146 | 0.140288  | 0.102016     | 0.007326327 |
| 12         | rs905559   | 0.46595   | 0.405346     | 0.007326327 |
| 14         | rs7145688  | 0.194245  | 0.245913     | 0.007326327 |
| 2          | rs2714284  | 0.505376  | 0.44543      | 0.007330177 |
| 6          | rs4401694  | 0.179211  | 0.137138     | 0.007330177 |
| 7          | rs7777321  | 0.310036  | 0.368313     | 0.007330177 |
| 7          | rs2471291  | 0.0985663 | 0.0670648    | 0.007330177 |
| 1          | rs12735229 | 0.366906  | 0.427353     | 0.00733403  |
| 7          | rs2471292  | 0.0985663 | 0.0670752    | 0.007337884 |
| 2          | rs1025445  | 0.426523  | 0.488753     | 0.007345599 |
| 2          | rs1346776  | 0.24552   | 0.196453     | 0.007349459 |
| 10         | rs7919961  | 0.0286738 | 0.055726     | 0.007349459 |
| 10         | rs11244491 | 0.0842294 | 0.0559536    | 0.007357186 |
| 6          | rs7763627  | 0.134409  | 0.0972411    | 0.007364922 |
| 7          | rs2012593  | 0.376344  | 0.319454     | 0.007364922 |
| 10         | rs9658786  | 0.115108  | 0.159176     | 0.007364922 |
| 3          | rs41182    | 0.0412186 | 0.0721105    | 0.007368792 |
| 6          | rs9379118  | 0.312274  | 0.258427     | 0.007380418 |
| 8          | rs12544168 | 0.129032  | 0.0932175    | 0.007388178 |
| 7          | rs6966318  | 0.275986  | 0.224514     | 0.007392061 |
| 9          | rs260214   | 0.350719  | 0.294789     | 0.007392061 |
| 9          | rs10818930 | 0.218638  | 0.171886     | 0.007392061 |
| 2          | rs12712704 | 0.0448029 | 0.077251     | 0.007403724 |
| 4          | rs2282764  | 0.166667  | 0.125979     | 0.007403724 |
| 14         | rs1483991  | 0.112727  | 0.157294     | 0.007407615 |
| 2          | rs1351924  | 0.123656  | 0.0889571    | 0.007411509 |
| 4          | rs10518414 | 0.494624  | 0.43322      | 0.007423203 |

Table DS2: All SNPs tested for association (RDC SABP vs. controls) with the Cochran-Armitage trend test and significant at the p=0.05 threshold.

| chromosome | SNP        | MAF_cases | MAF_controls | p_value     |
|------------|------------|-----------|--------------|-------------|
| 1          | rs1582114  | 0.392086  | 0.333617     | 0.00743101  |
| 5          | rs872622   | 0.521505  | 0.460818     | 0.007434916 |
| 6          | rs330867   | 0.318345  | 0.377558     | 0.007434916 |
| 8          | rs13254505 | 0.358423  | 0.30225      | 0.007434916 |
| 1          | rs3014715  | 0.157706  | 0.206203     | 0.007442735 |
| 7          | rs1860577  | 0.227599  | 0.180688     | 0.007442735 |
| 4          | rs687188   | 0.184588  | 0.141908     | 0.007446648 |
| 5          | rs10940135 | 0.112903  | 0.156676     | 0.007450562 |
| 3          | rs1875688  | 0.0555556 | 0.0900102    | 0.007458398 |
| 9          | rs10511779 | 0.172101  | 0.129775     | 0.007458398 |
| 2          | rs1921270  | 0.408602  | 0.470017     | 0.007462319 |
| 1          | rs1173658  | 0.37276   | 0.315718     | 0.007466242 |
| 6          | rs3823240  | 0.224014  | 0.177172     | 0.007466242 |
| 6          | rs11751354 | 0.267148  | 0.325307     | 0.007478024 |
| 8          | rs7839135  | 0.357914  | 0.301771     | 0.00748589  |
| 6          | rs9294720  | 0.381295  | 0.322586     | 0.007489826 |
| 6          | rs9376318  | 0.193548  | 0.149114     | 0.007489826 |
| 13         | rs9515279  | 0.508993  | 0.448569     | 0.007493764 |
| 20         | rs6079764  | 0.123656  | 0.169391     | 0.007497704 |
| 15         | rs7168115  | 0.196043  | 0.151892     | 0.00750559  |
| 10         | rs7908131  | 0.320789  | 0.380246     | 0.007517436 |
| 14         | rs6574054  | 0.336331  | 0.395876     | 0.007521389 |
| 18         | rs11152206 | 0.408273  | 0.469475     | 0.007521389 |
| 7          | rs3801899  | 0.357914  | 0.418058     | 0.0075293   |
| 18         | rs2155773  | 0.34767   | 0.292575     | 0.0075293   |
| 6          | rs9478583  | 0.277778  | 0.335152     | 0.00753326  |
| 8          | rs2101487  | 0.21223   | 0.166723     | 0.007541184 |
| 10         | rs12358487 | 0.512545  | 0.452129     | 0.007541184 |
| 11         | rs1784992  | 0.315412  | 0.374617     | 0.007541184 |
| 13         | rs10492555 | 0.194245  | 0.150034     | 0.007541184 |
| 4          | rs12498487 | 0.483871  | 0.423654     | 0.00754515  |
| 6          | rs17060441 | 0.102151  | 0.144513     | 0.007549118 |
| 7          | rs6463813  | 0.489247  | 0.429765     | 0.007549118 |
| 18         | rs1944360  | 0.285971  | 0.234242     | 0.007549118 |
| 8          | rs9325744  | 0.166667  | 0.125341     | 0.007553087 |
| 13         | rs3842843  | 0.294224  | 0.242331     | 0.007557059 |
| 5          | rs3822365  | 0.272401  | 0.221065     | 0.007561033 |
| 1          | rs1340429  | 0.455197  | 0.395777     | 0.00756501  |
| 8          | rs16897550 | 0.374552  | 0.318089     | 0.007568988 |
| 13         | rs1340900  | 0.47482   | 0.414792     | 0.007568988 |
| 1          | rs7529081  | 0.0806452 | 0.120266     | 0.007572969 |
| 10         | rs211412   | 0.0752688 | 0.113349     | 0.007576951 |
| 10         | rs11199432 | 0.048913  | 0.0818803    | 0.007576951 |
| 1          | rs1173657  | 0.37276   | 0.315843     | 0.007580936 |
| 2          | rs6548026  | 0.329749  | 0.274991     | 0.007588912 |
| 7          | rs4431484  | 0.202509  | 0.157527     | 0.007588912 |
| 13         | rs2018273  | 0.165468  | 0.12483      | 0.007592903 |
| 10         | rs1888690  | 0.181004  | 0.138019     | 0.007596897 |
| 13         | rs17752375 | 0.141577  | 0.10406      | 0.007596897 |
| 11         | rs10891655 | 0.53405   | 0.472724     | 0.007600892 |
| 14         | rs1189047  | 0.464029  | 0.40382      | 0.007600892 |
| 16         | rs2267772  | 0.284946  | 0.343207     | 0.007600892 |

Table DS2: All SNPs tested for association (RDC SABP vs. controls) with the Cochran-Armitage trend test and significant at the p=0.05 threshold.

| chromosome | SNP           | MAF_cases | MAF_controls | p_value     |
|------------|---------------|-----------|--------------|-------------|
| 10         | rs7071503     | 0.0286738 | 0.055688     | 0.00760489  |
| 14         | SNP_A-1883094 | 0.453405  | 0.394316     | 0.00760489  |
| 21         | rs1734503     | 0.397849  | 0.339523     | 0.00760489  |
| 5          | rs10075728    | 0.453237  | 0.393222     | 0.00760889  |
| 4          | rs4865181     | 0.116487  | 0.160654     | 0.007612891 |
| 5          | rs1981826     | 0.302867  | 0.249659     | 0.007612891 |
| 2          | rs4848905     | 0.102151  | 0.144634     | 0.007616896 |
| 6          | rs6924834     | 0.0358423 | 0.0657805    | 0.007632934 |
| 11         | rs7126338     | 0.340502  | 0.400715     | 0.007632934 |
| 3          | rs7644602     | 0.391697  | 0.452795     | 0.007636948 |
| 12         | rs11052223    | 0.399642  | 0.459768     | 0.007636948 |
| 4          | SNP_A-2083348 | 0.438849  | 0.498978     | 0.007644985 |
| 1          | rs11119591    | 0.197842  | 0.153833     | 0.007649006 |
| 2          | rs12617593    | 0.0985663 | 0.0675307    | 0.007649006 |
| 16         | rs1424000     | 0.168459  | 0.218495     | 0.00765303  |
| 4          | rs755535      | 0.323741  | 0.383475     | 0.007657055 |
| 5          | rs17492893    | 0.34296   | 0.287491     | 0.007657055 |
| 5          | rs10477374    | 0.302867  | 0.249744     | 0.007665113 |
| 6          | rs2021033     | 0.433453  | 0.494361     | 0.007665113 |
| 8          | rs1030420     | 0.218638  | 0.171944     | 0.007665113 |
| 12         | rs11174250    | 0.11828   | 0.084015     | 0.007665113 |
| 19         | rs8102702     | 0.112903  | 0.079809     | 0.007665113 |
| 19         | rs4513216     | 0.238351  | 0.293115     | 0.00767318  |
| 4          | rs17278241    | 0.483871  | 0.423758     | 0.007685296 |
| 1          | rs10495224    | 0.243728  | 0.195126     | 0.007689339 |
| 12         | rs2109417     | 0.464029  | 0.403518     | 0.007693384 |
| 22         | rs558900      | 0.154122  | 0.202146     | 0.007693384 |
| 3          | rs2090587     | 0.132616  | 0.179094     | 0.007697431 |
| 14         | rs10483706    | 0.195341  | 0.150988     | 0.007697431 |
| 18         | rs11082423    | 0.430108  | 0.490971     | 0.007713643 |
| 18         | rs12953710    | 0.137993  | 0.184712     | 0.007713643 |
| 19         | rs2865276     | 0.244604  | 0.299864     | 0.007713643 |
| 8          | rs2945770     | 0.172043  | 0.130753     | 0.007717701 |
| 2          | rs7607695     | 0.151625  | 0.11259      | 0.007725824 |
| 3          | rs2090951     | 0.0863309 | 0.0574693    | 0.007725824 |
| 6          | rs9294101     | 0.132616  | 0.0961801    | 0.007729889 |
| 17         | rs12602586    | 0.426523  | 0.486551     | 0.007733956 |
| 2          | rs4667358     | 0.473118  | 0.412636     | 0.007742097 |
| 3          | rs1077524     | 0.403226  | 0.344963     | 0.007742097 |
| 5          | rs9327455     | 0.227599  | 0.180347     | 0.00774617  |
| 6          | rs3128963     | 0.251799  | 0.307535     | 0.00774617  |
| 17         | rs1801052     | 0.347122  | 0.290801     | 0.00774617  |
| 5          | rs17427286    | 0.342294  | 0.287053     | 0.007750246 |
| 8          | rs12541423    | 0.129032  | 0.093356     | 0.007754324 |
| 1          | rs12240145    | 0.078853  | 0.0513955    | 0.007762487 |
| 1          | rs3935320     | 0.078853  | 0.0513955    | 0.007762487 |
| 3          | rs9819327     | 0.178058  | 0.228961     | 0.007762487 |
| 2          | rs1921152     | 0.247312  | 0.197885     | 0.007766571 |
| 7          | rs6965237     | 0.406475  | 0.467439     | 0.007766571 |
| 16         | rs2346254     | 0.331541  | 0.276432     | 0.007770658 |
| 12         | rs12579771    | 0.25448   | 0.204801     | 0.007774747 |
| 1          | rs9943259     | 0.256272  | 0.205963     | 0.007778838 |

Table DS2: All SNPs tested for association (RDC SABP vs. controls) with the Cochran-Armitage trend test and significant at the p=0.05 threshold.

| chromosome | SNP        | MAF_cases | MAF_controls | p_value     |
|------------|------------|-----------|--------------|-------------|
| 8          | rs2618476  | 0.305755  | 0.253065     | 0.007791125 |
| 4          | rs1405670  | 0.270609  | 0.32805      | 0.007795225 |
| 1          | rs11264045 | 0.172043  | 0.221825     | 0.007819871 |
| 4          | rs17585837 | 0.22482   | 0.279482     | 0.007819871 |
| 4          | rs673085   | 0.116906  | 0.0829642    | 0.007823986 |
| 11         | rs470713   | 0.268817  | 0.325835     | 0.007823986 |
| 1          | rs4658318  | 0.405018  | 0.347165     | 0.007828104 |
| 13         | rs4646221  | 0.446237  | 0.386899     | 0.007832224 |
| 4          | rs6857578  | 0.327957  | 0.273331     | 0.007836346 |
| 5          | rs11749295 | 0.141577  | 0.10369      | 0.007836346 |
| 9          | rs6559938  | 0.0809353 | 0.120402     | 0.007836346 |
| 5          | rs899162   | 0.132616  | 0.0963568    | 0.00784047  |
| 13         | rs1642687  | 0.437276  | 0.378236     | 0.00784047  |
| 4          | rs6824779  | 0.177419  | 0.227783     | 0.007848726 |
| 4          | rs1396282  | 0.195341  | 0.247954     | 0.007848726 |
| 12         | rs11173071 | 0.112903  | 0.156378     | 0.007848726 |
| 7          | rs10954012 | 0.227599  | 0.180905     | 0.00785699  |
| 7          | rs1404938  | 0.442446  | 0.503238     | 0.007861125 |
| 16         | rs1012650  | 0.480287  | 0.420129     | 0.007861125 |
| 8          | rs10104893 | 0.0806452 | 0.11921      | 0.007865263 |
| 15         | rs7181263  | 0.0645161 | 0.100204     | 0.007877689 |
| 5          | rs6896154  | 0.301075  | 0.358822     | 0.007885985 |
| 1          | rs1538018  | 0.202509  | 0.254344     | 0.007890136 |
| 4          | rs300917   | 0.419065  | 0.360014     | 0.007902602 |
| 10         | rs4933414  | 0.116487  | 0.0825672    | 0.007902602 |
| 11         | rs10790005 | 0.53405   | 0.473083     | 0.007906762 |
| 19         | rs435991   | 0.444245  | 0.385442     | 0.007906762 |
| 4          | rs2305339  | 0.195341  | 0.246596     | 0.007915089 |
| 19         | rs2360750  | 0.37276   | 0.315969     | 0.007919255 |
| 6          | rs13220654 | 0.0842294 | 0.123213     | 0.007923424 |
| 11         | rs10502247 | 0.231183  | 0.285933     | 0.007923424 |
| 17         | rs2905880  | 0.34767   | 0.29161      | 0.007923424 |
| 19         | rs12609543 | 0.24552   | 0.300511     | 0.007927596 |
| 18         | rs2733128  | 0.402527  | 0.345145     | 0.007935945 |
| 1          | rs10915955 | 0.141577  | 0.188438     | 0.007944303 |
| 3          | rs17480477 | 0.124101  | 0.169108     | 0.00795267  |
| 7          | rs7780186  | 0.374552  | 0.317439     | 0.00795267  |
| 17         | rs1966778  | 0.0412186 | 0.0714042    | 0.00795267  |
| 1          | rs835342   | 0.411871  | 0.473056     | 0.007956857 |
| 7          | rs10265438 | 0.464158  | 0.405258     | 0.007956857 |
| 7          | rs11772761 | 0.390288  | 0.333504     | 0.007956857 |
| 4          | rs4689837  | 0.0304659 | 0.0585724    | 0.007965237 |
| 6          | rs2472764  | 0.269784  | 0.218761     | 0.007969431 |
| 8          | rs7842425  | 0.34767   | 0.292504     | 0.007969431 |
| 13         | rs9315248  | 0.383094  | 0.325324     | 0.007969431 |
| 15         | rs11634464 | 0.176895  | 0.134346     | 0.007969431 |
| 17         | rs11079246 | 0.360215  | 0.419789     | 0.007973627 |
| 3          | rs13088513 | 0.516129  | 0.455722     | 0.007977825 |
| 1          | rs10492997 | 0.428315  | 0.369765     | 0.007986229 |
| 2          | rs309307   | 0.44086   | 0.501022     | 0.007994641 |
| 6          | rs9385056  | 0.0842294 | 0.123551     | 0.007994641 |
| 2          | rs7578029  | 0.0878136 | 0.127394     | 0.00799885  |

Table DS2: All SNPs tested for association (RDC SABP vs. controls) with the Cochran-Armitage trend test and significant at the p=0.05 threshold.

| chromosome | SNP        | MAF_cases | MAF_controls | p_value     |
|------------|------------|-----------|--------------|-------------|
| 4          | rs2679144  | 0.206835  | 0.259973     | 0.00799885  |
| 7          | rs17167945 | 0.196043  | 0.152574     | 0.008003062 |
| 5          | rs11952611 | 0.272401  | 0.221711     | 0.008007276 |
| 8          | rs12550037 | 0.129496  | 0.0937287    | 0.008007276 |
| 1          | rs12047364 | 0.510791  | 0.45029      | 0.008015711 |
| 2          | rs17275036 | 0.0609319 | 0.0957084    | 0.008019932 |
| 2          | rs12464261 | 0.412186  | 0.472421     | 0.008024155 |
| 16         | rs2055846  | 0.216606  | 0.270598     | 0.008024155 |
| 4          | rs1510663  | 0.456989  | 0.39734      | 0.008028381 |
| 10         | rs2150556  | 0.501799  | 0.441287     | 0.008032608 |
| 16         | rs12599531 | 0.410394  | 0.352761     | 0.008049542 |
| 11         | rs646240   | 0.133574  | 0.179775     | 0.008058022 |
| 17         | rs7210608  | 0.471326  | 0.411043     | 0.008058022 |
| 17         | rs4968811  | 0.428315  | 0.488764     | 0.008062266 |
| 16         | rs9929593  | 0.297491  | 0.245312     | 0.008066512 |
| 4          | rs11940700 | 0.408602  | 0.351278     | 0.008079264 |
| 9          | rs10119616 | 0.183453  | 0.141056     | 0.008100562 |
| 12         | rs17353923 | 0.267025  | 0.216814     | 0.008100562 |
| 11         | rs1872167  | 0.0989209 | 0.139857     | 0.008104829 |
| 3          | rs1375835  | 0.27518   | 0.224208     | 0.008126196 |
| 11         | rs4310622  | 0.0878136 | 0.127855     | 0.008126196 |
| 10         | rs10047356 | 0.0286738 | 0.055404     | 0.008134759 |
| 18         | rs9304530  | 0.34767   | 0.293086     | 0.008139044 |
| 3          | rs12715572 | 0.188172  | 0.240381     | 0.008156207 |
| 7          | rs6945018  | 0.501792  | 0.44274      | 0.008156207 |
| 12         | rs17042409 | 0.216846  | 0.171097     | 0.008156207 |
| 16         | rs12933593 | 0.303249  | 0.361887     | 0.008156207 |
| 11         | rs10837607 | 0.112903  | 0.156261     | 0.008160504 |
| 8          | rs12542467 | 0.40681   | 0.466769     | 0.008164803 |
| 4          | rs7674419  | 0.267025  | 0.323369     | 0.008169104 |
| 12         | rs1480050  | 0.160072  | 0.209342     | 0.008169104 |
| 2          | rs10181222 | 0.247312  | 0.198023     | 0.008173407 |
| 11         | rs7936722  | 0.147482  | 0.195126     | 0.008177713 |
| 8          | rs1552549  | 0.370968  | 0.315043     | 0.008182021 |
| 1          | rs523504   | 0.157706  | 0.117717     | 0.008186332 |
| 3          | rs9310257  | 0.46223   | 0.402768     | 0.008190645 |
| 5          | rs4509055  | 0.419355  | 0.361206     | 0.008190645 |
| 11         | rs3866520  | 0.371841  | 0.432276     | 0.008199277 |
| 1          | rs17105629 | 0.0537634 | 0.0871419    | 0.008207919 |
| 1          | rs12408537 | 0.078853  | 0.0515534    | 0.008207919 |
| 6          | rs7760341  | 0.480144  | 0.420846     | 0.008207919 |
| 7          | rs17686617 | 0.374552  | 0.317563     | 0.008207919 |
| 12         | rs11063543 | 0.114695  | 0.159006     | 0.008207919 |
| 16         | rs6540026  | 0.0967742 | 0.0662466    | 0.008207919 |
| 5          | rs9327083  | 0.227599  | 0.281335     | 0.008212244 |
| 14         | rs407197   | 0.363309  | 0.422946     | 0.008212244 |
| 1          | rs4244636  | 0.311828  | 0.369847     | 0.00821657  |
| 19         | rs8103449  | 0.444245  | 0.385587     | 0.00821657  |
| 5          | rs13153577 | 0.323741  | 0.269874     | 0.008220899 |
| 11         | rs621953   | 0.268817  | 0.325375     | 0.008225231 |
| 4          | rs17029545 | 0.267148  | 0.324181     | 0.008229565 |
| 18         | rs11876072 | 0.137993  | 0.184219     | 0.008229565 |

Table DS2: All SNPs tested for association (RDC SABP vs. controls) with the Cochran-Armitage trend test and significant at the p=0.05 threshold.

| chromosome | SNP           | MAF_cases | MAF_controls | p_value     |
|------------|---------------|-----------|--------------|-------------|
| 15         | rs7179259     | 0.448029  | 0.389154     | 0.008233901 |
| 19         | rs12610743    | 0.217626  | 0.270805     | 0.008238239 |
| 19         | rs10425451    | 0.255396  | 0.311797     | 0.008238239 |
| 4          | rs1997255     | 0.0917266 | 0.0620102    | 0.008255616 |
| 8          | rs7815606     | 0.142086  | 0.104877     | 0.008255616 |
| 12         | rs1580855     | 0.134409  | 0.0980592    | 0.008259966 |
| 5          | rs17098760    | 0.0752688 | 0.112474     | 0.008264319 |
| 21         | rs1735934     | 0.422662  | 0.364132     | 0.008268674 |
| 3          | rs3821747     | 0.209677  | 0.262432     | 0.00827739  |
| 7          | rs17149337    | 0.446237  | 0.387922     | 0.00827739  |
| 7          | rs12701518    | 0.209677  | 0.262172     | 0.00827739  |
| 9          | rs7858552     | 0.378136  | 0.321551     | 0.00827739  |
| 8          | rs4581087     | 0.0573477 | 0.0909556    | 0.008286117 |
| 6          | SNP_A-1988237 | 0.177419  | 0.135729     | 0.008290483 |
| 13         | rs9594724     | 0.277778  | 0.227071     | 0.008294852 |
| 2          | rs1921151     | 0.247312  | 0.198158     | 0.008299223 |
| 12         | rs11113475    | 0.324373  | 0.270947     | 0.008299223 |
| 3          | rs800621      | 0.344086  | 0.403336     | 0.008303597 |
| 5          | rs4704680     | 0.0791367 | 0.0517888    | 0.008303597 |
| 10         | rs7082842     | 0.0791367 | 0.0517888    | 0.008303597 |
| 14         | rs4587859     | 0.345878  | 0.29046      | 0.008303597 |
| 14         | rs12433138    | 0.244604  | 0.196483     | 0.008303597 |
| 3          | rs2103355     | 0.182796  | 0.140742     | 0.008307973 |
| 19         | SNP_A-1947629 | 0.0824373 | 0.121166     | 0.008307973 |
| 4          | rs7675188     | 0.112903  | 0.0798706    | 0.008316732 |
| 1          | rs6541395     | 0.078853  | 0.0516008    | 0.008329889 |
| 9          | rs9919037     | 0.191756  | 0.148224     | 0.008329889 |
| 8          | rs11984659    | 0.337545  | 0.28249      | 0.008343066 |
| 4          | rs993172      | 0.381295  | 0.440505     | 0.008347464 |
| 7          | rs17404198    | 0.446043  | 0.387679     | 0.008347464 |
| 5          | rs4357059     | 0.458781  | 0.399148     | 0.008369486 |
| 6          | rs7762993     | 0.250896  | 0.202349     | 0.008373897 |
| 6          | rs17344487    | 0.222222  | 0.17592      | 0.008373897 |
| 12         | rs2120528     | 0.125448  | 0.170923     | 0.008378311 |
| 12         | rs11058480    | 0.234767  | 0.18701      | 0.008378311 |
| 1          | rs10923207    | 0.28777   | 0.344293     | 0.008387146 |
| 2          | rs10187657    | 0.532374  | 0.471579     | 0.008387146 |
| 19         | rs1634464     | 0.251799  | 0.202657     | 0.008387146 |
| 12         | rs10842241    | 0.53405   | 0.47337      | 0.008391567 |
| 14         | rs17833422    | 0.222222  | 0.17616      | 0.008395991 |
| 10         | rs10829383    | 0.303957  | 0.251108     | 0.008400416 |
| 15         | rs989546      | 0.544803  | 0.484322     | 0.008400416 |
| 1          | rs2807357     | 0.408602  | 0.351789     | 0.008404845 |
| 1          | rs10918523    | 0.476703  | 0.416213     | 0.008409275 |
| 14         | rs6572456     | 0.383094  | 0.326169     | 0.008409275 |
| 1          | rs2501332     | 0.367384  | 0.310691     | 0.008418144 |
| 5          | rs4865525     | 0.145161  | 0.191914     | 0.008418144 |
| 17         | rs2344310     | 0.331541  | 0.276926     | 0.008418144 |
| 18         | rs470753      | 0.182796  | 0.232788     | 0.008418144 |
| 2          | rs2742345     | 0.0304659 | 0.0579216    | 0.008422581 |
| 9          | rs4742194     | 0.283154  | 0.232471     | 0.008427022 |
| 10         | rs12768356    | 0.0286738 | 0.0552524    | 0.008431464 |

Table DS2: All SNPs tested for association (RDC SABP vs. controls) with the Cochran-Armitage trend test and significant at the p=0.05 threshold.

| chromosome | SNP        | MAF_cases | MAF_controls | p_value     |
|------------|------------|-----------|--------------|-------------|
| 15         | rs7177395  | 0.188172  | 0.145634     | 0.008440356 |
| 21         | rs1734505  | 0.397482  | 0.339857     | 0.008440356 |
| 2          | rs13389345 | 0.353047  | 0.298772     | 0.008444806 |
| 7          | rs3793295  | 0.374101  | 0.317314     | 0.008449258 |
| 9          | rs1333903  | 0.489247  | 0.430007     | 0.008449258 |
| 2          | rs17838583 | 0.0863309 | 0.0577513    | 0.008453713 |
| 19         | rs12610768 | 0.24552   | 0.300068     | 0.008453713 |
| 8          | rs11785843 | 0.295699  | 0.35235      | 0.00845817  |
| 7          | rs11769064 | 0.0770609 | 0.11469      | 0.008462629 |
| 4          | rs230504   | 0.402527  | 0.345774     | 0.008480491 |
| 1          | rs7516730  | 0.451613  | 0.393149     | 0.008484962 |
| 8          | rs17276203 | 0.149281  | 0.196075     | 0.008484962 |
| 14         | rs17128291 | 0.125448  | 0.169843     | 0.008489436 |
| 16         | rs2656647  | 0.150538  | 0.11147      | 0.008498391 |
| 18         | rs176148   | 0.408602  | 0.469315     | 0.008498391 |
| 7          | rs4244215  | 0.24552   | 0.299217     | 0.008502872 |
| 8          | rs6470173  | 0.0776173 | 0.115752     | 0.008511842 |
| 16         | rs1874014  | 0.458781  | 0.400136     | 0.008511842 |
| 1          | rs604735   | 0.505376  | 0.445826     | 0.00851633  |
| 2          | rs1006752  | 0.177419  | 0.135821     | 0.008534307 |
| 21         | rs551680   | 0.31362   | 0.260395     | 0.008543311 |
| 2          | rs3755342  | 0.129032  | 0.0938671    | 0.008547816 |
| 5          | rs1505007  | 0.182796  | 0.140838     | 0.008552324 |
| 2          | rs10196661 | 0.285971  | 0.235104     | 0.008556834 |
| 8          | rs2719219  | 0.106115  | 0.0737398    | 0.008556834 |
| 1          | rs10495223 | 0.243728  | 0.195778     | 0.008561347 |
| 4          | rs6838337  | 0.408273  | 0.351227     | 0.008561347 |
| 20         | rs11699943 | 0.314748  | 0.261247     | 0.008561347 |
| 8          | rs16937223 | 0.0573477 | 0.0909401    | 0.008565862 |
| 11         | rs10768807 | 0.4319    | 0.491658     | 0.008565862 |
| 5          | rs469843   | 0.342294  | 0.288101     | 0.008570379 |
| 1          | rs11589239 | 0.507168  | 0.447001     | 0.008579422 |
| 16         | rs3935873  | 0.408273  | 0.468292     | 0.008583946 |
| 11         | rs688086   | 0.141577  | 0.104429     | 0.008588474 |
| 11         | rs11237796 | 0.244604  | 0.196526     | 0.008593003 |
| 1          | rs10779349 | 0.491039  | 0.43171      | 0.008597535 |
| 12         | rs1988548  | 0.261649  | 0.212555     | 0.008597535 |
| 8          | rs4427198  | 0.503584  | 0.443914     | 0.008606607 |
| 8          | rs6985261  | 0.553763  | 0.493861     | 0.008615688 |
| 1          | rs11210774 | 0.372302  | 0.431981     | 0.008620233 |
| 1          | rs2501330  | 0.367384  | 0.310903     | 0.00862478  |
| 2          | rs7573844  | 0.510791  | 0.451772     | 0.008629329 |
| 9          | rs17536837 | 0.0591398 | 0.0938671    | 0.008629329 |
| 12         | rs4765413  | 0.218638  | 0.271487     | 0.008629329 |
| 2          | rs10210129 | 0.258065  | 0.208859     | 0.008633881 |
| 3          | rs9857344  | 0.548387  | 0.48842      | 0.008633881 |
| 5          | rs12152969 | 0.383513  | 0.327363     | 0.008633881 |
| 16         | rs4356466  | 0.282374  | 0.338957     | 0.008642992 |
| 17         | rs8080254  | 0.216846  | 0.270358     | 0.008642992 |
| 2          | rs10189164 | 0.275986  | 0.225494     | 0.008647551 |
| 13         | rs1410157  | 0.0467626 | 0.0783112    | 0.008652112 |
| 1          | rs10736388 | 0.261649  | 0.316865     | 0.008656676 |



Table DS2: All SNPs tested for association (RDC SABP vs. controls) with the Cochran-Armitage trend test and significant at the p=0.05 threshold.

| chromosome | SNP           | MAF_cases | MAF_controls | p_value     |
|------------|---------------|-----------|--------------|-------------|
| 2          | rs2971628     | 0.179211  | 0.22938      | 0.008656676 |
| 3          | rs151282      | 0.137993  | 0.184112     | 0.008656676 |
| 4          | rs17473283    | 0.412186  | 0.355147     | 0.008665812 |
| 7          | rs7779958     | 0.374552  | 0.318012     | 0.008665812 |
| 4          | rs1159057     | 0.338129  | 0.396969     | 0.008670383 |
| 14         | rs2383418     | 0.345878  | 0.290702     | 0.008674957 |
| 9          | rs4742042     | 0.184116  | 0.141906     | 0.008688694 |
| 3          | rs9819062     | 0.0519713 | 0.0851499    | 0.008697864 |
| 3          | rs2630445     | 0.0716846 | 0.108104     | 0.008697864 |
| 11         | rs471435      | 0.152878  | 0.200306     | 0.008707044 |
| 13         | rs9545344     | 0.221223  | 0.175325     | 0.008707044 |
| 16         | rs2880916     | 0.243728  | 0.196015     | 0.008707044 |
| 6          | rs4870308     | 0.553763  | 0.493867     | 0.008711638 |
| 12         | rs1436120     | 0.147482  | 0.194378     | 0.008716234 |
| 9          | rs7026798     | 0.38172   | 0.439673     | 0.008720832 |
| 2          | SNP_A-4237400 | 0.0485612 | 0.0808874    | 0.008734643 |
| 6          | rs969760      | 0.12724   | 0.171039     | 0.008734643 |
| 2          | rs13426349    | 0.0842294 | 0.123425     | 0.008748477 |
| 5          | rs10036163    | 0.143369  | 0.105631     | 0.008748477 |
| 6          | rs1478572     | 0.292115  | 0.239864     | 0.008762332 |
| 16         | rs1630373     | 0.397849  | 0.456544     | 0.008762332 |
| 20         | rs4812637     | 0.0377698 | 0.0667348    | 0.008762332 |
| 5          | rs16892251    | 0.166667  | 0.126319     | 0.008766956 |
| 8          | rs2355641     | 0.197842  | 0.249574     | 0.008766956 |
| 2          | rs7591137     | 0.397482  | 0.340368     | 0.008780842 |
| 3          | rs9835843     | 0.177419  | 0.136116     | 0.008780842 |
| 20         | rs6135332     | 0.232975  | 0.18552      | 0.008780842 |
| 16         | rs4438316     | 0.0286738 | 0.0555935    | 0.008785475 |
| 8          | rs1351874     | 0.318345  | 0.264986     | 0.008790111 |
| 1          | rs12754943    | 0.437276  | 0.37824      | 0.00879475  |
| 3          | rs2322809     | 0.548387  | 0.488594     | 0.00879475  |
| 11         | rs183442      | 0.498208  | 0.438608     | 0.00879475  |
| 21         | rs9305602     | 0.154122  | 0.114991     | 0.00879475  |
| 4          | rs10520478    | 0.198925  | 0.15509      | 0.008804034 |
| 1          | rs7546453     | 0.428315  | 0.371034     | 0.008808681 |
| 3          | rs9845458     | 0.15233   | 0.113629     | 0.008808681 |
| 13         | rs7995031     | 0.190647  | 0.147429     | 0.008808681 |
| 1          | rs233051      | 0.345324  | 0.291284     | 0.008813329 |
| 1          | rs12136518    | 0.0896057 | 0.0602861    | 0.00882729  |
| 1          | rs10924579    | 0.207581  | 0.163203     | 0.008831949 |
| 5          | rs17062865    | 0.152878  | 0.199898     | 0.008831949 |
| 10         | rs16917298    | 0.073741  | 0.110143     | 0.008831949 |
| 17         | rs9908162     | 0.297834  | 0.355241     | 0.008831949 |
| 1          | rs6662890     | 0.136201  | 0.1          | 0.00883661  |
| 3          | rs4502533     | 0.314079  | 0.261189     | 0.008841274 |
| 6          | rs3087697     | 0.384892  | 0.44382      | 0.008841274 |
| 8          | rs7834259     | 0.28777   | 0.236367     | 0.008850609 |
| 3          | rs1105033     | 0.213262  | 0.265588     | 0.00885528  |
| 7          | rs6959031     | 0.40681   | 0.465576     | 0.00885528  |
| 8          | rs7830377     | 0.252688  | 0.204259     | 0.00886463  |
| 14         | rs17096112    | 0.281362  | 0.231018     | 0.00886463  |
| 5          | rs6872330     | 0.32554   | 0.384379     | 0.00887399  |

Table DS2: All SNPs tested for association (RDC SABP vs. controls) with the Cochran-Armitage trend test and significant at the p=0.05 threshold.

| chromosome | SNP           | MAF_cases | MAF_controls | p_value     |
|------------|---------------|-----------|--------------|-------------|
| 6          | rs2987595     | 0.290323  | 0.346167     | 0.00887399  |
| 8          | rs3735942     | 0.284946  | 0.341505     | 0.008878674 |
| 4          | rs2866218     | 0.277778  | 0.33322      | 0.00888336  |
| 9          | rs12380879    | 0.447842  | 0.388927     | 0.00888336  |
| 6          | rs9456352     | 0.241935  | 0.194037     | 0.008888049 |
| 6          | rs10484323    | 0.103943  | 0.0729665    | 0.008897435 |
| 2          | rs7419467     | 0.100358  | 0.0697714    | 0.008902131 |
| 4          | rs922029      | 0.391697  | 0.335609     | 0.008902131 |
| 19         | rs4804750     | 0.385305  | 0.3297       | 0.008902131 |
| 3          | rs1105032     | 0.213262  | 0.265518     | 0.008906831 |
| 5          | rs2909825     | 0.363309  | 0.422499     | 0.008906831 |
| 8          | SNP_A-1994073 | 0.315412  | 0.2627       | 0.008906831 |
| 15         | rs4887125     | 0.12724   | 0.171604     | 0.008911532 |
| 8          | rs7009604     | 0.210432  | 0.165985     | 0.008916236 |
| 12         | rs17204888    | 0.12724   | 0.0923339    | 0.008916236 |
| 3          | rs16847692    | 0.277978  | 0.226853     | 0.008920943 |
| 9          | rs586348      | 0.546595  | 0.486537     | 0.008920943 |
| 3          | rs1511594     | 0.0448029 | 0.0761092    | 0.008925652 |
| 6          | rs753626      | 0.361511  | 0.306209     | 0.008930364 |
| 11         | rs567708      | 0.141577  | 0.1046       | 0.008930364 |
| 11         | rs2276360     | 0.177419  | 0.22735      | 0.008930364 |
| 12         | rs17440956    | 0.195341  | 0.151536     | 0.008930364 |
| 14         | rs11622475    | 0.246403  | 0.299761     | 0.008930364 |
| 11         | rs4752917     | 0.38172   | 0.440293     | 0.008944515 |
| 8          | rs10102438    | 0.16129   | 0.209666     | 0.008949237 |
| 5          | rs11748341    | 0.140288  | 0.186945     | 0.008953961 |
| 1          | rs1857570     | 0.405018  | 0.464042     | 0.008958688 |
| 11         | rs1878533     | 0.370968  | 0.42969      | 0.008958688 |
| 13         | rs687456      | 0.229391  | 0.282794     | 0.008963418 |
| 20         | rs1287051     | 0.349462  | 0.294619     | 0.008963418 |
| 4          | rs642783      | 0.184116  | 0.142224     | 0.00896815  |
| 4          | rs10015996    | 0.112903  | 0.0801566    | 0.00896815  |
| 8          | rs16884109    | 0.129032  | 0.0938887    | 0.008972885 |
| 10         | rs7910238     | 0.234767  | 0.288999     | 0.008977622 |
| 13         | rs9508066     | 0.365591  | 0.309605     | 0.008982362 |
| 15         | rs293360      | 0.431408  | 0.491135     | 0.00899185  |
| 10         | rs10776583    | 0.397482  | 0.456433     | 0.008996597 |
| 16         | rs7204797     | 0.410394  | 0.470048     | 0.009001348 |
| 3          | rs3115268     | 0.433692  | 0.37632      | 0.0090061   |
| 5          | rs2112959     | 0.0985663 | 0.139721     | 0.0090061   |
| 1          | rs12025606    | 0.494604  | 0.43439      | 0.009010856 |
| 2          | rs976384      | 0.487455  | 0.42823      | 0.009010856 |
| 16         | rs11642249    | 0.353047  | 0.412406     | 0.009029903 |
| 11         | rs10892674    | 0.222222  | 0.275451     | 0.009034671 |
| 11         | rs7479361     | 0.254513  | 0.309264     | 0.009039441 |
| 3          | rs6445707     | 0.18638   | 0.143441     | 0.009044215 |
| 5          | rs13162946    | 0.324373  | 0.382193     | 0.009044215 |
| 18         | rs8093609     | 0.15146   | 0.199147     | 0.009044215 |
| 21         | rs11088596    | 0.224014  | 0.277267     | 0.009044215 |
| 10         | rs7084314     | 0.0286738 | 0.0547408    | 0.009048991 |
| 3          | rs16828       | 0.388889  | 0.448105     | 0.009053769 |
| 6          | rs302604      | 0.31362   | 0.370106     | 0.009053769 |

Table DS2 All SNPs tested for association (RDC SABP vs. controls) with the Cochran-Armitage trend test and significant at the p=0.05 threshold.

| chromosome | SNP        | MAF_cases | MAF_controls | p_value     |
|------------|------------|-----------|--------------|-------------|
| 5          | rs248725   | 0.339928  | 0.398568     | 0.00905855  |
| 18         | rs1581426  | 0.320144  | 0.267839     | 0.00905855  |
| 3          | rs6788339  | 0.471326  | 0.412807     | 0.009063334 |
| 5          | rs3849683  | 0.107527  | 0.149642     | 0.009063334 |
| 5          | rs11242181 | 0.278777  | 0.336066     | 0.009063334 |
| 13         | rs10454657 | 0.473118  | 0.414568     | 0.009063334 |
| 4          | rs2706095  | 0.408602  | 0.35206      | 0.00906812  |
| 15         | rs11247210 | 0.442652  | 0.501023     | 0.009072909 |
| 1          | rs267665   | 0.240143  | 0.192609     | 0.0090777   |
| 3          | rs2637762  | 0.421147  | 0.48075      | 0.0090777   |
| 3          | rs2677213  | 0.433692  | 0.376364     | 0.0090777   |
| 22         | rs9626091  | 0.157706  | 0.118991     | 0.009087291 |
| 2          | rs1540789  | 0.503584  | 0.445297     | 0.009096892 |
| 18         | rs2051293  | 0.383513  | 0.327263     | 0.009096892 |
| 4          | rs1602452  | 0.112903  | 0.0802112    | 0.009101696 |
| 5          | rs10070447 | 0.408273  | 0.351006     | 0.009106503 |
| 6          | rs2294827  | 0.116487  | 0.0830491    | 0.009106503 |
| 8          | rs1532972  | 0.362007  | 0.420613     | 0.009106503 |
| 2          | rs13007757 | 0.0734767 | 0.0475136    | 0.009111313 |
| 4          | rs7687232  | 0.129032  | 0.173306     | 0.009111313 |
| 5          | rs2956593  | 0.155914  | 0.117637     | 0.009116125 |
| 10         | rs7090721  | 0.532258  | 0.472023     | 0.009116125 |
| 2          | rs4663337  | 0.224014  | 0.178644     | 0.009125757 |
| 5          | rs4836339  | 0.226619  | 0.180286     | 0.009125757 |
| 10         | rs1917820  | 0.396057  | 0.454901     | 0.009130577 |
| 3          | rs12637032 | 0.396057  | 0.339122     | 0.009140225 |
| 1          | rs6673004  | 0.184116  | 0.141689     | 0.009145053 |
| 10         | rs10857508 | 0.12724   | 0.0927818    | 0.009145053 |
| 4          | rs2589845  | 0.178058  | 0.228016     | 0.009149883 |
| 3          | rs614566   | 0.0917266 | 0.0623509    | 0.009154716 |
| 15         | rs4886934  | 0.0794224 | 0.052282     | 0.00916439  |
| 3          | rs6773503  | 0.47482   | 0.416837     | 0.009178921 |
| 2          | rs1275929  | 0.498195  | 0.438225     | 0.00918377  |
| 2          | rs1593699  | 0.102151  | 0.0711119    | 0.009193475 |
| 19         | rs3813781  | 0.455036  | 0.39744      | 0.009193475 |
| 19         | rs7258589  | 0.299283  | 0.247275     | 0.009203191 |
| 6          | rs7766527  | 0.362007  | 0.307116     | 0.009208053 |
| 8          | rs17467140 | 0.146953  | 0.194076     | 0.009208053 |
| 13         | rs206334   | 0.241007  | 0.19346      | 0.009212917 |
| 16         | rs2878404  | 0.370968  | 0.314714     | 0.009212917 |
| 20         | rs6068341  | 0.149819  | 0.112134     | 0.009217784 |
| 8          | rs3824150  | 0.284946  | 0.341172     | 0.009222654 |
| 4          | rs17471740 | 0.318996  | 0.375894     | 0.009227527 |
| 1          | rs6686369  | 0.136201  | 0.100136     | 0.009237279 |
| 10         | rs11200108 | 0.0971223 | 0.0669734    | 0.009256816 |
| 16         | rs11647958 | 0.413978  | 0.47337      | 0.009256816 |
| 17         | rs7222649  | 0.543011  | 0.482594     | 0.009271497 |
| 11         | rs7105712  | 0.222222  | 0.275315     | 0.009286202 |
| 14         | rs17127785 | 0.385305  | 0.329642     | 0.009286202 |
| 17         | rs9303642  | 0.34767   | 0.292675     | 0.009296018 |
| 5          | rs12521065 | 0.301075  | 0.249319     | 0.009310762 |
| 18         | rs448398   | 0.410072  | 0.469857     | 0.009315682 |

Table DS2: All SNPs tested for association (RDC SABP vs. controls) with the Cochran-Armitage trend test and significant at the p=0.05 threshold.

| chromosome | SNP           | MAF_cases | MAF_controls | p_value     |
|------------|---------------|-----------|--------------|-------------|
| 2          | rs13016931    | 0.190217  | 0.241215     | 0.009320605 |
| 6          | rs10946313    | 0.31362   | 0.371171     | 0.00932553  |
| 9          | rs626208      | 0.360507  | 0.419905     | 0.00932553  |
| 11         | rs10501530    | 0.330935  | 0.277248     | 0.00932553  |
| 13         | rs17632604    | 0.143369  | 0.189544     | 0.00932553  |
| 19         | rs1651565     | 0.250896  | 0.202555     | 0.00932553  |
| 5          | rs6872171     | 0.326165  | 0.384458     | 0.009330458 |
| 16         | rs1728367     | 0.123656  | 0.0894074    | 0.009340323 |
| 12         | rs770123      | 0.4319    | 0.49028      | 0.009345259 |
| 3          | rs1372424     | 0.0815217 | 0.120478     | 0.009350197 |
| 14         | rs12590850    | 0.428315  | 0.37121      | 0.009350197 |
| 1          | rs3014717     | 0.170251  | 0.21842      | 0.009355139 |
| 4          | rs639864      | 0.182796  | 0.141445     | 0.009360083 |
| 2          | rs10496489    | 0.394265  | 0.453508     | 0.00936503  |
| 3          | rs9815270     | 0.467742  | 0.40971      | 0.009374931 |
| 4          | rs2319144     | 0.430108  | 0.489605     | 0.009374931 |
| 4          | rs230531      | 0.396057  | 0.34032      | 0.009379886 |
| 16         | rs17220445    | 0.248201  | 0.200477     | 0.009379886 |
| 20         | rs8115044     | 0.150538  | 0.197001     | 0.009379886 |
| 1          | rs10888669    | 0.317204  | 0.374446     | 0.009384844 |
| 13         | rs2765323     | 0.150538  | 0.112078     | 0.009384844 |
| 4          | rs230532      | 0.396057  | 0.340444     | 0.009404701 |
| 3          | rs17007652    | 0.256272  | 0.207737     | 0.009419622 |
| 4          | rs3096491     | 0.158273  | 0.119202     | 0.009419622 |
| 17         | rs17797070    | 0.236559  | 0.189544     | 0.009419622 |
| 2          | rs12470817    | 0.292115  | 0.348123     | 0.009424601 |
| 5          | rs16896079    | 0.112903  | 0.156378     | 0.009424601 |
| 14         | rs221701      | 0.0791367 | 0.0523712    | 0.009429582 |
| 9          | rs4838285     | 0.358423  | 0.417263     | 0.009439554 |
| 18         | rs475235      | 0.530466  | 0.47137      | 0.009439554 |
| 3          | rs2702172     | 0.172043  | 0.131301     | 0.009449536 |
| 5          | rs10213934    | 0.460573  | 0.402422     | 0.009449536 |
| 13         | rs9555087     | 0.519713  | 0.460123     | 0.009454531 |
| 2          | rs10178240    | 0.0645161 | 0.0999659    | 0.009459529 |
| 3          | rs995051      | 0.293907  | 0.243174     | 0.009459529 |
| 6          | rs9295173     | 0.544803  | 0.48568      | 0.00946453  |
| 4          | rs2710551     | 0.122744  | 0.165698     | 0.009469533 |
| 7          | rs3793297     | 0.375     | 0.318942     | 0.009474539 |
| 3          | rs4438608     | 0.182796  | 0.140545     | 0.009504633 |
| 1          | SNP_A-1872931 | 0.253597  | 0.205049     | 0.009509658 |
| 2          | rs12477529    | 0.0878136 | 0.12666      | 0.009509658 |
| 4          | rs4835542     | 0.27957   | 0.335264     | 0.009509658 |
| 2          | rs7583600     | 0.330325  | 0.276755     | 0.009514685 |
| 8          | rs10112860    | 0.127698  | 0.092845     | 0.009514685 |
| 8          | rs519526      | 0.0881295 | 0.0599659    | 0.009514685 |
| 1          | rs1344        | 0.372302  | 0.431299     | 0.009519716 |
| 4          | rs7663547     | 0.216846  | 0.268076     | 0.009519716 |
| 4          | rs1520503     | 0.384892  | 0.329189     | 0.009524749 |
| 4          | SNP_A-1857316 | 0.122744  | 0.0885257    | 0.009524749 |
| 12         | rs2955479     | 0.22043   | 0.175588     | 0.009524749 |
| 16         | rs9935124     | 0.302867  | 0.250596     | 0.009524749 |
| 22         | rs9610322     | 0.412186  | 0.47118      | 0.009524749 |

Table DS2: All SNPs tested for association (RDC SABP vs. controls) with the Cochran-Armitage trend test and significant at the p=0.05 threshold.

| chromosome | SNP           | MAF_cases | MAF_controls | p_value     |
|------------|---------------|-----------|--------------|-------------|
| 15         | rs930847      | 0.274194  | 0.225307     | 0.009529785 |
| 6          | rs16875734    | 0.274194  | 0.328786     | 0.009539865 |
| 11         | rs310057      | 0.0935252 | 0.132914     | 0.009539865 |
| 1          | rs10873910    | 0.320789  | 0.37824      | 0.009544909 |
| 1          | rs1215581     | 0.405018  | 0.3485       | 0.009544909 |
| 8          | rs7005938     | 0.353047  | 0.298604     | 0.009544909 |
| 11         | rs4936335     | 0.342294  | 0.400852     | 0.009549956 |
| 5          | rs2933625     | 0.362007  | 0.42064      | 0.009555006 |
| 10         | rs3750840     | 0.458633  | 0.400545     | 0.009555006 |
| 2          | rs2222809     | 0.154122  | 0.115594     | 0.009560058 |
| 9          | rs10120418    | 0.424188  | 0.483083     | 0.009560058 |
| 10         | rs10795385    | 0.340502  | 0.287198     | 0.009560058 |
| 6          | rs1431403     | 0.240143  | 0.293667     | 0.009565113 |
| 21         | rs3787752     | 0.141577  | 0.187266     | 0.009570171 |
| 1          | rs11800779    | 0.078853  | 0.0520123    | 0.009575232 |
| 2          | rs974699      | 0.329137  | 0.275562     | 0.009575232 |
| 2          | rs4145724     | 0.548387  | 0.48909      | 0.009575232 |
| 3          | rs3772891     | 0.292115  | 0.240968     | 0.009575232 |
| 7          | rs6943676     | 0.078853  | 0.116275     | 0.009575232 |
| 10         | rs6480193     | 0.47491   | 0.416297     | 0.009580295 |
| 2          | rs6756721     | 0.411552  | 0.354344     | 0.009595501 |
| 12         | rs11173469    | 0.21147   | 0.166837     | 0.009600575 |
| 14         | rs1190313     | 0.357914  | 0.415755     | 0.009600575 |
| 3          | rs7635122     | 0.31295   | 0.369625     | 0.009605652 |
| 3          | rs9817540     | 0.31362   | 0.370737     | 0.009605652 |
| 4          | rs1372494     | 0.358423  | 0.416525     | 0.009605652 |
| 1          | rs486929      | 0.376344  | 0.434797     | 0.009610732 |
| 1          | rs10911032    | 0.405018  | 0.463519     | 0.009610732 |
| 14         | rs7156551     | 0.111511  | 0.154187     | 0.009615815 |
| 7          | rs17475512    | 0.0776173 | 0.11566      | 0.0096209   |
| 10         | rs17100442    | 0.09319   | 0.133447     | 0.0096209   |
| 7          | rs6464391     | 0.195341  | 0.152574     | 0.009631079 |
| 8          | rs6988531     | 0.353047  | 0.298673     | 0.009631079 |
| 8          | rs7833579     | 0.53405   | 0.474949     | 0.009631079 |
| 2          | rs1348812     | 0.0845324 | 0.123295     | 0.009641269 |
| 2          | rs1437370     | 0.277174  | 0.332027     | 0.009646368 |
| 8          | SNP_A-2158106 | 0.129032  | 0.0941437    | 0.00965147  |
| 11         | rs1979400     | 0.238351  | 0.292164     | 0.009661682 |
| 14         | rs1950666     | 0.353047  | 0.411244     | 0.009661682 |
| 18         | rs328135      | 0.105735  | 0.146778     | 0.009671905 |
| 21         | rs9984859     | 0.166667  | 0.214675     | 0.00967702  |
| 17         | rs10506521    | 0.229391  | 0.183322     | 0.009682139 |
| 4          | rs6840134     | 0.227599  | 0.181555     | 0.00968726  |
| 4          | rs16994377    | 0.25448   | 0.206013     | 0.009692384 |
| 8          | rs1373302     | 0.284946  | 0.34077      | 0.009692384 |
| 8          | rs2468152     | 0.379928  | 0.324541     | 0.009692384 |
| 4          | rs17034131    | 0.494624  | 0.435671     | 0.009697511 |
| 7          | rs4618585     | 0.437276  | 0.379898     | 0.009697511 |
| 11         | rs11041205    | 0.0860215 | 0.0579019    | 0.00970264  |
| 13         | rs7326743     | 0.218638  | 0.173476     | 0.00970264  |
| 1          | rs659030      | 0.0824373 | 0.0548365    | 0.009707773 |
| 3          | rs9824811     | 0.191756  | 0.149386     | 0.009707773 |

Table DS2: All SNPs tested for association (RDC SABP vs. controls) with the Cochran-Armitage trend test and significant at the p=0.05 threshold.

| chromosome | SNP        | MAF_cases | MAF_controls | p_value     |
|------------|------------|-----------|--------------|-------------|
| 4          | rs17069068 | 0.0358423 | 0.0642249    | 0.009707773 |
| 1          | rs333195   | 0.147482  | 0.109615     | 0.009712908 |
| 7          | rs2282920  | 0.509058  | 0.450426     | 0.009712908 |
| 10         | rs1903997  | 0.526882  | 0.467473     | 0.009712908 |
| 1          | rs571669   | 0.376344  | 0.434686     | 0.009718046 |
| 2          | rs6733830  | 0.392086  | 0.45075      | 0.009718046 |
| 21         | rs229351   | 0.16129   | 0.209639     | 0.009723186 |
| 1          | rs1340092  | 0.138182  | 0.101978     | 0.009733476 |
| 11         | rs12294369 | 0.331541  | 0.38796      | 0.009733476 |
| 1          | rs16863926 | 0.147482  | 0.193383     | 0.009743777 |
| 3          | rs6795120  | 0.374552  | 0.43347      | 0.009743777 |
| 6          | rs9492002  | 0.121377  | 0.0875214    | 0.009743777 |
| 6          | rs1000738  | 0.532258  | 0.474438     | 0.009743777 |
| 8          | rs1545453  | 0.146953  | 0.109636     | 0.009743777 |
| 4          | rs2732072  | 0.207885  | 0.164225     | 0.009748932 |
| 11         | rs10894199 | 0.150538  | 0.197853     | 0.009754089 |
| 1          | rs211718   | 0.257194  | 0.311797     | 0.009764412 |
| 6          | rs9370510  | 0.0358423 | 0.0646537    | 0.009769578 |
| 16         | rs9939590  | 0.442652  | 0.503075     | 0.009769578 |
| 16         | rs4785775  | 0.451439  | 0.394333     | 0.009769578 |
| 4          | rs2160111  | 0.377698  | 0.43654      | 0.009774747 |
| 9          | rs16909359 | 0.111111  | 0.153099     | 0.009774747 |
| 1          | rs1497842  | 0.449821  | 0.392504     | 0.009779918 |
| 3          | rs6548668  | 0.179856  | 0.229394     | 0.009779918 |
| 5          | rs12522491 | 0.482014  | 0.423891     | 0.009790269 |
| 12         | rs11048792 | 0.0685921 | 0.104259     | 0.009790269 |
| 10         | rs10827363 | 0.519713  | 0.46049      | 0.009795449 |
| 17         | rs7211982  | 0.361011  | 0.419591     | 0.009800632 |
| 18         | rs9949657  | 0.176259  | 0.22523      | 0.009800632 |
| 1          | rs3795418  | 0.25448   | 0.205722     | 0.009811006 |
| 12         | rs12581304 | 0.122302  | 0.0884157    | 0.009811006 |
| 8          | rs11987991 | 0.53405   | 0.475136     | 0.009816197 |
| 18         | rs17667182 | 0.140288  | 0.185812     | 0.009826587 |
| 2          | rs10199271 | 0.34767   | 0.293426     | 0.009842194 |
| 12         | rs821854   | 0.351254  | 0.409401     | 0.009842194 |
| 19         | rs747730   | 0.439068  | 0.381952     | 0.009842194 |
| 1          | rs4649923  | 0.214029  | 0.16894      | 0.009847402 |
| 2          | rs4119151  | 0.365591  | 0.311819     | 0.009852613 |
| 4          | rs6531684  | 0.177419  | 0.226589     | 0.009857827 |
| 17         | rs4791845  | 0.336918  | 0.283549     | 0.009857827 |
| 10         | rs1491192  | 0.115108  | 0.157455     | 0.009863043 |
| 11         | rs493524   | 0.134892  | 0.179666     | 0.009868263 |
| 17         | rs8074024  | 0.28853   | 0.23816      | 0.009873485 |
| 4          | rs11098176 | 0.408602  | 0.351839     | 0.00987871  |
| 11         | rs2714049  | 0.415771  | 0.359359     | 0.00987871  |
| 18         | rs1789223  | 0.430108  | 0.373551     | 0.00987871  |
| 8          | rs2471943  | 0.219424  | 0.27121      | 0.009883937 |
| 13         | rs6491426  | 0.0485612 | 0.0793867    | 0.009889168 |
| 19         | rs10084110 | 0.22043   | 0.272324     | 0.009889168 |
| 10         | rs1903995  | 0.526882  | 0.467566     | 0.009894402 |
| 2          | rs1177279  | 0.225806  | 0.278289     | 0.009899638 |
| 5          | rs2561120  | 0.397112  | 0.455336     | 0.009904877 |

Table DS2: All SNPs tested for association (RDC SABP vs. controls) with the Cochran-Armitage trend test and significant at the p=0.05 threshold.

| chromosome | SNP           | MAF_cases | MAF_controls | p_value     |
|------------|---------------|-----------|--------------|-------------|
| 4          | rs6852326     | 0.318996  | 0.266951     | 0.009910119 |
| 14         | rs8023030     | 0.401434  | 0.459639     | 0.009910119 |
| 17         | rs9896837     | 0.363309  | 0.308205     | 0.009910119 |
| 19         | rs7253245     | 0.209677  | 0.261588     | 0.009910119 |
| 6          | rs9491114     | 0.11828   | 0.0851282    | 0.009925862 |
| 2          | rs2166517     | 0.0842294 | 0.122658     | 0.009931115 |
| 2          | rs10497603    | 0.124101  | 0.167802     | 0.009941631 |
| 11         | rs671851      | 0.351254  | 0.297311     | 0.009941631 |
| 18         | rs1941114     | 0.105735  | 0.146558     | 0.009941631 |
| 19         | rs17641958    | 0.413669  | 0.35685      | 0.009952157 |
| 22         | rs16993330    | 0.0806452 | 0.0538881    | 0.009952157 |
| 1          | rs579545      | 0.376344  | 0.434538     | 0.009957425 |
| 7          | rs6946540     | 0.281362  | 0.336175     | 0.009962696 |
| 5          | rs7705177     | 0.107527  | 0.148925     | 0.009967969 |
| 18         | rs10502942    | 0.149281  | 0.111793     | 0.009973245 |
| 2          | rs10186749    | 0.0412186 | 0.0710392    | 0.009989091 |
| 2          | rs17581506    | 0.0878136 | 0.126023     | 0.009989091 |
| 5          | rs300330      | 0.224014  | 0.178073     | 0.009989091 |
| 22         | rs419893      | 0.140288  | 0.104031     | 0.009989091 |
| 21         | rs3787754     | 0.141577  | 0.186946     | 0.009999669 |
| 3          | rs4686030     | 0.424731  | 0.483311     | 0.010004962 |
| 3          | rs4333080     | 0.202509  | 0.252644     | 0.010010259 |
| 11         | rs320109      | 0.501792  | 0.443139     | 0.010010259 |
| 8          | SNP_A-4212918 | 0.127698  | 0.093281     | 0.01002086  |
| 11         | rs509944      | 0.152878  | 0.199319     | 0.010026165 |
| 3          | rs2035810     | 0.548387  | 0.489612     | 0.010031473 |
| 8          | rs4573275     | 0.437276  | 0.380368     | 0.010031473 |
| 3          | rs17029875    | 0.0555556 | 0.0886658    | 0.010042097 |
| 4          | rs10003290    | 0.121864  | 0.165758     | 0.010047413 |
| 5          | rs159760      | 0.224014  | 0.178145     | 0.010047413 |
| 1          | rs2478807     | 0.442652  | 0.385851     | 0.010052733 |
| 11         | rs7110142     | 0.148746  | 0.111452     | 0.010052733 |
| 11         | rs590216      | 0.351254  | 0.297343     | 0.010052733 |
| 9          | rs545955      | 0.351254  | 0.297546     | 0.010058055 |
| 2          | rs4971766     | 0.160072  | 0.207084     | 0.010068708 |
| 13         | rs2669460     | 0.189964  | 0.240034     | 0.010068708 |
| 12         | rs9332442     | 0.449821  | 0.391431     | 0.010074039 |
| 1          | rs6684354     | 0.392473  | 0.450767     | 0.010084709 |
| 19         | rs846885      | 0.302867  | 0.252981     | 0.010084709 |
| 11         | rs12225989    | 0.197133  | 0.153951     | 0.010090049 |
| 17         | rs8077625     | 0.0451264 | 0.0752725    | 0.010095391 |
| 8          | rs2053140     | 0.446043  | 0.504777     | 0.010106085 |
| 18         | rs7234324     | 0.151625  | 0.114086     | 0.010106085 |
| 20         | rs2423366     | 0.289568  | 0.345761     | 0.010106085 |
| 2          | rs1429978     | 0.326165  | 0.272913     | 0.010111436 |
| 2          | rs4233815     | 0.284946  | 0.234673     | 0.010111436 |
| 4          | rs1503882     | 0.320144  | 0.267462     | 0.01011679  |
| 5          | rs898057      | 0.286738  | 0.236537     | 0.01011679  |
| 12         | rs10492037    | 0.0845324 | 0.0568801    | 0.01011679  |
| 13         | rs4770521     | 0.197842  | 0.155502     | 0.01011679  |
| 5          | SNP_A-4228325 | 0.143369  | 0.106195     | 0.010122147 |
| 16         | rs7199361     | 0.397849  | 0.456899     | 0.010122147 |

Table DS2: All SNPs tested for association (RDC SABP vs. controls) with the Cochran-Armitage trend test and significant at the p=0.05 threshold.

| chromosome | SNP           | MAF_cases | MAF_controls | p_value     |
|------------|---------------|-----------|--------------|-------------|
| 7          | rs12670599    | 0.315884  | 0.372232     | 0.010127507 |
| 20         | rs6057657     | 0.160072  | 0.121253     | 0.010127507 |
| 8          | rs10504493    | 0.129032  | 0.173424     | 0.01013287  |
| 10         | rs2249964     | 0.25448   | 0.308453     | 0.01013287  |
| 17         | rs2042005     | 0.379928  | 0.436968     | 0.01013287  |
| 21         | rs457581      | 0.227599  | 0.281016     | 0.01013287  |
| 9          | rs10756902    | 0.213262  | 0.264846     | 0.010138235 |
| 22         | rs17003998    | 0.137993  | 0.10242      | 0.010138235 |
| 5          | rs294142      | 0.0758123 | 0.0500171    | 0.010143604 |
| 19         | rs7248493     | 0.177419  | 0.225971     | 0.010143604 |
| 3          | rs2608426     | 0.433692  | 0.377214     | 0.010159727 |
| 9          | rs12684524    | 0.357914  | 0.303815     | 0.010159727 |
| 5          | rs10036020    | 0.416667  | 0.475315     | 0.010165107 |
| 7          | rs10278603    | 0.394265  | 0.452673     | 0.010165107 |
| 11         | rs120435      | 0.496416  | 0.437969     | 0.010165107 |
| 1          | rs12757934    | 0.378136  | 0.436797     | 0.010175877 |
| 5          | rs874158      | 0.132616  | 0.0973451    | 0.010175877 |
| 8          | rs599016      | 0.28853   | 0.238063     | 0.010186658 |
| 4          | rs11728431    | 0.0361011 | 0.0636954    | 0.010192053 |
| 7          | rs2679258     | 0.548387  | 0.489758     | 0.010192053 |
| 11         | rs10836533    | 0.362007  | 0.419646     | 0.010197451 |
| 6          | rs773678      | 0.339928  | 0.286614     | 0.010202851 |
| 8          | rs4620305     | 0.503584  | 0.44507      | 0.010208255 |
| 2          | rs1158463     | 0.0967742 | 0.067121     | 0.010213662 |
| 4          | rs1469809     | 0.116487  | 0.158587     | 0.010219071 |
| 12         | rs10849157    | 0.46223   | 0.403754     | 0.010219071 |
| 18         | rs2345034     | 0.172043  | 0.131552     | 0.010219071 |
| 19         | rs846902      | 0.302867  | 0.253078     | 0.010219071 |
| 11         | rs11039800    | 0.332734  | 0.38961      | 0.010224484 |
| 15         | rs16955177    | 0.182796  | 0.14113      | 0.010229899 |
| 16         | rs440488      | 0.268817  | 0.220633     | 0.010229899 |
| 4          | rs12505249    | 0.421147  | 0.480061     | 0.010235317 |
| 5          | rs2432175     | 0.383513  | 0.328056     | 0.010246163 |
| 7          | rs1012579     | 0.519713  | 0.460621     | 0.01025159  |
| 7          | rs281880      | 0.109319  | 0.0776567    | 0.01025159  |
| 14         | rs17121605    | 0.267025  | 0.218324     | 0.010267889 |
| 10         | rs1466653     | 0.317204  | 0.264986     | 0.01027877  |
| 4          | rs17585389    | 0.219424  | 0.271238     | 0.010284215 |
| 11         | rs2716028     | 0.342294  | 0.399387     | 0.010284215 |
| 1          | rs1414314     | 0.48741   | 0.429131     | 0.010289663 |
| 8          | rs17450934    | 0.165468  | 0.126537     | 0.010289663 |
| 17         | rs8069732     | 0.109319  | 0.15104      | 0.010289663 |
| 3          | rs10935648    | 0.401079  | 0.458816     | 0.010295114 |
| 14         | rs2332283     | 0.182796  | 0.1411       | 0.010300568 |
| 20         | rs1884764     | 0.47491   | 0.417406     | 0.010300568 |
| 21         | rs536255      | 0.228417  | 0.182765     | 0.010300568 |
| 3          | rs12690602    | 0.433692  | 0.377256     | 0.010306025 |
| 5          | rs17641748    | 0.0573477 | 0.0900886    | 0.010306025 |
| 2          | rs2202888     | 0.0942029 | 0.0649573    | 0.010311484 |
| 15         | rs7170871     | 0.105735  | 0.145947     | 0.010311484 |
| 5          | SNP_A-4286050 | 0.0985663 | 0.0686308    | 0.010316947 |
| 11         | rs1320650     | 0.309353  | 0.366689     | 0.010316947 |



Table DS2: All SNPs tested for association (RDC SABP vs. controls) with the Cochran-Armitage trend test and significant at the p=0.05 threshold.

| chromosome | SNP        | MAF_cases | MAF_controls | p_value     |
|------------|------------|-----------|--------------|-------------|
| 21         | rs1734504  | 0.395683  | 0.339639     | 0.010316947 |
| 4          | rs230525   | 0.393885  | 0.338919     | 0.010327881 |
| 10         | rs1822155  | 0.375899  | 0.434219     | 0.010327881 |
| 12         | rs11050301 | 0.261649  | 0.213556     | 0.010333353 |
| 18         | rs12965241 | 0.25      | 0.303103     | 0.010338827 |
| 6          | rs6940385  | 0.396057  | 0.340458     | 0.010344305 |
| 5          | rs11954767 | 0.270609  | 0.221655     | 0.010349785 |
| 18         | rs9959865  | 0.140288  | 0.185456     | 0.010349785 |
| 18         | rs660363   | 0.430108  | 0.373935     | 0.010349785 |
| 14         | rs10136056 | 0.532258  | 0.473415     | 0.010355269 |
| 3          | rs17660641 | 0.278777  | 0.33447      | 0.010360755 |
| 14         | rs736939   | 0.467626  | 0.410082     | 0.010371737 |
| 10         | rs16931782 | 0.111111  | 0.153218     | 0.010388232 |
| 11         | rs1545436  | 0.0647482 | 0.0993174    | 0.010388232 |
| 17         | rs216460   | 0.372302  | 0.429887     | 0.010388232 |
| 6          | rs9349422  | 0.360215  | 0.306095     | 0.010393737 |
| 1          | rs2982313  | 0.163082  | 0.209754     | 0.010399244 |
| 7          | rs849731   | 0.397112  | 0.45501      | 0.010399244 |
| 22         | rs9610489  | 0.238351  | 0.192373     | 0.010399244 |
| 3          | rs10511293 | 0.0413669 | 0.071161     | 0.010415784 |
| 7          | rs2710942  | 0.528674  | 0.469687     | 0.010415784 |
| 1          | rs6425015  | 0.548561  | 0.490624     | 0.01043788  |
| 16         | rs274094   | 0.209677  | 0.261759     | 0.01043788  |
| 2          | rs10185662 | 0.154122  | 0.201431     | 0.010443411 |
| 8          | rs10104883 | 0.109319  | 0.0780239    | 0.010443411 |
| 11         | rs226154   | 0.512545  | 0.454204     | 0.010443411 |
| 1          | rs4651115  | 0.284173  | 0.340041     | 0.010448945 |
| 18         | rs17075033 | 0.150538  | 0.113365     | 0.010448945 |
| 8          | rs4584160  | 0.503584  | 0.445315     | 0.010454483 |
| 16         | rs10514584 | 0.0591398 | 0.091715     | 0.010454483 |
| 16         | rs9941184  | 0.303957  | 0.252045     | 0.010460023 |
| 7          | rs4723349  | 0.471326  | 0.41448      | 0.010465566 |
| 9          | rs920753   | 0.299283  | 0.354734     | 0.010471113 |
| 3          | rs1376959  | 0.512545  | 0.453849     | 0.010476662 |
| 20         | rs987919   | 0.31362   | 0.261751     | 0.010476662 |
| 5          | rs2964694  | 0.363799  | 0.421635     | 0.010482215 |
| 6          | rs17058546 | 0.163082  | 0.123892     | 0.010482215 |
| 8          | rs4841197  | 0.283154  | 0.233208     | 0.010482215 |
| 1          | rs16863314 | 0.21147   | 0.167121     | 0.01048777  |
| 2          | rs17010976 | 0.157706  | 0.11921      | 0.01048777  |
| 7          | rs2371868  | 0.308244  | 0.364441     | 0.01048777  |
| 1          | rs7546928  | 0.439068  | 0.497444     | 0.010493328 |
| 15         | rs7178283  | 0.24552   | 0.298365     | 0.010493328 |
| 16         | rs8061932  | 0.200361  | 0.157167     | 0.010493328 |
| 22         | rs9610302  | 0.234767  | 0.287812     | 0.010493328 |
| 1          | rs780083   | 0.271583  | 0.326346     | 0.010510022 |
| 5          | rs295688   | 0.323741  | 0.271798     | 0.010510022 |
| 5          | rs17484600 | 0.387097  | 0.33106      | 0.010510022 |
| 8          | rs16899145 | 0.362007  | 0.307627     | 0.010515593 |
| 13         | rs7335761  | 0.24552   | 0.297985     | 0.010515593 |
| 18         | rs1348051  | 0.145161  | 0.191076     | 0.010515593 |
| 1          | rs6427299  | 0.16787   | 0.215429     | 0.010526743 |

Table DS2: All SNPs tested for association (RDC SABP vs. controls) with the Cochran-Armitage trend test and significant at the p=0.05 threshold.

| chromosome | SNP           | MAF_cases | MAF_controls | p_value     |
|------------|---------------|-----------|--------------|-------------|
| 18         | rs509620      | 0.184588  | 0.232891     | 0.010537905 |
| 11         | rs7116729     | 0.222222  | 0.176991     | 0.010543491 |
| 13         | rs9582066     | 0.0412186 | 0.0703578    | 0.010543491 |
| 6          | rs3131294     | 0.179211  | 0.137943     | 0.010549079 |
| 14         | rs3100901     | 0.252688  | 0.205251     | 0.010549079 |
| 5          | rs4866753     | 0.31362   | 0.261507     | 0.010554671 |
| 8          | rs7010270     | 0.283154  | 0.23322      | 0.010554671 |
| 2          | rs16854601    | 0.133574  | 0.178547     | 0.010560266 |
| 18         | rs8099457     | 0.0431655 | 0.0727459    | 0.010560266 |
| 2          | rs11692330    | 0.379928  | 0.325085     | 0.010565864 |
| 13         | rs1575883     | 0.510753  | 0.452657     | 0.010565864 |
| 4          | rs17088961    | 0.345878  | 0.292405     | 0.010571465 |
| 6          | rs9277542     | 0.249104  | 0.302555     | 0.010577069 |
| 13         | rs12431054    | 0.166667  | 0.127044     | 0.010577069 |
| 19         | rs924151      | 0.439068  | 0.382493     | 0.010577069 |
| 12         | rs741290      | 0.106115  | 0.14734      | 0.010588286 |
| 16         | rs9922767     | 0.22482   | 0.277324     | 0.010588286 |
| 12         | rs2053092     | 0.385305  | 0.329297     | 0.010605134 |
| 22         | rs134788      | 0.12724   | 0.17116      | 0.010605134 |
| 4          | rs9917861     | 0.261649  | 0.213726     | 0.010610757 |
| 4          | rs9994124     | 0.241877  | 0.195089     | 0.010616382 |
| 18         | rs7230070     | 0.296029  | 0.351278     | 0.010616382 |
| 8          | rs17344030    | 0.530466  | 0.472554     | 0.01062201  |
| 7          | rs3734992     | 0.306452  | 0.254682     | 0.010627642 |
| 4          | rs7694098     | 0.345878  | 0.292604     | 0.010633276 |
| 4          | rs11932737    | 0.111511  | 0.0797745    | 0.010638914 |
| 21         | rs2836411     | 0.401079  | 0.345133     | 0.010638914 |
| 6          | rs13204237    | 0.0663082 | 0.100613     | 0.010644554 |
| 11         | rs2283208     | 0.417563  | 0.475111     | 0.010644554 |
| 3          | rs2648545     | 0.498208  | 0.440041     | 0.010650198 |
| 8          | rs983273      | 0.135379  | 0.0999659    | 0.010650198 |
| 21         | rs1699927     | 0.0815217 | 0.0543776    | 0.010655845 |
| 9          | rs534517      | 0.103943  | 0.0731333    | 0.010661495 |
| 17         | rs1002446     | 0.3213    | 0.268916     | 0.010661495 |
| 3          | rs4685080     | 0.168459  | 0.215867     | 0.010667148 |
| 5          | rs2560309     | 0.225806  | 0.277532     | 0.010667148 |
| 8          | rs10481354    | 0.348921  | 0.295772     | 0.010667148 |
| 6          | rs11154557    | 0.297491  | 0.246594     | 0.010678463 |
| 10         | SNP_A-2268385 | 0.122302  | 0.0889874    | 0.010678463 |
| 11         | rs4936744     | 0.227599  | 0.182777     | 0.010678463 |
| 21         | rs2826853     | 0.535971  | 0.477846     | 0.010678463 |
| 12         | rs10161384    | 0.18705   | 0.145755     | 0.010684125 |
| 14         | rs8021692     | 0.249104  | 0.301498     | 0.010684125 |
| 1          | rs10753264    | 0.243728  | 0.196556     | 0.01068979  |
| 13         | rs9318312     | 0.469424  | 0.412176     | 0.01068979  |
| 18         | rs11872814    | 0.38172   | 0.326746     | 0.01068979  |
| 1          | rs11120613    | 0.236559  | 0.190354     | 0.010695458 |
| 18         | rs645088      | 0.430108  | 0.37419      | 0.01070113  |
| 5          | rs13158463    | 0.170251  | 0.131265     | 0.010706804 |
| 16         | rs17749681    | 0.356631  | 0.414651     | 0.010706804 |
| 8          | rs7824177     | 0.202509  | 0.159502     | 0.010712482 |
| 5          | SNP_A-1892594 | 0.236559  | 0.19033      | 0.010718162 |

Table DS2: All SNPs tested for association (RDC SABP vs. controls) with the Cochran-Armitage trend test and significant at the p=0.05 threshold.

| chromosome | SNP        | MAF_cases | MAF_controls | p_value     |
|------------|------------|-----------|--------------|-------------|
| 16         | rs2267792  | 0.37276   | 0.318151     | 0.010718162 |
| 8          | rs11777659 | 0.0376344 | 0.0659509    | 0.010723846 |
| 2          | rs4668666  | 0.129032  | 0.172402     | 0.010735223 |
| 5          | rs248695   | 0.354317  | 0.412065     | 0.010735223 |
| 16         | rs4255787  | 0.248201  | 0.201296     | 0.010735223 |
| 16         | rs9931801  | 0.198925  | 0.155472     | 0.010735223 |
| 18         | rs2733129  | 0.397482  | 0.342984     | 0.010740916 |
| 4          | rs6856121  | 0.419355  | 0.363342     | 0.010746612 |
| 4          | rs1479255  | 0.419065  | 0.362986     | 0.010746612 |
| 11         | rs1914475  | 0.370968  | 0.428206     | 0.010746612 |
| 8          | rs1026378  | 0.125448  | 0.0916837    | 0.010752311 |
| 9          | rs7864598  | 0.478495  | 0.421304     | 0.010752311 |
| 18         | rs328152   | 0.105735  | 0.146267     | 0.010752311 |
| 5          | rs6868724  | 0.456989  | 0.399557     | 0.010758013 |
| 6          | rs879856   | 0.401434  | 0.345551     | 0.010758013 |
| 2          | rs17619398 | 0.330935  | 0.386954     | 0.010780853 |
| 6          | rs3823287  | 0.136201  | 0.10075      | 0.010780853 |
| 17         | rs8065154  | 0.383513  | 0.440906     | 0.010780853 |
| 11         | rs7395454  | 0.148746  | 0.111679     | 0.010786571 |
| 15         | rs930001   | 0.496416  | 0.437607     | 0.010786571 |
| 15         | rs2062640  | 0.0776173 | 0.113613     | 0.010786571 |
| 6          | rs17137065 | 0.134409  | 0.0994212    | 0.010792292 |
| 6          | rs6909109  | 0.374101  | 0.431346     | 0.010792292 |
| 2          | rs4673905  | 0.363799  | 0.309435     | 0.010798016 |
| 11         | rs1320654  | 0.329137  | 0.38658      | 0.010798016 |
| 10         | rs1398024  | 0.249104  | 0.202251     | 0.010803743 |
| 17         | rs17763104 | 0.166065  | 0.126664     | 0.010803743 |
| 1          | rs16840224 | 0.256272  | 0.310157     | 0.010809474 |
| 3          | rs6805463  | 0.258065  | 0.210697     | 0.010815207 |
| 10         | rs2451461  | 0.317204  | 0.265317     | 0.010815207 |
| 1          | rs2284800  | 0.15233   | 0.114388     | 0.010826683 |
| 8          | rs7001739  | 0.128159  | 0.093686     | 0.010826683 |
| 8          | rs1352991  | 0.189964  | 0.14758      | 0.010826683 |
| 6          | rs9503365  | 0.120072  | 0.162866     | 0.010838172 |
| 5          | rs4323250  | 0.327338  | 0.384157     | 0.010849673 |
| 8          | rs2719276  | 0.189964  | 0.147813     | 0.010849673 |
| 21         | rs9978006  | 0.261649  | 0.314973     | 0.010861187 |
| 3          | rs2712471  | 0.390681  | 0.335887     | 0.010872713 |
| 6          | rs736864   | 0.150538  | 0.196526     | 0.010872713 |
| 9          | rs3015213  | 0.132616  | 0.0979557    | 0.010872713 |
| 3          | rs11710379 | 0.512545  | 0.454158     | 0.010878481 |
| 6          | rs9368060  | 0.383513  | 0.441488     | 0.010878481 |
| 18         | rs1371264  | 0.298561  | 0.24744      | 0.010884252 |
| 1          | rs1748041  | 0.342294  | 0.289438     | 0.010890026 |
| 1          | rs9645351  | 0.109712  | 0.151345     | 0.010895803 |
| 5          | rs1373995  | 0.444444  | 0.387679     | 0.010895803 |
| 13         | rs1323550  | 0.243728  | 0.196727     | 0.010907367 |
| 22         | rs5767699  | 0.379928  | 0.325153     | 0.010907367 |
| 2          | rs4119152  | 0.365591  | 0.3125       | 0.010913153 |
| 6          | rs2074470  | 0.355596  | 0.301604     | 0.010913153 |
| 1          | rs10753263 | 0.243728  | 0.196696     | 0.010918943 |
| 8          | rs17151209 | 0.158273  | 0.12002      | 0.010918943 |

Table DS2: All SNPs tested for association (RDC SABP vs. controls) with the Cochran-Armitage trend test and significant at the p=0.05 threshold.

| chromosome | SNP        | MAF_cases | MAF_controls | p_value     |
|------------|------------|-----------|--------------|-------------|
| 18         | rs2733126  | 0.397849  | 0.343569     | 0.010918943 |
| 2          | rs17532973 | 0.11828   | 0.16041      | 0.010924736 |
| 12         | rs10849208 | 0.111511  | 0.153584     | 0.010930532 |
| 3          | rs13059492 | 0.516129  | 0.458404     | 0.010936332 |
| 5          | rs161320   | 0.181004  | 0.229408     | 0.010936332 |
| 1          | rs1869972  | 0.378136  | 0.32368      | 0.01094794  |
| 2          | rs6724135  | 0.181159  | 0.13942      | 0.01094794  |
| 16         | rs12447968 | 0.204301  | 0.160586     | 0.01094794  |
| 5          | rs466686   | 0.101083  | 0.0706726    | 0.010953748 |
| 18         | rs3098921  | 0.350181  | 0.296555     | 0.010953748 |
| 5          | rs2011343  | 0.478495  | 0.421322     | 0.01095956  |
| 1          | rs531007   | 0.487455  | 0.429277     | 0.010965375 |
| 14         | rs12431920 | 0.182796  | 0.141641     | 0.010965375 |
| 4          | rs1520501  | 0.387097  | 0.332766     | 0.010971194 |
| 6          | rs4601089  | 0.250896  | 0.203237     | 0.010977015 |
| 15         | rs7181788  | 0.0971223 | 0.136503     | 0.010977015 |
| 9          | rs7035551  | 0.412186  | 0.356972     | 0.01098284  |
| 11         | rs11020093 | 0.203237  | 0.252809     | 0.01098284  |
| 13         | rs1072725  | 0.510753  | 0.452981     | 0.01098284  |
| 17         | rs2042004  | 0.38172   | 0.438053     | 0.01098284  |
| 10         | rs17115419 | 0.165468  | 0.126319     | 0.010988667 |
| 18         | rs7505697  | 0.428315  | 0.487223     | 0.010988667 |
| 19         | rs6509544  | 0.12724   | 0.169962     | 0.010988667 |
| 9          | rs1535964  | 0.329749  | 0.385768     | 0.010994498 |
| 18         | rs1480670  | 0.292115  | 0.242765     | 0.010994498 |
| 10         | rs7072552  | 0.0376344 | 0.0655654    | 0.011000332 |
| 22         | rs132825   | 0.17446   | 0.1343       | 0.01100617  |
| 12         | rs1915297  | 0.446237  | 0.50392      | 0.01101201  |
| 3          | rs9830013  | 0.309353  | 0.364906     | 0.011017854 |
| 4          | rs17085781 | 0.323105  | 0.271365     | 0.011023701 |
| 5          | rs11242244 | 0.241935  | 0.195674     | 0.011029551 |
| 17         | rs3729508  | 0.467742  | 0.410964     | 0.011029551 |
| 18         | rs7240727  | 0.15233   | 0.115201     | 0.011035404 |
| 2          | rs778207   | 0.326165  | 0.273485     | 0.01104126  |
| 18         | rs328154   | 0.105735  | 0.146046     | 0.011052982 |
| 11         | rs10769598 | 0.422939  | 0.48075      | 0.011058848 |
| 20         | rs4815389  | 0.302867  | 0.252131     | 0.011058848 |
| 2          | rs2396498  | 0.528674  | 0.470558     | 0.011064717 |
| 8          | rs17681489 | 0.142599  | 0.187095     | 0.011064717 |
| 7          | rs1918531  | 0.428315  | 0.48586      | 0.01107059  |
| 12         | rs12582875 | 0.133094  | 0.0979223    | 0.01107059  |
| 13         | rs9587783  | 0.102151  | 0.141664     | 0.01107059  |
| 1          | rs17102832 | 0.202509  | 0.159509     | 0.011076465 |
| 2          | rs1608575  | 0.336918  | 0.393975     | 0.011076465 |
| 3          | rs233170   | 0.139785  | 0.184372     | 0.011076465 |
| 22         | rs735853   | 0.399642  | 0.457411     | 0.011076465 |
| 1          | rs1340414  | 0.333333  | 0.389059     | 0.011082344 |
| 9          | rs10983664 | 0.306452  | 0.361234     | 0.011082344 |
| 12         | rs4930808  | 0.206835  | 0.256997     | 0.011082344 |
| 22         | rs5757184  | 0.078853  | 0.115411     | 0.011082344 |
| 4          | rs17230634 | 0.428315  | 0.372355     | 0.011088226 |
| 4          | rs677114   | 0.114695  | 0.0825375    | 0.011088226 |

Table DS2: All SNPs tested for association (RDC SABP vs. controls) with the Cochran-Armitage trend test and significant at the p=0.05 threshold.

| chromosome | SNP        | MAF_cases | MAF_controls | p_value     |
|------------|------------|-----------|--------------|-------------|
| 10         | rs1935961  | 0.534173  | 0.475784     | 0.011088226 |
| 2          | rs10172684 | 0.299283  | 0.354586     | 0.011094111 |
| 7          | rs1693380  | 0.234767  | 0.189479     | 0.011105891 |
| 18         | rs328140   | 0.105735  | 0.146067     | 0.011105891 |
| 8          | rs10504494 | 0.129032  | 0.172743     | 0.011111786 |
| 10         | rs7911097  | 0.503584  | 0.445711     | 0.011111786 |
| 12         | rs7969125  | 0.155914  | 0.117597     | 0.011111786 |
| 14         | rs745696   | 0.341727  | 0.289196     | 0.011111786 |
| 8          | rs2289496  | 0.326165  | 0.382924     | 0.011117684 |
| 12         | rs7309371  | 0.421147  | 0.478698     | 0.011117684 |
| 6          | rs17137008 | 0.0380435 | 0.066803     | 0.011123585 |
| 2          | rs2029076  | 0.290614  | 0.240375     | 0.011129489 |
| 7          | rs10244689 | 0.455197  | 0.398911     | 0.011135397 |
| 10         | rs11007760 | 0.496416  | 0.438692     | 0.011135397 |
| 4          | rs10031194 | 0.168459  | 0.216207     | 0.011141308 |
| 6          | rs12202107 | 0.297491  | 0.246848     | 0.011147222 |
| 15         | rs12905612 | 0.393885  | 0.338781     | 0.011147222 |
| 19         | rs4805131  | 0.167266  | 0.214845     | 0.011147222 |
| 7          | rs2536149  | 0.149281  | 0.112057     | 0.011153139 |
| 1          | rs835341   | 0.412186  | 0.470458     | 0.011164983 |
| 12         | rs2041382  | 0.462366  | 0.404811     | 0.01117091  |
| 17         | rs9915612  | 0.0953237 | 0.13415      | 0.01117091  |
| 9          | rs10758475 | 0.19964   | 0.156729     | 0.01117684  |
| 10         | rs10786820 | 0.318996  | 0.26728      | 0.01117684  |
| 9          | rs1329557  | 0.299283  | 0.354394     | 0.01119465  |
| 5          | rs1862613  | 0.265233  | 0.319065     | 0.011200593 |
| 6          | rs4711896  | 0.359712  | 0.306105     | 0.011200593 |
| 7          | rs2205542  | 0.0752688 | 0.111546     | 0.011200593 |
| 1          | rs1498313  | 0.349462  | 0.406101     | 0.011206539 |
| 2          | rs1381817  | 0.116487  | 0.083816     | 0.011212489 |
| 18         | rs12458580 | 0.249104  | 0.202182     | 0.011212489 |
| 1          | rs10917186 | 0.219424  | 0.270386     | 0.011218442 |
| 21         | rs954616   | 0.340502  | 0.396828     | 0.011218442 |
| 18         | rs642633   | 0.429856  | 0.374149     | 0.011224398 |
| 1          | rs4651299  | 0.544964  | 0.487394     | 0.011230357 |
| 7          | rs802467   | 0.456835  | 0.400239     | 0.011230357 |
| 15         | rs11633914 | 0.437276  | 0.49421      | 0.011230357 |
| 1          | rs1371143  | 0.178058  | 0.137432     | 0.011248255 |
| 2          | rs10928451 | 0.302867  | 0.25196      | 0.011248255 |
| 9          | rs10512036 | 0.311828  | 0.367121     | 0.011248255 |
| 12         | rs10492224 | 0.157706  | 0.203476     | 0.011254227 |
| 1          | rs640718   | 0.0896057 | 0.0613497    | 0.011260202 |
| 4          | rs230519   | 0.394928  | 0.340444     | 0.011266181 |
| 11         | rs17133656 | 0.349462  | 0.296561     | 0.011266181 |
| 18         | rs328149   | 0.105735  | 0.145876     | 0.011266181 |
| 6          | rs6569672  | 0.297491  | 0.246937     | 0.011272163 |
| 11         | rs7937671  | 0.224014  | 0.275715     | 0.011278149 |
| 18         | rs1822448  | 0.485507  | 0.427596     | 0.011278149 |
| 14         | rs17115324 | 0.369176  | 0.315458     | 0.011284137 |
| 16         | rs12932433 | 0.333333  | 0.280729     | 0.011284137 |
| 17         | rs17631111 | 0.227599  | 0.182515     | 0.011284137 |
| 1          | rs12741629 | 0.505396  | 0.446758     | 0.011290129 |

Table DS2: All SNPs tested for association (RDC SABP vs. controls) with the Cochran-Armitage trend test and significant at the p=0.05 threshold.

| chromosome | SNP        | MAF_cases | MAF_controls | p_value     |
|------------|------------|-----------|--------------|-------------|
| 6          | rs7772529  | 0.370504  | 0.316274     | 0.011290129 |
| 8          | rs12542369 | 0.291367  | 0.241227     | 0.011290129 |
| 3          | rs9840922  | 0.0557554 | 0.0879945    | 0.011296124 |
| 8          | rs6577810  | 0.177419  | 0.225153     | 0.011296124 |
| 6          | rs7765437  | 0.177419  | 0.137649     | 0.011302123 |
| 8          | rs7000710  | 0.165468  | 0.126705     | 0.011308124 |
| 12         | rs11105192 | 0.188172  | 0.146687     | 0.011308124 |
| 16         | rs11075148 | 0.143369  | 0.188608     | 0.011308124 |
| 5          | rs17313823 | 0.232975  | 0.1875       | 0.011314129 |
| 13         | rs3168693  | 0.308244  | 0.257663     | 0.011314129 |
| 1          | rs2786484  | 0.0896057 | 0.0610505    | 0.011320137 |
| 3          | rs2035658  | 0.372302  | 0.318337     | 0.011320137 |
| 7          | rs1507599  | 0.290323  | 0.34491      | 0.011320137 |
| 1          | rs546191   | 0.197133  | 0.246937     | 0.011326149 |
| 5          | rs11241959 | 0.442652  | 0.500511     | 0.011326149 |
| 7          | rs1968059  | 0.33871   | 0.394074     | 0.011326149 |
| 10         | rs2484456  | 0.25448   | 0.307522     | 0.011332164 |
| 11         | rs2879747  | 0.157706  | 0.120396     | 0.011332164 |
| 5          | rs17053040 | 0.0573477 | 0.0899011    | 0.011338182 |
| 10         | rs10795384 | 0.340502  | 0.288317     | 0.011344203 |
| 2          | rs12053013 | 0.546595  | 0.488733     | 0.011350228 |
| 6          | rs9398069  | 0.435484  | 0.379346     | 0.011350228 |
| 6          | rs6928411  | 0.544803  | 0.487726     | 0.011350228 |
| 11         | rs7107869  | 0.376344  | 0.321965     | 0.011350228 |
| 6          | rs7772495  | 0.297491  | 0.247019     | 0.011356255 |
| 19         | rs10416843 | 0.462366  | 0.40576      | 0.011362287 |
| 1          | rs6680817  | 0.0827338 | 0.0558773    | 0.0113804   |
| 4          | rs6824846  | 0.0967742 | 0.0674387    | 0.0113804   |
| 11         | rs1792229  | 0.141577  | 0.185967     | 0.011386444 |
| 2          | rs10865346 | 0.471223  | 0.414709     | 0.011392492 |
| 3          | rs16839096 | 0.242806  | 0.295392     | 0.011392492 |
| 6          | rs9350612  | 0.378136  | 0.324504     | 0.011392492 |
| 6          | rs9403799  | 0.327957  | 0.384497     | 0.011392492 |
| 11         | rs2904315  | 0.256272  | 0.309159     | 0.011392492 |
| 8          | rs16884099 | 0.129032  | 0.0947924    | 0.011398543 |
| 3          | rs6443099  | 0.456989  | 0.399796     | 0.011404597 |
| 3          | rs2141180  | 0.421147  | 0.365169     | 0.011404597 |
| 5          | rs270654   | 0.0740072 | 0.110429     | 0.011404597 |
| 5          | rs4920937  | 0.301075  | 0.356025     | 0.011410654 |
| 5          | rs7707544  | 0.327957  | 0.38413      | 0.011410654 |
| 8          | rs4489355  | 0.177419  | 0.225102     | 0.011410654 |
| 17         | rs806942   | 0.402878  | 0.346758     | 0.011410654 |
| 22         | rs5769740  | 0.21147   | 0.167918     | 0.011410654 |
| 18         | rs8094002  | 0.429856  | 0.374532     | 0.011416715 |
| 2          | rs895526   | 0.137993  | 0.182453     | 0.011422779 |
| 5          | rs2059886  | 0.292115  | 0.347071     | 0.011428847 |
| 1          | rs11207621 | 0.285971  | 0.339536     | 0.011434917 |
| 4          | rs4235261  | 0.132616  | 0.17634      | 0.011434917 |
| 11         | rs10894784 | 0.27957   | 0.334129     | 0.011434917 |
| 2          | rs1440048  | 0.489247  | 0.431903     | 0.011440992 |
| 3          | rs1349285  | 0.272401  | 0.223814     | 0.011440992 |
| 3          | rs17073477 | 0.453405  | 0.397375     | 0.01145315  |

Table DS2: All SNPs tested for association (RDC SABP vs. controls) with the Cochran-Armitage trend test and significant at the p=0.05 threshold.

| chromosome | SNP        | MAF_cases | MAF_controls | p_value     |
|------------|------------|-----------|--------------|-------------|
| 10         | rs7899038  | 0.25      | 0.303407     | 0.01145315  |
| 11         | rs3886607  | 0.47491   | 0.418259     | 0.01145315  |
| 5          | rs1896664  | 0.397849  | 0.454731     | 0.011459234 |
| 6          | rs9371352  | 0.387097  | 0.443914     | 0.011459234 |
| 3          | rs9830696  | 0.154122  | 0.116303     | 0.011465321 |
| 7          | rs6460798  | 0.317204  | 0.373124     | 0.011465321 |
| 2          | rs12994943 | 0.0752688 | 0.111414     | 0.011471411 |
| 7          | rs10279000 | 0.5       | 0.44234      | 0.011477505 |
| 11         | rs11039858 | 0.397849  | 0.454871     | 0.011477505 |
| 8          | rs10504705 | 0.205036  | 0.162171     | 0.011483603 |
| 11         | rs747601   | 0.232014  | 0.284474     | 0.011483603 |
| 22         | rs9613477  | 0.194245  | 0.152248     | 0.011483603 |
| 2          | rs534781   | 0.11828   | 0.0861187    | 0.011489703 |
| 1          | rs4515823  | 0.4319    | 0.489608     | 0.011495807 |
| 14         | rs2415769  | 0.09319   | 0.0646537    | 0.011495807 |
| 9          | rs473159   | 0.345878  | 0.402181     | 0.011508025 |
| 13         | rs9544536  | 0.0304659 | 0.0571282    | 0.011508025 |
| 14         | rs221698   | 0.0773381 | 0.0516184    | 0.011508025 |
| 1          | rs3121983  | 0.21147   | 0.167575     | 0.011514139 |
| 8          | rs1443952  | 0.286738  | 0.341397     | 0.011514139 |
| 1          | rs550948   | 0.433692  | 0.377941     | 0.011520256 |
| 5          | rs437499   | 0.284946  | 0.339523     | 0.011526377 |
| 1          | rs12139561 | 0.0755396 | 0.0501364    | 0.011532501 |
| 2          | rs7561481  | 0.546595  | 0.488764     | 0.011532501 |
| 2          | rs1485055  | 0.120504  | 0.0879945    | 0.011538628 |
| 3          | rs4676898  | 0.505396  | 0.4477       | 0.011538628 |
| 8          | rs7824377  | 0.286738  | 0.341335     | 0.011538628 |
| 9          | rs629518   | 0.384892  | 0.330774     | 0.011544758 |
| 13         | rs1753782  | 0.446237  | 0.389799     | 0.011544758 |
| 15         | rs1354102  | 0.0681004 | 0.10242      | 0.011544758 |
| 1          | rs3738365  | 0.200717  | 0.158101     | 0.011550892 |
| 1          | rs930323   | 0.197133  | 0.154872     | 0.01155703  |
| 2          | rs13410077 | 0.268817  | 0.322597     | 0.01155703  |
| 5          | rs4869262  | 0.274194  | 0.327886     | 0.01156317  |
| 7          | rs3113126  | 0.544964  | 0.487555     | 0.011569314 |
| 2          | rs1607445  | 0.5       | 0.443535     | 0.011575462 |
| 13         | rs206337   | 0.239209  | 0.19312      | 0.011575462 |
| 10         | rs726175   | 0.236559  | 0.190614     | 0.011581612 |
| 4          | rs4130912  | 0.116487  | 0.157922     | 0.011587766 |
| 4          | rs6840816  | 0.5       | 0.44215      | 0.011600084 |
| 18         | rs323122   | 0.0809353 | 0.117537     | 0.011600084 |
| 21         | rs4816958  | 0.501799  | 0.444293     | 0.011600084 |
| 1          | rs4507990  | 0.246403  | 0.200239     | 0.011612416 |
| 7          | rs2971769  | 0.444444  | 0.387811     | 0.011612416 |
| 11         | rs11039515 | 0.204301  | 0.253576     | 0.011618587 |
| 18         | rs11152402 | 0.317204  | 0.266769     | 0.011618587 |
| 1          | rs11590326 | 0.329137  | 0.277342     | 0.011624761 |
| 12         | rs2190733  | 0.140288  | 0.184668     | 0.011624761 |
| 15         | rs8039405  | 0.4319    | 0.489434     | 0.011624761 |
| 22         | rs738415   | 0.0503597 | 0.0810351    | 0.011624761 |
| 3          | rs17060205 | 0.0842294 | 0.121212     | 0.011630939 |
| 8          | rs7824655  | 0.0716846 | 0.0473019    | 0.011630939 |

Table DS2: All SNPs tested for association (RDC SABP vs. controls) with the Cochran-Armitage trend test and significant at the p=0.05 threshold.

| chromosome | SNP        | MAF_cases | MAF_controls | p_value     |
|------------|------------|-----------|--------------|-------------|
| 10         | rs10509420 | 0.241935  | 0.29516      | 0.011649492 |
| 20         | rs6024821  | 0.196043  | 0.245318     | 0.011649492 |
| 7          | rs2237420  | 0.25448   | 0.306671     | 0.011655683 |
| 11         | rs11029650 | 0.376344  | 0.322037     | 0.011661877 |
| 20         | rs6030385  | 0.145161  | 0.189502     | 0.011661877 |
| 3          | rs9863228  | 0.363309  | 0.419816     | 0.011674276 |
| 11         | rs11232921 | 0.327957  | 0.276091     | 0.011674276 |
| 5          | rs7705219  | 0.25448   | 0.207396     | 0.011680481 |
| 7          | rs2530309  | 0.129496  | 0.172743     | 0.011680481 |
| 20         | rs6015716  | 0.267025  | 0.219591     | 0.011680481 |
| 13         | rs4365181  | 0.122302  | 0.0891883    | 0.0116929   |
| 5          | rs6449611  | 0.134409  | 0.177876     | 0.011699115 |
| 13         | rs4770403  | 0.229391  | 0.184408     | 0.011699115 |
| 1          | rs454751   | 0.370504  | 0.427282     | 0.011711555 |
| 13         | rs17252720 | 0.292115  | 0.242916     | 0.011711555 |
| 22         | rs16979683 | 0.3213    | 0.269625     | 0.01171778  |
| 1          | rs527241   | 0.375899  | 0.432732     | 0.011724008 |
| 2          | rs6756666  | 0.440647  | 0.383737     | 0.011724008 |
| 3          | rs16847698 | 0.273381  | 0.224796     | 0.011724008 |
| 5          | rs1021004  | 0.25448   | 0.207467     | 0.011736475 |
| 6          | rs13198841 | 0.0985663 | 0.137432     | 0.011742713 |
| 20         | rs6030407  | 0.0394265 | 0.067609     | 0.011742713 |
| 8          | rs11784191 | 0.53405   | 0.476847     | 0.011748955 |
| 1          | rs2131556  | 0.270609  | 0.221597     | 0.011755201 |
| 7          | rs3812340  | 0.282374  | 0.336116     | 0.011755201 |
| 18         | rs328136   | 0.106115  | 0.146217     | 0.011755201 |
| 10         | rs1934952  | 0.268817  | 0.323329     | 0.011761449 |
| 5          | rs10073086 | 0.327957  | 0.383776     | 0.011767701 |
| 16         | rs1728419  | 0.120939  | 0.0879046    | 0.011767701 |
| 14         | rs2293732  | 0.438849  | 0.382794     | 0.011773957 |
| 9          | rs3118941  | 0.0740072 | 0.109877     | 0.011780216 |
| 12         | rs4760222  | 0.351254  | 0.407899     | 0.011780216 |
| 3          | rs6443090  | 0.210432  | 0.167745     | 0.011786478 |
| 5          | rs10075495 | 0.177419  | 0.13796      | 0.011786478 |
| 4          | rs3805257  | 0.38172   | 0.32731      | 0.011792744 |
| 13         | rs17471107 | 0.261649  | 0.214237     | 0.011792744 |
| 5          | rs786843   | 0.304659  | 0.254514     | 0.011799014 |
| 11         | rs10766066 | 0.238351  | 0.290971     | 0.011799014 |
| 2          | rs17735152 | 0.26259   | 0.214164     | 0.011805286 |
| 1          | rs1264913  | 0.0967742 | 0.067632     | 0.011811562 |
| 3          | rs11708862 | 0.274194  | 0.328898     | 0.011817842 |
| 3          | rs11718187 | 0.290909  | 0.346246     | 0.011817842 |
| 7          | rs2191995  | 0.492806  | 0.435308     | 0.011824125 |
| 16         | rs4327045  | 0.141818  | 0.186348     | 0.011830411 |
| 4          | rs10856838 | 0.100358  | 0.139277     | 0.011836701 |
| 7          | rs11238181 | 0.315412  | 0.264225     | 0.011836701 |
| 12         | rs7981014  | 0.234657  | 0.188502     | 0.011836701 |
| 5          | rs2973628  | 0.242806  | 0.196629     | 0.011842994 |
| 5          | rs883774   | 0.154122  | 0.19918      | 0.011842994 |
| 15         | rs7182997  | 0.501812  | 0.444463     | 0.011842994 |
| 20         | rs2012168  | 0.193548  | 0.152011     | 0.011842994 |
| 1          | rs651844   | 0.248201  | 0.301363     | 0.011855591 |



Table DS2: All SNPs tested for association (RDC SABP vs. controls) with the Cochran-Armitage trend test and significant at the p=0.05 threshold.

| chromosome | SNP        | MAF_cases | MAF_controls | p_value     |
|------------|------------|-----------|--------------|-------------|
| 6          | rs910037   | 0.215827  | 0.171838     | 0.011861895 |
| 9          | rs10868394 | 0.379928  | 0.325272     | 0.011861895 |
| 1          | rs11161511 | 0.261649  | 0.31491      | 0.011868201 |
| 8          | rs13273033 | 0.281362  | 0.232277     | 0.011868201 |
| 17         | rs1124918  | 0.34767   | 0.294037     | 0.011868201 |
| 10         | rs1468063  | 0.136201  | 0.100919     | 0.011874512 |
| 20         | rs8115505  | 0.301075  | 0.250766     | 0.011874512 |
| 2          | rs17044605 | 0.172662  | 0.220368     | 0.011880826 |
| 2          | rs1991564  | 0.263441  | 0.215746     | 0.011880826 |
| 3          | rs473702   | 0.421147  | 0.365509     | 0.011887143 |
| 6          | rs3734435  | 0.374552  | 0.321721     | 0.011893464 |
| 3          | rs13091420 | 0.440647  | 0.384812     | 0.011899788 |
| 21         | rs9974219  | 0.18705   | 0.236116     | 0.011899788 |
| 10         | rs7898545  | 0.353047  | 0.408828     | 0.011906116 |
| 13         | rs17604551 | 0.078853  | 0.0531442    | 0.011906116 |
| 1          | rs10801774 | 0.403226  | 0.348382     | 0.011912447 |
| 2          | rs12105249 | 0.0716846 | 0.106814     | 0.011912447 |
| 5          | rs11739206 | 0.109319  | 0.0779973    | 0.011912447 |
| 8          | rs13260353 | 0.0359712 | 0.0635002    | 0.011912447 |
| 8          | rs3133762  | 0.308664  | 0.257581     | 0.011912447 |
| 5          | rs2401810  | 0.326165  | 0.382153     | 0.011918782 |
| 18         | rs17663994 | 0.31362   | 0.368439     | 0.011918782 |
| 5          | rs258060   | 0.282374  | 0.337598     | 0.01192512  |
| 8          | rs6995069  | 0.341155  | 0.398432     | 0.01192512  |
| 14         | rs17121610 | 0.265233  | 0.217621     | 0.011931461 |
| 6          | rs9397747  | 0.387097  | 0.44365      | 0.011937806 |
| 17         | rs16955918 | 0.0412186 | 0.0696008    | 0.011950507 |
| 20         | rs11906748 | 0.376344  | 0.322856     | 0.011950507 |
| 8          | rs12674762 | 0.283154  | 0.233992     | 0.011963221 |
| 17         | rs4796751  | 0.183453  | 0.14293      | 0.011963221 |
| 20         | rs6070411  | 0.483871  | 0.426842     | 0.011963221 |
| 12         | rs11056380 | 0.226619  | 0.181849     | 0.011969583 |
| 4          | rs7695956  | 0.232975  | 0.188117     | 0.011975949 |
| 5          | rs245202   | 0.343525  | 0.290801     | 0.011982318 |
| 18         | rs6506058  | 0.0573477 | 0.0894683    | 0.011982318 |
| 14         | rs2371808  | 0.228417  | 0.184175     | 0.011988691 |
| 9          | rs2891188  | 0.125899  | 0.0921635    | 0.011995067 |
| 13         | rs9315724  | 0.191756  | 0.240381     | 0.011995067 |
| 20         | rs890613   | 0.0896057 | 0.0618188    | 0.012001447 |
| 11         | rs10767749 | 0.399642  | 0.456218     | 0.01200783  |
| 1          | rs17410154 | 0.393885  | 0.450767     | 0.012020607 |
| 4          | rs7438590  | 0.227599  | 0.27882      | 0.012020607 |
| 14         | rs10145685 | 0.0967742 | 0.067632     | 0.012020607 |
| 2          | rs1344923  | 0.530466  | 0.473424     | 0.012027001 |
| 7          | rs17330921 | 0.213262  | 0.26279      | 0.012027001 |
| 14         | rs2124675  | 0.252688  | 0.205963     | 0.012027001 |
| 17         | rs8071407  | 0.18638   | 0.234652     | 0.012033398 |
| 18         | rs539632   | 0.232975  | 0.188586     | 0.012033398 |
| 10         | rs2814184  | 0.548387  | 0.491315     | 0.012039798 |
| 4          | rs1440940  | 0.322581  | 0.271643     | 0.012046203 |
| 18         | rs12605617 | 0.247312  | 0.300273     | 0.01205261  |
| 2          | rs1519768  | 0.31362   | 0.368699     | 0.012059021 |

Table DS2: All SNPs tested for association (RDC SABP vs. controls) with the Cochran-Armitage trend test and significant at the p=0.05 threshold.

| chromosome | SNP        | MAF_cases | MAF_controls | p_value     |
|------------|------------|-----------|--------------|-------------|
| 8          | rs17732285 | 0.0519713 | 0.0831346    | 0.012059021 |
| 2          | rs2344734  | 0.221223  | 0.177744     | 0.012065436 |
| 3          | rs7627066  | 0.464029  | 0.40802      | 0.012078276 |
| 11         | rs3849161  | 0.551971  | 0.49455      | 0.012084701 |
| 13         | rs7328260  | 0.159498  | 0.20429      | 0.012084701 |
| 1          | rs7516175  | 0.107527  | 0.147871     | 0.01209113  |
| 1          | rs6424819  | 0.120504  | 0.162411     | 0.012097562 |
| 2          | rs9679315  | 0.169065  | 0.216672     | 0.012097562 |
| 8          | rs2023121  | 0.435484  | 0.379393     | 0.012103998 |
| 15         | rs11638609 | 0.385305  | 0.441527     | 0.012103998 |
| 18         | rs328150   | 0.105735  | 0.145343     | 0.012103998 |
| 18         | rs1943391  | 0.365591  | 0.312713     | 0.012103998 |
| 2          | rs2705853  | 0.487455  | 0.431252     | 0.01211688  |
| 5          | rs10035262 | 0.177419  | 0.137902     | 0.01211688  |
| 17         | rs4459604  | 0.362007  | 0.308623     | 0.01211688  |
| 1          | rs17100780 | 0.0949821 | 0.0658836    | 0.012123326 |
| 2          | rs6433032  | 0.284946  | 0.235865     | 0.012123326 |
| 3          | rs11128317 | 0.401079  | 0.458106     | 0.012129776 |
| 4          | rs17022415 | 0.057554  | 0.0899183    | 0.012129776 |
| 10         | rs11596795 | 0.0377698 | 0.065247     | 0.012129776 |
| 10         | rs17790693 | 0.154676  | 0.117587     | 0.012129776 |
| 18         | rs9960039  | 0.317204  | 0.26703      | 0.012129776 |
| 18         | rs8084088  | 0.182796  | 0.142224     | 0.012136229 |
| 3          | rs13326767 | 0.189964  | 0.239449     | 0.012142686 |
| 21         | rs571227   | 0.311828  | 0.261491     | 0.012142686 |
| 8          | rs3808580  | 0.342294  | 0.289779     | 0.01215561  |
| 6          | rs1886985  | 0.378136  | 0.324923     | 0.012162078 |
| 6          | rs2314090  | 0.379928  | 0.326694     | 0.012168549 |
| 4          | rs11732754 | 0.478417  | 0.421886     | 0.012175023 |
| 16         | rs11647652 | 0.517986  | 0.46167      | 0.012175023 |
| 2          | rs10495872 | 0.157706  | 0.120437     | 0.012181501 |
| 2          | rs984066   | 0.158273  | 0.204801     | 0.012181501 |
| 2          | rs11904082 | 0.478495  | 0.422396     | 0.012181501 |
| 10         | rs10733978 | 0.473118  | 0.417547     | 0.012181501 |
| 12         | rs11063525 | 0.102151  | 0.141982     | 0.012181501 |
| 14         | rs17793827 | 0.0967742 | 0.0676781    | 0.012181501 |
| 14         | rs10483670 | 0.24552   | 0.199693     | 0.012194468 |
| 12         | rs4765870  | 0.339928  | 0.288133     | 0.012200956 |
| 18         | rs3910788  | 0.362007  | 0.308939     | 0.012200956 |
| 19         | rs11668856 | 0.365591  | 0.421268     | 0.012200956 |
| 20         | rs7348905  | 0.304659  | 0.254428     | 0.012200956 |
| 8          | rs7823957  | 0.307554  | 0.256812     | 0.012207449 |
| 6          | rs2451688  | 0.154122  | 0.116814     | 0.012220444 |
| 12         | rs17042391 | 0.215827  | 0.17229      | 0.012226947 |
| 10         | rs2941683  | 0.396057  | 0.453194     | 0.012233453 |
| 14         | rs8007286  | 0.369176  | 0.316076     | 0.012233453 |
| 1          | rs10489513 | 0.345878  | 0.400681     | 0.012239963 |
| 2          | rs11897150 | 0.51259   | 0.455677     | 0.012239963 |
| 19         | rs17637922 | 0.202509  | 0.160061     | 0.012239963 |
| 10         | rs7082215  | 0.0665468 | 0.100272     | 0.012246477 |
| 1          | rs431966   | 0.258065  | 0.310838     | 0.012259514 |
| 2          | rs13026824 | 0.535971  | 0.47906      | 0.012259514 |

Table DS2: All SNPs tested for association (RDC SABP vs. controls) with the Cochran-Armitage trend test and significant at the p=0.05 threshold.

| chromosome | SNP           | MAF_cases | MAF_controls | p_value     |
|------------|---------------|-----------|--------------|-------------|
| 2          | rs16851773    | 0.268817  | 0.322888     | 0.012266038 |
| 11         | rs10501798    | 0.241935  | 0.293086     | 0.012266038 |
| 11         | rs17617000    | 0.159498  | 0.121718     | 0.012266038 |
| 5          | rs2594869     | 0.379496  | 0.43667      | 0.012279098 |
| 8          | rs3133760     | 0.307554  | 0.256895     | 0.012279098 |
| 10         | rs12414475    | 0.250896  | 0.2046       | 0.012279098 |
| 11         | rs10838805    | 0.204301  | 0.253149     | 0.012279098 |
| 4          | rs7662249     | 0.419065  | 0.363931     | 0.012285633 |
| 7          | rs10500146    | 0.073741  | 0.0486348    | 0.012292171 |
| 10         | rs11009744    | 0.392473  | 0.337935     | 0.012292171 |
| 2          | rs17659633    | 0.0358423 | 0.0637572    | 0.012298713 |
| 18         | rs485266      | 0.18638   | 0.145947     | 0.012298713 |
| 6          | rs9386159     | 0.494624  | 0.438032     | 0.012305259 |
| 12         | rs10751695    | 0.444444  | 0.500511     | 0.012311808 |
| 18         | rs949024      | 0.175627  | 0.22298      | 0.012318361 |
| 3          | rs2213255     | 0.257194  | 0.210311     | 0.012324917 |
| 6          | rs2651317     | 0.521505  | 0.463751     | 0.012331477 |
| 14         | rs17109110    | 0.18231   | 0.141689     | 0.012331477 |
| 4          | SNP_A-1828738 | 0.0806452 | 0.0539666    | 0.012338041 |
| 16         | rs1672866     | 0.241935  | 0.195808     | 0.012338041 |
| 2          | rs6759106     | 0.116906  | 0.15785      | 0.012344608 |
| 13         | rs2762051     | 0.229391  | 0.184219     | 0.012344608 |
| 6          | rs9351298     | 0.437276  | 0.38148      | 0.012351179 |
| 21         | rs11701162    | 0.227599  | 0.278175     | 0.012351179 |
| 1          | rs7415831     | 0.0519713 | 0.0831629    | 0.012357753 |
| 4          | rs7680061     | 0.256272  | 0.309751     | 0.012357753 |
| 4          | rs955186      | 0.377698  | 0.434412     | 0.012357753 |
| 13         | rs9558995     | 0.453405  | 0.39799      | 0.012357753 |
| 1          | rs3845443     | 0.120504  | 0.16207      | 0.012364331 |
| 18         | rs17059738    | 0.138989  | 0.103761     | 0.012364331 |
| 1          | rs267866      | 0.102151  | 0.142005     | 0.012370912 |
| 17         | rs981684      | 0.508961  | 0.452624     | 0.012370912 |
| 18         | rs11875353    | 0.0935252 | 0.131776     | 0.012370912 |
| 2          | rs1435566     | 0.234767  | 0.189438     | 0.012384086 |
| 7          | rs1015122     | 0.159498  | 0.2046       | 0.012384086 |
| 18         | rs328137      | 0.105735  | 0.145321     | 0.012384086 |
| 3          | rs6438925     | 0.0665468 | 0.100681     | 0.012390679 |
| 8          | rs6980831     | 0.27957   | 0.230926     | 0.012397275 |
| 8          | rs7835900     | 0.222222  | 0.178134     | 0.012397275 |
| 12         | rs7485874     | 0.447842  | 0.391067     | 0.012397275 |
| 13         | rs10492570    | 0.151079  | 0.196118     | 0.012397275 |
| 3          | rs1992985     | 0.272401  | 0.224285     | 0.012403874 |
| 11         | rs4545536     | 0.268817  | 0.220463     | 0.012410477 |
| 13         | rs9594738     | 0.537634  | 0.479748     | 0.012417084 |
| 14         | rs2049787     | 0.394265  | 0.339529     | 0.012417084 |
| 4          | rs1000647     | 0.0985663 | 0.0689949    | 0.012430308 |
| 19         | rs7259543     | 0.365591  | 0.421124     | 0.012430308 |
| 1          | rs6664930     | 0.52509   | 0.467484     | 0.012436926 |
| 7          | rs451408      | 0.0878136 | 0.125256     | 0.012436926 |
| 2          | rs1878640     | 0.0537634 | 0.0852079    | 0.012443547 |
| 6          | rs126854      | 0.215827  | 0.172173     | 0.012443547 |
| 3          | rs995538      | 0.142086  | 0.186521     | 0.012450172 |

Table DS2: All SNPs tested for association (RDC SABP vs. controls) with the Cochran-Armitage trend test and significant at the p=0.05 threshold.

| chromosome | SNP           | MAF_cases | MAF_controls | p_value     |
|------------|---------------|-----------|--------------|-------------|
| 3          | rs10936408    | 0.272401  | 0.224344     | 0.012450172 |
| 6          | rs1018155     | 0.28853   | 0.341729     | 0.012450172 |
| 2          | rs2113650     | 0.09319   | 0.130835     | 0.012456801 |
| 5          | rs4869452     | 0.394265  | 0.450477     | 0.012456801 |
| 11         | rs17582926    | 0.0866426 | 0.124104     | 0.012463433 |
| 14         | rs10140997    | 0.0878136 | 0.125128     | 0.012463433 |
| 6          | rs4959895     | 0.155914  | 0.201635     | 0.012476708 |
| 6          | rs220749      | 0.338129  | 0.394162     | 0.012483351 |
| 14         | rs7142493     | 0.323741  | 0.272232     | 0.012483351 |
| 16         | rs2387823     | 0.397849  | 0.454731     | 0.012483351 |
| 7          | rs2396971     | 0.399281  | 0.455897     | 0.012489998 |
| 7          | rs17165701    | 0.347122  | 0.294719     | 0.012489998 |
| 1          | rs1494461     | 0.268817  | 0.321866     | 0.012503302 |
| 13         | rs1924575     | 0.0412186 | 0.0695534    | 0.012503302 |
| 5          | rs2914908     | 0.526978  | 0.469475     | 0.012509959 |
| 14         | rs17106805    | 0.057554  | 0.0896869    | 0.012509959 |
| 3          | rs13089163    | 0.16065   | 0.122313     | 0.01251662  |
| 2          | rs6741742     | 0.129496  | 0.171492     | 0.012529954 |
| 9          | rs1390141     | 0.517921  | 0.461329     | 0.012529954 |
| 9          | rs10156623    | 0.3213    | 0.270897     | 0.012536626 |
| 9          | rs1467575     | 0.480216  | 0.424139     | 0.012536626 |
| 12         | rs703664      | 0.0752688 | 0.111168     | 0.012536626 |
| 14         | rs911664      | 0.446237  | 0.39029      | 0.012536626 |
| 4          | rs12504652    | 0.24552   | 0.200205     | 0.012543302 |
| 9          | rs7045097     | 0.379928  | 0.436011     | 0.012543302 |
| 2          | rs17287105    | 0.292115  | 0.242589     | 0.012549981 |
| 5          | rs6883816     | 0.25448   | 0.20802      | 0.012549981 |
| 7          | rs2717829     | 0.129496  | 0.172296     | 0.012549981 |
| 10         | rs2763336     | 0.442238  | 0.387108     | 0.012556664 |
| 11         | rs4542391     | 0.268817  | 0.220538     | 0.012556664 |
| 5          | rs4976373     | 0.222222  | 0.178353     | 0.012570041 |
| 11         | rs11237896    | 0.155914  | 0.118699     | 0.012570041 |
| 10         | rs11598684    | 0.34767   | 0.403308     | 0.012583433 |
| 13         | rs9300690     | 0.548387  | 0.491635     | 0.012583433 |
| 16         | rs154657      | 0.480287  | 0.42402      | 0.012583433 |
| 11         | rs4307711     | 0.120072  | 0.160538     | 0.012596839 |
| 15         | rs4886927     | 0.0770609 | 0.0514305    | 0.012596839 |
| 15         | rs4775178     | 0.270609  | 0.323108     | 0.012603548 |
| 3          | rs10513823    | 0.129032  | 0.0953354    | 0.012610261 |
| 10         | rs2394276     | 0.473118  | 0.416809     | 0.012610261 |
| 11         | rs1565760     | 0.375899  | 0.322086     | 0.012610261 |
| 17         | rs4795781     | 0.181004  | 0.141323     | 0.012610261 |
| 11         | SNP_A-4198403 | 0.145161  | 0.109348     | 0.012616977 |
| 18         | rs1522723     | 0.317204  | 0.267303     | 0.012616977 |
| 9          | rs2381635     | 0.526882  | 0.470518     | 0.012623696 |
| 20         | rs6079637     | 0.231183  | 0.186138     | 0.012623696 |
| 2          | rs939369      | 0.378136  | 0.324352     | 0.01263042  |
| 5          | rs1428926     | 0.243728  | 0.294588     | 0.01263042  |
| 16         | rs258590      | 0.306452  | 0.361622     | 0.01263042  |
| 8          | rs7823086     | 0.290323  | 0.241062     | 0.012637147 |
| 9          | rs1927105     | 0.130824  | 0.0970048    | 0.012637147 |
| 11         | rs11039871    | 0.332734  | 0.387922     | 0.012637147 |

Table DS2: All SNPs tested for association (RDC SABP vs. controls) with the Cochran-Armitage trend test and significant at the p=0.05 threshold.

| chromosome | SNP        | MAF_cases | MAF_controls | p_value     |
|------------|------------|-----------|--------------|-------------|
| 11         | rs226151   | 0.510753  | 0.45408      | 0.012637147 |
| 5          | rs3961976  | 0.0935252 | 0.131471     | 0.012643878 |
| 7          | rs6962332  | 0.401079  | 0.346508     | 0.012643878 |
| 18         | rs4940044  | 0.444444  | 0.389154     | 0.012643878 |
| 5          | rs2061636  | 0.137184  | 0.102083     | 0.012650612 |
| 6          | rs7751620  | 0.24552   | 0.199114     | 0.012650612 |
| 21         | rs162355   | 0.16129   | 0.20785      | 0.012650612 |
| 5          | rs10054104 | 0.0827338 | 0.11891      | 0.01265735  |
| 6          | rs3131025  | 0.353047  | 0.300409     | 0.01265735  |
| 11         | rs621381   | 0.456835  | 0.401296     | 0.01265735  |
| 3          | rs10511359 | 0.274194  | 0.328109     | 0.012664092 |
| 8          | rs12677146 | 0.392473  | 0.338446     | 0.012664092 |
| 11         | rs6589086  | 0.396057  | 0.453306     | 0.012664092 |
| 3          | rs4854872  | 0.0379061 | 0.0654477    | 0.012670838 |
| 19         | rs3922314  | 0.469534  | 0.413288     | 0.012670838 |
| 1          | rs875727   | 0.0719424 | 0.106948     | 0.012691096 |
| 15         | rs4274405  | 0.286738  | 0.23842      | 0.012691096 |
| 1          | rs7367700  | 0.519784  | 0.463323     | 0.012697857 |
| 4          | rs10020542 | 0.114695  | 0.0830208    | 0.012697857 |
| 4          | rs1125145  | 0.392473  | 0.449523     | 0.012697857 |
| 6          | rs6901152  | 0.473118  | 0.417292     | 0.012704621 |
| 15         | rs4340286  | 0.185921  | 0.234003     | 0.012704621 |
| 21         | rs11088309 | 0.102888  | 0.141956     | 0.012704621 |
| 2          | rs17022516 | 0.102151  | 0.14062      | 0.01271816  |
| 3          | rs17568755 | 0.259928  | 0.212751     | 0.01271816  |
| 1          | rs11579007 | 0.498195  | 0.441948     | 0.012724935 |
| 4          | rs6857726  | 0.270609  | 0.222885     | 0.012724935 |
| 6          | rs2216917  | 0.476703  | 0.421008     | 0.012724935 |
| 13         | rs12428595 | 0.307554  | 0.257669     | 0.012724935 |
| 9          | rs2812344  | 0.293907  | 0.347573     | 0.012731714 |
| 5          | rs13328187 | 0.215054  | 0.264646     | 0.012738496 |
| 21         | rs2826852  | 0.53405   | 0.477311     | 0.012738496 |
| 11         | rs367164   | 0.318996  | 0.374404     | 0.012745283 |
| 8          | rs7009173  | 0.155914  | 0.118569     | 0.012752073 |
| 22         | rs6006733  | 0.388889  | 0.335493     | 0.012758866 |
| 1          | rs1251551  | 0.315412  | 0.37061      | 0.01277927  |
| 9          | rs10975552 | 0.32554   | 0.380594     | 0.01277927  |
| 16         | rs4283241  | 0.412186  | 0.468984     | 0.01277927  |
| 22         | rs16993099 | 0.0734767 | 0.0487057    | 0.01277927  |
| 5          | rs6452631  | 0.265233  | 0.318724     | 0.012786078 |
| 13         | rs1410113  | 0.532258  | 0.475264     | 0.012786078 |
| 5          | rs16893106 | 0.0358423 | 0.0633084    | 0.012792891 |
| 12         | rs11062038 | 0.340502  | 0.289142     | 0.012799707 |
| 11         | rs12363571 | 0.365591  | 0.422029     | 0.012806527 |
| 9          | rs4744020  | 0.30036   | 0.354344     | 0.01281335  |
| 13         | rs2031295  | 0.206093  | 0.255203     | 0.01281335  |
| 1          | rs7546563  | 0.335125  | 0.390119     | 0.012827008 |
| 1          | rs10797964 | 0.34767   | 0.403473     | 0.012827008 |
| 4          | rs7660140  | 0.100358  | 0.0708917    | 0.012833843 |
| 11         | rs7947980  | 0.148746  | 0.112645     | 0.012833843 |
| 13         | rs7323078  | 0.0304659 | 0.0564461    | 0.012833843 |
| 5          | rs13165359 | 0.160072  | 0.122613     | 0.012840682 |

Table DS2: All SNPs tested for association (RDC SABP vs. controls) with the Cochran-Armitage trend test and significant at the p=0.05 threshold.

| chromosome | SNP           | MAF_cases | MAF_controls | p_value     |
|------------|---------------|-----------|--------------|-------------|
| 6          | rs2765943     | 0.0719424 | 0.106303     | 0.012840682 |
| 7          | rs1014547     | 0.510753  | 0.454685     | 0.012840682 |
| 4          | rs9884587     | 0.222222  | 0.272139     | 0.01285437  |
| 13         | rs9511813     | 0.396057  | 0.451992     | 0.01285437  |
| 13         | rs11620370    | 0.342294  | 0.289806     | 0.01285437  |
| 14         | rs11159510    | 0.228261  | 0.184264     | 0.01285437  |
| 20         | rs2424494     | 0.387097  | 0.442419     | 0.01285437  |
| 3          | rs1049296     | 0.215054  | 0.171832     | 0.012861219 |
| 7          | rs3793299     | 0.283394  | 0.336571     | 0.012861219 |
| 2          | rs2396500     | 0.528777  | 0.471711     | 0.012868073 |
| 7          | rs17568303    | 0.18638   | 0.145585     | 0.012881791 |
| 8          | rs16923447    | 0.157706  | 0.202726     | 0.012881791 |
| 6          | rs151719      | 0.281362  | 0.23297      | 0.012888656 |
| 21         | rs743466      | 0.102518  | 0.141297     | 0.012888656 |
| 1          | rs12239580    | 0.329749  | 0.385048     | 0.012895524 |
| 6          | rs9355850     | 0.172043  | 0.133367     | 0.012895524 |
| 11         | rs882979      | 0.17446   | 0.220648     | 0.012895524 |
| 3          | rs1436824     | 0.315412  | 0.369802     | 0.012902397 |
| 8          | rs2898461     | 0.483871  | 0.428158     | 0.012902397 |
| 17         | rs6502632     | 0.361511  | 0.308478     | 0.012902397 |
| 21         | rs978008      | 0.476619  | 0.420102     | 0.012902397 |
| 1          | rs4233125     | 0.543165  | 0.486726     | 0.012909273 |
| 6          | rs12525800    | 0.55036   | 0.493861     | 0.012929923 |
| 11         | rs3824946     | 0.302867  | 0.357654     | 0.012929923 |
| 3          | rs9869179     | 0.27518   | 0.329243     | 0.012943709 |
| 3          | rs7626385     | 0.510753  | 0.45377      | 0.012943709 |
| 17         | rs4643387     | 0.362007  | 0.309134     | 0.012943709 |
| 4          | rs1371774     | 0.249104  | 0.203199     | 0.012950608 |
| 10         | rs16932781    | 0.129032  | 0.170923     | 0.012950608 |
| 11         | rs643014      | 0.111111  | 0.080348     | 0.012950608 |
| 13         | rs1536284     | 0.469534  | 0.413681     | 0.01295751  |
| 2          | rs7587916     | 0.31769   | 0.372954     | 0.012964416 |
| 11         | rs10832616    | 0.177419  | 0.224361     | 0.012964416 |
| 8          | rs436753      | 0.179856  | 0.139857     | 0.012971326 |
| 15         | rs7178422     | 0.397849  | 0.454174     | 0.012971326 |
| 2          | SNP_A-1932873 | 0.173835  | 0.220879     | 0.01297824  |
| 2          | rs9808497     | 0.18638   | 0.233992     | 0.01297824  |
| 18         | rs9959663     | 0.473118  | 0.416695     | 0.012985158 |
| 2          | rs1971877     | 0.306452  | 0.256725     | 0.012992079 |
| 1          | rs10908528    | 0.245487  | 0.199897     | 0.012999004 |
| 2          | rs11125555    | 0.292115  | 0.243699     | 0.012999004 |
| 1          | rs2992650     | 0.366426  | 0.422014     | 0.013005933 |
| 6          | rs3117039     | 0.360215  | 0.416553     | 0.013012866 |
| 8          | rs17748677    | 0.143369  | 0.186882     | 0.013012866 |
| 8          | rs10109232    | 0.0663082 | 0.0991468    | 0.013012866 |
| 19         | rs11668892    | 0.365591  | 0.420784     | 0.013012866 |
| 2          | rs1020678     | 0.302867  | 0.35668      | 0.013019803 |
| 9          | rs7019439     | 0.11828   | 0.159973     | 0.013019803 |
| 4          | rs2196983     | 0.322581  | 0.272139     | 0.013026743 |
| 3          | rs12638937    | 0.0519713 | 0.0829642    | 0.013033687 |
| 3          | rs1354211     | 0.318841  | 0.373765     | 0.013033687 |
| 22         | rs9613476     | 0.193548  | 0.152366     | 0.013040635 |

Table DS2: All SNPs tested for association (RDC SABP vs. controls) with the Cochran-Armitage trend test and significant at the p=0.05 threshold.

| chromosome | SNP        | MAF_cases | MAF_controls | p_value     |
|------------|------------|-----------|--------------|-------------|
| 6          | rs9294327  | 0.114695  | 0.0829642    | 0.013047587 |
| 4          | rs4234981  | 0.418773  | 0.475988     | 0.013054542 |
| 9          | rs260221   | 0.34767   | 0.29588      | 0.013061502 |
| 8          | rs890315   | 0.4319    | 0.375937     | 0.013068465 |
| 7          | rs6463750  | 0.374552  | 0.321477     | 0.013075432 |
| 7          | rs887822   | 0.23741   | 0.288855     | 0.013075432 |
| 18         | rs11151159 | 0.145683  | 0.190225     | 0.013075432 |
| 6          | rs794100   | 0.169675  | 0.130887     | 0.013089377 |
| 6          | rs9503735  | 0.327957  | 0.277078     | 0.013096356 |
| 13         | rs9562532  | 0.274368  | 0.226389     | 0.013096356 |
| 15         | rs7163029  | 0.0770609 | 0.0514831    | 0.013096356 |
| 6          | rs515259   | 0.25      | 0.203488     | 0.013103338 |
| 6          | rs760855   | 0.356631  | 0.304229     | 0.013110324 |
| 14         | rs17442995 | 0.175627  | 0.222846     | 0.013110324 |
| 4          | rs7659988  | 0.27957   | 0.332822     | 0.013117314 |
| 9          | rs4978098  | 0.170251  | 0.131131     | 0.013117314 |
| 22         | rs4838823  | 0.27957   | 0.231674     | 0.013117314 |
| 2          | rs12467460 | 0.25      | 0.302587     | 0.013124308 |
| 12         | rs7305621  | 0.418773  | 0.363032     | 0.013131306 |
| 6          | rs17058533 | 0.16129   | 0.123505     | 0.013138307 |
| 13         | rs8001140  | 0.333333  | 0.38796      | 0.013145312 |
| 7          | rs10274515 | 0.419355  | 0.364828     | 0.013152321 |
| 11         | rs12283211 | 0.274194  | 0.226422     | 0.013159334 |
| 15         | rs2679098  | 0.22043   | 0.177842     | 0.013159334 |
| 3          | rs1375832  | 0.272401  | 0.224685     | 0.013173372 |
| 10         | rs12776743 | 0.139785  | 0.104528     | 0.013180396 |
| 11         | rs1567352  | 0.376344  | 0.322998     | 0.013180396 |
| 1          | rs4911997  | 0.429856  | 0.374829     | 0.013187425 |
| 2          | rs13012745 | 0.102888  | 0.141397     | 0.013194457 |
| 2          | rs12477902 | 0.146953  | 0.190996     | 0.013194457 |
| 5          | rs10900751 | 0.311828  | 0.261263     | 0.013194457 |
| 9          | rs11138278 | 0.204301  | 0.162121     | 0.013201493 |
| 12         | rs12296857 | 0.0681004 | 0.101294     | 0.013208533 |
| 15         | rs2245899  | 0.369176  | 0.424599     | 0.013208533 |
| 18         | rs2219281  | 0.494624  | 0.438181     | 0.013208533 |
| 18         | rs8092980  | 0.28777   | 0.23936      | 0.013215577 |
| 4          | rs1983212  | 0.458781  | 0.40283      | 0.013222624 |
| 1          | rs1329125  | 0.375899  | 0.322427     | 0.013229676 |
| 8          | rs10958095 | 0.293478  | 0.347284     | 0.013229676 |
| 10         | rs2394277  | 0.473118  | 0.41715      | 0.013229676 |
| 17         | rs1561902  | 0.378136  | 0.434004     | 0.013229676 |
| 13         | rs2002748  | 0.161871  | 0.124275     | 0.013236731 |
| 13         | rs4771391  | 0.385305  | 0.332083     | 0.013243791 |
| 3          | rs6781474  | 0.182796  | 0.230429     | 0.013250854 |
| 9          | rs7850497  | 0.378136  | 0.433686     | 0.013250854 |
| 5          | rs17141409 | 0.315412  | 0.265108     | 0.013257921 |
| 2          | rs13002945 | 0.173835  | 0.220688     | 0.013272066 |
| 3          | rs1913295  | 0.229391  | 0.279993     | 0.013272066 |
| 8          | rs983270   | 0.134409  | 0.10017      | 0.013272066 |
| 5          | rs294041   | 0.15343   | 0.199353     | 0.013279145 |
| 16         | rs16954729 | 0.172043  | 0.133527     | 0.013279145 |
| 1          | rs10911042 | 0.405018  | 0.461001     | 0.013286227 |

Table DS2: All SNPs tested for association (RDC SABP vs. controls) with the Cochran-Armitage trend test and significant at the p=0.05 threshold.

| chromosome | SNP           | MAF_cases | MAF_controls | p_value     |
|------------|---------------|-----------|--------------|-------------|
| 2          | rs3748872     | 0.387097  | 0.333504     | 0.013286227 |
| 4          | rs4860767     | 0.155914  | 0.118812     | 0.013286227 |
| 5          | rs702085      | 0.491007  | 0.433834     | 0.013286227 |
| 10         | rs1915429     | 0.324373  | 0.273099     | 0.013286227 |
| 17         | rs806941      | 0.399642  | 0.344857     | 0.013286227 |
| 6          | rs587437      | 0.34767   | 0.402967     | 0.013293314 |
| 8          | rs13282410    | 0.202509  | 0.251875     | 0.013293314 |
| 12         | rs10161245    | 0.411871  | 0.358507     | 0.013293314 |
| 16         | rs8055236     | 0.15233   | 0.197785     | 0.013293314 |
| 17         | rs8075374     | 0.147482  | 0.111452     | 0.013293314 |
| 5          | rs1154758     | 0.395683  | 0.451415     | 0.013300404 |
| 13         | rs1104539     | 0.344086  | 0.292816     | 0.013300404 |
| 5          | rs294143      | 0.076087  | 0.0509543    | 0.013307498 |
| 15         | rs2239994     | 0.134058  | 0.0990791    | 0.013307498 |
| 12         | rs10506250    | 0.166667  | 0.212338     | 0.013314596 |
| 17         | rs11080277    | 0.354839  | 0.303066     | 0.013314596 |
| 9          | rs7874261     | 0.263441  | 0.216474     | 0.013321698 |
| 7          | rs12673136    | 0.311828  | 0.366951     | 0.013328804 |
| 13         | rs1337276     | 0.342294  | 0.396593     | 0.013335914 |
| 3          | rs2196427     | 0.523297  | 0.46661      | 0.013343028 |
| 17         | rs4969183     | 0.53405   | 0.47735      | 0.013343028 |
| 19         | rs12710309    | 0.111111  | 0.0801839    | 0.013343028 |
| 13         | rs9513027     | 0.16129   | 0.207425     | 0.013350145 |
| 21         | rs9974455     | 0.263441  | 0.315395     | 0.013357267 |
| 3          | rs11714658    | 0.322581  | 0.377301     | 0.013364392 |
| 6          | rs6902173     | 0.546595  | 0.49081      | 0.013364392 |
| 7          | rs10245818    | 0.213262  | 0.170698     | 0.013364392 |
| 11         | rs11604455    | 0.0809353 | 0.116303     | 0.013371521 |
| 2          | rs12478788    | 0.238351  | 0.288632     | 0.013378654 |
| 3          | rs4600836     | 0.194245  | 0.152877     | 0.013378654 |
| 2          | rs10495701    | 0.115108  | 0.0832766    | 0.013392932 |
| 11         | rs4601750     | 0.310036  | 0.259973     | 0.013392932 |
| 8          | rs12682345    | 0.330935  | 0.279632     | 0.013400077 |
| 16         | rs8043793     | 0.44964   | 0.39506      | 0.013400077 |
| 5          | rs211001      | 0.191756  | 0.23936      | 0.013407226 |
| 17         | rs7212961     | 0.202509  | 0.160416     | 0.013407226 |
| 2          | rs17032064    | 0.197133  | 0.155824     | 0.013414379 |
| 2          | rs16824247    | 0.420863  | 0.36653      | 0.013414379 |
| 5          | SNP_A-1980406 | 0.374101  | 0.321185     | 0.013414379 |
| 9          | rs16907484    | 0.136201  | 0.102044     | 0.013414379 |
| 5          | rs10940327    | 0.435018  | 0.492339     | 0.013421536 |
| 8          | rs6984857     | 0.505396  | 0.449438     | 0.013421536 |
| 17         | rs4924832     | 0.361511  | 0.308728     | 0.013421536 |
| 4          | rs12054628    | 0.125448  | 0.167007     | 0.013443029 |
| 6          | rs9343942     | 0.267025  | 0.219687     | 0.013443029 |
| 2          | rs2246050     | 0.235612  | 0.190996     | 0.013450202 |
| 3          | rs10935649    | 0.402878  | 0.458433     | 0.013450202 |
| 13         | rs9544109     | 0.252708  | 0.304608     | 0.013450202 |
| 5          | rs11242337    | 0.449458  | 0.393769     | 0.013457378 |
| 11         | SNP_A-1865513 | 0.216846  | 0.266519     | 0.013457378 |
| 2          | rs13387608    | 0.350719  | 0.405535     | 0.013464558 |
| 4          | rs1396691     | 0.0985663 | 0.136457     | 0.013471743 |



Table DS2: All SNPs tested for association (RDC SABP vs. controls) with the Cochran-Armitage trend test and significant at the p=0.05 threshold.

| chromosome | SNP           | MAF_cases | MAF_controls | p_value     |
|------------|---------------|-----------|--------------|-------------|
| 2          | rs6437123     | 0.299283  | 0.352641     | 0.013478931 |
| 5          | rs463102      | 0.152878  | 0.198432     | 0.013478931 |
| 7          | rs2024235     | 0.203237  | 0.160976     | 0.013478931 |
| 2          | rs2166906     | 0.173835  | 0.220613     | 0.013493319 |
| 18         | rs7228353     | 0.270609  | 0.322828     | 0.013493319 |
| 6          | rs1150644     | 0.302867  | 0.253917     | 0.013500519 |
| 6          | rs659675      | 0.255396  | 0.307364     | 0.013500519 |
| 8          | rs16904944    | 0.145683  | 0.189932     | 0.013507723 |
| 9          | rs869563      | 0.318345  | 0.268746     | 0.013507723 |
| 17         | rs12952920    | 0.191756  | 0.151329     | 0.013507723 |
| 1          | rs900890      | 0.296763  | 0.350375     | 0.013514931 |
| 5          | rs387238      | 0.491007  | 0.434745     | 0.013522143 |
| 9          | rs1593270     | 0.0748175 | 0.109764     | 0.013522143 |
| 1          | rs7417430     | 0.357401  | 0.30494      | 0.013529358 |
| 5          | rs257796      | 0.47482   | 0.419305     | 0.013529358 |
| 5          | rs17798594    | 0.0448029 | 0.0737649    | 0.013529358 |
| 1          | rs1032534     | 0.0519713 | 0.0831346    | 0.013536578 |
| 3          | rs1394597     | 0.274194  | 0.327704     | 0.013536578 |
| 10         | rs7911065     | 0.399281  | 0.455832     | 0.013536578 |
| 14         | rs912343      | 0.229391  | 0.185261     | 0.013536578 |
| 18         | rs4796972     | 0.261649  | 0.214749     | 0.013536578 |
| 2          | rs7607596     | 0.157706  | 0.120913     | 0.013543802 |
| 8          | rs3898982     | 0.190647  | 0.150102     | 0.013543802 |
| 10         | rs7075861     | 0.302867  | 0.35746      | 0.01355103  |
| 15         | rs3743046     | 0.395307  | 0.451228     | 0.01355103  |
| 18         | rs12455715    | 0.123656  | 0.165075     | 0.01355103  |
| 2          | rs1364648     | 0.297834  | 0.247866     | 0.013558261 |
| 4          | SNP_A-1941634 | 0.250903  | 0.30256      | 0.013558261 |
| 3          | rs4688658     | 0.131295  | 0.173476     | 0.013572737 |
| 12         | rs7960515     | 0.482014  | 0.426014     | 0.013572737 |
| 1          | rs7512365     | 0.196043  | 0.244127     | 0.01357998  |
| 3          | rs4686228     | 0.415771  | 0.361035     | 0.013587228 |
| 8          | rs1660333     | 0.444444  | 0.390252     | 0.013616258 |
| 15         | rs4776065     | 0.242806  | 0.293286     | 0.013616258 |
| 3          | rs7622435     | 0.465827  | 0.410672     | 0.013630797 |
| 12         | rs7397851     | 0.146953  | 0.111395     | 0.013630797 |
| 20         | rs2425530     | 0.116487  | 0.156719     | 0.013630797 |
| 6          | rs9503015     | 0.444444  | 0.389816     | 0.013638072 |
| 18         | rs12964110    | 0.145161  | 0.188862     | 0.013638072 |
| 2          | rs17451360    | 0.172662  | 0.133231     | 0.013645352 |
| 6          | rs10485355    | 0.148746  | 0.192216     | 0.013652635 |
| 10         | rs1007740     | 0.473118  | 0.417405     | 0.013652635 |
| 16         | rs2967134     | 0.111111  | 0.151175     | 0.013652635 |
| 8          | rs746917      | 0.11828   | 0.158603     | 0.013667214 |
| 9          | rs2027383     | 0.263441  | 0.216672     | 0.013667214 |
| 5          | rs6450151     | 0.435484  | 0.492499     | 0.013674509 |
| 20         | rs6100856     | 0.268817  | 0.222317     | 0.013674509 |
| 4          | rs10517464    | 0.183453  | 0.230664     | 0.013681809 |
| 8          | rs7816535     | 0.224014  | 0.180266     | 0.013681809 |
| 13         | rs9285282     | 0.206093  | 0.254682     | 0.013681809 |
| 16         | rs7198299     | 0.22043   | 0.270344     | 0.013689112 |
| 1          | rs12759145    | 0.424731  | 0.370358     | 0.01369642  |

Table DS2: All SNPs tested for association (RDC SABP vs. controls) with the Cochran-Armitage trend test and significant at the p=0.05 threshold.

| chromosome | SNP           | MAF_cases | MAF_controls | p_value     |
|------------|---------------|-----------|--------------|-------------|
| 2          | rs1002666     | 0.193141  | 0.24165      | 0.01369642  |
| 15         | rs4603514     | 0.333333  | 0.282527     | 0.013703731 |
| 16         | rs1651189     | 0.422939  | 0.368906     | 0.013703731 |
| 14         | rs4902904     | 0.362007  | 0.417971     | 0.013718366 |
| 11         | rs10734562    | 0.204301  | 0.2523       | 0.01372569  |
| 6          | rs583072      | 0.491039  | 0.434753     | 0.013733017 |
| 12         | rs7310555     | 0.259928  | 0.213456     | 0.013733017 |
| 16         | rs8060234     | 0.508961  | 0.452965     | 0.013740349 |
| 11         | rs7104221     | 0.312274  | 0.26253      | 0.013747685 |
| 5          | rs2069662     | 0.0358423 | 0.0627986    | 0.013755024 |
| 6          | rs706216      | 0.249104  | 0.202997     | 0.013755024 |
| 6          | rs2206980     | 0.527076  | 0.4712       | 0.013755024 |
| 22         | rs1115764     | 0.224014  | 0.180702     | 0.013755024 |
| 5          | rs7701403     | 0.285971  | 0.237398     | 0.013762368 |
| 5          | rs11242245    | 0.353047  | 0.301262     | 0.013762368 |
| 16         | rs1477389     | 0.258065  | 0.310415     | 0.013762368 |
| 3          | rs6806186     | 0.492806  | 0.436094     | 0.013769716 |
| 4          | SNP_A-2152782 | 0.120072  | 0.160873     | 0.013769716 |
| 5          | rs2290697     | 0.435484  | 0.492502     | 0.013769716 |
| 18         | rs1157104     | 0.151079  | 0.195334     | 0.013769716 |
| 1          | rs11265455    | 0.115942  | 0.156816     | 0.013777067 |
| 3          | rs233164      | 0.140794  | 0.184219     | 0.013777067 |
| 3          | rs17041614    | 0.0519713 | 0.0826798    | 0.013784423 |
| 18         | rs4891961     | 0.0899281 | 0.126576     | 0.013784423 |
| 5          | rs308271      | 0.224014  | 0.179898     | 0.013791783 |
| 11         | rs12221729    | 0.181004  | 0.227924     | 0.013791783 |
| 12         | rs11059508    | 0.150538  | 0.19486      | 0.013799147 |
| 18         | rs9304421     | 0.362007  | 0.30984      | 0.013799147 |
| 18         | rs4892037     | 0.181004  | 0.227954     | 0.013799147 |
| 17         | rs4795658     | 0.242806  | 0.197991     | 0.013806515 |
| 21         | rs11088696    | 0.322581  | 0.272541     | 0.013813887 |
| 1          | rs235487      | 0.354317  | 0.302726     | 0.013821263 |
| 20         | rs6027495     | 0.265233  | 0.219027     | 0.013821263 |
| 4          | rs2681339     | 0.102888  | 0.0728172    | 0.013828643 |
| 14         | rs10873339    | 0.378136  | 0.325665     | 0.013828643 |
| 2          | rs901466      | 0.270609  | 0.223415     | 0.013836027 |
| 18         | rs637828      | 0.408602  | 0.464894     | 0.013836027 |
| 5          | rs1433608     | 0.200717  | 0.159176     | 0.013843415 |
| 3          | rs6803572     | 0.140288  | 0.104993     | 0.013850807 |
| 8          | rs16923480    | 0.157706  | 0.202146     | 0.013858203 |
| 11         | rs1519073     | 0.222222  | 0.271876     | 0.013858203 |
| 6          | rs7741196     | 0.548561  | 0.492667     | 0.013865604 |
| 12         | rs11057572    | 0.0412186 | 0.0691417    | 0.013865604 |
| 1          | rs4501824     | 0.412186  | 0.468835     | 0.013873008 |
| 5          | rs10454920    | 0.311828  | 0.261864     | 0.013873008 |
| 11         | rs170487      | 0.494624  | 0.438629     | 0.013873008 |
| 12         | rs7967289     | 0.165468  | 0.211172     | 0.013873008 |
| 4          | rs1495607     | 0.197133  | 0.244543     | 0.013887829 |
| 2          | rs10173261    | 0.0770609 | 0.0515358    | 0.013895246 |
| 12         | rs4759490     | 0.384892  | 0.440745     | 0.013895246 |
| 22         | rs1569437     | 0.390681  | 0.337935     | 0.013895246 |
| 22         | rs4838832     | 0.27957   | 0.232119     | 0.013895246 |

Table DS2: All SNPs tested for association (RDC SABP vs. controls) with the Cochran-Armitage trend test and significant at the p=0.05 threshold.

| chromosome | SNP           | MAF_cases | MAF_controls | p_value     |
|------------|---------------|-----------|--------------|-------------|
| 13         | rs9518494     | 0.548387  | 0.492337     | 0.013902666 |
| 7          | rs765855      | 0.290323  | 0.343164     | 0.013910091 |
| 2          | rs6705692     | 0.143369  | 0.187372     | 0.01391752  |
| 10         | rs686441      | 0.353791  | 0.409401     | 0.01391752  |
| 2          | rs11886734    | 0.179211  | 0.225477     | 0.013924953 |
| 5          | rs1989919     | 0.263441  | 0.217058     | 0.013924953 |
| 7          | rs1030268     | 0.214801  | 0.264585     | 0.013924953 |
| 2          | rs4614937     | 0.232014  | 0.282253     | 0.01393239  |
| 2          | rs7577417     | 0.198925  | 0.157464     | 0.01393239  |
| 4          | rs17375440    | 0.256272  | 0.210221     | 0.01393239  |
| 6          | rs973093      | 0.256272  | 0.307981     | 0.01393239  |
| 4          | rs6824459     | 0.284946  | 0.338215     | 0.013939831 |
| 6          | rs794602      | 0.138489  | 0.181538     | 0.013939831 |
| 20         | rs6081362     | 0.318996  | 0.268733     | 0.013939831 |
| 20         | rs2425754     | 0.184116  | 0.144001     | 0.013939831 |
| 20         | rs6027497     | 0.265233  | 0.21908      | 0.013947276 |
| 6          | rs11154581    | 0.0899281 | 0.0621382    | 0.013954726 |
| 6          | SNP_A-4293886 | 0.112903  | 0.081716     | 0.013962179 |
| 16         | rs9929165     | 0.358423  | 0.306446     | 0.013962179 |
| 5          | rs10039805    | 0.512545  | 0.457226     | 0.013969636 |
| 8          | rs1788174     | 0.446043  | 0.39192      | 0.013969636 |
| 8          | rs6989968     | 0.435484  | 0.380457     | 0.013969636 |
| 21         | rs2830909     | 0.143885  | 0.187415     | 0.013969636 |
| 7          | SNP_A-2253825 | 0.143369  | 0.186605     | 0.013984564 |
| 11         | rs10500830    | 0.177419  | 0.223792     | 0.013984564 |
| 2          | rs4669550     | 0.129032  | 0.170657     | 0.013992033 |
| 5          | rs30466       | 0.401434  | 0.348449     | 0.013992033 |
| 5          | rs620498      | 0.197133  | 0.156335     | 0.013992033 |
| 13         | rs7986101     | 0.397849  | 0.344986     | 0.013992033 |
| 12         | rs1530833     | 0.265233  | 0.218889     | 0.013999507 |
| 18         | rs12606011    | 0.285199  | 0.338501     | 0.013999507 |
| 2          | rs4973006     | 0.545126  | 0.488745     | 0.014006985 |
| 11         | rs609996      | 0.378136  | 0.324821     | 0.014006985 |
| 22         | rs135826      | 0.150538  | 0.114598     | 0.014006985 |
| 4          | rs6855295     | 0.498201  | 0.441567     | 0.014021954 |
| 8          | rs1660351     | 0.446237  | 0.39226      | 0.014021954 |
| 13         | rs2018051     | 0.164875  | 0.127257     | 0.014021954 |
| 1          | rs1687064     | 0.231183  | 0.187073     | 0.014036938 |
| 5          | rs10075735    | 0.446237  | 0.390897     | 0.014036938 |
| 2          | rs1961609     | 0.102888  | 0.0732289    | 0.014044437 |
| 4          | rs10024026    | 0.242806  | 0.197548     | 0.01405194  |
| 8          | rs10101449    | 0.363799  | 0.419052     | 0.01405194  |
| 21         | rs462840      | 0.18638   | 0.233651     | 0.01405194  |
| 22         | rs6006743     | 0.390681  | 0.33799      | 0.01405194  |
| 1          | rs2794600     | 0.252688  | 0.206233     | 0.014059446 |
| 9          | rs3808709     | 0.250896  | 0.301941     | 0.014059446 |
| 3          | rs6549953     | 0.546595  | 0.49046      | 0.014066957 |
| 22         | rs2015453     | 0.284946  | 0.237138     | 0.014066957 |
| 3          | rs3804859     | 0.173835  | 0.135356     | 0.014074472 |
| 8          | rs2736340     | 0.293165  | 0.244884     | 0.014074472 |
| 8          | rs10086522    | 0.240143  | 0.290729     | 0.014074472 |
| 18         | rs6567247     | 0.358423  | 0.414651     | 0.014074472 |

Table DS2: All SNPs tested for association (RDC SABP vs. controls) with the Cochran-Armitage trend test and significant at the p=0.05 threshold.

| chromosome | SNP           | MAF_cases | MAF_controls | p_value     |
|------------|---------------|-----------|--------------|-------------|
| 3          | rs9838594     | 0.258993  | 0.21256      | 0.014081992 |
| 1          | rs638425      | 0.200717  | 0.159905     | 0.014089515 |
| 4          | rs1595856     | 0.240143  | 0.195297     | 0.014089515 |
| 5          | rs12332549    | 0.163082  | 0.125427     | 0.014097042 |
| 1          | rs7555906     | 0.543011  | 0.487394     | 0.014104574 |
| 5          | rs7733275     | 0.0394265 | 0.0671667    | 0.014104574 |
| 5          | SNP_A-2196258 | 0.0394265 | 0.0672455    | 0.014104574 |
| 9          | rs10756904    | 0.18638   | 0.233549     | 0.014104574 |
| 1          | rs2814091     | 0.284946  | 0.236726     | 0.01411211  |
| 11         | rs11212474    | 0.159498  | 0.122271     | 0.01411211  |
| 13         | rs12430992    | 0.120072  | 0.161164     | 0.01411211  |
| 1          | rs4532841     | 0.121864  | 0.163314     | 0.01411965  |
| 11         | rs7949294     | 0.379496  | 0.325708     | 0.01411965  |
| 14         | rs986055      | 0.378136  | 0.325843     | 0.01411965  |
| 6          | rs1145908     | 0.394265  | 0.340436     | 0.014127194 |
| 8          | rs12680762    | 0.320789  | 0.271253     | 0.014127194 |
| 7          | rs10261581    | 0.205036  | 0.162973     | 0.014134742 |
| 9          | rs11792190    | 0.234767  | 0.286055     | 0.014134742 |
| 3          | rs2921253     | 0.389892  | 0.336689     | 0.014142294 |
| 3          | rs2724721     | 0.17446   | 0.135481     | 0.014142294 |
| 1          | rs10911813    | 0.448029  | 0.503575     | 0.014149851 |
| 4          | rs1483597     | 0.241935  | 0.197718     | 0.014157411 |
| 22         | rs9621489     | 0.285971  | 0.23838      | 0.014157411 |
| 1          | rs6424722     | 0.303957  | 0.254859     | 0.014164976 |
| 18         | rs12963193    | 0.38172   | 0.328907     | 0.014164976 |
| 5          | rs7703380     | 0.0830325 | 0.118179     | 0.014172545 |
| 11         | rs1468291     | 0.433692  | 0.379475     | 0.014172545 |
| 12         | rs1400062     | 0.329749  | 0.278384     | 0.014172545 |
| 9          | rs12555267    | 0.0935252 | 0.13131      | 0.014180118 |
| 14         | rs17185050    | 0.12724   | 0.093654     | 0.014180118 |
| 4          | rs4639051     | 0.196043  | 0.154908     | 0.014187695 |
| 8          | rs7825551     | 0.253597  | 0.207525     | 0.014195277 |
| 4          | rs4399974     | 0.0701439 | 0.103996     | 0.014202862 |
| 2          | rs16825226    | 0.135379  | 0.178316     | 0.014210452 |
| 16         | rs8048917     | 0.25448   | 0.305774     | 0.014210452 |
| 6          | rs10807357    | 0.242806  | 0.197238     | 0.014218046 |
| 12         | rs2888896     | 0.329749  | 0.383709     | 0.014218046 |
| 3          | rs2677219     | 0.426259  | 0.372435     | 0.014225644 |
| 13         | rs4415922     | 0.234767  | 0.190354     | 0.014233246 |
| 7          | rs4074826     | 0.129032  | 0.170137     | 0.014240853 |
| 10         | rs10879       | 0.366906  | 0.314568     | 0.014240853 |
| 11         | rs1955024     | 0.335125  | 0.389267     | 0.014240853 |
| 3          | rs4685835     | 0.057554  | 0.0888662    | 0.014248464 |
| 4          | rs10023943    | 0.476619  | 0.420784     | 0.014248464 |
| 1          | rs3753737     | 0.263441  | 0.315663     | 0.014256079 |
| 2          | rs2714302     | 0.408602  | 0.355196     | 0.014256079 |
| 2          | rs10180047    | 0.232014  | 0.187798     | 0.014256079 |
| 4          | rs2168907     | 0.251799  | 0.205902     | 0.014256079 |
| 6          | rs4959501     | 0.271583  | 0.225145     | 0.014256079 |
| 1          | rs4927247     | 0.380866  | 0.436989     | 0.014271321 |
| 18         | rs2117200     | 0.151625  | 0.195741     | 0.014271321 |
| 21         | rs459090      | 0.181004  | 0.227598     | 0.014271321 |

Table DS2: All SNPs tested for association (RDC SABP vs. controls) with the Cochran-Armitage trend test and significant at the p=0.05 threshold.

| chromosome | SNP        | MAF_cases | MAF_controls | p_value     |
|------------|------------|-----------|--------------|-------------|
| 15         | rs2929639  | 0.494604  | 0.438055     | 0.014278948 |
| 19         | rs8111575  | 0.366906  | 0.421412     | 0.01428658  |
| 15         | rs289161   | 0.0752688 | 0.0505963    | 0.014301856 |
| 18         | rs12963714 | 0.38172   | 0.328907     | 0.014301856 |
| 3          | rs715882   | 0.106115  | 0.0759278    | 0.0143095   |
| 17         | rs3862148  | 0.203237  | 0.162005     | 0.0143095   |
| 6          | rs4946847  | 0.078853  | 0.113667     | 0.014317148 |
| 7          | rs7791650  | 0.139785  | 0.183014     | 0.014317148 |
| 1          | rs12080175 | 0.303249  | 0.254263     | 0.014324801 |
| 12         | rs6488258  | 0.154122  | 0.117206     | 0.014324801 |
| 5          | rs10065459 | 0.267025  | 0.318352     | 0.014332458 |
| 6          | rs182791   | 0.249104  | 0.203269     | 0.014332458 |
| 11         | rs16917433 | 0.141577  | 0.106339     | 0.014332458 |
| 11         | rs10501441 | 0.109319  | 0.148382     | 0.014332458 |
| 16         | rs7188458  | 0.413978  | 0.469847     | 0.014332458 |
| 5          | rs6882638  | 0.268116  | 0.320443     | 0.014340119 |
| 8          | rs6995242  | 0.382671  | 0.330208     | 0.014340119 |
| 16         | rs2967162  | 0.258065  | 0.212751     | 0.014340119 |
| 3          | rs1488135  | 0.120072  | 0.160708     | 0.014347784 |
| 4          | rs230500   | 0.40681   | 0.353733     | 0.014347784 |
| 17         | rs10432016 | 0.521661  | 0.466246     | 0.014347784 |
| 20         | rs13044720 | 0.206835  | 0.164736     | 0.014347784 |
| 13         | rs2083547  | 0.206093  | 0.254341     | 0.014355454 |
| 17         | rs6504617  | 0.145161  | 0.188798     | 0.014355454 |
| 2          | rs1405799  | 0.147482  | 0.191061     | 0.014363127 |
| 3          | rs10936611 | 0.378136  | 0.325894     | 0.014363127 |
| 10         | rs2918091  | 0.154122  | 0.117757     | 0.014363127 |
| 1          | rs1166928  | 0.277778  | 0.230324     | 0.014370805 |
| 20         | rs7269295  | 0.0591398 | 0.0908626    | 0.014370805 |
| 15         | rs2016840  | 0.223022  | 0.272495     | 0.014386174 |
| 18         | rs949025   | 0.176895  | 0.223513     | 0.014386174 |
| 2          | rs13005482 | 0.406475  | 0.462534     | 0.014393864 |
| 4          | rs17037141 | 0.0985663 | 0.0697754    | 0.014393864 |
| 9          | rs3001093  | 0.258065  | 0.309054     | 0.014393864 |
| 9          | rs12344392 | 0.112903  | 0.152456     | 0.014393864 |
| 18         | rs9955192  | 0.249104  | 0.204615     | 0.014393864 |
| 4          | rs594497   | 0.114695  | 0.0835322    | 0.014401559 |
| 11         | rs586026   | 0.386282  | 0.441377     | 0.014401559 |
| 1          | rs6541402  | 0.408273  | 0.354025     | 0.014409258 |
| 3          | rs2734350  | 0.28777   | 0.240116     | 0.014409258 |
| 17         | rs8073001  | 0.426523  | 0.371847     | 0.014409258 |
| 15         | rs12900605 | 0.410394  | 0.465723     | 0.014416962 |
| 1          | rs4636424  | 0.20471   | 0.163147     | 0.014424669 |
| 18         | rs9961629  | 0.182796  | 0.143684     | 0.014424669 |
| 3          | rs4626115  | 0.193548  | 0.152759     | 0.014432381 |
| 4          | rs908531   | 0.295699  | 0.349387     | 0.014432381 |
| 9          | rs16934170 | 0.192446  | 0.151862     | 0.014432381 |
| 7          | rs2215564  | 0.0896057 | 0.126746     | 0.014440097 |
| 10         | rs12773730 | 0.181004  | 0.227428     | 0.014447817 |
| 7          | rs1882094  | 0.350719  | 0.3          | 0.014455542 |
| 13         | rs7336943  | 0.206093  | 0.25426      | 0.014455542 |
| 14         | rs847318   | 0.331541  | 0.385598     | 0.014455542 |

Table DS2: All SNPs tested for association (RDC SABP vs. controls) with the Cochran-Armitage trend test and significant at the p=0.05 threshold.

| chromosome | SNP           | MAF_cases | MAF_controls | p_value     |
|------------|---------------|-----------|--------------|-------------|
| 20         | rs6134689     | 0.0591398 | 0.0908316    | 0.014455542 |
| 12         | rs17109924    | 0.099278  | 0.0700887    | 0.014463271 |
| 6          | rs9370893     | 0.318996  | 0.270003     | 0.014471004 |
| 7          | rs6969323     | 0.272401  | 0.22529      | 0.014471004 |
| 12         | rs16919295    | 0.293165  | 0.345879     | 0.014471004 |
| 2          | rs556650      | 0.253597  | 0.208149     | 0.014478741 |
| 2          | rs6704641     | 0.136201  | 0.178998     | 0.014478741 |
| 3          | rs163967      | 0.125448  | 0.166553     | 0.014486483 |
| 3          | rs16861123    | 0.358423  | 0.306841     | 0.014486483 |
| 17         | rs9303298     | 0.206835  | 0.164395     | 0.014486483 |
| 4          | rs10001127    | 0.114695  | 0.0835037    | 0.014494228 |
| 16         | rs9939575     | 0.0376344 | 0.0645436    | 0.014494228 |
| 17         | rs2955384     | 0.360215  | 0.308177     | 0.014494228 |
| 3          | rs1488795     | 0.326165  | 0.276567     | 0.014501978 |
| 13         | rs5005836     | 0.33213   | 0.281165     | 0.014501978 |
| 2          | rs4552196     | 0.170251  | 0.21594      | 0.014509733 |
| 4          | rs2728113     | 0.138489  | 0.103748     | 0.014509733 |
| 1          | rs2281870     | 0.0752688 | 0.0504431    | 0.014517491 |
| 2          | rs5011376     | 0.323741  | 0.377342     | 0.014517491 |
| 11         | rs11030552    | 0.219424  | 0.269533     | 0.014517491 |
| 2          | rs6741926     | 0.157706  | 0.121212     | 0.014525254 |
| 4          | rs221592      | 0.130824  | 0.097615     | 0.014525254 |
| 1          | rs17160305    | 0.184588  | 0.144486     | 0.014533021 |
| 18         | rs2850280     | 0.397849  | 0.345656     | 0.014533021 |
| 18         | rs17775161    | 0.505376  | 0.450256     | 0.014533021 |
| 16         | rs1389529     | 0.0322581 | 0.0582624    | 0.014540793 |
| 2          | rs7421696     | 0.17446   | 0.220804     | 0.014548569 |
| 11         | SNP_A-2044755 | 0.216846  | 0.265918     | 0.014548569 |
| 1          | SNP_A-2045577 | 0.377698  | 0.325094     | 0.014556349 |
| 1          | rs1337071     | 0.125899  | 0.092952     | 0.014564133 |
| 10         | rs721033      | 0.417563  | 0.364658     | 0.014564133 |
| 2          | rs10211389    | 0.229391  | 0.27861      | 0.014579714 |
| 6          | rs10945767    | 0.445848  | 0.501874     | 0.014579714 |
| 12         | rs12312130    | 0.146953  | 0.111869     | 0.014579714 |
| 13         | rs4374035     | 0.149281  | 0.112892     | 0.014579714 |
| 2          | rs13396831    | 0.252688  | 0.207296     | 0.014587511 |
| 2          | rs1861985     | 0.15233   | 0.196489     | 0.014587511 |
| 18         | rs12962942    | 0.38172   | 0.329131     | 0.014587511 |
| 3          | rs6803293     | 0.394265  | 0.449881     | 0.014595313 |
| 20         | rs1009737     | 0.195341  | 0.154778     | 0.014595313 |
| 8          | rs10504506    | 0.322464  | 0.272727     | 0.014603118 |
| 2          | rs4670214     | 0.156475  | 0.120096     | 0.014610928 |
| 5          | rs730781      | 0.405018  | 0.460607     | 0.014618743 |
| 11         | rs11028973    | 0.09319   | 0.129901     | 0.014626561 |
| 5          | rs160061      | 0.550179  | 0.494037     | 0.014634384 |
| 6          | rs681502      | 0.494624  | 0.439755     | 0.014634384 |
| 11         | rs12804856    | 0.111511  | 0.0805792    | 0.014634384 |
| 1          | rs7555443     | 0.401434  | 0.348604     | 0.014642212 |
| 2          | rs10195937    | 0.0377698 | 0.0648022    | 0.014642212 |
| 6          | rs10498942    | 0.202509  | 0.161158     | 0.014642212 |
| 14         | rs8019504     | 0.403636  | 0.458972     | 0.014642212 |
| 4          | rs1597977     | 0.272401  | 0.3238       | 0.014650043 |

Table DS2: All SNPs tested for association (RDC SABP vs. controls) with the Cochran-Armitage trend test and significant at the p=0.05 threshold.

| chromosome | SNP        | MAF_cases | MAF_controls | p_value     |
|------------|------------|-----------|--------------|-------------|
| 3          | rs1384762  | 0.183453  | 0.230454     | 0.014657879 |
| 7          | rs10486881 | 0.236559  | 0.192203     | 0.014657879 |
| 22         | rs460106   | 0.336331  | 0.285422     | 0.014657879 |
| 4          | rs4469035  | 0.12724   | 0.16888      | 0.014673564 |
| 10         | rs7915235  | 0.133094  | 0.0993863    | 0.014673564 |
| 17         | rs12451246 | 0.150538  | 0.114427     | 0.014673564 |
| 20         | rs11697918 | 0.501792  | 0.446038     | 0.014673564 |
| 4          | rs869537   | 0.295699  | 0.349233     | 0.014689266 |
| 16         | rs7189213  | 0.469534  | 0.415332     | 0.014689266 |
| 17         | rs2108978  | 0.437276  | 0.382543     | 0.014689266 |
| 18         | rs12458006 | 0.301075  | 0.353683     | 0.014704985 |
| 8          | rs16921974 | 0.132616  | 0.0992847    | 0.014712851 |
| 6          | rs9387156  | 0.249104  | 0.299557     | 0.014720721 |
| 19         | rs724637   | 0.120072  | 0.0881651    | 0.014720721 |
| 4          | rs2351299  | 0.132616  | 0.174224     | 0.014728596 |
| 1          | rs6704014  | 0.390681  | 0.337308     | 0.014736475 |
| 12         | rs10902450 | 0.435252  | 0.490119     | 0.014736475 |
| 22         | rs16979684 | 0.320789  | 0.270819     | 0.014736475 |
| 6          | rs3800184  | 0.136201  | 0.10201      | 0.014744359 |
| 18         | rs6507110  | 0.137184  | 0.179959     | 0.014744359 |
| 20         | rs6055877  | 0.239209  | 0.194993     | 0.014744359 |
| 10         | rs11001444 | 0.073741  | 0.108436     | 0.014752246 |
| 12         | rs7980996  | 0.27957   | 0.232289     | 0.014752246 |
| 14         | rs2681749  | 0.358423  | 0.41314      | 0.014752246 |
| 14         | rs8015982  | 0.203971  | 0.251703     | 0.014752246 |
| 4          | rs4859932  | 0.161871  | 0.124488     | 0.014760139 |
| 11         | rs11237911 | 0.154676  | 0.118399     | 0.014760139 |
| 2          | rs9808365  | 0.386691  | 0.333731     | 0.014768035 |
| 8          | rs4075826  | 0.247292  | 0.201635     | 0.014783841 |
| 9          | rs7863152  | 0.123656  | 0.164113     | 0.014783841 |
| 10         | rs2696309  | 0.238351  | 0.288416     | 0.014783841 |
| 16         | rs7197247  | 0.202509  | 0.161208     | 0.014783841 |
| 1          | rs17111725 | 0.289568  | 0.242594     | 0.014791751 |
| 2          | rs4538209  | 0.172662  | 0.218579     | 0.014799665 |
| 4          | rs11100897 | 0.410394  | 0.466451     | 0.014799665 |
| 6          | rs6457873  | 0.23741   | 0.28744      | 0.014799665 |
| 12         | rs7967313  | 0.265233  | 0.219271     | 0.014799665 |
| 17         | rs691127   | 0.218638  | 0.17628      | 0.014807583 |
| 11         | rs10838923 | 0.157706  | 0.201294     | 0.014815505 |
| 1          | rs17160264 | 0.163082  | 0.12517      | 0.014823432 |
| 12         | rs11182402 | 0.0681004 | 0.100545     | 0.014823432 |
| 1          | rs11203367 | 0.458781  | 0.404397     | 0.014831364 |
| 1          | rs563768   | 0.330935  | 0.385075     | 0.014831364 |
| 5          | rs7726671  | 0.334532  | 0.283719     | 0.014839299 |
| 6          | rs2057350  | 0.374552  | 0.323399     | 0.014839299 |
| 10         | rs6602099  | 0.181655  | 0.227878     | 0.014839299 |
| 10         | rs881631   | 0.123656  | 0.165188     | 0.014839299 |
| 18         | rs7239312  | 0.293907  | 0.247013     | 0.014855184 |
| 6          | rs1474986  | 0.107914  | 0.0773688    | 0.014863133 |
| 7          | rs10231898 | 0.422662  | 0.478868     | 0.014879044 |
| 5          | rs4867709  | 0.249104  | 0.204468     | 0.014887006 |
| 9          | rs4979248  | 0.148746  | 0.113211     | 0.014887006 |

Table DS2: All SNPs tested for association (RDC SABP vs. controls) with the Cochran-Armitage trend test and significant at the p=0.05 threshold.

| chromosome | SNP        | MAF_cases | MAF_controls | p_value     |
|------------|------------|-----------|--------------|-------------|
| 12         | rs10841413 | 0.413669  | 0.468825     | 0.014887006 |
| 14         | rs10150189 | 0.09319   | 0.130746     | 0.014887006 |
| 1          | rs2201848  | 0.327957  | 0.382022     | 0.014894972 |
| 1          | rs2644454  | 0.0519713 | 0.0825672    | 0.014894972 |
| 6          | rs12663742 | 0.417266  | 0.363884     | 0.014894972 |
| 8          | rs17732043 | 0.141577  | 0.106474     | 0.014894972 |
| 17         | rs7226127  | 0.0519713 | 0.0819142    | 0.014894972 |
| 2          | rs2385394  | 0.428058  | 0.373551     | 0.014902943 |
| 18         | rs680253   | 0.410394  | 0.46611      | 0.014902943 |
| 21         | rs2834976  | 0.119565  | 0.160116     | 0.014902943 |
| 4          | rs2075094  | 0.073741  | 0.0495572    | 0.014910918 |
| 13         | rs7322477  | 0.236559  | 0.192268     | 0.014910918 |
| 8          | rs4840510  | 0.0773381 | 0.112001     | 0.014918898 |
| 3          | rs1995395  | 0.402878  | 0.457936     | 0.014926882 |
| 6          | rs9472250  | 0.456679  | 0.402759     | 0.014926882 |
| 1          | rs10798036 | 0.447842  | 0.503064     | 0.01493487  |
| 2          | rs6436328  | 0.102518  | 0.14062      | 0.01493487  |
| 3          | rs1436826  | 0.317204  | 0.37049      | 0.01493487  |
| 5          | rs245466   | 0.0878136 | 0.0612837    | 0.01493487  |
| 11         | rs595102   | 0.270758  | 0.322938     | 0.01493487  |
| 18         | rs8093493  | 0.111111  | 0.0804637    | 0.01493487  |
| 12         | rs10850556 | 0.519713  | 0.464018     | 0.014942863 |
| 1          | rs2935     | 0.148551  | 0.11259      | 0.014966867 |
| 12         | rs11044375 | 0.209677  | 0.167578     | 0.014966867 |
| 17         | rs7225332  | 0.464158  | 0.410702     | 0.014966867 |
| 2          | rs17532798 | 0.120504  | 0.160873     | 0.014974878 |
| 10         | rs6583967  | 0.231183  | 0.28192      | 0.014990912 |
| 11         | rs12362371 | 0.216606  | 0.265609     | 0.014990912 |
| 18         | rs4940851  | 0.340502  | 0.393893     | 0.014990912 |
| 18         | rs7245110  | 0.170251  | 0.131937     | 0.014998935 |
| 18         | rs4797330  | 0.209677  | 0.258092     | 0.014998935 |
| 2          | rs7558379  | 0.304659  | 0.357898     | 0.015006963 |
| 12         | rs11049684 | 0.351254  | 0.300579     | 0.015006963 |
| 18         | rs1893799  | 0.284946  | 0.337474     | 0.015006963 |
| 2          | rs1427604  | 0.304659  | 0.3578       | 0.015014996 |
| 14         | rs12892499 | 0.166667  | 0.128659     | 0.015014996 |
| 16         | rs13335964 | 0.09319   | 0.0652915    | 0.015014996 |
| 3          | rs1456116  | 0.510753  | 0.455381     | 0.015031074 |
| 22         | rs136382   | 0.213262  | 0.171268     | 0.01503912  |
| 4          | rs7680340  | 0.256272  | 0.210679     | 0.01504717  |
| 6          | rs4538755  | 0.451264  | 0.396287     | 0.01504717  |
| 6          | rs973094   | 0.256272  | 0.307325     | 0.01504717  |
| 6          | rs971215   | 0.385305  | 0.441357     | 0.01504717  |
| 12         | rs10507120 | 0.342294  | 0.396628     | 0.01504717  |
| 17         | rs203466   | 0.437276  | 0.382754     | 0.01504717  |
| 12         | rs2110073  | 0.0591398 | 0.090273     | 0.015055225 |
| 1          | rs899380   | 0.0949821 | 0.0666099    | 0.015063284 |
| 10         | rs10762521 | 0.433453  | 0.379387     | 0.015071347 |
| 12         | rs1382635  | 0.4319    | 0.486887     | 0.015071347 |
| 2          | rs17733015 | 0.315884  | 0.266724     | 0.015079415 |
| 9          | rs7037490  | 0.202509  | 0.160933     | 0.015079415 |
| 18         | rs8085955  | 0.329749  | 0.383606     | 0.015079415 |



Table DS2: All SNPs tested for association (RDC SABP vs. controls) with the Cochran-Armitage trend test and significant at the p=0.05 threshold.

| chromosome | SNP        | MAF_cases | MAF_controls | p_value     |
|------------|------------|-----------|--------------|-------------|
| 4          | rs4864540  | 0.228417  | 0.278024     | 0.015087488 |
| 11         | rs10831988 | 0.550179  | 0.494549     | 0.015087488 |
| 14         | rs11159509 | 0.228417  | 0.1855       | 0.015087488 |
| 3          | rs2886242  | 0.0917266 | 0.12807      | 0.015103646 |
| 13         | rs7992504  | 0.370968  | 0.318863     | 0.015103646 |
| 15         | rs2292547  | 0.246403  | 0.296555     | 0.015111732 |
| 7          | rs2051750  | 0.175627  | 0.220708     | 0.015119822 |
| 8          | rs455071   | 0.173835  | 0.135466     | 0.015127917 |
| 2          | rs6430411  | 0.295699  | 0.348722     | 0.01514412  |
| 3          | rs6780434  | 0.0394265 | 0.0668258    | 0.01514412  |
| 6          | rs9372118  | 0.431655  | 0.377729     | 0.015152228 |
| 7          | rs523343   | 0.523297  | 0.467121     | 0.015152228 |
| 7          | rs622671   | 0.523297  | 0.467132     | 0.015152228 |
| 10         | rs1992625  | 0.164875  | 0.20971      | 0.015152228 |
| 20         | rs1475232  | 0.0863309 | 0.122487     | 0.015152228 |
| 3          | rs7623989  | 0.195341  | 0.242765     | 0.01516034  |
| 9          | rs7021289  | 0.308244  | 0.259877     | 0.01516034  |
| 5          | rs159969   | 0.224014  | 0.180456     | 0.015176579 |
| 5          | rs7702763  | 0.192446  | 0.238938     | 0.015176579 |
| 6          | rs531173   | 0.22043   | 0.269401     | 0.015176579 |
| 4          | rs9995611  | 0.0842294 | 0.120102     | 0.015184705 |
| 4          | rs12651625 | 0.113309  | 0.0824813    | 0.015184705 |
| 6          | rs9388752  | 0.318996  | 0.269676     | 0.015184705 |
| 3          | rs1349607  | 0.271583  | 0.224778     | 0.015192835 |
| 8          | rs1788173  | 0.446237  | 0.392881     | 0.015192835 |
| 5          | rs245467   | 0.0878136 | 0.061287     | 0.01520097  |
| 9          | rs2377423  | 0.261649  | 0.215917     | 0.01520911  |
| 1          | rs10915692 | 0.198925  | 0.157975     | 0.015217254 |
| 2          | rs1474052  | 0.386691  | 0.334072     | 0.015225402 |
| 3          | rs1802481  | 0.394265  | 0.449063     | 0.015225402 |
| 4          | rs7667341  | 0.0985663 | 0.0700409    | 0.015225402 |
| 6          | rs977674   | 0.299283  | 0.35218      | 0.015225402 |
| 8          | rs7004990  | 0.412186  | 0.467791     | 0.015225402 |
| 13         | rs1753738  | 0.243728  | 0.199762     | 0.015241713 |
| 2          | rs10803535 | 0.193548  | 0.240716     | 0.015266212 |
| 5          | rs2973869  | 0.458633  | 0.404339     | 0.015266212 |
| 6          | rs1794856  | 0.44964   | 0.394549     | 0.015266212 |
| 1          | rs2012235  | 0.324373  | 0.274727     | 0.015274387 |
| 4          | rs13118541 | 0.487455  | 0.432879     | 0.015274387 |
| 12         | rs6488494  | 0.410072  | 0.464882     | 0.015274387 |
| 5          | rs11956132 | 0.267025  | 0.31846      | 0.015290752 |
| 7          | rs799580   | 0.462366  | 0.408101     | 0.015290752 |
| 1          | rs953654   | 0.526882  | 0.472402     | 0.015298941 |
| 1          | rs2120434  | 0.353791  | 0.40824      | 0.015298941 |
| 2          | rs10190015 | 0.218638  | 0.175777     | 0.015298941 |
| 7          | rs4726747  | 0.073741  | 0.0493701    | 0.015298941 |
| 21         | rs2837132  | 0.170251  | 0.215235     | 0.015298941 |
| 1          | rs6676840  | 0.390681  | 0.337538     | 0.015307134 |
| 2          | rs6757233  | 0.332734  | 0.283401     | 0.015307134 |
| 5          | rs17209947 | 0.155914  | 0.119332     | 0.015307134 |
| 9          | rs17259739 | 0.351254  | 0.405963     | 0.015307134 |
| 18         | rs2712735  | 0.28853   | 0.240545     | 0.015307134 |

Table DS2: All SNPs tested for association (RDC SABP vs. controls) with the Cochran-Armitage trend test and significant at the p=0.05 threshold.

| chromosome | SNP        | MAF_cases | MAF_controls | p_value     |
|------------|------------|-----------|--------------|-------------|
| 5          | rs16896096 | 0.234657  | 0.284691     | 0.015323535 |
| 6          | rs2608912  | 0.258065  | 0.212534     | 0.015323535 |
| 1          | rs6663223  | 0.314748  | 0.265066     | 0.015331742 |
| 3          | rs7427456  | 0.329749  | 0.279066     | 0.015331742 |
| 2          | rs4849404  | 0.159498  | 0.204329     | 0.015339953 |
| 7          | rs1435534  | 0.281362  | 0.234503     | 0.015339953 |
| 1          | rs17038321 | 0.115108  | 0.0837875    | 0.01534817  |
| 7          | rs6963945  | 0.492806  | 0.4375       | 0.01534817  |
| 17         | rs171440   | 0.408602  | 0.46493      | 0.01534817  |
| 1          | rs6702367  | 0.107914  | 0.147039     | 0.01535639  |
| 6          | rs9294116  | 0.482079  | 0.427062     | 0.01535639  |
| 11         | rs10838954 | 0.335125  | 0.388699     | 0.01535639  |
| 2          | rs11685807 | 0.283154  | 0.235765     | 0.015364615 |
| 9          | rs1041174  | 0.044964  | 0.0732332    | 0.015364615 |
| 14         | rs10145503 | 0.16426   | 0.209286     | 0.015364615 |
| 4          | rs10011322 | 0.130824  | 0.172061     | 0.015372845 |
| 10         | rs2688749  | 0.413669  | 0.469645     | 0.015381079 |
| 16         | rs2086824  | 0.516129  | 0.460423     | 0.015381079 |
| 1          | rs585315   | 0.253597  | 0.304799     | 0.015389318 |
| 12         | rs4313630  | 0.0359712 | 0.0623935    | 0.015389318 |
| 2          | rs3769745  | 0.249097  | 0.204499     | 0.015397562 |
| 2          | rs314709   | 0.125448  | 0.165415     | 0.015397562 |
| 10         | rs10999905 | 0.12724   | 0.0941237    | 0.015397562 |
| 21         | rs11088595 | 0.267025  | 0.318275     | 0.015397562 |
| 6          | rs2282237  | 0.236559  | 0.286201     | 0.015405809 |
| 19         | rs7254891  | 0.516129  | 0.460688     | 0.015405809 |
| 1          | rs10918732 | 0.125448  | 0.092845     | 0.015414062 |
| 9          | rs3808747  | 0.104317  | 0.142906     | 0.015414062 |
| 21         | rs2830117  | 0.0949821 | 0.131597     | 0.015414062 |
| 1          | rs17131041 | 0.0412186 | 0.0683834    | 0.015430581 |
| 8          | rs901172   | 0.31362   | 0.367201     | 0.015438847 |
| 10         | rs10824538 | 0.0842294 | 0.0582906    | 0.015438847 |
| 13         | rs7993642  | 0.206093  | 0.253749     | 0.015438847 |
| 2          | rs1858308  | 0.34767   | 0.296966     | 0.015463672 |
| 6          | rs2150232  | 0.08      | 0.115188     | 0.015463672 |
| 6          | rs2621384  | 0.44086   | 0.386751     | 0.015463672 |
| 7          | rs12534697 | 0.09319   | 0.129522     | 0.015463672 |
| 22         | rs450975   | 0.350719  | 0.299386     | 0.015463672 |
| 1          | rs10801772 | 0.392473  | 0.340273     | 0.015471957 |
| 5          | rs6450868  | 0.395683  | 0.451124     | 0.015471957 |
| 15         | rs11635754 | 0.252708  | 0.30359      | 0.015471957 |
| 22         | rs2587108  | 0.438849  | 0.384458     | 0.015471957 |
| 5          | rs9293194  | 0.47491   | 0.421322     | 0.015480246 |
| 17         | rs119672   | 0.437276  | 0.382924     | 0.015480246 |
| 19         | rs3752135  | 0.123656  | 0.163881     | 0.015480246 |
| 7          | rs6979375  | 0.304659  | 0.255973     | 0.015488539 |
| 11         | rs10501559 | 0.318996  | 0.269165     | 0.015488539 |
| 20         | rs2206920  | 0.129032  | 0.0960818    | 0.015488539 |
| 1          | rs2647389  | 0.102151  | 0.139551     | 0.015496837 |
| 4          | rs1866497  | 0.100719  | 0.138671     | 0.015496837 |
| 22         | rs3788483  | 0.456835  | 0.402451     | 0.015496837 |
| 4          | rs1879827  | 0.17446   | 0.220327     | 0.015513447 |

Table DS2: All SNPs tested for association (RDC SABP vs. controls) with the Cochran-Armitage trend test and significant at the p=0.05 threshold.

| chromosome | SNP           | MAF_cases | MAF_controls | p_value     |
|------------|---------------|-----------|--------------|-------------|
| 15         | rs11071467    | 0.227599  | 0.184435     | 0.015513447 |
| 6          | rs2478228     | 0.0734767 | 0.106912     | 0.015521759 |
| 11         | rs11040428    | 0.374552  | 0.428523     | 0.015521759 |
| 12         | rs3818343     | 0.113309  | 0.0828503    | 0.015521759 |
| 20         | rs6097782     | 0.103943  | 0.142541     | 0.015521759 |
| 4          | rs17225222    | 0.057554  | 0.0884157    | 0.015530076 |
| 9          | rs4880142     | 0.268817  | 0.222336     | 0.015530076 |
| 19         | rs4802905     | 0.139785  | 0.10555      | 0.015530076 |
| 5          | rs217771      | 0.224014  | 0.180565     | 0.015538397 |
| 6          | rs7776283     | 0.492832  | 0.437947     | 0.015538397 |
| 16         | rs7202791     | 0.408602  | 0.463896     | 0.015546722 |
| 8          | rs16897552    | 0.370909  | 0.319312     | 0.015555053 |
| 10         | rs2274629     | 0.315412  | 0.26611      | 0.015555053 |
| 19         | rs274861      | 0.507168  | 0.451894     | 0.015555053 |
| 4          | rs2132880     | 0.519784  | 0.464371     | 0.015571727 |
| 2          | rs17044597    | 0.17446   | 0.220252     | 0.015580071 |
| 3          | rs2622726     | 0.173835  | 0.135434     | 0.015580071 |
| 5          | rs11242527    | 0.207885  | 0.167178     | 0.015580071 |
| 2          | rs1374230     | 0.326165  | 0.276033     | 0.01558842  |
| 3          | rs2034870     | 0.222222  | 0.179789     | 0.01558842  |
| 4          | rs181999      | 0.446237  | 0.392164     | 0.015605131 |
| 5          | rs966702      | 0.243728  | 0.293456     | 0.015605131 |
| 2          | rs1347630     | 0.102518  | 0.1403       | 0.015613493 |
| 6          | rs977673      | 0.299283  | 0.351959     | 0.015613493 |
| 6          | rs6927351     | 0.160072  | 0.123169     | 0.015613493 |
| 10         | rs10762885    | 0.336918  | 0.39046      | 0.015613493 |
| 5          | rs264843      | 0.170251  | 0.132243     | 0.01562186  |
| 1          | rs7535776     | 0.25448   | 0.209397     | 0.015630232 |
| 7          | rs6978677     | 0.224014  | 0.273656     | 0.015630232 |
| 11         | rs12785840    | 0.173835  | 0.13531      | 0.015630232 |
| 14         | rs12589351    | 0.426259  | 0.373        | 0.015630232 |
| 2          | rs7603762     | 0.351254  | 0.404746     | 0.015638608 |
| 5          | rs12520410    | 0.09319   | 0.0654397    | 0.015638608 |
| 5          | rs16869777    | 0.15233   | 0.116786     | 0.015638608 |
| 10         | rs726176      | 0.315412  | 0.26611      | 0.015638608 |
| 13         | rs1337144     | 0.323741  | 0.27454      | 0.015638608 |
| 10         | rs17752045    | 0.0989209 | 0.137045     | 0.015646989 |
| 21         | rs2835561     | 0.264388  | 0.315117     | 0.015646989 |
| 1          | rs2927934     | 0.193548  | 0.153715     | 0.015655375 |
| 11         | rs7943714     | 0.374552  | 0.322487     | 0.015663765 |
| 13         | rs637412      | 0.18638   | 0.233049     | 0.01567216  |
| 3          | rs7612873     | 0.114695  | 0.154096     | 0.01568056  |
| 8          | rs7820147     | 0.496403  | 0.441066     | 0.01568056  |
| 12         | rs10843580    | 0.320789  | 0.374617     | 0.01568056  |
| 21         | rs2834424     | 0.0953237 | 0.132323     | 0.01568056  |
| 6          | rs10946146    | 0.0953237 | 0.0671896    | 0.015688964 |
| 16         | rs8045889     | 0.336918  | 0.287347     | 0.015688964 |
| 12         | rs1965728     | 0.304659  | 0.256214     | 0.015697372 |
| 16         | rs8054668     | 0.320144  | 0.270478     | 0.015697372 |
| 3          | rs2410776     | 0.241935  | 0.196799     | 0.015705786 |
| 3          | rs17049505    | 0.116906  | 0.0859721    | 0.015714204 |
| 7          | SNP_A-4221783 | 0.140288  | 0.106107     | 0.015714204 |

Table DS2: All SNPs tested for association (RDC SABP vs. controls) with the Cochran-Armitage trend test and significant at the p=0.05 threshold.

| chromosome | SNP           | MAF_cases | MAF_controls | p_value     |
|------------|---------------|-----------|--------------|-------------|
| 4          | rs12511409    | 0.114695  | 0.0837875    | 0.015722627 |
| 4          | rs650435      | 0.114695  | 0.0837875    | 0.015722627 |
| 8          | rs2325777     | 0.197133  | 0.157177     | 0.015722627 |
| 18         | rs8092549     | 0.163082  | 0.126192     | 0.015731054 |
| 2          | rs13002785    | 0.155914  | 0.120061     | 0.015739486 |
| 13         | rs9576072     | 0.374552  | 0.42952      | 0.015747923 |
| 20         | rs467129      | 0.326165  | 0.380676     | 0.015747923 |
| 2          | rs1448831     | 0.283154  | 0.235955     | 0.015756364 |
| 4          | rs16839667    | 0.121864  | 0.162355     | 0.015756364 |
| 20         | rs4814335     | 0.224014  | 0.180982     | 0.015756364 |
| 2          | rs17750431    | 0.362007  | 0.311562     | 0.015773261 |
| 4          | rs13109348    | 0.256272  | 0.210876     | 0.015773261 |
| 10         | rs871262      | 0.473118  | 0.419564     | 0.015773261 |
| 1          | rs11121605    | 0.114695  | 0.155196     | 0.015781716 |
| 3          | rs1371568     | 0.0341727 | 0.0597345    | 0.015790176 |
| 11         | rs10831631    | 0.378136  | 0.432469     | 0.015790176 |
| 11         | rs4755450     | 0.302867  | 0.355975     | 0.015790176 |
| 16         | rs6539984     | 0.188172  | 0.234151     | 0.015790176 |
| 3          | rs12497688    | 0.208633  | 0.167462     | 0.015798641 |
| 10         | rs7898120     | 0.0935252 | 0.065906     | 0.015798641 |
| 13         | rs4943157     | 0.408602  | 0.464042     | 0.015798641 |
| 11         | rs11039885    | 0.431655  | 0.486514     | 0.01580711  |
| 1          | rs4920579     | 0.11828   | 0.0867712    | 0.015815584 |
| 8          | rs7825887     | 0.322581  | 0.375725     | 0.015815584 |
| 15         | rs4553601     | 0.157706  | 0.201841     | 0.015815584 |
| 1          | rs10888935    | 0.318996  | 0.371935     | 0.015824063 |
| 15         | rs7181180     | 0.0629496 | 0.0945486    | 0.015824063 |
| 18         | rs654975      | 0.286738  | 0.338336     | 0.015824063 |
| 1          | rs4559477     | 0.132616  | 0.0994541    | 0.015832546 |
| 18         | rs8088243     | 0.181004  | 0.142371     | 0.015832546 |
| 22         | rs6004454     | 0.320144  | 0.270684     | 0.015832546 |
| 3          | rs13081010    | 0.259857  | 0.310838     | 0.015841034 |
| 12         | rs2446343     | 0.172043  | 0.133764     | 0.015841034 |
| 12         | rs10859907    | 0.286738  | 0.239441     | 0.015841034 |
| 19         | rs10402957    | 0.243728  | 0.293526     | 0.015841034 |
| 22         | rs135810      | 0.150538  | 0.115254     | 0.015841034 |
| 4          | SNP_A-2127460 | 0.25448   | 0.209441     | 0.015849527 |
| 4          | rs2203017     | 0.155914  | 0.119754     | 0.015866527 |
| 9          | rs912202      | 0.304659  | 0.356826     | 0.015866527 |
| 17         | rs854767      | 0.363799  | 0.312223     | 0.015866527 |
| 1          | rs6664088     | 0.329749  | 0.279802     | 0.015875034 |
| 7          | rs1880297     | 0.498201  | 0.443631     | 0.015875034 |
| 13         | rs1407992     | 0.408602  | 0.464018     | 0.015875034 |
| 1          | rs3790766     | 0.383513  | 0.33095      | 0.015883545 |
| 11         | rs2283233     | 0.428315  | 0.375        | 0.015883545 |
| 14         | rs1058010     | 0.0448029 | 0.0731333    | 0.015883545 |
| 5          | rs17780860    | 0.12724   | 0.167689     | 0.015892062 |
| 20         | rs17729021    | 0.273381  | 0.227226     | 0.015892062 |
| 1          | rs3845431     | 0.510791  | 0.456048     | 0.015909108 |
| 8          | rs1427067     | 0.347122  | 0.296322     | 0.015909108 |
| 16         | rs11640128    | 0.30036   | 0.251362     | 0.015909108 |
| 20         | rs218466      | 0.356631  | 0.305451     | 0.015909108 |

Table DS2: All SNPs tested for association (RDC SABP vs. controls) with the Cochran-Armitage trend test and significant at the p=0.05 threshold.

| chromosome | SNP        | MAF_cases | MAF_controls | p_value     |
|------------|------------|-----------|--------------|-------------|
| 6          | rs1395122  | 0.103943  | 0.14186      | 0.015917639 |
| 6          | rs602890   | 0.494624  | 0.440415     | 0.015917639 |
| 9          | rs2694058  | 0.410394  | 0.465441     | 0.015917639 |
| 12         | rs12822943 | 0.259857  | 0.214918     | 0.015917639 |
| 14         | rs1189042  | 0.458781  | 0.404324     | 0.015917639 |
| 16         | rs4985010  | 0.299283  | 0.351839     | 0.015917639 |
| 11         | rs4414211  | 0.154122  | 0.197785     | 0.015934713 |
| 6          | rs9486471  | 0.09319   | 0.0655067    | 0.015943258 |
| 22         | rs7284633  | 0.150538  | 0.11528      | 0.015943258 |
| 1          | rs235503   | 0.231183  | 0.188075     | 0.015951807 |
| 3          | rs1500704  | 0.073741  | 0.108044     | 0.015951807 |
| 5          | rs33895    | 0.403226  | 0.350528     | 0.01596892  |
| 8          | rs16897057 | 0.530576  | 0.475094     | 0.015994625 |
| 2          | rs13368872 | 0.302158  | 0.354409     | 0.016003202 |
| 6          | rs6912006  | 0.276978  | 0.328674     | 0.016003202 |
| 10         | rs6599621  | 0.0752688 | 0.0507493    | 0.016003202 |
| 2          | rs7599681  | 0.200717  | 0.16002      | 0.016011785 |
| 2          | rs10930397 | 0.259857  | 0.214675     | 0.016011785 |
| 13         | rs981674   | 0.240143  | 0.289707     | 0.016011785 |
| 9          | rs1929536  | 0.424731  | 0.371204     | 0.016020372 |
| 10         | rs12258036 | 0.508993  | 0.453306     | 0.016028964 |
| 16         | rs747641   | 0.311828  | 0.364008     | 0.016028964 |
| 7          | rs1543239  | 0.129032  | 0.170536     | 0.01603756  |
| 13         | rs2775058  | 0.268953  | 0.222127     | 0.01603756  |
| 15         | rs549914   | 0.424731  | 0.480369     | 0.016046162 |
| 13         | rs4883921  | 0.224014  | 0.272743     | 0.016063379 |
| 17         | rs806933   | 0.397849  | 0.344634     | 0.016063379 |
| 22         | rs463426   | 0.342294  | 0.290872     | 0.016063379 |
| 15         | rs7165146  | 0.422939  | 0.478883     | 0.016071994 |
| 6          | rs2855459  | 0.102151  | 0.140082     | 0.016080615 |
| 1          | rs6694039  | 0.394265  | 0.342356     | 0.01608924  |
| 6          | rs4945784  | 0.0791367 | 0.113381     | 0.01608924  |
| 10         | rs7076997  | 0.37276   | 0.321295     | 0.01608924  |
| 15         | rs11630493 | 0.301075  | 0.353883     | 0.01608924  |
| 7          | rs2191533  | 0.233813  | 0.190525     | 0.01609787  |
| 7          | rs2471290  | 0.0923913 | 0.0650393    | 0.01609787  |
| 12         | rs4081670  | 0.329749  | 0.382674     | 0.016106505 |
| 7          | rs7803844  | 0.16129   | 0.124659     | 0.016115144 |
| 11         | rs11032614 | 0.163082  | 0.126068     | 0.016115144 |
| 1          | rs191942   | 0.386691  | 0.334015     | 0.016123789 |
| 8          | rs4401868  | 0.433213  | 0.379257     | 0.01614975  |
| 13         | rs7320751  | 0.275986  | 0.22943      | 0.016158414 |
| 3          | rs1392566  | 0.324373  | 0.377513     | 0.016167082 |
| 4          | rs9991256  | 0.15233   | 0.116655     | 0.016167082 |
| 5          | rs2015904  | 0.342294  | 0.292504     | 0.016167082 |
| 6          | rs9381097  | 0.311828  | 0.263373     | 0.016175755 |
| 7          | rs12702496 | 0.311828  | 0.262683     | 0.016175755 |
| 13         | rs9513000  | 0.154676  | 0.198637     | 0.016175755 |
| 18         | rs1550598  | 0.530466  | 0.475631     | 0.016184433 |
| 1          | rs1677761  | 0.0949821 | 0.0668822    | 0.016193115 |
| 2          | rs1002537  | 0.335125  | 0.387526     | 0.016193115 |
| 18         | rs4797739  | 0.260791  | 0.215138     | 0.016201803 |

Table DS2: All SNPs tested for association (RDC SABP vs. controls) with the Cochran-Armitage trend test and significant at the p=0.05 threshold.

| chromosome | SNP           | MAF_cases | MAF_controls | p_value     |
|------------|---------------|-----------|--------------|-------------|
| 20         | rs6027861     | 0.111111  | 0.149284     | 0.016201803 |
| 6          | rs2816242     | 0.482079  | 0.428596     | 0.016210495 |
| 11         | rs11039820    | 0.335125  | 0.388302     | 0.016210495 |
| 7          | rs7777812     | 0.207885  | 0.166667     | 0.016219192 |
| 16         | rs4784852     | 0.111511  | 0.149778     | 0.016219192 |
| 20         | rs1005920     | 0.386691  | 0.440204     | 0.016219192 |
| 1          | rs6541245     | 0.293165  | 0.345538     | 0.016227894 |
| 6          | rs3777707     | 0.399642  | 0.454096     | 0.016227894 |
| 6          | rs3903759     | 0.184588  | 0.145542     | 0.016227894 |
| 7          | rs12531851    | 0.11828   | 0.157123     | 0.0162366   |
| 11         | rs7949349     | 0.16426   | 0.208774     | 0.0162366   |
| 13         | rs4941832     | 0.0791367 | 0.0540034    | 0.0162366   |
| 5          | rs1432677     | 0.224014  | 0.181384     | 0.016245312 |
| 6          | rs2487373     | 0.345878  | 0.399148     | 0.016245312 |
| 8          | rs2568447     | 0.102888  | 0.0736196    | 0.016245312 |
| 16         | rs164749      | 0.485663  | 0.431369     | 0.016245312 |
| 18         | rs1550597     | 0.530466  | 0.475655     | 0.016245312 |
| 7          | rs541186      | 0.530466  | 0.474796     | 0.016254028 |
| 18         | rs11661039    | 0.146953  | 0.189932     | 0.016254028 |
| 5          | rs2269282     | 0.24552   | 0.294649     | 0.016262749 |
| 12         | rs11066410    | 0.0719424 | 0.0483265    | 0.016262749 |
| 18         | rs9964111     | 0.0920578 | 0.0649506    | 0.016262749 |
| 2          | rs6543594     | 0.482079  | 0.42823      | 0.016271475 |
| 4          | SNP_A-2220351 | 0.0773381 | 0.0523712    | 0.016280206 |
| 6          | rs16883398    | 0.123656  | 0.164337     | 0.016288941 |
| 11         | rs7106314     | 0.261649  | 0.215967     | 0.016288941 |
| 6          | rs2479017     | 0.368705  | 0.421896     | 0.016297682 |
| 8          | rs13271014    | 0.0645161 | 0.0959768    | 0.016297682 |
| 11         | rs610160      | 0.154122  | 0.118048     | 0.016297682 |
| 21         | rs535457      | 0.318996  | 0.270095     | 0.016297682 |
| 11         | rs353608      | 0.535842  | 0.481431     | 0.016306427 |
| 20         | rs6095069     | 0.197133  | 0.244293     | 0.016306427 |
| 7          | rs10950115    | 0.336918  | 0.390198     | 0.016315177 |
| 8          | rs1379134     | 0.125448  | 0.165475     | 0.016323932 |
| 20         | rs1886308     | 0.103943  | 0.142127     | 0.016323932 |
| 2          | rs12616954    | 0.272401  | 0.322427     | 0.016332692 |
| 2          | rs2602380     | 0.320789  | 0.374021     | 0.016341456 |
| 4          | rs6831310     | 0.154122  | 0.118358     | 0.016341456 |
| 6          | rs226914      | 0.148746  | 0.191573     | 0.016341456 |
| 8          | rs7823138     | 0.18638   | 0.231936     | 0.016341456 |
| 11         | rs12420372    | 0.335125  | 0.388169     | 0.016341456 |
| 19         | rs1062098     | 0.408273  | 0.356267     | 0.016341456 |
| 15         | rs1432129     | 0.496416  | 0.441749     | 0.016350226 |
| 20         | rs6081714     | 0.322581  | 0.374872     | 0.016350226 |
| 1          | rs235885      | 0.229391  | 0.186542     | 0.016359    |
| 9          | rs10125660    | 0.232975  | 0.281846     | 0.016359    |
| 9          | rs10812604    | 0.248201  | 0.29744      | 0.016359    |
| 2          | rs4672274     | 0.451264  | 0.396622     | 0.016367779 |
| 1          | rs2146340     | 0.392473  | 0.34077      | 0.016376563 |
| 8          | rs351562      | 0.283154  | 0.236087     | 0.016376563 |
| 10         | rs10786112    | 0.392086  | 0.339884     | 0.016376563 |
| 12         | rs838177      | 0.125448  | 0.165702     | 0.016376563 |

Table DS2: All SNPs tested for association (RDC SABP vs. controls) with the Cochran-Armitage trend test and significant at the p=0.05 threshold.

| chromosome | SNP           | MAF_cases | MAF_controls | p_value     |
|------------|---------------|-----------|--------------|-------------|
| 13         | rs7981779     | 0.401434  | 0.348841     | 0.016376563 |
| 5          | rs1863975     | 0.112903  | 0.0825391    | 0.016385352 |
| 7          | SNP_A-2068030 | 0.304659  | 0.256231     | 0.016385352 |
| 9          | rs10760481    | 0.182796  | 0.22845      | 0.016385352 |
| 7          | rs17172953    | 0.0734767 | 0.0491999    | 0.016394146 |
| 3          | rs9872427     | 0.214801  | 0.173609     | 0.016402945 |
| 2          | rs3113224     | 0.145161  | 0.187223     | 0.016411748 |
| 2          | rs12473563    | 0.4319    | 0.37807      | 0.016411748 |
| 12         | rs2341292     | 0.184588  | 0.145486     | 0.016420556 |
| 15         | rs4984473     | 0.442652  | 0.497617     | 0.016420556 |
| 18         | rs9955120     | 0.125     | 0.16553      | 0.016420556 |
| 22         | rs7287460     | 0.0752688 | 0.109029     | 0.016420556 |
| 12         | rs2288132     | 0.257194  | 0.212193     | 0.01642937  |
| 21         | rs2835035     | 0.478417  | 0.423995     | 0.01642937  |
| 7          | rs2529038     | 0.32554   | 0.27632      | 0.016447011 |
| 8          | rs6989913     | 0.0305755 | 0.0550443    | 0.016447011 |
| 9          | rs7859254     | 0.333333  | 0.284254     | 0.016447011 |
| 16         | rs1552425     | 0.372302  | 0.427208     | 0.016447011 |
| 17         | rs2350977     | 0.424731  | 0.371292     | 0.016447011 |
| 1          | rs4263970     | 0.439068  | 0.49421      | 0.016455839 |
| 2          | rs4662908     | 0.307554  | 0.360279     | 0.016455839 |
| 2          | rs12622547    | 0.34767   | 0.296934     | 0.016455839 |
| 2          | rs3821002     | 0.351254  | 0.404226     | 0.016455839 |
| 3          | rs6801853     | 0.405018  | 0.353051     | 0.016455839 |
| 3          | rs17272509    | 0.0773381 | 0.111376     | 0.016464671 |
| 3          | rs1606393     | 0.44086   | 0.495737     | 0.016464671 |
| 7          | rs6975407     | 0.349462  | 0.402011     | 0.016464671 |
| 16         | rs7196508     | 0.365591  | 0.420342     | 0.016464671 |
| 10         | rs2394264     | 0.473118  | 0.418942     | 0.016473509 |
| 3          | rs2682386     | 0.418478  | 0.36528      | 0.016482351 |
| 4          | rs4834722     | 0.0949821 | 0.131086     | 0.016482351 |
| 6          | rs17461290    | 0.227599  | 0.184605     | 0.016482351 |
| 14         | rs11628576    | 0.240072  | 0.289294     | 0.016482351 |
| 15         | rs17806738    | 0.172662  | 0.135232     | 0.016482351 |
| 18         | rs4553711     | 0.223022  | 0.272417     | 0.016482351 |
| 2          | rs17044974    | 0.0665468 | 0.0991144    | 0.016491199 |
| 5          | rs13170578    | 0.270609  | 0.224472     | 0.016491199 |
| 5          | rs1991483     | 0.394265  | 0.342249     | 0.016491199 |
| 6          | rs6935912     | 0.356115  | 0.305394     | 0.016491199 |
| 9          | rs4403479     | 0.232975  | 0.282134     | 0.016491199 |
| 17         | rs758304      | 0.0322581 | 0.0570504    | 0.016491199 |
| 15         | rs10518766    | 0.107914  | 0.0778955    | 0.016500051 |
| 8          | rs7462005     | 0.0322581 | 0.0569577    | 0.016508908 |
| 21         | rs2836452     | 0.215054  | 0.173595     | 0.016508908 |
| 12         | rs7980801     | 0.154122  | 0.117928     | 0.016517771 |
| 12         | rs7956731     | 0.0884477 | 0.0613046    | 0.016517771 |
| 14         | rs2415872     | 0.548387  | 0.494042     | 0.016517771 |
| 18         | rs206420      | 0.435484  | 0.490798     | 0.016517771 |
| 18         | rs4613156     | 0.100719  | 0.137308     | 0.016517771 |
| 2          | rs10929918    | 0.353047  | 0.302112     | 0.016526638 |
| 19         | rs880896      | 0.27957   | 0.233038     | 0.016526638 |
| 22         | rs11912715    | 0.150538  | 0.115463     | 0.016526638 |

Table DS2: All SNPs tested for association (RDC SABP vs. controls) with the Cochran-Armitage trend test and significant at the p=0.05 threshold.

| chromosome | SNP           | MAF_cases | MAF_controls | p_value     |
|------------|---------------|-----------|--------------|-------------|
| 2          | rs6714879     | 0.0719424 | 0.104465     | 0.01653551  |
| 3          | rs2856238     | 0.394265  | 0.448417     | 0.01653551  |
| 2          | rs4673212     | 0.232975  | 0.282431     | 0.016544386 |
| 9          | rs10124892    | 0.458781  | 0.404665     | 0.016544386 |
| 13         | rs17084776    | 0.0557554 | 0.0859535    | 0.016544386 |
| 18         | rs1159861     | 0.403226  | 0.457907     | 0.016544386 |
| 2          | rs1517707     | 0.202509  | 0.248978     | 0.016553268 |
| 20         | rs1343178     | 0.273381  | 0.324251     | 0.016553268 |
| 22         | rs137205      | 0.367384  | 0.316076     | 0.016553268 |
| 6          | rs2055261     | 0.431408  | 0.486376     | 0.016562155 |
| 9          | rs2031970     | 0.263441  | 0.218516     | 0.016562155 |
| 16         | rs12149938    | 0.317204  | 0.37001      | 0.016562155 |
| 18         | rs2712767     | 0.530466  | 0.476134     | 0.016562155 |
| 20         | rs805754      | 0.227599  | 0.185602     | 0.016562155 |
| 5          | rs6876198     | 0.28777   | 0.240096     | 0.016571047 |
| 5          | rs463219      | 0.317204  | 0.269336     | 0.016571047 |
| 6          | rs6927011     | 0.256272  | 0.305593     | 0.016571047 |
| 11         | rs10501087    | 0.164875  | 0.209271     | 0.016571047 |
| 4          | rs3796660     | 0.102151  | 0.0732538    | 0.016579943 |
| 5          | rs10050653    | 0.512545  | 0.458631     | 0.016579943 |
| 12         | rs991427      | 0.154122  | 0.118869     | 0.016588844 |
| 13         | rs9507991     | 0.16129   | 0.205762     | 0.016588844 |
| 15         | rs7170841     | 0.107914  | 0.146458     | 0.016588844 |
| 1          | rs443850      | 0.250896  | 0.301193     | 0.016597751 |
| 3          | rs1398634     | 0.201439  | 0.160824     | 0.016606662 |
| 10         | rs10884340    | 0.34767   | 0.4016       | 0.016606662 |
| 11         | rs10832515    | 0.232852  | 0.281986     | 0.016606662 |
| 3          | SNP_A-1957820 | 0.0845324 | 0.120143     | 0.016615578 |
| 4          | rs1450140     | 0.393502  | 0.448517     | 0.016615578 |
| 12         | rs7961901     | 0.269784  | 0.224267     | 0.016615578 |
| 12         | rs2373461     | 0.0268817 | 0.0498634    | 0.016615578 |
| 3          | rs1354197     | 0.148746  | 0.190996     | 0.016633426 |
| 6          | rs9396195     | 0.0376344 | 0.0642296    | 0.016633426 |
| 13         | rs4619293     | 0.241007  | 0.196727     | 0.016633426 |
| 20         | rs6079649     | 0.226619  | 0.183646     | 0.016633426 |
| 7          | rs4726344     | 0.464158  | 0.410763     | 0.016642357 |
| 11         | rs7395662     | 0.335125  | 0.388016     | 0.016642357 |
| 16         | rs8046766     | 0.284946  | 0.238225     | 0.016642357 |
| 1          | rs10801805    | 0.413669  | 0.360922     | 0.016651293 |
| 3          | rs711967      | 0.401434  | 0.455907     | 0.016651293 |
| 5          | rs4527556     | 0.0322581 | 0.0575417    | 0.016651293 |
| 11         | rs4639931     | 0.154122  | 0.19748      | 0.016651293 |
| 12         | rs1867003     | 0.422939  | 0.369802     | 0.016651293 |
| 18         | rs13381824    | 0.340502  | 0.393149     | 0.016651293 |
| 21         | rs2833555     | 0.0985663 | 0.135945     | 0.016651293 |
| 1          | rs1234285     | 0.491039  | 0.436903     | 0.016660234 |
| 5          | rs271913      | 0.396057  | 0.344581     | 0.016660234 |
| 18         | rs8094588     | 0.333333  | 0.386882     | 0.016660234 |
| 13         | rs994513      | 0.167266  | 0.212142     | 0.01666918  |
| 18         | rs7229850     | 0.137993  | 0.179837     | 0.01666918  |
| 13         | rs17067931    | 0.0322581 | 0.057712     | 0.016678131 |
| 17         | rs4496207     | 0.283154  | 0.236187     | 0.016678131 |



Table DS2: All SNPs tested for association (RDC SABP vs. controls) with the Cochran-Armitage trend test and significant at the p=0.05 threshold.

| chromosome | SNP        | MAF_cases | MAF_controls | p_value     |
|------------|------------|-----------|--------------|-------------|
| 1          | rs2746543  | 0.333333  | 0.283719     | 0.016687086 |
| 2          | rs1355847  | 0.329749  | 0.382453     | 0.016687086 |
| 2          | rs6544416  | 0.408273  | 0.355877     | 0.016696047 |
| 2          | rs1037173  | 0.411871  | 0.466724     | 0.016696047 |
| 20         | rs6109593  | 0.0573477 | 0.0877433    | 0.016696047 |
| 1          | rs7547190  | 0.16129   | 0.124829     | 0.016705013 |
| 2          | rs10173173 | 0.365591  | 0.315036     | 0.016705013 |
| 14         | rs9322961  | 0.258065  | 0.308819     | 0.016705013 |
| 1          | rs12407953 | 0.0340502 | 0.059536     | 0.016713984 |
| 1          | rs1687061  | 0.229391  | 0.186753     | 0.016722959 |
| 2          | rs10930892 | 0.130824  | 0.0976816    | 0.016722959 |
| 11         | rs586662   | 0.305755  | 0.257416     | 0.016722959 |
| 12         | rs9669600  | 0.510753  | 0.456574     | 0.016722959 |
| 22         | rs6006904  | 0.118182  | 0.0870604    | 0.016722959 |
| 2          | rs1641147  | 0.42446   | 0.479911     | 0.016740926 |
| 7          | rs17310949 | 0.238351  | 0.194927     | 0.016740926 |
| 10         | rs10999500 | 0.357401  | 0.411474     | 0.016740926 |
| 10         | rs7920282  | 0.112903  | 0.0827375    | 0.016740926 |
| 1          | rs11587876 | 0.236559  | 0.193186     | 0.016758912 |
| 3          | rs1393367  | 0.320789  | 0.373383     | 0.016758912 |
| 22         | rs3810973  | 0.277778  | 0.231674     | 0.016758912 |
| 12         | rs7960706  | 0.469534  | 0.415901     | 0.016767912 |
| 9          | rs870463   | 0.316547  | 0.268484     | 0.016776918 |
| 12         | rs11180419 | 0.172043  | 0.134117     | 0.016776918 |
| 21         | rs2834844  | 0.100719  | 0.137649     | 0.016776918 |
| 22         | rs3810974  | 0.277778  | 0.231687     | 0.016776918 |
| 1          | rs780082   | 0.275986  | 0.327257     | 0.016785928 |
| 10         | rs3122227  | 0.206093  | 0.165246     | 0.016785928 |
| 17         | rs4584886  | 0.359206  | 0.308151     | 0.016785928 |
| 1          | rs1145535  | 0.391697  | 0.446204     | 0.016794944 |
| 8          | rs4631498  | 0.155914  | 0.119761     | 0.016794944 |
| 4          | rs1512949  | 0.206093  | 0.165872     | 0.016803964 |
| 14         | rs2369898  | 0.521505  | 0.466951     | 0.016803964 |
| 1          | rs2807562  | 0.250896  | 0.206333     | 0.01681299  |
| 2          | rs2367957  | 0.401434  | 0.349693     | 0.01681299  |
| 2          | rs6431472  | 0.198925  | 0.158433     | 0.01681299  |
| 5          | rs11738537 | 0.222222  | 0.179714     | 0.01681299  |
| 17         | rs203457   | 0.437276  | 0.383606     | 0.01681299  |
| 21         | rs2824060  | 0.234767  | 0.283692     | 0.01681299  |
| 14         | rs2352906  | 0.169065  | 0.131346     | 0.016831056 |
| 6          | rs2776892  | 0.100358  | 0.0718665    | 0.016840097 |
| 10         | rs1570427  | 0.102151  | 0.138671     | 0.016840097 |
| 12         | rs2374670  | 0.329749  | 0.382383     | 0.016840097 |
| 20         | rs6110699  | 0.162455  | 0.125426     | 0.016840097 |
| 21         | rs2075899  | 0.207885  | 0.255109     | 0.016840097 |
| 11         | rs1498477  | 0.0770609 | 0.111244     | 0.016849142 |
| 12         | rs17026787 | 0.310036  | 0.261856     | 0.016849142 |
| 12         | rs7295176  | 0.295699  | 0.248551     | 0.016849142 |
| 11         | rs12365014 | 0.335125  | 0.387943     | 0.016867248 |
| 11         | rs1397727  | 0.154122  | 0.196459     | 0.016867248 |
| 2          | rs1404182  | 0.109319  | 0.0794408    | 0.016876309 |
| 5          | rs13182871 | 0.281362  | 0.234503     | 0.016876309 |

Table DS2: All SNPs tested for association (RDC SABP vs. controls) with the Cochran-Armitage trend test and significant at the p=0.05 threshold.

| chromosome | SNP        | MAF_cases | MAF_controls | p_value     |
|------------|------------|-----------|--------------|-------------|
| 13         | rs10492434 | 0.225806  | 0.182948     | 0.016885374 |
| 16         | rs2024447  | 0.408602  | 0.463203     | 0.016885374 |
| 1          | rs10494368 | 0.125899  | 0.0935583    | 0.016894445 |
| 9          | rs7860480  | 0.062724  | 0.0941437    | 0.016894445 |
| 12         | rs11105842 | 0.417266  | 0.36359      | 0.016894445 |
| 8          | rs4466418  | 0.386691  | 0.441417     | 0.016903521 |
| 18         | rs7235529  | 0.0949821 | 0.0672126    | 0.016903521 |
| 3          | rs3811686  | 0.0848375 | 0.12056      | 0.016912601 |
| 4          | rs13126656 | 0.255396  | 0.210535     | 0.016912601 |
| 21         | rs1734930  | 0.31362   | 0.265188     | 0.016912601 |
| 5          | rs7730403  | 0.480287  | 0.42631      | 0.016921687 |
| 5          | rs10472388 | 0.0341727 | 0.0593249    | 0.016930778 |
| 1          | rs2644457  | 0.0519713 | 0.0818275    | 0.016939874 |
| 3          | rs1523109  | 0.234767  | 0.191888     | 0.016939874 |
| 11         | rs1400386  | 0.109319  | 0.0790191    | 0.016939874 |
| 12         | rs7309484  | 0.205036  | 0.163714     | 0.016939874 |
| 1          | rs17742601 | 0.0953237 | 0.131301     | 0.016948974 |
| 5          | rs7445841  | 0.376344  | 0.324864     | 0.016948974 |
| 10         | rs11195324 | 0.103943  | 0.14062      | 0.016948974 |
| 12         | rs4765417  | 0.0974729 | 0.134412     | 0.016948974 |
| 20         | rs1002120  | 0.106115  | 0.143975     | 0.016948974 |
| 6          | rs4945783  | 0.078853  | 0.112645     | 0.01695808  |
| 2          | rs10185455 | 0.204301  | 0.251364     | 0.016967191 |
| 7          | rs11980485 | 0.435484  | 0.49046      | 0.016967191 |
| 8          | rs17659540 | 0.51083   | 0.455521     | 0.016967191 |
| 12         | rs10841059 | 0.396739  | 0.344539     | 0.016967191 |
| 6          | rs10807242 | 0.417563  | 0.472411     | 0.016976307 |
| 7          | rs10954365 | 0.27957   | 0.23339      | 0.016976307 |
| 8          | rs10504398 | 0.176259  | 0.138113     | 0.016976307 |
| 10         | rs7894587  | 0.514337  | 0.459796     | 0.016976307 |
| 1          | rs2795417  | 0.0521583 | 0.0820845    | 0.016985428 |
| 6          | rs6912552  | 0.277778  | 0.328903     | 0.016985428 |
| 8          | rs7461351  | 0.315412  | 0.367757     | 0.016985428 |
| 14         | rs2254973  | 0.246403  | 0.29571      | 0.016985428 |
| 3          | rs9833997  | 0.396057  | 0.344475     | 0.017003685 |
| 4          | rs1503881  | 0.317204  | 0.268301     | 0.017003685 |
| 6          | rs408359   | 0.0884477 | 0.0614125    | 0.017003685 |
| 3          | rs2526747  | 0.393885  | 0.447835     | 0.017012822 |
| 6          | rs6913994  | 0.367384  | 0.316292     | 0.017012822 |
| 9          | rs16922143 | 0.245487  | 0.294981     | 0.017021963 |
| 1          | rs4603104  | 0.125448  | 0.0932925    | 0.017031109 |
| 2          | rs13411233 | 0.231183  | 0.188075     | 0.017031109 |
| 4          | rs7660368  | 0.335125  | 0.387602     | 0.017031109 |
| 5          | rs7706238  | 0.33871   | 0.289142     | 0.017031109 |
| 12         | rs10735364 | 0.18638   | 0.232265     | 0.017031109 |
| 1          | rs527442   | 0.107273  | 0.145613     | 0.01704026  |
| 1          | rs2795408  | 0.0521583 | 0.081998     | 0.01704026  |
| 10         | rs10887878 | 0.134409  | 0.100955     | 0.01704026  |
| 11         | rs984496   | 0.491039  | 0.436625     | 0.01704026  |
| 11         | rs1690812  | 0.378136  | 0.32605      | 0.01704026  |
| 11         | rs606803   | 0.376344  | 0.324591     | 0.01704026  |
| 12         | rs11182405 | 0.062724  | 0.093633     | 0.01704026  |

Table DS2: All SNPs tested for association (RDC SABP vs. controls) with the Cochran-Armitage trend test and significant at the p=0.05 threshold.

| chromosome | SNP        | MAF_cases | MAF_controls | p_value     |
|------------|------------|-----------|--------------|-------------|
| 4          | rs17033891 | 0.122744  | 0.163422     | 0.017049417 |
| 4          | rs230505   | 0.455036  | 0.401771     | 0.017058579 |
| 10         | rs3125327  | 0.344086  | 0.293697     | 0.017058579 |
| 11         | rs6485884  | 0.335125  | 0.387866     | 0.017058579 |
| 19         | rs741584   | 0.370968  | 0.319482     | 0.017076917 |
| 5          | rs252614   | 0.293907  | 0.24684      | 0.017086094 |
| 12         | rs12812739 | 0.259857  | 0.214748     | 0.017086094 |
| 15         | rs876383   | 0.494604  | 0.440204     | 0.017086094 |
| 21         | rs9981939  | 0.280576  | 0.234322     | 0.017095275 |
| 1          | rs859388   | 0.464158  | 0.410082     | 0.017104462 |
| 8          | rs7832096  | 0.281362  | 0.234753     | 0.017104462 |
| 10         | rs3125331  | 0.322581  | 0.273145     | 0.017104462 |
| 17         | rs11656166 | 0.0824373 | 0.118058     | 0.017104462 |
| 1          | rs6701504  | 0.28853   | 0.242342     | 0.017113655 |
| 3          | rs349543   | 0.0752688 | 0.0510239    | 0.017113655 |
| 17         | rs7222197  | 0.327957  | 0.278289     | 0.017113655 |
| 1          | rs4649904  | 0.123656  | 0.0918089    | 0.017132054 |
| 2          | rs918290   | 0.0376344 | 0.0635029    | 0.017132054 |
| 7          | rs10241383 | 0.358423  | 0.307771     | 0.017132054 |
| 11         | rs4882017  | 0.335125  | 0.387866     | 0.017132054 |
| 1          | rs577528   | 0.25448   | 0.304799     | 0.017141261 |
| 2          | rs11127466 | 0.383513  | 0.33197      | 0.017141261 |
| 8          | rs1660332  | 0.444444  | 0.39203      | 0.017141261 |
| 12         | rs16930563 | 0.136201  | 0.102315     | 0.017141261 |
| 16         | rs10514389 | 0.324373  | 0.275357     | 0.017141261 |
| 19         | rs11084582 | 0.44086   | 0.388037     | 0.017141261 |
| 4          | rs4693920  | 0.105735  | 0.0760164    | 0.017150474 |
| 8          | rs4841200  | 0.214029  | 0.17252      | 0.017150474 |
| 1          | rs9436398  | 0.329749  | 0.28043      | 0.017159691 |
| 11         | rs721238   | 0.106115  | 0.0764244    | 0.017159691 |
| 5          | rs11167927 | 0.433692  | 0.381498     | 0.017168914 |
| 22         | rs4838830  | 0.277778  | 0.231845     | 0.017168914 |
| 2          | rs12478344 | 0.302158  | 0.354394     | 0.017187375 |
| 5          | rs2062695  | 0.405018  | 0.4591       | 0.017187375 |
| 22         | rs9617024  | 0.277778  | 0.231857     | 0.017187375 |
| 3          | rs1436832  | 0.316547  | 0.368744     | 0.017196613 |
| 4          | rs921729   | 0.105735  | 0.143514     | 0.017196613 |
| 2          | rs6724073  | 0.197842  | 0.244793     | 0.017205856 |
| 6          | rs2322433  | 0.521505  | 0.466917     | 0.017205856 |
| 7          | rs6977656  | 0.229391  | 0.186562     | 0.017205856 |
| 13         | rs3848084  | 0.297491  | 0.250768     | 0.017205856 |
| 14         | rs12717393 | 0.168459  | 0.131005     | 0.017205856 |
| 16         | rs7204765  | 0.516245  | 0.461866     | 0.017205856 |
| 1          | rs10494367 | 0.125448  | 0.0933879    | 0.017215104 |
| 9          | rs1327398  | 0.078853  | 0.0539249    | 0.017215104 |
| 16         | rs13333251 | 0.494624  | 0.440415     | 0.017215104 |
| 6          | rs603284   | 0.257194  | 0.307286     | 0.017224358 |
| 2          | rs4670906  | 0.401434  | 0.349864     | 0.017233616 |
| 3          | rs1440518  | 0.544803  | 0.49029      | 0.017233616 |
| 10         | rs1592037  | 0.232014  | 0.281601     | 0.017233616 |
| 10         | rs11195323 | 0.103943  | 0.140572     | 0.017233616 |
| 14         | rs10483639 | 0.243728  | 0.200102     | 0.017233616 |

Table DS2: All SNPs tested for association (RDC SABP vs. controls) with the Cochran-Armitage trend test and significant at the p=0.05 threshold.

| chromosome | SNP        | MAF_cases | MAF_controls | p_value     |
|------------|------------|-----------|--------------|-------------|
| 13         | rs2476731  | 0.306452  | 0.259366     | 0.01724288  |
| 3          | rs1524557  | 0.360215  | 0.309946     | 0.017252149 |
| 2          | rs12478317 | 0.22043   | 0.267973     | 0.017261423 |
| 3          | rs1320160  | 0.113309  | 0.151929     | 0.017261423 |
| 4          | rs12498640 | 0.27957   | 0.330837     | 0.017270702 |
| 11         | rs4937548  | 0.439068  | 0.493015     | 0.017270702 |
| 19         | rs2278260  | 0.541219  | 0.486362     | 0.017270702 |
| 1          | rs12087645 | 0.0305755 | 0.0548178    | 0.017279986 |
| 2          | rs17608651 | 0.218638  | 0.266599     | 0.017279986 |
| 4          | rs10517982 | 0.155914  | 0.12015      | 0.017279986 |
| 8          | rs997084   | 0.133094  | 0.100136     | 0.017279986 |
| 11         | rs10766928 | 0.154122  | 0.197274     | 0.017279986 |
| 17         | rs4925126  | 0.424731  | 0.371506     | 0.017279986 |
| 1          | rs10157397 | 0.236559  | 0.285276     | 0.017289275 |
| 8          | rs12680380 | 0.105735  | 0.144001     | 0.017289275 |
| 15         | rs1863512  | 0.232975  | 0.281037     | 0.017289275 |
| 12         | rs1245652  | 0.351986  | 0.405451     | 0.01729857  |
| 1          | rs11206628 | 0.318996  | 0.371204     | 0.01730787  |
| 1          | rs2492279  | 0.216846  | 0.264726     | 0.01730787  |
| 5          | rs6894471  | 0.210432  | 0.169338     | 0.01730787  |
| 7          | rs2941538  | 0.376812  | 0.325665     | 0.01730787  |
| 10         | rs1414681  | 0.387097  | 0.441377     | 0.01730787  |
| 12         | rs10745752 | 0.177419  | 0.139551     | 0.01730787  |
| 3          | rs4685070  | 0.38172   | 0.330722     | 0.017317174 |
| 8          | rs7014327  | 0.333333  | 0.284056     | 0.017317174 |
| 10         | rs7083541  | 0.53777   | 0.483294     | 0.017317174 |
| 3          | rs6443100  | 0.435484  | 0.38144      | 0.017326484 |
| 7          | rs799578   | 0.462366  | 0.409168     | 0.017326484 |
| 12         | rs11049715 | 0.336918  | 0.287688     | 0.017326484 |
| 3          | rs6781156  | 0.456989  | 0.403958     | 0.0173358   |
| 6          | rs9371823  | 0.433692  | 0.488253     | 0.0173358   |
| 11         | rs10766922 | 0.154122  | 0.197207     | 0.0173358   |
| 16         | rs7195891  | 0.242806  | 0.292491     | 0.0173358   |
| 13         | rs2036113  | 0.273381  | 0.324311     | 0.017354446 |
| 16         | rs8050643  | 0.492832  | 0.43912      | 0.017363776 |
| 20         | rs1076688  | 0.530466  | 0.475826     | 0.017363776 |
| 2          | rs7368833  | 0.263538  | 0.313565     | 0.017373112 |
| 7          | rs2237702  | 0.47491   | 0.421151     | 0.017391799 |
| 22         | rs5752591  | 0.292115  | 0.343154     | 0.017391799 |
| 22         | rs5750373  | 0.413978  | 0.361622     | 0.017391799 |
| 1          | rs235493   | 0.229391  | 0.186967     | 0.017401151 |
| 14         | rs10483400 | 0.126354  | 0.0942078    | 0.017401151 |
| 15         | rs17646800 | 0.146953  | 0.189544     | 0.017401151 |
| 5          | rs17114459 | 0.139493  | 0.105119     | 0.017410507 |
| 18         | rs17642569 | 0.340502  | 0.290515     | 0.017410507 |
| 3          | rs3101096  | 0.424731  | 0.372659     | 0.017419869 |
| 6          | rs221527   | 0.200717  | 0.160477     | 0.017419869 |
| 8          | rs13365225 | 0.201439  | 0.161104     | 0.017419869 |
| 17         | rs7207388  | 0.172662  | 0.217962     | 0.017419869 |
| 10         | rs10795679 | 0.136201  | 0.102691     | 0.017429236 |
| 17         | rs10514925 | 0.0985663 | 0.0705521    | 0.017429236 |
| 7          | rs2158889  | 0.33213   | 0.28289      | 0.017447986 |

Table DS2: All SNPs tested for association (RDC SABP vs. controls) with the Cochran-Armitage trend test and significant at the p=0.05 threshold.

| chromosome | SNP           | MAF_cases | MAF_controls | p_value     |
|------------|---------------|-----------|--------------|-------------|
| 17         | rs7217540     | 0.0322581 | 0.0568801    | 0.017457368 |
| 2          | rs7591263     | 0.175627  | 0.137649     | 0.017476149 |
| 8          | rs6995845     | 0.295699  | 0.347782     | 0.017476149 |
| 20         | rs459681      | 0.326165  | 0.379809     | 0.017476149 |
| 1          | SNP_A-2038955 | 0.184588  | 0.229891     | 0.017485548 |
| 1          | rs7524931     | 0.139785  | 0.180935     | 0.017485548 |
| 2          | rs7558082     | 0.176259  | 0.138595     | 0.017494951 |
| 14         | rs8022637     | 0.145161  | 0.11077      | 0.017494951 |
| 14         | rs847314      | 0.327957  | 0.38032      | 0.017494951 |
| 18         | rs2303508     | 0.430108  | 0.484678     | 0.017494951 |
| 1          | rs4582848     | 0.270609  | 0.320954     | 0.01750436  |
| 21         | rs7277699     | 0.113309  | 0.0829642    | 0.01750436  |
| 12         | rs897658      | 0.437276  | 0.490798     | 0.017513774 |
| 1          | rs6664177     | 0.329749  | 0.280409     | 0.017523193 |
| 2          | rs17644183    | 0.34767   | 0.400919     | 0.017523193 |
| 11         | rs1268309     | 0.342294  | 0.396204     | 0.017523193 |
| 3          | rs12631421    | 0.378136  | 0.327545     | 0.017532617 |
| 7          | rs6971537     | 0.0896057 | 0.125085     | 0.017532617 |
| 1          | rs287235      | 0.286738  | 0.240798     | 0.017542047 |
| 4          | rs1440312     | 0.239209  | 0.195741     | 0.017542047 |
| 12         | rs11059501    | 0.419355  | 0.366814     | 0.017542047 |
| 6          | rs16885480    | 0.0824373 | 0.0568995    | 0.017551481 |
| 15         | rs17665327    | 0.109319  | 0.0793327    | 0.017551481 |
| 17         | rs8081885     | 0.0467626 | 0.0743013    | 0.017551481 |
| 1          | rs12087337    | 0.124101  | 0.0924284    | 0.017560921 |
| 8          | rs10112387    | 0.345878  | 0.295943     | 0.017560921 |
| 11         | rs1371329     | 0.357401  | 0.410891     | 0.017560921 |
| 18         | rs4941349     | 0.543011  | 0.488594     | 0.017560921 |
| 6          | rs10499028    | 0.203237  | 0.162526     | 0.017570367 |
| 8          | rs10086105    | 0.360215  | 0.310157     | 0.017570367 |
| 8          | rs4240626     | 0.280576  | 0.234173     | 0.017570367 |
| 10         | rs10883782    | 0.204301  | 0.163432     | 0.017570367 |
| 12         | rs11048790    | 0.0716846 | 0.104465     | 0.017570367 |
| 21         | rs1556277     | 0.435484  | 0.489071     | 0.017570367 |
| 3          | rs7625438     | 0.102518  | 0.139571     | 0.017579817 |
| 3          | rs9877549     | 0.0917266 | 0.0643952    | 0.017579817 |
| 5          | rs11742602    | 0.480287  | 0.426601     | 0.017579817 |
| 6          | rs234915      | 0.482079  | 0.429326     | 0.017579817 |
| 2          | rs13390691    | 0.202509  | 0.248805     | 0.017589273 |
| 2          | rs10183022    | 0.451613  | 0.398499     | 0.017589273 |
| 7          | rs2525734     | 0.182796  | 0.227861     | 0.017589273 |
| 2          | rs12693613    | 0.157706  | 0.121847     | 0.017598734 |
| 3          | rs17657688    | 0.405018  | 0.458759     | 0.017598734 |
| 9          | rs10733610    | 0.200717  | 0.246508     | 0.017598734 |
| 16         | rs11149692    | 0.229391  | 0.187223     | 0.017617672 |
| 4          | rs300913      | 0.412186  | 0.3597       | 0.017627149 |
| 11         | rs11220773    | 0.376344  | 0.324881     | 0.017627149 |
| 15         | rs7403502     | 0.253597  | 0.303614     | 0.017627149 |
| 5          | rs6886510     | 0.287004  | 0.239672     | 0.017636631 |
| 4          | rs1013029     | 0.284173  | 0.335376     | 0.017646118 |
| 4          | rs2059107     | 0.18638   | 0.147189     | 0.017655611 |
| 10         | rs7101216     | 0.433453  | 0.381139     | 0.017655611 |

Table DS2: All SNPs tested for association (RDC SABP vs. controls) with the Cochran-Armitage trend test and significant at the p=0.05 threshold.

| chromosome | SNP        | MAF_cases | MAF_controls | p_value     |
|------------|------------|-----------|--------------|-------------|
| 12         | rs10770599 | 0.27957   | 0.233538     | 0.017655611 |
| 12         | rs17802036 | 0.240143  | 0.289267     | 0.017665108 |
| 7          | rs4541797  | 0.0770609 | 0.1106       | 0.017674612 |
| 14         | rs847317   | 0.333333  | 0.38586      | 0.017674612 |
| 2          | rs1545359  | 0.0647482 | 0.0965152    | 0.01768412  |
| 4          | rs6830360  | 0.16129   | 0.124957     | 0.01768412  |
| 7          | rs1345526  | 0.411871  | 0.465746     | 0.01768412  |
| 8          | rs2053340  | 0.125899  | 0.0939734    | 0.01768412  |
| 1          | rs4657581  | 0.285971  | 0.337023     | 0.017693634 |
| 2          | rs1982446  | 0.215054  | 0.173935     | 0.017693634 |
| 5          | rs12658367 | 0.358423  | 0.411745     | 0.017693634 |
| 12         | rs9788199  | 0.123656  | 0.163547     | 0.017693634 |
| 18         | rs2196113  | 0.152878  | 0.195504     | 0.017693634 |
| 2          | rs17576915 | 0.225806  | 0.183322     | 0.017703153 |
| 4          | rs1391262  | 0.406137  | 0.352931     | 0.017703153 |
| 20         | rs478451   | 0.476619  | 0.422514     | 0.017712677 |
| 5          | rs6887852  | 0.209677  | 0.16888      | 0.017722207 |
| 4          | rs728171   | 0.467742  | 0.413969     | 0.017731741 |
| 7          | rs6972902  | 0.120072  | 0.158478     | 0.017731741 |
| 8          | rs7823934  | 0.28777   | 0.24088      | 0.017731741 |
| 19         | rs1912579  | 0.118705  | 0.0875427    | 0.017731741 |
| 5          | rs252616   | 0.293907  | 0.247017     | 0.017741281 |
| 11         | rs480569   | 0.138489  | 0.104905     | 0.017741281 |
| 11         | rs4754668  | 0.383094  | 0.436797     | 0.017750827 |
| 12         | rs17441172 | 0.205036  | 0.163996     | 0.017750827 |
| 13         | rs9796066  | 0.422939  | 0.370358     | 0.017750827 |
| 14         | rs1892220  | 0.163082  | 0.126917     | 0.017750827 |
| 6          | rs9293854  | 0.361511  | 0.413858     | 0.017760378 |
| 20         | rs6015703  | 0.247312  | 0.204089     | 0.017760378 |
| 10         | rs7478060  | 0.478495  | 0.425749     | 0.017769934 |
| 5          | rs6877525  | 0.415468  | 0.469836     | 0.017779495 |
| 7          | rs2040897  | 0.354839  | 0.408456     | 0.017779495 |
| 5          | rs2935637  | 0.306452  | 0.358555     | 0.017798634 |
| 13         | rs9316188  | 0.198925  | 0.244978     | 0.017798634 |
| 12         | rs17820032 | 0.120939  | 0.0900409    | 0.017808211 |
| 15         | rs1712391  | 0.102151  | 0.0732538    | 0.017808211 |
| 4          | rs843596   | 0.456989  | 0.404121     | 0.017817794 |
| 7          | rs10233124 | 0.106115  | 0.07691      | 0.017817794 |
| 9          | rs10810821 | 0.249104  | 0.298123     | 0.017827381 |
| 11         | rs652769   | 0.37276   | 0.321587     | 0.017827381 |
| 11         | rs674682   | 0.37276   | 0.321587     | 0.017827381 |
| 13         | rs7333778  | 0.188172  | 0.148893     | 0.017827381 |
| 18         | rs12967871 | 0.478495  | 0.425162     | 0.017827381 |
| 1          | rs1318222  | 0.0949821 | 0.0672455    | 0.017836975 |
| 8          | rs9298430  | 0.345878  | 0.296082     | 0.017856177 |
| 2          | rs11678785 | 0.415468  | 0.363574     | 0.017865786 |
| 11         | rs17693632 | 0.213262  | 0.172232     | 0.017865786 |
| 13         | rs2147453  | 0.448029  | 0.395642     | 0.017865786 |
| 1          | rs6687387  | 0.40681   | 0.354415     | 0.017875401 |
| 3          | rs4687304  | 0.34767   | 0.297854     | 0.017875401 |
| 17         | rs2879165  | 0.428315  | 0.375085     | 0.017875401 |
| 4          | rs13147741 | 0.25448   | 0.210167     | 0.017885021 |

Table DS2: All SNPs tested for association (RDC SABP vs. controls) with the Cochran-Armitage trend test and significant at the p=0.05 threshold.

| chromosome | SNP        | MAF_cases | MAF_controls | p_value     |
|------------|------------|-----------|--------------|-------------|
| 13         | rs9575378  | 0.255396  | 0.305177     | 0.017885021 |
| 17         | rs8064833  | 0.103943  | 0.0750597    | 0.017885021 |
| 2          | rs1397088  | 0.0953237 | 0.0678024    | 0.017894646 |
| 2          | rs4673215  | 0.241935  | 0.29134      | 0.017894646 |
| 7          | rs3094893  | 0.310036  | 0.261751     | 0.017894646 |
| 1          | rs6675409  | 0.401434  | 0.350034     | 0.017904277 |
| 4          | rs4690569  | 0.311828  | 0.264135     | 0.017904277 |
| 6          | rs3130233  | 0.439068  | 0.492494     | 0.017904277 |
| 6          | rs17745356 | 0.415468  | 0.363497     | 0.017904277 |
| 14         | rs7160250  | 0.521505  | 0.467462     | 0.017904277 |
| 15         | rs2602141  | 0.251799  | 0.300068     | 0.017904277 |
| 16         | rs12596563 | 0.307554  | 0.359748     | 0.017904277 |
| 11         | rs1351517  | 0.447842  | 0.393903     | 0.017913913 |
| 13         | rs9511097  | 0.417563  | 0.47138      | 0.017913913 |
| 7          | rs893785   | 0.444245  | 0.498296     | 0.017933201 |
| 8          | rs7013186  | 0.50361   | 0.449523     | 0.017933201 |
| 8          | rs4421354  | 0.541219  | 0.486882     | 0.017933201 |
| 8          | rs17053536 | 0.0306859 | 0.0550239    | 0.017933201 |
| 1          | rs1455703  | 0.23741   | 0.285958     | 0.017942853 |
| 3          | rs4955692  | 0.53405   | 0.479223     | 0.017942853 |
| 5          | rs4415088  | 0.270609  | 0.225009     | 0.01795251  |
| 7          | rs12698901 | 0.234767  | 0.191482     | 0.01795251  |
| 10         | rs16931765 | 0.163082  | 0.126789     | 0.01795251  |
| 13         | rs9599174  | 0.213262  | 0.172566     | 0.01795251  |
| 14         | rs2190508  | 0.345878  | 0.398773     | 0.01795251  |
| 5          | rs4868746  | 0.449821  | 0.397506     | 0.017962173 |
| 18         | rs4799791  | 0.0645161 | 0.0956433    | 0.017962173 |
| 2          | rs1446355  | 0.243728  | 0.200579     | 0.017971841 |
| 4          | rs10017663 | 0.329749  | 0.382112     | 0.017971841 |
| 2          | rs16865965 | 0.179211  | 0.141664     | 0.017981515 |
| 2          | rs17017756 | 0.154676  | 0.197207     | 0.017981515 |
| 7          | rs4960617  | 0.0949821 | 0.0676781    | 0.017981515 |
| 13         | rs3829342  | 0.0863309 | 0.0602595    | 0.017981515 |
| 16         | rs8050659  | 0.492832  | 0.439482     | 0.017981515 |
| 9          | rs10869425 | 0.512635  | 0.459611     | 0.017991194 |
| 10         | rs16917330 | 0.0809353 | 0.11431      | 0.018000878 |
| 12         | rs4255604  | 0.0949821 | 0.0675077    | 0.018000878 |
| 1          | rs1926306  | 0.128159  | 0.168432     | 0.018010568 |
| 7          | rs2171356  | 0.0878136 | 0.0616883    | 0.018010568 |
| 18         | rs17798773 | 0.253597  | 0.209128     | 0.018010568 |
| 1          | rs2489189  | 0.0340502 | 0.059094     | 0.018020263 |
| 9          | rs829311   | 0.376344  | 0.430205     | 0.018029963 |
| 8          | rs11136442 | 0.370504  | 0.424165     | 0.018039669 |
| 13         | rs9316186  | 0.198925  | 0.244888     | 0.018039669 |
| 16         | rs1549268  | 0.286738  | 0.241385     | 0.018039669 |
| 18         | rs12953454 | 0.318996  | 0.37044      | 0.018039669 |
| 22         | rs132438   | 0.123188  | 0.0916382    | 0.018039669 |
| 13         | rs9319399  | 0.196043  | 0.156622     | 0.01804938  |
| 8          | rs7843557  | 0.383513  | 0.332254     | 0.018059097 |
| 9          | rs1927898  | 0.216846  | 0.264235     | 0.018068819 |
| 9          | rs10987598 | 0.182796  | 0.227676     | 0.018068819 |
| 5          | rs11746093 | 0.512545  | 0.4594       | 0.018078546 |

Table DS2: All SNPs tested for association (RDC SABP vs. controls) with the Cochran-Armitage trend test and significant at the p=0.05 threshold.

| chromosome | SNP        | MAF_cases | MAF_controls | p_value     |
|------------|------------|-----------|--------------|-------------|
| 11         | rs673798   | 0.37276   | 0.321696     | 0.018078546 |
| 1          | rs12066439 | 0.311828  | 0.264055     | 0.018088279 |
| 1          | rs3767910  | 0.163082  | 0.205963     | 0.018088279 |
| 1          | rs1213856  | 0.31295   | 0.364906     | 0.018088279 |
| 8          | rs17724226 | 0.410394  | 0.463981     | 0.018088279 |
| 20         | rs534498   | 0.250896  | 0.206726     | 0.018088279 |
| 5          | rs980496   | 0.116487  | 0.15529      | 0.018098017 |
| 8          | rs12708146 | 0.405018  | 0.45886      | 0.018098017 |
| 8          | rs7834730  | 0.345878  | 0.296183     | 0.018098017 |
| 8          | rs2981074  | 0.295699  | 0.346233     | 0.018098017 |
| 12         | rs4931161  | 0.274194  | 0.228932     | 0.018098017 |
| 18         | rs8094863  | 0.0681004 | 0.0995228    | 0.018098017 |
| 3          | rs3087253  | 0.534173  | 0.480232     | 0.018107761 |
| 5          | rs16882488 | 0.09319   | 0.0660988    | 0.018107761 |
| 1          | rs2819516  | 0.283154  | 0.236726     | 0.01811751  |
| 2          | rs10178350 | 0.329749  | 0.381561     | 0.01811751  |
| 5          | rs1422969  | 0.295699  | 0.248553     | 0.01811751  |
| 7          | rs4726348  | 0.350719  | 0.301498     | 0.01811751  |
| 16         | rs16974822 | 0.218638  | 0.177353     | 0.01811751  |
| 16         | rs17781978 | 0.257194  | 0.212726     | 0.01811751  |
| 3          | rs7638734  | 0.277778  | 0.328907     | 0.018127264 |
| 4          | rs2278149  | 0.16129   | 0.125085     | 0.018127264 |
| 5          | rs335207   | 0.0681004 | 0.0998977    | 0.018127264 |
| 5          | rs6891724  | 0.296763  | 0.249574     | 0.018127264 |
| 5          | rs2161430  | 0.295699  | 0.248552     | 0.018137024 |
| 10         | rs10906786 | 0.271739  | 0.321575     | 0.018137024 |
| 11         | rs2279533  | 0.224014  | 0.18188      | 0.018137024 |
| 11         | rs1849342  | 0.261649  | 0.216525     | 0.018137024 |
| 8          | rs6473569  | 0.34657   | 0.296625     | 0.01814679  |
| 13         | rs3742127  | 0.130824  | 0.0983635    | 0.01814679  |
| 7          | rs2855939  | 0.360215  | 0.413629     | 0.01815656  |
| 10         | rs2394272  | 0.471119  | 0.417603     | 0.01815656  |
| 9          | rs1854574  | 0.296763  | 0.347678     | 0.018166337 |
| 14         | rs2114616  | 0.231183  | 0.278971     | 0.018166337 |
| 17         | rs3091327  | 0.107527  | 0.0781676    | 0.018176118 |
| 11         | rs610728   | 0.446043  | 0.50017      | 0.018195698 |
| 13         | rs17057156 | 0.274194  | 0.324651     | 0.018195698 |
| 3          | rs1111622  | 0.155914  | 0.198194     | 0.018215299 |
| 6          | rs6921588  | 0.464029  | 0.411373     | 0.018215299 |
| 7          | rs215699   | 0.256272  | 0.306001     | 0.018215299 |
| 10         | rs992250   | 0.44086   | 0.38834      | 0.018215299 |
| 17         | rs4925123  | 0.426523  | 0.373722     | 0.018215299 |
| 22         | rs16993280 | 0.102151  | 0.138851     | 0.018215299 |
| 1          | rs1281001  | 0.426259  | 0.480586     | 0.018225108 |
| 13         | rs687582   | 0.179211  | 0.223985     | 0.018225108 |
| 8          | rs1025233  | 0.345878  | 0.296221     | 0.018234922 |
| 21         | rs1735936  | 0.428058  | 0.375767     | 0.018234922 |
| 2          | rs17390622 | 0.12724   | 0.094954     | 0.018244742 |
| 10         | rs11252746 | 0.164875  | 0.128537     | 0.018244742 |
| 2          | rs4487120  | 0.512545  | 0.458801     | 0.018254567 |
| 9          | rs7048037  | 0.362007  | 0.312202     | 0.018254567 |
| 3          | rs7372254  | 0.444444  | 0.392224     | 0.018264398 |



Table DS2: All SNPs tested for association (RDC SABP vs. controls) with the Cochran-Armitage trend test and significant at the p=0.05 threshold.

| chromosome | SNP           | MAF_cases | MAF_controls | p_value     |
|------------|---------------|-----------|--------------|-------------|
| 14         | rs7160247     | 0.215827  | 0.174728     | 0.018264398 |
| 8          | rs10808533    | 0.295699  | 0.347478     | 0.018284076 |
| 15         | rs2959014     | 0.146953  | 0.188544     | 0.018284076 |
| 14         | rs7153220     | 0.0734767 | 0.106474     | 0.018303776 |
| 9          | rs10738727    | 0.481949  | 0.428669     | 0.018313634 |
| 19         | rs17687371    | 0.154122  | 0.119406     | 0.018313634 |
| 14         | rs7493582     | 0.317204  | 0.269087     | 0.018323497 |
| 18         | rs1573388     | 0.227599  | 0.185198     | 0.018333366 |
| 1          | SNP_A-2135045 | 0.102518  | 0.0739857    | 0.018343241 |
| 7          | rs12538991    | 0.367384  | 0.420757     | 0.018343241 |
| 12         | rs527118      | 0.202509  | 0.162568     | 0.018343241 |
| 1          | rs11585820    | 0.143369  | 0.10971      | 0.018353121 |
| 1          | rs2795398     | 0.0519713 | 0.0814033    | 0.018353121 |
| 2          | rs10209188    | 0.157706  | 0.122018     | 0.018353121 |
| 2          | rs6761246     | 0.320789  | 0.372956     | 0.018353121 |
| 3          | rs1603492     | 0.302867  | 0.255956     | 0.018353121 |
| 6          | rs2745636     | 0.482079  | 0.429618     | 0.018353121 |
| 9          | rs10984840    | 0.266187  | 0.315736     | 0.018372897 |
| 10         | rs7080052     | 0.275986  | 0.230167     | 0.018372897 |
| 15         | rs11631663    | 0.473118  | 0.419959     | 0.018372897 |
| 1          | rs12079477    | 0.154122  | 0.119339     | 0.018382794 |
| 4          | rs10517625    | 0.123656  | 0.163596     | 0.018382794 |
| 9          | rs9696306     | 0.247312  | 0.296694     | 0.018382794 |
| 14         | rs1950668     | 0.379928  | 0.32879      | 0.018382794 |
| 9          | rs3849943     | 0.207885  | 0.254428     | 0.018392696 |
| 11         | rs2237914     | 0.428315  | 0.376234     | 0.018402603 |
| 7          | rs6459879     | 0.442652  | 0.496241     | 0.018412516 |
| 7          | rs318572      | 0.397849  | 0.346626     | 0.018422435 |
| 10         | rs7922846     | 0.297491  | 0.250511     | 0.018422435 |
| 14         | rs7142128     | 0.168459  | 0.131382     | 0.018422435 |
| 15         | rs16949681    | 0.243728  | 0.200649     | 0.018422435 |
| 16         | rs11860907    | 0.340502  | 0.393429     | 0.018422435 |
| 1          | rs1014098     | 0.149281  | 0.191011     | 0.018432359 |
| 5          | rs36715       | 0.216846  | 0.263543     | 0.018432359 |
| 18         | rs12960274    | 0.329137  | 0.280633     | 0.018432359 |
| 15         | rs10152457    | 0.0770609 | 0.0525777    | 0.018442289 |
| 4          | rs17375482    | 0.25448   | 0.210392     | 0.018452224 |
| 6          | rs2776797     | 0.259857  | 0.214845     | 0.018452224 |
| 10         | rs2279216     | 0.350719  | 0.300409     | 0.018452224 |
| 1          | rs6695961     | 0.133574  | 0.100886     | 0.018462164 |
| 3          | rs1166980     | 0.136201  | 0.176781     | 0.018462164 |
| 5          | rs17703748    | 0.0845324 | 0.0589438    | 0.01847211  |
| 19         | rs1433123     | 0.248201  | 0.297104     | 0.01847211  |
| 8          | rs10097414    | 0.345878  | 0.296322     | 0.018482062 |
| 8          | rs1159873     | 0.159498  | 0.202353     | 0.018482062 |
| 12         | rs10770590    | 0.232975  | 0.19063      | 0.018482062 |
| 12         | rs2113879     | 0.276978  | 0.231346     | 0.018482062 |
| 15         | rs11638893    | 0.5       | 0.446544     | 0.018482062 |
| 5          | rs702714      | 0.15233   | 0.117337     | 0.018492019 |
| 8          | rs10094069    | 0.508993  | 0.454592     | 0.018492019 |
| 11         | rs3016380     | 0.116906  | 0.155208     | 0.018492019 |
| 15         | rs11635392    | 0.456835  | 0.403281     | 0.018492019 |

Table DS2: All SNPs tested for association (RDC SABP vs. controls) with the Cochran-Armitage trend test and significant at the p=0.05 threshold.

| chromosome | SNP           | MAF_cases | MAF_controls | p_value     |
|------------|---------------|-----------|--------------|-------------|
| 2          | rs10180903    | 0.21147   | 0.171326     | 0.018501982 |
| 3          | rs1502298     | 0.150538  | 0.193108     | 0.018501982 |
| 11         | rs1944156     | 0.0806452 | 0.114008     | 0.018501982 |
| 1          | rs7538533     | 0.476703  | 0.423261     | 0.018511951 |
| 2          | rs6718607     | 0.286738  | 0.240286     | 0.018511951 |
| 2          | rs722082      | 0.0645161 | 0.0957411    | 0.018511951 |
| 11         | rs1807939     | 0.485663  | 0.432345     | 0.018511951 |
| 12         | rs10492314    | 0.0896057 | 0.0630324    | 0.018511951 |
| 14         | SNP_A-2215287 | 0.246403  | 0.202661     | 0.018511951 |
| 1          | rs6685823     | 0.340502  | 0.393258     | 0.018521924 |
| 2          | rs6435309     | 0.229391  | 0.187457     | 0.018521924 |
| 13         | rs719223      | 0.309353  | 0.360751     | 0.018521924 |
| 14         | rs4902923     | 0.351254  | 0.301398     | 0.018521924 |
| 4          | rs17577747    | 0.428058  | 0.375383     | 0.018531904 |
| 6          | rs2857161     | 0.433692  | 0.381171     | 0.018531904 |
| 8          | rs7341577     | 0.0809353 | 0.0558393    | 0.018531904 |
| 2          | rs847191      | 0.383513  | 0.436308     | 0.018541889 |
| 3          | rs1908599     | 0.184116  | 0.228698     | 0.018541889 |
| 14         | rs11848645    | 0.446237  | 0.50017      | 0.018541889 |
| 10         | rs1915428     | 0.322581  | 0.273765     | 0.018551879 |
| 4          | rs10518439    | 0.0770609 | 0.0526047    | 0.018561876 |
| 6          | rs6924993     | 0.386691  | 0.335663     | 0.018561876 |
| 11         | rs7479975     | 0.375451  | 0.428109     | 0.018571877 |
| 12         | rs4763171     | 0.311828  | 0.363791     | 0.018571877 |
| 12         | rs10773003    | 0.120504  | 0.0892491    | 0.018571877 |
| 11         | rs2231963     | 0.444043  | 0.391201     | 0.018581884 |
| 13         | rs7322803     | 0.244604  | 0.200987     | 0.018581884 |
| 9          | rs12003093    | 0.191756  | 0.237568     | 0.018591897 |
| 9          | rs10124632    | 0.216846  | 0.264045     | 0.018591897 |
| 4          | rs4834723     | 0.286738  | 0.337483     | 0.018601916 |
| 18         | rs4493146     | 0.228417  | 0.275792     | 0.018601916 |
| 9          | rs9694998     | 0.100358  | 0.0716962    | 0.01861194  |
| 12         | rs7485393     | 0.281362  | 0.235444     | 0.01861194  |
| 12         | rs4964996     | 0.385305  | 0.438118     | 0.01861194  |
| 15         | rs2059637     | 0.464029  | 0.410331     | 0.01861194  |
| 9          | rs12337165    | 0.181004  | 0.226081     | 0.018621969 |
| 4          | rs6551722     | 0.284173  | 0.334867     | 0.018632004 |
| 5          | rs12514247    | 0.208633  | 0.168767     | 0.018632004 |
| 2          | rs2571614     | 0.406475  | 0.35507      | 0.018642045 |
| 14         | rs1951462     | 0.317204  | 0.269231     | 0.018642045 |
| 12         | rs7304889     | 0.521505  | 0.467813     | 0.018652091 |
| 6          | rs161062      | 0.297491  | 0.348004     | 0.018662143 |
| 5          | rs2935624     | 0.519713  | 0.466599     | 0.018672201 |
| 5          | rs1835098     | 0.224014  | 0.272029     | 0.018672201 |
| 11         | rs1540157     | 0.195341  | 0.155654     | 0.018672201 |
| 18         | rs2212980     | 0.206093  | 0.165645     | 0.018672201 |
| 3          | rs17233898    | 0.0985663 | 0.134275     | 0.018682264 |
| 5          | rs10512927    | 0.218638  | 0.177172     | 0.018682264 |
| 6          | rs9370422     | 0.46595   | 0.412807     | 0.018682264 |
| 5          | rs4336380     | 0.462366  | 0.40906      | 0.018692332 |
| 10         | rs11251744    | 0.349462  | 0.299387     | 0.018692332 |
| 12         | rs11051641    | 0.123656  | 0.163199     | 0.018692332 |

Table DS2: All SNPs tested for association (RDC SABP vs. controls) with the Cochran-Armitage trend test and significant at the p=0.05 threshold.

| chromosome | SNP           | MAF_cases | MAF_controls | p_value     |
|------------|---------------|-----------|--------------|-------------|
| 3          | rs11708786    | 0.149281  | 0.114441     | 0.018702407 |
| 9          | rs7862638     | 0.116487  | 0.0865417    | 0.018702407 |
| 11         | rs11220719    | 0.232975  | 0.280218     | 0.018702407 |
| 1          | rs2786967     | 0.390288  | 0.443515     | 0.018712486 |
| 16         | rs2656649     | 0.145683  | 0.110903     | 0.018712486 |
| 2          | rs4255987     | 0.382671  | 0.331687     | 0.018722572 |
| 2          | rs12464933    | 0.433692  | 0.487547     | 0.018722572 |
| 6          | rs13203299    | 0.159498  | 0.202385     | 0.018722572 |
| 8          | rs10216846    | 0.467742  | 0.414368     | 0.018722572 |
| 12         | rs1558905     | 0.182796  | 0.144853     | 0.018722572 |
| 2          | rs6718868     | 0.0935252 | 0.129131     | 0.018732663 |
| 2          | rs2018302     | 0.161871  | 0.205482     | 0.01874276  |
| 2          | rs12694580    | 0.103943  | 0.140742     | 0.01874276  |
| 5          | rs3798128     | 0.415162  | 0.468227     | 0.01874276  |
| 2          | rs4669044     | 0.299283  | 0.25247      | 0.018752862 |
| 2          | rs4952359     | 0.40681   | 0.355465     | 0.018752862 |
| 9          | rs512623      | 0.345878  | 0.398296     | 0.018752862 |
| 6          | rs9453912     | 0.367384  | 0.317098     | 0.01876297  |
| 7          | rs4948173     | 0.159498  | 0.202592     | 0.01876297  |
| 2          | rs6747985     | 0.154122  | 0.119202     | 0.018773084 |
| 4          | rs12646209    | 0.23741   | 0.194274     | 0.018773084 |
| 5          | rs11954404    | 0.210432  | 0.170017     | 0.018773084 |
| 9          | SNP_A-2210895 | 0.352518  | 0.302421     | 0.018773084 |
| 9          | rs17371809    | 0.0752688 | 0.0512602    | 0.018773084 |
| 13         | rs1022897     | 0.336918  | 0.287662     | 0.018793328 |
| 5          | rs2973868     | 0.456835  | 0.404299     | 0.018803458 |
| 6          | rs9482859     | 0.222222  | 0.180797     | 0.018803458 |
| 11         | rs2299628     | 0.428058  | 0.376065     | 0.018803458 |
| 11         | rs7943389     | 0.129032  | 0.168484     | 0.018803458 |
| 6          | rs6913825     | 0.541516  | 0.488416     | 0.018813595 |
| 14         | rs17110072    | 0.0896057 | 0.0630324    | 0.018813595 |
| 17         | rs8065563     | 0.426523  | 0.373978     | 0.018813595 |
| 17         | rs4925129     | 0.426523  | 0.373978     | 0.018813595 |
| 18         | rs1869724     | 0.246403  | 0.203173     | 0.018813595 |
| 3          | rs1500420     | 0.317204  | 0.369372     | 0.018823736 |
| 11         | rs1450208     | 0.0681004 | 0.1          | 0.018823736 |
| 11         | rs10891248    | 0.420863  | 0.369469     | 0.018823736 |
| 12         | rs3925064     | 0.236559  | 0.284814     | 0.018823736 |
| 12         | rs2293515     | 0.241007  | 0.289608     | 0.018823736 |
| 15         | rs169345      | 0.350719  | 0.30133      | 0.018823736 |
| 4          | rs159864      | 0.0985663 | 0.0711361    | 0.018833884 |
| 13         | rs874266      | 0.0341727 | 0.0591746    | 0.018833884 |
| 8          | rs16898244    | 0.18638   | 0.231005     | 0.018844037 |
| 19         | rs1533675     | 0.27957   | 0.233833     | 0.018844037 |
| 9          | rs4978914     | 0.116487  | 0.0865188    | 0.018854196 |
| 14         | rs978956      | 0.062724  | 0.0938032    | 0.018854196 |
| 20         | rs2903094     | 0.247312  | 0.20453      | 0.01886436  |
| 3          | rs17043569    | 0.0842294 | 0.118018     | 0.01887453  |
| 14         | rs4398038     | 0.318345  | 0.270427     | 0.01887453  |
| 16         | rs247062      | 0.340502  | 0.392137     | 0.01887453  |
| 21         | rs1014840     | 0.390681  | 0.339298     | 0.01887453  |
| 6          | rs802288      | 0.103943  | 0.141008     | 0.018884706 |

Table DS2: All SNPs tested for association (RDC SABP vs. controls) with the Cochran-Armitage trend test and significant at the p=0.05 threshold.

| chromosome | SNP           | MAF_cases | MAF_controls | p_value     |
|------------|---------------|-----------|--------------|-------------|
| 4          | rs2070951     | 0.440647  | 0.494208     | 0.018894888 |
| 5          | rs1345731     | 0.16426   | 0.128323     | 0.018894888 |
| 9          | rs1927902     | 0.216846  | 0.263974     | 0.018894888 |
| 16         | rs12927445    | 0.412186  | 0.360572     | 0.018894888 |
| 20         | rs3787146     | 0.32852   | 0.380839     | 0.018894888 |
| 1          | rs656801      | 0.102151  | 0.138501     | 0.018905075 |
| 3          | rs12715571    | 0.161871  | 0.205381     | 0.018905075 |
| 18         | rs9965312     | 0.293165  | 0.24778      | 0.018905075 |
| 1          | rs1414073     | 0.179856  | 0.224685     | 0.018925466 |
| 7          | rs10215935    | 0.358423  | 0.308478     | 0.018925466 |
| 10         | rs7919547     | 0.476703  | 0.423706     | 0.018925466 |
| 18         | rs12960691    | 0.523381  | 0.468995     | 0.018925466 |
| 9          | rs10733366    | 0.078853  | 0.0543071    | 0.01893567  |
| 11         | rs11023934    | 0.182796  | 0.227505     | 0.01893567  |
| 12         | rs1275619     | 0.261649  | 0.310861     | 0.01893567  |
| 1          | rs1925958     | 0.327338  | 0.27863      | 0.01894588  |
| 3          | rs17368986    | 0.246403  | 0.202624     | 0.01894588  |
| 5          | rs4703535     | 0.435252  | 0.382573     | 0.01894588  |
| 11         | rs4641448     | 0.276978  | 0.326917     | 0.01894588  |
| 15         | rs4777788     | 0.268953  | 0.22385      | 0.01894588  |
| 1          | rs4661553     | 0.180505  | 0.14198      | 0.018956095 |
| 2          | rs6711185     | 0.208633  | 0.167802     | 0.018956095 |
| 4          | rs17400392    | 0.18638   | 0.14751      | 0.018956095 |
| 3          | rs3755713     | 0.351254  | 0.302009     | 0.018966316 |
| 4          | rs7693546     | 0.0827338 | 0.0572597    | 0.018966316 |
| 5          | rs1654209     | 0.0881295 | 0.0619877    | 0.018966316 |
| 6          | rs7751588     | 0.172043  | 0.134707     | 0.018966316 |
| 4          | SNP_A-1851302 | 0.413978  | 0.362521     | 0.018976543 |
| 14         | rs11621622    | 0.376344  | 0.326065     | 0.018976543 |
| 22         | rs4303814     | 0.397112  | 0.450461     | 0.018986776 |
| 2          | rs1125184     | 0.155914  | 0.198332     | 0.018997014 |
| 4          | rs12498151    | 0.329749  | 0.381642     | 0.018997014 |
| 6          | rs3806113     | 0.310036  | 0.262853     | 0.018997014 |
| 6          | rs12214856    | 0.344086  | 0.294859     | 0.018997014 |
| 11         | rs2291840     | 0.202509  | 0.162573     | 0.018997014 |
| 13         | rs1022239     | 0.464158  | 0.410733     | 0.018997014 |
| 2          | rs10178618    | 0.358423  | 0.411134     | 0.019007258 |
| 5          | rs16890269    | 0.0501792 | 0.0785082    | 0.019007258 |
| 7          | rs12538858    | 0.358423  | 0.308598     | 0.019007258 |
| 8          | rs10112627    | 0.0647482 | 0.0954654    | 0.019007258 |
| 11         | rs16911616    | 0.0881295 | 0.0618169    | 0.019007258 |
| 13         | rs7328295     | 0.257194  | 0.306474     | 0.019007258 |
| 20         | rs6090583     | 0.419355  | 0.472241     | 0.019007258 |
| 13         | rs9316184     | 0.198925  | 0.244463     | 0.019017508 |
| 19         | rs2650781     | 0.246403  | 0.202763     | 0.019017508 |
| 1          | rs3767001     | 0.109319  | 0.146778     | 0.019027763 |
| 4          | rs2969174     | 0.338129  | 0.289097     | 0.019027763 |
| 4          | rs1461595     | 0.0824373 | 0.115764     | 0.019027763 |
| 8          | rs16933666    | 0.0752688 | 0.0514305    | 0.019027763 |
| 15         | rs2249312     | 0.362816  | 0.415049     | 0.019027763 |
| 16         | rs3844608     | 0.398917  | 0.4523       | 0.019027763 |
| 12         | rs7971161     | 0.508961  | 0.455907     | 0.019038024 |

Table DS2: All SNPs tested for association (RDC SABP vs. controls) with the Cochran-Armitage trend test and significant at the p=0.05 threshold.

| chromosome | SNP           | MAF_cases | MAF_controls | p_value     |
|------------|---------------|-----------|--------------|-------------|
| 4          | rs10025560    | 0.107527  | 0.144486     | 0.019048291 |
| 17         | rs7224969     | 0.0770609 | 0.0529372    | 0.019048291 |
| 2          | rs11125011    | 0.305054  | 0.35629      | 0.019058564 |
| 2          | rs1898291     | 0.104317  | 0.141056     | 0.019058564 |
| 4          | rs17037125    | 0.0985663 | 0.0708447    | 0.019068842 |
| 8          | rs16875901    | 0.0842294 | 0.118529     | 0.019068842 |
| 7          | rs4723331     | 0.120504  | 0.158641     | 0.019079126 |
| 20         | rs6071592     | 0.0860215 | 0.121114     | 0.019079126 |
| 8          | rs1487152     | 0.442652  | 0.496076     | 0.019089416 |
| 9          | rs7023244     | 0.19964   | 0.245148     | 0.019089416 |
| 9          | rs6475326     | 0.46223   | 0.409261     | 0.019089416 |
| 11         | rs665097      | 0.372302  | 0.321587     | 0.019089416 |
| 4          | rs17062314    | 0.0899281 | 0.124488     | 0.019099711 |
| 5          | rs1368356     | 0.349462  | 0.401977     | 0.019110013 |
| 6          | rs10946739    | 0.347122  | 0.399522     | 0.019110013 |
| 9          | rs943935      | 0.181004  | 0.142711     | 0.019110013 |
| 20         | rs3787348     | 0.501805  | 0.447988     | 0.019110013 |
| 2          | rs334160      | 0.227437  | 0.185393     | 0.01912032  |
| 3          | rs1403076     | 0.162455  | 0.205049     | 0.01912032  |
| 2          | rs818185      | 0.330935  | 0.381992     | 0.019130632 |
| 3          | rs718634      | 0.544964  | 0.4913       | 0.019130632 |
| 5          | rs249729      | 0.202509  | 0.162747     | 0.019130632 |
| 18         | rs383624      | 0.370036  | 0.422487     | 0.019130632 |
| 7          | rs2525733     | 0.182796  | 0.22718      | 0.019140951 |
| 9          | rs10118506    | 0.216846  | 0.263794     | 0.019140951 |
| 9          | rs7036316     | 0.216846  | 0.263794     | 0.019140951 |
| 11         | rs11020703    | 0.463768  | 0.411233     | 0.019140951 |
| 18         | rs611263      | 0.242806  | 0.200068     | 0.019140951 |
| 3          | rs6763181     | 0.428058  | 0.482277     | 0.019151275 |
| 21         | rs1735989     | 0.218412  | 0.177062     | 0.019151275 |
| 2          | rs17649894    | 0.0878136 | 0.122317     | 0.019161605 |
| 10         | rs10884461    | 0.260791  | 0.309898     | 0.019171941 |
| 12         | rs12424188    | 0.0878136 | 0.0617978    | 0.019171941 |
| 14         | rs12880596    | 0.394265  | 0.447189     | 0.019171941 |
| 16         | rs10521275    | 0.440647  | 0.494382     | 0.019171941 |
| 20         | rs6029378     | 0.40681   | 0.459312     | 0.019171941 |
| 1          | rs1009941     | 0.456835  | 0.404429     | 0.019182282 |
| 2          | rs340732      | 0.172043  | 0.135264     | 0.019182282 |
| 3          | rs1385194     | 0.0896057 | 0.0629263    | 0.019182282 |
| 4          | rs7693170     | 0.286738  | 0.240184     | 0.019182282 |
| 4          | rs2070950     | 0.44086   | 0.494206     | 0.019182282 |
| 7          | rs6970481     | 0.125899  | 0.165361     | 0.019182282 |
| 7          | rs4719344     | 0.166667  | 0.210123     | 0.019182282 |
| 12         | rs11053580    | 0.152878  | 0.117507     | 0.019182282 |
| 2          | rs7425883     | 0.268953  | 0.223944     | 0.019192629 |
| 7          | SNP_A-4286663 | 0.0842294 | 0.0587935    | 0.019192629 |
| 10         | rs10885239    | 0.202509  | 0.248466     | 0.019192629 |
| 13         | rs7994077     | 0.345878  | 0.398603     | 0.019192629 |
| 2          | rs1039766     | 0.116487  | 0.15475      | 0.019202982 |
| 18         | rs470497      | 0.363799  | 0.416695     | 0.019202982 |
| 1          | rs10779417    | 0.37276   | 0.424966     | 0.019213341 |
| 8          | rs10957640    | 0.350181  | 0.301363     | 0.019234076 |

Table DS2: All SNPs tested for association (RDC SABP vs. controls) with the Cochran-Armitage trend test and significant at the p=0.05 threshold.

| chromosome | SNP           | MAF_cases | MAF_controls | p_value     |
|------------|---------------|-----------|--------------|-------------|
| 13         | rs1571625     | 0.121864  | 0.0908316    | 0.019254834 |
| 2          | rs17815112    | 0.412186  | 0.465781     | 0.019265222 |
| 4          | rs955185      | 0.38172   | 0.434664     | 0.019265222 |
| 19         | SNP_A-1927977 | 0.111111  | 0.149404     | 0.019265222 |
| 1          | rs11118329    | 0.388889  | 0.337649     | 0.019275615 |
| 11         | rs2570310     | 0.347122  | 0.39925      | 0.019275615 |
| 10         | rs7907569     | 0.424731  | 0.373213     | 0.01929642  |
| 13         | rs7997299     | 0.358423  | 0.308728     | 0.01929642  |
| 14         | rs10134939    | 0.317204  | 0.269493     | 0.01929642  |
| 2          | rs13027490    | 0.508961  | 0.455198     | 0.019306831 |
| 2          | rs801340      | 0.0863309 | 0.120654     | 0.019306831 |
| 12         | rs7967900     | 0.204301  | 0.163887     | 0.019306831 |
| 2          | rs17010098    | 0.0395683 | 0.0653807    | 0.019317247 |
| 5          | rs2962587     | 0.306859  | 0.358433     | 0.019317247 |
| 6          | rs9378593     | 0.102151  | 0.0740804    | 0.019317247 |
| 10         | rs11002535    | 0.241935  | 0.19891      | 0.019317247 |
| 4          | rs2412522     | 0.275986  | 0.325894     | 0.01932767  |
| 12         | rs10878103    | 0.261649  | 0.21728      | 0.01932767  |
| 4          | rs1567567     | 0.284946  | 0.335264     | 0.019348532 |
| 7          | rs1476623     | 0.482079  | 0.43013      | 0.019348532 |
| 10         | rs11008213    | 0.223022  | 0.181431     | 0.019348532 |
| 20         | rs6129503     | 0.121864  | 0.0905995    | 0.019348532 |
| 4          | rs335070      | 0.422939  | 0.371039     | 0.019358972 |
| 11         | rs11040465    | 0.397849  | 0.450579     | 0.019358972 |
| 14         | rs8018800     | 0.374552  | 0.324582     | 0.019358972 |
| 2          | rs1020677     | 0.28777   | 0.337819     | 0.019369418 |
| 4          | rs1553047     | 0.362007  | 0.414988     | 0.019369418 |
| 8          | rs2702887     | 0.135379  | 0.175657     | 0.019369418 |
| 12         | rs3217906     | 0.30036   | 0.253324     | 0.019369418 |
| 5          | rs1393174     | 0.421147  | 0.473586     | 0.019379869 |
| 5          | rs248774      | 0.433453  | 0.382122     | 0.019379869 |
| 22         | rs11089574    | 0.284946  | 0.239612     | 0.019379869 |
| 7          | rs10225341    | 0.354839  | 0.305593     | 0.019390327 |
| 11         | rs11222166    | 0.21147   | 0.17117      | 0.019390327 |
| 16         | rs11640993    | 0.352518  | 0.404908     | 0.019390327 |
| 9          | rs1983753     | 0.190647  | 0.15184      | 0.01940079  |
| 14         | rs11847326    | 0.0985663 | 0.134366     | 0.01940079  |
| 3          | rs1453744     | 0.197133  | 0.158146     | 0.019411259 |
| 3          | rs1379623     | 0.42446   | 0.373127     | 0.019411259 |
| 8          | rs10081429    | 0.320789  | 0.273347     | 0.019411259 |
| 19         | rs416231      | 0.204301  | 0.164337     | 0.019432215 |
| 1          | rs12130868    | 0.34767   | 0.298228     | 0.019442702 |
| 4          | rs260932      | 0.448029  | 0.395848     | 0.019453194 |
| 5          | rs11952681    | 0.0322581 | 0.0567291    | 0.019453194 |
| 8          | rs7008249     | 0.129496  | 0.169336     | 0.019453194 |
| 10         | rs11003226    | 0.268817  | 0.31795      | 0.019453194 |
| 3          | rs11709034    | 0.428058  | 0.481759     | 0.019463692 |
| 21         | rs464519      | 0.311151  | 0.264535     | 0.019463692 |
| 1          | rs7556242     | 0.155914  | 0.198502     | 0.019474197 |
| 13         | rs2803209     | 0.146953  | 0.112363     | 0.019474197 |
| 8          | rs6472656     | 0.252688  | 0.209441     | 0.019484707 |
| 8          | rs7830840     | 0.191756  | 0.23712      | 0.019484707 |

Table DS2: All SNPs tested for association (RDC SABP vs. controls) with the Cochran-Armitage trend test and significant at the p=0.05 threshold.

| chromosome | SNP           | MAF_cases | MAF_controls | p_value     |
|------------|---------------|-----------|--------------|-------------|
| 11         | rs11023685    | 0.301075  | 0.25435      | 0.019484707 |
| 2          | rs12989756    | 0.0773381 | 0.110279     | 0.019495222 |
| 20         | rs6064700     | 0.363799  | 0.314802     | 0.019505744 |
| 10         | rs515910      | 0.356631  | 0.409277     | 0.019516272 |
| 12         | rs4913307     | 0.362007  | 0.312074     | 0.019516272 |
| 5          | rs881236      | 0.464029  | 0.411513     | 0.019526805 |
| 10         | rs10824826    | 0.268817  | 0.317934     | 0.019526805 |
| 6          | rs200827      | 0.417266  | 0.365928     | 0.019537345 |
| 9          | rs774354      | 0.241935  | 0.289823     | 0.019537345 |
| 4          | rs4692351     | 0.410394  | 0.359332     | 0.01954789  |
| 10         | rs12268030    | 0.28777   | 0.242337     | 0.01954789  |
| 14         | rs8022542     | 0.314748  | 0.36653      | 0.01954789  |
| 21         | rs2826951     | 0.446237  | 0.394208     | 0.01954789  |
| 1          | rs12048846    | 0.329749  | 0.381139     | 0.019558441 |
| 3          | rs17038558    | 0.102151  | 0.138084     | 0.019558441 |
| 3          | rs1464790     | 0.360215  | 0.310926     | 0.019558441 |
| 9          | rs7858424     | 0.272401  | 0.321745     | 0.019558441 |
| 16         | rs16964529    | 0.263441  | 0.312372     | 0.019558441 |
| 2          | rs1641143     | 0.426523  | 0.480566     | 0.019568998 |
| 10         | rs2182965     | 0.145161  | 0.185904     | 0.019568998 |
| 12         | rs7314055     | 0.332734  | 0.284421     | 0.019568998 |
| 16         | rs274079      | 0.204301  | 0.251107     | 0.019568998 |
| 18         | rs1444072     | 0.147482  | 0.113551     | 0.019579561 |
| 19         | rs733102      | 0.109712  | 0.0805792    | 0.019579561 |
| 1          | rs1146303     | 0.31362   | 0.364828     | 0.01959013  |
| 5          | rs2015911     | 0.340502  | 0.292093     | 0.01959013  |
| 6          | rs2815743     | 0.53405   | 0.481216     | 0.01959013  |
| 17         | rs4426402     | 0.362816  | 0.31267      | 0.01959013  |
| 3          | rs6795389     | 0.368705  | 0.319018     | 0.019600705 |
| 12         | rs12308338    | 0.109712  | 0.146888     | 0.019600705 |
| 14         | SNP_A-1815467 | 0.229391  | 0.187607     | 0.019600705 |
| 15         | rs582122      | 0.516129  | 0.46302      | 0.019600705 |
| 4          | rs6823673     | 0.310036  | 0.262343     | 0.019611285 |
| 10         | rs3107450     | 0.34296   | 0.293556     | 0.019611285 |
| 10         | rs11595793    | 0.379928  | 0.432663     | 0.019611285 |
| 13         | rs9531958     | 0.376344  | 0.429496     | 0.019611285 |
| 15         | rs1357370     | 0.437276  | 0.385154     | 0.019611285 |
| 4          | rs4861041     | 0.175627  | 0.138747     | 0.019621872 |
| 17         | rs2531853     | 0.40681   | 0.460334     | 0.019621872 |
| 5          | rs2526152     | 0.426523  | 0.374915     | 0.019632464 |
| 7          | rs4726441     | 0.290323  | 0.339918     | 0.019632464 |
| 13         | rs723436      | 0.302158  | 0.352439     | 0.019632464 |
| 3          | rs2240920     | 0.286738  | 0.336571     | 0.019643063 |
| 5          | rs17384294    | 0.387097  | 0.337138     | 0.019643063 |
| 6          | rs9405149     | 0.0555556 | 0.0847544    | 0.019643063 |
| 6          | rs2071286     | 0.147482  | 0.189162     | 0.019643063 |
| 6          | rs2057518     | 0.247312  | 0.203678     | 0.019643063 |
| 20         | rs1238200     | 0.136691  | 0.103812     | 0.019643063 |
| 3          | rs7431389     | 0.184588  | 0.228557     | 0.019653667 |
| 6          | rs7743622     | 0.476619  | 0.424361     | 0.019653667 |
| 9          | rs17214837    | 0.0286738 | 0.0519303    | 0.019653667 |
| 18         | rs4324212     | 0.179211  | 0.223433     | 0.019653667 |

Table DS2: All SNPs tested for association (RDC SABP vs. controls) with the Cochran-Armitage trend test and significant at the p=0.05 threshold.

| chromosome | SNP        | MAF_cases | MAF_controls | p_value     |
|------------|------------|-----------|--------------|-------------|
| 6          | rs12528912 | 0.415771  | 0.364658     | 0.019664277 |
| 7          | rs7791324  | 0.371841  | 0.424795     | 0.019664277 |
| 8          | rs6982592  | 0.177419  | 0.1403       | 0.019664277 |
| 12         | rs881613   | 0.33871   | 0.289751     | 0.019664277 |
| 12         | rs10444533 | 0.275986  | 0.230494     | 0.019664277 |
| 5          | rs13163457 | 0.433692  | 0.382584     | 0.019674893 |
| 18         | rs7243624  | 0.329749  | 0.281431     | 0.019674893 |
| 1          | rs7556116  | 0.132246  | 0.172014     | 0.019685515 |
| 5          | rs7446869  | 0.0322581 | 0.0566712    | 0.019685515 |
| 7          | rs2471214  | 0.448029  | 0.500853     | 0.019685515 |
| 10         | rs3862129  | 0.208633  | 0.168712     | 0.019685515 |
| 12         | rs17512574 | 0.201439  | 0.161323     | 0.019685515 |
| 16         | rs1875207  | 0.290323  | 0.341235     | 0.019685515 |
| 7          | rs6465748  | 0.195341  | 0.156271     | 0.019696143 |
| 8          | rs4145821  | 0.31362   | 0.266519     | 0.019706777 |
| 16         | rs8063761  | 0.295699  | 0.346469     | 0.019706777 |
| 20         | rs2179604  | 0.0561594 | 0.0853202    | 0.019706777 |
| 2          | rs10498223 | 0.435484  | 0.48876      | 0.019717417 |
| 15         | rs1200349  | 0.43705   | 0.490634     | 0.019717417 |
| 20         | rs2247963  | 0.240143  | 0.28744      | 0.019717417 |
| 14         | rs4519265  | 0.236559  | 0.28406      | 0.019728063 |
| 4          | rs4835033  | 0.172043  | 0.21599      | 0.019738715 |
| 7          | rs13243874 | 0.374552  | 0.324923     | 0.019738715 |
| 12         | rs4930919  | 0.311828  | 0.264646     | 0.019738715 |
| 3          | rs17033961 | 0.320789  | 0.272324     | 0.019749372 |
| 4          | rs7690600  | 0.223022  | 0.270201     | 0.019749372 |
| 14         | rs3813402  | 0.283154  | 0.333163     | 0.019749372 |
| 13         | rs9526841  | 0.258065  | 0.306303     | 0.019760036 |
| 2          | rs12052409 | 0.0770609 | 0.0529993    | 0.019770705 |
| 2          | rs4416163  | 0.265233  | 0.314159     | 0.019770705 |
| 5          | rs7703318  | 0.408273  | 0.461683     | 0.019770705 |
| 10         | rs1415880  | 0.250903  | 0.207566     | 0.019770705 |
| 16         | rs12597733 | 0.223022  | 0.181942     | 0.019770705 |
| 1          | rs7546709  | 0.406475  | 0.355317     | 0.019781381 |
| 2          | rs9789490  | 0.170251  | 0.134017     | 0.019781381 |
| 6          | rs10498774 | 0.265233  | 0.221069     | 0.019781381 |
| 7          | rs819436   | 0.379061  | 0.43216      | 0.019781381 |
| 9          | rs2418198  | 0.260791  | 0.216451     | 0.019781381 |
| 13         | rs9534843  | 0.412186  | 0.465711     | 0.019781381 |
| 15         | rs1399077  | 0.304659  | 0.258103     | 0.019781381 |
| 2          | rs17048253 | 0.204301  | 0.164622     | 0.019792062 |
| 4          | rs300915   | 0.412186  | 0.360619     | 0.019792062 |
| 17         | rs9909477  | 0.0359712 | 0.0608592    | 0.019792062 |
| 1          | rs235905   | 0.226619  | 0.18509      | 0.01980275  |
| 10         | rs1891789  | 0.532258  | 0.478727     | 0.01980275  |
| 1          | rs2185196  | 0.403226  | 0.35263      | 0.019813443 |
| 4          | rs4862411  | 0.183453  | 0.228387     | 0.019813443 |
| 5          | rs1428048  | 0.297491  | 0.347922     | 0.019813443 |
| 8          | rs4545066  | 0.154122  | 0.119299     | 0.019813443 |
| 8          | rs1156154  | 0.483871  | 0.431733     | 0.019824143 |
| 11         | rs2082544  | 0.229391  | 0.276907     | 0.019824143 |
| 18         | rs526989   | 0.532258  | 0.479216     | 0.019824143 |



Table DS2: All SNPs tested for association (RDC SABP vs. controls) with the Cochran-Armitage trend test and significant at the p=0.05 threshold.

| chromosome | SNP        | MAF_cases | MAF_controls | p_value     |
|------------|------------|-----------|--------------|-------------|
| 6          | rs6937607  | 0.188172  | 0.149983     | 0.019834848 |
| 10         | rs3982199  | 0.155914  | 0.197991     | 0.019834848 |
| 10         | rs4644590  | 0.363799  | 0.314973     | 0.019834848 |
| 16         | rs8051496  | 0.140288  | 0.180858     | 0.019834848 |
| 17         | rs9896969  | 0.215054  | 0.261352     | 0.019834848 |
| 15         | rs4886931  | 0.0755396 | 0.051636     | 0.019845559 |
| 20         | rs6039215  | 0.322581  | 0.37419      | 0.019845559 |
| 11         | rs2741771  | 0.435484  | 0.489101     | 0.019856277 |
| 17         | rs9912895  | 0.42446   | 0.372311     | 0.019856277 |
| 2          | rs17024849 | 0.17509   | 0.137743     | 0.019867    |
| 4          | rs17775309 | 0.311151  | 0.36131      | 0.019867    |
| 7          | rs17288345 | 0.157706  | 0.19983      | 0.019867    |
| 8          | rs17481221 | 0.148746  | 0.115123     | 0.019867    |
| 11         | rs10500963 | 0.231047  | 0.278289     | 0.019867    |
| 11         | rs1829     | 0.179211  | 0.223433     | 0.019867    |
| 20         | rs8124740  | 0.116487  | 0.0864828    | 0.019867    |
| 5          | rs1529688  | 0.158845  | 0.123849     | 0.019877729 |
| 17         | rs2305923  | 0.336918  | 0.28856      | 0.019877729 |
| 1          | rs7539860  | 0.353047  | 0.405111     | 0.019888464 |
| 11         | rs670627   | 0.155914  | 0.197924     | 0.019899206 |
| 13         | rs7985623  | 0.274194  | 0.32384      | 0.019899206 |
| 2          | rs478793   | 0.413357  | 0.466122     | 0.019909953 |
| 22         | rs5765377  | 0.127698  | 0.166723     | 0.019909953 |
| 5          | rs248772   | 0.433692  | 0.382624     | 0.019920706 |
| 20         | rs1923113  | 0.240143  | 0.287368     | 0.019920706 |
| 1          | rs3753745  | 0.109712  | 0.147119     | 0.019931466 |
| 2          | rs12991182 | 0.109319  | 0.146728     | 0.019942231 |
| 5          | rs159971   | 0.224014  | 0.18188      | 0.019942231 |
| 4          | rs1013028  | 0.284946  | 0.335094     | 0.019953002 |
| 15         | rs2930848  | 0.146953  | 0.187905     | 0.019953002 |
| 16         | rs12448813 | 0.543011  | 0.490126     | 0.019953002 |
| 20         | rs154873   | 0.311828  | 0.361793     | 0.019953002 |
| 22         | rs17003912 | 0.150538  | 0.116315     | 0.019953002 |
| 1          | rs1604137  | 0.424731  | 0.372743     | 0.01996378  |
| 9          | rs1927900  | 0.215827  | 0.262385     | 0.01996378  |
| 1          | rs10779279 | 0.112903  | 0.0831063    | 0.019974563 |
| 5          | rs2861946  | 0.469534  | 0.417291     | 0.019974563 |
| 11         | rs453838   | 0.315412  | 0.366951     | 0.019974563 |
| 1          | rs311441   | 0.11828   | 0.156783     | 0.019985352 |
| 2          | rs13428571 | 0.137993  | 0.178705     | 0.019985352 |
| 11         | rs4753717  | 0.143369  | 0.184175     | 0.019985352 |
| 12         | rs1045741  | 0.250896  | 0.207079     | 0.019985352 |
| 18         | rs2000841  | 0.107527  | 0.144293     | 0.019985352 |
| 2          | rs1641145  | 0.426259  | 0.480245     | 0.019996148 |
| 10         | rs1254964  | 0.354839  | 0.305963     | 0.019996148 |
| 4          | rs4696207  | 0.396057  | 0.448927     | 0.020006949 |
| 6          | rs802289   | 0.105735  | 0.142614     | 0.020006949 |
| 14         | rs3784004  | 0.231183  | 0.27861      | 0.020006949 |
| 1          | rs6682638  | 0.11828   | 0.0877433    | 0.020017757 |
| 2          | rs11687166 | 0.44086   | 0.494033     | 0.020017757 |
| 5          | rs10516030 | 0.112903  | 0.150375     | 0.020017757 |
| 7          | rs10081247 | 0.311828  | 0.362785     | 0.020017757 |

Table DS2: All SNPs tested for association (RDC SABP vs. controls) with the Cochran-Armitage trend test and significant at the p=0.05 threshold.

| chromosome | SNP           | MAF_cases | MAF_controls | p_value     |
|------------|---------------|-----------|--------------|-------------|
| 11         | rs4752791     | 0.105735  | 0.142152     | 0.020017757 |
| 11         | rs3914694     | 0.0866426 | 0.061113     | 0.020017757 |
| 11         | rs17740690    | 0.0913978 | 0.0643514    | 0.020017757 |
| 2          | rs10168212    | 0.331541  | 0.382413     | 0.02002857  |
| 5          | rs13180334    | 0.375899  | 0.325383     | 0.02002857  |
| 2          | rs4952361     | 0.406475  | 0.355559     | 0.02003939  |
| 5          | rs13184546    | 0.264388  | 0.219155     | 0.02003939  |
| 8          | rs6651353     | 0.103943  | 0.0754685    | 0.02003939  |
| 13         | rs9540226     | 0.134892  | 0.174328     | 0.02003939  |
| 3          | rs9637536     | 0.18705   | 0.148722     | 0.020050215 |
| 13         | rs2478327     | 0.482079  | 0.428985     | 0.020050215 |
| 11         | rs6485872     | 0.336331  | 0.387828     | 0.020061047 |
| 9          | rs7047242     | 0.298561  | 0.348655     | 0.020071884 |
| 14         | rs17127912    | 0.177419  | 0.221295     | 0.020082728 |
| 3          | SNP_A-2232449 | 0.27957   | 0.329472     | 0.020093578 |
| 15         | rs2414382     | 0.413669  | 0.466655     | 0.020093578 |
| 3          | rs4927941     | 0.0734767 | 0.105514     | 0.020104434 |
| 9          | rs7849813     | 0.215054  | 0.174684     | 0.020115296 |
| 14         | rs10144991    | 0.362007  | 0.413717     | 0.020115296 |
| 1          | rs7367532     | 0.157706  | 0.122275     | 0.020126164 |
| 5          | rs958582      | 0.306452  | 0.357508     | 0.020126164 |
| 5          | rs9312746     | 0.229391  | 0.27632      | 0.020126164 |
| 6          | rs2039560     | 0.516129  | 0.46319      | 0.020126164 |
| 5          | rs1363933     | 0.102151  | 0.0740804    | 0.020137038 |
| 13         | rs3910574     | 0.399642  | 0.349182     | 0.020137038 |
| 11         | rs4755447     | 0.259857  | 0.215696     | 0.020147918 |
| 19         | rs1390754     | 0.438849  | 0.387355     | 0.020147918 |
| 5          | rs295699      | 0.416968  | 0.365608     | 0.020158804 |
| 5          | rs11949065    | 0.21147   | 0.171433     | 0.020158804 |
| 11         | rs11214463    | 0.0949821 | 0.130628     | 0.020158804 |
| 1          | rs11118858    | 0.241935  | 0.199385     | 0.020169696 |
| 2          | rs11678782    | 0.265233  | 0.313585     | 0.020169696 |
| 5          | rs10051002    | 0.273381  | 0.228016     | 0.020169696 |
| 5          | rs36701       | 0.197133  | 0.243174     | 0.020169696 |
| 5          | rs17229259    | 0.223022  | 0.182112     | 0.020169696 |
| 11         | rs675450      | 0.336918  | 0.388113     | 0.020169696 |
| 14         | rs10150578    | 0.420863  | 0.369809     | 0.020169696 |
| 15         | rs8024206     | 0.143885  | 0.184453     | 0.020169696 |
| 1          | rs12563027    | 0.111111  | 0.14811      | 0.020180595 |
| 2          | rs11096686    | 0.172662  | 0.136426     | 0.020180595 |
| 2          | rs1396134     | 0.40681   | 0.356048     | 0.020180595 |
| 10         | rs556292      | 0.356631  | 0.408998     | 0.020180595 |
| 1          | rs7516645     | 0.437276  | 0.490466     | 0.020191499 |
| 5          | rs4868265     | 0.250896  | 0.208135     | 0.020191499 |
| 12         | rs2171392     | 0.155914  | 0.198126     | 0.020191499 |
| 1          | rs10799612    | 0.224014  | 0.270713     | 0.02020241  |
| 3          | rs17181547    | 0.163082  | 0.205993     | 0.02020241  |
| 6          | rs4246081     | 0.246403  | 0.203988     | 0.020213327 |
| 1          | rs6663717     | 0.421147  | 0.473962     | 0.020224249 |
| 12         | rs17440942    | 0.204301  | 0.164169     | 0.020224249 |
| 9          | rs11793279    | 0.435484  | 0.488416     | 0.020235178 |
| 12         | rs11612882    | 0.311828  | 0.265066     | 0.020235178 |

Table DS2: All SNPs tested for association (RDC SABP vs. controls) with the Cochran-Armitage trend test and significant at the p=0.05 threshold.

| chromosome | SNP        | MAF_cases | MAF_controls | p_value     |
|------------|------------|-----------|--------------|-------------|
| 15         | rs2507373  | 0.362007  | 0.31201      | 0.020246113 |
| 10         | rs1259578  | 0.33935   | 0.391104     | 0.020257054 |
| 3          | rs17388505 | 0.235612  | 0.283475     | 0.020268002 |
| 16         | rs10492813 | 0.359712  | 0.412116     | 0.020268002 |
| 1          | rs546583   | 0.33871   | 0.389741     | 0.020278955 |
| 2          | rs7370999  | 0.353047  | 0.304192     | 0.020278955 |
| 3          | rs10513295 | 0.311828  | 0.265257     | 0.020278955 |
| 11         | rs371157   | 0.318345  | 0.369884     | 0.020278955 |
| 2          | rs1000919  | 0.0989209 | 0.135218     | 0.020289914 |
| 9          | rs10983772 | 0.216846  | 0.263292     | 0.020289914 |
| 4          | rs6843957  | 0.21147   | 0.171097     | 0.02030088  |
| 5          | rs1862523  | 0.263441  | 0.312841     | 0.02030088  |
| 5          | rs6580403  | 0.433692  | 0.382805     | 0.02030088  |
| 6          | rs17592421 | 0.453405  | 0.400953     | 0.02030088  |
| 6          | rs4498412  | 0.26259   | 0.311797     | 0.02030088  |
| 8          | rs17445916 | 0.235612  | 0.193697     | 0.02030088  |
| 17         | rs7215966  | 0.272401  | 0.321927     | 0.02030088  |
| 2          | rs6749325  | 0.311151  | 0.362334     | 0.020311852 |
| 7          | rs7780515  | 0.326165  | 0.377217     | 0.020311852 |
| 8          | rs3134389  | 0.0770609 | 0.0531516    | 0.020311852 |
| 16         | rs9939492  | 0.230216  | 0.278459     | 0.020311852 |
| 1          | rs3123736  | 0.227599  | 0.273968     | 0.02032283  |
| 3          | rs12695385 | 0.428315  | 0.481942     | 0.02032283  |
| 4          | rs7656442  | 0.47482   | 0.422684     | 0.02032283  |
| 5          | rs332042   | 0.430108  | 0.378788     | 0.02032283  |
| 8          | rs2941479  | 0.387097  | 0.439244     | 0.02032283  |
| 9          | rs888225   | 0.078853  | 0.111717     | 0.02032283  |
| 12         | rs1403091  | 0.0698925 | 0.101634     | 0.02032283  |
| 17         | rs4368210  | 0.355596  | 0.306314     | 0.02032283  |
| 18         | rs12150701 | 0.368705  | 0.31925      | 0.02032283  |
| 1          | rs16863860 | 0.062724  | 0.09294      | 0.020333814 |
| 3          | rs6770338  | 0.352518  | 0.404697     | 0.020333814 |
| 4          | rs6448067  | 0.405018  | 0.457907     | 0.020333814 |
| 4          | rs9307462  | 0.0896057 | 0.123977     | 0.020333814 |
| 5          | rs2102125  | 0.370968  | 0.321063     | 0.020333814 |
| 7          | rs6942609  | 0.170251  | 0.21324      | 0.020333814 |
| 18         | rs7229071  | 0.247312  | 0.204631     | 0.020333814 |
| 2          | rs1979038  | 0.132616  | 0.100375     | 0.020344804 |
| 11         | rs353589   | 0.133094  | 0.172854     | 0.020344804 |
| 15         | rs12438640 | 0.120072  | 0.0893769    | 0.0203558   |
| 7          | rs1706911  | 0.195341  | 0.157148     | 0.020366802 |
| 3          | rs1400286  | 0.073741  | 0.0500852    | 0.020377811 |
| 11         | rs1940026  | 0.078853  | 0.0545517    | 0.020377811 |
| 13         | rs9551419  | 0.195341  | 0.156739     | 0.020377811 |
| 13         | rs9316187  | 0.200717  | 0.245818     | 0.020377811 |
| 15         | rs8037251  | 0.284173  | 0.238291     | 0.020377811 |
| 1          | rs10922725 | 0.421147  | 0.473926     | 0.020388826 |
| 5          | rs3911209  | 0.306452  | 0.357654     | 0.020388826 |
| 8          | rs10087741 | 0.532374  | 0.479216     | 0.020388826 |
| 1          | rs1752189  | 0.243728  | 0.2015       | 0.020399847 |
| 10         | rs2247383  | 0.354839  | 0.407187     | 0.020399847 |
| 13         | rs17374863 | 0.129032  | 0.0974446    | 0.020399847 |

Table DS2: All SNPs tested for association (RDC SABP vs. controls) with the Cochran-Armitage trend test and significant at the p=0.05 threshold.

| chromosome | SNP        | MAF_cases | MAF_controls | p_value     |
|------------|------------|-----------|--------------|-------------|
| 6          | rs1997802  | 0.239209  | 0.196623     | 0.020410874 |
| 8          | rs2241896  | 0.324373  | 0.375        | 0.020410874 |
| 1          | rs3750300  | 0.11828   | 0.0877342    | 0.020421907 |
| 11         | rs1784975  | 0.320789  | 0.372275     | 0.020421907 |
| 14         | rs7142620  | 0.431655  | 0.484482     | 0.020421907 |
| 14         | rs10131741 | 0.206093  | 0.251362     | 0.020421907 |
| 14         | rs8007791  | 0.206093  | 0.251362     | 0.020421907 |
| 16         | rs6497421  | 0.145683  | 0.186542     | 0.020421907 |
| 1          | rs3790363  | 0.330935  | 0.283453     | 0.020432946 |
| 2          | rs10931294 | 0.378136  | 0.42986      | 0.020443992 |
| 12         | rs4761278  | 0.194946  | 0.156239     | 0.020443992 |
| 1          | rs2147599  | 0.43705   | 0.385009     | 0.020455043 |
| 1          | rs10482751 | 0.242806  | 0.291624     | 0.020455043 |
| 2          | rs10188763 | 0.38172   | 0.331631     | 0.020455043 |
| 3          | rs1471969  | 0.304659  | 0.258098     | 0.020455043 |
| 9          | rs7021909  | 0.31362   | 0.266951     | 0.020455043 |
| 1          | rs7512409  | 0.342294  | 0.394172     | 0.020466101 |
| 3          | rs7061     | 0.395683  | 0.448176     | 0.020466101 |
| 4          | rs2172339  | 0.537634  | 0.485354     | 0.020466101 |
| 6          | rs910536   | 0.322581  | 0.373638     | 0.020466101 |
| 8          | rs1293303  | 0.399281  | 0.451448     | 0.020466101 |
| 1          | rs499345   | 0.24552   | 0.292604     | 0.020477166 |
| 15         | rs12440759 | 0.244604  | 0.293356     | 0.020477166 |
| 20         | rs462145   | 0.326165  | 0.378374     | 0.020477166 |
| 4          | rs6537027  | 0.122744  | 0.1619       | 0.020488236 |
| 8          | rs964763   | 0.508961  | 0.455412     | 0.020488236 |
| 8          | rs11994633 | 0.207885  | 0.167973     | 0.020499312 |
| 10         | rs4933471  | 0.417563  | 0.36661      | 0.020499312 |
| 21         | rs2836631  | 0.444245  | 0.496925     | 0.020499312 |
| 7          | rs2103134  | 0.390288  | 0.44312      | 0.020510395 |
| 8          | rs17068294 | 0.0770609 | 0.109503     | 0.020510395 |
| 16         | rs7206844  | 0.100358  | 0.0723056    | 0.020510395 |
| 4          | rs1837711  | 0.517921  | 0.465247     | 0.020521484 |
| 4          | rs335069   | 0.422939  | 0.37155      | 0.020521484 |
| 5          | rs7727473  | 0.397849  | 0.450426     | 0.020521484 |
| 10         | rs7080061  | 0.315884  | 0.268338     | 0.020521484 |
| 3          | rs6444640  | 0.482014  | 0.429544     | 0.020532579 |
| 4          | rs10520376 | 0.134409  | 0.101805     | 0.020532579 |
| 16         | rs2194278  | 0.11828   | 0.156271     | 0.020532579 |
| 1          | rs414176   | 0.341727  | 0.393903     | 0.02054368  |
| 3          | rs6796318  | 0.0967742 | 0.132298     | 0.02054368  |
| 13         | rs1538050  | 0.243728  | 0.201671     | 0.02054368  |
| 15         | rs2241267  | 0.107914  | 0.0787589    | 0.02054368  |
| 19         | rs11672743 | 0.129496  | 0.169333     | 0.02054368  |
| 2          | rs4672695  | 0.265233  | 0.313799     | 0.020554788 |
| 2          | rs6718201  | 0.265233  | 0.313819     | 0.020565901 |
| 7          | rs4960618  | 0.0949821 | 0.0681818    | 0.020565901 |
| 10         | rs16909819 | 0.107527  | 0.143854     | 0.020565901 |
| 3          | rs9826051  | 0.114695  | 0.152404     | 0.020577021 |
| 1          | rs3118412  | 0.369176  | 0.319113     | 0.020588148 |
| 3          | rs9862576  | 0.464158  | 0.411304     | 0.020588148 |
| 8          | rs16873932 | 0.184588  | 0.146919     | 0.020588148 |

Table DS2: All SNPs tested for association (RDC SABP vs. controls) with the Cochran-Armitage trend test and significant at the p=0.05 threshold.

| chromosome | SNP        | MAF_cases | MAF_controls | p_value     |
|------------|------------|-----------|--------------|-------------|
| 1          | rs1417441  | 0.374101  | 0.324591     | 0.02059928  |
| 5          | rs9313108  | 0.25448   | 0.21127      | 0.02059928  |
| 12         | rs11612436 | 0.331541  | 0.283986     | 0.02059928  |
| 18         | rs9946768  | 0.469424  | 0.416865     | 0.02059928  |
| 9          | rs12552748 | 0.505376  | 0.452981     | 0.020610418 |
| 11         | rs4536260  | 0.236559  | 0.283549     | 0.020610418 |
| 13         | rs1431769  | 0.256318  | 0.304192     | 0.020610418 |
| 15         | rs903428   | 0.275986  | 0.324642     | 0.020610418 |
| 17         | rs12951053 | 0.0989209 | 0.0716968    | 0.020610418 |
| 21         | rs9983328  | 0.201439  | 0.161614     | 0.020610418 |
| 10         | rs9423936  | 0.297834  | 0.251533     | 0.020621563 |
| 10         | rs17824653 | 0.100358  | 0.136751     | 0.020621563 |
| 12         | rs11175944 | 0.0412186 | 0.0669734    | 0.020621563 |
| 6          | rs7741085  | 0.471326  | 0.419564     | 0.020632714 |
| 13         | rs10507375 | 0.184588  | 0.146798     | 0.020632714 |
| 3          | rs1918399  | 0.519713  | 0.467962     | 0.020643872 |
| 2          | rs707098   | 0.417266  | 0.470338     | 0.020655035 |
| 2          | rs2042784  | 0.265233  | 0.313799     | 0.020655035 |
| 3          | rs6775783  | 0.296763  | 0.345957     | 0.020655035 |
| 8          | rs1077434  | 0.143885  | 0.110372     | 0.020655035 |
| 13         | rs2491218  | 0.247292  | 0.20371      | 0.020655035 |
| 13         | rs10508168 | 0.306159  | 0.260136     | 0.020655035 |
| 2          | rs13385981 | 0.424731  | 0.373593     | 0.020666205 |
| 4          | rs1430581  | 0.510791  | 0.458078     | 0.020666205 |
| 2          | rs2374240  | 0.40681   | 0.356218     | 0.020677381 |
| 3          | rs4465943  | 0.410394  | 0.463215     | 0.020688563 |
| 6          | rs7743738  | 0.227437  | 0.185817     | 0.020688563 |
| 20         | rs462202   | 0.32852   | 0.380928     | 0.020688563 |
| 3          | rs6438441  | 0.105735  | 0.077448     | 0.020699752 |
| 9          | rs10820241 | 0.272401  | 0.321173     | 0.020699752 |
| 12         | rs7953657  | 0.0701439 | 0.101877     | 0.020699752 |
| 13         | rs7986361  | 0.276978  | 0.231437     | 0.020699752 |
| 14         | rs10136383 | 0.0956679 | 0.0685002    | 0.020699752 |
| 21         | rs9977075  | 0.283154  | 0.332766     | 0.020699752 |
| 1          | rs11118429 | 0.132616  | 0.17212      | 0.020710947 |
| 7          | rs10233490 | 0.191756  | 0.153427     | 0.020710947 |
| 10         | rs11816824 | 0.107527  | 0.143805     | 0.020722148 |
| 12         | rs7304118  | 0.329749  | 0.381601     | 0.020722148 |
| 13         | rs7317693  | 0.421147  | 0.370225     | 0.020722148 |
| 2          | rs6706570  | 0.310469  | 0.361546     | 0.020733355 |
| 6          | rs17421624 | 0.250896  | 0.300034     | 0.020733355 |
| 8          | rs1346090  | 0.401434  | 0.351038     | 0.020733355 |
| 15         | rs899746   | 0.333333  | 0.284911     | 0.020733355 |
| 22         | rs130503   | 0.46223   | 0.410068     | 0.020733355 |
| 1          | rs10494369 | 0.124549  | 0.0938991    | 0.020744569 |
| 9          | rs745852   | 0.127698  | 0.0964225    | 0.020744569 |
| 12         | rs2374710  | 0.406475  | 0.356094     | 0.020744569 |
| 16         | rs17487769 | 0.146209  | 0.187329     | 0.020744569 |
| 22         | rs17759843 | 0.128159  | 0.0964942    | 0.020744569 |
| 2          | rs7581682  | 0.156475  | 0.121341     | 0.020755789 |
| 3          | rs33485    | 0.221223  | 0.267881     | 0.020755789 |
| 5          | rs1508873  | 0.208633  | 0.16871      | 0.020755789 |

Table DS2: All SNPs tested for association (RDC SABP vs. controls) with the Cochran-Armitage trend test and significant at the p=0.05 threshold.

| chromosome | SNP        | MAF_cases | MAF_controls | p_value     |
|------------|------------|-----------|--------------|-------------|
| 6          | rs1334706  | 0.048913  | 0.0771068    | 0.020755789 |
| 8          | rs4737311  | 0.143369  | 0.109973     | 0.020755789 |
| 11         | rs11225907 | 0.143885  | 0.110354     | 0.020755789 |
| 15         | rs8032981  | 0.286738  | 0.240716     | 0.020755789 |
| 6          | rs9365310  | 0.448029  | 0.500854     | 0.020767015 |
| 20         | rs6016445  | 0.397849  | 0.450085     | 0.020767015 |
| 4          | rs11947781 | 0.172043  | 0.215626     | 0.020778247 |
| 11         | rs6578793  | 0.223022  | 0.181679     | 0.020778247 |
| 1          | rs12754690 | 0.541367  | 0.4879       | 0.020789486 |
| 5          | rs7706656  | 0.433692  | 0.382975     | 0.020789486 |
| 16         | rs6497420  | 0.145683  | 0.186415     | 0.020789486 |
| 20         | rs8117563  | 0.0770609 | 0.109311     | 0.020789486 |
| 2          | rs10221863 | 0.179211  | 0.142346     | 0.020800731 |
| 3          | rs1349608  | 0.507194  | 0.454158     | 0.020800731 |
| 4          | rs315372   | 0.127698  | 0.0963773    | 0.020800731 |
| 4          | rs12331118 | 0.349462  | 0.300613     | 0.020800731 |
| 5          | rs11133684 | 0.256272  | 0.212704     | 0.020800731 |
| 6          | rs4945983  | 0.385305  | 0.33532      | 0.020800731 |
| 8          | rs2006717  | 0.385305  | 0.437138     | 0.020800731 |
| 13         | rs875913   | 0.164875  | 0.206914     | 0.020800731 |
| 5          | rs257699   | 0.189964  | 0.152196     | 0.020811982 |
| 10         | rs16909813 | 0.107527  | 0.143782     | 0.020811982 |
| 6          | rs679313   | 0.521583  | 0.469485     | 0.02082324  |
| 7          | rs3807811  | 0.318996  | 0.370181     | 0.02082324  |
| 11         | rs1388535  | 0.224014  | 0.18264      | 0.02082324  |
| 5          | rs2731824  | 0.334532  | 0.38569      | 0.020834504 |
| 9          | rs10116672 | 0.120072  | 0.0891763    | 0.020834504 |
| 17         | rs6503197  | 0.505396  | 0.452827     | 0.020834504 |
| 19         | rs17309382 | 0.170251  | 0.133776     | 0.020834504 |
| 4          | rs1158684  | 0.537634  | 0.484173     | 0.020845774 |
| 5          | rs4957204  | 0.370968  | 0.321234     | 0.020845774 |
| 5          | rs6875344  | 0.275986  | 0.325732     | 0.020845774 |
| 6          | rs1572208  | 0.464158  | 0.411755     | 0.020845774 |
| 17         | rs9747501  | 0.311828  | 0.265066     | 0.020845774 |
| 2          | rs7561407  | 0.137993  | 0.178377     | 0.020857051 |
| 13         | rs2261120  | 0.136691  | 0.103996     | 0.020857051 |
| 20         | rs2294906  | 0.24552   | 0.203552     | 0.020857051 |
| 22         | rs5769820  | 0.292115  | 0.342195     | 0.020857051 |
| 1          | rs4648500  | 0.320789  | 0.371633     | 0.020868334 |
| 3          | rs1545324  | 0.31362   | 0.266178     | 0.020868334 |
| 2          | rs4667175  | 0.378136  | 0.429666     | 0.020879623 |
| 9          | rs9785204  | 0.116487  | 0.0869639    | 0.020879623 |
| 10         | rs2306319  | 0.349462  | 0.300205     | 0.020879623 |
| 16         | rs11860830 | 0.267986  | 0.224232     | 0.020879623 |
| 2          | rs12712756 | 0.40681   | 0.356339     | 0.020890918 |
| 2          | rs13029838 | 0.250896  | 0.207184     | 0.020890918 |
| 14         | rs10131427 | 0.314748  | 0.365974     | 0.020890918 |
| 2          | rs9636438  | 0.31362   | 0.266962     | 0.020913528 |
| 2          | rs7583970  | 0.0683453 | 0.099182     | 0.020913528 |
| 3          | rs779596   | 0.209677  | 0.255881     | 0.020913528 |
| 4          | rs1026529  | 0.146953  | 0.187883     | 0.020913528 |
| 11         | rs12806901 | 0.274194  | 0.229472     | 0.020924843 |

Table DS2: All SNPs tested for association (RDC SABP vs. controls) with the Cochran-Armitage trend test and significant at the p=0.05 threshold.

| chromosome | SNP        | MAF_cases | MAF_controls | p_value     |
|------------|------------|-----------|--------------|-------------|
| 4          | rs286451   | 0.344086  | 0.295609     | 0.020936164 |
| 6          | rs7775215  | 0.419355  | 0.368914     | 0.020936164 |
| 12         | rs17512763 | 0.203971  | 0.16394      | 0.020936164 |
| 4          | rs12511441 | 0.113309  | 0.0837875    | 0.020947491 |
| 12         | rs4763181  | 0.433692  | 0.382383     | 0.020947491 |
| 6          | rs9384573  | 0.179211  | 0.141908     | 0.020958824 |
| 10         | rs2148269  | 0.155914  | 0.121295     | 0.020958824 |
| 14         | rs10136006 | 0.136691  | 0.103584     | 0.020958824 |
| 19         | rs11673332 | 0.102151  | 0.138066     | 0.020958824 |
| 10         | rs11008642 | 0.128159  | 0.166894     | 0.020970164 |
| 16         | rs9937227  | 0.0824373 | 0.11566      | 0.020970164 |
| 4          | rs11944996 | 0.125448  | 0.0944426    | 0.02098151  |
| 4          | rs13125312 | 0.297834  | 0.347871     | 0.02098151  |
| 22         | rs4820242  | 0.426523  | 0.376108     | 0.02098151  |
| 5          | rs32784    | 0.170863  | 0.214505     | 0.020992863 |
| 10         | rs303468   | 0.0878136 | 0.0620102    | 0.020992863 |
| 1          | rs298152   | 0.311828  | 0.265678     | 0.021004222 |
| 21         | rs4817775  | 0.47491   | 0.423208     | 0.021004222 |
| 2          | rs6738923  | 0.0683453 | 0.0988412    | 0.021015587 |
| 6          | rs3128966  | 0.130824  | 0.170412     | 0.021015587 |
| 13         | rs2066629  | 0.107914  | 0.144804     | 0.021015587 |
| 1          | rs1335929  | 0.374552  | 0.42609      | 0.021026959 |
| 3          | rs9810132  | 0.207885  | 0.25332      | 0.021026959 |
| 3          | rs9289536  | 0.220217  | 0.179277     | 0.021026959 |
| 5          | rs721077   | 0.0996377 | 0.135278     | 0.021026959 |
| 16         | rs1876976  | 0.141577  | 0.107836     | 0.021026959 |
| 22         | rs451740   | 0.354839  | 0.305688     | 0.021026959 |
| 5          | rs2176831  | 0.225806  | 0.184642     | 0.021038337 |
| 6          | rs6902115  | 0.294964  | 0.249489     | 0.021038337 |
| 2          | rs969876   | 0.455197  | 0.403885     | 0.021049721 |
| 2          | rs864697   | 0.38172   | 0.43322      | 0.021049721 |
| 4          | rs1598859  | 0.413669  | 0.363497     | 0.021049721 |
| 5          | rs7702424  | 0.241935  | 0.199251     | 0.021049721 |
| 5          | rs1643893  | 0.415468  | 0.364814     | 0.021049721 |
| 5          | rs7729949  | 0.157706  | 0.123292     | 0.021049721 |
| 10         | rs7096206  | 0.166667  | 0.208958     | 0.021049721 |
| 3          | rs11129300 | 0.528777  | 0.475443     | 0.021061112 |
| 5          | rs2561142  | 0.394265  | 0.445693     | 0.021061112 |
| 20         | rs11696113 | 0.261649  | 0.31018      | 0.021061112 |
| 1          | rs959414   | 0.501799  | 0.448875     | 0.021072509 |
| 4          | rs3774959  | 0.413669  | 0.363528     | 0.021072509 |
| 6          | rs1036288  | 0.34767   | 0.398807     | 0.021072509 |
| 11         | rs6589684  | 0.248188  | 0.20526      | 0.021072509 |
| 16         | rs2315080  | 0.0395683 | 0.0646317    | 0.021072509 |
| 21         | rs2823084  | 0.15343   | 0.119299     | 0.021072509 |
| 8          | rs1532799  | 0.508961  | 0.455677     | 0.021083912 |
| 14         | rs8020986  | 0.116487  | 0.154527     | 0.021083912 |
| 2          | rs185925   | 0.375899  | 0.325894     | 0.021095322 |
| 7          | rs1562835  | 0.141577  | 0.108518     | 0.021095322 |
| 8          | rs7816345  | 0.204301  | 0.16485      | 0.021095322 |
| 12         | rs1860394  | 0.411552  | 0.360457     | 0.021095322 |
| 5          | rs13164890 | 0.408602  | 0.357508     | 0.021106739 |

Table DS2: All SNPs tested for association (RDC SABP vs. controls) with the Cochran-Armitage trend test and significant at the p=0.05 threshold.

| chromosome | SNP        | MAF_cases | MAF_controls | p_value     |
|------------|------------|-----------|--------------|-------------|
| 10         | rs4935545  | 0.130824  | 0.0987697    | 0.021106739 |
| 7          | rs11978267 | 0.23741   | 0.284571     | 0.021118161 |
| 10         | rs12571870 | 0.478495  | 0.426431     | 0.021118161 |
| 17         | rs4985955  | 0.166667  | 0.209639     | 0.021118161 |
| 9          | rs12686449 | 0.24552   | 0.293103     | 0.02112959  |
| 20         | rs154876   | 0.311828  | 0.361282     | 0.02112959  |
| 22         | rs13055147 | 0.22043   | 0.179775     | 0.02112959  |
| 5          | rs13153619 | 0.296763  | 0.250427     | 0.021141026 |
| 7          | rs719423   | 0.437276  | 0.386123     | 0.021141026 |
| 1          | rs10922726 | 0.469534  | 0.417405     | 0.021152468 |
| 5          | rs4554233  | 0.222222  | 0.181261     | 0.021152468 |
| 3          | rs17380584 | 0.243728  | 0.290943     | 0.021163916 |
| 4          | rs315343   | 0.129032  | 0.0977188    | 0.021163916 |
| 11         | rs10894834 | 0.406475  | 0.356288     | 0.021163916 |
| 12         | rs9300191  | 0.261649  | 0.218111     | 0.021163916 |
| 1          | rs6657415  | 0.236559  | 0.283816     | 0.021175371 |
| 1          | rs3922506  | 0.401434  | 0.35029      | 0.021175371 |
| 2          | rs1430195  | 0.259857  | 0.307666     | 0.021175371 |
| 5          | rs4382127  | 0.284173  | 0.333958     | 0.021175371 |
| 17         | rs17249326 | 0.193548  | 0.155472     | 0.021175371 |
| 5          | rs2086634  | 0.370504  | 0.320832     | 0.021186832 |
| 6          | rs7757142  | 0.163082  | 0.204731     | 0.021186832 |
| 8          | rs8180892  | 0.419355  | 0.367757     | 0.021186832 |
| 8          | rs964764   | 0.508961  | 0.455707     | 0.021186832 |
| 16         | rs13332945 | 0.476703  | 0.423798     | 0.021186832 |
| 7          | rs4722426  | 0.415771  | 0.467769     | 0.0211983   |
| 10         | rs11006908 | 0.309353  | 0.359332     | 0.0211983   |
| 13         | rs7335638  | 0.430108  | 0.379175     | 0.0211983   |
| 20         | rs845597   | 0.136201  | 0.104025     | 0.0211983   |
| 10         | rs10785909 | 0.33871   | 0.291012     | 0.021209773 |
| 13         | rs184828   | 0.408602  | 0.357362     | 0.021209773 |
| 1          | rs17315298 | 0.157706  | 0.122783     | 0.021221254 |
| 6          | rs12525019 | 0.167266  | 0.131525     | 0.021221254 |
| 10         | rs10823747 | 0.329749  | 0.282283     | 0.021221254 |
| 11         | rs424989   | 0.318996  | 0.370143     | 0.021221254 |
| 11         | rs2173406  | 0.177419  | 0.221485     | 0.021232741 |
| 13         | rs17088577 | 0.0681004 | 0.0458575    | 0.021232741 |
| 15         | rs7496712  | 0.327338  | 0.378664     | 0.021232741 |
| 20         | rs16999008 | 0.105735  | 0.142589     | 0.021232741 |
| 2          | rs908993   | 0.253597  | 0.21015      | 0.021244234 |
| 4          | rs10939243 | 0.330935  | 0.382022     | 0.021244234 |
| 2          | rs3748863  | 0.392473  | 0.342599     | 0.021255734 |
| 2          | rs12694416 | 0.359206  | 0.411725     | 0.02126724  |
| 7          | rs10232053 | 0.17509   | 0.217769     | 0.02126724  |
| 10         | rs4750290  | 0.0358423 | 0.060477     | 0.02126724  |
| 13         | rs7999734  | 0.160072  | 0.124701     | 0.02126724  |
| 1          | rs4658015  | 0.0860215 | 0.0605182    | 0.021278753 |
| 4          | rs10857214 | 0.248201  | 0.205491     | 0.021278753 |
| 7          | rs17507248 | 0.214029  | 0.174284     | 0.021278753 |
| 3          | rs11918416 | 0.256272  | 0.21302      | 0.021290272 |
| 5          | rs4835768  | 0.539427  | 0.486887     | 0.021290272 |
| 16         | rs1390892  | 0.333333  | 0.384379     | 0.021290272 |



Table DS2: All SNPs tested for association (RDC SABP vs. controls) with the Cochran-Armitage trend test and significant at the p=0.05 threshold.

| chromosome | SNP           | MAF_cases | MAF_controls | p_value     |
|------------|---------------|-----------|--------------|-------------|
| 2          | rs4952362     | 0.40681   | 0.356486     | 0.021301797 |
| 11         | rs1241863     | 0.304659  | 0.258345     | 0.021301797 |
| 22         | rs450960      | 0.354839  | 0.305792     | 0.021301797 |
| 3          | rs11709024    | 0.265233  | 0.314247     | 0.021313329 |
| 4          | rs315364      | 0.129032  | 0.097752     | 0.021313329 |
| 1          | rs12044778    | 0.215054  | 0.175017     | 0.021324868 |
| 1          | rs6662583     | 0.342294  | 0.393867     | 0.021324868 |
| 4          | rs2969172     | 0.336331  | 0.288153     | 0.021324868 |
| 13         | rs4147047     | 0.179211  | 0.142005     | 0.021324868 |
| 2          | rs2363078     | 0.299283  | 0.348655     | 0.021336412 |
| 8          | rs6981388     | 0.189964  | 0.235254     | 0.021336412 |
| 16         | rs1865806     | 0.514337  | 0.461958     | 0.021336412 |
| 13         | rs9554196     | 0.195341  | 0.157016     | 0.021347964 |
| 21         | rs13049227    | 0.469424  | 0.418315     | 0.021347964 |
| 12         | rs11058785    | 0.113309  | 0.150563     | 0.021359522 |
| 3          | rs6784820     | 0.384477  | 0.436903     | 0.021371086 |
| 3          | rs6776166     | 0.12724   | 0.0958461    | 0.021371086 |
| 5          | rs12654393    | 0.285971  | 0.240204     | 0.021371086 |
| 5          | rs4704591     | 0.348921  | 0.400683     | 0.021371086 |
| 5          | rs11740646    | 0.433692  | 0.383214     | 0.021371086 |
| 8          | rs7818056     | 0.343525  | 0.295152     | 0.021371086 |
| 12         | rs17120381    | 0.170863  | 0.134707     | 0.021371086 |
| 16         | rs9939346     | 0.09319   | 0.128109     | 0.021371086 |
| 1          | rs12034802    | 0.446237  | 0.498298     | 0.021382657 |
| 5          | rs11949567    | 0.415771  | 0.468473     | 0.021382657 |
| 1          | rs7527490     | 0.449821  | 0.501873     | 0.021394234 |
| 10         | rs2742234     | 0.190647  | 0.234673     | 0.021394234 |
| 18         | rs12955772    | 0.444444  | 0.392638     | 0.021405818 |
| 1          | rs7525422     | 0.156475  | 0.198534     | 0.021417408 |
| 5          | rs248779      | 0.430108  | 0.379598     | 0.021417408 |
| 12         | rs7972187     | 0.15233   | 0.117637     | 0.021417408 |
| 1          | rs11585077    | 0.218638  | 0.178255     | 0.021429005 |
| 2          | rs2374342     | 0.317204  | 0.367892     | 0.021429005 |
| 3          | rs17807236    | 0.430108  | 0.482283     | 0.021429005 |
| 8          | rs4875442     | 0.467626  | 0.415899     | 0.021429005 |
| 11         | rs16917285    | 0.143369  | 0.109802     | 0.021429005 |
| 11         | rs517089      | 0.140288  | 0.180688     | 0.021429005 |
| 16         | rs12925035    | 0.168459  | 0.132709     | 0.021429005 |
| 1          | rs10495244    | 0.145161  | 0.1855       | 0.021440608 |
| 6          | rs220383      | 0.512545  | 0.459768     | 0.021440608 |
| 8          | SNP_A-2309173 | 0.207885  | 0.168256     | 0.021440608 |
| 10         | rs2580887     | 0.0359712 | 0.060477     | 0.021440608 |
| 13         | rs7994951     | 0.0683453 | 0.0459966    | 0.021440608 |
| 1          | rs17709142    | 0.0701439 | 0.101909     | 0.021452218 |
| 16         | rs12709102    | 0.37276   | 0.423943     | 0.021452218 |
| 17         | rs11078060    | 0.158273  | 0.124064     | 0.021452218 |
| 19         | rs17691043    | 0.21147   | 0.171156     | 0.021452218 |
| 11         | rs2305982     | 0.105735  | 0.141616     | 0.021463834 |
| 13         | rs17088579    | 0.0681004 | 0.0458262    | 0.021463834 |
| 2          | rs759357      | 0.188172  | 0.150034     | 0.021475457 |
| 2          | rs12693888    | 0.201439  | 0.24676      | 0.021475457 |
| 5          | rs2007136     | 0.354839  | 0.406517     | 0.021487086 |

Table DS2: All SNPs tested for association (RDC SABP vs. controls) with the Cochran-Armitage trend test and significant at the p=0.05 threshold.

| chromosome | SNP        | MAF_cases | MAF_controls | p_value     |
|------------|------------|-----------|--------------|-------------|
| 1          | rs1695960  | 0.132616  | 0.172232     | 0.021498722 |
| 4          | rs12501586 | 0.338129  | 0.289662     | 0.021498722 |
| 16         | rs4356478  | 0.146953  | 0.187351     | 0.021498722 |
| 2          | rs4571012  | 0.198925  | 0.159796     | 0.021510365 |
| 7          | rs1377374  | 0.448029  | 0.500512     | 0.021510365 |
| 11         | rs1113480  | 0.227599  | 0.274122     | 0.021510365 |
| 4          | rs4648055  | 0.345324  | 0.297412     | 0.021522014 |
| 6          | rs9405550  | 0.132616  | 0.100647     | 0.021522014 |
| 8          | rs16934224 | 0.379061  | 0.328956     | 0.021522014 |
| 8          | rs9297482  | 0.508961  | 0.455832     | 0.021522014 |
| 11         | rs4923460  | 0.166667  | 0.209298     | 0.021522014 |
| 14         | rs1257416  | 0.293907  | 0.343495     | 0.021522014 |
| 10         | rs2148021  | 0.259857  | 0.309004     | 0.021533669 |
| 1          | rs1690551  | 0.505396  | 0.454189     | 0.021545331 |
| 3          | rs9839551  | 0.428315  | 0.481437     | 0.021545331 |
| 4          | rs16897607 | 0.0685921 | 0.0996593    | 0.021545331 |
| 4          | rs2461796  | 0.43705   | 0.38586      | 0.021545331 |
| 11         | rs10501083 | 0.462366  | 0.410733     | 0.021545331 |
| 11         | rs17094347 | 0.109319  | 0.0804089    | 0.021545331 |
| 18         | rs624735   | 0.11828   | 0.0878747    | 0.021545331 |
| 8          | rs6472997  | 0.234767  | 0.282016     | 0.021556999 |
| 17         | rs4239268  | 0.0878136 | 0.062223     | 0.021556999 |
| 18         | rs3017274  | 0.424731  | 0.373638     | 0.021556999 |
| 2          | rs7565546  | 0.240143  | 0.287321     | 0.021568674 |
| 7          | rs10046536 | 0.424731  | 0.477172     | 0.021568674 |
| 12         | rs6488250  | 0.15233   | 0.117717     | 0.021568674 |
| 13         | rs9531827  | 0.243728  | 0.202008     | 0.021568674 |
| 15         | rs7181856  | 0.360215  | 0.312564     | 0.021568674 |
| 19         | rs8104094  | 0.227437  | 0.186094     | 0.021568674 |
| 1          | rs6702820  | 0.18638   | 0.22955      | 0.021580356 |
| 2          | rs10191817 | 0.100719  | 0.0725724    | 0.021580356 |
| 7          | rs10226831 | 0.0698925 | 0.100681     | 0.021580356 |
| 10         | rs619824   | 0.376344  | 0.429083     | 0.021580356 |
| 13         | rs206321   | 0.204301  | 0.164906     | 0.021580356 |
| 13         | rs9594780  | 0.257194  | 0.305281     | 0.021580356 |
| 13         | rs354784   | 0.154122  | 0.194653     | 0.021580356 |
| 17         | rs8077375  | 0.113718  | 0.151484     | 0.021580356 |
| 18         | rs7240443  | 0.419355  | 0.471891     | 0.021580356 |
| 5          | rs1376326  | 0.136691  | 0.103982     | 0.021592044 |
| 7          | rs801145   | 0.141577  | 0.108348     | 0.021592044 |
| 2          | rs4952460  | 0.40681   | 0.356583     | 0.021603739 |
| 8          | rs9329223  | 0.392473  | 0.44399      | 0.021603739 |
| 15         | rs11856226 | 0.256272  | 0.304259     | 0.021603739 |
| 3          | rs12497163 | 0.428315  | 0.481437     | 0.02161544  |
| 9          | rs1348452  | 0.225806  | 0.185116     | 0.02161544  |
| 11         | rs2595478  | 0.434783  | 0.487913     | 0.02161544  |
| 13         | rs17312529 | 0.168459  | 0.211342     | 0.02161544  |
| 1          | rs6426434  | 0.267148  | 0.315565     | 0.021627148 |
| 1          | rs7523829  | 0.519713  | 0.466814     | 0.021627148 |
| 20         | rs6043282  | 0.480287  | 0.42862      | 0.021627148 |
| 8          | rs17117615 | 0.473118  | 0.421609     | 0.021638862 |
| 10         | rs10509066 | 0.107527  | 0.143539     | 0.021638862 |

Table DS2: All SNPs tested for association (RDC SABP vs. controls) with the Cochran-Armitage trend test and significant at the p=0.05 threshold.

| chromosome | SNP           | MAF_cases | MAF_controls | p_value     |
|------------|---------------|-----------|--------------|-------------|
| 16         | rs11149888    | 0.209677  | 0.254598     | 0.021638862 |
| 3          | rs13088064    | 0.428315  | 0.481418     | 0.021650583 |
| 3          | rs4679958     | 0.472924  | 0.419905     | 0.021650583 |
| 3          | rs2055033     | 0.297491  | 0.347767     | 0.021650583 |
| 11         | rs2595456     | 0.435484  | 0.488416     | 0.021650583 |
| 13         | rs7326697     | 0.185921  | 0.147952     | 0.021650583 |
| 5          | rs7723446     | 0.202509  | 0.246846     | 0.021662311 |
| 11         | rs10500791    | 0.0413669 | 0.0672684    | 0.021662311 |
| 15         | rs17779494    | 0.177419  | 0.220102     | 0.021662311 |
| 1          | rs11118430    | 0.132616  | 0.171726     | 0.021674045 |
| 4          | rs17029494    | 0.198925  | 0.159973     | 0.021674045 |
| 12         | rs10734948    | 0.112903  | 0.150204     | 0.021674045 |
| 3          | rs4687321     | 0.241007  | 0.198637     | 0.021685786 |
| 5          | SNP_A-2241696 | 0.0985663 | 0.0714042    | 0.021685786 |
| 8          | rs7842864     | 0.240072  | 0.287466     | 0.021685786 |
| 9          | rs4877824     | 0.442652  | 0.391349     | 0.021685786 |
| 9          | rs12337267    | 0.217626  | 0.263714     | 0.021685786 |
| 12         | rs11116088    | 0.281362  | 0.23641      | 0.021685786 |
| 14         | rs3783437     | 0.231183  | 0.189585     | 0.021685786 |
| 18         | rs583523      | 0.347122  | 0.299387     | 0.021685786 |
| 10         | rs10762712    | 0.401079  | 0.453476     | 0.021697533 |
| 1          | rs457397      | 0.0734767 | 0.0502898    | 0.021709287 |
| 3          | rs6785140     | 0.184588  | 0.228124     | 0.021709287 |
| 9          | rs10125466    | 0.405018  | 0.355124     | 0.021709287 |
| 11         | rs10768202    | 0.258993  | 0.215285     | 0.021709287 |
| 13         | rs1867768     | 0.27518   | 0.230153     | 0.021709287 |
| 14         | rs7159423     | 0.420863  | 0.472932     | 0.021709287 |
| 9          | rs681572      | 0.347122  | 0.398398     | 0.021721047 |
| 11         | rs1786845     | 0.157706  | 0.199351     | 0.021721047 |
| 20         | rs1998118     | 0.399281  | 0.451124     | 0.021721047 |
| 2          | rs2085852     | 0.383094  | 0.33339      | 0.021732814 |
| 5          | rs529279      | 0.516129  | 0.463045     | 0.021732814 |
| 8          | rs10955009    | 0.204301  | 0.165077     | 0.021732814 |
| 15         | rs12443387    | 0.390681  | 0.442511     | 0.021732814 |
| 17         | rs2125348     | 0.336331  | 0.288612     | 0.021732814 |
| 1          | rs11261025    | 0.057971  | 0.0873422    | 0.021744588 |
| 2          | SNP_A-1791407 | 0.259857  | 0.30743      | 0.021744588 |
| 3          | rs17033655    | 0.127698  | 0.0964942    | 0.021744588 |
| 18         | rs10153433    | 0.390288  | 0.442662     | 0.021744588 |
| 2          | rs17328734    | 0.544803  | 0.491828     | 0.021756368 |
| 2          | rs6744383     | 0.193548  | 0.237747     | 0.021756368 |
| 13         | rs10851295    | 0.350719  | 0.30225      | 0.021756368 |
| 15         | rs2959016     | 0.146953  | 0.187223     | 0.021756368 |
| 2          | rs10205312    | 0.374552  | 0.42638      | 0.021791749 |
| 6          | rs7769605     | 0.305755  | 0.259619     | 0.021791749 |
| 6          | rs626068      | 0.21147   | 0.17155      | 0.021803555 |
| 7          | rs4726388     | 0.191756  | 0.153781     | 0.021803555 |
| 12         | rs11182273    | 0.183453  | 0.226499     | 0.021803555 |
| 16         | rs1450360     | 0.139785  | 0.180205     | 0.021803555 |
| 20         | rs4814334     | 0.22482   | 0.183628     | 0.021803555 |
| 8          | rs4875133     | 0.297491  | 0.251279     | 0.021815369 |
| 18         | rs7233297     | 0.120072  | 0.157814     | 0.021815369 |

Table DS2: All SNPs tested for association (RDC SABP vs. controls) with the Cochran-Armitage trend test and significant at the p=0.05 threshold.

| chromosome | SNP           | MAF_cases | MAF_controls | p_value     |
|------------|---------------|-----------|--------------|-------------|
| 18         | rs768206      | 0.345878  | 0.397204     | 0.021815369 |
| 1          | rs1740118     | 0.132616  | 0.17196      | 0.021827189 |
| 4          | rs2319246     | 0.417563  | 0.470027     | 0.021827189 |
| 20         | rs6080716     | 0.532258  | 0.479571     | 0.021827189 |
| 2          | rs6721943     | 0.18705   | 0.231005     | 0.021850849 |
| 5          | rs257700      | 0.189964  | 0.152522     | 0.021850849 |
| 11         | rs6590474     | 0.316364  | 0.36645      | 0.021850849 |
| 16         | rs312135      | 0.526978  | 0.474608     | 0.021850849 |
| 12         | SNP_A-2117262 | 0.194946  | 0.156793     | 0.021862689 |
| 3          | rs10513294    | 0.311151  | 0.265157     | 0.021874535 |
| 5          | rs7718813     | 0.0412186 | 0.0672226    | 0.021874535 |
| 15         | rs12916488    | 0.177419  | 0.220764     | 0.021874535 |
| 1          | rs16839634    | 0.318996  | 0.27265      | 0.021886388 |
| 5          | rs13153032    | 0.140794  | 0.107459     | 0.021886388 |
| 11         | rs6589369     | 0.539427  | 0.486878     | 0.021886388 |
| 12         | rs7133790     | 0.111111  | 0.0818584    | 0.021886388 |
| 13         | rs11618006    | 0.0752688 | 0.107021     | 0.021886388 |
| 1          | rs3811024     | 0.19964   | 0.244214     | 0.021898248 |
| 3          | rs6785030     | 0.18638   | 0.230048     | 0.021898248 |
| 1          | rs3790437     | 0.209386  | 0.170245     | 0.021910115 |
| 10         | rs3852459     | 0.227599  | 0.186415     | 0.021910115 |
| 18         | rs10502927    | 0.0681004 | 0.0983997    | 0.021910115 |
| 1          | rs1466654     | 0.374552  | 0.425717     | 0.021921988 |
| 16         | rs8049171     | 0.347122  | 0.39748      | 0.021921988 |
| 12         | rs17722716    | 0.193141  | 0.237129     | 0.021933868 |
| 1          | rs6426096     | 0.378136  | 0.430522     | 0.021945754 |
| 3          | rs4686274     | 0.286738  | 0.336797     | 0.021957647 |
| 6          | rs10456715    | 0.320789  | 0.371891     | 0.021957647 |
| 6          | rs7762618     | 0.377698  | 0.430177     | 0.021957647 |
| 10         | rs10788229    | 0.478495  | 0.426746     | 0.021957647 |
| 19         | rs4804596     | 0.476364  | 0.424036     | 0.021957647 |
| 9          | rs11140857    | 0.0577617 | 0.0868529    | 0.021969547 |
| 5          | rs16893684    | 0.286738  | 0.24182      | 0.021981454 |
| 17         | rs6502674     | 0.376344  | 0.327304     | 0.021981454 |
| 18         | rs1840558     | 0.247312  | 0.20515      | 0.021981454 |
| 2          | rs6728124     | 0.137993  | 0.178316     | 0.021993367 |
| 5          | rs6880870     | 0.483871  | 0.432437     | 0.021993367 |
| 7          | rs9638699     | 0.207885  | 0.252386     | 0.021993367 |
| 7          | rs7795598     | 0.270609  | 0.319577     | 0.021993367 |
| 19         | rs17685204    | 0.0752688 | 0.107459     | 0.021993367 |
| 20         | rs6045798     | 0.261649  | 0.30937      | 0.021993367 |
| 4          | rs6831735     | 0.501799  | 0.449387     | 0.022005287 |
| 5          | rs6882897     | 0.491039  | 0.438821     | 0.022005287 |
| 9          | rs4837502     | 0.227599  | 0.274199     | 0.022005287 |
| 10         | SNP_A-4255892 | 0.315412  | 0.268733     | 0.022005287 |
| 12         | rs2430624     | 0.203237  | 0.164108     | 0.022005287 |
| 15         | rs7171020     | 0.304659  | 0.258004     | 0.022005287 |
| 2          | rs7599534     | 0.40681   | 0.356729     | 0.022017213 |
| 1          | rs2576234     | 0.216846  | 0.262781     | 0.022029147 |
| 13         | rs9551011     | 0.193548  | 0.238404     | 0.022029147 |
| 3          | rs2167937     | 0.428315  | 0.481273     | 0.022041086 |
| 10         | rs4748047     | 0.422939  | 0.372271     | 0.022041086 |

Table DS2: All SNPs tested for association (RDC SABP vs. controls) with the Cochran-Armitage trend test and significant at the p=0.05 threshold.

| chromosome | SNP           | MAF_cases | MAF_controls | p_value     |
|------------|---------------|-----------|--------------|-------------|
| 12         | rs10777745    | 0.467742  | 0.416325     | 0.022041086 |
| 13         | rs9579129     | 0.197133  | 0.158487     | 0.022041086 |
| 3          | rs7649133     | 0.451439  | 0.400545     | 0.022053033 |
| 4          | rs4389575     | 0.440647  | 0.493011     | 0.022053033 |
| 6          | rs1415030     | 0.336331  | 0.289025     | 0.022053033 |
| 11         | rs572075      | 0.238267  | 0.285032     | 0.022053033 |
| 4          | rs2629718     | 0.0340502 | 0.0577186    | 0.022064987 |
| 5          | rs460844      | 0.505376  | 0.453941     | 0.022064987 |
| 7          | rs17163237    | 0.244565  | 0.293374     | 0.022064987 |
| 15         | rs5000770     | 0.375     | 0.326228     | 0.022064987 |
| 1          | rs7414079     | 0.0591398 | 0.0881552    | 0.022076947 |
| 17         | rs8080471     | 0.354317  | 0.306369     | 0.022076947 |
| 2          | rs1548876     | 0.188172  | 0.150204     | 0.022088913 |
| 3          | rs11923256    | 0.33213   | 0.383345     | 0.022088913 |
| 5          | rs2619861     | 0.0519713 | 0.0802112    | 0.022088913 |
| 13         | rs17543181    | 0.315412  | 0.26855      | 0.022088913 |
| 20         | rs16999368    | 0.0899281 | 0.0639277    | 0.022088913 |
| 20         | rs2057402     | 0.261649  | 0.309305     | 0.022088913 |
| 2          | rs17010908    | 0.155914  | 0.121212     | 0.022112867 |
| 2          | rs12466233    | 0.474729  | 0.423051     | 0.022112867 |
| 11         | rs11232580    | 0.204301  | 0.16502      | 0.022112867 |
| 15         | rs6494286     | 0.285971  | 0.33498      | 0.022112867 |
| 4          | SNP_A-2156303 | 0.408602  | 0.460724     | 0.022124854 |
| 3          | rs9713061     | 0.218638  | 0.178304     | 0.022136848 |
| 11         | rs11220676    | 0.172043  | 0.214237     | 0.022136848 |
| 22         | rs5754734     | 0.473022  | 0.419939     | 0.022148848 |
| 9          | rs16922134    | 0.0949821 | 0.0685305    | 0.022160856 |
| 13         | rs2175712     | 0.374101  | 0.42592      | 0.022172869 |
| 21         | rs1473771     | 0.379928  | 0.330381     | 0.02218489  |
| 1          | rs2480693     | 0.306452  | 0.35629      | 0.022196918 |
| 1          | rs4649382     | 0.23741   | 0.284886     | 0.022196918 |
| 2          | rs4488652     | 0.172043  | 0.135683     | 0.022196918 |
| 15         | rs11636972    | 0.204301  | 0.249404     | 0.022196918 |
| 19         | rs274876      | 0.336331  | 0.38779      | 0.022196918 |
| 4          | rs4699030     | 0.460573  | 0.409632     | 0.022208952 |
| 11         | rs7931713     | 0.227599  | 0.186585     | 0.022208952 |
| 20         | rs1885080     | 0.111111  | 0.14765      | 0.022208952 |
| 4          | rs10009859    | 0.317204  | 0.367497     | 0.022220993 |
| 5          | rs7704624     | 0.535971  | 0.483986     | 0.022220993 |
| 18         | rs206545      | 0.16129   | 0.126276     | 0.022220993 |
| 18         | rs1473980     | 0.424731  | 0.373765     | 0.022220993 |
| 20         | rs4814622     | 0.532258  | 0.479727     | 0.022220993 |
| 3          | rs1212278     | 0.510791  | 0.458404     | 0.02223304  |
| 5          | rs34224       | 0.155914  | 0.198158     | 0.02223304  |
| 8          | rs2511694     | 0.277778  | 0.327251     | 0.02223304  |
| 12         | rs4463881     | 0.241935  | 0.289581     | 0.02223304  |
| 4          | SNP_A-2229768 | 0.251799  | 0.209044     | 0.022245095 |
| 4          | rs2597462     | 0.397849  | 0.348619     | 0.022245095 |
| 8          | rs6990912     | 0.396057  | 0.346285     | 0.022245095 |
| 12         | rs7959282     | 0.351254  | 0.402589     | 0.022245095 |
| 15         | rs4343227     | 0.109319  | 0.145926     | 0.022245095 |
| 6          | rs2275094     | 0.0806452 | 0.113838     | 0.022257156 |

Table DS2: All SNPs tested for association (RDC SABP vs. controls) with the Cochran-Armitage trend test and significant at the p=0.05 threshold.

| chromosome | SNP           | MAF_cases | MAF_controls | p_value     |
|------------|---------------|-----------|--------------|-------------|
| 16         | rs3809609     | 0.114695  | 0.15121      | 0.022257156 |
| 1          | rs3766031     | 0.161871  | 0.127        | 0.022269224 |
| 9          | rs10990275    | 0.247312  | 0.294719     | 0.022269224 |
| 15         | rs2117234     | 0.429856  | 0.481261     | 0.022269224 |
| 1          | rs6666248     | 0.422939  | 0.475315     | 0.022293381 |
| 8          | rs2608212     | 0.363799  | 0.415078     | 0.022293381 |
| 11         | rs11040111    | 0.33871   | 0.389098     | 0.022293381 |
| 16         | rs1687632     | 0.11828   | 0.0883856    | 0.022293381 |
| 1          | rs9726956     | 0.510753  | 0.459496     | 0.022305469 |
| 5          | rs12655994    | 0.263441  | 0.310963     | 0.022305469 |
| 15         | rs8027342     | 0.295699  | 0.250256     | 0.022305469 |
| 21         | rs8133101     | 0.107527  | 0.143101     | 0.022305469 |
| 5          | rs6881598     | 0.415771  | 0.468132     | 0.022317564 |
| 10         | rs2842096     | 0.207885  | 0.252813     | 0.022317564 |
| 11         | rs7114598     | 0.215054  | 0.260566     | 0.022317564 |
| 22         | rs1003499     | 0.415162  | 0.364349     | 0.022317564 |
| 13         | rs9545074     | 0.38172   | 0.33231      | 0.022329666 |
| 8          | rs17257150    | 0.157706  | 0.199421     | 0.022341775 |
| 13         | rs9557793     | 0.413978  | 0.36359      | 0.022341775 |
| 17         | rs8070668     | 0.324373  | 0.374702     | 0.022341775 |
| 9          | rs7041183     | 0.0503597 | 0.0779973    | 0.02235389  |
| 11         | rs10742827    | 0.215054  | 0.26047      | 0.02235389  |
| 1          | rs875976      | 0.320789  | 0.37155      | 0.022366013 |
| 4          | rs2699027     | 0.489247  | 0.43767      | 0.022366013 |
| 4          | rs12647340    | 0.526882  | 0.474267     | 0.022378142 |
| 6          | rs7761069     | 0.384892  | 0.335775     | 0.022378142 |
| 6          | rs3761789     | 0.15233   | 0.118138     | 0.022378142 |
| 9          | rs2518110     | 0.0899281 | 0.124403     | 0.022378142 |
| 13         | rs9634528     | 0.43705   | 0.386108     | 0.022378142 |
| 4          | rs13123498    | 0.415771  | 0.365142     | 0.022390278 |
| 5          | rs4700823     | 0.143369  | 0.110884     | 0.022390278 |
| 7          | rs11971451    | 0.121864  | 0.0914198    | 0.022390278 |
| 12         | rs11113470    | 0.28777   | 0.242166     | 0.022390278 |
| 16         | rs752076      | 0.31362   | 0.363016     | 0.022390278 |
| 20         | rs486937      | 0.0806452 | 0.113745     | 0.022402421 |
| 8          | rs17292662    | 0.354317  | 0.406069     | 0.02241457  |
| 15         | rs1200348     | 0.439068  | 0.491476     | 0.02241457  |
| 2          | SNP_A-2132886 | 0.0989209 | 0.0714773    | 0.022426727 |
| 5          | rs1689671     | 0.267025  | 0.22368      | 0.022426727 |
| 6          | rs3792935     | 0.0863309 | 0.061113     | 0.022426727 |
| 9          | rs13290547    | 0.0842294 | 0.0591141    | 0.022426727 |
| 13         | rs9530375     | 0.155914  | 0.197512     | 0.022426727 |
| 14         | rs1099968     | 0.34767   | 0.398706     | 0.022426727 |
| 4          | rs6534838     | 0.267986  | 0.316678     | 0.02243889  |
| 4          | rs1817417     | 0.16129   | 0.126278     | 0.02243889  |
| 9          | rs6479386     | 0.408602  | 0.358773     | 0.02243889  |
| 5          | rs423531      | 0.424731  | 0.374233     | 0.02245106  |
| 6          | rs2781652     | 0.263441  | 0.220061     | 0.02245106  |
| 2          | rs11676644    | 0.351254  | 0.302829     | 0.022463237 |
| 3          | rs6808230     | 0.209677  | 0.254518     | 0.022463237 |
| 8          | rs10957008    | 0.185252  | 0.148211     | 0.022463237 |
| 8          | rs1473923     | 0.194245  | 0.239101     | 0.022463237 |

Table DS2: All SNPs tested for association (RDC SABP vs. controls) with the Cochran-Armitage trend test and significant at the p=0.05 threshold.

| chromosome | SNP           | MAF_cases | MAF_controls | p_value     |
|------------|---------------|-----------|--------------|-------------|
| 12         | rs755660      | 0.133094  | 0.101432     | 0.022463237 |
| 16         | rs16941875    | 0.184588  | 0.22752      | 0.022463237 |
| 18         | rs17526045    | 0.105735  | 0.142078     | 0.022463237 |
| 18         | SNP_A-2292382 | 0.140794  | 0.107863     | 0.022463237 |
| 18         | rs1506326     | 0.291367  | 0.246332     | 0.022463237 |
| 1          | rs1361461     | 0.4319    | 0.483276     | 0.022475421 |
| 1          | rs12033565    | 0.0878136 | 0.121631     | 0.022475421 |
| 5          | rs17528473    | 0.100358  | 0.135899     | 0.022475421 |
| 6          | rs11757427    | 0.175627  | 0.218931     | 0.022475421 |
| 8          | rs17720712    | 0.0913978 | 0.125853     | 0.022475421 |
| 9          | rs12552784    | 0.0665468 | 0.0971321    | 0.022475421 |
| 4          | rs17282576    | 0.164875  | 0.207184     | 0.022487612 |
| 1          | rs10922771    | 0.360215  | 0.311244     | 0.022499809 |
| 3          | rs11921483    | 0.430108  | 0.481936     | 0.022499809 |
| 13         | rs12864664    | 0.0609319 | 0.0896999    | 0.022499809 |
| 14         | rs11628713    | 0.210432  | 0.170931     | 0.022499809 |
| 18         | rs7231282     | 0.292115  | 0.248125     | 0.022499809 |
| 3          | rs7631170     | 0.351986  | 0.303828     | 0.022512013 |
| 1          | rs2576235     | 0.21223   | 0.257746     | 0.022524225 |
| 16         | rs4407079     | 0.489209  | 0.437735     | 0.022524225 |
| 1          | rs10924577    | 0.203237  | 0.164505     | 0.022536443 |
| 3          | rs7631593     | 0.374552  | 0.426431     | 0.022536443 |
| 11         | rs6590937     | 0.0878136 | 0.0621594    | 0.022536443 |
| 4          | rs11724809    | 0.331541  | 0.382112     | 0.022548668 |
| 6          | rs9501885     | 0.112903  | 0.0832766    | 0.0225609   |
| 10         | rs2255030     | 0.428058  | 0.480252     | 0.0225609   |
| 10         | rs11187161    | 0.141577  | 0.181431     | 0.0225609   |
| 1          | rs859725      | 0.202509  | 0.247446     | 0.022573138 |
| 2          | rs1609470     | 0.103943  | 0.139126     | 0.022573138 |
| 5          | rs464881      | 0.505376  | 0.454189     | 0.022573138 |
| 5          | rs11747250    | 0.256272  | 0.304562     | 0.022573138 |
| 9          | rs10733261    | 0.263441  | 0.219911     | 0.022573138 |
| 11         | rs2511345     | 0.158273  | 0.199251     | 0.022573138 |
| 1          | rs451171      | 0.399642  | 0.450767     | 0.022585384 |
| 4          | rs970046      | 0.257194  | 0.305357     | 0.022585384 |
| 13         | rs9575421     | 0.367384  | 0.418454     | 0.022585384 |
| 4          | rs6845027     | 0.34767   | 0.398842     | 0.022597636 |
| 1          | rs11118428    | 0.132616  | 0.171438     | 0.022609896 |
| 2          | rs1607331     | 0.275986  | 0.324991     | 0.022609896 |
| 5          | rs1428007     | 0.229391  | 0.275792     | 0.022609896 |
| 6          | rs13210587    | 0.444444  | 0.393125     | 0.022609896 |
| 20         | rs1156958     | 0.206093  | 0.250681     | 0.022609896 |
| 21         | rs378108      | 0.530466  | 0.478209     | 0.022609896 |
| 1          | rs10917434    | 0.302158  | 0.352129     | 0.022622162 |
| 4          | rs871541      | 0.3213    | 0.274838     | 0.022622162 |
| 6          | rs927340      | 0.134892  | 0.174328     | 0.022622162 |
| 13         | rs7985120     | 0.270609  | 0.319095     | 0.022622162 |
| 8          | rs1064556     | 0.0698925 | 0.0473595    | 0.022634435 |
| 1          | rs12129026    | 0.512545  | 0.460858     | 0.022646715 |
| 6          | rs12664069    | 0.298913  | 0.253497     | 0.022646715 |
| 2          | rs4497835     | 0.266187  | 0.313525     | 0.022659002 |
| 2          | rs10166032    | 0.247292  | 0.294549     | 0.022659002 |

Table DS2: All SNPs tested for association (RDC SABP vs. controls) with the Cochran-Armitage trend test and significant at the p=0.05 threshold.

| chromosome | SNP           | MAF_cases | MAF_controls | p_value     |
|------------|---------------|-----------|--------------|-------------|
| 3          | SNP_A-1833513 | 0.173835  | 0.138178     | 0.022659002 |
| 4          | rs11728028    | 0.0989209 | 0.071794     | 0.022659002 |
| 5          | rs3117725     | 0.406475  | 0.356022     | 0.022659002 |
| 1          | rs10779702    | 0.399642  | 0.349607     | 0.022671296 |
| 2          | rs13397724    | 0.144404  | 0.18439      | 0.022671296 |
| 3          | rs17759069    | 0.157706  | 0.123509     | 0.022671296 |
| 5          | rs2059796     | 0.379928  | 0.43188      | 0.022671296 |
| 5          | rs267293      | 0.0860215 | 0.0607556    | 0.022683597 |
| 13         | rs913908      | 0.175627  | 0.218473     | 0.022683597 |
| 17         | rs3883317     | 0.0967742 | 0.070017     | 0.022683597 |
| 18         | rs9954646     | 0.252688  | 0.299898     | 0.022683597 |
| 1          | rs7534239     | 0.510753  | 0.458717     | 0.022708219 |
| 5          | rs17283841    | 0.25448   | 0.212287     | 0.022708219 |
| 1          | rs773618      | 0.306452  | 0.35668      | 0.022720541 |
| 2          | rs6715390     | 0.235612  | 0.194653     | 0.022720541 |
| 2          | rs12694415    | 0.363309  | 0.415159     | 0.022720541 |
| 6          | rs9368922     | 0.21147   | 0.171609     | 0.022720541 |
| 8          | rs6991723     | 0.415771  | 0.467484     | 0.022720541 |
| 11         | rs1787102     | 0.33871   | 0.38904      | 0.022720541 |
| 19         | rs10853928    | 0.485663  | 0.434901     | 0.022720541 |
| 20         | rs362616      | 0.134409  | 0.173995     | 0.022720541 |
| 3          | rs1317402     | 0.11413   | 0.151107     | 0.022732869 |
| 3          | rs7632904     | 0.0913978 | 0.065121     | 0.022732869 |
| 5          | rs12716433    | 0.147482  | 0.11431      | 0.022732869 |
| 7          | rs2694933     | 0.47491   | 0.424046     | 0.022732869 |
| 2          | rs6758995     | 0.258993  | 0.21594      | 0.022745204 |
| 9          | rs10869041    | 0.223827  | 0.182469     | 0.022745204 |
| 9          | rs16922089    | 0.246403  | 0.293597     | 0.022745204 |
| 9          | rs962396      | 0.314748  | 0.268982     | 0.022745204 |
| 12         | rs1499909     | 0.356631  | 0.308663     | 0.022745204 |
| 14         | rs11157928    | 0.225806  | 0.185242     | 0.022745204 |
| 1          | rs2790622     | 0.177419  | 0.140348     | 0.022757547 |
| 5          | rs399760      | 0.320789  | 0.274106     | 0.022757547 |
| 3          | rs2886980     | 0.399642  | 0.349966     | 0.022769896 |
| 5          | rs331717      | 0.361511  | 0.312564     | 0.022769896 |
| 11         | rs11023707    | 0.240072  | 0.28686      | 0.022769896 |
| 12         | rs10861779    | 0.250896  | 0.208049     | 0.022769896 |
| 6          | rs794609      | 0.143369  | 0.183879     | 0.022782252 |
| 7          | rs699485      | 0.494624  | 0.443023     | 0.022782252 |
| 2          | rs757920      | 0.168459  | 0.210392     | 0.022794615 |
| 4          | rs10805288    | 0.353047  | 0.402863     | 0.022794615 |
| 5          | rs1466054     | 0.0869565 | 0.120137     | 0.022794615 |
| 5          | rs28014       | 0.25448   | 0.302076     | 0.022794615 |
| 5          | rs987280      | 0.541219  | 0.488578     | 0.022794615 |
| 9          | rs4740377     | 0.22043   | 0.179898     | 0.022794615 |
| 2          | rs4281947     | 0.342294  | 0.295431     | 0.022806985 |
| 5          | rs970999      | 0.120939  | 0.158687     | 0.022806985 |
| 8          | rs10100191    | 0.155914  | 0.121424     | 0.022806985 |
| 2          | rs17010743    | 0.0971223 | 0.131812     | 0.022819363 |
| 15         | rs12909509    | 0.33213   | 0.284763     | 0.022819363 |
| 5          | rs13189655    | 0.232975  | 0.279557     | 0.022831747 |
| 11         | rs10790557    | 0.455036  | 0.404023     | 0.022831747 |



Table DS2: All SNPs tested for association (RDC SABP vs. controls) with the Cochran-Armitage trend test and significant at the p=0.05 threshold.

| chromosome | SNP        | MAF_cases | MAF_controls | p_value     |
|------------|------------|-----------|--------------|-------------|
| 15         | rs10519250 | 0.284946  | 0.333958     | 0.022831747 |
| 16         | rs3743807  | 0.18638   | 0.148791     | 0.022831747 |
| 6          | rs6911094  | 0.0376344 | 0.0622018    | 0.022844138 |
| 11         | rs4393297  | 0.426523  | 0.376192     | 0.022844138 |
| 2          | rs6739409  | 0.546595  | 0.494545     | 0.022856536 |
| 2          | rs16852600 | 0.311828  | 0.265257     | 0.022856536 |
| 20         | rs2024799  | 0.108303  | 0.0797818    | 0.022856536 |
| 4          | rs4833207  | 0.0896057 | 0.123255     | 0.022881352 |
| 8          | rs2469522  | 0.181004  | 0.224079     | 0.022881352 |
| 11         | rs2071461  | 0.233813  | 0.280409     | 0.022881352 |
| 15         | rs16973148 | 0.102151  | 0.0742254    | 0.022881352 |
| 1          | rs260519   | 0.32554   | 0.375811     | 0.022893771 |
| 1          | rs17121978 | 0.0430108 | 0.0686542    | 0.022893771 |
| 2          | rs17789375 | 0.31362   | 0.267632     | 0.022893771 |
| 2          | rs1523305  | 0.447842  | 0.499829     | 0.022893771 |
| 2          | rs10497241 | 0.274194  | 0.322768     | 0.022893771 |
| 3          | rs12107971 | 0.292115  | 0.340886     | 0.022893771 |
| 5          | rs6890248  | 0.370968  | 0.321915     | 0.022893771 |
| 4          | rs6551565  | 0.327957  | 0.378494     | 0.022906197 |
| 5          | rs2183463  | 0.535842  | 0.484146     | 0.022906197 |
| 6          | rs9405509  | 0.0555556 | 0.0837312    | 0.022906197 |
| 6          | rs10498670 | 0.121864  | 0.159625     | 0.022906197 |
| 14         | rs7148983  | 0.111111  | 0.0820565    | 0.022906197 |
| 2          | rs11904079 | 0.165468  | 0.207525     | 0.02291863  |
| 3          | rs2288370  | 0.323741  | 0.37419      | 0.02291863  |
| 11         | rs11235843 | 0.0806452 | 0.11287      | 0.02291863  |
| 5          | rs392077   | 0.320789  | 0.274199     | 0.02293107  |
| 2          | rs6745656  | 0.507168  | 0.455058     | 0.022943517 |
| 3          | rs1866298  | 0.143369  | 0.110297     | 0.022943517 |
| 4          | rs12649426 | 0.526882  | 0.474464     | 0.022943517 |
| 8          | rs1460165  | 0.202509  | 0.163655     | 0.022943517 |
| 9          | rs10115168 | 0.233813  | 0.192373     | 0.022943517 |
| 15         | rs4641721  | 0.375451  | 0.42638      | 0.022943517 |
| 2          | rs4954438  | 0.464029  | 0.412266     | 0.022955971 |
| 5          | rs1991520  | 0.222222  | 0.267881     | 0.022955971 |
| 12         | rs770738   | 0.389892  | 0.441658     | 0.022955971 |
| 6          | rs7749433  | 0.303957  | 0.258609     | 0.022968432 |
| 9          | rs4877866  | 0.215827  | 0.26167      | 0.022968432 |
| 13         | rs6561072  | 0.448029  | 0.397069     | 0.022968432 |
| 4          | rs7681368  | 0.149281  | 0.190225     | 0.0229809   |
| 1          | rs12120656 | 0.397482  | 0.348568     | 0.022993375 |
| 14         | rs1959993  | 0.0752688 | 0.0518064    | 0.022993375 |
| 18         | rs17717617 | 0.292115  | 0.247187     | 0.022993375 |
| 20         | rs2268922  | 0.329749  | 0.380198     | 0.022993375 |
| 5          | rs890970   | 0.523381  | 0.472061     | 0.023005857 |
| 6          | rs673410   | 0.22043   | 0.266269     | 0.023005857 |
| 13         | rs9543129  | 0.249104  | 0.295911     | 0.023005857 |
| 15         | rs4886922  | 0.0770609 | 0.0532675    | 0.023005857 |
| 11         | rs11040016 | 0.335125  | 0.385442     | 0.023030841 |
| 9          | rs10820259 | 0.247312  | 0.294448     | 0.023043345 |
| 6          | rs7773485  | 0.177419  | 0.220177     | 0.023055855 |
| 10         | rs1898096  | 0.132616  | 0.172061     | 0.023055855 |

Table DS2: All SNPs tested for association (RDC SABP vs. controls) with the Cochran-Armitage trend test and significant at the p=0.05 threshold.

| chromosome | SNP        | MAF_cases | MAF_controls | p_value     |
|------------|------------|-----------|--------------|-------------|
| 12         | rs11175622 | 0.0896057 | 0.0637355    | 0.023055855 |
| 3          | rs9822053  | 0.112903  | 0.150085     | 0.023068372 |
| 4          | rs17608192 | 0.116487  | 0.0873422    | 0.023068372 |
| 3          | rs347128   | 0.392086  | 0.343154     | 0.023080896 |
| 8          | rs6994146  | 0.111511  | 0.0824532    | 0.023080896 |
| 8          | rs4395860  | 0.379928  | 0.33106      | 0.023080896 |
| 13         | rs1343804  | 0.249104  | 0.295811     | 0.023080896 |
| 21         | rs2155605  | 0.415771  | 0.365758     | 0.023080896 |
| 2          | rs7568933  | 0.277978  | 0.23339      | 0.023093427 |
| 3          | rs12489521 | 0.241935  | 0.20075      | 0.023093427 |
| 7          | rs12702682 | 0.279783  | 0.328157     | 0.023093427 |
| 13         | rs9301196  | 0.353261  | 0.403204     | 0.023093427 |
| 3          | rs9834435  | 0.18638   | 0.229564     | 0.023105965 |
| 4          | rs4374667  | 0.271739  | 0.31953      | 0.023105965 |
| 20         | rs6091793  | 0.145161  | 0.184946     | 0.023105965 |
| 1          | rs238098   | 0.469424  | 0.4182       | 0.023118511 |
| 4          | rs478179   | 0.292115  | 0.247275     | 0.023118511 |
| 13         | rs7993437  | 0.249104  | 0.295842     | 0.023118511 |
| 14         | rs175490   | 0.514337  | 0.46256      | 0.023118511 |
| 15         | rs11574495 | 0.435484  | 0.487381     | 0.023118511 |
| 11         | rs10769895 | 0.543165  | 0.491488     | 0.023131063 |
| 13         | rs314690   | 0.302867  | 0.352199     | 0.023131063 |
| 14         | rs4900237  | 0.136201  | 0.103642     | 0.023131063 |
| 18         | rs2096823  | 0.444444  | 0.496426     | 0.023131063 |
| 3          | rs1403910  | 0.408602  | 0.35797      | 0.023143622 |
| 8          | rs16875066 | 0.169675  | 0.134117     | 0.023143622 |
| 13         | rs7327101  | 0.116906  | 0.0871199    | 0.023143622 |
| 21         | rs879894   | 0.401079  | 0.352319     | 0.023143622 |
| 2          | rs3109146  | 0.315412  | 0.268812     | 0.023156189 |
| 5          | rs262851   | 0.146953  | 0.113969     | 0.023156189 |
| 8          | rs6986887  | 0.130824  | 0.168712     | 0.023156189 |
| 12         | rs10841420 | 0.225806  | 0.185242     | 0.023156189 |
| 2          | rs1453125  | 0.31362   | 0.363373     | 0.023168762 |
| 2          | rs7593777  | 0.342294  | 0.294479     | 0.023168762 |
| 6          | rs2753136  | 0.177419  | 0.220613     | 0.023168762 |
| 8          | rs13273889 | 0.451087  | 0.503753     | 0.023168762 |
| 12         | rs1496212  | 0.273381  | 0.229785     | 0.023168762 |
| 12         | rs17039588 | 0.247312  | 0.205211     | 0.023168762 |
| 13         | rs309433   | 0.276978  | 0.325307     | 0.023168762 |
| 1          | rs607407   | 0.281362  | 0.330269     | 0.023181343 |
| 2          | rs12614960 | 0.327338  | 0.280164     | 0.023181343 |
| 10         | rs10906138 | 0.317204  | 0.27121      | 0.023181343 |
| 10         | rs3011382  | 0.47491   | 0.423772     | 0.023181343 |
| 12         | rs7134917  | 0.469534  | 0.418114     | 0.023181343 |
| 14         | rs10133111 | 0.197133  | 0.159549     | 0.023193931 |
| 2          | rs2953175  | 0.28853   | 0.337249     | 0.023206526 |
| 13         | rs11147611 | 0.377256  | 0.429107     | 0.023206526 |
| 5          | rs4921164  | 0.258065  | 0.214578     | 0.023219128 |
| 6          | rs2496292  | 0.301075  | 0.350528     | 0.023219128 |
| 11         | rs12222164 | 0.291367  | 0.34101      | 0.023219128 |
| 11         | rs7949313  | 0.375899  | 0.326213     | 0.023219128 |
| 1          | rs9425886  | 0.53405   | 0.482295     | 0.023231737 |

Table DS2: All SNPs tested for association (RDC SABP vs. controls) with the Cochran-Armitage trend test and significant at the p=0.05 threshold.

| chromosome | SNP        | MAF_cases | MAF_controls | p_value     |
|------------|------------|-----------|--------------|-------------|
| 1          | rs6428586  | 0.421147  | 0.370995     | 0.023231737 |
| 1          | rs1494373  | 0.155914  | 0.12129      | 0.023231737 |
| 1          | rs2795395  | 0.0519713 | 0.079809     | 0.023231737 |
| 3          | rs7649846  | 0.207885  | 0.252472     | 0.023231737 |
| 4          | rs11725389 | 0.336918  | 0.387564     | 0.023231737 |
| 13         | rs9520682  | 0.405018  | 0.456403     | 0.023231737 |
| 2          | rs1653780  | 0.415162  | 0.365201     | 0.023244353 |
| 4          | rs6536921  | 0.15233   | 0.118529     | 0.023244353 |
| 13         | rs1020684  | 0.268817  | 0.31719      | 0.023256976 |
| 5          | rs1479560  | 0.105735  | 0.141301     | 0.023269606 |
| 7          | rs6465877  | 0.207581  | 0.167975     | 0.023269606 |
| 21         | rs975184   | 0.268817  | 0.317081     | 0.023269606 |
| 2          | rs10173996 | 0.0665468 | 0.0969945    | 0.023282244 |
| 4          | rs7685043  | 0.247312  | 0.205281     | 0.023282244 |
| 5          | rs1567339  | 0.205036  | 0.166211     | 0.023282244 |
| 14         | rs12100866 | 0.0896057 | 0.123255     | 0.023282244 |
| 3          | rs17031374 | 0.0896057 | 0.12304      | 0.023294888 |
| 10         | rs789970   | 0.358423  | 0.409571     | 0.023294888 |
| 18         | rs8094453  | 0.22482   | 0.184219     | 0.023294888 |
| 1          | rs720972   | 0.451439  | 0.502903     | 0.02330754  |
| 2          | rs9784022  | 0.268817  | 0.22546      | 0.02330754  |
| 6          | rs2753137  | 0.177419  | 0.220558     | 0.023320199 |
| 11         | rs1195962  | 0.507168  | 0.455071     | 0.023332865 |
| 1          | rs12138067 | 0.121864  | 0.0913118    | 0.023345538 |
| 5          | rs13179136 | 0.125899  | 0.163543     | 0.023345538 |
| 13         | rs17534263 | 0.0683453 | 0.098873     | 0.023345538 |
| 17         | rs2856206  | 0.183453  | 0.226994     | 0.023345538 |
| 1          | rs4926547  | 0.27957   | 0.327821     | 0.023358218 |
| 4          | rs1347700  | 0.526882  | 0.474617     | 0.023358218 |
| 13         | rs1028671  | 0.192446  | 0.236277     | 0.023358218 |
| 4          | rs7659413  | 0.467509  | 0.415955     | 0.023370905 |
| 6          | rs17072830 | 0.103943  | 0.0763203    | 0.023370905 |
| 6          | rs3127196  | 0.430108  | 0.379428     | 0.023370905 |
| 8          | rs12680363 | 0.118705  | 0.0888359    | 0.023370905 |
| 5          | rs2962041  | 0.0842294 | 0.0595563    | 0.0233836   |
| 6          | rs9404372  | 0.185252  | 0.147801     | 0.0233836   |
| 8          | rs1508086  | 0.400722  | 0.452251     | 0.0233836   |
| 15         | rs11633431 | 0.388889  | 0.440021     | 0.0233836   |
| 2          | rs1879147  | 0.258065  | 0.305414     | 0.023396301 |
| 12         | rs11059698 | 0.17446   | 0.138283     | 0.023396301 |
| 19         | rs4805298  | 0.546931  | 0.49522      | 0.023396301 |
| 22         | rs383391   | 0.0791367 | 0.111149     | 0.023396301 |
| 3          | rs6795956  | 0.112903  | 0.150034     | 0.02340901  |
| 11         | rs955019   | 0.350719  | 0.401332     | 0.02340901  |
| 13         | rs11618716 | 0.401079  | 0.452843     | 0.02340901  |
| 18         | rs1261112  | 0.143369  | 0.111111     | 0.02340901  |
| 5          | rs151800   | 0.305054  | 0.259139     | 0.023421726 |
| 10         | rs2251062  | 0.395307  | 0.346337     | 0.023421726 |
| 15         | rs17596793 | 0.0752688 | 0.0522998    | 0.023421726 |
| 3          | rs13080035 | 0.429856  | 0.482283     | 0.023434449 |
| 5          | rs4419568  | 0.460432  | 0.409447     | 0.023434449 |
| 6          | rs9272346  | 0.437276  | 0.386789     | 0.023434449 |

Table DS2: All SNPs tested for association (RDC SABP vs. controls) with the Cochran-Armitage trend test and significant at the p=0.05 threshold.

| chromosome | SNP           | MAF_cases | MAF_controls | p_value     |
|------------|---------------|-----------|--------------|-------------|
| 6          | rs476366      | 0.386691  | 0.438501     | 0.023434449 |
| 11         | rs10769616    | 0.430108  | 0.481601     | 0.023434449 |
| 13         | SNP_A-1882199 | 0.415468  | 0.365417     | 0.023447179 |
| 18         | rs11151084    | 0.173835  | 0.138113     | 0.023447179 |
| 22         | rs8136206     | 0.159498  | 0.200545     | 0.023447179 |
| 6          | rs6933344     | 0.0376344 | 0.0619891    | 0.023459917 |
| 8          | rs11993442    | 0.153986  | 0.195126     | 0.023459917 |
| 13         | rs1020685     | 0.268817  | 0.317127     | 0.023459917 |
| 5          | rs10065159    | 0.275986  | 0.324702     | 0.023472662 |
| 8          | rs2680606     | 0.099278  | 0.0722089    | 0.023472662 |
| 15         | rs2412781     | 0.253623  | 0.300102     | 0.023472662 |
| 5          | rs7718472     | 0.410072  | 0.462036     | 0.023485413 |
| 6          | rs2396829     | 0.413669  | 0.364147     | 0.023485413 |
| 14         | rs12588812    | 0.0806452 | 0.0563308    | 0.023485413 |
| 15         | rs7164437     | 0.100358  | 0.0728635    | 0.023485413 |
| 22         | rs17657174    | 0.281362  | 0.236878     | 0.023485413 |
| 4          | rs11737218    | 0.267986  | 0.223756     | 0.023498172 |
| 4          | rs2597455     | 0.397849  | 0.349063     | 0.023498172 |
| 7          | rs6463774     | 0.0791367 | 0.0549488    | 0.023498172 |
| 19         | rs6509283     | 0.516187  | 0.464517     | 0.023498172 |
| 22         | rs5749087     | 0.282374  | 0.237551     | 0.023498172 |
| 1          | rs7521429     | 0.229391  | 0.275886     | 0.023510939 |
| 5          | rs1847042     | 0.0395683 | 0.0644172    | 0.023510939 |
| 7          | rs12533905    | 0.22043   | 0.1803       | 0.023510939 |
| 7          | rs4612282     | 0.218412  | 0.178169     | 0.023510939 |
| 8          | rs891540      | 0.367384  | 0.417971     | 0.023510939 |
| 1          | rs12129036    | 0.342294  | 0.391698     | 0.023523712 |
| 19         | rs8109787     | 0.306452  | 0.355658     | 0.023523712 |
| 21         | rs1571733     | 0.109319  | 0.145997     | 0.023523712 |
| 5          | rs1860059     | 0.166667  | 0.131731     | 0.023536492 |
| 9          | rs7350197     | 0.247312  | 0.294178     | 0.023536492 |
| 20         | rs6121844     | 0.0698925 | 0.0473595    | 0.023536492 |
| 15         | rs220027      | 0.370504  | 0.421205     | 0.02354928  |
| 7          | rs4612246     | 0.192446  | 0.154802     | 0.023562075 |
| 1          | rs233112      | 0.345324  | 0.394925     | 0.023574877 |
| 3          | rs17415202    | 0.111111  | 0.147309     | 0.023574877 |
| 6          | rs6901441     | 0.472924  | 0.421816     | 0.023574877 |
| 6          | rs11155055    | 0.240143  | 0.198432     | 0.023574877 |
| 11         | rs723077      | 0.543011  | 0.491147     | 0.023587687 |
| 1          | rs2375803     | 0.208633  | 0.170133     | 0.023600503 |
| 1          | rs3843304     | 0.28853   | 0.337249     | 0.023600503 |
| 5          | rs4700425     | 0.284946  | 0.240709     | 0.023600503 |
| 8          | rs7827685     | 0.426523  | 0.375936     | 0.023600503 |
| 11         | rs2355017     | 0.218638  | 0.264215     | 0.023600503 |
| 14         | rs8012593     | 0.444444  | 0.39349      | 0.023600503 |
| 2          | rs10182522    | 0.25448   | 0.212462     | 0.023626158 |
| 5          | rs10045122    | 0.138989  | 0.106717     | 0.023626158 |
| 1          | rs4657213     | 0.185921  | 0.22842      | 0.023638997 |
| 1          | rs6694102     | 0.370504  | 0.322658     | 0.023638997 |
| 13         | rs9545302     | 0.378136  | 0.3297       | 0.023638997 |
| 14         | rs17741591    | 0.52509   | 0.474188     | 0.023638997 |
| 8          | rs10503664    | 0.187726  | 0.150444     | 0.023651842 |

Table DS2: All SNPs tested for association (RDC SABP vs. controls) with the Cochran-Armitage trend test and significant at the p=0.05 threshold.

| chromosome | SNP        | MAF_cases | MAF_controls | p_value     |
|------------|------------|-----------|--------------|-------------|
| 8          | rs12155722 | 0.0591398 | 0.088105     | 0.023651842 |
| 11         | rs2741774  | 0.435484  | 0.487551     | 0.023651842 |
| 14         | rs2057369  | 0.241935  | 0.200443     | 0.023651842 |
| 3          | rs6794337  | 0.428315  | 0.480586     | 0.023664695 |
| 5          | rs905097   | 0.370968  | 0.322207     | 0.023664695 |
| 7          | rs17167462 | 0.120504  | 0.0905525    | 0.023664695 |
| 9          | rs1934735  | 0.181004  | 0.22402      | 0.023664695 |
| 17         | rs16942361 | 0.0878136 | 0.0625641    | 0.023664695 |
| 7          | rs17551064 | 0.125899  | 0.164278     | 0.023690422 |
| 15         | rs6493083  | 0.253597  | 0.299829     | 0.023690422 |
| 6          | rs4256438  | 0.430108  | 0.481948     | 0.023703297 |
| 14         | rs447600   | 0.40681   | 0.458063     | 0.023703297 |
| 3          | rs4327395  | 0.366906  | 0.318957     | 0.023716178 |
| 9          | rs2209440  | 0.42446   | 0.476328     | 0.023716178 |
| 14         | rs7148830  | 0.241935  | 0.289294     | 0.023716178 |
| 15         | rs4774381  | 0.144404  | 0.183555     | 0.023716178 |
| 15         | rs8032461  | 0.208633  | 0.253413     | 0.023716178 |
| 18         | rs10502913 | 0.27957   | 0.235765     | 0.023716178 |
| 3          | rs10513283 | 0.244604  | 0.202491     | 0.023729067 |
| 5          | rs1479561  | 0.105735  | 0.141178     | 0.023729067 |
| 9          | rs4842092  | 0.280576  | 0.328567     | 0.023729067 |
| 4          | rs6449005  | 0.379928  | 0.330607     | 0.023741964 |
| 7          | rs758937   | 0.141577  | 0.181756     | 0.023754867 |
| 11         | rs10835398 | 0.40681   | 0.457936     | 0.023754867 |
| 13         | rs1577406  | 0.306859  | 0.26124      | 0.023754867 |
| 11         | rs10895041 | 0.18638   | 0.148943     | 0.023767778 |
| 7          | rs2343295  | 0.270609  | 0.318863     | 0.023793622 |
| 10         | rs12161672 | 0.200717  | 0.162462     | 0.023793622 |
| 2          | rs918352   | 0.270609  | 0.318166     | 0.023806554 |
| 4          | rs767652   | 0.0860215 | 0.061221     | 0.023806554 |
| 9          | rs10820255 | 0.247312  | 0.294068     | 0.023806554 |
| 1          | rs2926484  | 0.197842  | 0.242084     | 0.023819494 |
| 2          | rs2885116  | 0.225806  | 0.185393     | 0.023819494 |
| 3          | rs4311168  | 0.209386  | 0.16957      | 0.023819494 |
| 6          | rs2814811  | 0.451613  | 0.400511     | 0.023819494 |
| 10         | rs10490898 | 0.315412  | 0.269322     | 0.023819494 |
| 1          | rs1334125  | 0.523381  | 0.472374     | 0.023832442 |
| 11         | rs657405   | 0.344086  | 0.296347     | 0.023832442 |
| 16         | rs7187762  | 0.421147  | 0.371463     | 0.023832442 |
| 2          | rs13398137 | 0.0412186 | 0.066712     | 0.023845396 |
| 7          | rs39395    | 0.411871  | 0.463058     | 0.023845396 |
| 8          | rs9298166  | 0.311828  | 0.26628      | 0.023845396 |
| 10         | rs7094883  | 0.385305  | 0.436627     | 0.023845396 |
| 19         | rs1284521  | 0.111111  | 0.14748      | 0.023845396 |
| 2          | rs16985453 | 0.443431  | 0.494708     | 0.023858358 |
| 5          | rs300329   | 0.221223  | 0.180626     | 0.023858358 |
| 3          | rs1522270  | 0.349462  | 0.301842     | 0.023871327 |
| 5          | rs7730020  | 0.299283  | 0.348041     | 0.023871327 |
| 11         | rs1994214  | 0.496416  | 0.445352     | 0.023871327 |
| 2          | rs17048092 | 0.034296  | 0.0577383    | 0.023884304 |
| 2          | rs17326398 | 0.408273  | 0.460293     | 0.023884304 |
| 4          | rs300906   | 0.195341  | 0.157698     | 0.023884304 |

Table DS2: All SNPs tested for association (RDC SABP vs. controls) with the Cochran-Armitage trend test and significant at the p=0.05 threshold.

| chromosome | SNP        | MAF_cases | MAF_controls | p_value     |
|------------|------------|-----------|--------------|-------------|
| 15         | rs989547   | 0.530576  | 0.478705     | 0.023884304 |
| 3          | rs1492035  | 0.482079  | 0.430811     | 0.023897288 |
| 6          | rs10949437 | 0.329749  | 0.282698     | 0.023897288 |
| 6          | rs914349   | 0.394265  | 0.34491      | 0.023897288 |
| 8          | rs764738   | 0.345878  | 0.297883     | 0.023897288 |
| 9          | rs10809928 | 0.376344  | 0.327827     | 0.023897288 |
| 12         | rs10843573 | 0.349462  | 0.302147     | 0.023897288 |
| 13         | rs2390913  | 0.181655  | 0.224983     | 0.023897288 |
| 18         | rs8090010  | 0.170251  | 0.212802     | 0.023897288 |
| 5          | rs4958160  | 0.102518  | 0.137496     | 0.023910279 |
| 5          | rs2962522  | 0.433692  | 0.384026     | 0.023910279 |
| 5          | rs10068944 | 0.116487  | 0.0874531    | 0.023910279 |
| 6          | rs7773293  | 0.232975  | 0.19257      | 0.023910279 |
| 7          | rs2190010  | 0.217626  | 0.177683     | 0.023910279 |
| 14         | rs2214965  | 0.361511  | 0.412176     | 0.023910279 |
| 2          | rs6718488  | 0.266187  | 0.313649     | 0.023923277 |
| 14         | rs2358785  | 0.449821  | 0.501704     | 0.023923277 |
| 7          | rs10256513 | 0.37276   | 0.42385      | 0.023936283 |
| 8          | rs7006936  | 0.175627  | 0.218473     | 0.023936283 |
| 10         | rs11239832 | 0.16129   | 0.126149     | 0.023936283 |
| 11         | rs1783925  | 0.341727  | 0.295191     | 0.023936283 |
| 10         | rs11000542 | 0.259857  | 0.30671      | 0.023949296 |
| 12         | rs11177680 | 0.0501792 | 0.0768052    | 0.023962317 |
| 4          | rs1425628  | 0.28442   | 0.332992     | 0.023975344 |
| 5          | rs6886783  | 0.417266  | 0.469016     | 0.023975344 |
| 18         | rs4800466  | 0.437276  | 0.488594     | 0.023975344 |
| 5          | rs1651058  | 0.107914  | 0.143759     | 0.023988379 |
| 7          | rs799971   | 0.200717  | 0.244289     | 0.023988379 |
| 9          | rs1492592  | 0.247312  | 0.293967     | 0.023988379 |
| 13         | rs9553425  | 0.283154  | 0.238428     | 0.023988379 |
| 15         | rs1234805  | 0.371841  | 0.32379      | 0.023988379 |
| 20         | rs461863   | 0.385305  | 0.336233     | 0.023988379 |
| 1          | rs4838890  | 0.458781  | 0.40858      | 0.024001422 |
| 5          | rs12657433 | 0.111111  | 0.0823108    | 0.024001422 |
| 20         | rs6069909  | 0.336918  | 0.289779     | 0.024001422 |
| 5          | rs9293330  | 0.410394  | 0.462036     | 0.024014472 |
| 5          | rs12520809 | 0.505376  | 0.4547       | 0.024014472 |
| 9          | rs10976368 | 0.326165  | 0.37615      | 0.024014472 |
| 18         | rs12456284 | 0.27957   | 0.235865     | 0.024014472 |
| 1          | rs459160   | 0.0701439 | 0.0481722    | 0.024027529 |
| 1          | rs731360   | 0.143369  | 0.110354     | 0.024027529 |
| 7          | rs2700300  | 0.22482   | 0.184534     | 0.024027529 |
| 7          | rs7787946  | 0.387097  | 0.438501     | 0.024027529 |
| 21         | rs427991   | 0.519713  | 0.468346     | 0.024027529 |
| 10         | rs2249698  | 0.154676  | 0.195097     | 0.024040594 |
| 14         | rs7161385  | 0.388087  | 0.339078     | 0.024053666 |
| 18         | rs7237387  | 0.109712  | 0.145513     | 0.024053666 |
| 1          | rs2795396  | 0.0537634 | 0.0819421    | 0.024066745 |
| 9          | rs10976369 | 0.326165  | 0.376192     | 0.024066745 |
| 9          | rs3737152  | 0.078853  | 0.0550068    | 0.024066745 |
| 16         | rs2908899  | 0.453405  | 0.402555     | 0.024066745 |
| 18         | rs4327121  | 0.0878136 | 0.120995     | 0.024066745 |

Table DS2: All SNPs tested for association (RDC SABP vs. controls) with the Cochran-Armitage trend test and significant at the p=0.05 threshold.

| chromosome | SNP        | MAF_cases | MAF_controls | p_value     |
|------------|------------|-----------|--------------|-------------|
| 1          | rs17512269 | 0.277778  | 0.233992     | 0.024079832 |
| 2          | rs16865045 | 0.0842294 | 0.116354     | 0.024079832 |
| 2          | rs17457136 | 0.12724   | 0.0965599    | 0.024079832 |
| 3          | rs1320162  | 0.114695  | 0.151091     | 0.024079832 |
| 2          | rs17033012 | 0.0645161 | 0.0941437    | 0.024092926 |
| 9          | rs11788620 | 0.18638   | 0.229458     | 0.024092926 |
| 14         | rs11621718 | 0.212996  | 0.257757     | 0.024092926 |
| 1          | rs3125887  | 0.368705  | 0.319761     | 0.024106027 |
| 2          | rs10165981 | 0.176259  | 0.140444     | 0.024106027 |
| 5          | rs6896953  | 0.410394  | 0.461997     | 0.024106027 |
| 7          | rs6970151  | 0.12724   | 0.165188     | 0.024106027 |
| 12         | rs216905   | 0.280576  | 0.237031     | 0.024106027 |
| 1          | rs2220728  | 0.278777  | 0.326864     | 0.024119136 |
| 11         | rs769149   | 0.154122  | 0.119973     | 0.024119136 |
| 16         | rs3024585  | 0.516245  | 0.463969     | 0.024119136 |
| 16         | rs11640435 | 0.4319    | 0.381301     | 0.024119136 |
| 18         | rs17521158 | 0.311828  | 0.361641     | 0.024119136 |
| 2          | rs10932513 | 0.266187  | 0.313585     | 0.024132252 |
| 3          | rs7620792  | 0.138489  | 0.106133     | 0.024132252 |
| 4          | rs2309710  | 0.431655  | 0.381601     | 0.024132252 |
| 7          | rs39745    | 0.157706  | 0.19775      | 0.024132252 |
| 10         | rs12357206 | 0.428315  | 0.480566     | 0.024132252 |
| 17         | rs4968920  | 0.100358  | 0.134845     | 0.024132252 |
| 20         | rs2749951  | 0.433453  | 0.484833     | 0.024145376 |
| 3          | rs1548188  | 0.240143  | 0.198569     | 0.024158507 |
| 6          | rs17573187 | 0.18638   | 0.149506     | 0.024158507 |
| 12         | rs4763845  | 0.356631  | 0.407218     | 0.024158507 |
| 2          | rs10191557 | 0.408602  | 0.359263     | 0.024171646 |
| 7          | rs17401797 | 0.526978  | 0.475273     | 0.024171646 |
| 9          | rs10991016 | 0.438628  | 0.489601     | 0.024171646 |
| 11         | rs1471759  | 0.272401  | 0.22879      | 0.024171646 |
| 18         | rs7506207  | 0.34657   | 0.299148     | 0.024171646 |
| 1          | rs12133535 | 0.116487  | 0.153152     | 0.024184792 |
| 1          | rs7549482  | 0.160072  | 0.125725     | 0.024184792 |
| 1          | rs7538087  | 0.355596  | 0.406239     | 0.024184792 |
| 1          | rs9428826  | 0.175627  | 0.138936     | 0.024184792 |
| 4          | rs1509306  | 0.107527  | 0.142784     | 0.024184792 |
| 4          | rs1540470  | 0.52518   | 0.473065     | 0.024184792 |
| 4          | rs10006992 | 0.415771  | 0.467132     | 0.024197945 |
| 8          | rs17117611 | 0.381295  | 0.431857     | 0.024197945 |
| 2          | rs4234124  | 0.28853   | 0.336853     | 0.024211106 |
| 10         | rs2985519  | 0.31295   | 0.361775     | 0.024211106 |
| 2          | rs7594498  | 0.0806452 | 0.056501     | 0.024224274 |
| 6          | rs6933014  | 0.356631  | 0.30967      | 0.024224274 |
| 7          | rs4722438  | 0.415468  | 0.466417     | 0.024224274 |
| 8          | rs17319073 | 0.0448029 | 0.0704057    | 0.024224274 |
| 18         | rs528801   | 0.249097  | 0.296183     | 0.024224274 |
| 21         | rs2075906  | 0.165468  | 0.130583     | 0.024224274 |
| 3          | rs13090351 | 0.394265  | 0.344792     | 0.024237449 |
| 4          | rs1809992  | 0.317204  | 0.271224     | 0.024237449 |
| 5          | rs3846609  | 0.460573  | 0.409928     | 0.024237449 |
| 2          | rs4854302  | 0.413978  | 0.364147     | 0.024250633 |

Table DS2: All SNPs tested for association (RDC SABP vs. controls) with the Cochran-Armitage trend test and significant at the p=0.05 threshold.

| chromosome | SNP           | MAF_cases | MAF_controls | p_value     |
|------------|---------------|-----------|--------------|-------------|
| 3          | rs13074575    | 0.0647482 | 0.0944976    | 0.024250633 |
| 9          | rs16928717    | 0.195341  | 0.238938     | 0.024250633 |
| 9          | rs2026587     | 0.0827338 | 0.115897     | 0.024250633 |
| 10         | rs3816699     | 0.109319  | 0.145315     | 0.024250633 |
| 12         | rs1353460     | 0.132616  | 0.101706     | 0.024250633 |
| 12         | rs17614926    | 0.249104  | 0.206673     | 0.024250633 |
| 19         | rs2097982     | 0.143369  | 0.110485     | 0.024250633 |
| 3          | rs2290610     | 0.308244  | 0.357411     | 0.024263823 |
| 14         | rs8021587     | 0.188172  | 0.150442     | 0.024263823 |
| 2          | SNP_A-2163379 | 0.0967742 | 0.131346     | 0.024277021 |
| 17         | rs216459      | 0.388489  | 0.439249     | 0.024277021 |
| 1          | rs4143025     | 0.360215  | 0.411815     | 0.024290226 |
| 3          | rs9814881     | 0.210432  | 0.171667     | 0.024290226 |
| 3          | rs814756      | 0.176259  | 0.218259     | 0.024290226 |
| 5          | rs17434434    | 0.102518  | 0.137743     | 0.024290226 |
| 5          | rs11960137    | 0.137993  | 0.106376     | 0.024290226 |
| 6          | rs9393605     | 0.38172   | 0.432584     | 0.024290226 |
| 12         | rs747906      | 0.100358  | 0.0731084    | 0.024290226 |
| 9          | rs10963391    | 0.408273  | 0.359066     | 0.024303439 |
| 3          | rs1502618     | 0.464158  | 0.412888     | 0.024316659 |
| 5          | rs4865747     | 0.154122  | 0.119973     | 0.024316659 |
| 9          | rs4742554     | 0.440647  | 0.390119     | 0.024316659 |
| 9          | rs12554306    | 0.175627  | 0.217399     | 0.024316659 |
| 14         | rs1568404     | 0.516187  | 0.464748     | 0.024316659 |
| 10         | rs10824825    | 0.274545  | 0.323279     | 0.024329887 |
| 13         | rs1360812     | 0.456989  | 0.406069     | 0.024343122 |
| 2          | rs1921251     | 0.228417  | 0.188245     | 0.024356365 |
| 2          | rs4663721     | 0.0593525 | 0.0883055    | 0.024356365 |
| 9          | rs10869430    | 0.383513  | 0.335037     | 0.024356365 |
| 3          | rs2724509     | 0.222222  | 0.182437     | 0.024369615 |
| 3          | rs1492036     | 0.482079  | 0.431005     | 0.024369615 |
| 20         | rs570376      | 0.0483871 | 0.0752725    | 0.024369615 |
| 2          | rs2082331     | 0.0557554 | 0.0840708    | 0.024382873 |
| 8          | rs6470126     | 0.521661  | 0.469635     | 0.024382873 |
| 3          | rs7628275     | 0.494565  | 0.444104     | 0.024396138 |
| 14         | rs10147424    | 0.277174  | 0.233572     | 0.024396138 |
| 18         | rs8095785     | 0.480287  | 0.429326     | 0.024396138 |
| 1          | rs17097780    | 0.0591398 | 0.0872826    | 0.024409411 |
| 8          | rs11166611    | 0.304659  | 0.354415     | 0.024409411 |
| 20         | rs6027482     | 0.225806  | 0.185943     | 0.024409411 |
| 2          | rs4519500     | 0.188172  | 0.150767     | 0.024422691 |
| 8          | rs4345596     | 0.505376  | 0.454019     | 0.024422691 |
| 2          | rs6753320     | 0.451439  | 0.400068     | 0.024435978 |
| 6          | rs17840186    | 0.078853  | 0.0546476    | 0.024435978 |
| 8          | rs7833057     | 0.160072  | 0.20133      | 0.024435978 |
| 14         | rs11850904    | 0.394265  | 0.445467     | 0.024435978 |
| 20         | rs6080334     | 0.370504  | 0.420954     | 0.024435978 |
| 21         | rs2835762     | 0.206093  | 0.167121     | 0.024435978 |
| 5          | rs17062854    | 0.130824  | 0.168256     | 0.024449273 |
| 4          | rs17620330    | 0.09319   | 0.0669628    | 0.024462576 |
| 5          | rs2972393     | 0.480216  | 0.42879      | 0.024462576 |
| 16         | rs7195330     | 0.297491  | 0.252386     | 0.024462576 |



Table DS2: All SNPs tested for association (RDC SABP vs. controls) with the Cochran-Armitage trend test and significant at the p=0.05 threshold.

| chromosome | SNP        | MAF_cases | MAF_controls | p_value     |
|------------|------------|-----------|--------------|-------------|
| 1          | rs10916711 | 0.382671  | 0.334016     | 0.024475886 |
| 2          | rs11563233 | 0.0467626 | 0.0731333    | 0.024475886 |
| 4          | rs7654137  | 0.103943  | 0.139305     | 0.024475886 |
| 6          | rs9401725  | 0.111913  | 0.0833902    | 0.024475886 |
| 11         | rs1280216  | 0.33871   | 0.388321     | 0.024475886 |
| 16         | rs17737220 | 0.235612  | 0.194208     | 0.024475886 |
| 4          | rs1546176  | 0.222222  | 0.267711     | 0.024489204 |
| 6          | rs3804498  | 0.0917266 | 0.0660538    | 0.024489204 |
| 8          | rs7831259  | 0.426523  | 0.376234     | 0.024489204 |
| 16         | rs6499142  | 0.467742  | 0.417547     | 0.024489204 |
| 13         | rs7139964  | 0.241007  | 0.288133     | 0.024502529 |
| 19         | rs175628   | 0.327957  | 0.378535     | 0.024502529 |
| 20         | rs1884137  | 0.132616  | 0.101328     | 0.024502529 |
| 21         | rs382816   | 0.519784  | 0.468484     | 0.024502529 |
| 18         | rs632912   | 0.115108  | 0.0859242    | 0.024515862 |
| 20         | rs2425764  | 0.217626  | 0.177732     | 0.024515862 |
| 2          | rs9989867  | 0.0719424 | 0.0495557    | 0.024529202 |
| 4          | rs2646320  | 0.503597  | 0.452162     | 0.024529202 |
| 13         | rs11148349 | 0.163669  | 0.205089     | 0.024529202 |
| 1          | rs2376018  | 0.207885  | 0.169679     | 0.02454255  |
| 1          | rs11582061 | 0.146209  | 0.113063     | 0.02454255  |
| 3          | rs9864910  | 0.18705   | 0.229721     | 0.02454255  |
| 4          | rs1420877  | 0.440647  | 0.491655     | 0.02454255  |
| 17         | rs883541   | 0.193548  | 0.236206     | 0.02454255  |
| 4          | rs7682828  | 0.272563  | 0.32015      | 0.024555905 |
| 5          | rs10900707 | 0.267025  | 0.314872     | 0.024555905 |
| 5          | rs11748238 | 0.431655  | 0.382283     | 0.024555905 |
| 6          | rs7746473  | 0.0949821 | 0.128664     | 0.024555905 |
| 9          | rs1537011  | 0.107527  | 0.14332      | 0.024555905 |
| 13         | rs386809   | 0.215054  | 0.259278     | 0.024555905 |
| 18         | rs11151086 | 0.374552  | 0.425017     | 0.024555905 |
| 2          | rs10932423 | 0.448029  | 0.397886     | 0.024569268 |
| 6          | rs7751379  | 0.31362   | 0.362955     | 0.024569268 |
| 12         | rs4237941  | 0.525362  | 0.474088     | 0.024569268 |
| 8          | rs2120473  | 0.295699  | 0.251107     | 0.024582638 |
| 3          | rs1966047  | 0.422939  | 0.373849     | 0.024609402 |
| 5          | rs11750771 | 0.132616  | 0.101776     | 0.024609402 |
| 6          | rs13215498 | 0.483755  | 0.432198     | 0.024609402 |
| 1          | rs3024505  | 0.198556  | 0.160696     | 0.024622795 |
| 11         | rs12286785 | 0.0645161 | 0.0941437    | 0.024622795 |
| 2          | rs1897911  | 0.453405  | 0.40361      | 0.024636195 |
| 21         | rs2142124  | 0.106115  | 0.078418     | 0.024636195 |
| 1          | rs481776   | 0.166065  | 0.207155     | 0.024649603 |
| 3          | rs12632454 | 0.409747  | 0.359748     | 0.024649603 |
| 4          | rs10518512 | 0.322581  | 0.276338     | 0.024649603 |
| 9          | rs10818097 | 0.304659  | 0.353202     | 0.024649603 |
| 6          | rs16895234 | 0.155914  | 0.121889     | 0.024663019 |
| 8          | rs9297357  | 0.24552   | 0.291681     | 0.024663019 |
| 17         | rs850622   | 0.292115  | 0.247359     | 0.024663019 |
| 6          | rs9321467  | 0.383513  | 0.334809     | 0.024676442 |
| 10         | rs4751296  | 0.385305  | 0.436308     | 0.024676442 |
| 12         | rs1561555  | 0.0812274 | 0.0574693    | 0.024676442 |

Table DS2: All SNPs tested for association (RDC SABP vs. controls) with the Cochran-Armitage trend test and significant at the p=0.05 threshold.

| chromosome | SNP        | MAF_cases | MAF_controls | p_value     |
|------------|------------|-----------|--------------|-------------|
| 1          | rs574053   | 0.123656  | 0.0933879    | 0.024689873 |
| 4          | rs7674135  | 0.172043  | 0.213556     | 0.024689873 |
| 6          | rs6910325  | 0.356631  | 0.309816     | 0.024689873 |
| 8          | rs2894493  | 0.130824  | 0.168143     | 0.024689873 |
| 18         | rs7230580  | 0.378136  | 0.329356     | 0.024689873 |
| 1          | rs10926557 | 0.156475  | 0.122188     | 0.024703312 |
| 5          | rs9324823  | 0.148746  | 0.115634     | 0.024703312 |
| 9          | rs17499507 | 0.228417  | 0.187628     | 0.024703312 |
| 13         | rs7991338  | 0.246403  | 0.293656     | 0.024703312 |
| 5          | rs1396484  | 0.204301  | 0.165928     | 0.024730212 |
| 10         | rs16909818 | 0.107527  | 0.142443     | 0.024730212 |
| 10         | rs10787774 | 0.324373  | 0.373765     | 0.024730212 |
| 4          | rs4693369  | 0.408602  | 0.358555     | 0.024743673 |
| 6          | rs6913089  | 0.0376344 | 0.0622867    | 0.024743673 |
| 8          | rs2980773  | 0.26259   | 0.219816     | 0.024743673 |
| 19         | rs1651801  | 0.482014  | 0.43057      | 0.024743673 |
| 5          | rs2301001  | 0.378136  | 0.428693     | 0.024757142 |
| 12         | rs7964939  | 0.0953237 | 0.068671     | 0.024757142 |
| 6          | rs9496646  | 0.301075  | 0.349404     | 0.024770618 |
| 9          | rs17782173 | 0.0967742 | 0.0700409    | 0.024770618 |
| 15         | rs7182797  | 0.100358  | 0.0730835    | 0.024770618 |
| 5          | rs11955470 | 0.0770609 | 0.0539433    | 0.024784103 |
| 10         | rs10904906 | 0.197133  | 0.159331     | 0.024784103 |
| 3          | rs10510597 | 0.21147   | 0.255703     | 0.024797594 |
| 11         | rs11224802 | 0.119134  | 0.0899453    | 0.024797594 |
| 11         | rs120434   | 0.514337  | 0.46302      | 0.024797594 |
| 12         | rs10467157 | 0.234767  | 0.280463     | 0.024797594 |
| 1          | rs4656862  | 0.119134  | 0.156485     | 0.024811094 |
| 5          | rs1428660  | 0.387097  | 0.338556     | 0.024811094 |
| 5          | rs7709822  | 0.19964   | 0.16201      | 0.024811094 |
| 10         | rs7070319  | 0.116487  | 0.154003     | 0.024811094 |
| 11         | rs11040338 | 0.367384  | 0.41695      | 0.024811094 |
| 13         | rs605695   | 0.0394265 | 0.0643952    | 0.024811094 |
| 14         | rs1158282  | 0.293907  | 0.342356     | 0.024811094 |
| 4          | rs7682994  | 0.125448  | 0.162125     | 0.024824601 |
| 5          | rs173587   | 0.433692  | 0.384497     | 0.024824601 |
| 9          | rs10972434 | 0.284173  | 0.240539     | 0.024824601 |
| 11         | rs11233474 | 0.203237  | 0.164794     | 0.024824601 |
| 13         | rs7982889  | 0.21147   | 0.172296     | 0.024824601 |
| 15         | rs7165051  | 0.358423  | 0.40954      | 0.024824601 |
| 7          | rs7793114  | 0.130824  | 0.16843      | 0.024838115 |
| 8          | rs1293320  | 0.37276   | 0.325375     | 0.024838115 |
| 11         | rs11020175 | 0.44086   | 0.390119     | 0.024838115 |
| 16         | rs4784368  | 0.24552   | 0.203855     | 0.024851638 |
| 2          | rs332068   | 0.297491  | 0.2523       | 0.024865167 |
| 3          | rs1492034  | 0.482079  | 0.431152     | 0.024865167 |
| 12         | rs1165669  | 0.306452  | 0.261572     | 0.024878705 |
| 20         | rs6084189  | 0.149281  | 0.189249     | 0.024878705 |
| 8          | rs2098885  | 0.0985663 | 0.132914     | 0.02489225  |
| 11         | rs7130751  | 0.465827  | 0.415416     | 0.02489225  |
| 13         | rs9535822  | 0.424731  | 0.475256     | 0.02489225  |
| 1          | rs2744750  | 0.331541  | 0.381512     | 0.024905803 |

Table DS2: All SNPs tested for association (RDC SABP vs. controls) with the Cochran-Armitage trend test and significant at the p=0.05 threshold.

| chromosome | SNP           | MAF_cases | MAF_controls | p_value     |
|------------|---------------|-----------|--------------|-------------|
| 2          | rs6714010     | 0.297491  | 0.252895     | 0.024905803 |
| 9          | rs2453552     | 0.215827  | 0.260655     | 0.024905803 |
| 16         | rs11644034    | 0.193548  | 0.236609     | 0.024905803 |
| 18         | rs12458824    | 0.417563  | 0.368188     | 0.024905803 |
| 4          | rs336298      | 0.223022  | 0.268301     | 0.024919364 |
| 9          | rs700782      | 0.215054  | 0.259796     | 0.024919364 |
| 11         | rs10902006    | 0.526978  | 0.475971     | 0.024919364 |
| 11         | rs6590        | 0.0806452 | 0.112381     | 0.024919364 |
| 1          | rs17127838    | 0.225806  | 0.186328     | 0.024932932 |
| 5          | rs11135178    | 0.0842294 | 0.116695     | 0.024932932 |
| 6          | rs9503642     | 0.213262  | 0.173654     | 0.024932932 |
| 7          | rs12707128    | 0.333333  | 0.383174     | 0.024946508 |
| 9          | rs4743577     | 0.301075  | 0.349352     | 0.024946508 |
| 11         | SNP_A-4198155 | 0.0323741 | 0.055404     | 0.024946508 |
| 15         | rs11636064    | 0.503597  | 0.452779     | 0.024946508 |
| 17         | rs8069182     | 0.373646  | 0.324872     | 0.024946508 |
| 1          | rs1416095     | 0.405018  | 0.355877     | 0.024960091 |
| 2          | rs334137      | 0.225806  | 0.185671     | 0.024960091 |
| 4          | rs17528160    | 0.267025  | 0.22385      | 0.024960091 |
| 16         | rs7201414     | 0.232975  | 0.192229     | 0.024960091 |
| 2          | rs10181042    | 0.455036  | 0.404705     | 0.024973682 |
| 6          | rs4467744     | 0.167266  | 0.132298     | 0.024973682 |
| 3          | rs13092094    | 0.136691  | 0.175307     | 0.025000888 |
| 9          | rs17213494    | 0.234767  | 0.280771     | 0.025000888 |
| 1          | rs12121403    | 0.517921  | 0.46711      | 0.025014502 |
| 2          | rs2868435     | 0.159498  | 0.199626     | 0.025014502 |
| 2          | rs4663834     | 0.283154  | 0.239441     | 0.025014502 |
| 5          | rs4593303     | 0.204301  | 0.166042     | 0.025014502 |
| 7          | rs4267        | 0.114695  | 0.0860014    | 0.025014502 |
| 4          | rs4508957     | 0.330935  | 0.380594     | 0.025028124 |
| 7          | rs7811128     | 0.335125  | 0.384275     | 0.025028124 |
| 21         | rs1735937     | 0.222222  | 0.182407     | 0.025028124 |
| 2          | rs207942      | 0.446237  | 0.396181     | 0.025041754 |
| 3          | rs6550440     | 0.208633  | 0.252727     | 0.025041754 |
| 5          | rs1345732     | 0.16426   | 0.129857     | 0.025041754 |
| 7          | rs2099205     | 0.0503597 | 0.0773301    | 0.025041754 |
| 8          | rs7813143     | 0.388489  | 0.339578     | 0.025041754 |
| 10         | rs16932949    | 0.132616  | 0.171667     | 0.025041754 |
| 10         | rs7097572     | 0.544803  | 0.493526     | 0.025041754 |
| 16         | rs12917871    | 0.147482  | 0.186989     | 0.025041754 |
| 16         | rs4782271     | 0.137993  | 0.176881     | 0.025041754 |
| 3          | rs6767825     | 0.207885  | 0.252045     | 0.025055391 |
| 16         | rs9933832     | 0.361511  | 0.313395     | 0.025055391 |
| 10         | rs11009897    | 0.351254  | 0.401296     | 0.025069036 |
| 15         | rs1465511     | 0.290323  | 0.339693     | 0.025069036 |
| 4          | rs17002416    | 0.0376344 | 0.0619031    | 0.025082689 |
| 4          | rs17071251    | 0.249104  | 0.206985     | 0.025082689 |
| 9          | rs10963233    | 0.188172  | 0.231267     | 0.025082689 |
| 13         | rs7330265     | 0.231183  | 0.19029      | 0.025082689 |
| 14         | rs4465541     | 0.0716846 | 0.10242      | 0.025082689 |
| 5          | rs2624459     | 0.37276   | 0.4233       | 0.02509635  |
| 8          | rs4503102     | 0.34767   | 0.300579     | 0.02509635  |

Table DS2: All SNPs tested for association (RDC SABP vs. controls) with the Cochran-Armitage trend test and significant at the p=0.05 threshold.

| chromosome | SNP           | MAF_cases | MAF_controls | p_value     |
|------------|---------------|-----------|--------------|-------------|
| 17         | rs3744226     | 0.413978  | 0.364985     | 0.02509635  |
| 2          | rs1356738     | 0.258065  | 0.304845     | 0.025110018 |
| 6          | rs12664516    | 0.213262  | 0.173706     | 0.025110018 |
| 12         | rs7311050     | 0.0537634 | 0.0813161    | 0.025110018 |
| 9          | rs2780203     | 0.0663082 | 0.0963506    | 0.025123694 |
| 12         | rs17018731    | 0.146953  | 0.114388     | 0.025123694 |
| 17         | rs8067711     | 0.426523  | 0.376065     | 0.025123694 |
| 2          | rs6750111     | 0.444444  | 0.495063     | 0.025137378 |
| 15         | rs17674023    | 0.0896057 | 0.0641811    | 0.025137378 |
| 17         | rs17606460    | 0.196043  | 0.239509     | 0.025137378 |
| 3          | rs4677698     | 0.40681   | 0.458234     | 0.025151069 |
| 9          | rs2025882     | 0.302867  | 0.351245     | 0.025151069 |
| 21         | rs13433446    | 0.0913978 | 0.0657895    | 0.025151069 |
| 5          | rs11950379    | 0.417563  | 0.468771     | 0.025164768 |
| 6          | rs1472641     | 0.460573  | 0.41002      | 0.025164768 |
| 8          | rs7841785     | 0.131295  | 0.100307     | 0.025164768 |
| 8          | rs4282579     | 0.295699  | 0.343558     | 0.025164768 |
| 19         | rs1520068     | 0.27957   | 0.328109     | 0.025164768 |
| 1          | rs4428890     | 0.0806452 | 0.112098     | 0.025178475 |
| 5          | rs1011220     | 0.388489  | 0.438803     | 0.025178475 |
| 8          | rs7826222     | 0.200717  | 0.162121     | 0.025178475 |
| 11         | rs1077858     | 0.401434  | 0.3523       | 0.025178475 |
| 20         | rs2567609     | 0.496416  | 0.445674     | 0.025178475 |
| 2          | rs1437689     | 0.189964  | 0.233651     | 0.02519219  |
| 19         | rs4802906     | 0.133094  | 0.101805     | 0.02519219  |
| 4          | rs3775940     | 0.370968  | 0.420416     | 0.025205912 |
| 4          | rs1527328     | 0.44086   | 0.391104     | 0.025205912 |
| 11         | rs7129133     | 0.222222  | 0.182221     | 0.025205912 |
| 11         | rs1280214     | 0.33871   | 0.388037     | 0.025205912 |
| 15         | rs16963037    | 0.166667  | 0.131767     | 0.025205912 |
| 20         | rs963576      | 0.0967742 | 0.131005     | 0.025205912 |
| 1          | rs5177        | 0.366906  | 0.417519     | 0.025219643 |
| 1          | rs7538578     | 0.421147  | 0.47208      | 0.025219643 |
| 1          | rs7413154     | 0.370968  | 0.421268     | 0.025219643 |
| 1          | rs12136759    | 0.419355  | 0.369973     | 0.025219643 |
| 10         | rs7919851     | 0.47482   | 0.424217     | 0.025219643 |
| 15         | rs990526      | 0.277778  | 0.233675     | 0.025219643 |
| 1          | rs11119499    | 0.207885  | 0.25196      | 0.025233381 |
| 2          | rs10197121    | 0.295699  | 0.344399     | 0.025233381 |
| 19         | rs2246914     | 0.243728  | 0.202523     | 0.025233381 |
| 4          | SNP_A-1797970 | 0.37276   | 0.325383     | 0.025247126 |
| 4          | rs1567497     | 0.152878  | 0.11938      | 0.025247126 |
| 5          | rs2188500     | 0.266187  | 0.314076     | 0.025247126 |
| 8          | rs270791      | 0.360215  | 0.410283     | 0.025247126 |
| 8          | rs2911752     | 0.129032  | 0.166156     | 0.025247126 |
| 11         | rs1512355     | 0.261649  | 0.218665     | 0.025247126 |
| 11         | rs1559854     | 0.266187  | 0.223074     | 0.02526088  |
| 13         | rs9561694     | 0.269784  | 0.316973     | 0.02526088  |
| 20         | rs4810210     | 0.0485612 | 0.0756131    | 0.02526088  |
| 5          | rs10491280    | 0.111111  | 0.147379     | 0.025274641 |
| 5          | rs888644      | 0.12724   | 0.096686     | 0.025274641 |
| 8          | rs7009936     | 0.16129   | 0.201332     | 0.025274641 |

Table DS2: All SNPs tested for association (RDC SABP vs. controls) with the Cochran-Armitage trend test and significant at the p=0.05 threshold.

| chromosome | SNP           | MAF_cases | MAF_controls | p_value     |
|------------|---------------|-----------|--------------|-------------|
| 9          | rs10986849    | 0.350719  | 0.40109      | 0.025274641 |
| 1          | rs6690583     | 0.222222  | 0.182004     | 0.02528841  |
| 1          | rs10754020    | 0.356115  | 0.406505     | 0.02528841  |
| 7          | rs17173681    | 0.240143  | 0.286469     | 0.02528841  |
| 1          | rs12117214    | 0.446237  | 0.396558     | 0.025302187 |
| 10         | rs3904887     | 0.225806  | 0.185709     | 0.025302187 |
| 3          | rs2316685     | 0.482014  | 0.431105     | 0.025315972 |
| 14         | rs8022049     | 0.340502  | 0.293756     | 0.025315972 |
| 3          | rs1878428     | 0.351254  | 0.304259     | 0.025329764 |
| 6          | rs228439      | 0.410394  | 0.361746     | 0.025329764 |
| 3          | rs795437      | 0.5       | 0.448858     | 0.025343565 |
| 4          | rs2726648     | 0.403226  | 0.354124     | 0.025343565 |
| 6          | rs6910043     | 0.178058  | 0.219877     | 0.025343565 |
| 7          | rs3094895     | 0.189964  | 0.152404     | 0.025343565 |
| 18         | rs17228566    | 0.289568  | 0.245572     | 0.025343565 |
| 7          | rs17173682    | 0.240143  | 0.286421     | 0.025357373 |
| 11         | rs7930322     | 0.0341727 | 0.0573379    | 0.025357373 |
| 1          | rs1000050     | 0.177419  | 0.14176      | 0.025385012 |
| 4          | rs4241863     | 0.127698  | 0.165072     | 0.025385012 |
| 7          | rs9641850     | 0.316547  | 0.365634     | 0.025385012 |
| 15         | rs11634135    | 0.451613  | 0.502045     | 0.025385012 |
| 18         | rs7242115     | 0.105735  | 0.0779332    | 0.025385012 |
| 2          | rs12993413    | 0.0860215 | 0.11908      | 0.025398844 |
| 5          | rs1396486     | 0.204301  | 0.166099     | 0.025398844 |
| 10         | rs3125329     | 0.341727  | 0.294418     | 0.025398844 |
| 14         | rs2681768     | 0.367384  | 0.417801     | 0.025398844 |
| 1          | rs2462012     | 0.123656  | 0.0935264    | 0.025412683 |
| 2          | rs7603747     | 0.188849  | 0.152011     | 0.025412683 |
| 11         | rs7943358     | 0.274194  | 0.231018     | 0.025412683 |
| 6          | rs12194111    | 0.34767   | 0.397239     | 0.02542653  |
| 6          | rs7764771     | 0.166667  | 0.131857     | 0.02542653  |
| 9          | rs10974769    | 0.109319  | 0.0809199    | 0.02542653  |
| 9          | rs7048827     | 0.274194  | 0.321356     | 0.02542653  |
| 12         | rs17813371    | 0.152878  | 0.192806     | 0.02542653  |
| 1          | rs3811387     | 0.516129  | 0.465417     | 0.025440385 |
| 11         | rs10769168    | 0.0752688 | 0.0517359    | 0.025440385 |
| 13         | rs1536134     | 0.25      | 0.296082     | 0.025440385 |
| 20         | rs6111621     | 0.111913  | 0.147762     | 0.025440385 |
| 1          | rs6540802     | 0.09319   | 0.0672913    | 0.025454248 |
| 11         | rs10893605    | 0.16129   | 0.201602     | 0.025454248 |
| 11         | rs4753821     | 0.366906  | 0.417376     | 0.025454248 |
| 14         | rs17198805    | 0.201439  | 0.163144     | 0.025454248 |
| 15         | rs293385      | 0.421147  | 0.47155      | 0.025454248 |
| 22         | rs7289890     | 0.184588  | 0.14758      | 0.025454248 |
| 1          | rs912759      | 0.44964   | 0.500854     | 0.025468119 |
| 1          | rs572609      | 0.0483871 | 0.0747616    | 0.025468119 |
| 3          | rs11130012    | 0.133094  | 0.101808     | 0.025468119 |
| 8          | rs6980601     | 0.353047  | 0.306435     | 0.025468119 |
| 8          | rs10093908    | 0.413978  | 0.465077     | 0.025468119 |
| 12         | rs17722632    | 0.28853   | 0.336286     | 0.025468119 |
| 13         | SNP_A-1879746 | 0.188172  | 0.231346     | 0.025468119 |
| 14         | rs10150417    | 0.379928  | 0.331744     | 0.025468119 |

Table DS2: All SNPs tested for association (RDC SABP vs. controls) with the Cochran-Armitage trend test and significant at the p=0.05 threshold.

| chromosome | SNP           | MAF_cases | MAF_controls | p_value     |
|------------|---------------|-----------|--------------|-------------|
| 1          | rs7536712     | 0.451439  | 0.502557     | 0.025481998 |
| 1          | rs2391383     | 0.0971223 | 0.0704801    | 0.025481998 |
| 1          | rs10158309    | 0.433692  | 0.484113     | 0.025481998 |
| 6          | rs959687      | 0.18638   | 0.229302     | 0.025481998 |
| 7          | rs1008038     | 0.285971  | 0.334185     | 0.025481998 |
| 11         | rs7949022     | 0.170863  | 0.212995     | 0.025481998 |
| 9          | rs11791135    | 0.234767  | 0.280621     | 0.025495884 |
| 11         | rs3922        | 0.446237  | 0.396558     | 0.025495884 |
| 12         | rs10506375    | 0.260791  | 0.21842      | 0.025495884 |
| 14         | rs8008996     | 0.207885  | 0.251532     | 0.025495884 |
| 1          | rs618675      | 0.155914  | 0.196349     | 0.025509778 |
| 3          | rs2029591     | 0.129032  | 0.167121     | 0.025509778 |
| 5          | rs840390      | 0.0938628 | 0.128109     | 0.025509778 |
| 6          | rs2180030     | 0.451613  | 0.401091     | 0.025509778 |
| 20         | rs17502794    | 0.115108  | 0.08606      | 0.025509778 |
| 5          | rs903420      | 0.125899  | 0.163262     | 0.025523681 |
| 12         | rs11107901    | 0.274194  | 0.231412     | 0.025523681 |
| 13         | rs1410643     | 0.218638  | 0.264395     | 0.025523681 |
| 15         | rs536313      | 0.253597  | 0.298907     | 0.025523681 |
| 19         | rs3730976     | 0.327957  | 0.378157     | 0.025523681 |
| 22         | rs7290139     | 0.428315  | 0.379387     | 0.025523681 |
| 1          | rs2038901     | 0.369176  | 0.320735     | 0.025537591 |
| 3          | rs4677697     | 0.40681   | 0.458092     | 0.025537591 |
| 5          | rs32880       | 0.304659  | 0.260143     | 0.025551508 |
| 8          | rs4495475     | 0.189964  | 0.23381      | 0.025551508 |
| 1          | rs10802051    | 0.218638  | 0.263704     | 0.025565434 |
| 1          | rs12122495    | 0.446043  | 0.396387     | 0.025565434 |
| 2          | rs2271333     | 0.526978  | 0.476986     | 0.025565434 |
| 4          | rs17314203    | 0.403226  | 0.353504     | 0.025565434 |
| 7          | rs6461425     | 0.155914  | 0.122404     | 0.025565434 |
| 14         | rs1958217     | 0.379496  | 0.331516     | 0.025565434 |
| 16         | rs17693924    | 0.293907  | 0.342195     | 0.025565434 |
| 2          | rs16865067    | 0.0842294 | 0.115935     | 0.025579368 |
| 2          | rs11896869    | 0.399642  | 0.350426     | 0.025579368 |
| 5          | rs6450206     | 0.0685921 | 0.0984332    | 0.025579368 |
| 6          | rs1474963     | 0.177419  | 0.21957      | 0.025579368 |
| 16         | rs4587975     | 0.146953  | 0.186138     | 0.025579368 |
| 19         | SNP_A-1892174 | 0.102151  | 0.0749574    | 0.025579368 |
| 1          | rs16826818    | 0.225632  | 0.270634     | 0.025593309 |
| 2          | rs6729754     | 0.146953  | 0.186435     | 0.025593309 |
| 3          | rs1031838     | 0.370968  | 0.421519     | 0.025593309 |
| 9          | rs7044154     | 0.182796  | 0.146337     | 0.025593309 |
| 11         | rs11602521    | 0.501792  | 0.451261     | 0.025593309 |
| 17         | rs740805      | 0.150538  | 0.117105     | 0.025593309 |
| 10         | rs10827405    | 0.351254  | 0.401226     | 0.025607259 |
| 9          | rs3015182     | 0.126354  | 0.0964493    | 0.025621216 |
| 1          | rs4233435     | 0.437276  | 0.488071     | 0.025649155 |
| 3          | rs842500      | 0.275986  | 0.232003     | 0.025649155 |
| 12         | rs7970203     | 0.179856  | 0.144244     | 0.025649155 |
| 6          | rs9460417     | 0.179211  | 0.143392     | 0.025663136 |
| 8          | rs7833804     | 0.308244  | 0.263032     | 0.025663136 |
| 20         | rs514706      | 0.336918  | 0.291042     | 0.025663136 |

Table DS2: All SNPs tested for association (RDC SABP vs. controls) with the Cochran-Armitage trend test and significant at the p=0.05 threshold.

| chromosome | SNP        | MAF_cases | MAF_controls | p_value     |
|------------|------------|-----------|--------------|-------------|
| 20         | rs643022   | 0.306452  | 0.26184      | 0.025663136 |
| 1          | rs11211414 | 0.283154  | 0.240116     | 0.025677125 |
| 1          | rs10918549 | 0.290323  | 0.338396     | 0.025677125 |
| 20         | rs2422707  | 0.478417  | 0.427524     | 0.025677125 |
| 9          | rs4542000  | 0.259857  | 0.21728      | 0.025691122 |
| 10         | rs2022103  | 0.177419  | 0.219229     | 0.025691122 |
| 6          | rs3857597  | 0.125448  | 0.0952949    | 0.025705126 |
| 10         | rs2010363  | 0.185252  | 0.228016     | 0.025705126 |
| 12         | rs2731272  | 0.492832  | 0.441547     | 0.025705126 |
| 1          | rs9660009  | 0.258065  | 0.304969     | 0.025719139 |
| 1          | rs10789368 | 0.543011  | 0.49165      | 0.025719139 |
| 8          | rs10088694 | 0.154122  | 0.120902     | 0.025719139 |
| 16         | rs11642397 | 0.304659  | 0.353152     | 0.025719139 |
| 2          | rs12623575 | 0.198925  | 0.160878     | 0.02573316  |
| 4          | rs4493502  | 0.48917   | 0.437798     | 0.02573316  |
| 6          | rs9462165  | 0.155914  | 0.196319     | 0.02573316  |
| 7          | rs7779245  | 0.123656  | 0.160696     | 0.02573316  |
| 8          | rs1424874  | 0.154676  | 0.194785     | 0.02573316  |
| 19         | rs171853   | 0.34      | 0.293426     | 0.02573316  |
| 3          | rs1979750  | 0.18705   | 0.229238     | 0.025747188 |
| 4          | rs12511966 | 0.129032  | 0.16661      | 0.025747188 |
| 7          | rs11977021 | 0.278777  | 0.235254     | 0.025747188 |
| 18         | rs9945468  | 0.247312  | 0.206063     | 0.025747188 |
| 3          | rs2675229  | 0.0698925 | 0.0997956    | 0.025761225 |
| 9          | rs10959870 | 0.0896057 | 0.122998     | 0.025761225 |
| 13         | rs9528038  | 0.270909  | 0.318724     | 0.025761225 |
| 14         | rs3790040  | 0.134892  | 0.172455     | 0.025761225 |
| 17         | rs6501685  | 0.143885  | 0.111642     | 0.025761225 |
| 9          | rs501434   | 0.43705   | 0.487201     | 0.025775269 |
| 16         | rs1123925  | 0.464029  | 0.414709     | 0.025775269 |
| 14         | rs8011611  | 0.317204  | 0.366553     | 0.025789322 |
| 6          | rs1044429  | 0.156475  | 0.122744     | 0.025803382 |
| 2          | rs12691894 | 0.255396  | 0.302318     | 0.025817451 |
| 6          | rs222450   | 0.145161  | 0.183663     | 0.025817451 |
| 8          | rs4875444  | 0.46595   | 0.415872     | 0.025817451 |
| 8          | rs1909023  | 0.146953  | 0.186371     | 0.025817451 |
| 5          | rs17166268 | 0.111111  | 0.147239     | 0.025831527 |
| 12         | rs7962483  | 0.261649  | 0.307627     | 0.025831527 |
| 22         | rs1033667  | 0.345878  | 0.298332     | 0.025831527 |
| 1          | rs16835155 | 0.107527  | 0.143369     | 0.025845611 |
| 7          | rs7790738  | 0.347122  | 0.396628     | 0.025845611 |
| 4          | rs7696450  | 0.170251  | 0.211119     | 0.025859704 |
| 5          | rs1452027  | 0.386691  | 0.338441     | 0.025859704 |
| 7          | rs1849672  | 0.168459  | 0.209639     | 0.025859704 |
| 9          | rs12000674 | 0.0663082 | 0.0959441    | 0.025859704 |
| 21         | rs8134523  | 0.148746  | 0.115962     | 0.025859704 |
| 17         | rs8074080  | 0.24552   | 0.204189     | 0.025873804 |
| 18         | rs508987   | 0.203237  | 0.246251     | 0.025873804 |
| 2          | rs7419564  | 0.21147   | 0.173424     | 0.025887912 |
| 3          | rs4681784  | 0.367384  | 0.320382     | 0.025887912 |
| 6          | rs9385301  | 0.105735  | 0.140668     | 0.025887912 |
| 7          | rs3113123  | 0.38172   | 0.334128     | 0.025887912 |

Table DS2: All SNPs tested for association (RDC SABP vs. controls) with the Cochran-Armitage trend test and significant at the p=0.05 threshold.

| chromosome | SNP        | MAF_cases | MAF_controls | p_value     |
|------------|------------|-----------|--------------|-------------|
| 4          | rs4835382  | 0.448029  | 0.39751      | 0.025902029 |
| 7          | rs6969899  | 0.331541  | 0.380839     | 0.025902029 |
| 9          | rs7025941  | 0.181655  | 0.145656     | 0.025902029 |
| 10         | rs6481942  | 0.225806  | 0.185841     | 0.025902029 |
| 11         | rs2860521  | 0.152878  | 0.192689     | 0.025902029 |
| 11         | rs1949885  | 0.449458  | 0.501024     | 0.025902029 |
| 12         | rs1684387  | 0.46223   | 0.411775     | 0.025902029 |
| 2          | rs6729353  | 0.480216  | 0.429717     | 0.025916153 |
| 3          | rs2695642  | 0.383513  | 0.434219     | 0.025916153 |
| 9          | rs17060403 | 0.0395683 | 0.0643952    | 0.025916153 |
| 5          | rs4921078  | 0.204301  | 0.166269     | 0.025930285 |
| 6          | rs2621383  | 0.433692  | 0.384103     | 0.025930285 |
| 10         | rs10824019 | 0.277778  | 0.23437      | 0.025930285 |
| 3          | rs155207   | 0.242806  | 0.201943     | 0.025944425 |
| 3          | rs11551405 | 0.24552   | 0.204468     | 0.025944425 |
| 7          | rs6583418  | 0.401079  | 0.352931     | 0.025944425 |
| 14         | rs1956533  | 0.396057  | 0.447189     | 0.025944425 |
| 1          | rs3125929  | 0.353047  | 0.305432     | 0.025958574 |
| 3          | rs12487050 | 0.326165  | 0.28013      | 0.025958574 |
| 6          | rs9365311  | 0.387097  | 0.437521     | 0.025958574 |
| 10         | rs10509645 | 0.302158  | 0.350375     | 0.025958574 |
| 10         | rs4611123  | 0.168459  | 0.209568     | 0.025958574 |
| 12         | rs11181556 | 0.197842  | 0.160532     | 0.025958574 |
| 12         | rs34580    | 0.172043  | 0.136627     | 0.025958574 |
| 10         | rs1674922  | 0.455197  | 0.405451     | 0.02597273  |
| 7          | rs1049334  | 0.107914  | 0.0799795    | 0.025986894 |
| 15         | rs7174236  | 0.24552   | 0.203988     | 0.025986894 |
| 2          | rs16866785 | 0.274368  | 0.230586     | 0.026001067 |
| 3          | rs267480   | 0.353047  | 0.403303     | 0.026001067 |
| 4          | rs11733293 | 0.365591  | 0.318569     | 0.026001067 |
| 5          | rs37575    | 0.378136  | 0.329642     | 0.026001067 |
| 5          | rs2279855  | 0.0701439 | 0.100136     | 0.026001067 |
| 5          | rs17098828 | 0.0985663 | 0.132343     | 0.026001067 |
| 10         | rs4962558  | 0.229242  | 0.189249     | 0.026001067 |
| 12         | rs3759187  | 0.103943  | 0.139353     | 0.026001067 |
| 20         | rs11696305 | 0.222222  | 0.182902     | 0.026001067 |
| 3          | rs352276   | 0.339928  | 0.390119     | 0.026015247 |
| 3          | rs9289218  | 0.508961  | 0.458248     | 0.026015247 |
| 4          | rs7684055  | 0.0340502 | 0.0567678    | 0.026015247 |
| 10         | rs10509415 | 0.31362   | 0.268039     | 0.026015247 |
| 13         | rs1333525  | 0.0394265 | 0.0635434    | 0.026015247 |
| 13         | rs9573440  | 0.315412  | 0.363543     | 0.026015247 |
| 4          | rs1437843  | 0.424731  | 0.374531     | 0.026029436 |
| 5          | rs6868264  | 0.366906  | 0.319145     | 0.026029436 |
| 1          | rs873448   | 0.200717  | 0.244281     | 0.026043632 |
| 1          | rs6698381  | 0.345878  | 0.395436     | 0.026043632 |
| 7          | rs11763010 | 0.33213   | 0.381682     | 0.026043632 |
| 16         | rs328345   | 0.355072  | 0.405143     | 0.026043632 |
| 18         | rs9962096  | 0.252688  | 0.298803     | 0.026043632 |
| 1          | rs259361   | 0.442652  | 0.392808     | 0.026072049 |
| 5          | rs40468    | 0.374552  | 0.327205     | 0.026072049 |
| 5          | rs10866726 | 0.308244  | 0.263239     | 0.026072049 |



Table DS2: All SNPs tested for association (RDC SABP vs. controls) with the Cochran-Armitage trend test and significant at the p=0.05 threshold.

| chromosome | SNP        | MAF_cases | MAF_controls | p_value     |
|------------|------------|-----------|--------------|-------------|
| 8          | rs1978661  | 0.241007  | 0.28681      | 0.026072049 |
| 8          | rs949449   | 0.116487  | 0.152929     | 0.026072049 |
| 2          | rs17026901 | 0.129496  | 0.0989441    | 0.02608627  |
| 15         | rs16973097 | 0.100719  | 0.0735746    | 0.02608627  |
| 5          | rs16870514 | 0.0430108 | 0.0681431    | 0.026100498 |
| 2          | rs12694794 | 0.16129   | 0.127514     | 0.026114735 |
| 8          | rs7015143  | 0.227599  | 0.272232     | 0.026114735 |
| 13         | rs724705   | 0.349638  | 0.302524     | 0.026114735 |
| 17         | rs7209653  | 0.327957  | 0.281697     | 0.026114735 |
| 3          | rs9809852  | 0.399642  | 0.449744     | 0.02612898  |
| 6          | rs9378629  | 0.480287  | 0.430746     | 0.02612898  |
| 8          | rs6988693  | 0.156475  | 0.196562     | 0.02612898  |
| 10         | rs7916058  | 0.193548  | 0.156335     | 0.02612898  |
| 11         | rs1627802  | 0.195341  | 0.157625     | 0.02612898  |
| 16         | rs9926618  | 0.359206  | 0.409199     | 0.02612898  |
| 21         | rs7281816  | 0.109319  | 0.144584     | 0.02612898  |
| 1          | rs12034657 | 0.0824373 | 0.113954     | 0.026143233 |
| 7          | rs3823523  | 0.460573  | 0.410252     | 0.026143233 |
| 16         | rs16960309 | 0.22482   | 0.185027     | 0.026143233 |
| 19         | rs10423679 | 0.102151  | 0.136519     | 0.026143233 |
| 5          | rs2114991  | 0.392473  | 0.344016     | 0.026157494 |
| 7          | rs6955290  | 0.261649  | 0.219208     | 0.026157494 |
| 8          | rs10098381 | 0.0433213 | 0.0682285    | 0.026157494 |
| 12         | rs11068274 | 0.403226  | 0.452837     | 0.026157494 |
| 6          | rs4708374  | 0.142086  | 0.181818     | 0.026171763 |
| 1          | rs17379833 | 0.320789  | 0.368958     | 0.02618604  |
| 2          | rs1105047  | 0.284946  | 0.241062     | 0.02618604  |
| 11         | rs2595455  | 0.439068  | 0.490296     | 0.02618604  |
| 16         | rs12446944 | 0.44086   | 0.390444     | 0.02618604  |
| 5          | rs7711326  | 0.356631  | 0.406474     | 0.026200325 |
| 6          | rs649395   | 0.19964   | 0.243101     | 0.026200325 |
| 7          | rs7792546  | 0.331541  | 0.38079      | 0.026200325 |
| 7          | rs7801166  | 0.106115  | 0.140471     | 0.026200325 |
| 13         | rs1859756  | 0.395683  | 0.347071     | 0.026200325 |
| 16         | rs2967284  | 0.326165  | 0.280504     | 0.026200325 |
| 18         | rs8082727  | 0.258065  | 0.304807     | 0.026200325 |
| 3          | rs9882210  | 0.197133  | 0.160313     | 0.026214618 |
| 5          | rs10039804 | 0.344086  | 0.393356     | 0.026214618 |
| 11         | rs10501924 | 0.209677  | 0.171545     | 0.026214618 |
| 1          | rs12117194 | 0.530466  | 0.479387     | 0.02622892  |
| 8          | rs12056740 | 0.415468  | 0.466154     | 0.02622892  |
| 9          | rs12344698 | 0.044964  | 0.070017     | 0.02622892  |
| 10         | rs2355638  | 0.228417  | 0.188586     | 0.02622892  |
| 11         | rs11228120 | 0.21223   | 0.173817     | 0.02622892  |
| 2          | rs2621978  | 0.195341  | 0.238241     | 0.026243229 |
| 3          | rs1719607  | 0.323741  | 0.277797     | 0.026243229 |
| 13         | rs1164139  | 0.136691  | 0.175699     | 0.026243229 |
| 15         | rs924551   | 0.0645161 | 0.093356     | 0.026243229 |
| 21         | rs11088961 | 0.28853   | 0.245065     | 0.026243229 |
| 2          | rs4670469  | 0.170863  | 0.135914     | 0.026257547 |
| 5          | rs190313   | 0.0555556 | 0.0829925    | 0.026257547 |
| 9          | rs4837521  | 0.30036   | 0.348315     | 0.026257547 |

Table DS2: All SNPs tested for association (RDC SABP vs. controls) with the Cochran-Armitage trend test and significant at the p=0.05 threshold.

| chromosome | SNP        | MAF_cases | MAF_controls | p_value     |
|------------|------------|-----------|--------------|-------------|
| 16         | rs1875205  | 0.231183  | 0.190704     | 0.026257547 |
| 18         | rs1217190  | 0.18638   | 0.229039     | 0.026257547 |
| 20         | rs6012080  | 0.0541516 | 0.0812883    | 0.026257547 |
| 4          | rs9683663  | 0.333333  | 0.287249     | 0.026271873 |
| 6          | rs9390095  | 0.301075  | 0.348909     | 0.026271873 |
| 8          | rs17079553 | 0.0752688 | 0.106071     | 0.026271873 |
| 11         | rs11232211 | 0.17446   | 0.139088     | 0.026271873 |
| 17         | rs2952283  | 0.184588  | 0.226808     | 0.026271873 |
| 19         | rs3817397  | 0.27957   | 0.327715     | 0.026271873 |
| 19         | rs4805273  | 0.136201  | 0.174335     | 0.026271873 |
| 21         | rs7282352  | 0.164875  | 0.130628     | 0.026271873 |
| 2          | rs759358   | 0.18705   | 0.150136     | 0.026286207 |
| 4          | rs1441062  | 0.295699  | 0.344282     | 0.026286207 |
| 7          | rs2190242  | 0.168459  | 0.209639     | 0.026286207 |
| 9          | rs3808746  | 0.108303  | 0.143929     | 0.026286207 |
| 13         | rs10508036 | 0.270609  | 0.227861     | 0.026286207 |
| 16         | rs1003341  | 0.197133  | 0.240034     | 0.026286207 |
| 2          | rs4894214  | 0.0305755 | 0.0531335    | 0.026300549 |
| 3          | rs496479   | 0.458781  | 0.409199     | 0.026300549 |
| 5          | rs10515588 | 0.157706  | 0.124447     | 0.026300549 |
| 6          | rs1472642  | 0.460573  | 0.410361     | 0.026300549 |
| 10         | rs793091   | 0.286738  | 0.334355     | 0.026300549 |
| 21         | rs229347   | 0.354839  | 0.404835     | 0.026300549 |
| 3          | rs9878953  | 0.134409  | 0.103072     | 0.026314899 |
| 8          | rs11779569 | 0.431408  | 0.481936     | 0.026314899 |
| 3          | rs7637711  | 0.143885  | 0.183072     | 0.026329257 |
| 3          | rs10513296 | 0.310036  | 0.265508     | 0.026329257 |
| 8          | rs10955409 | 0.447653  | 0.398123     | 0.026329257 |
| 13         | rs2875194  | 0.184588  | 0.147871     | 0.026329257 |
| 18         | rs17729447 | 0.240143  | 0.285982     | 0.026329257 |
| 12         | rs7963345  | 0.487455  | 0.436989     | 0.026343624 |
| 13         | rs9582391  | 0.155914  | 0.196149     | 0.026343624 |
| 7          | rs958404   | 0.331541  | 0.380701     | 0.026357998 |
| 14         | rs8015726  | 0.408602  | 0.359529     | 0.026357998 |
| 6          | rs9499580  | 0.415771  | 0.366803     | 0.026372381 |
| 9          | rs10818472 | 0.218638  | 0.263283     | 0.026372381 |
| 11         | rs12417545 | 0.336331  | 0.29013      | 0.026372381 |
| 12         | rs7298492  | 0.124549  | 0.094613     | 0.026372381 |
| 13         | rs17604461 | 0.0755396 | 0.0529552    | 0.026372381 |
| 1          | rs1570870  | 0.177419  | 0.21859      | 0.026386772 |
| 2          | rs1518784  | 0.146209  | 0.11432      | 0.026386772 |
| 9          | rs870186   | 0.438849  | 0.488749     | 0.026386772 |
| 12         | rs7299897  | 0.271583  | 0.319345     | 0.026386772 |
| 13         | rs7336862  | 0.329749  | 0.379686     | 0.026386772 |
| 10         | rs7069053  | 0.413978  | 0.365201     | 0.026401171 |
| 2          | rs1385430  | 0.172043  | 0.212947     | 0.026415578 |
| 5          | rs10042020 | 0.0521583 | 0.0789833    | 0.026415578 |
| 6          | rs6908010  | 0.505376  | 0.454871     | 0.026415578 |
| 1          | rs1764319  | 0.177419  | 0.218548     | 0.026429993 |
| 4          | rs10520320 | 0.0734767 | 0.103819     | 0.026429993 |
| 7          | rs7790881  | 0.24552   | 0.204189     | 0.026429993 |
| 7          | rs2348280  | 0.444444  | 0.495058     | 0.026429993 |

Table DS2: All SNPs tested for association (RDC SABP vs. controls) with the Cochran-Armitage trend test and significant at the p=0.05 threshold.

| chromosome | SNP           | MAF_cases | MAF_controls | p_value     |
|------------|---------------|-----------|--------------|-------------|
| 1          | rs913380      | 0.361511  | 0.3145       | 0.026444417 |
| 1          | rs12035880    | 0.219424  | 0.264435     | 0.026444417 |
| 1          | rs10863562    | 0.227599  | 0.187372     | 0.026444417 |
| 5          | rs32776       | 0.173835  | 0.21594      | 0.026444417 |
| 8          | rs4737999     | 0.239209  | 0.285032     | 0.026444417 |
| 10         | rs10995412    | 0.229242  | 0.189014     | 0.026444417 |
| 5          | rs1477281     | 0.102518  | 0.137432     | 0.026458849 |
| 7          | rs1369496     | 0.248201  | 0.207238     | 0.026458849 |
| 8          | rs12674548    | 0.12724   | 0.097208     | 0.026458849 |
| 1          | rs16854012    | 0.0539568 | 0.0813715    | 0.026473289 |
| 8          | rs12547632    | 0.310036  | 0.264656     | 0.026473289 |
| 14         | rs10483708    | 0.228417  | 0.273083     | 0.026473289 |
| 17         | rs4591205     | 0.0376344 | 0.0614782    | 0.026473289 |
| 22         | rs4819892     | 0.11828   | 0.15509      | 0.026473289 |
| 14         | rs8013489     | 0.317204  | 0.36636      | 0.026487737 |
| 21         | rs2838635     | 0.40681   | 0.456826     | 0.026487737 |
| 1          | rs9426541     | 0.342294  | 0.391943     | 0.026502193 |
| 16         | rs1531562     | 0.295699  | 0.251107     | 0.026502193 |
| 2          | rs7582080     | 0.252688  | 0.210831     | 0.026516657 |
| 6          | rs13203149    | 0.11828   | 0.0889193    | 0.026516657 |
| 6          | rs4716334     | 0.138489  | 0.176551     | 0.026516657 |
| 17         | rs11079884    | 0.0985663 | 0.132663     | 0.026516657 |
| 4          | rs1609116     | 0.469424  | 0.41925      | 0.02653113  |
| 5          | rs246664      | 0.0555556 | 0.082936     | 0.02653113  |
| 5          | rs248771      | 0.430108  | 0.38148      | 0.02653113  |
| 8          | rs2624076     | 0.145161  | 0.112662     | 0.02653113  |
| 8          | rs2981309     | 0.25448   | 0.300681     | 0.02653113  |
| 10         | rs7081821     | 0.0645161 | 0.0932377    | 0.02653113  |
| 11         | rs11225308    | 0.277778  | 0.234231     | 0.02653113  |
| 16         | rs2923140     | 0.410394  | 0.460334     | 0.02653113  |
| 2          | rs2244340     | 0.356631  | 0.405888     | 0.026545611 |
| 5          | rs257474      | 0.424731  | 0.375809     | 0.026545611 |
| 7          | rs6978512     | 0.331541  | 0.380457     | 0.026545611 |
| 8          | rs7014649     | 0.213262  | 0.174787     | 0.026545611 |
| 10         | rs16909797    | 0.109319  | 0.144149     | 0.026545611 |
| 11         | rs651853      | 0.0824373 | 0.114782     | 0.026545611 |
| 14         | SNP_A-4276631 | 0.0949821 | 0.0689714    | 0.026545611 |
| 14         | rs2210180     | 0.317204  | 0.366315     | 0.026545611 |
| 15         | rs951171      | 0.28777   | 0.335264     | 0.026545611 |
| 22         | rs6000533     | 0.521505  | 0.471229     | 0.026545611 |
| 2          | rs2345160     | 0.139785  | 0.108044     | 0.0265601   |
| 7          | rs9691916     | 0.447842  | 0.398536     | 0.0265601   |
| 20         | rs17747544    | 0.444444  | 0.495051     | 0.0265601   |
| 6          | rs7754964     | 0.449821  | 0.500511     | 0.026574598 |
| 11         | rs17615246    | 0.189964  | 0.152863     | 0.026574598 |
| 17         | rs3922495     | 0.197842  | 0.240886     | 0.026574598 |
| 21         | rs9977484     | 0.177419  | 0.142028     | 0.026574598 |
| 1          | rs997641      | 0.345878  | 0.298978     | 0.026589103 |
| 2          | rs7571233     | 0.507194  | 0.456078     | 0.026589103 |
| 9          | rs10817291    | 0.249104  | 0.295183     | 0.026589103 |
| 10         | rs867626      | 0.436823  | 0.487376     | 0.026589103 |
| 2          | rs6712089     | 0.239209  | 0.285009     | 0.026603617 |

Table DS2: All SNPs tested for association (RDC SABP vs. controls) with the Cochran-Armitage trend test and significant at the p=0.05 threshold.

| chromosome | SNP           | MAF_cases | MAF_controls | p_value     |
|------------|---------------|-----------|--------------|-------------|
| 6          | rs1240833     | 0.367273  | 0.31998      | 0.026603617 |
| 7          | rs17598306    | 0.100719  | 0.134923     | 0.026603617 |
| 9          | rs10858396    | 0.267025  | 0.224361     | 0.026603617 |
| 12         | rs4764008     | 0.0698925 | 0.100136     | 0.026603617 |
| 14         | rs2144042     | 0.192446  | 0.155419     | 0.026603617 |
| 3          | rs6788467     | 0.0866426 | 0.118682     | 0.026618139 |
| 10         | rs2305206     | 0.433692  | 0.483458     | 0.026618139 |
| 20         | rs6043283     | 0.469534  | 0.419816     | 0.026618139 |
| 1          | rs4838908     | 0.121864  | 0.158836     | 0.026632669 |
| 2          | rs1863071     | 0.170251  | 0.135094     | 0.026632669 |
| 9          | rs894241      | 0.044964  | 0.0706726    | 0.026632669 |
| 14         | rs1356843     | 0.367384  | 0.41732      | 0.026632669 |
| 18         | rs9962558     | 0.270609  | 0.317393     | 0.026632669 |
| 1          | rs11119552    | 0.284946  | 0.241732     | 0.026647208 |
| 3          | rs1996663     | 0.143369  | 0.182315     | 0.026647208 |
| 13         | rs2765320     | 0.143885  | 0.111225     | 0.026647208 |
| 14         | rs2350137     | 0.404332  | 0.355487     | 0.026647208 |
| 17         | rs17185043    | 0.0752688 | 0.106097     | 0.026647208 |
| 20         | rs6022965     | 0.203237  | 0.247021     | 0.026647208 |
| 1          | rs1974080     | 0.22043   | 0.180935     | 0.026661755 |
| 2          | rs976160      | 0.415771  | 0.36703      | 0.026661755 |
| 5          | rs4912933     | 0.333333  | 0.287832     | 0.026661755 |
| 7          | rs2700919     | 0.175627  | 0.217139     | 0.026661755 |
| 8          | rs11990285    | 0.0431655 | 0.0678949    | 0.026661755 |
| 8          | rs7821631     | 0.158273  | 0.198532     | 0.026661755 |
| 10         | rs12571712    | 0.412186  | 0.462521     | 0.026661755 |
| 11         | rs6483478     | 0.134892  | 0.172795     | 0.026661755 |
| 12         | SNP_A-2200553 | 0.0539568 | 0.081201     | 0.026661755 |
| 15         | rs11857061    | 0.148746  | 0.115634     | 0.026661755 |
| 1          | rs513049      | 0.16129   | 0.201465     | 0.02667631  |
| 5          | rs7715679     | 0.429856  | 0.38118      | 0.02667631  |
| 7          | rs6946418     | 0.345878  | 0.300034     | 0.02667631  |
| 13         | rs9520260     | 0.197133  | 0.159952     | 0.02667631  |
| 17         | rs17138469    | 0.207885  | 0.169448     | 0.02667631  |
| 1          | rs11545882    | 0.129496  | 0.166837     | 0.026690873 |
| 3          | rs1522936     | 0.471326  | 0.420694     | 0.026690873 |
| 12         | rs12423796    | 0.517921  | 0.467484     | 0.026690873 |
| 14         | rs11850831    | 0.240143  | 0.285154     | 0.026690873 |
| 16         | rs12448471    | 0.272401  | 0.229826     | 0.026690873 |
| 17         | rs7216570     | 0.243728  | 0.289877     | 0.026690873 |
| 1          | rs12408916    | 0.169065  | 0.134242     | 0.026705445 |
| 1          | rs17706475    | 0.297491  | 0.253149     | 0.026705445 |
| 11         | rs2595468     | 0.437276  | 0.488249     | 0.026705445 |
| 13         | rs17257154    | 0.104317  | 0.138766     | 0.026705445 |
| 4          | rs12644073    | 0.267025  | 0.224285     | 0.026720024 |
| 5          | rs1529686     | 0.157706  | 0.124489     | 0.026720024 |
| 8          | rs6990764     | 0.0629496 | 0.0913593    | 0.026720024 |
| 20         | rs6029609     | 0.421147  | 0.472061     | 0.026720024 |
| 4          | rs2622351     | 0.344086  | 0.297854     | 0.026734613 |
| 1          | rs2789792     | 0.413978  | 0.365293     | 0.026749209 |
| 4          | rs706349      | 0.286738  | 0.334299     | 0.026749209 |
| 10         | rs2420060     | 0.16129   | 0.127514     | 0.026749209 |

Table DS2: All SNPs tested for association (RDC SABP vs. controls) with the Cochran-Armitage trend test and significant at the p=0.05 threshold.

| chromosome | SNP           | MAF_cases | MAF_controls | p_value     |
|------------|---------------|-----------|--------------|-------------|
| 2          | rs10496185    | 0.0860215 | 0.118488     | 0.026763814 |
| 2          | rs960246      | 0.0752688 | 0.105559     | 0.026763814 |
| 8          | SNP_A-2128346 | 0.0698925 | 0.048277     | 0.026763814 |
| 1          | rs605025      | 0.0467626 | 0.0723774    | 0.026778427 |
| 3          | rs7626018     | 0.464158  | 0.413687     | 0.026778427 |
| 13         | rs793638      | 0.195341  | 0.158316     | 0.026778427 |
| 14         | rs2150298     | 0.317204  | 0.366236     | 0.026778427 |
| 19         | rs2650757     | 0.243728  | 0.202864     | 0.026778427 |
| 1          | rs12129635    | 0.0860215 | 0.0616065    | 0.026793048 |
| 4          | rs13115839    | 0.207885  | 0.252472     | 0.026793048 |
| 4          | rs337628      | 0.215054  | 0.259196     | 0.026793048 |
| 17         | rs2909218     | 0.167266  | 0.207624     | 0.026793048 |
| 4          | rs6553184     | 0.415771  | 0.366655     | 0.026807677 |
| 5          | rs1330647     | 0.519856  | 0.469123     | 0.026807677 |
| 7          | rs17823517    | 0.182796  | 0.146578     | 0.026807677 |
| 12         | rs2047054     | 0.419355  | 0.370528     | 0.026807677 |
| 8          | rs1378035     | 0.320789  | 0.368771     | 0.026822315 |
| 12         | rs1532349     | 0.099278  | 0.0730835    | 0.026822315 |
| 1          | rs6424940     | 0.301075  | 0.349166     | 0.026836961 |
| 3          | rs13071246    | 0.539711  | 0.489086     | 0.026836961 |
| 6          | rs1325476     | 0.0501792 | 0.0771721    | 0.026836961 |
| 12         | rs10745735    | 0.117329  | 0.088045     | 0.026836961 |
| 14         | rs10131137    | 0.221223  | 0.265827     | 0.026836961 |
| 2          | rs6713754     | 0.0358423 | 0.0589438    | 0.026851616 |
| 3          | rs17354174    | 0.310036  | 0.265668     | 0.026851616 |
| 5          | rs1477612     | 0.458781  | 0.40906      | 0.026851616 |
| 6          | rs542538      | 0.392473  | 0.344027     | 0.026851616 |
| 8          | rs2360804     | 0.132616  | 0.102114     | 0.026866279 |
| 11         | rs10082687    | 0.275986  | 0.322888     | 0.026866279 |
| 5          | rs32775       | 0.173835  | 0.21587      | 0.02688095  |
| 6          | rs9490794     | 0.105735  | 0.140375     | 0.02688095  |
| 11         | rs1481892     | 0.252688  | 0.299285     | 0.02688095  |
| 18         | rs17581972    | 0.494624  | 0.444085     | 0.02688095  |
| 2          | rs13427223    | 0.0842294 | 0.116445     | 0.026895629 |
| 2          | rs7599379     | 0.379928  | 0.429083     | 0.026895629 |
| 2          | rs4675226     | 0.299639  | 0.255616     | 0.026910317 |
| 9          | rs10973825    | 0.131295  | 0.169278     | 0.026910317 |
| 15         | rs3816940     | 0.172043  | 0.136286     | 0.026910317 |
| 18         | rs9941423     | 0.421147  | 0.472232     | 0.026910317 |
| 19         | rs10520203    | 0.0681004 | 0.0977816    | 0.026910317 |
| 20         | rs2208185     | 0.535842  | 0.485865     | 0.026910317 |
| 2          | rs4458144     | 0.324373  | 0.278876     | 0.026925013 |
| 13         | rs7139557     | 0.365108  | 0.318089     | 0.026925013 |
| 1          | rs1417231     | 0.0881295 | 0.062968     | 0.026939718 |
| 11         | rs10898589    | 0.100358  | 0.0736447    | 0.026939718 |
| 1          | rs2483062     | 0.0860215 | 0.0616275    | 0.026954431 |
| 3          | rs3845864     | 0.34767   | 0.301129     | 0.026954431 |
| 7          | rs1450869     | 0.327957  | 0.376661     | 0.026954431 |
| 7          | rs17147002    | 0.34767   | 0.396963     | 0.026954431 |
| 8          | rs7818064     | 0.218638  | 0.179837     | 0.026954431 |
| 16         | rs7203816     | 0.271583  | 0.318337     | 0.026954431 |
| 2          | rs12618854    | 0.0815217 | 0.057771     | 0.026969152 |

Table DS2: All SNPs tested for association (RDC SABP vs. controls) with the Cochran-Armitage trend test and significant at the p=0.05 threshold.

| chromosome | SNP           | MAF_cases | MAF_controls | p_value     |
|------------|---------------|-----------|--------------|-------------|
| 3          | rs11129740    | 0.209677  | 0.253236     | 0.026969152 |
| 4          | rs10517741    | 0.413978  | 0.365169     | 0.026969152 |
| 5          | rs2007303     | 0.37276   | 0.422658     | 0.026969152 |
| 2          | rs11096605    | 0.116487  | 0.151856     | 0.026983881 |
| 6          | rs2503627     | 0.431159  | 0.381691     | 0.026983881 |
| 10         | rs2256766     | 0.480287  | 0.430905     | 0.026983881 |
| 13         | rs765410      | 0.119134  | 0.0898398    | 0.026983881 |
| 9          | rs4742226     | 0.442652  | 0.393003     | 0.026998619 |
| 11         | rs2741775     | 0.436823  | 0.487909     | 0.026998619 |
| 22         | rs1009150     | 0.329749  | 0.284401     | 0.026998619 |
| 2          | rs10445757    | 0.294224  | 0.342356     | 0.027013365 |
| 6          | rs16890791    | 0.256272  | 0.302587     | 0.027013365 |
| 8          | rs4875445     | 0.46595   | 0.416269     | 0.027013365 |
| 10         | rs7088780     | 0.207885  | 0.251876     | 0.027013365 |
| 20         | rs6142044     | 0.326715  | 0.375937     | 0.027013365 |
| 5          | rs6887275     | 0.204301  | 0.166496     | 0.02702812  |
| 13         | rs495838      | 0.210432  | 0.254511     | 0.02702812  |
| 21         | rs8127865     | 0.172043  | 0.212972     | 0.02702812  |
| 1          | rs565742      | 0.157706  | 0.198055     | 0.027042883 |
| 3          | SNP_A-2198811 | 0.177419  | 0.21825      | 0.027042883 |
| 6          | rs2050056     | 0.0878136 | 0.120389     | 0.027042883 |
| 8          | rs6472776     | 0.233813  | 0.193763     | 0.027042883 |
| 8          | rs10875380    | 0.306452  | 0.355317     | 0.027042883 |
| 9          | rs9409992     | 0.395307  | 0.445467     | 0.027042883 |
| 12         | rs2673689     | 0.408602  | 0.359843     | 0.027042883 |
| 14         | rs11627587    | 0.317204  | 0.366178     | 0.027042883 |
| 20         | rs200184      | 0.415468  | 0.465711     | 0.027042883 |
| 21         | rs2836317     | 0.111511  | 0.147149     | 0.027042883 |
| 2          | rs6736508     | 0.451439  | 0.400886     | 0.027057655 |
| 5          | rs4235536     | 0.451613  | 0.402451     | 0.027057655 |
| 11         | rs11214457    | 0.0949821 | 0.128376     | 0.027057655 |
| 18         | rs7242969     | 0.125448  | 0.16201      | 0.027057655 |
| 6          | rs2022991     | 0.379496  | 0.332595     | 0.027072434 |
| 10         | rs872875      | 0.244604  | 0.203779     | 0.027072434 |
| 12         | rs9669474     | 0.155914  | 0.1224       | 0.027072434 |
| 1          | rs12081961    | 0.259857  | 0.306853     | 0.027087223 |
| 10         | rs1886280     | 0.420863  | 0.371677     | 0.027087223 |
| 17         | rs12602529    | 0.0773381 | 0.107836     | 0.027087223 |
| 22         | rs9610304     | 0.207885  | 0.251704     | 0.027087223 |
| 2          | rs443852      | 0.315412  | 0.36359      | 0.027102019 |
| 2          | rs2872379     | 0.196043  | 0.238768     | 0.027102019 |
| 2          | rs11682779    | 0.359712  | 0.409942     | 0.027102019 |
| 3          | rs4241545     | 0.317204  | 0.272557     | 0.027102019 |
| 5          | rs6860516     | 0.417563  | 0.468132     | 0.027102019 |
| 7          | rs6957876     | 0.476619  | 0.426771     | 0.027102019 |
| 18         | rs6507820     | 0.0483871 | 0.0747107    | 0.027102019 |
| 1          | rs1853827     | 0.178058  | 0.219155     | 0.027116824 |
| 4          | rs17314252    | 0.413978  | 0.365201     | 0.027116824 |
| 11         | rs4128868     | 0.168459  | 0.20937      | 0.027116824 |
| 21         | rs1735961     | 0.27957   | 0.326124     | 0.027116824 |
| 2          | rs6436110     | 0.272401  | 0.229656     | 0.027131638 |
| 3          | rs4688610     | 0.0878136 | 0.119721     | 0.027131638 |

Table DS2: All SNPs tested for association (RDC SABP vs. controls) with the Cochran-Armitage trend test and significant at the p=0.05 threshold.

| chromosome | SNP        | MAF_cases | MAF_controls | p_value     |
|------------|------------|-----------|--------------|-------------|
| 6          | rs9404463  | 0.308244  | 0.263543     | 0.027131638 |
| 2          | rs744636   | 0.338129  | 0.386712     | 0.027146459 |
| 2          | rs1371144  | 0.15343   | 0.120143     | 0.027146459 |
| 6          | rs9379638  | 0.453405  | 0.40344      | 0.027146459 |
| 12         | rs1895980  | 0.203237  | 0.165644     | 0.027146459 |
| 8          | rs13265571 | 0.482079  | 0.432538     | 0.02716129  |
| 9          | rs7858435  | 0.473118  | 0.423732     | 0.02716129  |
| 1          | rs2802722  | 0.408273  | 0.458078     | 0.027176128 |
| 2          | rs7560515  | 0.0609319 | 0.0892371    | 0.027176128 |
| 2          | rs13410843 | 0.487455  | 0.437479     | 0.027176128 |
| 4          | rs7659833  | 0.308244  | 0.263454     | 0.027176128 |
| 4          | rs12501949 | 0.489209  | 0.439353     | 0.027176128 |
| 12         | rs7975752  | 0.519713  | 0.469144     | 0.027176128 |
| 18         | rs1786776  | 0.0394265 | 0.0638624    | 0.027176128 |
| 18         | rs8084077  | 0.324373  | 0.279101     | 0.027176128 |
| 1          | rs11580965 | 0.181004  | 0.144925     | 0.027190976 |
| 6          | rs227837   | 0.360215  | 0.408859     | 0.027205831 |
| 14         | rs17095814 | 0.218638  | 0.179618     | 0.027205831 |
| 2          | rs6728366  | 0.476703  | 0.426796     | 0.027220695 |
| 8          | rs1487742  | 0.121818  | 0.0920109    | 0.027220695 |
| 13         | rs9530499  | 0.259928  | 0.306342     | 0.027220695 |
| 15         | rs8036777  | 0.439068  | 0.389059     | 0.027220695 |
| 1          | rs10922719 | 0.421147  | 0.47138      | 0.027235567 |
| 5          | rs11950065 | 0.252688  | 0.211368     | 0.027235567 |
| 6          | rs2753138  | 0.178058  | 0.220123     | 0.027235567 |
| 7          | rs2237326  | 0.154122  | 0.121036     | 0.027235567 |
| 9          | rs1888150  | 0.134409  | 0.171944     | 0.027235567 |
| 8          | rs1601194  | 0.206093  | 0.168029     | 0.027250448 |
| 10         | rs12246611 | 0.207885  | 0.251618     | 0.027250448 |
| 18         | rs9964176  | 0.449821  | 0.400102     | 0.027250448 |
| 20         | rs913785   | 0.0967742 | 0.130405     | 0.027250448 |
| 20         | rs6026274  | 0.446237  | 0.396898     | 0.027250448 |
| 1          | rs1472051  | 0.318345  | 0.272975     | 0.027265338 |
| 11         | rs10892975 | 0.512545  | 0.462377     | 0.027265338 |
| 12         | rs7960614  | 0.378136  | 0.330948     | 0.027265338 |
| 5          | rs294094   | 0.105735  | 0.140811     | 0.027280235 |
| 6          | rs443971   | 0.403986  | 0.355465     | 0.027280235 |
| 8          | rs10503779 | 0.302158  | 0.350034     | 0.027280235 |
| 10         | rs11248533 | 0.078853  | 0.109465     | 0.027280235 |
| 20         | rs2244059  | 0.240143  | 0.284888     | 0.027280235 |
| 9          | rs1359170  | 0.336331  | 0.289877     | 0.027295142 |
| 20         | rs6042992  | 0.0971223 | 0.130835     | 0.027295142 |
| 3          | rs2284843  | 0.354839  | 0.404364     | 0.027310056 |
| 18         | rs4798749  | 0.241935  | 0.201294     | 0.027310056 |
| 2          | rs2571642  | 0.404332  | 0.35612      | 0.02732498  |
| 2          | rs7604877  | 0.541219  | 0.489615     | 0.02732498  |
| 2          | rs10175397 | 0.201439  | 0.244372     | 0.02732498  |
| 4          | rs7659511  | 0.52518   | 0.474258     | 0.02732498  |
| 9          | rs7873512  | 0.454874  | 0.40559      | 0.02732498  |
| 11         | rs4752897  | 0.163669  | 0.203678     | 0.02732498  |
| 16         | rs2550698  | 0.141577  | 0.109199     | 0.02732498  |
| 20         | rs6015949  | 0.308244  | 0.357143     | 0.02732498  |

Table DS2: All SNPs tested for association (RDC SABP vs. controls) with the Cochran-Armitage trend test and significant at the p=0.05 threshold.

| chromosome | SNP        | MAF_cases | MAF_controls | p_value     |
|------------|------------|-----------|--------------|-------------|
| 3          | rs2291853  | 0.467742  | 0.418228     | 0.027339911 |
| 11         | rs7942222  | 0.494604  | 0.444615     | 0.027339911 |
| 11         | rs2121575  | 0.526882  | 0.476669     | 0.027339911 |
| 15         | rs11635019 | 0.189964  | 0.153492     | 0.027339911 |
| 5          | rs10515771 | 0.125448  | 0.163092     | 0.027354852 |
| 6          | rs2438074  | 0.274368  | 0.321782     | 0.027354852 |
| 16         | rs8050204  | 0.17446   | 0.139448     | 0.027354852 |
| 17         | rs9908987  | 0.25448   | 0.3          | 0.027354852 |
| 1          | rs17431127 | 0.341727  | 0.294549     | 0.0273698   |
| 3          | rs6785972  | 0.353047  | 0.30654      | 0.0273698   |
| 4          | rs10517117 | 0.175627  | 0.217547     | 0.0273698   |
| 4          | rs11728461 | 0.518051  | 0.467588     | 0.0273698   |
| 1          | rs12087666 | 0.394265  | 0.444046     | 0.027384757 |
| 5          | rs1106895  | 0.155914  | 0.122956     | 0.027384757 |
| 8          | rs10096243 | 0.33213   | 0.381301     | 0.027384757 |
| 9          | rs696284   | 0.403226  | 0.355026     | 0.027384757 |
| 15         | rs1466930  | 0.451613  | 0.501364     | 0.027384757 |
| 18         | rs633286   | 0.232852  | 0.277248     | 0.027384757 |
| 14         | rs698015   | 0.396057  | 0.348041     | 0.027399723 |
| 14         | rs10134944 | 0.115108  | 0.0860893    | 0.027399723 |
| 1          | rs1552290  | 0.111111  | 0.0829077    | 0.027414697 |
| 5          | rs10061706 | 0.229391  | 0.273842     | 0.027414697 |
| 8          | rs729513   | 0.241935  | 0.28727      | 0.027414697 |
| 16         | rs7199774  | 0.435484  | 0.387185     | 0.027414697 |
| 1          | rs6667780  | 0.258993  | 0.305489     | 0.02742968  |
| 4          | rs12508566 | 0.428315  | 0.379216     | 0.02742968  |
| 7          | rs7795595  | 0.428315  | 0.379727     | 0.02742968  |
| 13         | rs9518615  | 0.435484  | 0.386387     | 0.02742968  |
| 18         | rs17646035 | 0.290323  | 0.246678     | 0.02742968  |
| 1          | rs10798330 | 0.145161  | 0.184031     | 0.027444671 |
| 1          | rs1373293  | 0.433453  | 0.483311     | 0.027444671 |
| 2          | rs16861121 | 0.0734767 | 0.0509543    | 0.027444671 |
| 5          | rs456741   | 0.142086  | 0.180669     | 0.027444671 |
| 5          | rs262859   | 0.145683  | 0.11359      | 0.027444671 |
| 16         | rs4273053  | 0.163082  | 0.203786     | 0.027444671 |
| 3          | rs17029455 | 0.073741  | 0.0513302    | 0.027459671 |
| 12         | rs7957302  | 0.267025  | 0.313779     | 0.027459671 |
| 1          | rs12137505 | 0.448029  | 0.398533     | 0.027474679 |
| 16         | rs8062466  | 0.215827  | 0.177623     | 0.027474679 |
| 8          | rs4737009  | 0.189964  | 0.23207      | 0.027489696 |
| 10         | rs4489642  | 0.170863  | 0.211951     | 0.027489696 |
| 11         | rs1615640  | 0.33871   | 0.293415     | 0.027489696 |
| 15         | rs11633122 | 0.0434783 | 0.068942     | 0.027489696 |
| 13         | rs9602630  | 0.228417  | 0.273177     | 0.027504721 |
| 4          | rs17090188 | 0.104317  | 0.139059     | 0.027519755 |
| 5          | rs12187784 | 0.483871  | 0.43439      | 0.027519755 |
| 12         | rs11058062 | 0.134409  | 0.103207     | 0.027519755 |
| 18         | rs2419037  | 0.453405  | 0.403689     | 0.027519755 |
| 6          | rs1180227  | 0.449821  | 0.400477     | 0.027534797 |
| 8          | rs6990385  | 0.228417  | 0.272805     | 0.027534797 |
| 5          | rs10514916 | 0.284946  | 0.241743     | 0.027549848 |
| 22         | rs16998380 | 0.141577  | 0.109785     | 0.027549848 |



Table DS2: All SNPs tested for association (RDC SABP vs. controls) with the Cochran-Armitage trend test and significant at the p=0.05 threshold.

| chromosome | SNP           | MAF_cases | MAF_controls | p_value     |
|------------|---------------|-----------|--------------|-------------|
| 10         | rs12247217    | 0.0842294 | 0.115594     | 0.027564908 |
| 12         | rs1473652     | 0.543165  | 0.49267      | 0.027564908 |
| 12         | rs11109705    | 0.269784  | 0.227505     | 0.027564908 |
| 18         | rs12607408    | 0.105735  | 0.078141     | 0.027564908 |
| 3          | rs33493       | 0.298561  | 0.346455     | 0.027579976 |
| 11         | rs4930430     | 0.426523  | 0.477311     | 0.027579976 |
| 1          | rs9651083     | 0.370504  | 0.323499     | 0.027595053 |
| 9          | rs10820215    | 0.304659  | 0.352571     | 0.027595053 |
| 9          | rs1591421     | 0.411871  | 0.363156     | 0.027595053 |
| 10         | rs3852458     | 0.225806  | 0.186264     | 0.027595053 |
| 11         | rs11026455    | 0.133574  | 0.103213     | 0.027595053 |
| 13         | rs1924299     | 0.104317  | 0.138501     | 0.027595053 |
| 1          | rs1334806     | 0.267148  | 0.225299     | 0.027610138 |
| 2          | rs11696024    | 0.116487  | 0.151567     | 0.027610138 |
| 2          | rs863926      | 0.333333  | 0.382363     | 0.027610138 |
| 8          | rs6996939     | 0.360215  | 0.409277     | 0.027610138 |
| 9          | rs10809918    | 0.224014  | 0.184264     | 0.027610138 |
| 12         | rs16919561    | 0.0860215 | 0.0616065    | 0.027610138 |
| 8          | rs16904963    | 0.105735  | 0.0785617    | 0.027625232 |
| 15         | rs7177316     | 0.439068  | 0.389192     | 0.027625232 |
| 6          | rs511319      | 0.44086   | 0.391482     | 0.027640334 |
| 8          | rs4073623     | 0.292115  | 0.247866     | 0.027640334 |
| 16         | rs8062216     | 0.147482  | 0.186244     | 0.027640334 |
| 5          | rs16891116    | 0.12724   | 0.16411      | 0.027655445 |
| 2          | rs497973      | 0.397849  | 0.447153     | 0.027670565 |
| 10         | rs7089243     | 0.222222  | 0.183753     | 0.027670565 |
| 1          | rs12568218    | 0.0645161 | 0.0934197    | 0.027685693 |
| 5          | rs16896087    | 0.240143  | 0.285495     | 0.027685693 |
| 14         | rs8008961     | 0.238351  | 0.283282     | 0.027685693 |
| 14         | rs10467722    | 0.274194  | 0.321356     | 0.02770083  |
| 15         | rs690367      | 0.25448   | 0.299319     | 0.02770083  |
| 1          | rs11162766    | 0.0609319 | 0.0894988    | 0.027715975 |
| 4          | rs16883273    | 0.0483871 | 0.0745913    | 0.027715975 |
| 5          | rs9292118     | 0.22043   | 0.264595     | 0.027715975 |
| 8          | rs13252356    | 0.22043   | 0.181756     | 0.027715975 |
| 4          | rs1344033     | 0.212996  | 0.174804     | 0.027731129 |
| 8          | rs10098626    | 0.437276  | 0.389097     | 0.027731129 |
| 12         | rs11176917    | 0.0827338 | 0.11414      | 0.027731129 |
| 16         | rs2194279     | 0.0681004 | 0.0970048    | 0.027731129 |
| 1          | rs859665      | 0.285971  | 0.333163     | 0.027746292 |
| 18         | rs1702459     | 0.0539568 | 0.0807167    | 0.027746292 |
| 1          | rs17126675    | 0.0593525 | 0.0878148    | 0.027776643 |
| 3          | rs6765624     | 0.209677  | 0.252985     | 0.027776643 |
| 6          | rs973089      | 0.104317  | 0.0766074    | 0.027776643 |
| 9          | rs2768278     | 0.115108  | 0.151107     | 0.027776643 |
| 20         | rs911352      | 0.111111  | 0.145954     | 0.027791831 |
| 4          | SNP_A-4227770 | 0.306452  | 0.353883     | 0.027807028 |
| 6          | rs9501762     | 0.178058  | 0.220273     | 0.027807028 |
| 12         | rs11174783    | 0.159498  | 0.126022     | 0.027807028 |
| 16         | rs9937138     | 0.449821  | 0.40017      | 0.027807028 |
| 8          | rs6470263     | 0.241935  | 0.287125     | 0.027822234 |
| 10         | rs4146431     | 0.435484  | 0.38658      | 0.027822234 |

Table DS2: All SNPs tested for association (RDC SABP vs. controls) with the Cochran-Armitage trend test and significant at the p=0.05 threshold.

| chromosome | SNP        | MAF_cases | MAF_controls | p_value     |
|------------|------------|-----------|--------------|-------------|
| 11         | rs2166658  | 0.526882  | 0.476839     | 0.027822234 |
| 12         | rs269806   | 0.320789  | 0.275545     | 0.027822234 |
| 17         | rs7222501  | 0.37276   | 0.324906     | 0.027822234 |
| 20         | rs2567608  | 0.496403  | 0.446392     | 0.027822234 |
| 7          | rs12530540 | 0.0645161 | 0.0938671    | 0.027837449 |
| 9          | rs1331897  | 0.339928  | 0.294178     | 0.027837449 |
| 2          | rs16864736 | 0.537634  | 0.487743     | 0.027852672 |
| 4          | rs16891402 | 0.0755396 | 0.106303     | 0.027852672 |
| 4          | rs17008373 | 0.111111  | 0.146317     | 0.027852672 |
| 1          | rs1886503  | 0.38172   | 0.333844     | 0.027867903 |
| 9          | rs10820216 | 0.306452  | 0.354344     | 0.027867903 |
| 9          | rs4842091  | 0.302867  | 0.258268     | 0.027867903 |
| 3          | rs4591526  | 0.331541  | 0.28608      | 0.027883144 |
| 8          | rs4242497  | 0.408602  | 0.360184     | 0.027883144 |
| 13         | rs9572034  | 0.21147   | 0.254768     | 0.027883144 |
| 5          | rs10045987 | 0.419355  | 0.469676     | 0.027898393 |
| 7          | rs11767506 | 0.37276   | 0.422526     | 0.027898393 |
| 12         | rs11169170 | 0.422662  | 0.472743     | 0.027898393 |
| 13         | rs1438646  | 0.21147   | 0.254775     | 0.027898393 |
| 13         | rs7995700  | 0.53405   | 0.483487     | 0.027898393 |
| 20         | rs6112513  | 0.408602  | 0.458433     | 0.027898393 |
| 2          | rs1518099  | 0.221223  | 0.265849     | 0.027913651 |
| 5          | rs814586   | 0.324373  | 0.372188     | 0.027913651 |
| 5          | rs4470727  | 0.415468  | 0.367632     | 0.027913651 |
| 7          | rs4329194  | 0.190647  | 0.154174     | 0.027913651 |
| 8          | rs2970631  | 0.366906  | 0.416269     | 0.027913651 |
| 21         | rs2825415  | 0.284173  | 0.33106      | 0.027913651 |
| 2          | rs10188899 | 0.270609  | 0.316462     | 0.027928917 |
| 5          | rs25943    | 0.179856  | 0.144074     | 0.027928917 |
| 16         | rs8045963  | 0.234767  | 0.279707     | 0.027928917 |
| 19         | rs2133820  | 0.243728  | 0.203168     | 0.027928917 |
| 3          | rs17043640 | 0.184588  | 0.225834     | 0.027944192 |
| 4          | rs2118355  | 0.117329  | 0.153452     | 0.027944192 |
| 4          | rs2171233  | 0.235612  | 0.195704     | 0.027944192 |
| 11         | rs2840342  | 0.367384  | 0.417008     | 0.027944192 |
| 16         | rs4787235  | 0.183453  | 0.14748      | 0.027944192 |
| 18         | rs4940595  | 0.318996  | 0.273688     | 0.027944192 |
| 21         | rs1709833  | 0.388889  | 0.438372     | 0.027944192 |
| 4          | rs931448   | 0.0913978 | 0.124064     | 0.027959476 |
| 7          | rs12698422 | 0.0483871 | 0.0745479    | 0.027959476 |
| 2          | rs1000624  | 0.209677  | 0.253492     | 0.027974769 |
| 11         | rs586473   | 0.344086  | 0.297651     | 0.027974769 |
| 1          | rs1476267  | 0.351254  | 0.401056     | 0.02800538  |
| 1          | rs10158307 | 0.433692  | 0.483311     | 0.02800538  |
| 8          | rs11779314 | 0.12724   | 0.0972411    | 0.02800538  |
| 8          | rs1500898  | 0.365591  | 0.414875     | 0.02800538  |
| 13         | rs6492172  | 0.259857  | 0.218399     | 0.02800538  |
| 6          | rs9342585  | 0.354839  | 0.403925     | 0.028020699 |
| 12         | rs1922270  | 0.109319  | 0.0819142    | 0.028020699 |
| 15         | rs4924127  | 0.358423  | 0.312904     | 0.028020699 |
| 6          | rs6908964  | 0.159498  | 0.126108     | 0.028036026 |
| 20         | rs618897   | 0.306452  | 0.26253      | 0.028036026 |

Table DS2: All SNPs tested for association (RDC SABP vs. controls) with the Cochran-Armitage trend test and significant at the p=0.05 threshold.

| chromosome | SNP        | MAF_cases | MAF_controls | p_value     |
|------------|------------|-----------|--------------|-------------|
| 1          | rs1414520  | 0.366906  | 0.415901     | 0.028051362 |
| 5          | rs3846608  | 0.274194  | 0.321185     | 0.028051362 |
| 5          | rs17061105 | 0.188172  | 0.151464     | 0.028051362 |
| 7          | rs962294   | 0.253597  | 0.299523     | 0.028051362 |
| 20         | rs6047191  | 0.309353  | 0.265146     | 0.028051362 |
| 2          | rs13034681 | 0.206835  | 0.168658     | 0.028066707 |
| 3          | rs3772883  | 0.40681   | 0.359088     | 0.028066707 |
| 4          | rs4975071  | 0.235612  | 0.280824     | 0.028066707 |
| 6          | rs910553   | 0.428315  | 0.478542     | 0.028066707 |
| 7          | rs10271154 | 0.213262  | 0.256734     | 0.028066707 |
| 21         | rs2834845  | 0.184588  | 0.22557      | 0.028066707 |
| 2          | rs6728048  | 0.231183  | 0.276338     | 0.028082061 |
| 4          | rs6824412  | 0.430108  | 0.381431     | 0.028082061 |
| 5          | rs573125   | 0.0555556 | 0.0828221    | 0.028082061 |
| 7          | rs4721102  | 0.448029  | 0.498127     | 0.028082061 |
| 18         | rs16940664 | 0.197842  | 0.161263     | 0.028082061 |
| 19         | rs1607664  | 0.243728  | 0.203168     | 0.028082061 |
| 1          | rs10779675 | 0.112903  | 0.148072     | 0.028097423 |
| 2          | rs9631013  | 0.161871  | 0.128367     | 0.028097423 |
| 12         | rs4762205  | 0.217626  | 0.261085     | 0.028097423 |
| 16         | rs12456    | 0.100719  | 0.0742068    | 0.028097423 |
| 4          | rs12505222 | 0.261649  | 0.308543     | 0.028112794 |
| 11         | rs1164673  | 0.336918  | 0.384458     | 0.028112794 |
| 1          | rs17382457 | 0.281362  | 0.328508     | 0.028128174 |
| 3          | rs13087397 | 0.354839  | 0.404128     | 0.028128174 |
| 21         | rs11701265 | 0.275986  | 0.322608     | 0.028128174 |
| 3          | rs4683029  | 0.462366  | 0.413088     | 0.028143562 |
| 8          | rs4633069  | 0.206093  | 0.168199     | 0.028143562 |
| 21         | rs2837623  | 0.28853   | 0.336233     | 0.028143562 |
| 21         | rs4818873  | 0.170251  | 0.210688     | 0.028143562 |
| 1          | rs2319971  | 0.320789  | 0.368511     | 0.02815896  |
| 5          | rs877069   | 0.244604  | 0.290218     | 0.02815896  |
| 15         | rs16953669 | 0.0809353 | 0.112398     | 0.02815896  |
| 1          | rs12021752 | 0.238351  | 0.283839     | 0.028174366 |
| 2          | rs6728347  | 0.413978  | 0.365928     | 0.028174366 |
| 2          | rs7571015  | 0.129496  | 0.0989441    | 0.028174366 |
| 3          | rs9826632  | 0.0555556 | 0.0827375    | 0.028174366 |
| 3          | rs1050088  | 0.388889  | 0.438671     | 0.028174366 |
| 3          | rs1512044  | 0.100719  | 0.0743266    | 0.028174366 |
| 8          | rs1382611  | 0.415771  | 0.46594      | 0.028174366 |
| 9          | rs328846   | 0.383513  | 0.336001     | 0.028174366 |
| 11         | rs1498476  | 0.078853  | 0.110164     | 0.028174366 |
| 3          | rs9853121  | 0.100719  | 0.074276     | 0.028189781 |
| 4          | rs1874648  | 0.426259  | 0.377558     | 0.028189781 |
| 11         | rs716281   | 0.49639   | 0.446642     | 0.028189781 |
| 12         | rs1684388  | 0.462366  | 0.412777     | 0.028189781 |
| 16         | rs7203144  | 0.37276   | 0.325494     | 0.028189781 |
| 3          | rs310704   | 0.0913978 | 0.123808     | 0.028205204 |
| 3          | rs13067150 | 0.394265  | 0.346796     | 0.028205204 |
| 4          | rs13124562 | 0.177419  | 0.142175     | 0.028205204 |
| 5          | rs375359   | 0.449821  | 0.400545     | 0.028205204 |
| 7          | rs7782579  | 0.107527  | 0.141445     | 0.028205204 |

Table DS2 All SNPs tested for association (RDC SABP vs. controls) with the Cochran-Armitage trend test and significant at the p=0.05 threshold.

| chromosome | SNP           | MAF_cases | MAF_controls | p_value     |
|------------|---------------|-----------|--------------|-------------|
| 12         | rs741366      | 0.150538  | 0.117427     | 0.028205204 |
| 18         | rs8093289     | 0.22043   | 0.18109      | 0.028205204 |
| 1          | rs7535666     | 0.24552   | 0.291284     | 0.028220637 |
| 4          | rs8180200     | 0.234767  | 0.195097     | 0.028220637 |
| 9          | rs1514773     | 0.301075  | 0.348366     | 0.028220637 |
| 6          | rs2389542     | 0.18638   | 0.150375     | 0.028251528 |
| 7          | rs6968031     | 0.166667  | 0.132458     | 0.028251528 |
| 10         | rs11254433    | 0.189964  | 0.153649     | 0.028251528 |
| 12         | rs7304088     | 0.131295  | 0.10116      | 0.028251528 |
| 17         | rs4925094     | 0.519713  | 0.469857     | 0.028251528 |
| 17         | rs3815180     | 0.11828   | 0.154514     | 0.028251528 |
| 2          | rs6725315     | 0.182796  | 0.147189     | 0.028266987 |
| 3          | rs7635818     | 0.492832  | 0.443914     | 0.028266987 |
| 5          | rs26531       | 0.339928  | 0.38853      | 0.028266987 |
| 9          | rs1806697     | 0.442652  | 0.394074     | 0.028266987 |
| 10         | rs12411538    | 0.335125  | 0.288999     | 0.028266987 |
| 20         | rs845605      | 0.136691  | 0.105622     | 0.028266987 |
| 1          | rs1773560     | 0.467742  | 0.417461     | 0.028282454 |
| 2          | rs17628074    | 0.537634  | 0.4879       | 0.028282454 |
| 7          | rs1569079     | 0.168459  | 0.134438     | 0.028282454 |
| 12         | rs7967625     | 0.27518   | 0.232606     | 0.028282454 |
| 17         | rs1044420     | 0.177419  | 0.218739     | 0.028282454 |
| 1          | rs12407822    | 0.388087  | 0.437969     | 0.028297931 |
| 2          | rs6707030     | 0.0806452 | 0.112151     | 0.028297931 |
| 7          | rs971648      | 0.501792  | 0.451959     | 0.028297931 |
| 7          | rs1527479     | 0.390681  | 0.440143     | 0.028297931 |
| 14         | rs2210181     | 0.317204  | 0.365758     | 0.028297931 |
| 15         | rs2292175     | 0.437276  | 0.487044     | 0.028297931 |
| 17         | rs11078512    | 0.124549  | 0.161208     | 0.028297931 |
| 2          | rs6740818     | 0.0734767 | 0.103066     | 0.028313416 |
| 6          | rs1513013     | 0.197842  | 0.160593     | 0.028313416 |
| 9          | rs7034015     | 0.0824373 | 0.0588336    | 0.028313416 |
| 10         | rs4881109     | 0.208633  | 0.252472     | 0.028313416 |
| 10         | rs11005618    | 0.182796  | 0.224455     | 0.028313416 |
| 12         | rs2239050     | 0.12724   | 0.0973406    | 0.028313416 |
| 18         | rs3098920     | 0.246403  | 0.292135     | 0.028313416 |
| 3          | rs2134427     | 0.0896057 | 0.0644831    | 0.028359925 |
| 8          | rs1077593     | 0.453237  | 0.50324      | 0.028359925 |
| 9          | rs10739343    | 0.259857  | 0.218111     | 0.028359925 |
| 10         | rs2806158     | 0.396057  | 0.445789     | 0.028359925 |
| 13         | rs9319303     | 0.125448  | 0.162406     | 0.028359925 |
| 14         | rs8012559     | 0.261649  | 0.307889     | 0.028359925 |
| 3          | rs689307      | 0.244604  | 0.203918     | 0.028375445 |
| 5          | rs1386320     | 0.216846  | 0.178134     | 0.028375445 |
| 5          | rs1862174     | 0.216846  | 0.26064      | 0.028375445 |
| 16         | rs1874021     | 0.218638  | 0.262002     | 0.028375445 |
| 1          | rs1504703     | 0.387097  | 0.339523     | 0.028390975 |
| 3          | rs1375799     | 0.103943  | 0.138577     | 0.028390975 |
| 4          | rs1542459     | 0.148746  | 0.187543     | 0.028390975 |
| 5          | SNP_A-1814267 | 0.282374  | 0.238753     | 0.028390975 |
| 7          | rs10215545    | 0.356115  | 0.30937      | 0.028390975 |
| 9          | rs4740823     | 0.356631  | 0.310051     | 0.028390975 |

Table DS2: All SNPs tested for association (RDC SABP vs. controls) with the Cochran-Armitage trend test and significant at the p=0.05 threshold.

| chromosome | SNP        | MAF_cases | MAF_controls | p_value     |
|------------|------------|-----------|--------------|-------------|
| 2          | rs7601880  | 0.0949821 | 0.127852     | 0.028406513 |
| 2          | rs2894451  | 0.0949821 | 0.127852     | 0.028406513 |
| 5          | rs2240800  | 0.181004  | 0.145606     | 0.028406513 |
| 12         | rs17440893 | 0.204301  | 0.166325     | 0.028406513 |
| 13         | rs2994906  | 0.170251  | 0.209952     | 0.028406513 |
| 15         | rs4129470  | 0.270609  | 0.228294     | 0.028406513 |
| 5          | rs185119   | 0.215054  | 0.1761       | 0.02842206  |
| 17         | rs203093   | 0.223022  | 0.267973     | 0.02842206  |
| 12         | rs1993981  | 0.383513  | 0.336286     | 0.028437616 |
| 12         | rs7964815  | 0.131295  | 0.101195     | 0.028453181 |
| 15         | rs4774376  | 0.124549  | 0.0947924    | 0.028453181 |
| 19         | rs9807872  | 0.225806  | 0.186435     | 0.028453181 |
| 2          | rs2135999  | 0.402878  | 0.355003     | 0.028468754 |
| 3          | rs12638088 | 0.267025  | 0.31299      | 0.028468754 |
| 17         | rs1044414  | 0.166667  | 0.207255     | 0.028468754 |
| 12         | rs3825300  | 0.151079  | 0.118018     | 0.028484337 |
| 18         | rs7233897  | 0.31295   | 0.268222     | 0.028484337 |
| 3          | rs4622897  | 0.324373  | 0.372446     | 0.028499928 |
| 4          | rs1486496  | 0.235612  | 0.195838     | 0.028499928 |
| 4          | rs4077693  | 0.46595   | 0.416269     | 0.028499928 |
| 9          | rs10814834 | 0.498208  | 0.448959     | 0.028499928 |
| 4          | rs195891   | 0.148746  | 0.116263     | 0.028515529 |
| 20         | rs6086370  | 0.214029  | 0.17586      | 0.028515529 |
| 2          | rs10490621 | 0.0899281 | 0.0650323    | 0.028531138 |
| 4          | rs10517595 | 0.278777  | 0.235855     | 0.028531138 |
| 7          | rs6965205  | 0.338129  | 0.292533     | 0.028531138 |
| 13         | rs4943327  | 0.428315  | 0.378958     | 0.028531138 |
| 2          | rs11883583 | 0.442446  | 0.492147     | 0.028562383 |
| 6          | rs4509144  | 0.105735  | 0.139836     | 0.028562383 |
| 8          | rs752040   | 0.270609  | 0.317036     | 0.028562383 |
| 10         | rs4917464  | 0.399281  | 0.448705     | 0.028562383 |
| 4          | rs2055942  | 0.318996  | 0.273919     | 0.028578019 |
| 14         | rs8008285  | 0.11828   | 0.154069     | 0.028578019 |
| 22         | rs1076298  | 0.281362  | 0.238152     | 0.028578019 |
| 1          | rs4658154  | 0.410072  | 0.361793     | 0.028593664 |
| 11         | rs2861990  | 0.523297  | 0.473442     | 0.028593664 |
| 15         | rs399119   | 0.252688  | 0.211414     | 0.028593664 |
| 16         | rs173759   | 0.52509   | 0.475145     | 0.028593664 |
| 2          | rs10187299 | 0.526882  | 0.476839     | 0.028609317 |
| 3          | rs17025857 | 0.255396  | 0.300852     | 0.028609317 |
| 4          | rs7683010  | 0.297834  | 0.345931     | 0.028609317 |
| 5          | rs880770   | 0.315412  | 0.363        | 0.028609317 |
| 6          | rs9368906  | 0.218638  | 0.179884     | 0.028609317 |
| 8          | rs13267913 | 0.256272  | 0.301704     | 0.028609317 |
| 3          | rs9868885  | 0.462366  | 0.413288     | 0.02862498  |
| 13         | rs17471066 | 0.267025  | 0.22506      | 0.02862498  |
| 5          | rs11953497 | 0.107527  | 0.141493     | 0.028640652 |
| 5          | rs2300066  | 0.166667  | 0.132368     | 0.028640652 |
| 11         | rs11026257 | 0.5       | 0.449864     | 0.028640652 |
| 2          | rs12329085 | 0.194245  | 0.237308     | 0.028656332 |
| 4          | rs3113757  | 0.159498  | 0.198908     | 0.028656332 |
| 13         | rs9317240  | 0.523297  | 0.472991     | 0.028656332 |

Table DS2: All SNPs tested for association (RDC SABP vs. controls) with the Cochran-Armitage trend test and significant at the p=0.05 threshold.

| chromosome | SNP        | MAF_cases | MAF_controls | p_value     |
|------------|------------|-----------|--------------|-------------|
| 3          | rs7635212  | 0.4319    | 0.382453     | 0.028672021 |
| 12         | rs3759173  | 0.210432  | 0.172578     | 0.028672021 |
| 20         | rs941798   | 0.501792  | 0.451838     | 0.028672021 |
| 1          | rs10923015 | 0.322581  | 0.370743     | 0.02868772  |
| 5          | rs10042097 | 0.516129  | 0.466428     | 0.02868772  |
| 19         | rs11879589 | 0.11828   | 0.0895472    | 0.02868772  |
| 1          | rs12048201 | 0.114695  | 0.150834     | 0.028703427 |
| 15         | rs6494590  | 0.496416  | 0.446794     | 0.028703427 |
| 3          | rs1153584  | 0.476703  | 0.428279     | 0.028719143 |
| 4          | rs4648068  | 0.359712  | 0.313415     | 0.028719143 |
| 5          | rs1422178  | 0.231183  | 0.191954     | 0.028719143 |
| 10         | rs11191734 | 0.361511  | 0.314714     | 0.028719143 |
| 14         | rs17103113 | 0.200717  | 0.163376     | 0.028719143 |
| 19         | rs1897823  | 0.374552  | 0.423995     | 0.028719143 |
| 20         | rs4297946  | 0.410394  | 0.460634     | 0.028719143 |
| 2          | rs17335631 | 0.270609  | 0.317439     | 0.028734869 |
| 4          | rs1825238  | 0.281588  | 0.23919      | 0.028734869 |
| 11         | rs1481872  | 0.541219  | 0.491312     | 0.028734869 |
| 18         | rs4441369  | 0.435484  | 0.484848     | 0.028734869 |
| 3          | rs17354202 | 0.310036  | 0.266178     | 0.028766346 |
| 13         | rs9567331  | 0.192446  | 0.234763     | 0.028766346 |
| 13         | rs7984771  | 0.0430108 | 0.0674292    | 0.028766346 |
| 13         | rs7991916  | 0.214029  | 0.257834     | 0.028766346 |
| 14         | rs1076861  | 0.0755396 | 0.105828     | 0.028766346 |
| 11         | rs621363   | 0.22043   | 0.181772     | 0.028782098 |
| 12         | rs16919502 | 0.0860215 | 0.0618188    | 0.028782098 |
| 15         | rs10518738 | 0.111111  | 0.146146     | 0.028782098 |
| 2          | rs9752743  | 0.492806  | 0.443101     | 0.028797859 |
| 3          | rs2317704  | 0.370036  | 0.419223     | 0.028797859 |
| 12         | rs10847047 | 0.243728  | 0.288908     | 0.028797859 |
| 2          | rs4503943  | 0.430108  | 0.381682     | 0.028813629 |
| 6          | rs6899693  | 0.363799  | 0.317144     | 0.028813629 |
| 8          | rs11786343 | 0.311151  | 0.359407     | 0.028813629 |
| 11         | rs570739   | 0.129032  | 0.164959     | 0.028813629 |
| 13         | rs354789   | 0.164875  | 0.204019     | 0.028813629 |
| 4          | rs10938502 | 0.489247  | 0.440014     | 0.028829409 |
| 12         | rs716704   | 0.133094  | 0.102761     | 0.028829409 |
| 13         | rs1446754  | 0.146953  | 0.114402     | 0.028829409 |
| 20         | rs12625561 | 0.299283  | 0.256127     | 0.028829409 |
| 9          | rs1182648  | 0.528777  | 0.478727     | 0.028845197 |
| 12         | rs7138309  | 0.442446  | 0.393965     | 0.028845197 |
| 14         | rs847235   | 0.309353  | 0.357362     | 0.028845197 |
| 16         | rs1546586  | 0.358423  | 0.311925     | 0.028845197 |
| 1          | rs2820046  | 0.176259  | 0.140668     | 0.028860994 |
| 2          | rs2709590  | 0.449821  | 0.498636     | 0.028860994 |
| 2          | rs4670467  | 0.146953  | 0.114754     | 0.028860994 |
| 3          | rs9863185  | 0.105735  | 0.0786517    | 0.028860994 |
| 4          | rs1402481  | 0.439068  | 0.390231     | 0.028860994 |
| 9          | rs2997685  | 0.0773381 | 0.108348     | 0.028860994 |
| 11         | rs4910511  | 0.37276   | 0.325665     | 0.028860994 |
| 16         | rs906796   | 0.320144  | 0.368601     | 0.028860994 |
| 3          | rs9862864  | 0.193548  | 0.236035     | 0.0288768   |

Table DS2: All SNPs tested for association (RDC SABP vs. controls) with the Cochran-Armitage trend test and significant at the p=0.05 threshold.

| chromosome | SNP        | MAF_cases | MAF_controls | p_value     |
|------------|------------|-----------|--------------|-------------|
| 8          | rs1545876  | 0.102151  | 0.0750085    | 0.0288768   |
| 15         | rs3784374  | 0.129032  | 0.0987402    | 0.0288768   |
| 1          | rs17332279 | 0.148746  | 0.116695     | 0.028892615 |
| 7          | rs2721777  | 0.326165  | 0.281144     | 0.028892615 |
| 7          | rs2267710  | 0.267025  | 0.313224     | 0.028892615 |
| 8          | rs7812965  | 0.261649  | 0.307862     | 0.028892615 |
| 2          | rs11887366 | 0.193141  | 0.235354     | 0.028908439 |
| 3          | rs7648156  | 0.485663  | 0.435753     | 0.028908439 |
| 12         | rs1965297  | 0.419355  | 0.469346     | 0.028908439 |
| 13         | rs3803264  | 0.301075  | 0.348242     | 0.028908439 |
| 18         | rs1442075  | 0.324373  | 0.279462     | 0.028908439 |
| 22         | rs16983971 | 0.241935  | 0.201396     | 0.028908439 |
| 3          | rs7646775  | 0.166667  | 0.206503     | 0.028924272 |
| 5          | rs1376855  | 0.385305  | 0.33816      | 0.028924272 |
| 8          | rs1679666  | 0.145161  | 0.183339     | 0.028924272 |
| 12         | rs4767708  | 0.354839  | 0.308819     | 0.028924272 |
| 13         | rs4238266  | 0.159498  | 0.125894     | 0.028924272 |
| 16         | rs12444627 | 0.0896057 | 0.0645656    | 0.028924272 |
| 20         | rs4603839  | 0.261649  | 0.307732     | 0.028924272 |
| 1          | rs2282322  | 0.197133  | 0.160477     | 0.028940115 |
| 2          | rs6718558  | 0.392086  | 0.442039     | 0.028940115 |
| 8          | rs4541896  | 0.168459  | 0.208419     | 0.028940115 |
| 13         | rs9509161  | 0.274194  | 0.231832     | 0.028940115 |
| 15         | rs4932474  | 0.369176  | 0.417575     | 0.028940115 |
| 16         | rs2343519  | 0.197842  | 0.24081      | 0.028940115 |
| 3          | rs12152513 | 0.33574   | 0.384169     | 0.028955966 |
| 3          | rs1105076  | 0.0430108 | 0.0679727    | 0.028955966 |
| 11         | rs7932890  | 0.21147   | 0.173476     | 0.028955966 |
| 12         | rs10845472 | 0.238351  | 0.282453     | 0.028955966 |
| 18         | rs595997   | 0.146953  | 0.184712     | 0.028955966 |
| 2          | rs1921668  | 0.27518   | 0.322438     | 0.028971826 |
| 4          | rs1014932  | 0.31362   | 0.269349     | 0.028971826 |
| 4          | rs1433216  | 0.512545  | 0.461853     | 0.028971826 |
| 4          | rs10019614 | 0.421147  | 0.373297     | 0.028971826 |
| 6          | rs9359682  | 0.311151  | 0.359237     | 0.028971826 |
| 8          | rs11787434 | 0.19964   | 0.162581     | 0.028971826 |
| 11         | rs11025798 | 0.376344  | 0.425383     | 0.028971826 |
| 5          | rs6894815  | 0.519784  | 0.470508     | 0.028987695 |
| 11         | rs2897525  | 0.194946  | 0.237048     | 0.028987695 |
| 17         | rs3826529  | 0.44086   | 0.491479     | 0.028987695 |
| 17         | rs9898649  | 0.123656  | 0.0942078    | 0.028987695 |
| 1          | rs298151   | 0.31295   | 0.269074     | 0.029003574 |
| 8          | rs10955383 | 0.310036  | 0.266099     | 0.029003574 |
| 2          | rs17327578 | 0.173835  | 0.139003     | 0.029019461 |
| 7          | rs4722309  | 0.386282  | 0.435775     | 0.029019461 |
| 9          | rs10793904 | 0.367384  | 0.320491     | 0.029019461 |
| 1          | rs637168   | 0.132616  | 0.16985      | 0.029035358 |
| 1          | rs1539438  | 0.277778  | 0.324513     | 0.029035358 |
| 2          | rs7563796  | 0.154122  | 0.121042     | 0.029035358 |
| 2          | rs6433658  | 0.271583  | 0.229131     | 0.029035358 |
| 2          | rs12613195 | 0.293907  | 0.34111      | 0.029035358 |
| 6          | rs7767502  | 0.173835  | 0.139353     | 0.029035358 |

Table DS2: All SNPs tested for association (RDC SABP vs. controls) with the Cochran-Armitage trend test and significant at the p=0.05 threshold.

| chromosome | SNP        | MAF_cases | MAF_controls | p_value     |
|------------|------------|-----------|--------------|-------------|
| 3          | rs9864057  | 0.256272  | 0.215503     | 0.029051263 |
| 3          | rs12493050 | 0.240143  | 0.199898     | 0.029051263 |
| 4          | rs1837655  | 0.306452  | 0.262432     | 0.029051263 |
| 6          | rs9503011  | 0.0716846 | 0.0496937    | 0.029051263 |
| 11         | rs643744   | 0.343525  | 0.297343     | 0.029051263 |
| 16         | rs16962157 | 0.109319  | 0.0815143    | 0.029051263 |
| 21         | rs2823061  | 0.5       | 0.450205     | 0.029051263 |
| 22         | rs5753105  | 0.281362  | 0.238257     | 0.029051263 |
| 1          | rs10493414 | 0.362007  | 0.411985     | 0.029067178 |
| 1          | rs3010370  | 0.234767  | 0.279802     | 0.029067178 |
| 1          | rs2820026  | 0.173285  | 0.138066     | 0.029083102 |
| 3          | rs17788518 | 0.409747  | 0.459086     | 0.029083102 |
| 10         | rs7922151  | 0.206093  | 0.248808     | 0.029083102 |
| 11         | rs4756756  | 0.521505  | 0.471749     | 0.029083102 |
| 11         | rs17149234 | 0.12724   | 0.0976068    | 0.029083102 |
| 17         | rs1448     | 0.413669  | 0.365804     | 0.029083102 |
| 2          | rs4446018  | 0.532258  | 0.482806     | 0.029099034 |
| 5          | rs7719851  | 0.453237  | 0.503242     | 0.029099034 |
| 5          | rs1909705  | 0.222222  | 0.265961     | 0.029099034 |
| 8          | rs6991513  | 0.267025  | 0.225213     | 0.029099034 |
| 14         | rs2079505  | 0.369176  | 0.418399     | 0.029099034 |
| 17         | rs12944809 | 0.0734767 | 0.103131     | 0.029099034 |
| 4          | rs6827754  | 0.370968  | 0.419163     | 0.029114976 |
| 5          | rs2397714  | 0.173835  | 0.215065     | 0.029114976 |
| 11         | rs3942852  | 0.164875  | 0.20446      | 0.029114976 |
| 18         | rs8087849  | 0.408273  | 0.360307     | 0.029114976 |
| 5          | rs26998    | 0.282374  | 0.239789     | 0.029130927 |
| 7          | rs5005919  | 0.444444  | 0.494194     | 0.029130927 |
| 12         | rs10843993 | 0.107527  | 0.141763     | 0.029130927 |
| 16         | rs2133804  | 0.464158  | 0.415303     | 0.029130927 |
| 3          | rs7616180  | 0.224014  | 0.267711     | 0.029146887 |
| 5          | rs7735361  | 0.25      | 0.295369     | 0.029146887 |
| 9          | rs12238738 | 0.34767   | 0.396181     | 0.029146887 |
| 22         | rs2186370  | 0.223022  | 0.183691     | 0.029146887 |
| 4          | rs10866213 | 0.238351  | 0.198672     | 0.029162857 |
| 5          | rs6860505  | 0.359712  | 0.408299     | 0.029162857 |
| 6          | rs9504737  | 0.100719  | 0.0743703    | 0.029162857 |
| 1          | rs6696853  | 0.102518  | 0.136503     | 0.029178835 |
| 4          | rs230529   | 0.451439  | 0.402726     | 0.029178835 |
| 7          | rs2335167  | 0.482079  | 0.433435     | 0.029178835 |
| 17         | rs12150054 | 0.136201  | 0.105425     | 0.029178835 |
| 1          | rs2789716  | 0.218638  | 0.262351     | 0.029194822 |
| 5          | rs1991519  | 0.223022  | 0.266792     | 0.029194822 |
| 7          | rs7791794  | 0.136201  | 0.105111     | 0.029194822 |
| 8          | rs4909374  | 0.385305  | 0.435116     | 0.029194822 |
| 12         | rs10849014 | 0.247312  | 0.207114     | 0.029194822 |
| 12         | rs697869   | 0.501792  | 0.452519     | 0.029194822 |
| 13         | rs9302001  | 0.401079  | 0.353883     | 0.029194822 |
| 14         | rs2210179  | 0.318345  | 0.366735     | 0.029194822 |
| 3          | rs9882153  | 0.143369  | 0.181478     | 0.029210819 |
| 3          | rs7373907  | 0.0899281 | 0.0648464    | 0.029210819 |
| 3          | rs10513813 | 0.0698925 | 0.0480736    | 0.029210819 |



Table DS2: All SNPs tested for association (RDC SABP vs. controls) with the Cochran-Armitage trend test and significant at the p=0.05 threshold.

| chromosome | SNP        | MAF_cases | MAF_controls | p_value     |
|------------|------------|-----------|--------------|-------------|
| 1          | rs6537852  | 0.120504  | 0.091451     | 0.029226825 |
| 1          | rs2807875  | 0.363799  | 0.412326     | 0.029226825 |
| 4          | rs7660113  | 0.483871  | 0.434775     | 0.029226825 |
| 6          | rs12198605 | 0.204301  | 0.16735      | 0.029226825 |
| 6          | rs12178740 | 0.106115  | 0.1403       | 0.029226825 |
| 18         | rs4800973  | 0.408602  | 0.36077      | 0.029226825 |
| 20         | rs3761218  | 0.349462  | 0.397344     | 0.029226825 |
| 2          | rs11680216 | 0.530576  | 0.480586     | 0.029242839 |
| 2          | rs4605311  | 0.464029  | 0.415361     | 0.029242839 |
| 5          | rs335212   | 0.0595668 | 0.0872014    | 0.029242839 |
| 13         | rs2991465  | 0.25448   | 0.299693     | 0.029242839 |
| 15         | rs7165446  | 0.439068  | 0.389683     | 0.029242839 |
| 3          | rs16831500 | 0.0896057 | 0.0648842    | 0.029258863 |
| 4          | rs1597473  | 0.351254  | 0.305252     | 0.029258863 |
| 5          | rs457961   | 0.143369  | 0.181555     | 0.029258863 |
| 3          | rs3821379  | 0.265233  | 0.311755     | 0.029274896 |
| 5          | rs17454632 | 0.272563  | 0.230245     | 0.029274896 |
| 10         | rs11254908 | 0.356631  | 0.405281     | 0.029274896 |
| 11         | rs1353465  | 0.494604  | 0.445997     | 0.029274896 |
| 18         | rs7243135  | 0.440647  | 0.392845     | 0.029274896 |
| 4          | rs2218000  | 0.148746  | 0.187287     | 0.029290939 |
| 4          | rs1437844  | 0.419355  | 0.370446     | 0.029290939 |
| 2          | rs4852620  | 0.0860215 | 0.117667     | 0.02930699  |
| 6          | rs1884270  | 0.113309  | 0.148142     | 0.02930699  |
| 7          | rs2968854  | 0.281362  | 0.239168     | 0.02930699  |
| 2          | rs10194273 | 0.172043  | 0.212338     | 0.029323051 |
| 8          | rs17801625 | 0.215827  | 0.178134     | 0.029323051 |
| 8          | rs17321459 | 0.335125  | 0.289447     | 0.029323051 |
| 10         | rs16905928 | 0.132616  | 0.101943     | 0.029323051 |
| 11         | rs12286769 | 0.413978  | 0.463228     | 0.029323051 |
| 1          | rs1499678  | 0.397482  | 0.447037     | 0.02933912  |
| 3          | rs11914870 | 0.21147   | 0.173876     | 0.02933912  |
| 4          | rs11725660 | 0.173835  | 0.214845     | 0.02933912  |
| 10         | rs7080111  | 0.353047  | 0.401807     | 0.02933912  |
| 11         | rs11226019 | 0.100358  | 0.133402     | 0.02933912  |
| 3          | rs1384175  | 0.44086   | 0.49029      | 0.029355199 |
| 4          | rs4864440  | 0.383513  | 0.432833     | 0.029355199 |
| 5          | rs16896083 | 0.240143  | 0.284935     | 0.029355199 |
| 5          | rs4580755  | 0.334532  | 0.382735     | 0.029355199 |
| 5          | rs1978629  | 0.421147  | 0.470889     | 0.029355199 |
| 8          | rs17150478 | 0.220217  | 0.181493     | 0.029355199 |
| 10         | rs2668902  | 0.0376344 | 0.0609673    | 0.029355199 |
| 3          | rs1438545  | 0.326165  | 0.280504     | 0.029371287 |
| 4          | rs1510738  | 0.159498  | 0.126194     | 0.029371287 |
| 13         | rs6490838  | 0.193141  | 0.235705     | 0.029371287 |
| 6          | rs3102966  | 0.428058  | 0.37934      | 0.029387385 |
| 2          | rs6743363  | 0.11828   | 0.154239     | 0.029403491 |
| 2          | rs12619896 | 0.46595   | 0.416894     | 0.029403491 |
| 7          | rs6971879  | 0.175627  | 0.216354     | 0.029403491 |
| 7          | rs304763   | 0.336918  | 0.385442     | 0.029403491 |
| 10         | rs10732812 | 0.52509   | 0.475273     | 0.029403491 |
| 18         | rs478743   | 0.358423  | 0.407698     | 0.029403491 |

Table DS2: All SNPs tested for association (RDC SABP vs. controls) with the Cochran-Armitage trend test and significant at the p=0.05 threshold.

| chromosome | SNP           | MAF_cases | MAF_controls | p_value     |
|------------|---------------|-----------|--------------|-------------|
| 2          | rs318362      | 0.412186  | 0.364271     | 0.029419607 |
| 13         | SNP_A-2205921 | 0.327957  | 0.283356     | 0.029419607 |
| 1          | rs10752857    | 0.387097  | 0.339578     | 0.029435732 |
| 1          | rs9427698     | 0.139785  | 0.108214     | 0.029435732 |
| 4          | rs1549443     | 0.329749  | 0.377982     | 0.029435732 |
| 7          | rs3800962     | 0.379928  | 0.429083     | 0.029435732 |
| 7          | rs856554      | 0.21223   | 0.255106     | 0.029435732 |
| 7          | rs438660      | 0.0935252 | 0.126362     | 0.029435732 |
| 10         | rs7087980     | 0.314748  | 0.362087     | 0.029435732 |
| 13         | rs9565393     | 0.251799  | 0.297753     | 0.029435732 |
| 17         | rs2877762     | 0.0340502 | 0.0564269    | 0.029435732 |
| 20         | rs383329      | 0.213262  | 0.256646     | 0.029435732 |
| 22         | rs11090751    | 0.107914  | 0.142127     | 0.029435732 |
| 4          | rs752970      | 0.161871  | 0.128542     | 0.029451866 |
| 11         | rs7110568     | 0.218638  | 0.179959     | 0.029451866 |
| 12         | rs11179324    | 0.25      | 0.295431     | 0.029451866 |
| 2          | rs16984221    | 0.0716846 | 0.101124     | 0.029468009 |
| 6          | rs11754064    | 0.372302  | 0.326673     | 0.029468009 |
| 10         | rs10996893    | 0.166667  | 0.206154     | 0.029468009 |
| 20         | rs6036748     | 0.268817  | 0.227474     | 0.029468009 |
| 2          | rs1448317     | 0.0358423 | 0.0584128    | 0.029484161 |
| 13         | rs9550642     | 0.112319  | 0.0844422    | 0.029484161 |
| 1          | rs6696547     | 0.439068  | 0.390157     | 0.029500323 |
| 5          | rs1582420     | 0.182796  | 0.147239     | 0.029500323 |
| 6          | rs7750835     | 0.078853  | 0.109332     | 0.029500323 |
| 10         | rs2488576     | 0.286738  | 0.333333     | 0.029500323 |
| 10         | rs7895609     | 0.292115  | 0.249062     | 0.029500323 |
| 20         | rs3817877     | 0.22043   | 0.181322     | 0.029500323 |
| 2          | rs6751330     | 0.4319    | 0.384103     | 0.029516494 |
| 4          | rs16990587    | 0.157706  | 0.125213     | 0.029516494 |
| 22         | rs5767670     | 0.410394  | 0.362304     | 0.029516494 |
| 2          | rs837839      | 0.336918  | 0.385456     | 0.029532674 |
| 3          | rs13063547    | 0.252688  | 0.212168     | 0.029532674 |
| 5          | rs1866390     | 0.250896  | 0.296113     | 0.029532674 |
| 6          | rs10484940    | 0.412186  | 0.363977     | 0.029532674 |
| 14         | rs7146988     | 0.0716846 | 0.101057     | 0.029532674 |
| 20         | rs6068345     | 0.239209  | 0.283328     | 0.029532674 |
| 12         | rs1119678     | 0.428315  | 0.380109     | 0.029548864 |
| 16         | rs10500388    | 0.222222  | 0.183458     | 0.029548864 |
| 2          | rs2077783     | 0.478495  | 0.429253     | 0.029565062 |
| 8          | rs4609225     | 0.424731  | 0.376106     | 0.029565062 |
| 9          | rs11140836    | 0.0698925 | 0.0992847    | 0.029565062 |
| 2          | rs6717924     | 0.164875  | 0.131391     | 0.02958127  |
| 2          | rs17226763    | 0.304659  | 0.352199     | 0.02958127  |
| 4          | rs10005921    | 0.335125  | 0.383345     | 0.02958127  |
| 13         | rs6490820     | 0.145161  | 0.183413     | 0.02958127  |
| 2          | rs2901908     | 0.168459  | 0.134412     | 0.029597487 |
| 8          | rs2590467     | 0.182796  | 0.146928     | 0.029597487 |
| 12         | rs11050511    | 0.102518  | 0.0762278    | 0.029597487 |
| 14         | rs17769866    | 0.0376344 | 0.0611584    | 0.029597487 |
| 17         | rs11077558    | 0.123656  | 0.15906      | 0.029597487 |
| 1          | rs197427      | 0.411871  | 0.46167      | 0.029613714 |

Table DS2: All SNPs tested for association (RDC SABP vs. controls) with the Cochran-Armitage trend test and significant at the p=0.05 threshold.

| chromosome | SNP        | MAF_cases | MAF_controls | p_value     |
|------------|------------|-----------|--------------|-------------|
| 8          | rs7007241  | 0.155914  | 0.195297     | 0.029613714 |
| 10         | rs4880595  | 0.216846  | 0.260722     | 0.029613714 |
| 5          | rs1217765  | 0.249104  | 0.294348     | 0.029629949 |
| 1          | rs11102372 | 0.408602  | 0.359993     | 0.029646194 |
| 2          | rs10197232 | 0.541219  | 0.490447     | 0.029646194 |
| 3          | rs4381987  | 0.0878136 | 0.0635434    | 0.029646194 |
| 13         | rs238270   | 0.308244  | 0.355635     | 0.029646194 |
| 5          | rs17207212 | 0.213262  | 0.175519     | 0.029662449 |
| 17         | rs7215210  | 0.132616  | 0.10242      | 0.029662449 |
| 2          | rs12463406 | 0.0806452 | 0.111755     | 0.029678712 |
| 9          | rs4421419  | 0.143369  | 0.181029     | 0.029678712 |
| 12         | rs4765525  | 0.103943  | 0.138008     | 0.029678712 |
| 13         | rs11616518 | 0.166667  | 0.132834     | 0.029678712 |
| 14         | rs2243751  | 0.062724  | 0.0906453    | 0.029678712 |
| 15         | rs16965650 | 0.392473  | 0.345039     | 0.029678712 |
| 21         | rs2829542  | 0.451439  | 0.501364     | 0.029678712 |
| 2          | rs970308   | 0.274194  | 0.231425     | 0.029694985 |
| 2          | rs1979028  | 0.327957  | 0.282601     | 0.029694985 |
| 3          | rs4854828  | 0.0860215 | 0.118358     | 0.029694985 |
| 13         | rs9546505  | 0.386691  | 0.435945     | 0.029694985 |
| 4          | rs1380425  | 0.149281  | 0.187841     | 0.029711267 |
| 7          | rs10248542 | 0.491007  | 0.441658     | 0.029711267 |
| 8          | rs11779768 | 0.385305  | 0.338501     | 0.029711267 |
| 10         | rs3911781  | 0.166065  | 0.205552     | 0.029711267 |
| 11         | rs11041186 | 0.0842294 | 0.0602184    | 0.029711267 |
| 14         | rs17183738 | 0.112903  | 0.148072     | 0.029711267 |
| 15         | rs1393943  | 0.374552  | 0.423195     | 0.029711267 |
| 3          | rs1522457  | 0.310036  | 0.357873     | 0.029727559 |
| 5          | rs6871772  | 0.4319    | 0.384065     | 0.029727559 |
| 2          | rs447721   | 0.315412  | 0.362785     | 0.029743859 |
| 3          | rs6439158  | 0.0752688 | 0.105389     | 0.029743859 |
| 13         | rs1410738  | 0.419065  | 0.468835     | 0.029743859 |
| 16         | rs1039330  | 0.220217  | 0.181601     | 0.029743859 |
| 19         | rs17684904 | 0.0935252 | 0.12671      | 0.029743859 |
| 1          | rs1572495  | 0.114695  | 0.0865417    | 0.029760169 |
| 1          | rs1341988  | 0.301075  | 0.348382     | 0.029760169 |
| 3          | rs11926976 | 0.413978  | 0.463531     | 0.029760169 |
| 4          | rs2232028  | 0.410394  | 0.460661     | 0.029760169 |
| 5          | rs463803   | 0.143369  | 0.181431     | 0.029760169 |
| 6          | rs1180208  | 0.449821  | 0.40109      | 0.029760169 |
| 12         | rs10878697 | 0.164875  | 0.204731     | 0.029760169 |
| 19         | rs7248035  | 0.0913978 | 0.123978     | 0.029760169 |
| 2          | rs11691702 | 0.175627  | 0.141104     | 0.029776489 |
| 2          | rs219145   | 0.361511  | 0.315162     | 0.029776489 |
| 2          | rs2711452  | 0.385305  | 0.338847     | 0.029776489 |
| 12         | rs12424054 | 0.273381  | 0.230939     | 0.029776489 |
| 13         | rs1981125  | 0.136201  | 0.173891     | 0.029776489 |
| 7          | rs10260177 | 0.136691  | 0.105523     | 0.029792817 |
| 16         | rs720763   | 0.358423  | 0.311777     | 0.029792817 |
| 17         | rs8064435  | 0.167266  | 0.207608     | 0.029792817 |
| 19         | rs1533674  | 0.280576  | 0.327768     | 0.029792817 |
| 19         | rs11084544 | 0.170863  | 0.211047     | 0.029792817 |

Table DS2 All SNPs tested for association (RDC SABP vs. controls) with the Cochran-Armitage trend test and significant at the p=0.05 threshold.

| chromosome | SNP        | MAF_cases | MAF_controls | p_value     |
|------------|------------|-----------|--------------|-------------|
| 4          | rs1531327  | 0.181004  | 0.221767     | 0.029809155 |
| 6          | rs565450   | 0.220217  | 0.181369     | 0.029809155 |
| 11         | rs10742829 | 0.164875  | 0.20429      | 0.029809155 |
| 11         | rs11224685 | 0.0430108 | 0.0674617    | 0.029809155 |
| 18         | rs2053519  | 0.21147   | 0.254688     | 0.029809155 |
| 2          | rs837841   | 0.336918  | 0.385363     | 0.029825503 |
| 12         | rs11058001 | 0.136201  | 0.104905     | 0.029825503 |
| 2          | rs1379020  | 0.0412186 | 0.0652026    | 0.029841859 |
| 3          | rs1320158  | 0.16426   | 0.204197     | 0.029841859 |
| 3          | rs3821895  | 0.268817  | 0.3145       | 0.029841859 |
| 5          | rs153012   | 0.246403  | 0.206303     | 0.029841859 |
| 5          | rs6872437  | 0.295699  | 0.341567     | 0.029841859 |
| 6          | rs7758230  | 0.204301  | 0.16678      | 0.029841859 |
| 8          | rs1364960  | 0.367384  | 0.320456     | 0.029841859 |
| 4          | rs218162   | 0.312727  | 0.268417     | 0.029858225 |
| 5          | rs10940489 | 0.539568  | 0.488923     | 0.029858225 |
| 14         | rs734313   | 0.482079  | 0.432981     | 0.029858225 |
| 18         | rs922048   | 0.349462  | 0.397375     | 0.029858225 |
| 1          | rs12045240 | 0.31295   | 0.360893     | 0.029874601 |
| 2          | rs6717207  | 0.0609319 | 0.0890061    | 0.029874601 |
| 5          | rs11738925 | 0.451613  | 0.403643     | 0.029874601 |
| 8          | rs7007275  | 0.374552  | 0.327774     | 0.029874601 |
| 14         | rs2079506  | 0.368705  | 0.417804     | 0.029874601 |
| 15         | rs871505   | 0.378136  | 0.427058     | 0.029874601 |
| 3          | rs1949350  | 0.318996  | 0.366826     | 0.029890986 |
| 6          | rs9459593  | 0.255396  | 0.300307     | 0.029890986 |
| 7          | rs579049   | 0.191756  | 0.155313     | 0.029890986 |
| 13         | rs9581774  | 0.234767  | 0.279141     | 0.029890986 |
| 3          | rs1716741  | 0.155914  | 0.195392     | 0.02990738  |
| 3          | rs3772884  | 0.349462  | 0.303748     | 0.02990738  |
| 13         | rs9511625  | 0.172043  | 0.211486     | 0.02990738  |
| 16         | rs17410049 | 0.149281  | 0.188012     | 0.02990738  |
| 16         | rs1230     | 0.366906  | 0.415474     | 0.02990738  |
| 4          | rs11930917 | 0.15233   | 0.119809     | 0.029923783 |
| 7          | rs1639481  | 0.380866  | 0.429033     | 0.029923783 |
| 14         | rs10130192 | 0.455036  | 0.406303     | 0.029923783 |
| 2          | rs4267549  | 0.339928  | 0.29523      | 0.029940196 |
| 3          | rs2271492  | 0.232975  | 0.193449     | 0.029940196 |
| 5          | rs7722980  | 0.516187  | 0.466712     | 0.029956618 |
| 9          | rs1538769  | 0.258123  | 0.216672     | 0.029956618 |
| 12         | rs11048606 | 0.0645161 | 0.0929083    | 0.029956618 |
| 14         | rs8015242  | 0.193548  | 0.235094     | 0.029956618 |
| 16         | rs1110528  | 0.297491  | 0.344399     | 0.029956618 |
| 4          | rs716201   | 0.249104  | 0.294338     | 0.02997305  |
| 6          | rs1328691  | 0.469534  | 0.420667     | 0.02997305  |
| 3          | rs11130100 | 0.516245  | 0.466417     | 0.029989491 |
| 5          | rs158704   | 0.105735  | 0.139891     | 0.029989491 |
| 9          | rs10972365 | 0.303957  | 0.260655     | 0.029989491 |
| 7          | rs1996161  | 0.33871   | 0.292462     | 0.030005941 |
| 11         | rs682120   | 0.354839  | 0.308177     | 0.030005941 |
| 22         | rs1441033  | 0.133094  | 0.102866     | 0.030005941 |
| 2          | rs1460665  | 0.0878136 | 0.11998      | 0.030022401 |

Table DS2: All SNPs tested for association (RDC SABP vs. controls) with the Cochran-Armitage trend test and significant at the p=0.05 threshold.

| chromosome | SNP        | MAF_cases | MAF_controls | p_value     |
|------------|------------|-----------|--------------|-------------|
| 4          | rs654576   | 0.143885  | 0.112095     | 0.030022401 |
| 9          | rs1931321  | 0.143885  | 0.181555     | 0.030022401 |
| 12         | rs2127205  | 0.435252  | 0.484455     | 0.030022401 |
| 12         | rs2188399  | 0.353047  | 0.402044     | 0.030022401 |
| 1          | rs4240896  | 0.422662  | 0.375724     | 0.03003887  |
| 3          | rs4411908  | 0.406475  | 0.359237     | 0.03003887  |
| 9          | rs1327878  | 0.258993  | 0.217621     | 0.03003887  |
| 15         | rs7171889  | 0.107527  | 0.0800681    | 0.03003887  |
| 2          | rs899846   | 0.143369  | 0.111811     | 0.030055349 |
| 18         | rs6566942  | 0.222022  | 0.183276     | 0.030055349 |
| 5          | rs40046    | 0.349638  | 0.303821     | 0.030071837 |
| 6          | rs1890954  | 0.273381  | 0.319544     | 0.030071837 |
| 6          | rs16882214 | 0.09319   | 0.126149     | 0.030071837 |
| 7          | rs1189209  | 0.140288  | 0.108747     | 0.030071837 |
| 11         | rs3858510  | 0.0752688 | 0.104869     | 0.030071837 |
| 11         | rs12291631 | 0.109319  | 0.143661     | 0.030071837 |
| 18         | rs470498   | 0.146953  | 0.184453     | 0.030071837 |
| 22         | rs5756441  | 0.170251  | 0.136487     | 0.030071837 |
| 2          | rs9309541  | 0.534173  | 0.48381      | 0.030088334 |
| 3          | rs12639285 | 0.100358  | 0.0739101    | 0.030088334 |
| 9          | rs7850461  | 0.387097  | 0.339986     | 0.030088334 |
| 16         | rs4843376  | 0.437276  | 0.486717     | 0.030088334 |
| 2          | rs2103226  | 0.274194  | 0.232356     | 0.030104841 |
| 7          | rs10952813 | 0.209091  | 0.170761     | 0.030104841 |
| 11         | rs11223303 | 0.0985663 | 0.0726932    | 0.030104841 |
| 5          | rs847821   | 0.446043  | 0.495911     | 0.030121358 |
| 11         | rs581359   | 0.388889  | 0.437905     | 0.030121358 |
| 5          | rs1421686  | 0.182796  | 0.147379     | 0.030137884 |
| 8          | rs7814222  | 0.305755  | 0.352911     | 0.030137884 |
| 14         | rs11157723 | 0.442652  | 0.491823     | 0.030137884 |
| 20         | rs6049617  | 0.297491  | 0.254598     | 0.030137884 |
| 10         | rs10437496 | 0.160072  | 0.127003     | 0.030154419 |
| 17         | rs17604987 | 0.290323  | 0.247107     | 0.030154419 |
| 2          | rs13394478 | 0.0949821 | 0.127468     | 0.030170963 |
| 4          | rs17753973 | 0.125448  | 0.161219     | 0.030170963 |
| 4          | rs3828502  | 0.350719  | 0.399522     | 0.030170963 |
| 8          | rs17365982 | 0.0806452 | 0.0576989    | 0.030170963 |
| 1          | rs10802598 | 0.0394265 | 0.0630324    | 0.030187518 |
| 4          | rs11723176 | 0.350719  | 0.305451     | 0.030187518 |
| 6          | rs9386144  | 0.16129   | 0.200715     | 0.030187518 |
| 7          | rs11763514 | 0.216846  | 0.178474     | 0.030187518 |
| 11         | rs7114303  | 0.362007  | 0.315996     | 0.030187518 |
| 6          | rs9479942  | 0.0394265 | 0.062649     | 0.030204081 |
| 15         | rs2433283  | 0.215054  | 0.176941     | 0.030204081 |
| 20         | rs6063929  | 0.142086  | 0.180314     | 0.030204081 |
| 7          | rs11773503 | 0.397849  | 0.446678     | 0.030220654 |
| 14         | rs17096618 | 0.406475  | 0.358577     | 0.030220654 |
| 1          | rs7667     | 0.304659  | 0.35206      | 0.030237237 |
| 1          | rs10443904 | 0.202509  | 0.24463      | 0.030237237 |
| 3          | rs6767708  | 0.209677  | 0.252384     | 0.030237237 |
| 10         | rs11259762 | 0.34767   | 0.302282     | 0.030237237 |
| 10         | rs7475474  | 0.374552  | 0.422972     | 0.030237237 |

Table DS2: All SNPs tested for association (RDC SABP vs. controls) with the Cochran-Armitage trend test and significant at the p=0.05 threshold.

| chromosome | SNP           | MAF_cases | MAF_controls | p_value     |
|------------|---------------|-----------|--------------|-------------|
| 12         | rs2430605     | 0.392473  | 0.441928     | 0.030237237 |
| 13         | rs7328345     | 0.197133  | 0.239182     | 0.030237237 |
| 1          | rs1338188     | 0.120072  | 0.155537     | 0.030253829 |
| 2          | rs7603585     | 0.206093  | 0.249489     | 0.030253829 |
| 2          | rs4674516     | 0.251799  | 0.21058      | 0.030253829 |
| 7          | rs1544011     | 0.514337  | 0.46487      | 0.030253829 |
| 8          | rs2022958     | 0.53405   | 0.484998     | 0.030253829 |
| 11         | rs532781      | 0.336918  | 0.384707     | 0.030253829 |
| 2          | rs6430791     | 0.227599  | 0.271394     | 0.030270431 |
| 3          | rs16843947    | 0.370504  | 0.419223     | 0.030270431 |
| 10         | rs10885514    | 0.270609  | 0.228698     | 0.030270431 |
| 11         | rs7479713     | 0.223022  | 0.183986     | 0.030270431 |
| 16         | rs12923268    | 0.464029  | 0.41539      | 0.030270431 |
| 18         | rs13370227    | 0.348921  | 0.303547     | 0.030270431 |
| 2          | rs2970911     | 0.399642  | 0.35189      | 0.030287042 |
| 6          | rs17085896    | 0.177419  | 0.217695     | 0.030287042 |
| 12         | rs3908177     | 0.51259   | 0.463032     | 0.030287042 |
| 17         | rs11650448    | 0.365591  | 0.414593     | 0.030287042 |
| 19         | rs2377288     | 0.158273  | 0.197104     | 0.030287042 |
| 2          | rs11687226    | 0.209677  | 0.252895     | 0.030303662 |
| 6          | rs628134      | 0.378136  | 0.331233     | 0.030303662 |
| 13         | rs12430310    | 0.369176  | 0.323509     | 0.030303662 |
| 13         | rs4771403     | 0.435018  | 0.484998     | 0.030303662 |
| 21         | rs225427      | 0.385305  | 0.433753     | 0.030303662 |
| 1          | rs7172        | 0.137993  | 0.175068     | 0.030320292 |
| 4          | rs1425551     | 0.516129  | 0.466769     | 0.030320292 |
| 2          | rs1515950     | 0.21223   | 0.255457     | 0.030336932 |
| 2          | rs1437873     | 0.145161  | 0.113513     | 0.030336932 |
| 9          | rs555244      | 0.516129  | 0.467621     | 0.030336932 |
| 12         | rs1922752     | 0.345324  | 0.300068     | 0.030336932 |
| 20         | rs6047205     | 0.324373  | 0.279918     | 0.030336932 |
| 1          | rs12081718    | 0.120072  | 0.155472     | 0.030353581 |
| 5          | SNP_A-1796294 | 0.109712  | 0.0820259    | 0.030353581 |
| 5          | rs10476663    | 0.480287  | 0.431246     | 0.030353581 |
| 6          | rs2874334     | 0.196751  | 0.160007     | 0.030353581 |
| 7          | rs9769615     | 0.444444  | 0.395904     | 0.030353581 |
| 20         | rs6024830     | 0.224014  | 0.267462     | 0.030353581 |
| 1          | rs648614      | 0.462366  | 0.414276     | 0.03037024  |
| 3          | rs13091217    | 0.442238  | 0.393722     | 0.03037024  |
| 4          | rs4861387     | 0.27957   | 0.2373       | 0.03037024  |
| 4          | rs17035270    | 0.236559  | 0.197611     | 0.03037024  |
| 10         | rs10829447    | 0.170251  | 0.136286     | 0.03037024  |
| 11         | rs11024098    | 0.261649  | 0.220293     | 0.03037024  |
| 11         | rs687660      | 0.388489  | 0.341297     | 0.03037024  |
| 18         | rs2542176     | 0.301075  | 0.257426     | 0.03037024  |
| 21         | rs2823181     | 0.422939  | 0.472932     | 0.03037024  |
| 2          | rs2239596     | 0.356631  | 0.311263     | 0.030386908 |
| 6          | SNP_A-2118454 | 0.078853  | 0.0556124    | 0.030386908 |
| 5          | rs2004010     | 0.226619  | 0.187734     | 0.030403585 |
| 5          | rs2287655     | 0.182796  | 0.147429     | 0.030403585 |
| 5          | rs6892403     | 0.182796  | 0.147429     | 0.030403585 |
| 10         | rs16909800    | 0.109712  | 0.143733     | 0.030403585 |

Table DS2: All SNPs tested for association (RDC SABP vs. controls) with the Cochran-Armitage trend test and significant at the p=0.05 threshold.

| chromosome | SNP           | MAF_cases | MAF_controls | p_value     |
|------------|---------------|-----------|--------------|-------------|
| 16         | rs16950935    | 0.197133  | 0.238923     | 0.030403585 |
| 20         | rs1293381     | 0.302158  | 0.34896      | 0.030403585 |
| 2          | rs1914030     | 0.145161  | 0.113041     | 0.030420273 |
| 6          | rs17067938    | 0.0734767 | 0.0514305    | 0.030420273 |
| 5          | rs9292856     | 0.200717  | 0.164225     | 0.030436969 |
| 13         | rs9514153     | 0.183453  | 0.225026     | 0.030436969 |
| 15         | rs6495428     | 0.356631  | 0.404292     | 0.030436969 |
| 1          | rs11163400    | 0.158273  | 0.125469     | 0.030453676 |
| 1          | rs10754730    | 0.360215  | 0.409137     | 0.030453676 |
| 3          | rs10935417    | 0.104317  | 0.13796      | 0.030453676 |
| 12         | rs7315852     | 0.246403  | 0.290773     | 0.030453676 |
| 13         | rs1359479     | 0.258123  | 0.216576     | 0.030453676 |
| 17         | rs2969        | 0.216846  | 0.259877     | 0.030453676 |
| 1          | rs574441      | 0.1787    | 0.218942     | 0.030470392 |
| 9          | rs306783      | 0.403226  | 0.451772     | 0.030470392 |
| 10         | rs12768113    | 0.345878  | 0.300649     | 0.030470392 |
| 10         | rs12219156    | 0.127698  | 0.164507     | 0.030470392 |
| 15         | rs6496603     | 0.335125  | 0.382924     | 0.030470392 |
| 20         | rs2284380     | 0.0376344 | 0.0613915    | 0.030470392 |
| 9          | rs10982546    | 0.390681  | 0.343291     | 0.030487117 |
| 11         | rs10766064    | 0.221223  | 0.264846     | 0.030487117 |
| 1          | rs6662879     | 0.103943  | 0.0771984    | 0.030503852 |
| 4          | rs17086692    | 0.259857  | 0.305347     | 0.030503852 |
| 1          | rs12091351    | 0.0866426 | 0.118098     | 0.030520597 |
| 6          | rs585635      | 0.51444   | 0.465723     | 0.030520597 |
| 11         | rs1783919     | 0.286738  | 0.243616     | 0.030520597 |
| 16         | rs247403      | 0.354317  | 0.308547     | 0.030520597 |
| 7          | rs10952923    | 0.349462  | 0.397445     | 0.030537351 |
| 9          | rs4978927     | 0.143885  | 0.181431     | 0.030537351 |
| 11         | rs11603299    | 0.424731  | 0.376834     | 0.030537351 |
| 13         | rs17078956    | 0.197133  | 0.239101     | 0.030554114 |
| 20         | rs8114158     | 0.200717  | 0.163764     | 0.030554114 |
| 11         | rs2283238     | 0.424731  | 0.474097     | 0.030570888 |
| 16         | rs4442833     | 0.142086  | 0.18075      | 0.030570888 |
| 10         | rs793083      | 0.291367  | 0.337829     | 0.030587671 |
| 22         | rs5997062     | 0.384892  | 0.338155     | 0.030587671 |
| 1          | rs16859491    | 0.0323741 | 0.0543441    | 0.030604463 |
| 2          | rs7421552     | 0.12724   | 0.0974446    | 0.030604463 |
| 2          | rs11683100    | 0.0949821 | 0.127428     | 0.030604463 |
| 5          | rs10045029    | 0.0358423 | 0.0581514    | 0.030604463 |
| 6          | rs2626094     | 0.165468  | 0.205521     | 0.030604463 |
| 20         | SNP_A-4300291 | 0.422939  | 0.472743     | 0.030604463 |
| 1          | rs7520755     | 0.352518  | 0.401569     | 0.030621266 |
| 7          | rs4373455     | 0.444444  | 0.493697     | 0.030621266 |
| 8          | rs7837703     | 0.116487  | 0.151159     | 0.030621266 |
| 10         | rs2224532     | 0.195341  | 0.159006     | 0.030621266 |
| 1          | rs349433      | 0.422939  | 0.471541     | 0.030638077 |
| 4          | rs2044018     | 0.0716846 | 0.0498124    | 0.030638077 |
| 6          | rs4463281     | 0.410394  | 0.460307     | 0.030638077 |
| 13         | rs1241671     | 0.250896  | 0.295741     | 0.030638077 |
| 1          | rs6696089     | 0.269784  | 0.315503     | 0.030654899 |
| 5          | rs11949411    | 0.422939  | 0.37517      | 0.030654899 |

Table DS2: All SNPs tested for association (RDC SABP vs. controls) with the Cochran-Armitage trend test and significant at the p=0.05 threshold.

| chromosome | SNP           | MAF_cases | MAF_controls | p_value     |
|------------|---------------|-----------|--------------|-------------|
| 7          | rs2896350     | 0.236559  | 0.19731      | 0.030654899 |
| 9          | rs4977372     | 0.244604  | 0.204468     | 0.030654899 |
| 10         | rs11003114    | 0.18638   | 0.227598     | 0.030654899 |
| 18         | rs949317      | 0.271583  | 0.316803     | 0.030654899 |
| 1          | rs4651066     | 0.0323741 | 0.0544959    | 0.03067173  |
| 2          | rs1561018     | 0.272401  | 0.230638     | 0.03067173  |
| 4          | rs13123027    | 0.38172   | 0.430905     | 0.03067173  |
| 1          | rs955894      | 0.139785  | 0.108348     | 0.03068857  |
| 2          | rs4420663     | 0.159498  | 0.126319     | 0.03068857  |
| 3          | rs9823782     | 0.388889  | 0.342078     | 0.03068857  |
| 5          | rs10515379    | 0.241935  | 0.286592     | 0.03068857  |
| 12         | rs12425238    | 0.148746  | 0.116275     | 0.03068857  |
| 8          | rs2430804     | 0.120072  | 0.155431     | 0.030705421 |
| 10         | rs4746374     | 0.130824  | 0.168086     | 0.030705421 |
| 1          | rs239341      | 0.422939  | 0.47156      | 0.030722281 |
| 5          | rs13165524    | 0.272401  | 0.229983     | 0.030722281 |
| 12         | rs11175257    | 0.0539568 | 0.0802932    | 0.030722281 |
| 16         | rs1498780     | 0.34767   | 0.301941     | 0.030722281 |
| 2          | rs4666429     | 0.0595668 | 0.0872311    | 0.03073915  |
| 2          | rs2395847     | 0.0949821 | 0.127301     | 0.03073915  |
| 4          | rs11100924    | 0.164875  | 0.20477      | 0.03073915  |
| 10         | rs4622208     | 0.353047  | 0.401396     | 0.03073915  |
| 13         | rs12431364    | 0.184588  | 0.149114     | 0.03073915  |
| 2          | rs12619237    | 0.304659  | 0.35189      | 0.03075603  |
| 6          | rs2457336     | 0.363309  | 0.317252     | 0.03075603  |
| 7          | rs12705437    | 0.390681  | 0.440014     | 0.03075603  |
| 8          | rs17367922    | 0.111111  | 0.0831346    | 0.03075603  |
| 10         | rs12772977    | 0.111511  | 0.145997     | 0.03075603  |
| 11         | rs11023689    | 0.492806  | 0.443876     | 0.03075603  |
| 14         | rs8003629     | 0.275986  | 0.233731     | 0.03075603  |
| 18         | rs16957410    | 0.326165  | 0.282082     | 0.03075603  |
| 3          | rs6793043     | 0.265233  | 0.311308     | 0.030772919 |
| 3          | rs6768201     | 0.145161  | 0.183482     | 0.030772919 |
| 5          | rs2933608     | 0.433692  | 0.483464     | 0.030772919 |
| 6          | rs6920375     | 0.444444  | 0.493518     | 0.030772919 |
| 6          | rs9381035     | 0.311828  | 0.358433     | 0.030772919 |
| 7          | rs10242121    | 0.429603  | 0.38166      | 0.030772919 |
| 13         | rs2185964     | 0.143885  | 0.112228     | 0.030772919 |
| 6          | rs3127194     | 0.428058  | 0.379727     | 0.030789817 |
| 18         | SNP_A-1805881 | 0.141577  | 0.110109     | 0.030789817 |
| 2          | rs6720459     | 0.136691  | 0.105658     | 0.030806725 |
| 6          | rs3129932     | 0.27957   | 0.236698     | 0.030806725 |
| 13         | rs7996230     | 0.326165  | 0.374063     | 0.030806725 |
| 20         | rs6063881     | 0.234767  | 0.278345     | 0.030806725 |
| 13         | rs17604530    | 0.078853  | 0.0558393    | 0.030823643 |
| 17         | rs2018675     | 0.290323  | 0.337483     | 0.030823643 |
| 20         | rs8173        | 0.228417  | 0.272526     | 0.030823643 |
| 3          | rs9825983     | 0.327957  | 0.376065     | 0.030840571 |
| 6          | rs6453848     | 0.286738  | 0.333277     | 0.030840571 |
| 7          | rs17143933    | 0.16129   | 0.200443     | 0.030840571 |
| 7          | rs12704036    | 0.259857  | 0.304978     | 0.030840571 |
| 16         | rs11150206    | 0.284946  | 0.242512     | 0.030840571 |



Table DS2: All SNPs tested for association (RDC SABP vs. controls) with the Cochran-Armitage trend test and significant at the p=0.05 threshold.

| chromosome | SNP        | MAF_cases | MAF_controls | p_value     |
|------------|------------|-----------|--------------|-------------|
| 5          | rs463750   | 0.143885  | 0.181741     | 0.030857508 |
| 5          | rs185258   | 0.0573477 | 0.0848412    | 0.030857508 |
| 5          | rs6866664  | 0.120072  | 0.0916525    | 0.030857508 |
| 6          | rs2126237  | 0.146953  | 0.114729     | 0.030857508 |
| 7          | rs10277199 | 0.0505415 | 0.0764646    | 0.030857508 |
| 10         | rs2384044  | 0.16787   | 0.207637     | 0.030857508 |
| 1          | rs4659544  | 0.0722022 | 0.101874     | 0.030874455 |
| 2          | rs10497602 | 0.114695  | 0.149523     | 0.030874455 |
| 3          | rs12635525 | 0.456989  | 0.408348     | 0.030874455 |
| 6          | rs4959200  | 0.144404  | 0.112534     | 0.030874455 |
| 9          | rs1006280  | 0.264388  | 0.309264     | 0.030874455 |
| 20         | rs2422669  | 0.139785  | 0.176902     | 0.030874455 |
| 1          | rs2292275  | 0.297491  | 0.344422     | 0.030891412 |
| 3          | rs6437794  | 0.442652  | 0.394683     | 0.030891412 |
| 4          | rs2086242  | 0.160072  | 0.126749     | 0.030891412 |
| 7          | rs7778443  | 0.342294  | 0.390423     | 0.030891412 |
| 9          | rs4979455  | 0.422662  | 0.471721     | 0.030891412 |
| 16         | rs1972577  | 0.421147  | 0.470869     | 0.030891412 |
| 16         | rs1894879  | 0.299283  | 0.345603     | 0.030891412 |
| 16         | rs6564664  | 0.460432  | 0.411584     | 0.030891412 |
| 1          | rs2767515  | 0.412186  | 0.461683     | 0.030908379 |
| 5          | rs10515140 | 0.261649  | 0.307404     | 0.030908379 |
| 7          | rs3887998  | 0.353047  | 0.401533     | 0.030908379 |
| 14         | rs1046311  | 0.154676  | 0.193306     | 0.030908379 |
| 15         | rs4380011  | 0.375899  | 0.329472     | 0.030908379 |
| 17         | rs203098   | 0.224014  | 0.268143     | 0.030908379 |
| 5          | rs4705377  | 0.367384  | 0.416326     | 0.030925355 |
| 7          | rs842449   | 0.138989  | 0.10774      | 0.030925355 |
| 18         | rs9955907  | 0.157706  | 0.196732     | 0.030925355 |
| 20         | rs197196   | 0.344086  | 0.39186      | 0.030925355 |
| 3          | rs17038576 | 0.0967742 | 0.12934      | 0.030942341 |
| 4          | rs11727749 | 0.099278  | 0.132458     | 0.030942341 |
| 18         | rs1811441  | 0.320789  | 0.276414     | 0.030942341 |
| 22         | rs882442   | 0.242806  | 0.28681      | 0.030942341 |
| 7          | rs1862871  | 0.238351  | 0.198945     | 0.030959336 |
| 8          | rs6999153  | 0.491039  | 0.442249     | 0.030959336 |
| 13         | rs12869136 | 0.249097  | 0.294499     | 0.030959336 |
| 2          | rs17414390 | 0.0593525 | 0.0868304    | 0.030976342 |
| 4          | rs10030362 | 0.534173  | 0.485003     | 0.030976342 |
| 1          | rs10736392 | 0.379928  | 0.428912     | 0.030993357 |
| 1          | rs4907889  | 0.281362  | 0.326858     | 0.030993357 |
| 5          | rs6872947  | 0.390681  | 0.343729     | 0.030993357 |
| 8          | rs10504684 | 0.155797  | 0.195089     | 0.030993357 |
| 10         | rs1870097  | 0.143885  | 0.182361     | 0.030993357 |
| 12         | rs11173654 | 0.38172   | 0.335262     | 0.030993357 |
| 21         | rs2834415  | 0.0949821 | 0.127304     | 0.030993357 |
| 15         | rs12441273 | 0.11828   | 0.0896693    | 0.031010382 |
| 20         | rs6417404  | 0.197133  | 0.161141     | 0.031010382 |
| 3          | rs459980   | 0.514337  | 0.465723     | 0.031027416 |
| 3          | rs9867336  | 0.275986  | 0.321976     | 0.031027416 |
| 10         | rs11596167 | 0.129496  | 0.0995228    | 0.031027416 |
| 2          | rs17049328 | 0.191336  | 0.233618     | 0.031044461 |

Table DS2: All SNPs tested for association (RDC SABP vs. controls) with the Cochran-Armitage trend test and significant at the p=0.05 threshold.

| chromosome | SNP        | MAF_cases | MAF_controls | p_value     |
|------------|------------|-----------|--------------|-------------|
| 4          | rs1542458  | 0.148746  | 0.186819     | 0.031044461 |
| 5          | rs32783    | 0.17446   | 0.215429     | 0.031044461 |
| 5          | rs702634   | 0.267025  | 0.311713     | 0.031044461 |
| 7          | rs1510303  | 0.528674  | 0.479053     | 0.031044461 |
| 17         | rs9901155  | 0.168459  | 0.208518     | 0.031044461 |
| 22         | rs405490   | 0.348921  | 0.303134     | 0.031044461 |
| 2          | rs4849710  | 0.18638   | 0.227986     | 0.031061515 |
| 4          | rs6843590  | 0.234767  | 0.278005     | 0.031061515 |
| 11         | rs737502   | 0.137993  | 0.175238     | 0.031061515 |
| 11         | rs2162159  | 0.137993  | 0.175238     | 0.031061515 |
| 2          | rs17456106 | 0.478417  | 0.429546     | 0.031078579 |
| 5          | rs2560593  | 0.374101  | 0.422854     | 0.031078579 |
| 6          | rs7749074  | 0.356631  | 0.405005     | 0.031078579 |
| 13         | rs17081386 | 0.0412186 | 0.0652915    | 0.031078579 |
| 16         | rs6499044  | 0.33871   | 0.294178     | 0.031078579 |
| 5          | rs10076149 | 0.422939  | 0.47208      | 0.031095652 |
| 7          | rs7785899  | 0.299283  | 0.346167     | 0.031095652 |
| 11         | rs1164666  | 0.369565  | 0.417376     | 0.031095652 |
| 12         | rs10773444 | 0.367384  | 0.321416     | 0.031095652 |
| 13         | rs9535083  | 0.539427  | 0.490123     | 0.031095652 |
| 13         | rs2769875  | 0.343525  | 0.391735     | 0.031095652 |
| 17         | rs16952511 | 0.140288  | 0.109364     | 0.031095652 |
| 3          | rs544488   | 0.197133  | 0.238671     | 0.031112736 |
| 5          | rs383830   | 0.179211  | 0.220177     | 0.031112736 |
| 6          | rs672369   | 0.239209  | 0.199557     | 0.031112736 |
| 16         | rs10454068 | 0.464029  | 0.415587     | 0.031112736 |
| 5          | rs1909706  | 0.224014  | 0.267303     | 0.031129829 |
| 7          | rs2188833  | 0.301075  | 0.257844     | 0.031129829 |
| 14         | rs1956170  | 0.136201  | 0.172461     | 0.031129829 |
| 14         | rs12436825 | 0.136201  | 0.172455     | 0.031129829 |
| 15         | rs8031287  | 0.306452  | 0.353542     | 0.031129829 |
| 1          | rs12564579 | 0.37276   | 0.421151     | 0.031146932 |
| 2          | rs17616904 | 0.197133  | 0.239449     | 0.031146932 |
| 11         | rs10765455 | 0.143369  | 0.11204      | 0.031146932 |
| 3          | rs1316415  | 0.367384  | 0.415843     | 0.031164045 |
| 13         | rs7995966  | 0.526882  | 0.477327     | 0.031164045 |
| 4          | rs12505447 | 0.216606  | 0.177827     | 0.031181168 |
| 5          | rs9686531  | 0.0913978 | 0.123381     | 0.031181168 |
| 6          | rs386344   | 0.496403  | 0.448158     | 0.031181168 |
| 8          | rs7011289  | 0.367384  | 0.321295     | 0.031181168 |
| 8          | rs1353450  | 0.446237  | 0.398331     | 0.031181168 |
| 13         | rs9317103  | 0.216846  | 0.259202     | 0.031181168 |
| 1          | rs12143315 | 0.369176  | 0.418173     | 0.0311983   |
| 6          | rs12528203 | 0.194946  | 0.158982     | 0.0311983   |
| 2          | rs4319896  | 0.508993  | 0.459257     | 0.031215442 |
| 2          | rs720453   | 0.478495  | 0.429714     | 0.031215442 |
| 3          | rs17075328 | 0.116487  | 0.151345     | 0.031215442 |
| 6          | rs2313753  | 0.309353  | 0.356656     | 0.031215442 |
| 9          | rs17768235 | 0.483871  | 0.435264     | 0.031215442 |
| 9          | rs10990265 | 0.150538  | 0.188309     | 0.031215442 |
| 11         | rs733224   | 0.161871  | 0.128708     | 0.031215442 |
| 3          | rs9858164  | 0.301075  | 0.257839     | 0.031232594 |

Table DS2: All SNPs tested for association (RDC SABP vs. controls) with the Cochran-Armitage trend test and significant at the p=0.05 threshold.

| chromosome | SNP        | MAF_cases | MAF_controls | p_value     |
|------------|------------|-----------|--------------|-------------|
| 6          | rs12205260 | 0.33935   | 0.386751     | 0.031232594 |
| 13         | rs7336083  | 0.360215  | 0.314928     | 0.031232594 |
| 6          | rs13219726 | 0.277778  | 0.32385      | 0.031249756 |
| 9          | rs10980405 | 0.143369  | 0.180579     | 0.031249756 |
| 8          | rs13272502 | 0.166667  | 0.206433     | 0.031266928 |
| 8          | rs2616511  | 0.274194  | 0.232356     | 0.031266928 |
| 11         | rs998686   | 0.460573  | 0.412517     | 0.031266928 |
| 13         | rs1218307  | 0.343525  | 0.392053     | 0.031266928 |
| 20         | rs6128922  | 0.444444  | 0.396323     | 0.031266928 |
| 1          | rs1538687  | 0.270609  | 0.316274     | 0.03128411  |
| 7          | rs701325   | 0.142086  | 0.179023     | 0.03128411  |
| 1          | rs1409778  | 0.408602  | 0.45707      | 0.031301301 |
| 7          | rs17483922 | 0.143885  | 0.182283     | 0.031301301 |
| 13         | rs1886871  | 0.0985663 | 0.0725971    | 0.031301301 |
| 14         | rs911671   | 0.379928  | 0.333447     | 0.031301301 |
| 4          | rs527313   | 0.243728  | 0.203578     | 0.031318502 |
| 7          | rs6957836  | 0.329137  | 0.377214     | 0.031318502 |
| 9          | rs960935   | 0.286738  | 0.24438      | 0.031318502 |
| 11         | rs4936168  | 0.397849  | 0.351089     | 0.031318502 |
| 13         | rs9509124  | 0.426523  | 0.379087     | 0.031318502 |
| 4          | rs9291545  | 0.291367  | 0.248295     | 0.031335714 |
| 12         | rs10492371 | 0.111111  | 0.083959     | 0.031335714 |
| 17         | rs566569   | 0.107527  | 0.141664     | 0.031335714 |
| 2          | rs6759892  | 0.44964   | 0.400375     | 0.031352935 |
| 4          | rs1346132  | 0.274194  | 0.232459     | 0.031352935 |
| 6          | rs6913666  | 0.526978  | 0.47752      | 0.031352935 |
| 9          | rs10809564 | 0.388889  | 0.341343     | 0.031352935 |
| 10         | rs1649943  | 0.34      | 0.388093     | 0.031352935 |
| 12         | rs4964217  | 0.15233   | 0.11955      | 0.031352935 |
| 21         | rs183106   | 0.206835  | 0.169396     | 0.031352935 |
| 1          | rs4650353  | 0.343525  | 0.29809      | 0.031370166 |
| 2          | rs7563139  | 0.207885  | 0.250681     | 0.031370166 |
| 4          | rs6833142  | 0.259857  | 0.30582      | 0.031370166 |
| 5          | rs1017470  | 0.206835  | 0.249319     | 0.031370166 |
| 18         | rs1907415  | 0.272401  | 0.318337     | 0.031370166 |
| 5          | rs1450949  | 0.189964  | 0.23111      | 0.031387406 |
| 8          | rs9969657  | 0.471326  | 0.422408     | 0.031387406 |
| 10         | rs11202366 | 0.327338  | 0.375128     | 0.031387406 |
| 3          | rs9881034  | 0.543011  | 0.493188     | 0.031404657 |
| 4          | rs11725683 | 0.38172   | 0.430688     | 0.031404657 |
| 1          | rs7354899  | 0.344086  | 0.391082     | 0.031421918 |
| 4          | rs1903222  | 0.270609  | 0.316292     | 0.031421918 |
| 15         | rs8029244  | 0.453237  | 0.501873     | 0.031421918 |
| 21         | rs2205523  | 0.283154  | 0.329077     | 0.031421918 |
| 3          | rs7620213  | 0.46223   | 0.413118     | 0.031439188 |
| 4          | rs11729630 | 0.198925  | 0.240798     | 0.031439188 |
| 4          | rs3849035  | 0.164875  | 0.2046       | 0.031439188 |
| 5          | rs7708893  | 0.318996  | 0.275017     | 0.031439188 |
| 21         | rs2245462  | 0.195341  | 0.159455     | 0.031456468 |
| 8          | rs17078893 | 0.410072  | 0.363357     | 0.031473759 |
| 16         | rs9635515  | 0.283154  | 0.241227     | 0.031473759 |
| 3          | rs8179948  | 0.190647  | 0.155002     | 0.031491059 |

Table DS2: All SNPs tested for association (RDC SABP vs. controls) with the Cochran-Armitage trend test and significant at the p=0.05 threshold.

| chromosome | SNP        | MAF_cases | MAF_controls | p_value     |
|------------|------------|-----------|--------------|-------------|
| 3          | rs4677496  | 0.109319  | 0.0818863    | 0.031491059 |
| 7          | rs1639484  | 0.379928  | 0.427549     | 0.031491059 |
| 11         | rs599197   | 0.354839  | 0.308558     | 0.031491059 |
| 12         | rs3751264  | 0.11828   | 0.089748     | 0.031491059 |
| 17         | rs11078796 | 0.503584  | 0.45484      | 0.031491059 |
| 20         | rs6047258  | 0.412186  | 0.365123     | 0.031491059 |
| 2          | rs11123564 | 0.256272  | 0.21577      | 0.031508369 |
| 11         | rs16913578 | 0.0430108 | 0.0672455    | 0.031508369 |
| 3          | rs12498099 | 0.265343  | 0.223644     | 0.031525689 |
| 15         | rs1108478  | 0.195341  | 0.236466     | 0.031525689 |
| 17         | rs9901757  | 0.478339  | 0.429302     | 0.031525689 |
| 18         | rs1788984  | 0.366906  | 0.320954     | 0.031525689 |
| 20         | rs6117432  | 0.191756  | 0.232606     | 0.031525689 |
| 11         | rs10892287 | 0.240143  | 0.200647     | 0.031543019 |
| 17         | rs8073793  | 0.156475  | 0.195563     | 0.031543019 |
| 4          | rs11942115 | 0.146953  | 0.115162     | 0.031560359 |
| 6          | rs6921729  | 0.433692  | 0.385349     | 0.031560359 |
| 12         | rs11613924 | 0.15233   | 0.120014     | 0.031560359 |
| 17         | rs1552013  | 0.0806452 | 0.110619     | 0.031560359 |
| 14         | rs17824591 | 0.239209  | 0.199625     | 0.031577709 |
| 1          | rs11210251 | 0.451613  | 0.501192     | 0.031595068 |
| 4          | rs7698838  | 0.11828   | 0.0899011    | 0.031595068 |
| 11         | rs1079338  | 0.216846  | 0.178523     | 0.031595068 |
| 19         | rs7257553  | 0.28777   | 0.245396     | 0.031595068 |
| 20         | rs6086797  | 0.238351  | 0.198569     | 0.031595068 |
| 1          | rs6685370  | 0.0467626 | 0.0716474    | 0.031612438 |
| 7          | rs10255964 | 0.349462  | 0.3046       | 0.031612438 |
| 7          | rs1450870  | 0.342294  | 0.390177     | 0.031612438 |
| 7          | rs215705   | 0.112903  | 0.147549     | 0.031612438 |
| 13         | rs4769010  | 0.275986  | 0.320954     | 0.031612438 |
| 19         | rs11882104 | 0.0394265 | 0.062649     | 0.031612438 |
| 5          | rs6889984  | 0.0698925 | 0.0989441    | 0.031629818 |
| 21         | rs162378   | 0.385305  | 0.338567     | 0.031629818 |
| 2          | rs6751123  | 0.0770609 | 0.0546262    | 0.031647208 |
| 10         | rs10829446 | 0.170251  | 0.136534     | 0.031647208 |
| 11         | rs3924915  | 0.265233  | 0.310627     | 0.031647208 |
| 14         | rs10483944 | 0.142086  | 0.179522     | 0.031647208 |
| 1          | rs17160256 | 0.142086  | 0.110542     | 0.031664607 |
| 5          | rs6596595  | 0.154676  | 0.19295      | 0.031664607 |
| 10         | rs17381591 | 0.360215  | 0.314632     | 0.031664607 |
| 12         | rs7313041  | 0.204301  | 0.167291     | 0.031664607 |
| 17         | rs16946601 | 0.130824  | 0.167405     | 0.031664607 |
| 21         | rs2823149  | 0.419355  | 0.468984     | 0.031664607 |
| 5          | rs10515889 | 0.182796  | 0.147712     | 0.031682017 |
| 8          | rs1008055  | 0.47482   | 0.42616      | 0.031682017 |
| 10         | rs2660109  | 0.530466  | 0.481103     | 0.031682017 |
| 19         | rs2571043  | 0.401434  | 0.450136     | 0.031682017 |
| 2          | rs11898344 | 0.193548  | 0.157357     | 0.031699437 |
| 9          | rs3904475  | 0.249104  | 0.208546     | 0.031699437 |
| 11         | rs2054733  | 0.464158  | 0.415928     | 0.031699437 |
| 15         | rs7402237  | 0.349462  | 0.397204     | 0.031699437 |
| 17         | rs1394389  | 0.222222  | 0.184435     | 0.031699437 |

Table DS2: All SNPs tested for association (RDC SABP vs. controls) with the Cochran-Armitage trend test and significant at the p=0.05 threshold.

| chromosome | SNP           | MAF_cases | MAF_controls | p_value     |
|------------|---------------|-----------|--------------|-------------|
| 5          | rs16887914    | 0.100358  | 0.0744463    | 0.031716866 |
| 5          | rs4703099     | 0.242806  | 0.287368     | 0.031716866 |
| 5          | rs574071      | 0.197133  | 0.239331     | 0.031716866 |
| 13         | rs7334739     | 0.21147   | 0.254257     | 0.031716866 |
| 6          | rs7382464     | 0.31362   | 0.270542     | 0.031734306 |
| 7          | rs12701864    | 0.367384  | 0.415217     | 0.031734306 |
| 9          | rs586554      | 0.351254  | 0.399047     | 0.031734306 |
| 12         | rs11174557    | 0.229391  | 0.190565     | 0.031734306 |
| 20         | rs2762932     | 0.165468  | 0.132253     | 0.031734306 |
| 3          | rs13072957    | 0.349462  | 0.304192     | 0.031751755 |
| 5          | rs6451633     | 0.197842  | 0.161996     | 0.031751755 |
| 6          | rs6935311     | 0.383513  | 0.337645     | 0.031751755 |
| 8          | rs1040098     | 0.521505  | 0.47208      | 0.031751755 |
| 13         | rs4771482     | 0.304659  | 0.351107     | 0.031751755 |
| 15         | rs12595154    | 0.492832  | 0.443933     | 0.031751755 |
| 2          | rs12621192    | 0.356631  | 0.310944     | 0.031769215 |
| 3          | rs1406568     | 0.451439  | 0.403066     | 0.031769215 |
| 5          | rs456775      | 0.501805  | 0.453461     | 0.031769215 |
| 5          | rs13436709    | 0.204301  | 0.246253     | 0.031769215 |
| 7          | rs819457      | 0.428315  | 0.477327     | 0.031769215 |
| 7          | SNP_A-1846070 | 0.205036  | 0.167688     | 0.031769215 |
| 1          | rs17414281    | 0.265233  | 0.224285     | 0.031786685 |
| 2          | rs7578017     | 0.154122  | 0.121553     | 0.031786685 |
| 8          | rs7009367     | 0.241935  | 0.202113     | 0.031786685 |
| 11         | rs502834      | 0.390288  | 0.439461     | 0.031786685 |
| 13         | rs9534842     | 0.0985663 | 0.0728669    | 0.031786685 |
| 19         | rs2546127     | 0.212996  | 0.175409     | 0.031786685 |
| 2          | rs6718785     | 0.0971223 | 0.130286     | 0.031804164 |
| 3          | rs12493973    | 0.462094  | 0.41357      | 0.031804164 |
| 7          | rs2001599     | 0.439068  | 0.487743     | 0.031804164 |
| 8          | rs897735      | 0.537634  | 0.488582     | 0.031804164 |
| 2          | rs17679370    | 0.535971  | 0.487214     | 0.031821654 |
| 8          | rs17054120    | 0.147482  | 0.185773     | 0.031821654 |
| 12         | rs607567      | 0.310036  | 0.356631     | 0.031821654 |
| 13         | rs11069890    | 0.311151  | 0.266599     | 0.031821654 |
| 2          | rs446947      | 0.308244  | 0.264656     | 0.031839154 |
| 2          | rs1914029     | 0.145161  | 0.113288     | 0.031839154 |
| 5          | rs7700866     | 0.136201  | 0.172343     | 0.031839154 |
| 6          | rs275344      | 0.303249  | 0.260061     | 0.031839154 |
| 8          | rs16894111    | 0.159498  | 0.126319     | 0.031839154 |
| 12         | rs470506      | 0.424731  | 0.377387     | 0.031839154 |
| 14         | rs2681767     | 0.369176  | 0.417575     | 0.031839154 |
| 5          | rs26071       | 0.134409  | 0.10433      | 0.031856664 |
| 11         | rs14983       | 0.265233  | 0.223944     | 0.031856664 |
| 16         | rs2965798     | 0.363799  | 0.318801     | 0.031856664 |
| 20         | rs6048289     | 0.462366  | 0.414422     | 0.031856664 |
| 1          | rs2744749     | 0.347122  | 0.395095     | 0.031874183 |
| 7          | rs12539207    | 0.0649819 | 0.0935264    | 0.031874183 |
| 1          | rs6657926     | 0.0539568 | 0.080348     | 0.031891713 |
| 1          | SNP_A-4201031 | 0.206835  | 0.1703       | 0.031891713 |
| 4          | rs3756098     | 0.388889  | 0.342482     | 0.031891713 |
| 5          | rs152490      | 0.113309  | 0.14789      | 0.031891713 |

Table DS2: All SNPs tested for association (RDC SABP vs. controls) with the Cochran-Armitage trend test and significant at the p=0.05 threshold.

| chromosome | SNP        | MAF_cases | MAF_controls | p_value     |
|------------|------------|-----------|--------------|-------------|
| 7          | rs4732082  | 0.444444  | 0.493363     | 0.031891713 |
| 8          | rs1521154  | 0.197842  | 0.239441     | 0.031891713 |
| 14         | rs17129526 | 0.136201  | 0.17229      | 0.031891713 |
| 17         | rs16554    | 0.118705  | 0.15361      | 0.031891713 |
| 22         | rs7292562  | 0.109319  | 0.0821404    | 0.031891713 |
| 1          | rs652234   | 0.320789  | 0.276473     | 0.031909253 |
| 13         | rs4772392  | 0.435252  | 0.484626     | 0.031909253 |
| 20         | rs4815042  | 0.327338  | 0.283038     | 0.031909253 |
| 4          | rs4479686  | 0.365591  | 0.413911     | 0.031926803 |
| 6          | rs2883881  | 0.107527  | 0.0804911    | 0.031926803 |
| 6          | rs7452300  | 0.426523  | 0.379428     | 0.031926803 |
| 2          | rs12617520 | 0.136201  | 0.172913     | 0.031961934 |
| 12         | rs474817   | 0.523466  | 0.474617     | 0.031961934 |
| 2          | rs6757022  | 0.308244  | 0.264485     | 0.031979514 |
| 4          | rs10021833 | 0.374552  | 0.327768     | 0.031979514 |
| 5          | rs818740   | 0.473118  | 0.425068     | 0.031979514 |
| 6          | rs541178   | 0.0863309 | 0.0624573    | 0.031979514 |
| 7          | rs2078118  | 0.100358  | 0.074276     | 0.031979514 |
| 8          | rs2609603  | 0.22043   | 0.182066     | 0.031979514 |
| 14         | rs2772518  | 0.291367  | 0.249319     | 0.031979514 |
| 1          | rs1392132  | 0.415771  | 0.368269     | 0.031997104 |
| 1          | rs3856200  | 0.401434  | 0.450306     | 0.031997104 |
| 8          | rs2168331  | 0.206093  | 0.169163     | 0.031997104 |
| 13         | rs17079258 | 0.150538  | 0.188821     | 0.031997104 |
| 13         | rs1324038  | 0.453237  | 0.405654     | 0.031997104 |
| 15         | rs936929   | 0.31295   | 0.268825     | 0.031997104 |
| 3          | rs9881520  | 0.510753  | 0.461355     | 0.032014705 |
| 5          | rs449650   | 0.179211  | 0.219952     | 0.032014705 |
| 5          | rs1501802  | 0.365591  | 0.413488     | 0.032014705 |
| 14         | rs1756053  | 0.383513  | 0.431926     | 0.032014705 |
| 18         | rs4800513  | 0.124101  | 0.0948158    | 0.032014705 |
| 2          | rs7574442  | 0.265233  | 0.224403     | 0.032032315 |
| 7          | rs12707449 | 0.336331  | 0.384576     | 0.032032315 |
| 10         | rs1870098  | 0.143369  | 0.181523     | 0.032032315 |
| 10         | rs4918538  | 0.215054  | 0.25801      | 0.032032315 |
| 11         | rs2595467  | 0.439068  | 0.48842      | 0.032032315 |
| 18         | rs9950114  | 0.21147   | 0.254434     | 0.032032315 |
| 7          | rs11971677 | 0.44964   | 0.498806     | 0.032049936 |
| 16         | rs7498340  | 0.26259   | 0.222203     | 0.032049936 |
| 1          | rs10913334 | 0.0878136 | 0.11951      | 0.032067567 |
| 4          | rs11940746 | 0.173835  | 0.21414      | 0.032067567 |
| 8          | rs2128127  | 0.467742  | 0.41985      | 0.032067567 |
| 10         | rs10905876 | 0.215054  | 0.177502     | 0.032067567 |
| 15         | rs4887019  | 0.478495  | 0.430031     | 0.032067567 |
| 8          | rs4871401  | 0.405018  | 0.454019     | 0.032085207 |
| 12         | rs12227270 | 0.34767   | 0.302452     | 0.032085207 |
| 13         | rs523671   | 0.193548  | 0.157751     | 0.032085207 |
| 14         | rs2079504  | 0.369176  | 0.417519     | 0.032085207 |
| 15         | rs10519060 | 0.307554  | 0.354536     | 0.032085207 |
| 16         | rs9924993  | 0.166667  | 0.205862     | 0.032085207 |
| 17         | rs2365494  | 0.0395683 | 0.062713     | 0.032085207 |
| 2          | rs12691693 | 0.418773  | 0.371594     | 0.032102859 |

Table DS2: All SNPs tested for association (RDC SABP vs. controls) with the Cochran-Armitage trend test and significant at the p=0.05 threshold.

| chromosome | SNP           | MAF_cases | MAF_controls | p_value     |
|------------|---------------|-----------|--------------|-------------|
| 7          | rs2052604     | 0.413357  | 0.366178     | 0.032102859 |
| 8          | rs4734553     | 0.363309  | 0.411805     | 0.032102859 |
| 16         | rs893174      | 0.462094  | 0.413687     | 0.032102859 |
| 20         | rs226186      | 0.363309  | 0.31694      | 0.032102859 |
| 4          | rs10517989    | 0.159498  | 0.126705     | 0.03212052  |
| 10         | rs2664280     | 0.40681   | 0.455366     | 0.03212052  |
| 13         | rs1854521     | 0.448029  | 0.497107     | 0.03212052  |
| 15         | rs11070591    | 0.245487  | 0.290603     | 0.032138191 |
| 10         | rs11016744    | 0.398551  | 0.351536     | 0.032155872 |
| 13         | rs16971537    | 0.258065  | 0.217036     | 0.032155872 |
| 15         | rs1706826     | 0.401434  | 0.450085     | 0.032155872 |
| 17         | rs871289      | 0.413669  | 0.462142     | 0.032155872 |
| 22         | rs132875      | 0.175627  | 0.141152     | 0.032155872 |
| 2          | rs4246623     | 0.374101  | 0.421806     | 0.032173564 |
| 3          | rs9870357     | 0.390681  | 0.344251     | 0.032173564 |
| 5          | rs865410      | 0.151079  | 0.189567     | 0.032173564 |
| 6          | rs4708347     | 0.219424  | 0.261662     | 0.032173564 |
| 14         | rs17124909    | 0.428315  | 0.381131     | 0.032173564 |
| 2          | rs6430833     | 0.399642  | 0.449233     | 0.032191266 |
| 3          | rs2131108     | 0.144404  | 0.182237     | 0.032191266 |
| 20         | rs6070143     | 0.532258  | 0.483992     | 0.032191266 |
| 1          | rs6704373     | 0.23741   | 0.28109      | 0.032208978 |
| 6          | rs3129249     | 0.188172  | 0.228854     | 0.032208978 |
| 9          | rs11138012    | 0.508993  | 0.46015      | 0.032208978 |
| 2          | rs445411      | 0.315412  | 0.362134     | 0.0322267   |
| 4          | rs1601854     | 0.175627  | 0.216308     | 0.0322267   |
| 11         | rs4627075     | 0.155914  | 0.194586     | 0.0322267   |
| 2          | rs10200618    | 0.284946  | 0.242672     | 0.032244432 |
| 4          | rs2390686     | 0.0448029 | 0.0692884    | 0.032244432 |
| 10         | rs7917005     | 0.310036  | 0.356851     | 0.032244432 |
| 12         | rs4931037     | 0.218638  | 0.261085     | 0.032244432 |
| 14         | rs12883055    | 0.317204  | 0.364491     | 0.032244432 |
| 16         | rs16977003    | 0.141577  | 0.178535     | 0.032244432 |
| 2          | rs12621308    | 0.336918  | 0.384117     | 0.032262174 |
| 5          | rs1366286     | 0.410394  | 0.458461     | 0.032262174 |
| 6          | rs2496301     | 0.166667  | 0.205622     | 0.032262174 |
| 8          | SNP_A-2182544 | 0.387097  | 0.435967     | 0.032262174 |
| 11         | rs1027388     | 0.535971  | 0.487381     | 0.032262174 |
| 12         | rs4964675     | 0.222222  | 0.266008     | 0.032262174 |
| 17         | rs1805456     | 0.09319   | 0.125936     | 0.032262174 |
| 6          | rs6916312     | 0.263441  | 0.222733     | 0.032279927 |
| 10         | rs4253038     | 0.392473  | 0.440395     | 0.032279927 |
| 11         | rs7942167     | 0.417266  | 0.369802     | 0.032279927 |
| 16         | rs2965827     | 0.421147  | 0.470187     | 0.032279927 |
| 5          | rs2398648     | 0.118705  | 0.152991     | 0.03229769  |
| 5          | rs34122       | 0.350719  | 0.305451     | 0.03229769  |
| 6          | rs9345907     | 0.356631  | 0.4046       | 0.03229769  |
| 12         | rs812796      | 0.148014  | 0.186158     | 0.03229769  |
| 14         | rs8017210     | 0.227437  | 0.189185     | 0.03229769  |
| 1          | rs4987299     | 0.0776173 | 0.10791      | 0.032315463 |
| 13         | rs6490819     | 0.145683  | 0.18343      | 0.032315463 |
| 18         | rs10871585    | 0.413978  | 0.36661      | 0.032315463 |

Table DS2: All SNPs tested for association (RDC SABP vs. controls) with the Cochran-Armitage trend test and significant at the p=0.05 threshold.

| chromosome | SNP           | MAF_cases | MAF_controls | p_value     |
|------------|---------------|-----------|--------------|-------------|
| 3          | rs6772601     | 0.460573  | 0.411785     | 0.032333246 |
| 3          | rs12496159    | 0.370504  | 0.418569     | 0.032333246 |
| 5          | rs461702      | 0.501792  | 0.45371      | 0.032333246 |
| 5          | rs2964350     | 0.480287  | 0.43171      | 0.032333246 |
| 16         | rs1641025     | 0.215054  | 0.257576     | 0.032333246 |
| 19         | rs2681366     | 0.242806  | 0.203205     | 0.032333246 |
| 4          | rs1400353     | 0.329749  | 0.377002     | 0.03235104  |
| 5          | SNP_A-2256277 | 0.127698  | 0.0987044    | 0.03235104  |
| 8          | rs4418381     | 0.216846  | 0.259537     | 0.03235104  |
| 9          | rs3904024     | 0.0395683 | 0.062968     | 0.03235104  |
| 9          | rs7846815     | 0.291367  | 0.337594     | 0.03235104  |
| 13         | rs1334193     | 0.224014  | 0.185967     | 0.03235104  |
| 15         | rs16973054    | 0.0989209 | 0.0729131    | 0.03235104  |
| 1          | rs9426209     | 0.512545  | 0.463921     | 0.032368843 |
| 10         | rs730357      | 0.24552   | 0.289222     | 0.032368843 |
| 12         | rs7980125     | 0.27957   | 0.325716     | 0.032368843 |
| 21         | rs11088379    | 0.304659  | 0.350614     | 0.032368843 |
| 7          | rs11772829    | 0.250896  | 0.295811     | 0.032386657 |
| 8          | rs7828391     | 0.351254  | 0.306474     | 0.032386657 |
| 13         | rs2154071     | 0.143885  | 0.11259      | 0.032386657 |
| 16         | rs7193741     | 0.366426  | 0.415385     | 0.032386657 |
| 2          | rs1470962     | 0.370909  | 0.419305     | 0.032404482 |
| 6          | rs6902741     | 0.327338  | 0.374617     | 0.032404482 |
| 12         | rs2288270     | 0.422939  | 0.375681     | 0.032404482 |
| 1          | rs2486424     | 0.401079  | 0.449744     | 0.032422316 |
| 8          | rs767317      | 0.267986  | 0.312628     | 0.032422316 |
| 9          | rs7872330     | 0.181004  | 0.220784     | 0.032422316 |
| 11         | rs4265560     | 0.492806  | 0.444444     | 0.032422316 |
| 3          | rs6787877     | 0.351254  | 0.305935     | 0.032440161 |
| 8          | rs4872372     | 0.388489  | 0.437543     | 0.032440161 |
| 13         | rs638323      | 0.0483871 | 0.0735444    | 0.032440161 |
| 3          | rs6771057     | 0.42446   | 0.472922     | 0.032458015 |
| 12         | rs2565666     | 0.0842294 | 0.11486      | 0.032458015 |
| 17         | rs203092      | 0.22482   | 0.268654     | 0.032458015 |
| 20         | rs6065515     | 0.541219  | 0.492497     | 0.032458015 |
| 22         | rs1028283     | 0.155914  | 0.123255     | 0.032458015 |
| 6          | rs802660      | 0.182796  | 0.148041     | 0.032475881 |
| 9          | rs842304      | 0.383094  | 0.336683     | 0.032475881 |
| 14         | rs1982963     | 0.275986  | 0.234151     | 0.032475881 |
| 16         | rs17199690    | 0.11828   | 0.152929     | 0.032475881 |
| 21         | rs634522      | 0.148746  | 0.116923     | 0.032475881 |
| 7          | rs7792231     | 0.130824  | 0.101158     | 0.032493756 |
| 7          | rs842447      | 0.139785  | 0.108747     | 0.032493756 |
| 8          | rs7831538     | 0.310469  | 0.26644      | 0.032493756 |
| 9          | rs7863227     | 0.208633  | 0.171492     | 0.032493756 |
| 13         | rs7981254     | 0.503597  | 0.454514     | 0.032493756 |
| 3          | rs6769288     | 0.265233  | 0.310627     | 0.032511642 |
| 3          | rs3846211     | 0.351986  | 0.306446     | 0.032511642 |
| 12         | rs10492157    | 0.195341  | 0.236376     | 0.032511642 |
| 1          | rs3124456     | 0.0842294 | 0.0606267    | 0.032529538 |
| 4          | rs12647211    | 0.234767  | 0.196038     | 0.032529538 |
| 8          | rs1027264     | 0.18638   | 0.151175     | 0.032529538 |



Table DS2: All SNPs tested for association (RDC SABP vs. controls) with the Cochran-Armitage trend test and significant at the p=0.05 threshold.

| chromosome | SNP           | MAF_cases | MAF_controls | p_value     |
|------------|---------------|-----------|--------------|-------------|
| 10         | rs10904905    | 0.189964  | 0.154462     | 0.032529538 |
| 18         | rs2346058     | 0.541219  | 0.492845     | 0.032529538 |
| 1          | rs11207909    | 0.196751  | 0.160458     | 0.032547444 |
| 2          | rs1880039     | 0.0824373 | 0.112777     | 0.032547444 |
| 4          | rs7440912     | 0.258065  | 0.217495     | 0.032547444 |
| 4          | rs1922232     | 0.275986  | 0.321295     | 0.032547444 |
| 6          | rs802661      | 0.182796  | 0.148091     | 0.032547444 |
| 7          | rs6975610     | 0.401434  | 0.44954      | 0.032547444 |
| 16         | rs7405353     | 0.336918  | 0.384379     | 0.032547444 |
| 5          | rs11745874    | 0.482079  | 0.434085     | 0.03256536  |
| 7          | rs36876       | 0.225806  | 0.187564     | 0.03256536  |
| 9          | rs7862181     | 0.394265  | 0.347085     | 0.03256536  |
| 20         | rs6017878     | 0.133094  | 0.103378     | 0.03256536  |
| 2          | rs1207418     | 0.102151  | 0.135605     | 0.032583287 |
| 13         | rs7334221     | 0.51259   | 0.463739     | 0.032583287 |
| 14         | rs4476094     | 0.447842  | 0.496421     | 0.032583287 |
| 18         | rs678870      | 0.383094  | 0.431834     | 0.032583287 |
| 1          | rs4656013     | 0.460573  | 0.412807     | 0.032601224 |
| 1          | rs10924239    | 0.113718  | 0.148294     | 0.032601224 |
| 3          | rs4683981     | 0.296763  | 0.25393      | 0.032601224 |
| 3          | rs17785714    | 0.0809353 | 0.111546     | 0.032601224 |
| 5          | rs6451634     | 0.198925  | 0.163025     | 0.032601224 |
| 8          | rs4327859     | 0.183453  | 0.14799      | 0.032601224 |
| 1          | rs17535067    | 0.133574  | 0.103237     | 0.032619172 |
| 3          | rs17570449    | 0.464158  | 0.416184     | 0.032619172 |
| 3          | rs7646723     | 0.120072  | 0.0916239    | 0.032619172 |
| 3          | rs10433430    | 0.485663  | 0.436605     | 0.032619172 |
| 9          | rs7032733     | 0.28853   | 0.245997     | 0.032619172 |
| 12         | rs6581196     | 0.485663  | 0.436562     | 0.032619172 |
| 17         | rs7210988     | 0.103943  | 0.0778005    | 0.032619172 |
| 18         | rs609744      | 0.517986  | 0.469186     | 0.032619172 |
| 21         | SNP_A-2018573 | 0.120504  | 0.155537     | 0.032619172 |
| 1          | rs10798508    | 0.31769   | 0.365155     | 0.03263713  |
| 2          | rs1820295     | 0.201439  | 0.242925     | 0.03263713  |
| 2          | rs10933253    | 0.205455  | 0.167973     | 0.03263713  |
| 7          | rs2194752     | 0.353047  | 0.400409     | 0.03263713  |
| 15         | rs8034650     | 0.0394265 | 0.0624147    | 0.03263713  |
| 2          | rs7563561     | 0.449821  | 0.401056     | 0.032655098 |
| 2          | rs934396      | 0.18638   | 0.226869     | 0.032655098 |
| 6          | rs2268721     | 0.243728  | 0.287905     | 0.032655098 |
| 10         | rs11193697    | 0.394265  | 0.348211     | 0.032655098 |
| 11         | rs900517      | 0.100358  | 0.132709     | 0.032655098 |
| 12         | rs11171569    | 0.26259   | 0.221806     | 0.032655098 |
| 20         | rs6083296     | 0.305755  | 0.35273      | 0.032655098 |
| 4          | rs1401535     | 0.258065  | 0.217665     | 0.032673076 |
| 5          | rs17507502    | 0.100358  | 0.132754     | 0.032673076 |
| 12         | rs9739764     | 0.261649  | 0.30654      | 0.032673076 |
| 12         | rs7972272     | 0.354839  | 0.309751     | 0.032673076 |
| 17         | rs7223475     | 0.164875  | 0.131534     | 0.032673076 |
| 22         | rs16988632    | 0.21147   | 0.173935     | 0.032673076 |
| 2          | rs4316910     | 0.318996  | 0.275128     | 0.032691065 |
| 6          | rs7773507     | 0.356631  | 0.404462     | 0.032691065 |

Table DS2: All SNPs tested for association (RDC SABP vs. controls) with the Cochran-Armitage trend test and significant at the p=0.05 threshold.

| chromosome | SNP           | MAF_cases | MAF_controls | p_value     |
|------------|---------------|-----------|--------------|-------------|
| 9          | rs11788572    | 0.367384  | 0.321173     | 0.032691065 |
| 16         | rs7500549     | 0.514337  | 0.46476      | 0.032691065 |
| 18         | rs1942965     | 0.534173  | 0.485695     | 0.032691065 |
| 22         | rs2542334     | 0.378136  | 0.33197      | 0.032691065 |
| 22         | rs132881      | 0.175627  | 0.141249     | 0.032691065 |
| 5          | rs12657875    | 0.27957   | 0.324762     | 0.032709064 |
| 6          | rs9365242     | 0.200717  | 0.164227     | 0.032709064 |
| 6          | rs6907666     | 0.451439  | 0.404023     | 0.032709064 |
| 15         | rs7496895     | 0.503584  | 0.454855     | 0.032709064 |
| 1          | rs4245703     | 0.360215  | 0.407989     | 0.032727073 |
| 3          | rs4928091     | 0.462366  | 0.414991     | 0.032727073 |
| 3          | SNP_A-2060674 | 0.256272  | 0.216525     | 0.032727073 |
| 4          | rs2063419     | 0.516187  | 0.467325     | 0.032727073 |
| 7          | rs11531636    | 0.365591  | 0.412777     | 0.032727073 |
| 4          | rs16869739    | 0.132246  | 0.102218     | 0.032745093 |
| 5          | rs7707060     | 0.343525  | 0.298978     | 0.032745093 |
| 7          | rs7803197     | 0.136201  | 0.105622     | 0.032745093 |
| 11         | rs959367      | 0.438849  | 0.488071     | 0.032745093 |
| 11         | rs10839656    | 0.22043   | 0.18219      | 0.032745093 |
| 1          | rs12080191    | 0.0752688 | 0.104913     | 0.032763123 |
| 2          | rs11680053    | 0.442029  | 0.490611     | 0.032763123 |
| 3          | rs6438092     | 0.383094  | 0.337031     | 0.032763123 |
| 4          | rs4388149     | 0.231183  | 0.19257      | 0.032763123 |
| 5          | rs2168996     | 0.492832  | 0.444539     | 0.032763123 |
| 6          | rs6910503     | 0.158845  | 0.19727      | 0.032763123 |
| 6          | rs9365111     | 0.123656  | 0.159339     | 0.032763123 |
| 7          | rs4725889     | 0.508961  | 0.461172     | 0.032763123 |
| 3          | rs2317703     | 0.370968  | 0.418822     | 0.032781164 |
| 5          | rs7705319     | 0.198925  | 0.162628     | 0.032781164 |
| 13         | rs1445204     | 0.267025  | 0.31135      | 0.032781164 |
| 14         | rs1958333     | 0.442238  | 0.394001     | 0.032781164 |
| 19         | rs7252561     | 0.302867  | 0.348925     | 0.032781164 |
| 1          | rs1890295     | 0.107527  | 0.141445     | 0.032799215 |
| 7          | rs16872208    | 0.062724  | 0.0899489    | 0.032799215 |
| 11         | rs11228506    | 0.482014  | 0.433721     | 0.032799215 |
| 16         | rs10500519    | 0.532258  | 0.482629     | 0.032799215 |
| 18         | rs2580135     | 0.467742  | 0.419959     | 0.032799215 |
| 6          | rs2747682     | 0.215054  | 0.257328     | 0.032817276 |
| 10         | rs11199073    | 0.0377698 | 0.0606216    | 0.032817276 |
| 14         | rs1951055     | 0.48741   | 0.439249     | 0.032817276 |
| 1          | rs1572999     | 0.0830325 | 0.0592845    | 0.032835348 |
| 8          | rs10958656    | 0.210432  | 0.252384     | 0.032835348 |
| 13         | rs9519365     | 0.227599  | 0.189438     | 0.032835348 |
| 1          | rs2278652     | 0.09319   | 0.124787     | 0.03285343  |
| 6          | rs7760466     | 0.0913978 | 0.123043     | 0.03285343  |
| 6          | rs330839      | 0.240143  | 0.200715     | 0.03285343  |
| 7          | rs12154282    | 0.333333  | 0.380579     | 0.03285343  |
| 18         | rs1786768     | 0.0394265 | 0.0626066    | 0.03285343  |
| 20         | rs17227126    | 0.102518  | 0.0759645    | 0.03285343  |
| 2          | rs7586098     | 0.485663  | 0.438118     | 0.032871522 |
| 3          | rs9819178     | 0.205036  | 0.24608      | 0.032871522 |
| 5          | rs1115080     | 0.386282  | 0.339462     | 0.032871522 |

Table DS2: All SNPs tested for association (RDC SABP vs. controls) with the Cochran-Armitage trend test and significant at the p=0.05 threshold.

| chromosome | SNP        | MAF_cases | MAF_controls | p_value     |
|------------|------------|-----------|--------------|-------------|
| 11         | rs10833951 | 0.260791  | 0.305792     | 0.032871522 |
| 2          | rs4410298  | 0.197842  | 0.239175     | 0.032889625 |
| 4          | rs12644009 | 0.428058  | 0.38045      | 0.032889625 |
| 10         | rs4935555  | 0.129496  | 0.0995907    | 0.032889625 |
| 11         | rs702739   | 0.134409  | 0.170412     | 0.032889625 |
| 11         | rs743632   | 0.134409  | 0.170412     | 0.032889625 |
| 14         | rs7158068  | 0.359712  | 0.407187     | 0.032889625 |
| 20         | rs398523   | 0.190647  | 0.231516     | 0.032889625 |
| 1          | rs12122931 | 0.339928  | 0.294348     | 0.032907738 |
| 2          | rs6754391  | 0.453405  | 0.405622     | 0.032907738 |
| 3          | rs9822356  | 0.370968  | 0.418795     | 0.032907738 |
| 4          | rs13148787 | 0.307554  | 0.353592     | 0.032907738 |
| 11         | rs2509345  | 0.386691  | 0.434605     | 0.032907738 |
| 21         | rs2150425  | 0.422662  | 0.375639     | 0.032907738 |
| 2          | rs4670659  | 0.283154  | 0.240463     | 0.032925862 |
| 4          | rs1392761  | 0.231183  | 0.192609     | 0.032925862 |
| 9          | rs10962417 | 0.292115  | 0.337985     | 0.032925862 |
| 10         | rs10508512 | 0.107527  | 0.0810351    | 0.032925862 |
| 16         | rs11150205 | 0.284946  | 0.243018     | 0.032925862 |
| 17         | rs4795653  | 0.236559  | 0.197445     | 0.032925862 |
| 18         | rs12962859 | 0.194245  | 0.234792     | 0.032925862 |
| 3          | rs10804509 | 0.397849  | 0.351397     | 0.032943996 |
| 5          | rs10035334 | 0.269928  | 0.228172     | 0.032943996 |
| 7          | rs318571   | 0.379928  | 0.334016     | 0.032943996 |
| 7          | rs1849661  | 0.168459  | 0.207808     | 0.032943996 |
| 13         | rs3827694  | 0.345878  | 0.300817     | 0.032943996 |
| 2          | rs6723140  | 0.139785  | 0.1764       | 0.032962141 |
| 2          | rs7608175  | 0.449821  | 0.401125     | 0.032962141 |
| 7          | rs9656686  | 0.109319  | 0.143369     | 0.032962141 |
| 10         | rs2181522  | 0.327957  | 0.375213     | 0.032962141 |
| 2          | rs1580359  | 0.292115  | 0.249574     | 0.032980296 |
| 5          | rs835066   | 0.116906  | 0.151567     | 0.032980296 |
| 6          | rs9479453  | 0.0752688 | 0.104707     | 0.032980296 |
| 11         | rs6483831  | 0.155914  | 0.194378     | 0.032980296 |
| 11         | rs2298776  | 0.0304659 | 0.0511247    | 0.032980296 |
| 13         | rs17620230 | 0.0956679 | 0.128157     | 0.032980296 |
| 15         | rs1655213  | 0.537634  | 0.489449     | 0.032980296 |
| 1          | rs10492998 | 0.195341  | 0.236348     | 0.032998461 |
| 2          | rs10196226 | 0.0842294 | 0.11507      | 0.032998461 |
| 17         | rs12603993 | 0.384892  | 0.432709     | 0.032998461 |
| 2          | rs2304556  | 0.26259   | 0.307836     | 0.033016637 |
| 6          | rs9351604  | 0.356631  | 0.404364     | 0.033016637 |
| 14         | rs1950649  | 0.136201  | 0.172003     | 0.033016637 |
| 15         | rs17684603 | 0.120504  | 0.0925103    | 0.033016637 |
| 1          | rs12060187 | 0.541516  | 0.49285      | 0.033034823 |
| 3          | rs1920190  | 0.387097  | 0.341002     | 0.033034823 |
| 12         | rs12321565 | 0.107527  | 0.140982     | 0.033034823 |
| 18         | rs7226966  | 0.269784  | 0.315314     | 0.033034823 |
| 8          | rs1425894  | 0.360215  | 0.314973     | 0.03305302  |
| 16         | rs11149776 | 0.293907  | 0.251278     | 0.03305302  |
| 1          | rs12091215 | 0.0845324 | 0.0610297    | 0.033071227 |
| 8          | rs6982653  | 0.358423  | 0.313842     | 0.033071227 |

Table DS2: All SNPs tested for association (RDC SABP vs. controls) with the Cochran-Armitage trend test and significant at the p=0.05 threshold.

| chromosome | SNP        | MAF_cases | MAF_controls | p_value     |
|------------|------------|-----------|--------------|-------------|
| 13         | rs9598504  | 0.334532  | 0.381852     | 0.033071227 |
| 16         | rs1362441  | 0.494624  | 0.446678     | 0.033071227 |
| 7          | rs10281424 | 0.149281  | 0.117918     | 0.033089445 |
| 8          | rs7005198  | 0.155914  | 0.194037     | 0.033089445 |
| 11         | rs2078158  | 0.388889  | 0.34294      | 0.033089445 |
| 18         | rs2032712  | 0.102518  | 0.135434     | 0.033089445 |
| 1          | rs12410629 | 0.247312  | 0.291368     | 0.033107673 |
| 3          | rs9877101  | 0.234767  | 0.196185     | 0.033125912 |
| 7          | rs11761080 | 0.301075  | 0.346967     | 0.033125912 |
| 8          | rs1631550  | 0.363309  | 0.410702     | 0.033125912 |
| 13         | rs1926012  | 0.433692  | 0.386123     | 0.033125912 |
| 14         | rs12587308 | 0.453237  | 0.405451     | 0.033125912 |
| 5          | rs42400    | 0.384477  | 0.338386     | 0.033144161 |
| 5          | rs334890   | 0.136691  | 0.105947     | 0.033144161 |
| 6          | rs9268645  | 0.326165  | 0.373165     | 0.033144161 |
| 9          | rs8176720  | 0.374552  | 0.328674     | 0.033144161 |
| 11         | rs2514088  | 0.124549  | 0.0956359    | 0.033144161 |
| 1          | rs545711   | 0.232014  | 0.193581     | 0.033162421 |
| 4          | rs1836781  | 0.417563  | 0.465735     | 0.033162421 |
| 8          | rs11774381 | 0.233696  | 0.277588     | 0.033162421 |
| 11         | rs1301784  | 0.412186  | 0.46032      | 0.033162421 |
| 12         | rs12423726 | 0.301444  | 0.348315     | 0.033162421 |
| 13         | rs4770836  | 0.33871   | 0.294619     | 0.033162421 |
| 16         | rs513000   | 0.125448  | 0.0962193    | 0.033162421 |
| 5          | rs6449561  | 0.261649  | 0.221069     | 0.033180691 |
| 6          | rs929051   | 0.375899  | 0.424583     | 0.033180691 |
| 7          | rs11980453 | 0.0394265 | 0.0621806    | 0.033180691 |
| 8          | rs13257034 | 0.317204  | 0.364551     | 0.033180691 |
| 11         | rs1393273  | 0.322581  | 0.369802     | 0.033180691 |
| 15         | rs17421513 | 0.0376344 | 0.0610297    | 0.033180691 |
| 15         | rs8023259  | 0.326165  | 0.282453     | 0.033180691 |
| 5          | rs10477929 | 0.492832  | 0.443801     | 0.033198972 |
| 8          | rs1877839  | 0.268817  | 0.313756     | 0.033198972 |
| 11         | rs11225417 | 0.0863309 | 0.0626066    | 0.033198972 |
| 1          | rs6691412  | 0.240143  | 0.201124     | 0.033217263 |
| 1          | rs9427700  | 0.139785  | 0.108822     | 0.033217263 |
| 2          | rs12713098 | 0.293907  | 0.251538     | 0.033235565 |
| 3          | rs2673460  | 0.349462  | 0.30531      | 0.033235565 |
| 13         | rs2181766  | 0.387097  | 0.341289     | 0.033235565 |
| 14         | rs1244379  | 0.422662  | 0.375468     | 0.033235565 |
| 16         | rs4780287  | 0.358423  | 0.406059     | 0.033235565 |
| 1          | rs12085639 | 0.169065  | 0.135278     | 0.033253877 |
| 2          | rs6712352  | 0.422939  | 0.375894     | 0.033253877 |
| 2          | rs2059741  | 0.0938628 | 0.125298     | 0.033253877 |
| 3          | rs925856   | 0.193841  | 0.234423     | 0.033253877 |
| 18         | rs1941890  | 0.322581  | 0.279652     | 0.033253877 |
| 1          | rs12745456 | 0.317204  | 0.273595     | 0.0332722   |
| 4          | rs3101937  | 0.433692  | 0.385729     | 0.0332722   |
| 8          | rs11785079 | 0.240143  | 0.284079     | 0.0332722   |
| 10         | rs11007117 | 0.489247  | 0.440926     | 0.0332722   |
| 4          | rs17054309 | 0.206093  | 0.169338     | 0.033290533 |
| 13         | rs2136268  | 0.258065  | 0.217302     | 0.033290533 |

Table DS2: All SNPs tested for association (RDC SABP vs. controls) with the Cochran-Armitage trend test and significant at the p=0.05 threshold.

| chromosome | SNP        | MAF_cases | MAF_controls | p_value     |
|------------|------------|-----------|--------------|-------------|
| 14         | rs2150541  | 0.385305  | 0.339182     | 0.033290533 |
| 16         | rs1900718  | 0.4319    | 0.480239     | 0.033290533 |
| 16         | rs12921051 | 0.0842294 | 0.0608799    | 0.033290533 |
| 1          | rs233124   | 0.348375  | 0.395087     | 0.033308877 |
| 4          | rs233968   | 0.333333  | 0.289267     | 0.033308877 |
| 5          | rs2081858  | 0.304659  | 0.350698     | 0.033308877 |
| 18         | rs478692   | 0.359712  | 0.407944     | 0.033308877 |
| 3          | rs2053859  | 0.295699  | 0.341172     | 0.033327231 |
| 3          | rs12632067 | 0.516245  | 0.466872     | 0.033327231 |
| 4          | rs7667016  | 0.353047  | 0.308217     | 0.033327231 |
| 8          | rs17635461 | 0.203971  | 0.167462     | 0.033327231 |
| 13         | rs11620298 | 0.0752688 | 0.104373     | 0.033327231 |
| 16         | rs1344484  | 0.354839  | 0.402281     | 0.033327231 |
| 2          | rs1461954  | 0.159498  | 0.127046     | 0.033345596 |
| 7          | rs1076224  | 0.361511  | 0.40906      | 0.033345596 |
| 11         | rs4426098  | 0.464158  | 0.416326     | 0.033345596 |
| 16         | rs2550689  | 0.28853   | 0.334301     | 0.033345596 |
| 1          | rs1352556  | 0.458781  | 0.410873     | 0.033363972 |
| 7          | rs10274875 | 0.446237  | 0.494721     | 0.033363972 |
| 9          | rs566587   | 0.431655  | 0.385009     | 0.033363972 |
| 10         | rs7910788  | 0.302158  | 0.259707     | 0.033363972 |
| 12         | rs2070876  | 0.427798  | 0.380587     | 0.033363972 |
| 15         | rs293384   | 0.401434  | 0.449147     | 0.033363972 |
| 16         | rs1424066  | 0.433692  | 0.386201     | 0.033363972 |
| 1          | rs10873788 | 0.203971  | 0.246248     | 0.033382358 |
| 3          | rs2276860  | 0.268817  | 0.313522     | 0.033382358 |
| 6          | rs12662900 | 0.324373  | 0.28075      | 0.033382358 |
| 6          | rs4383853  | 0.182796  | 0.148211     | 0.033382358 |
| 12         | rs10777264 | 0.422939  | 0.375512     | 0.033382358 |
| 16         | rs2102280  | 0.24552   | 0.205692     | 0.033382358 |
| 4          | rs1402788  | 0.163082  | 0.12999      | 0.033400755 |
| 4          | rs1876073  | 0.431655  | 0.384288     | 0.033400755 |
| 9          | rs7048496  | 0.0949821 | 0.126919     | 0.033400755 |
| 10         | rs2490699  | 0.431655  | 0.47987      | 0.033400755 |
| 12         | rs10466956 | 0.112903  | 0.0856118    | 0.033400755 |
| 2          | rs10186907 | 0.0645161 | 0.0920423    | 0.033419162 |
| 3          | rs9825965  | 0.460573  | 0.412777     | 0.033419162 |
| 4          | rs7676405  | 0.308244  | 0.265257     | 0.033419162 |
| 9          | rs7859587  | 0.473118  | 0.424949     | 0.033419162 |
| 11         | rs6592177  | 0.327957  | 0.283396     | 0.033419162 |
| 13         | rs1475797  | 0.378136  | 0.426405     | 0.033419162 |
| 4          | rs2637713  | 0.0842294 | 0.114519     | 0.03343758  |
| 7          | rs2348285  | 0.446237  | 0.494717     | 0.03343758  |
| 9          | rs17259350 | 0.116487  | 0.0888472    | 0.03343758  |
| 10         | rs161016   | 0.410394  | 0.36376      | 0.03343758  |
| 11         | rs7102678  | 0.155914  | 0.194312     | 0.03343758  |
| 15         | rs8031935  | 0.306452  | 0.263481     | 0.03343758  |
| 1          | rs1570355  | 0.543011  | 0.494044     | 0.033456009 |
| 3          | rs7636734  | 0.496416  | 0.447736     | 0.033456009 |
| 13         | rs1417285  | 0.27957   | 0.23799      | 0.033456009 |
| 18         | rs1469295  | 0.269784  | 0.314695     | 0.033456009 |
| 1          | rs2136243  | 0.297491  | 0.343718     | 0.033474448 |

Table DS2 All SNPs tested for association (RDC SABP vs. controls) with the Cochran-Armitage trend test and significant at the p=0.05 threshold.

| chromosome | SNP           | MAF_cases | MAF_controls | p_value     |
|------------|---------------|-----------|--------------|-------------|
| 3          | rs3804141     | 0.0501792 | 0.075835     | 0.033474448 |
| 10         | rs10490958    | 0.351254  | 0.306331     | 0.033474448 |
| 14         | rs9285602     | 0.394265  | 0.347582     | 0.033474448 |
| 15         | rs936111      | 0.179211  | 0.145073     | 0.033474448 |
| 16         | rs11644367    | 0.428058  | 0.47632      | 0.033474448 |
| 7          | rs10242225    | 0.294964  | 0.340429     | 0.033492898 |
| 8          | rs11779401    | 0.388489  | 0.436286     | 0.033492898 |
| 10         | rs11000693    | 0.277778  | 0.236466     | 0.033492898 |
| 10         | rs11016759    | 0.120072  | 0.154937     | 0.033492898 |
| 14         | rs11627566    | 0.320789  | 0.366951     | 0.033492898 |
| 3          | rs2141034     | 0.141577  | 0.111225     | 0.033511358 |
| 18         | rs16957481    | 0.327957  | 0.284424     | 0.033511358 |
| 20         | rs12624669    | 0.103943  | 0.0775656    | 0.033511358 |
| 1          | rs1339337     | 0.22043   | 0.263032     | 0.033529829 |
| 1          | rs2820037     | 0.175627  | 0.141008     | 0.033529829 |
| 6          | rs1329542     | 0.270609  | 0.229131     | 0.033529829 |
| 6          | rs9347875     | 0.106115  | 0.139154     | 0.033529829 |
| 17         | rs2289607     | 0.149281  | 0.187159     | 0.033529829 |
| 2          | rs13405989    | 0.40681   | 0.455722     | 0.033548311 |
| 2          | rs16829491    | 0.175627  | 0.141493     | 0.033548311 |
| 2          | rs4667970     | 0.318345  | 0.364998     | 0.033548311 |
| 5          | rs4428437     | 0.464158  | 0.417092     | 0.033548311 |
| 6          | rs1883447     | 0.09319   | 0.125298     | 0.033548311 |
| 7          | rs6969642     | 0.379928  | 0.428109     | 0.033548311 |
| 11         | rs11223699    | 0.103943  | 0.137138     | 0.033548311 |
| 13         | rs10508138    | 0.255396  | 0.215526     | 0.033548311 |
| 8          | rs1350556     | 0.217626  | 0.179426     | 0.033566803 |
| 11         | rs10766384    | 0.320789  | 0.27702      | 0.033566803 |
| 18         | rs9964424     | 0.318996  | 0.276262     | 0.033566803 |
| 22         | rs17002034    | 0.11828   | 0.0902422    | 0.033566803 |
| 5          | rs846946      | 0.472924  | 0.425162     | 0.033585306 |
| 16         | rs9302807     | 0.303957  | 0.350767     | 0.033585306 |
| 4          | rs13125760    | 0.516129  | 0.467769     | 0.03360382  |
| 5          | SNP_A-2022889 | 0.250896  | 0.211172     | 0.03360382  |
| 11         | rs7951896     | 0.207885  | 0.249233     | 0.03360382  |
| 11         | rs6483477     | 0.139785  | 0.17637      | 0.03360382  |
| 16         | rs11639552    | 0.392473  | 0.440505     | 0.03360382  |
| 1          | rs6671591     | 0.535842  | 0.48756      | 0.033622344 |
| 2          | rs11894600    | 0.0770609 | 0.107155     | 0.033622344 |
| 8          | rs10103808    | 0.062724  | 0.0900547    | 0.033622344 |
| 15         | rs1896807     | 0.24552   | 0.206333     | 0.033622344 |
| 20         | rs2093148     | 0.197133  | 0.160927     | 0.033622344 |
| 4          | rs17581311    | 0.455197  | 0.407123     | 0.033640879 |
| 4          | rs10018129    | 0.413669  | 0.461525     | 0.033640879 |
| 10         | rs10997145    | 0.0431655 | 0.0670648    | 0.033640879 |
| 11         | rs531917      | 0.384892  | 0.338671     | 0.033659425 |
| 16         | rs7206197     | 0.118705  | 0.153152     | 0.033659425 |
| 2          | rs16867415    | 0.0773381 | 0.0551771    | 0.033677981 |
| 3          | rs1039024     | 0.326165  | 0.283083     | 0.033677981 |
| 8          | rs11785512    | 0.204301  | 0.245829     | 0.033677981 |
| 14         | rs879851      | 0.38172   | 0.335831     | 0.033677981 |
| 16         | rs1111230     | 0.453405  | 0.502044     | 0.033677981 |

Table DS2: All SNPs tested for association (RDC SABP vs. controls) with the Cochran-Armitage trend test and significant at the p=0.05 threshold.

| chromosome | SNP           | MAF_cases | MAF_controls | p_value     |
|------------|---------------|-----------|--------------|-------------|
| 1          | rs2376022     | 0.0863309 | 0.0623935    | 0.033696548 |
| 3          | rs6795178     | 0.307554  | 0.264906     | 0.033696548 |
| 4          | rs10007995    | 0.399642  | 0.448364     | 0.033696548 |
| 13         | rs2490967     | 0.136201  | 0.105999     | 0.033696548 |
| 17         | rs7213702     | 0.0448029 | 0.0687777    | 0.033696548 |
| 18         | rs9952684     | 0.179211  | 0.21908      | 0.033696548 |
| 1          | rs533483      | 0.283154  | 0.241479     | 0.033715126 |
| 2          | rs11674647    | 0.154122  | 0.122574     | 0.033715126 |
| 4          | rs10006360    | 0.0394265 | 0.0626917    | 0.033715126 |
| 5          | rs960452      | 0.449821  | 0.402148     | 0.033715126 |
| 7          | rs2299257     | 0.345324  | 0.392881     | 0.033715126 |
| 8          | rs7017961     | 0.294224  | 0.340102     | 0.033715126 |
| 10         | rs1503904     | 0.259928  | 0.304645     | 0.033715126 |
| 15         | rs4405525     | 0.178058  | 0.218154     | 0.033715126 |
| 18         | rs2044012     | 0.379928  | 0.33373      | 0.033715126 |
| 18         | rs11082922    | 0.329749  | 0.285593     | 0.033715126 |
| 1          | rs7519865     | 0.0878136 | 0.118529     | 0.033733714 |
| 2          | rs10173714    | 0.453069  | 0.501875     | 0.033733714 |
| 3          | rs2317750     | 0.370968  | 0.418569     | 0.033733714 |
| 13         | SNP_A-1852125 | 0.456989  | 0.409277     | 0.033733714 |
| 15         | rs4375605     | 0.453237  | 0.405908     | 0.033733714 |
| 16         | rs1111223     | 0.0698925 | 0.0978187    | 0.033733714 |
| 16         | rs3826122     | 0.193548  | 0.158029     | 0.033733714 |
| 18         | rs7407082     | 0.358423  | 0.313522     | 0.033733714 |
| 5          | rs12658519    | 0.234767  | 0.195941     | 0.033752314 |
| 7          | rs3801211     | 0.38172   | 0.336512     | 0.033752314 |
| 13         | rs2761388     | 0.492832  | 0.444482     | 0.033752314 |
| 16         | rs12920919    | 0.390681  | 0.344528     | 0.033752314 |
| 2          | rs2716692     | 0.453237  | 0.405193     | 0.033770923 |
| 5          | rs10942029    | 0.0415162 | 0.0650171    | 0.033770923 |
| 8          | rs4909376     | 0.387097  | 0.435495     | 0.033770923 |
| 14         | rs7161611     | 0.306452  | 0.263221     | 0.033770923 |
| 15         | rs4357923     | 0.482014  | 0.433946     | 0.033770923 |
| 20         | rs2325842     | 0.476534  | 0.42789      | 0.033770923 |
| 3          | rs6784661     | 0.308244  | 0.265668     | 0.033789544 |
| 4          | rs2584346     | 0.0812274 | 0.11149      | 0.033789544 |
| 5          | rs190034      | 0.467742  | 0.419673     | 0.033789544 |
| 9          | rs10760155    | 0.471223  | 0.422802     | 0.033789544 |
| 1          | rs1546264     | 0.197133  | 0.23799      | 0.033808175 |
| 2          | rs17024145    | 0.408602  | 0.361575     | 0.033808175 |
| 3          | rs6438104     | 0.362007  | 0.316462     | 0.033808175 |
| 4          | rs6854347     | 0.15343   | 0.191388     | 0.033808175 |
| 7          | rs10488497    | 0.234767  | 0.278915     | 0.033808175 |
| 8          | rs4573318     | 0.173835  | 0.213067     | 0.033808175 |
| 10         | rs2038577     | 0.189964  | 0.15475      | 0.033808175 |
| 10         | rs11200762    | 0.277174  | 0.322487     | 0.033808175 |
| 11         | rs7931872     | 0.369176  | 0.417405     | 0.033808175 |
| 13         | rs1359478     | 0.258065  | 0.217451     | 0.033808175 |
| 22         | rs2207451     | 0.28853   | 0.246421     | 0.033808175 |
| 1          | rs7548984     | 0.270609  | 0.315143     | 0.033826817 |
| 7          | rs12532057    | 0.301075  | 0.346835     | 0.033826817 |
| 12         | rs1175500     | 0.322581  | 0.278705     | 0.033826817 |

Table DS2: All SNPs tested for association (RDC SABP vs. controls) with the Cochran-Armitage trend test and significant at the p=0.05 threshold.

| chromosome | SNP        | MAF_cases | MAF_controls | p_value     |
|------------|------------|-----------|--------------|-------------|
| 4          | rs4422479  | 0.189964  | 0.230494     | 0.03384547  |
| 5          | rs4704509  | 0.25448   | 0.298807     | 0.03384547  |
| 5          | rs1510063  | 0.208333  | 0.250085     | 0.03384547  |
| 5          | rs2964653  | 0.435252  | 0.484322     | 0.03384547  |
| 15         | rs11073133 | 0.291367  | 0.249233     | 0.03384547  |
| 15         | rs17183085 | 0.0413669 | 0.0644172    | 0.03384547  |
| 1          | rs4484966  | 0.120504  | 0.0921635    | 0.033864134 |
| 1          | rs12087641 | 0.204301  | 0.245734     | 0.033864134 |
| 2          | rs10196193 | 0.351254  | 0.397921     | 0.033864134 |
| 5          | rs17061102 | 0.18638   | 0.150988     | 0.033864134 |
| 6          | rs228446   | 0.405018  | 0.358992     | 0.033864134 |
| 7          | rs6971616  | 0.397112  | 0.444767     | 0.033864134 |
| 10         | rs1975458  | 0.413669  | 0.461945     | 0.033864134 |
| 16         | rs13330623 | 0.0770609 | 0.0547035    | 0.033864134 |
| 19         | rs12461618 | 0.469534  | 0.42195      | 0.033864134 |
| 21         | rs2829547  | 0.530466  | 0.4821       | 0.033864134 |
| 2          | rs7599060  | 0.393502  | 0.346351     | 0.033882808 |
| 4          | rs6551666  | 0.215054  | 0.256305     | 0.033882808 |
| 6          | rs9374204  | 0.336918  | 0.292093     | 0.033882808 |
| 18         | rs216567   | 0.3213    | 0.368861     | 0.033882808 |
| 1          | rs4912173  | 0.0989209 | 0.13166      | 0.033901493 |
| 12         | rs11611737 | 0.127698  | 0.163147     | 0.033901493 |
| 18         | rs12456880 | 0.179856  | 0.220123     | 0.033901493 |
| 4          | rs10026591 | 0.249104  | 0.292916     | 0.033920189 |
| 5          | rs369844   | 0.336331  | 0.292093     | 0.033920189 |
| 7          | rs10267502 | 0.121864  | 0.156505     | 0.033920189 |
| 10         | rs3907196  | 0.170863  | 0.209386     | 0.033920189 |
| 11         | rs10502001 | 0.271583  | 0.230153     | 0.033920189 |
| 20         | rs10485801 | 0.0881295 | 0.11925      | 0.033920189 |
| 21         | rs4816665  | 0.24552   | 0.206914     | 0.033920189 |
| 6          | rs11155003 | 0.189964  | 0.230507     | 0.033938895 |
| 6          | rs603092   | 0.277778  | 0.23712      | 0.033938895 |
| 11         | rs1793527  | 0.239209  | 0.200512     | 0.033938895 |
| 16         | rs1528337  | 0.435252  | 0.3887       | 0.033938895 |
| 21         | rs9983387  | 0.136201  | 0.1059       | 0.033938895 |
| 1          | rs6698185  | 0.107527  | 0.141253     | 0.033957613 |
| 1          | rs2036407  | 0.354317  | 0.309475     | 0.033957613 |
| 14         | rs1461645  | 0.0806452 | 0.0576923    | 0.033957613 |
| 10         | rs1904667  | 0.489209  | 0.441146     | 0.033976341 |
| 12         | rs188551   | 0.507168  | 0.459086     | 0.033976341 |
| 13         | rs287551   | 0.129032  | 0.0997956    | 0.033976341 |
| 13         | rs7337292  | 0.435484  | 0.388151     | 0.033976341 |
| 16         | rs8056052  | 0.38172   | 0.42952      | 0.033976341 |
| 6          | rs1360468  | 0.293907  | 0.251534     | 0.03399508  |
| 18         | rs10871580 | 0.195341  | 0.236385     | 0.03399508  |
| 2          | rs2268987  | 0.197133  | 0.16091      | 0.034013829 |
| 3          | rs5009801  | 0.370968  | 0.418454     | 0.034013829 |
| 3          | rs9875156  | 0.370968  | 0.418454     | 0.034013829 |
| 3          | rs12497154 | 0.370968  | 0.418454     | 0.034013829 |
| 14         | rs2074932  | 0.32554   | 0.372275     | 0.034013829 |
| 16         | rs6564592  | 0.268817  | 0.227319     | 0.034013829 |
| 16         | rs11648855 | 0.284946  | 0.243275     | 0.034013829 |



Table DS2: All SNPs tested for association (RDC SABP vs. controls) with the Cochran-Armitage trend test and significant at the p=0.05 threshold.

| chromosome | SNP        | MAF_cases | MAF_controls | p_value     |
|------------|------------|-----------|--------------|-------------|
| 14         | rs712342   | 0.281362  | 0.239175     | 0.03403259  |
| 14         | rs8007026  | 0.365591  | 0.319748     | 0.03403259  |
| 6          | rs17654108 | 0.18638   | 0.1515       | 0.034051361 |
| 1          | rs10927613 | 0.363799  | 0.318275     | 0.034070143 |
| 4          | rs2278672  | 0.360215  | 0.315225     | 0.034070143 |
| 10         | rs2577355  | 0.24552   | 0.288828     | 0.034070143 |
| 13         | rs2260894  | 0.134892  | 0.104985     | 0.034070143 |
| 18         | rs17644227 | 0.364621  | 0.319374     | 0.034070143 |
| 20         | rs6057051  | 0.159498  | 0.127174     | 0.034070143 |
| 3          | rs2717235  | 0.31362   | 0.269912     | 0.034088936 |
| 4          | rs1462598  | 0.179211  | 0.2189       | 0.034088936 |
| 5          | rs929458   | 0.306452  | 0.263472     | 0.034088936 |
| 11         | rs211135   | 0.424731  | 0.472913     | 0.034088936 |
| 11         | rs11221580 | 0.208633  | 0.17212      | 0.034088936 |
| 5          | rs7729934  | 0.268817  | 0.31412      | 0.03410774  |
| 16         | rs1672811  | 0.214029  | 0.25596      | 0.03410774  |
| 16         | rs8046479  | 0.345324  | 0.393125     | 0.03410774  |
| 17         | rs9902439  | 0.523297  | 0.475298     | 0.03410774  |
| 1          | rs4233229  | 0.178058  | 0.143637     | 0.034126555 |
| 2          | rs17456648 | 0.353047  | 0.308138     | 0.034126555 |
| 2          | rs17356207 | 0.167266  | 0.206263     | 0.034126555 |
| 4          | rs7670324  | 0.403226  | 0.451822     | 0.034126555 |
| 5          | rs26929    | 0.0609319 | 0.0877641    | 0.034126555 |
| 6          | rs10498686 | 0.142086  | 0.179339     | 0.034126555 |
| 6          | rs10485001 | 0.340502  | 0.386998     | 0.034126555 |
| 8          | rs10106730 | 0.157706  | 0.196118     | 0.034126555 |
| 8          | rs1492649  | 0.218638  | 0.18157      | 0.034126555 |
| 8          | rs17422137 | 0.164875  | 0.203407     | 0.034126555 |
| 10         | rs1592050  | 0.305054  | 0.262351     | 0.034126555 |
| 1          | rs4628571  | 0.47491   | 0.427865     | 0.034145381 |
| 1          | rs6692645  | 0.437276  | 0.390119     | 0.034145381 |
| 2          | rs1565073  | 0.442652  | 0.491971     | 0.034145381 |
| 13         | rs1538801  | 0.232975  | 0.194208     | 0.034145381 |
| 15         | rs8024461  | 0.455197  | 0.503745     | 0.034145381 |
| 18         | rs17752493 | 0.0503597 | 0.0759796    | 0.034145381 |
| 18         | rs6508087  | 0.120504  | 0.15526      | 0.034145381 |
| 8          | rs2921060  | 0.48741   | 0.438779     | 0.034164217 |
| 11         | rs1508607  | 0.252688  | 0.296252     | 0.034164217 |
| 3          | rs4684288  | 0.0860215 | 0.0626494    | 0.034183064 |
| 5          | rs7718817  | 0.112903  | 0.147289     | 0.034183064 |
| 9          | rs503897   | 0.392473  | 0.34656      | 0.034183064 |
| 10         | rs2022377  | 0.0770609 | 0.107046     | 0.034183064 |
| 16         | rs2941709  | 0.324373  | 0.280845     | 0.034183064 |
| 2          | rs6544414  | 0.396057  | 0.349847     | 0.034201922 |
| 3          | rs7629239  | 0.0611511 | 0.0880546    | 0.034201922 |
| 7          | rs17322413 | 0.09319   | 0.0682827    | 0.034201922 |
| 8          | rs17347874 | 0.120072  | 0.154738     | 0.034201922 |
| 17         | rs16954363 | 0.125448  | 0.0962722    | 0.034201922 |
| 17         | rs202121   | 0.224014  | 0.26728      | 0.034201922 |
| 20         | rs601470   | 0.383513  | 0.337483     | 0.034201922 |
| 1          | rs10493174 | 0.176259  | 0.215162     | 0.034220791 |
| 3          | rs11710959 | 0.266187  | 0.311202     | 0.034220791 |

Table DS2: All SNPs tested for association (RDC SABP vs. controls) with the Cochran-Armitage trend test and significant at the p=0.05 threshold.

| chromosome | SNP        | MAF_cases | MAF_controls | p_value     |
|------------|------------|-----------|--------------|-------------|
| 8          | rs2119530  | 0.238351  | 0.28175      | 0.034220791 |
| 9          | rs10122135 | 0.215827  | 0.178365     | 0.034220791 |
| 10         | rs11193695 | 0.392473  | 0.346901     | 0.034220791 |
| 13         | rs9535862  | 0.417563  | 0.4651       | 0.034220791 |
| 16         | rs1348665  | 0.0701439 | 0.0984668    | 0.034220791 |
| 18         | rs8094680  | 0.257194  | 0.217302     | 0.034220791 |
| 1          | rs12090588 | 0.148746  | 0.186114     | 0.034239671 |
| 2          | rs6713895  | 0.172662  | 0.211755     | 0.034239671 |
| 6          | rs763517   | 0.293907  | 0.251533     | 0.034239671 |
| 14         | rs17096617 | 0.405018  | 0.358311     | 0.034239671 |
| 16         | rs1345870  | 0.478495  | 0.430447     | 0.034239671 |
| 22         | rs2051592  | 0.154122  | 0.122105     | 0.034239671 |
| 3          | rs6414257  | 0.405018  | 0.358725     | 0.034258562 |
| 7          | rs4727994  | 0.236559  | 0.198055     | 0.034258562 |
| 13         | rs9536792  | 0.537634  | 0.489785     | 0.034258562 |
| 2          | rs11681519 | 0.228417  | 0.190655     | 0.034277464 |
| 4          | rs2175068  | 0.209386  | 0.172861     | 0.034277464 |
| 4          | rs1017667  | 0.508993  | 0.460007     | 0.034277464 |
| 2          | rs7600321  | 0.227599  | 0.189373     | 0.034296376 |
| 6          | rs17053071 | 0.0304659 | 0.0517711    | 0.034296376 |
| 6          | rs9365243  | 0.204301  | 0.167745     | 0.034296376 |
| 7          | rs12718166 | 0.213262  | 0.255106     | 0.034296376 |
| 8          | rs17685416 | 0.0377698 | 0.0602451    | 0.034296376 |
| 8          | rs2609616  | 0.222222  | 0.183969     | 0.034296376 |
| 18         | rs9957562  | 0.321942  | 0.278347     | 0.034296376 |
| 1          | rs835344   | 0.403226  | 0.451618     | 0.0343153   |
| 3          | rs1520653  | 0.370968  | 0.418371     | 0.0343153   |
| 11         | rs7946787  | 0.236462  | 0.197476     | 0.0343153   |
| 16         | rs2932819  | 0.142086  | 0.178924     | 0.0343153   |
| 1          | rs683880   | 0.281362  | 0.240116     | 0.034334234 |
| 4          | rs4697429  | 0.244604  | 0.20522      | 0.034334234 |
| 18         | rs9949102  | 0.130824  | 0.16661      | 0.034334234 |
| 20         | rs1571518  | 0.0985663 | 0.130843     | 0.034353179 |
| 2          | rs7577271  | 0.125448  | 0.0968569    | 0.034372135 |
| 3          | rs4234464  | 0.437276  | 0.486035     | 0.034372135 |
| 6          | rs10499026 | 0.202166  | 0.165587     | 0.034372135 |
| 12         | rs7967559  | 0.189964  | 0.15458      | 0.034372135 |
| 1          | rs8179356  | 0.28777   | 0.332595     | 0.034391103 |
| 2          | rs953006   | 0.0647482 | 0.0927062    | 0.034391103 |
| 4          | rs1441064  | 0.173835  | 0.213483     | 0.034391103 |
| 5          | rs2248878  | 0.469534  | 0.422173     | 0.034391103 |
| 5          | rs255561   | 0.419355  | 0.467813     | 0.034391103 |
| 5          | rs257059   | 0.221223  | 0.2634       | 0.034391103 |
| 7          | rs6953980  | 0.204301  | 0.167575     | 0.034391103 |
| 8          | rs3892265  | 0.0716846 | 0.0502213    | 0.034391103 |
| 12         | rs2041769  | 0.164875  | 0.203578     | 0.034391103 |
| 4          | rs13134194 | 0.494624  | 0.446356     | 0.034410081 |
| 5          | rs1363883  | 0.330935  | 0.286202     | 0.034410081 |
| 5          | rs12514766 | 0.197842  | 0.162411     | 0.034410081 |
| 11         | rs1390174  | 0.521505  | 0.473415     | 0.034410081 |
| 11         | rs12289202 | 0.151079  | 0.188396     | 0.034410081 |
| 15         | rs1623753  | 0.361511  | 0.409106     | 0.034410081 |

Table DS2: All SNPs tested for association (RDC SABP vs. controls) with the Cochran-Armitage trend test and significant at the p=0.05 threshold.

| chromosome | SNP        | MAF_cases | MAF_controls | p_value     |
|------------|------------|-----------|--------------|-------------|
| 1          | rs4246534  | 0.388889  | 0.343047     | 0.03442907  |
| 2          | rs6732625  | 0.09319   | 0.124744     | 0.03442907  |
| 2          | rs13427761 | 0.370968  | 0.418541     | 0.03442907  |
| 4          | rs2709842  | 0.390681  | 0.43848      | 0.03442907  |
| 6          | rs12212067 | 0.0701439 | 0.0987718    | 0.03442907  |
| 11         | rs587925   | 0.353791  | 0.308126     | 0.03442907  |
| 13         | rs17682494 | 0.286738  | 0.245235     | 0.03442907  |
| 21         | rs6517303  | 0.424731  | 0.473586     | 0.03442907  |
| 1          | rs1510310  | 0.110108  | 0.0832196    | 0.03444807  |
| 5          | rs200107   | 0.390681  | 0.344569     | 0.03444807  |
| 5          | rs708459   | 0.419355  | 0.466962     | 0.03444807  |
| 9          | rs7033529  | 0.104693  | 0.137649     | 0.03444807  |
| 10         | rs3829918  | 0.307554  | 0.265157     | 0.03444807  |
| 12         | rs10751692 | 0.422383  | 0.375855     | 0.03444807  |
| 13         | rs773350   | 0.422939  | 0.376064     | 0.03444807  |
| 13         | rs9519494  | 0.374101  | 0.328625     | 0.03444807  |
| 16         | rs8054870  | 0.166667  | 0.133743     | 0.03444807  |
| 16         | rs1874536  | 0.320789  | 0.367462     | 0.03444807  |
| 1          | rs17406602 | 0.397849  | 0.445863     | 0.034467081 |
| 3          | rs2054740  | 0.116487  | 0.150358     | 0.034467081 |
| 4          | rs17539582 | 0.0863309 | 0.0627558    | 0.034467081 |
| 6          | rs2153535  | 0.44964   | 0.498465     | 0.034467081 |
| 7          | rs4074568  | 0.181004  | 0.146146     | 0.034467081 |
| 11         | rs4414197  | 0.25448   | 0.298978     | 0.034467081 |
| 19         | rs8111313  | 0.283154  | 0.329302     | 0.034467081 |
| 4          | rs2724567  | 0.390288  | 0.43812      | 0.034486103 |
| 12         | rs2363600  | 0.505396  | 0.457523     | 0.034486103 |
| 1          | rs6669417  | 0.308244  | 0.264816     | 0.034505136 |
| 2          | rs2305573  | 0.277778  | 0.235685     | 0.034505136 |
| 2          | rs13033217 | 0.410394  | 0.459243     | 0.034505136 |
| 7          | rs4727570  | 0.348921  | 0.304096     | 0.034505136 |
| 9          | rs16906093 | 0.191756  | 0.156271     | 0.034505136 |
| 9          | rs4744027  | 0.191756  | 0.156271     | 0.034505136 |
| 11         | rs11023054 | 0.335125  | 0.38144      | 0.034505136 |
| 11         | rs7947746  | 0.419065  | 0.372786     | 0.034505136 |
| 20         | rs2295492  | 0.393885  | 0.441678     | 0.034505136 |
| 3          | rs9876904  | 0.323741  | 0.370276     | 0.034524179 |
| 13         | rs4303351  | 0.260791  | 0.220839     | 0.034524179 |
| 13         | rs7327118  | 0.197842  | 0.238931     | 0.034524179 |
| 13         | rs912941   | 0.0971223 | 0.0715995    | 0.034524179 |
| 4          | rs13146686 | 0.369176  | 0.41624      | 0.034543234 |
| 4          | rs10454251 | 0.390681  | 0.43848      | 0.034543234 |
| 1          | rs10493595 | 0.240143  | 0.201434     | 0.0345623   |
| 11         | rs4910014  | 0.124101  | 0.158836     | 0.0345623   |
| 16         | rs5004760  | 0.356631  | 0.403105     | 0.0345623   |
| 12         | rs248818   | 0.267148  | 0.226776     | 0.034581377 |
| 15         | rs11070410 | 0.231183  | 0.273672     | 0.034581377 |
| 16         | rs7187986  | 0.0555556 | 0.0816014    | 0.034581377 |
| 16         | rs9923707  | 0.0555556 | 0.0816014    | 0.034581377 |
| 2          | rs4665809  | 0.167266  | 0.205902     | 0.034600465 |
| 2          | rs2879878  | 0.175627  | 0.141811     | 0.034600465 |
| 9          | rs10760153 | 0.471119  | 0.422788     | 0.034600465 |

Table DS2: All SNPs tested for association (RDC SABP vs. controls) with the Cochran-Armitage trend test and significant at the p=0.05 threshold.

| chromosome | SNP        | MAF_cases | MAF_controls | p_value     |
|------------|------------|-----------|--------------|-------------|
| 10         | rs10508840 | 0.116487  | 0.150648     | 0.034600465 |
| 11         | rs2511082  | 0.366906  | 0.414738     | 0.034600465 |
| 14         | rs2079499  | 0.129032  | 0.16468      | 0.034600465 |
| 15         | rs1002514  | 0.104693  | 0.0783009    | 0.034600465 |
| 16         | rs9937943  | 0.252708  | 0.212312     | 0.034600465 |
| 4          | rs3792211  | 0.376344  | 0.330664     | 0.034619564 |
| 4          | rs17090336 | 0.234767  | 0.196453     | 0.034619564 |
| 4          | rs1402787  | 0.433692  | 0.386751     | 0.034619564 |
| 5          | rs455117   | 0.378136  | 0.425496     | 0.034619564 |
| 7          | rs6467126  | 0.239209  | 0.282549     | 0.034619564 |
| 18         | rs7229171  | 0.15233   | 0.189973     | 0.034619564 |
| 22         | rs165670   | 0.485663  | 0.4375       | 0.034619564 |
| 1          | rs11203368 | 0.433692  | 0.386921     | 0.034638674 |
| 1          | rs2814046  | 0.28777   | 0.332538     | 0.034638674 |
| 4          | rs936589   | 0.417266  | 0.465429     | 0.034638674 |
| 8          | rs2935766  | 0.149281  | 0.186755     | 0.034638674 |
| 10         | rs11004515 | 0.129032  | 0.0996587    | 0.034638674 |
| 11         | rs8177388  | 0.0896057 | 0.120566     | 0.034638674 |
| 14         | rs11845173 | 0.0359712 | 0.0579019    | 0.034638674 |
| 18         | rs17628762 | 0.381295  | 0.335206     | 0.034638674 |
| 1          | rs12044442 | 0.372302  | 0.420075     | 0.034657795 |
| 3          | rs1877544  | 0.134409  | 0.10477      | 0.034657795 |
| 4          | rs6823069  | 0.22043   | 0.183151     | 0.034657795 |
| 4          | rs11735639 | 0.154122  | 0.191652     | 0.034657795 |
| 8          | rs584541   | 0.176259  | 0.142322     | 0.034657795 |
| 9          | rs676932   | 0.209677  | 0.251448     | 0.034657795 |
| 11         | rs3934815  | 0.292115  | 0.337645     | 0.034657795 |
| 13         | rs9534613  | 0.261649  | 0.221465     | 0.034657795 |
| 2          | rs1396133  | 0.394265  | 0.348263     | 0.034676927 |
| 5          | rs13189973 | 0.239209  | 0.200272     | 0.034676927 |
| 6          | rs17556952 | 0.179211  | 0.219591     | 0.034676927 |
| 8          | rs11989307 | 0.157609  | 0.196075     | 0.034676927 |
| 9          | rs17789217 | 0.354839  | 0.310116     | 0.034676927 |
| 11         | rs10831675 | 0.213262  | 0.17615      | 0.034676927 |
| 7          | rs6979600  | 0.213262  | 0.255026     | 0.03469607  |
| 7          | rs4719045  | 0.0706522 | 0.0996241    | 0.03469607  |
| 8          | rs1373387  | 0.09319   | 0.12419      | 0.03469607  |
| 14         | rs8006818  | 0.34296   | 0.298943     | 0.03469607  |
| 1          | rs10921219 | 0.360215  | 0.407559     | 0.034715224 |
| 8          | rs2719277  | 0.182796  | 0.14782      | 0.034715224 |
| 10         | rs11004466 | 0.129496  | 0.0999659    | 0.034715224 |
| 10         | rs7073314  | 0.295699  | 0.253576     | 0.034715224 |
| 10         | rs7099404  | 0.541219  | 0.493354     | 0.034715224 |
| 1          | rs2248698  | 0.421147  | 0.469134     | 0.034734389 |
| 2          | rs7573518  | 0.229391  | 0.272061     | 0.034734389 |
| 3          | rs9815265  | 0.508961  | 0.461355     | 0.034734389 |
| 5          | rs830871   | 0.143369  | 0.180068     | 0.034734389 |
| 11         | rs7396009  | 0.353047  | 0.308768     | 0.034734389 |
| 14         | rs17179664 | 0.201439  | 0.164905     | 0.034734389 |
| 15         | rs17819096 | 0.370504  | 0.325324     | 0.034734389 |
| 3          | rs6773049  | 0.028777  | 0.0494543    | 0.034753565 |
| 6          | rs441539   | 0.335125  | 0.381521     | 0.034753565 |

Table DS2: All SNPs tested for association (RDC SABP vs. controls) with the Cochran-Armitage trend test and significant at the p=0.05 threshold.

| chromosome | SNP        | MAF_cases | MAF_controls | p_value     |
|------------|------------|-----------|--------------|-------------|
| 8          | rs17818622 | 0.137993  | 0.107726     | 0.034753565 |
| 11         | rs2512653  | 0.12724   | 0.0979557    | 0.034753565 |
| 12         | rs973328   | 0.322581  | 0.368529     | 0.034753565 |
| 14         | rs4981158  | 0.308244  | 0.265077     | 0.034753565 |
| 18         | rs4390682  | 0.439068  | 0.392845     | 0.034753565 |
| 1          | rs239340   | 0.42446   | 0.472184     | 0.034772752 |
| 7          | rs2283034  | 0.124101  | 0.15923      | 0.034772752 |
| 11         | rs7395893  | 0.0806452 | 0.11077      | 0.034772752 |
| 17         | rs17692444 | 0.491007  | 0.443139     | 0.034772752 |
| 18         | rs17595308 | 0.0703971 | 0.0490463    | 0.034772752 |
| 16         | rs4782275  | 0.138489  | 0.175265     | 0.034791951 |
| 18         | rs17774975 | 0.241877  | 0.202624     | 0.034791951 |
| 1          | rs12129250 | 0.202509  | 0.243257     | 0.03481116  |
| 1          | rs2820038  | 0.17509   | 0.140668     | 0.03481116  |
| 4          | rs1976201  | 0.0960145 | 0.128328     | 0.03481116  |
| 11         | rs4881740  | 0.353047  | 0.308713     | 0.03481116  |
| 17         | rs16968024 | 0.168459  | 0.207155     | 0.03481116  |
| 18         | rs11150978 | 0.145161  | 0.181958     | 0.03481116  |
| 1          | rs10494372 | 0.268817  | 0.228464     | 0.034830381 |
| 5          | rs17701996 | 0.0860215 | 0.0626703    | 0.034830381 |
| 6          | rs1180232  | 0.447842  | 0.400545     | 0.034830381 |
| 13         | rs238328   | 0.448029  | 0.400579     | 0.034830381 |
| 6          | rs9268877  | 0.426523  | 0.380239     | 0.034849612 |
| 13         | rs7986481  | 0.27518   | 0.320225     | 0.034849612 |
| 18         | rs4800259  | 0.252688  | 0.212704     | 0.034849612 |
| 2          | rs16859703 | 0.0758123 | 0.105451     | 0.034868855 |
| 4          | rs17314364 | 0.411871  | 0.365247     | 0.034868855 |
| 16         | rs31982    | 0.519713  | 0.47173      | 0.034868855 |
| 5          | rs6884962  | 0.311828  | 0.357556     | 0.034888109 |
| 6          | rs7356818  | 0.139785  | 0.109615     | 0.034888109 |
| 12         | rs10770927 | 0.15704   | 0.195222     | 0.034888109 |
| 17         | rs9910842  | 0.225806  | 0.188225     | 0.034888109 |
| 20         | rs852017   | 0.235612  | 0.197238     | 0.034888109 |
| 22         | rs132884   | 0.175627  | 0.141616     | 0.034888109 |
| 1          | rs10753559 | 0.303957  | 0.350017     | 0.034907374 |
| 1          | rs239967   | 0.439068  | 0.487223     | 0.034907374 |
| 8          | rs2609651  | 0.182796  | 0.147851     | 0.034907374 |
| 8          | rs6470447  | 0.0899281 | 0.0657357    | 0.034907374 |
| 12         | rs12305806 | 0.259857  | 0.219857     | 0.034907374 |
| 14         | rs10133342 | 0.172043  | 0.138595     | 0.034907374 |
| 15         | rs2655129  | 0.268817  | 0.313629     | 0.034907374 |
| 16         | rs6499203  | 0.271583  | 0.230835     | 0.034907374 |
| 19         | rs1620082  | 0.381295  | 0.335041     | 0.034907374 |
| 20         | rs6119410  | 0.0960145 | 0.071015     | 0.034907374 |
| 4          | rs10517460 | 0.127698  | 0.0985339    | 0.03492665  |
| 6          | rs9390331  | 0.494604  | 0.447359     | 0.03492665  |
| 13         | rs597425   | 0.0322581 | 0.0533583    | 0.034945937 |
| 13         | rs7335400  | 0.123656  | 0.158541     | 0.034945937 |
| 1          | rs7523475  | 0.107527  | 0.141056     | 0.034965236 |
| 3          | rs12715171 | 0.365591  | 0.319857     | 0.034965236 |
| 5          | rs6452501  | 0.422939  | 0.471785     | 0.034965236 |
| 5          | rs17105175 | 0.132616  | 0.102996     | 0.034965236 |

Table DS2: All SNPs tested for association (RDC SABP vs. controls) with the Cochran-Armitage trend test and significant at the p=0.05 threshold.

| chromosome | SNP           | MAF_cases | MAF_controls | p_value     |
|------------|---------------|-----------|--------------|-------------|
| 7          | rs10224683    | 0.334532  | 0.381391     | 0.034965236 |
| 8          | rs6557666     | 0.311828  | 0.357582     | 0.034965236 |
| 10         | rs1006217     | 0.130824  | 0.16661      | 0.034965236 |
| 11         | rs4753552     | 0.458633  | 0.411524     | 0.034965236 |
| 14         | rs10132818    | 0.534296  | 0.486206     | 0.034965236 |
| 14         | rs1956162     | 0.136691  | 0.172173     | 0.034965236 |
| 5          | rs1689680     | 0.151625  | 0.11938      | 0.034984545 |
| 6          | rs4959982     | 0.516245  | 0.4681       | 0.034984545 |
| 7          | rs12540568    | 0.320789  | 0.367099     | 0.034984545 |
| 13         | rs9315892     | 0.190647  | 0.155366     | 0.034984545 |
| 14         | rs4903350     | 0.115108  | 0.149523     | 0.034984545 |
| 19         | rs1834985     | 0.121864  | 0.0934085    | 0.034984545 |
| 2          | rs723705      | 0.189964  | 0.155002     | 0.035003866 |
| 3          | SNP_A-2238650 | 0.0806452 | 0.110789     | 0.035003866 |
| 4          | rs11944669    | 0.338129  | 0.385022     | 0.035003866 |
| 4          | rs2709819     | 0.390681  | 0.438351     | 0.035003866 |
| 6          | rs13205986    | 0.322581  | 0.279272     | 0.035003866 |
| 8          | rs2673590     | 0.483813  | 0.436243     | 0.035003866 |
| 14         | rs7141366     | 0.168459  | 0.135651     | 0.035003866 |
| 15         | rs4775261     | 0.465827  | 0.418117     | 0.035003866 |
| 16         | rs16966881    | 0.0896057 | 0.0653361    | 0.035003866 |
| 21         | rs2836823     | 0.501792  | 0.453631     | 0.035003866 |
| 3          | rs10513627    | 0.154122  | 0.122446     | 0.035023197 |
| 4          | rs6819385     | 0.439068  | 0.487066     | 0.035023197 |
| 7          | rs4518599     | 0.428315  | 0.476442     | 0.035023197 |
| 9          | rs901992      | 0.31362   | 0.270003     | 0.035023197 |
| 16         | rs4984954     | 0.125899  | 0.161378     | 0.035023197 |
| 2          | rs17526033    | 0.222022  | 0.264254     | 0.03504254  |
| 2          | rs2711425     | 0.384892  | 0.339803     | 0.03504254  |
| 5          | rs28068       | 0.523297  | 0.474804     | 0.03504254  |
| 7          | rs7385360     | 0.168459  | 0.207267     | 0.03504254  |
| 1          | rs2576238     | 0.206093  | 0.247103     | 0.035061895 |
| 8          | rs13273164    | 0.208633  | 0.251108     | 0.035061895 |
| 10         | rs2384682     | 0.426523  | 0.475264     | 0.035061895 |
| 13         | rs4943388     | 0.367384  | 0.415248     | 0.035061895 |
| 16         | rs2970077     | 0.106115  | 0.0795144    | 0.035061895 |
| 20         | rs509062      | 0.460573  | 0.413147     | 0.035061895 |
| 8          | rs872137      | 0.27957   | 0.238722     | 0.03508126  |
| 8          | rs10956701    | 0.435484  | 0.388492     | 0.03508126  |
| 9          | rs646885      | 0.510753  | 0.462274     | 0.03508126  |
| 22         | rs737750      | 0.281362  | 0.23953      | 0.03508126  |
| 3          | rs1431968     | 0.225806  | 0.268155     | 0.035100636 |
| 4          | rs2631265     | 0.124549  | 0.0962521    | 0.035100636 |
| 12         | rs7308066     | 0.0501792 | 0.0745225    | 0.035100636 |
| 16         | rs2192859     | 0.354839  | 0.401804     | 0.035100636 |
| 17         | rs203090      | 0.22482   | 0.267985     | 0.035100636 |
| 17         | rs1012249     | 0.0341727 | 0.055764     | 0.035100636 |
| 1          | rs1241181     | 0.0609319 | 0.088015     | 0.035120024 |
| 3          | rs6443661     | 0.264388  | 0.224285     | 0.035120024 |
| 6          | rs4896331     | 0.0448029 | 0.069312     | 0.035120024 |
| 12         | rs1807989     | 0.256318  | 0.300613     | 0.035120024 |
| 18         | SNP_A-2059249 | 0.147482  | 0.18456      | 0.035120024 |

Table DS2: All SNPs tested for association (RDC SABP vs. controls) with the Cochran-Armitage trend test and significant at the p=0.05 threshold.

| chromosome | SNP        | MAF_cases | MAF_controls | p_value     |
|------------|------------|-----------|--------------|-------------|
| 20         | rs564744   | 0.333333  | 0.38         | 0.035120024 |
| 2          | rs2655450  | 0.365591  | 0.320906     | 0.035139423 |
| 6          | rs1265290  | 0.539427  | 0.49147      | 0.035139423 |
| 8          | rs11784248 | 0.537634  | 0.489441     | 0.035139423 |
| 16         | rs11075661 | 0.447842  | 0.400852     | 0.035139423 |
| 21         | rs1892728  | 0.215054  | 0.256982     | 0.035139423 |
| 4          | rs11735670 | 0.173835  | 0.213313     | 0.035158833 |
| 9          | rs10757743 | 0.334532  | 0.291098     | 0.035158833 |
| 12         | rs10783194 | 0.191756  | 0.232015     | 0.035158833 |
| 19         | rs11669301 | 0.311151  | 0.356631     | 0.035158833 |
| 1          | rs12134611 | 0.115108  | 0.0874233    | 0.035178254 |
| 2          | rs2460405  | 0.316547  | 0.362521     | 0.035178254 |
| 9          | rs4977233  | 0.451613  | 0.499319     | 0.035178254 |
| 4          | rs9996286  | 0.319495  | 0.366473     | 0.035197687 |
| 6          | rs513776   | 0.52509   | 0.476839     | 0.035197687 |
| 6          | rs9458064  | 0.351254  | 0.398091     | 0.035197687 |
| 7          | rs2299394  | 0.123656  | 0.158611     | 0.035197687 |
| 10         | rs16933842 | 0.0773381 | 0.106485     | 0.035197687 |
| 17         | rs7215959  | 0.0448029 | 0.0682669    | 0.035197687 |
| 2          | rs7590342  | 0.526882  | 0.478498     | 0.035217131 |
| 6          | rs4490696  | 0.301075  | 0.346981     | 0.035217131 |
| 21         | rs1892729  | 0.215054  | 0.256899     | 0.035217131 |
| 2          | rs722889   | 0.103943  | 0.0779442    | 0.035236586 |
| 6          | rs6934927  | 0.4319    | 0.479911     | 0.035236586 |
| 7          | rs819456   | 0.428315  | 0.476336     | 0.035236586 |
| 7          | rs10269665 | 0.408602  | 0.362521     | 0.035236586 |
| 18         | rs2612341  | 0.160072  | 0.127982     | 0.035236586 |
| 7          | rs842435   | 0.140288  | 0.109556     | 0.035256052 |
| 12         | rs2655888  | 0.514337  | 0.466451     | 0.035256052 |
| 13         | rs1331535  | 0.149281  | 0.118148     | 0.035256052 |
| 13         | rs4578513  | 0.188172  | 0.153152     | 0.035256052 |
| 15         | rs939626   | 0.429603  | 0.477838     | 0.035256052 |
| 1          | rs697260   | 0.102151  | 0.134517     | 0.03527553  |
| 2          | rs426590   | 0.308244  | 0.265407     | 0.03527553  |
| 6          | rs9381594  | 0.396057  | 0.350358     | 0.03527553  |
| 17         | rs2429431  | 0.52509   | 0.477358     | 0.03527553  |
| 18         | rs12954315 | 0.154122  | 0.122105     | 0.03527553  |
| 20         | rs1474734  | 0.270609  | 0.230402     | 0.03527553  |
| 1          | rs2311336  | 0.37276   | 0.327028     | 0.035295018 |
| 1          | rs2744741  | 0.34767   | 0.394746     | 0.035295018 |
| 3          | rs2717319  | 0.0645161 | 0.0924098    | 0.035295018 |
| 4          | rs17330649 | 0.299283  | 0.344569     | 0.035295018 |
| 6          | rs6922518  | 0.372302  | 0.419993     | 0.035295018 |
| 3          | rs301542   | 0.308244  | 0.354103     | 0.035314518 |
| 7          | rs3807806  | 0.453237  | 0.405567     | 0.035314518 |
| 1          | rs12563264 | 0.336918  | 0.383986     | 0.03533403  |
| 2          | rs12470949 | 0.247312  | 0.290361     | 0.03533403  |
| 3          | rs2553419  | 0.543011  | 0.494888     | 0.03533403  |
| 8          | rs2624100  | 0.0752688 | 0.104394     | 0.03533403  |
| 2          | rs1405646  | 0.426523  | 0.379598     | 0.035353552 |
| 3          | rs6769283  | 0.266187  | 0.310926     | 0.035353552 |
| 3          | rs11708123 | 0.252688  | 0.213092     | 0.035353552 |

Table DS2: All SNPs tested for association (RDC SABP vs. controls) with the Cochran-Armitage trend test and significant at the p=0.05 threshold.

| chromosome | SNP        | MAF_cases | MAF_controls | p_value     |
|------------|------------|-----------|--------------|-------------|
| 4          | rs4697381  | 0.21223   | 0.175666     | 0.035353552 |
| 12         | rs12306748 | 0.150538  | 0.119072     | 0.035353552 |
| 17         | rs755424   | 0.217626  | 0.259884     | 0.035353552 |
| 21         | rs2838445  | 0.482014  | 0.434412     | 0.035353552 |
| 1          | rs897635   | 0.283394  | 0.241621     | 0.035373086 |
| 1          | rs12408952 | 0.19964   | 0.24045      | 0.035373086 |
| 1          | rs622239   | 0.362007  | 0.409727     | 0.035373086 |
| 7          | rs2216951  | 0.353047  | 0.399625     | 0.035373086 |
| 9          | rs9299104  | 0.206093  | 0.170133     | 0.035373086 |
| 11         | rs1945110  | 0.327338  | 0.283498     | 0.035373086 |
| 15         | rs4547312  | 0.272401  | 0.316229     | 0.035373086 |
| 1          | rs6672561  | 0.266187  | 0.226158     | 0.035392631 |
| 2          | rs12693803 | 0.142086  | 0.111718     | 0.035392631 |
| 11         | rs661889   | 0.255396  | 0.215626     | 0.035392631 |
| 12         | rs6487044  | 0.464158  | 0.417151     | 0.035392631 |
| 2          | rs381214   | 0.318996  | 0.364985     | 0.035412188 |
| 2          | rs17430926 | 0.046595  | 0.0711368    | 0.035412188 |
| 2          | rs12713899 | 0.412186  | 0.36528      | 0.035412188 |
| 6          | rs9343640  | 0.191756  | 0.156559     | 0.035412188 |
| 13         | rs7334289  | 0.123656  | 0.158441     | 0.035412188 |
| 6          | rs6914153  | 0.327338  | 0.373765     | 0.035431755 |
| 10         | rs708436   | 0.0359712 | 0.0577907    | 0.035431755 |
| 20         | rs6108021  | 0.505376  | 0.458475     | 0.035431755 |
| 7          | rs989495   | 0.163669  | 0.131094     | 0.035451334 |
| 11         | rs655941   | 0.125448  | 0.0966973    | 0.035451334 |
| 16         | rs1641024  | 0.215054  | 0.256817     | 0.035451334 |
| 21         | rs1892730  | 0.213262  | 0.255029     | 0.035451334 |
| 1          | rs4916041  | 0.390681  | 0.437692     | 0.035470925 |
| 18         | rs1982037  | 0.12724   | 0.162581     | 0.035470925 |
| 22         | rs4838809  | 0.272563  | 0.231869     | 0.035470925 |
| 1          | rs1123821  | 0.217626  | 0.18013      | 0.035490527 |
| 1          | rs857640   | 0.0752688 | 0.0535653    | 0.035490527 |
| 6          | rs6569867  | 0.327957  | 0.374104     | 0.035490527 |
| 8          | rs1866000  | 0.485663  | 0.437841     | 0.035490527 |
| 9          | rs10120945 | 0.102518  | 0.134969     | 0.035490527 |
| 12         | rs673173   | 0.12724   | 0.0988412    | 0.035490527 |
| 18         | rs11659988 | 0.195341  | 0.235595     | 0.035490527 |
| 1          | rs6664521  | 0.370504  | 0.418399     | 0.03551014  |
| 2          | rs2716620  | 0.366906  | 0.413711     | 0.03551014  |
| 4          | rs17252142 | 0.242806  | 0.286176     | 0.03551014  |
| 11         | rs11222433 | 0.0734767 | 0.0518064    | 0.03551014  |
| 2          | rs6432276  | 0.33871   | 0.295331     | 0.035529764 |
| 5          | rs32571    | 0.410394  | 0.458234     | 0.035529764 |
| 7          | rs3857819  | 0.0949821 | 0.127006     | 0.035529764 |
| 9          | rs4979454  | 0.413978  | 0.367838     | 0.035529764 |
| 12         | rs4760229  | 0.311828  | 0.3578       | 0.035529764 |
| 1          | rs7531635  | 0.311828  | 0.269008     | 0.0355494   |
| 3          | rs6797926  | 0.241935  | 0.285179     | 0.0355494   |
| 5          | rs1847046  | 0.270609  | 0.315547     | 0.0355494   |
| 7          | rs7800719  | 0.295699  | 0.341451     | 0.0355494   |
| 7          | rs2471189  | 0.537634  | 0.489952     | 0.0355494   |
| 8          | rs13250548 | 0.182796  | 0.148603     | 0.0355494   |



Table DS2 All SNPs tested for association (RDC SABP vs. controls) with the Cochran-Armitage trend test and significant at the p=0.05 threshold.

| chromosome | SNP           | MAF_cases | MAF_controls | p_value     |
|------------|---------------|-----------|--------------|-------------|
| 17         | rs2060313     | 0.277778  | 0.236546     | 0.0355494   |
| 20         | rs4814204     | 0.277778  | 0.237317     | 0.0355494   |
| 2          | rs1546725     | 0.304659  | 0.262287     | 0.035569047 |
| 5          | rs2929726     | 0.471223  | 0.423195     | 0.035569047 |
| 7          | rs11978799    | 0.204301  | 0.167802     | 0.035569047 |
| 8          | rs989329      | 0.315412  | 0.272091     | 0.035569047 |
| 13         | rs470150      | 0.0448029 | 0.0688418    | 0.035569047 |
| 14         | rs2303345     | 0.307554  | 0.353302     | 0.035569047 |
| 3          | rs6788905     | 0.134409  | 0.104465     | 0.035588705 |
| 5          | rs6894271     | 0.19964   | 0.163884     | 0.035588705 |
| 6          | rs844584      | 0.30036   | 0.346639     | 0.035588705 |
| 6          | rs9784885     | 0.272563  | 0.317144     | 0.035608375 |
| 6          | rs526847      | 0.360215  | 0.407123     | 0.035608375 |
| 12         | rs4766613     | 0.213262  | 0.176441     | 0.035608375 |
| 20         | rs978217      | 0.530576  | 0.483305     | 0.035608375 |
| 3          | rs13061773    | 0.496416  | 0.449523     | 0.035628056 |
| 6          | rs9387246     | 0.324373  | 0.281239     | 0.035628056 |
| 7          | SNP_A-1949809 | 0.157706  | 0.125298     | 0.035628056 |
| 20         | rs6088387     | 0.0376344 | 0.0605854    | 0.035628056 |
| 2          | rs6718816     | 0.148746  | 0.18569      | 0.035647749 |
| 7          | rs281915      | 0.369176  | 0.32391      | 0.035647749 |
| 10         | rs2961608     | 0.21223   | 0.175427     | 0.035647749 |
| 13         | rs9534767     | 0.438849  | 0.487066     | 0.035647749 |
| 3          | rs1837893     | 0.404676  | 0.452162     | 0.035667453 |
| 9          | rs10761245    | 0.455197  | 0.503415     | 0.035667453 |
| 13         | rs9566810     | 0.320789  | 0.277797     | 0.035667453 |
| 14         | rs10083524    | 0.135379  | 0.170823     | 0.035667453 |
| 20         | rs1884328     | 0.329137  | 0.375128     | 0.035667453 |
| 22         | rs6003184     | 0.4319    | 0.480055     | 0.035667453 |
| 6          | rs469291      | 0.436823  | 0.484823     | 0.035687168 |
| 6          | rs727981      | 0.207885  | 0.171726     | 0.035687168 |
| 7          | rs4722897     | 0.516129  | 0.468654     | 0.035687168 |
| 14         | rs1890723     | 0.188849  | 0.153545     | 0.035687168 |
| 2          | rs6752522     | 0.164875  | 0.132433     | 0.035706895 |
| 2          | rs17740667    | 0.283154  | 0.327944     | 0.035706895 |
| 3          | rs1675947     | 0.37276   | 0.32805      | 0.035706895 |
| 5          | rs9637916     | 0.184588  | 0.149864     | 0.035706895 |
| 6          | rs6915338     | 0.378136  | 0.424991     | 0.035706895 |
| 9          | rs2809247     | 0.386691  | 0.341281     | 0.035706895 |
| 1          | rs610329      | 0.362007  | 0.409649     | 0.035726633 |
| 2          | rs1947892     | 0.292115  | 0.250853     | 0.035726633 |
| 4          | rs17537141    | 0.124549  | 0.159401     | 0.035726633 |
| 6          | rs7774336     | 0.435484  | 0.388586     | 0.035726633 |
| 20         | rs4812435     | 0.296763  | 0.342356     | 0.035726633 |
| 1          | rs10465868    | 0.449821  | 0.498296     | 0.035746382 |
| 3          | rs1401404     | 0.277778  | 0.321855     | 0.035746382 |
| 3          | rs1125190     | 0.155914  | 0.124149     | 0.035746382 |
| 4          | rs4697378     | 0.214029  | 0.177342     | 0.035746382 |
| 6          | rs4840097     | 0.358423  | 0.313565     | 0.035746382 |
| 8          | rs924765      | 0.417563  | 0.46493      | 0.035746382 |
| 16         | rs17494512    | 0.150538  | 0.187841     | 0.035746382 |
| 17         | rs2380173     | 0.402878  | 0.451311     | 0.035746382 |

Table DS2 All SNPs tested for association (RDC SABP vs. controls) with the Cochran-Armitage trend test and significant at the p=0.05 threshold.

| chromosome | SNP           | MAF_cases | MAF_controls | p_value     |
|------------|---------------|-----------|--------------|-------------|
| 21         | rs2823178     | 0.424731  | 0.473236     | 0.035746382 |
| 1          | rs16852409    | 0.100358  | 0.132063     | 0.035766143 |
| 3          | rs7609618     | 0.122302  | 0.0938351    | 0.035766143 |
| 4          | rs13129156    | 0.376344  | 0.423339     | 0.035766143 |
| 5          | SNP_A-2311164 | 0.0985663 | 0.0733288    | 0.035766143 |
| 6          | rs1416471     | 0.163082  | 0.13068      | 0.035766143 |
| 7          | rs2016555     | 0.376344  | 0.423339     | 0.035766143 |
| 10         | rs10824779    | 0.362007  | 0.408657     | 0.035766143 |
| 15         | rs10163001    | 0.375899  | 0.330607     | 0.035766143 |
| 2          | rs12710732    | 0.343636  | 0.390348     | 0.035785916 |
| 4          | rs13132431    | 0.331541  | 0.378024     | 0.035785916 |
| 10         | rs7921833     | 0.182796  | 0.222941     | 0.035785916 |
| 10         | rs2488291     | 0.0806452 | 0.110542     | 0.035785916 |
| 15         | rs10520056    | 0.123656  | 0.0954329    | 0.035785916 |
| 2          | rs10928461    | 0.175627  | 0.14186      | 0.0358057   |
| 3          | rs4514994     | 0.292115  | 0.338045     | 0.0358057   |
| 4          | rs1587560     | 0.469534  | 0.42254      | 0.0358057   |
| 6          | rs954753      | 0.280576  | 0.239175     | 0.0358057   |
| 7          | rs10226228    | 0.329137  | 0.375426     | 0.0358057   |
| 10         | rs11254913    | 0.361511  | 0.408564     | 0.0358057   |
| 11         | rs7939628     | 0.296763  | 0.255026     | 0.0358057   |
| 12         | rs11175627    | 0.0878136 | 0.0637572    | 0.0358057   |
| 20         | rs2092467     | 0.298561  | 0.256729     | 0.0358057   |
| 1          | rs2139876     | 0.295699  | 0.341513     | 0.035825495 |
| 2          | rs10209881    | 0.455197  | 0.408549     | 0.035825495 |
| 9          | rs7864448     | 0.301075  | 0.258703     | 0.035825495 |
| 18         | rs1865555     | 0.322581  | 0.279462     | 0.035825495 |
| 2          | rs12713983    | 0.345324  | 0.39186      | 0.035845302 |
| 2          | rs4075133     | 0.272401  | 0.31699      | 0.035845302 |
| 6          | rs9345908     | 0.357401  | 0.404567     | 0.035845302 |
| 6          | rs9364756     | 0.251799  | 0.296075     | 0.035845302 |
| 8          | rs2036547     | 0.444444  | 0.491658     | 0.035845302 |
| 12         | rs10878733    | 0.131295  | 0.102319     | 0.035845302 |
| 3          | rs17254751    | 0.057554  | 0.0835887    | 0.03586512  |
| 6          | rs9381096     | 0.266187  | 0.225861     | 0.03586512  |
| 6          | rs1928461     | 0.271583  | 0.230429     | 0.03586512  |
| 10         | rs7068595     | 0.327957  | 0.284474     | 0.03588495  |
| 13         | rs9554573     | 0.249104  | 0.293356     | 0.03588495  |
| 6          | rs7768436     | 0.0394265 | 0.0620089    | 0.035904791 |
| 6          | rs3966737     | 0.38172   | 0.336797     | 0.035904791 |
| 13         | rs2260218     | 0.134892  | 0.105084     | 0.035904791 |
| 19         | rs2317031     | 0.139785  | 0.109332     | 0.035904791 |
| 2          | rs7581045     | 0.247312  | 0.290559     | 0.035924644 |
| 6          | rs4959525     | 0.401434  | 0.355461     | 0.035924644 |
| 10         | rs4748704     | 0.12724   | 0.0985364    | 0.035924644 |
| 13         | rs9566655     | 0.217626  | 0.180518     | 0.035924644 |
| 18         | rs10153423    | 0.270609  | 0.315288     | 0.035924644 |
| 3          | rs7631197     | 0.148746  | 0.185627     | 0.035944508 |
| 5          | rs17441789    | 0.136201  | 0.106557     | 0.035944508 |
| 7          | rs36862       | 0.226619  | 0.189014     | 0.035944508 |
| 8          | rs16904563    | 0.133574  | 0.103654     | 0.035944508 |
| 20         | rs1125525     | 0.22482   | 0.187096     | 0.035944508 |

Table DS2 All SNPs tested for association (RDC SABP vs. controls) with the Cochran-Armitage trend test and significant at the p=0.05 threshold.

| chromosome | SNP        | MAF_cases | MAF_controls | p_value     |
|------------|------------|-----------|--------------|-------------|
| 2          | rs12468338 | 0.0935252 | 0.0690184    | 0.035964383 |
| 2          | rs4674086  | 0.514388  | 0.466451     | 0.035964383 |
| 10         | rs10508633 | 0.0956679 | 0.128153     | 0.035964383 |
| 20         | rs2769856  | 0.24552   | 0.206644     | 0.035964383 |
| 21         | rs2829412  | 0.215054  | 0.256725     | 0.035964383 |
| 22         | rs2071896  | 0.114695  | 0.0874829    | 0.035964383 |
| 1          | rs17448778 | 0.306859  | 0.263813     | 0.03598427  |
| 1          | rs6662273  | 0.305755  | 0.351744     | 0.03598427  |
| 1          | rs6695410  | 0.141577  | 0.11096      | 0.03598427  |
| 7          | rs4947478  | 0.53405   | 0.48686      | 0.03598427  |
| 8          | rs534523   | 0.492806  | 0.444842     | 0.03598427  |
| 12         | rs16914767 | 0.0359712 | 0.0577907    | 0.03598427  |
| 1          | rs17391542 | 0.138489  | 0.107933     | 0.036004169 |
| 5          | rs17696019 | 0.16426   | 0.131606     | 0.036004169 |
| 8          | rs7461567  | 0.265233  | 0.310116     | 0.036004169 |
| 15         | rs10851648 | 0.134409  | 0.169737     | 0.036004169 |
| 1          | rs12121881 | 0.318996  | 0.275639     | 0.036024079 |
| 7          | rs6947830  | 0.503584  | 0.456344     | 0.036024079 |
| 9          | rs7043510  | 0.259857  | 0.219782     | 0.036024079 |
| 12         | rs2037153  | 0.188172  | 0.153636     | 0.036024079 |
| 1          | rs12035637 | 0.15233   | 0.189033     | 0.036044001 |
| 2          | rs13023213 | 0.214029  | 0.25596      | 0.036044001 |
| 6          | rs1413809  | 0.523466  | 0.475264     | 0.036044001 |
| 9          | rs830406   | 0.433692  | 0.386712     | 0.036044001 |
| 11         | rs10832163 | 0.334532  | 0.380539     | 0.036044001 |
| 21         | rs2838738  | 0.415468  | 0.462679     | 0.036044001 |
| 4          | rs3128768  | 0.185252  | 0.150937     | 0.036063934 |
| 11         | rs11234643 | 0.0716846 | 0.100307     | 0.036063934 |
| 13         | rs7331418  | 0.535842  | 0.487236     | 0.036063934 |
| 13         | rs10507521 | 0.203971  | 0.167802     | 0.036063934 |
| 16         | rs2679290  | 0.354839  | 0.402044     | 0.036063934 |
| 21         | rs986917   | 0.539427  | 0.491658     | 0.036063934 |
| 1          | rs11805709 | 0.299283  | 0.257834     | 0.036083879 |
| 2          | rs4233600  | 0.209677  | 0.251451     | 0.036083879 |
| 17         | rs4924803  | 0.383513  | 0.431276     | 0.036083879 |
| 20         | rs2327258  | 0.0503597 | 0.0754171    | 0.036083879 |
| 2          | rs818188   | 0.336918  | 0.382543     | 0.036103835 |
| 7          | rs4731173  | 0.235612  | 0.19744      | 0.036103835 |
| 14         | rs1950296  | 0.103943  | 0.0780504    | 0.036103835 |
| 19         | rs11085158 | 0.311828  | 0.356997     | 0.036103835 |
| 7          | rs12537490 | 0.410394  | 0.457893     | 0.036123803 |
| 10         | rs7915486  | 0.385305  | 0.340436     | 0.036123803 |
| 13         | rs9543226  | 0.415468  | 0.368735     | 0.036123803 |
| 14         | rs17429024 | 0.102151  | 0.0766088    | 0.036123803 |
| 4          | rs1383519  | 0.0967742 | 0.128236     | 0.036143782 |
| 8          | rs12680149 | 0.394265  | 0.348774     | 0.036143782 |
| 9          | rs7869594  | 0.476703  | 0.429642     | 0.036143782 |
| 15         | rs11072031 | 0.111111  | 0.0846678    | 0.036143782 |
| 18         | rs9948030  | 0.259857  | 0.303778     | 0.036143782 |
| 20         | rs531133   | 0.460573  | 0.413511     | 0.036143782 |
| 2          | rs1365943  | 0.467742  | 0.420048     | 0.036163773 |
| 2          | rs12465726 | 0.283154  | 0.327821     | 0.036163773 |

Table DS2: All SNPs tested for association (RDC SABP vs. controls) with the Cochran-Armitage trend test and significant at the p=0.05 threshold.

| chromosome | SNP           | MAF_cases | MAF_controls | p_value     |
|------------|---------------|-----------|--------------|-------------|
| 4          | rs4440231     | 0.235612  | 0.197651     | 0.036163773 |
| 5          | rs566750      | 0.31362   | 0.359407     | 0.036163773 |
| 5          | rs10516086    | 0.129032  | 0.100204     | 0.036163773 |
| 2          | rs1915752     | 0.311151  | 0.268089     | 0.036183776 |
| 3          | rs4685910     | 0.388889  | 0.436627     | 0.036183776 |
| 5          | rs10942943    | 0.326165  | 0.282668     | 0.036183776 |
| 6          | rs387965      | 0.494624  | 0.447736     | 0.036183776 |
| 8          | SNP_A-4197819 | 0.0863309 | 0.0627344    | 0.036183776 |
| 8          | rs7000601     | 0.150538  | 0.11951      | 0.036183776 |
| 10         | rs12775397    | 0.332734  | 0.288711     | 0.036183776 |
| 19         | rs4805315     | 0.327957  | 0.284571     | 0.036183776 |
| 1          | rs10458360    | 0.492806  | 0.445145     | 0.03620379  |
| 1          | rs1494898     | 0.375899  | 0.330439     | 0.03620379  |
| 2          | rs7561809     | 0.0358423 | 0.0576398    | 0.03620379  |
| 11         | rs1714345     | 0.318996  | 0.364906     | 0.03620379  |
| 12         | rs10507086    | 0.345878  | 0.30116      | 0.03620379  |
| 16         | rs8043939     | 0.188172  | 0.153204     | 0.03620379  |
| 1          | rs1434285     | 0.236559  | 0.198534     | 0.036223816 |
| 2          | rs17776629    | 0.200717  | 0.241826     | 0.036223816 |
| 2          | rs1344766     | 0.188172  | 0.227939     | 0.036223816 |
| 5          | rs296941      | 0.213262  | 0.176601     | 0.036223816 |
| 10         | rs276215      | 0.268817  | 0.312863     | 0.036223816 |
| 4          | rs17198799    | 0.299283  | 0.257663     | 0.036243853 |
| 7          | rs6952949     | 0.378136  | 0.425009     | 0.036243853 |
| 7          | rs1852090     | 0.0752688 | 0.0535836    | 0.036243853 |
| 8          | rs16882596    | 0.142599  | 0.179605     | 0.036243853 |
| 16         | rs1948575     | 0.336918  | 0.383316     | 0.036243853 |
| 18         | rs459799      | 0.183453  | 0.149129     | 0.036243853 |
| 5          | rs250237      | 0.177419  | 0.143514     | 0.036263902 |
| 5          | rs2115251     | 0.134409  | 0.169843     | 0.036263902 |
| 16         | rs7404932     | 0.510791  | 0.463386     | 0.036263902 |
| 2          | rs2018314     | 0.166667  | 0.205381     | 0.036283962 |
| 9          | rs905362      | 0.277778  | 0.322256     | 0.036283962 |
| 12         | rs2214956     | 0.0848375 | 0.0616251    | 0.036283962 |
| 15         | rs7161780     | 0.124101  | 0.0959114    | 0.036283962 |
| 18         | rs724881      | 0.0561594 | 0.0822268    | 0.036283962 |
| 1          | rs1418096     | 0.0827338 | 0.0594549    | 0.036304034 |
| 1          | rs12751531    | 0.136691  | 0.172572     | 0.036304034 |
| 1          | rs10736380    | 0.136691  | 0.172566     | 0.036304034 |
| 2          | rs10176914    | 0.353047  | 0.308663     | 0.036304034 |
| 3          | rs2305621     | 0.225806  | 0.268575     | 0.036304034 |
| 6          | rs9320609     | 0.408602  | 0.456544     | 0.036304034 |
| 8          | rs4840426     | 0.386691  | 0.341072     | 0.036304034 |
| 10         | rs12763142    | 0.203237  | 0.244206     | 0.036304034 |
| 12         | rs3741628     | 0.388889  | 0.436478     | 0.036304034 |
| 1          | rs11165297    | 0.156475  | 0.194142     | 0.036324118 |
| 1          | rs12037440    | 0.09319   | 0.0688011    | 0.036324118 |
| 2          | rs4662668     | 0.177419  | 0.217087     | 0.036324118 |
| 3          | rs13433815    | 0.193548  | 0.158083     | 0.036324118 |
| 3          | rs1850963     | 0.383513  | 0.43013      | 0.036324118 |
| 4          | rs6842809     | 0.275986  | 0.32032      | 0.036324118 |
| 4          | rs17042469    | 0.448029  | 0.496082     | 0.036324118 |

Table DS2: All SNPs tested for association (RDC SABP vs. controls) with the Cochran-Armitage trend test and significant at the p=0.05 threshold.

| chromosome | SNP           | MAF_cases | MAF_controls | p_value     |
|------------|---------------|-----------|--------------|-------------|
| 5          | rs10519528    | 0.0842294 | 0.114612     | 0.036324118 |
| 8          | SNP_A-2135579 | 0.301075  | 0.346337     | 0.036324118 |
| 15         | rs534825      | 0.177419  | 0.143684     | 0.036324118 |
| 15         | rs2651764     | 0.0663082 | 0.0935583    | 0.036324118 |
| 16         | rs8062600     | 0.444444  | 0.397851     | 0.036324118 |
| 17         | rs7209915     | 0.430108  | 0.382584     | 0.036324118 |
| 1          | rs562234      | 0.456835  | 0.410331     | 0.036344214 |
| 3          | rs17525168    | 0.213262  | 0.176661     | 0.036344214 |
| 4          | rs12505522    | 0.269784  | 0.229053     | 0.036344214 |
| 8          | rs7000702     | 0.159498  | 0.127428     | 0.036344214 |
| 2          | rs16863126    | 0.0609319 | 0.0880546    | 0.036364321 |
| 4          | rs1369795     | 0.417563  | 0.46487      | 0.036364321 |
| 6          | rs9384524     | 0.149281  | 0.186201     | 0.036364321 |
| 8          | rs920047      | 0.453237  | 0.501364     | 0.036364321 |
| 8          | rs1034511     | 0.473118  | 0.425281     | 0.036364321 |
| 13         | rs1412973     | 0.489247  | 0.441508     | 0.036364321 |
| 14         | rs4901909     | 0.439068  | 0.392444     | 0.036364321 |
| 19         | rs12459205    | 0.469534  | 0.422566     | 0.036364321 |
| 6          | rs2252933     | 0.120072  | 0.154567     | 0.036384439 |
| 11         | rs7928348     | 0.378136  | 0.425724     | 0.036384439 |
| 13         | rs3118814     | 0.460573  | 0.413828     | 0.036384439 |
| 16         | rs1478705     | 0.383513  | 0.337875     | 0.036384439 |
| 17         | rs2628165     | 0.52518   | 0.47718      | 0.036384439 |
| 19         | rs10423964    | 0.231183  | 0.273704     | 0.036384439 |
| 6          | rs1512449     | 0.32852   | 0.374829     | 0.03640457  |
| 9          | rs10992511    | 0.046595  | 0.0707226    | 0.03640457  |
| 10         | rs7920191     | 0.424731  | 0.378365     | 0.03640457  |
| 11         | rs11023727    | 0.521505  | 0.47372      | 0.03640457  |
| 13         | rs9544029     | 0.333333  | 0.379775     | 0.03640457  |
| 17         | rs3612        | 0.168459  | 0.207196     | 0.03640457  |
| 2          | rs7566610     | 0.205036  | 0.168426     | 0.036424712 |
| 4          | rs2567372     | 0.327957  | 0.373553     | 0.036424712 |
| 4          | rs2070949     | 0.512545  | 0.464918     | 0.036424712 |
| 11         | rs10832696    | 0.150538  | 0.119113     | 0.036424712 |
| 12         | rs11836039    | 0.311151  | 0.268903     | 0.036424712 |
| 13         | rs9594819     | 0.362007  | 0.317252     | 0.036424712 |
| 16         | rs7195999     | 0.464158  | 0.416752     | 0.036424712 |
| 17         | rs8078929     | 0.0902527 | 0.121207     | 0.036424712 |
| 2          | rs7594864     | 0.38172   | 0.429083     | 0.036444865 |
| 3          | rs2220011     | 0.442652  | 0.490126     | 0.036444865 |
| 4          | rs7661192     | 0.210432  | 0.252215     | 0.036444865 |
| 10         | rs1492184     | 0.188849  | 0.154108     | 0.036444865 |
| 16         | rs4781472     | 0.115108  | 0.0880643    | 0.036444865 |
| 16         | rs11074555    | 0.201439  | 0.242409     | 0.036444865 |
| 16         | rs12149466    | 0.528777  | 0.481437     | 0.036444865 |
| 17         | rs16942330    | 0.246403  | 0.207014     | 0.036444865 |
| 1          | rs17423764    | 0.163082  | 0.130717     | 0.036465031 |
| 2          | rs16830676    | 0.0413669 | 0.0648243    | 0.036465031 |
| 7          | rs9656688     | 0.109319  | 0.142541     | 0.036465031 |
| 9          | rs6479389     | 0.422662  | 0.376617     | 0.036465031 |
| 11         | rs11042192    | 0.177419  | 0.217228     | 0.036465031 |
| 11         | rs2156528     | 0.270609  | 0.229891     | 0.036465031 |

Table DS2: All SNPs tested for association (RDC SABP vs. controls) with the Cochran-Armitage trend test and significant at the p=0.05 threshold.

| chromosome | SNP        | MAF_cases | MAF_controls | p_value     |
|------------|------------|-----------|--------------|-------------|
| 12         | rs2056075  | 0.369176  | 0.416184     | 0.036465031 |
| 12         | rs11060283 | 0.0340502 | 0.0553851    | 0.036465031 |
| 14         | rs881970   | 0.0539568 | 0.0792164    | 0.036465031 |
| 1          | rs7521322  | 0.34296   | 0.389325     | 0.036485208 |
| 6          | rs1080708  | 0.329749  | 0.375851     | 0.036485208 |
| 6          | rs2143164  | 0.0448029 | 0.0690419    | 0.036485208 |
| 7          | rs673472   | 0.303249  | 0.260832     | 0.036485208 |
| 8          | rs7007897  | 0.206093  | 0.169734     | 0.036485208 |
| 10         | rs10886925 | 0.356115  | 0.402962     | 0.036485208 |
| 16         | rs4784207  | 0.433453  | 0.481058     | 0.036485208 |
| 17         | rs1382047  | 0.42446   | 0.472222     | 0.036485208 |
| 20         | rs6028110  | 0.207885  | 0.249234     | 0.036485208 |
| 1          | rs4317857  | 0.120072  | 0.0921816    | 0.036505396 |
| 11         | rs7952482  | 0.16787   | 0.206485     | 0.036505396 |
| 11         | rs4129253  | 0.120504  | 0.0925358    | 0.036505396 |
| 12         | rs10875861 | 0.369176  | 0.416326     | 0.036505396 |
| 12         | rs12300992 | 0.102151  | 0.134937     | 0.036505396 |
| 20         | rs1555468  | 0.250896  | 0.211683     | 0.036505396 |
| 21         | rs2155965  | 0.235612  | 0.196721     | 0.036505396 |
| 2          | rs13018589 | 0.205036  | 0.16871      | 0.036525597 |
| 4          | rs9884193  | 0.192446  | 0.231911     | 0.036525597 |
| 4          | rs3101267  | 0.258065  | 0.301328     | 0.036525597 |
| 8          | rs10503528 | 0.0949821 | 0.126235     | 0.036525597 |
| 8          | rs4873211  | 0.295699  | 0.340483     | 0.036525597 |
| 11         | rs11224686 | 0.0430108 | 0.066337     | 0.036525597 |
| 13         | rs9317076  | 0.157706  | 0.195608     | 0.036525597 |
| 1          | rs2268809  | 0.302158  | 0.259966     | 0.036545809 |
| 1          | rs12096645 | 0.348375  | 0.394647     | 0.036545809 |
| 2          | rs2241113  | 0.299283  | 0.344857     | 0.036545809 |
| 6          | rs12194972 | 0.396057  | 0.350647     | 0.036545809 |
| 7          | rs10954212 | 0.517921  | 0.469997     | 0.036545809 |
| 8          | rs2584372  | 0.243728  | 0.286882     | 0.036545809 |
| 10         | rs11009370 | 0.323741  | 0.369417     | 0.036545809 |
| 15         | rs970374   | 0.106115  | 0.0798162    | 0.036545809 |
| 2          | rs5009910  | 0.455197  | 0.40875      | 0.036566032 |
| 7          | rs2023687  | 0.18638   | 0.225647     | 0.036566032 |
| 7          | rs3793177  | 0.417266  | 0.371166     | 0.036566032 |
| 8          | rs11995628 | 0.303957  | 0.262133     | 0.036566032 |
| 11         | rs567300   | 0.283154  | 0.327316     | 0.036566032 |
| 11         | rs1371332  | 0.357914  | 0.405014     | 0.036566032 |
| 12         | rs1700369  | 0.0322581 | 0.0534559    | 0.036566032 |
| 14         | rs1571379  | 0.208633  | 0.17229      | 0.036566032 |
| 3          | rs1017296  | 0.222222  | 0.185053     | 0.036586268 |
| 4          | rs10027450 | 0.134409  | 0.104822     | 0.036586268 |
| 5          | rs6450207  | 0.0701439 | 0.0979557    | 0.036586268 |
| 6          | rs6940739  | 0.148746  | 0.185456     | 0.036586268 |
| 6          | rs3805766  | 0.0956679 | 0.070893     | 0.036586268 |
| 9          | rs7859543  | 0.262681  | 0.222733     | 0.036586268 |
| 11         | rs11233462 | 0.181004  | 0.146848     | 0.036586268 |
| 4          | rs13152150 | 0.154122  | 0.191207     | 0.036606515 |
| 5          | rs1644047  | 0.469203  | 0.421635     | 0.036606515 |
| 7          | rs10241082 | 0.215054  | 0.178073     | 0.036606515 |

Table DS2: All SNPs tested for association (RDC SABP vs. controls) with the Cochran-Armitage trend test and significant at the p=0.05 threshold.

| chromosome | SNP        | MAF_cases | MAF_controls | p_value     |
|------------|------------|-----------|--------------|-------------|
| 11         | rs10501147 | 0.159498  | 0.127554     | 0.036606515 |
| 12         | rs2248343  | 0.0824373 | 0.0592643    | 0.036606515 |
| 14         | rs1022850  | 0.0985663 | 0.0732788    | 0.036606515 |
| 2          | rs332111   | 0.339928  | 0.296037     | 0.036626774 |
| 4          | rs994447   | 0.168459  | 0.135434     | 0.036626774 |
| 6          | rs9405157  | 0.179211  | 0.218399     | 0.036626774 |
| 15         | rs9920483  | 0.510753  | 0.462692     | 0.036626774 |
| 15         | rs1031900  | 0.419355  | 0.466462     | 0.036626774 |
| 17         | rs11204324 | 0.132616  | 0.168767     | 0.036626774 |
| 4          | rs1604225  | 0.272401  | 0.23179      | 0.036647045 |
| 6          | rs9478170  | 0.206093  | 0.246851     | 0.036647045 |
| 8          | rs4457339  | 0.205036  | 0.168767     | 0.036647045 |
| 11         | rs1792818  | 0.265233  | 0.224472     | 0.036647045 |
| 20         | rs2427078  | 0.0734767 | 0.101978     | 0.036647045 |
| 11         | rs10832165 | 0.335125  | 0.38096      | 0.036667327 |
| 4          | rs592349   | 0.408602  | 0.362228     | 0.036687622 |
| 6          | rs662554   | 0.236559  | 0.198294     | 0.036687622 |
| 8          | rs4921608  | 0.125899  | 0.0975111    | 0.036687622 |
| 9          | rs10967645 | 0.0701439 | 0.0983299    | 0.036687622 |
| 5          | rs2416434  | 0.202166  | 0.166383     | 0.036707928 |
| 6          | rs16900673 | 0.0985663 | 0.0736447    | 0.036707928 |
| 8          | rs17300285 | 0.521583  | 0.473926     | 0.036707928 |
| 12         | rs287031   | 0.437276  | 0.484807     | 0.036707928 |
| 13         | rs9514544  | 0.431655  | 0.384877     | 0.036707928 |
| 18         | rs7230877  | 0.188172  | 0.227613     | 0.036707928 |
| 21         | rs2834965  | 0.124101  | 0.158595     | 0.036707928 |
| 1          | rs10800668 | 0.139785  | 0.109199     | 0.036728245 |
| 4          | rs7681189  | 0.494624  | 0.446983     | 0.036728245 |
| 5          | rs2112323  | 0.145683  | 0.114782     | 0.036728245 |
| 6          | rs12660608 | 0.22043   | 0.183413     | 0.036728245 |
| 21         | rs2827523  | 0.358423  | 0.313672     | 0.036728245 |
| 1          | rs12728909 | 0.284173  | 0.328328     | 0.036748575 |
| 8          | rs4840427  | 0.321942  | 0.278574     | 0.036748575 |
| 8          | rs13251640 | 0.417563  | 0.465441     | 0.036748575 |
| 8          | rs9285025  | 0.318996  | 0.365247     | 0.036748575 |
| 8          | rs6982310  | 0.365591  | 0.320845     | 0.036748575 |
| 10         | rs2418979  | 0.0913978 | 0.122616     | 0.036748575 |
| 3          | rs11711663 | 0.415771  | 0.369632     | 0.036768916 |
| 6          | rs521036   | 0.367384  | 0.41414      | 0.036768916 |
| 11         | rs923031   | 0.521505  | 0.473783     | 0.036768916 |
| 11         | rs1532421  | 0.433692  | 0.481248     | 0.036768916 |
| 1          | rs9427444  | 0.139785  | 0.109295     | 0.036789269 |
| 3          | rs7649739  | 0.314079  | 0.360096     | 0.036789269 |
| 4          | rs16893682 | 0.0752688 | 0.0536936    | 0.036789269 |
| 4          | rs1874645  | 0.424731  | 0.378406     | 0.036789269 |
| 5          | rs10045204 | 0.0394265 | 0.061882     | 0.036789269 |
| 8          | rs10094497 | 0.485663  | 0.43816      | 0.036789269 |
| 14         | rs10134942 | 0.111511  | 0.084639     | 0.036789269 |
| 15         | rs11072994 | 0.258065  | 0.21842      | 0.036789269 |
| 18         | rs9964834  | 0.324373  | 0.281079     | 0.036789269 |
| 3          | rs9834423  | 0.170251  | 0.136984     | 0.036809634 |
| 3          | rs4894320  | 0.209677  | 0.251361     | 0.036809634 |

Table DS2: All SNPs tested for association (RDC SABP vs. controls) with the Cochran-Armitage trend test and significant at the p=0.05 threshold.

| chromosome | SNP           | MAF_cases | MAF_controls | p_value     |
|------------|---------------|-----------|--------------|-------------|
| 5          | rs16895132    | 0.318996  | 0.275868     | 0.036809634 |
| 8          | rs7833781     | 0.367384  | 0.413593     | 0.036809634 |
| 2          | rs13427179    | 0.167266  | 0.206113     | 0.036830011 |
| 6          | rs438259      | 0.327957  | 0.285495     | 0.036830011 |
| 7          | rs10951993    | 0.349462  | 0.396698     | 0.036830011 |
| 2          | rs6724718     | 0.272401  | 0.231924     | 0.036850399 |
| 5          | rs404016      | 0.155914  | 0.19312      | 0.036850399 |
| 7          | rs17135842    | 0.106498  | 0.139638     | 0.036850399 |
| 8          | rs4242425     | 0.318996  | 0.365201     | 0.036850399 |
| 8          | rs11166774    | 0.42446   | 0.378161     | 0.036850399 |
| 1          | rs12741848    | 0.0896057 | 0.120061     | 0.0368708   |
| 2          | rs17651918    | 0.130824  | 0.101943     | 0.0368708   |
| 5          | rs10471956    | 0.133094  | 0.103847     | 0.0368708   |
| 1          | rs7535253     | 0.240143  | 0.201635     | 0.036891212 |
| 1          | rs6693420     | 0.361511  | 0.408564     | 0.036891212 |
| 9          | rs10735584    | 0.0448029 | 0.0687777    | 0.036891212 |
| 10         | rs11146177    | 0.157706  | 0.195392     | 0.036891212 |
| 1          | rs11207128    | 0.266187  | 0.309898     | 0.036911636 |
| 3          | rs161199      | 0.18638   | 0.225647     | 0.036911636 |
| 5          | rs10077875    | 0.408273  | 0.455381     | 0.036911636 |
| 8          | rs2002463     | 0.0740072 | 0.10235      | 0.036911636 |
| 9          | rs902908      | 0.290323  | 0.334581     | 0.036911636 |
| 9          | rs17303101    | 0.340502  | 0.296902     | 0.036911636 |
| 9          | rs514708      | 0.301075  | 0.258938     | 0.036911636 |
| 11         | rs10840175    | 0.369176  | 0.416553     | 0.036911636 |
| 11         | rs766552      | 0.0555556 | 0.081233     | 0.036911636 |
| 14         | SNP_A-1934157 | 0.350181  | 0.306039     | 0.036911636 |
| 22         | rs16985967    | 0.0985663 | 0.0736698    | 0.036911636 |
| 6          | rs12214037    | 0.215054  | 0.178134     | 0.036932071 |
| 7          | rs4584085     | 0.121864  | 0.156218     | 0.036932071 |
| 21         | rs2826443     | 0.179211  | 0.145365     | 0.036932071 |
| 1          | rs7534464     | 0.122302  | 0.157123     | 0.036952519 |
| 2          | rs7567093     | 0.0949821 | 0.126833     | 0.036952519 |
| 6          | rs9490546     | 0.296029  | 0.254855     | 0.036952519 |
| 7          | rs6950044     | 0.365591  | 0.320684     | 0.036952519 |
| 7          | rs7797204     | 0.31362   | 0.271025     | 0.036952519 |
| 13         | SNP_A-2114354 | 0.195341  | 0.236116     | 0.036952519 |
| 16         | rs10500384    | 0.206835  | 0.170524     | 0.036952519 |
| 18         | rs216562      | 0.324373  | 0.37083      | 0.036952519 |
| 3          | rs164203      | 0.494604  | 0.446856     | 0.036972979 |
| 12         | rs7294502     | 0.255435  | 0.215995     | 0.036972979 |
| 18         | rs620780      | 0.311151  | 0.268509     | 0.036972979 |
| 1          | rs6702738     | 0.435252  | 0.483146     | 0.03699345  |
| 4          | rs6827941     | 0.326165  | 0.372699     | 0.03699345  |
| 7          | rs6955090     | 0.250896  | 0.211388     | 0.03699345  |
| 7          | rs10954357    | 0.336331  | 0.29188      | 0.03699345  |
| 10         | rs7897805     | 0.0716846 | 0.0996593    | 0.03699345  |
| 19         | rs8101636     | 0.121864  | 0.0939734    | 0.03699345  |
| 1          | rs4604663     | 0.376344  | 0.423746     | 0.037013933 |
| 2          | rs7606821     | 0.157706  | 0.126108     | 0.037013933 |
| 8          | rs2128128     | 0.392473  | 0.438991     | 0.037013933 |
| 8          | rs17088698    | 0.181004  | 0.146637     | 0.037013933 |



Table DS2: All SNPs tested for association (RDC SABP vs. controls) with the Cochran-Armitage trend test and significant at the p=0.05 threshold.

| chromosome | SNP        | MAF_cases | MAF_controls | p_value     |
|------------|------------|-----------|--------------|-------------|
| 15         | rs7181685  | 0.148746  | 0.117416     | 0.037013933 |
| 2          | rs7559666  | 0.370968  | 0.326687     | 0.037034428 |
| 2          | rs7563111  | 0.198556  | 0.238997     | 0.037034428 |
| 5          | rs7733169  | 0.27518   | 0.235073     | 0.037034428 |
| 6          | rs1413810  | 0.52509   | 0.477311     | 0.037034428 |
| 8          | rs5011597  | 0.308664  | 0.266302     | 0.037034428 |
| 12         | rs12369213 | 0.143885  | 0.112947     | 0.037034428 |
| 17         | rs10521112 | 0.332734  | 0.378969     | 0.037034428 |
| 7          | rs799964   | 0.236559  | 0.278705     | 0.037054936 |
| 2          | rs1967603  | 0.259857  | 0.220463     | 0.037075454 |
| 11         | rs638517   | 0.215827  | 0.179316     | 0.037075454 |
| 5          | rs7735912  | 0.202509  | 0.16678      | 0.037095985 |
| 11         | rs11033546 | 0.109319  | 0.0829352    | 0.037095985 |
| 11         | rs2187364  | 0.270609  | 0.230061     | 0.037095985 |
| 14         | rs2331618  | 0.530576  | 0.483077     | 0.037095985 |
| 22         | rs132883   | 0.175627  | 0.141956     | 0.037095985 |
| 1          | rs1510266  | 0.0896057 | 0.119973     | 0.037116528 |
| 2          | rs4663114  | 0.361511  | 0.316803     | 0.037116528 |
| 3          | rs1448434  | 0.449821  | 0.402939     | 0.037116528 |
| 5          | rs6896499  | 0.184588  | 0.150664     | 0.037116528 |
| 10         | rs2461215  | 0.453405  | 0.406303     | 0.037116528 |
| 12         | rs1872216  | 0.275986  | 0.235164     | 0.037116528 |
| 2          | rs6430431  | 0.148746  | 0.185349     | 0.037137083 |
| 7          | rs10252237 | 0.244604  | 0.205662     | 0.037137083 |
| 7          | rs4261     | 0.419065  | 0.46661      | 0.037137083 |
| 9          | rs7871395  | 0.234767  | 0.197001     | 0.037137083 |
| 17         | rs4925081  | 0.382671  | 0.430399     | 0.037137083 |
| 22         | rs5749468  | 0.247312  | 0.208248     | 0.037137083 |
| 3          | rs2885865  | 0.410394  | 0.364488     | 0.037157649 |
| 3          | rs9869278  | 0.0485612 | 0.0730586    | 0.037157649 |
| 4          | rs17042088 | 0.0770609 | 0.1059       | 0.037157649 |
| 6          | rs9367433  | 0.0809353 | 0.110675     | 0.037157649 |
| 10         | rs10903646 | 0.528881  | 0.480579     | 0.037157649 |
| 11         | rs497681   | 0.45471   | 0.407464     | 0.037157649 |
| 13         | rs1729770  | 0.311828  | 0.269663     | 0.037157649 |
| 15         | rs736172   | 0.200717  | 0.241062     | 0.037157649 |
| 15         | rs734495   | 0.385305  | 0.432492     | 0.037157649 |
| 17         | rs8078963  | 0.11828   | 0.151959     | 0.037157649 |
| 5          | rs6893566  | 0.258065  | 0.219101     | 0.037178228 |
| 10         | rs11003084 | 0.362007  | 0.408254     | 0.037178228 |
| 5          | rs2935639  | 0.292419  | 0.337265     | 0.037198818 |
| 7          | rs17309873 | 0.139785  | 0.175349     | 0.037198818 |
| 9          | rs7869905  | 0.388889  | 0.343846     | 0.037198818 |
| 18         | rs1893506  | 0.046595  | 0.0704057    | 0.037198818 |
| 1          | rs12086591 | 0.0842294 | 0.0612662    | 0.03721942  |
| 16         | rs9939674  | 0.302867  | 0.347663     | 0.03721942  |
| 16         | rs4090562  | 0.202509  | 0.243271     | 0.03721942  |
| 2          | rs6543592  | 0.105735  | 0.0796928    | 0.037240035 |
| 2          | rs930140   | 0.526882  | 0.47955      | 0.037240035 |
| 6          | rs7772735  | 0.196043  | 0.160812     | 0.037240035 |
| 10         | rs12764787 | 0.166667  | 0.204398     | 0.037240035 |
| 1          | rs12023014 | 0.277778  | 0.321794     | 0.037260661 |

Table DS2: All SNPs tested for association (RDC SABP vs. controls) with the Cochran-Armitage trend test and significant at the p=0.05 threshold.

| chromosome | SNP        | MAF_cases | MAF_controls | p_value     |
|------------|------------|-----------|--------------|-------------|
| 5          | rs2277046  | 0.113309  | 0.0859428    | 0.037260661 |
| 5          | rs6861890  | 0.539427  | 0.490949     | 0.037260661 |
| 11         | rs11213103 | 0.358423  | 0.405313     | 0.037260661 |
| 12         | rs11057560 | 0.243728  | 0.28698      | 0.037260661 |
| 13         | rs1933220  | 0.431655  | 0.479032     | 0.037260661 |
| 14         | rs11847592 | 0.403226  | 0.357289     | 0.037260661 |
| 20         | rs533608   | 0.53777   | 0.490123     | 0.037260661 |
| 1          | rs1749409  | 0.0483871 | 0.0725971    | 0.037281299 |
| 2          | rs2704785  | 0.294964  | 0.339462     | 0.037281299 |
| 2          | rs10207132 | 0.168459  | 0.206755     | 0.037281299 |
| 3          | rs6438523  | 0.449821  | 0.403066     | 0.037281299 |
| 4          | rs300943   | 0.408602  | 0.362428     | 0.037281299 |
| 7          | rs601899   | 0.304659  | 0.262521     | 0.037281299 |
| 9          | rs1780020  | 0.369176  | 0.324932     | 0.037281299 |
| 1          | rs2365270  | 0.276978  | 0.32099      | 0.03730195  |
| 2          | rs829573   | 0.206835  | 0.247105     | 0.03730195  |
| 3          | rs749932   | 0.415771  | 0.462377     | 0.03730195  |
| 14         | rs8018335  | 0.129032  | 0.164057     | 0.03730195  |
| 15         | rs4774941  | 0.0431655 | 0.0660988    | 0.03730195  |
| 2          | rs10931861 | 0.203237  | 0.243778     | 0.037322612 |
| 11         | rs11218067 | 0.203237  | 0.167576     | 0.037322612 |
| 14         | rs4353437  | 0.131295  | 0.166496     | 0.037322612 |
| 1          | rs2494884  | 0.0913978 | 0.122317     | 0.037343286 |
| 3          | rs6549127  | 0.215054  | 0.178949     | 0.037343286 |
| 9          | rs4744587  | 0.0448029 | 0.068848     | 0.037343286 |
| 11         | rs3886942  | 0.356631  | 0.403039     | 0.037343286 |
| 12         | rs2052291  | 0.0394265 | 0.0625213    | 0.037343286 |
| 18         | rs9955824  | 0.32554   | 0.371764     | 0.037343286 |
| 1          | rs4338323  | 0.046595  | 0.0709171    | 0.037363972 |
| 2          | rs4358156  | 0.519784  | 0.472411     | 0.037363972 |
| 2          | rs12612347 | 0.539568  | 0.491482     | 0.037363972 |
| 3          | rs9824435  | 0.145161  | 0.181834     | 0.037363972 |
| 4          | rs6551872  | 0.263441  | 0.223738     | 0.037363972 |
| 4          | rs11097814 | 0.399642  | 0.354294     | 0.037363972 |
| 4          | rs1439263  | 0.129032  | 0.164339     | 0.037363972 |
| 5          | rs7733363  | 0.473022  | 0.425579     | 0.037363972 |
| 5          | rs11134856 | 0.117329  | 0.0900547    | 0.037363972 |
| 8          | rs4501619  | 0.251799  | 0.296107     | 0.037363972 |
| 15         | rs2255663  | 0.249104  | 0.291042     | 0.037363972 |
| 4          | rs7664968  | 0.304659  | 0.262683     | 0.03738467  |
| 5          | rs795526   | 0.516129  | 0.468313     | 0.03738467  |
| 11         | rs10768703 | 0.112903  | 0.0859535    | 0.03738467  |
| 11         | rs11040408 | 0.234767  | 0.277248     | 0.03738467  |
| 11         | rs10891732 | 0.413669  | 0.460661     | 0.03738467  |
| 12         | rs11066633 | 0.232014  | 0.274259     | 0.03738467  |
| 15         | rs1431609  | 0.37276   | 0.327933     | 0.03738467  |
| 17         | rs7220509  | 0.125448  | 0.097099     | 0.03738467  |
| 2          | rs2381190  | 0.224014  | 0.266451     | 0.037405381 |
| 9          | rs12338099 | 0.0698925 | 0.0978854    | 0.037405381 |
| 10         | rs7100632  | 0.453405  | 0.406474     | 0.037405381 |
| 17         | rs7211094  | 0.168459  | 0.207014     | 0.037405381 |
| 20         | rs7272615  | 0.100719  | 0.132924     | 0.037405381 |

Table DS2: All SNPs tested for association (RDC SABP vs. controls) with the Cochran-Armitage trend test and significant at the p=0.05 threshold.

| chromosome | SNP           | MAF_cases | MAF_controls | p_value     |
|------------|---------------|-----------|--------------|-------------|
| 7          | rs17093280    | 0.0537634 | 0.0789922    | 0.037426103 |
| 11         | rs17092876    | 0.21147   | 0.252727     | 0.037426103 |
| 14         | rs1952036     | 0.405018  | 0.359332     | 0.037426103 |
| 15         | rs1426210     | 0.353047  | 0.308753     | 0.037426103 |
| 15         | rs17674205    | 0.103943  | 0.0781676    | 0.037426103 |
| 18         | rs7227096     | 0.368705  | 0.415361     | 0.037426103 |
| 20         | rs747996      | 0.188172  | 0.227071     | 0.037426103 |
| 4          | rs7691334     | 0.256272  | 0.299659     | 0.037446837 |
| 9          | rs7868610     | 0.365591  | 0.321441     | 0.037446837 |
| 18         | rs2440455     | 0.146953  | 0.18335      | 0.037446837 |
| 20         | rs6101937     | 0.284946  | 0.24316      | 0.037446837 |
| 1          | rs17435018    | 0.0985663 | 0.13045      | 0.037467583 |
| 4          | rs6852985     | 0.37276   | 0.328045     | 0.037467583 |
| 11         | rs4284419     | 0.185921  | 0.226065     | 0.037467583 |
| 18         | rs16954684    | 0.0685921 | 0.0477164    | 0.037467583 |
| 19         | rs4353567     | 0.469534  | 0.422802     | 0.037467583 |
| 21         | rs2825250     | 0.274194  | 0.318058     | 0.037467583 |
| 1          | rs1934368     | 0.210432  | 0.251192     | 0.037488342 |
| 2          | rs16828270    | 0.330325  | 0.376153     | 0.037488342 |
| 3          | rs11709020    | 0.51259   | 0.464894     | 0.037488342 |
| 8          | rs901170      | 0.318996  | 0.365077     | 0.037488342 |
| 17         | rs8182269     | 0.485663  | 0.439182     | 0.037488342 |
| 21         | rs2835081     | 0.134409  | 0.169734     | 0.037488342 |
| 1          | rs7522712     | 0.363799  | 0.31908      | 0.037509112 |
| 1          | rs10889075    | 0.267025  | 0.310474     | 0.037509112 |
| 5          | rs6895541     | 0.0863309 | 0.0632027    | 0.037509112 |
| 5          | rs905790      | 0.181159  | 0.220252     | 0.037509112 |
| 11         | rs4414194     | 0.0860215 | 0.116068     | 0.037509112 |
| 14         | rs4277270     | 0.130824  | 0.165815     | 0.037509112 |
| 15         | rs4354888     | 0.124549  | 0.0963568    | 0.037509112 |
| 15         | rs1403343     | 0.123656  | 0.0956685    | 0.037509112 |
| 16         | rs2738710     | 0.127698  | 0.162977     | 0.037509112 |
| 17         | rs9899093     | 0.15233   | 0.121382     | 0.037509112 |
| 5          | rs166116      | 0.152878  | 0.121382     | 0.037529895 |
| 10         | rs17116643    | 0.0519713 | 0.0769362    | 0.037529895 |
| 12         | rs7312475     | 0.351254  | 0.397987     | 0.037529895 |
| 16         | rs2646107     | 0.283154  | 0.242331     | 0.037529895 |
| 20         | rs2284390     | 0.0376344 | 0.0602451    | 0.037529895 |
| 2          | rs10221582    | 0.444245  | 0.397514     | 0.037550689 |
| 3          | rs9877228     | 0.370968  | 0.417633     | 0.037550689 |
| 4          | SNP_A-2159263 | 0.188849  | 0.153872     | 0.037550689 |
| 5          | rs13361200    | 0.413669  | 0.367497     | 0.037550689 |
| 21         | rs2829545     | 0.528674  | 0.481273     | 0.037550689 |
| 2          | rs1423710     | 0.357914  | 0.313269     | 0.037571496 |
| 6          | rs17792460    | 0.273381  | 0.233061     | 0.037571496 |
| 11         | rs1466553     | 0.267986  | 0.227831     | 0.037571496 |
| 13         | rs9541361     | 0.0483871 | 0.0730088    | 0.037571496 |
| 17         | rs11079675    | 0.170251  | 0.208887     | 0.037571496 |
| 3          | rs6791520     | 0.453405  | 0.406846     | 0.037592314 |
| 9          | rs4978041     | 0.217626  | 0.258773     | 0.037592314 |
| 9          | rs1180089     | 0.0448029 | 0.0686776    | 0.037592314 |
| 1          | rs16841094    | 0.0501792 | 0.0749319    | 0.037613145 |

Table DS2: All SNPs tested for association (RDC SABP vs. controls) with the Cochran-Armitage trend test and significant at the p=0.05 threshold.

| chromosome | SNP           | MAF_cases | MAF_controls | p_value     |
|------------|---------------|-----------|--------------|-------------|
| 2          | rs12465448    | 0.299283  | 0.257524     | 0.037613145 |
| 2          | rs16839731    | 0.297491  | 0.342105     | 0.037613145 |
| 3          | rs9835230     | 0.286738  | 0.245653     | 0.037613145 |
| 6          | rs804846      | 0.322581  | 0.280239     | 0.037613145 |
| 8          | rs972423      | 0.442652  | 0.490286     | 0.037613145 |
| 12         | rs2365567     | 0.383094  | 0.338055     | 0.037613145 |
| 14         | rs1955554     | 0.240143  | 0.28318      | 0.037613145 |
| 15         | rs17651361    | 0.241935  | 0.284838     | 0.037613145 |
| 16         | rs2550608     | 0.256272  | 0.217451     | 0.037613145 |
| 17         | rs16961730    | 0.139785  | 0.17592      | 0.037613145 |
| 18         | rs3193        | 0.0791367 | 0.107947     | 0.037613145 |
| 2          | SNP_A-4250284 | 0.0734767 | 0.0519061    | 0.037633988 |
| 4          | rs3213948     | 0.383513  | 0.430811     | 0.037633988 |
| 12         | rs1909510     | 0.421147  | 0.468462     | 0.037633988 |
| 15         | rs2899488     | 0.140288  | 0.17626      | 0.037633988 |
| 1          | rs491922      | 0.462366  | 0.416127     | 0.037654843 |
| 3          | rs17060736    | 0.0860215 | 0.116684     | 0.037654843 |
| 3          | rs7629708     | 0.324373  | 0.281601     | 0.037654843 |
| 8          | rs1139843     | 0.0778986 | 0.107058     | 0.037654843 |
| 18         | rs216559      | 0.324373  | 0.370654     | 0.037654843 |
| 21         | rs2837600     | 0.331541  | 0.377941     | 0.037654843 |
| 4          | rs17672919    | 0.480216  | 0.43264      | 0.03767571  |
| 22         | rs138639      | 0.109712  | 0.0831346    | 0.03767571  |
| 1          | rs11807752    | 0.205036  | 0.169792     | 0.037696589 |
| 4          | rs1874646     | 0.42446   | 0.378277     | 0.037696589 |
| 4          | rs4150060     | 0.0394265 | 0.0619031    | 0.037696589 |
| 11         | rs7128465     | 0.370968  | 0.417916     | 0.037696589 |
| 18         | rs11660899    | 0.259857  | 0.303444     | 0.037696589 |
| 2          | rs1358138     | 0.167266  | 0.13472      | 0.03771748  |
| 9          | rs10868348    | 0.206835  | 0.247614     | 0.03771748  |
| 13         | rs9544802     | 0.52518   | 0.477327     | 0.03771748  |
| 1          | SNP_A-1946651 | 0.17446   | 0.213288     | 0.037738384 |
| 1          | rs4915889     | 0.157706  | 0.195022     | 0.037738384 |
| 10         | rs2985523     | 0.207581  | 0.248212     | 0.037738384 |
| 11         | rs1426576     | 0.308664  | 0.353762     | 0.037738384 |
| 8          | rs3802149     | 0.170863  | 0.209057     | 0.037759299 |
| 1          | rs10915928    | 0.387097  | 0.434085     | 0.037780227 |
| 2          | rs10196805    | 0.170251  | 0.209029     | 0.037780227 |
| 2          | rs3755460     | 0.379061  | 0.425939     | 0.037780227 |
| 2          | rs10205062    | 0.205036  | 0.245656     | 0.037780227 |
| 5          | rs13174179    | 0.362007  | 0.318337     | 0.037780227 |
| 7          | rs877279      | 0.419065  | 0.373083     | 0.037780227 |
| 13         | rs354467      | 0.189964  | 0.155078     | 0.037780227 |
| 20         | rs6068158     | 0.25448   | 0.215041     | 0.037780227 |
| 7          | rs160360      | 0.141577  | 0.111395     | 0.037801167 |
| 15         | rs865576      | 0.431655  | 0.385193     | 0.037801167 |
| 2          | rs2033804     | 0.4319    | 0.385705     | 0.037822119 |
| 4          | rs17573717    | 0.485612  | 0.438671     | 0.037822119 |
| 4          | rs7689094     | 0.276978  | 0.236842     | 0.037822119 |
| 6          | rs9383211     | 0.191756  | 0.157303     | 0.037822119 |
| 13         | rs9544807     | 0.52518   | 0.477366     | 0.037822119 |
| 17         | rs11657971    | 0.420578  | 0.468111     | 0.037822119 |

Table DS2: All SNPs tested for association (RDC SABP vs. controls) with the Cochran-Armitage trend test and significant at the p=0.05 threshold.

| chromosome | SNP           | MAF_cases | MAF_controls | p_value     |
|------------|---------------|-----------|--------------|-------------|
| 20         | rs976649      | 0.218412  | 0.181029     | 0.037822119 |
| 1          | rs1838131     | 0.336918  | 0.383084     | 0.037843083 |
| 2          | rs368430      | 0.306452  | 0.264125     | 0.037843083 |
| 2          | rs9678037     | 0.177419  | 0.143782     | 0.037843083 |
| 5          | rs12518136    | 0.155914  | 0.192845     | 0.037843083 |
| 10         | rs2633320     | 0.225806  | 0.267961     | 0.037843083 |
| 11         | rs1108991     | 0.353047  | 0.309435     | 0.037843083 |
| 11         | rs12293395    | 0.234767  | 0.277191     | 0.037843083 |
| 13         | rs7994885     | 0.52509   | 0.477342     | 0.037843083 |
| 1          | rs10752858    | 0.384892  | 0.339523     | 0.037864059 |
| 2          | rs17039291    | 0.315412  | 0.36113      | 0.037864059 |
| 4          | rs7693077     | 0.109712  | 0.142589     | 0.037864059 |
| 5          | rs16879410    | 0.0938628 | 0.069089     | 0.037864059 |
| 6          | rs10807640    | 0.521505  | 0.474464     | 0.037864059 |
| 10         | rs4642999     | 0.0860215 | 0.115542     | 0.037864059 |
| 11         | rs10794280    | 0.406137  | 0.360969     | 0.037864059 |
| 11         | rs607890      | 0.385305  | 0.432709     | 0.037864059 |
| 1          | rs12039221    | 0.12724   | 0.16178      | 0.037885048 |
| 3          | rs9834518     | 0.114695  | 0.0875937    | 0.037885048 |
| 5          | rs507971      | 0.250896  | 0.211925     | 0.037885048 |
| 1          | rs2671239     | 0.392086  | 0.439611     | 0.037906049 |
| 2          | rs4851684     | 0.0376344 | 0.0596862    | 0.037906049 |
| 4          | SNP_A-4252491 | 0.032491  | 0.0530898    | 0.037906049 |
| 5          | rs246571      | 0.22043   | 0.183305     | 0.037906049 |
| 6          | rs6899876     | 0.33871   | 0.29523      | 0.037906049 |
| 8          | rs11989055    | 0.216846  | 0.180347     | 0.037906049 |
| 13         | rs1198624     | 0.100358  | 0.0751278    | 0.037906049 |
| 1          | rs974935      | 0.0483871 | 0.0729628    | 0.037927062 |
| 2          | SNP_A-2211853 | 0.491039  | 0.443952     | 0.037927062 |
| 2          | SNP_A-1966840 | 0.523297  | 0.475988     | 0.037927062 |
| 6          | rs7761677     | 0.435484  | 0.389135     | 0.037927062 |
| 6          | rs9342586     | 0.357914  | 0.404494     | 0.037927062 |
| 7          | rs17260734    | 0.517921  | 0.470338     | 0.037927062 |
| 8          | rs2930376     | 0.226619  | 0.188821     | 0.037927062 |
| 8          | rs2956054     | 0.219424  | 0.182345     | 0.037927062 |
| 10         | rs2991910     | 0.121864  | 0.0940054    | 0.037927062 |
| 18         | rs11664750    | 0.19964   | 0.2403       | 0.037927062 |
| 1          | rs11585913    | 0.0631769 | 0.0897785    | 0.037948087 |
| 2          | rs17356152    | 0.198925  | 0.239441     | 0.037948087 |
| 3          | rs4241432     | 0.508961  | 0.462193     | 0.037948087 |
| 5          | rs2929710     | 0.471223  | 0.423824     | 0.037948087 |
| 8          | rs75527       | 0.0412186 | 0.0641811    | 0.037948087 |
| 10         | rs1831586     | 0.120504  | 0.15449      | 0.037948087 |
| 16         | rs872942      | 0.507168  | 0.460661     | 0.037948087 |
| 1          | rs1325202     | 0.448029  | 0.495569     | 0.037969124 |
| 3          | rs882450      | 0.267025  | 0.311073     | 0.037969124 |
| 3          | rs2293235     | 0.184588  | 0.224191     | 0.037969124 |
| 8          | rs11774827    | 0.106115  | 0.138501     | 0.037969124 |
| 12         | rs4581486     | 0.235612  | 0.19714      | 0.037969124 |
| 15         | rs3848122     | 0.195341  | 0.235344     | 0.037969124 |
| 1          | rs10863919    | 0.401434  | 0.447871     | 0.037990174 |
| 3          | rs7642925     | 0.250896  | 0.212266     | 0.037990174 |

Table DS2: All SNPs tested for association (RDC SABP vs. controls) with the Cochran-Armitage trend test and significant at the p=0.05 threshold.

| chromosome | SNP        | MAF_cases | MAF_controls | p_value     |
|------------|------------|-----------|--------------|-------------|
| 4          | rs2044021  | 0.0722022 | 0.0509023    | 0.037990174 |
| 4          | rs13120304 | 0.421147  | 0.374787     | 0.037990174 |
| 4          | rs9307592  | 0.408602  | 0.362521     | 0.037990174 |
| 9          | rs616239   | 0.224014  | 0.26571      | 0.037990174 |
| 1          | rs1810738  | 0.448029  | 0.495563     | 0.038011236 |
| 2          | rs13387809 | 0.0412186 | 0.0640327    | 0.038011236 |
| 5          | rs17484704 | 0.250896  | 0.212338     | 0.038011236 |
| 7          | rs2189943  | 0.310036  | 0.355465     | 0.038011236 |
| 9          | rs4880140  | 0.264388  | 0.224385     | 0.038011236 |
| 17         | rs225207   | 0.191756  | 0.231608     | 0.038011236 |
| 21         | rs2205083  | 0.399281  | 0.447207     | 0.038011236 |
| 1          | rs12136771 | 0.388489  | 0.343345     | 0.03803231  |
| 2          | rs759615   | 0.286738  | 0.331687     | 0.03803231  |
| 3          | rs17465479 | 0.213262  | 0.176941     | 0.03803231  |
| 4          | rs10866356 | 0.494624  | 0.447288     | 0.03803231  |
| 17         | rs8069941  | 0.195341  | 0.235434     | 0.03803231  |
| 20         | rs4813418  | 0.365108  | 0.321137     | 0.03803231  |
| 1          | rs9286794  | 0.440647  | 0.488249     | 0.038053396 |
| 2          | rs16987857 | 0.0555556 | 0.0810627    | 0.038053396 |
| 2          | rs872037   | 0.395683  | 0.350256     | 0.038053396 |
| 2          | rs7576477  | 0.172043  | 0.139448     | 0.038053396 |
| 2          | rs6436114  | 0.272401  | 0.232119     | 0.038053396 |
| 4          | rs4596251  | 0.191756  | 0.156836     | 0.038053396 |
| 4          | rs4862600  | 0.433453  | 0.387053     | 0.038053396 |
| 4          | rs931888   | 0.419355  | 0.466076     | 0.038053396 |
| 1          | rs17390595 | 0.216846  | 0.258268     | 0.038074494 |
| 1          | rs10797059 | 0.167266  | 0.134537     | 0.038074494 |
| 8          | rs17348805 | 0.411871  | 0.459044     | 0.038074494 |
| 20         | rs6134623  | 0.0573477 | 0.0833901    | 0.038074494 |
| 2          | rs2339379  | 0.274194  | 0.317888     | 0.038095605 |
| 3          | rs6794184  | 0.210432  | 0.251449     | 0.038095605 |
| 5          | rs13152920 | 0.367384  | 0.323559     | 0.038095605 |
| 7          | rs7791845  | 0.523381  | 0.47615      | 0.038095605 |
| 19         | rs1059840  | 0.18705   | 0.1523       | 0.038095605 |
| 19         | rs1618385  | 0.381295  | 0.335887     | 0.038095605 |
| 20         | rs232262   | 0.370504  | 0.418089     | 0.038095605 |
| 2          | rs12692450 | 0.44086   | 0.488424     | 0.038116728 |
| 2          | rs4670032  | 0.340502  | 0.296998     | 0.038116728 |
| 3          | rs7642028  | 0.455036  | 0.501874     | 0.038116728 |
| 4          | rs6827968  | 0.326165  | 0.372402     | 0.038116728 |
| 8          | rs4492338  | 0.188849  | 0.154555     | 0.038116728 |
| 2          | rs2291312  | 0.0503597 | 0.074983     | 0.038137864 |
| 5          | rs1354163  | 0.184588  | 0.150834     | 0.038137864 |
| 11         | rs4436551  | 0.415771  | 0.462679     | 0.038137864 |
| 12         | rs1025606  | 0.338129  | 0.38434      | 0.038137864 |
| 16         | rs11076318 | 0.526882  | 0.479905     | 0.038137864 |
| 17         | rs4474741  | 0.523297  | 0.475801     | 0.038137864 |
| 18         | rs9955296  | 0.202509  | 0.243354     | 0.038137864 |
| 1          | rs2606414  | 0.335125  | 0.291993     | 0.038159011 |
| 2          | rs17041996 | 0.210432  | 0.174054     | 0.038159011 |
| 3          | rs2637757  | 0.310036  | 0.355268     | 0.038159011 |
| 5          | rs4958676  | 0.222222  | 0.1855       | 0.038159011 |

Table DS2: All SNPs tested for association (RDC SABP vs. controls) with the Cochran-Armitage trend test and significant at the p=0.05 threshold.

| chromosome | SNP           | MAF_cases | MAF_controls | p_value     |
|------------|---------------|-----------|--------------|-------------|
| 11         | rs10766134    | 0.335125  | 0.380539     | 0.038159011 |
| 20         | rs6108022     | 0.505376  | 0.459114     | 0.038159011 |
| 20         | rs13042216    | 0.363799  | 0.320054     | 0.038159011 |
| 1          | rs7518063     | 0.28853   | 0.332481     | 0.038180171 |
| 2          | rs7577851     | 0.215054  | 0.178365     | 0.038180171 |
| 4          | rs6837311     | 0.421147  | 0.374915     | 0.038180171 |
| 4          | rs1845713     | 0.311151  | 0.356239     | 0.038180171 |
| 6          | rs6924146     | 0.145161  | 0.114431     | 0.038180171 |
| 7          | rs11973288    | 0.136201  | 0.171555     | 0.038180171 |
| 8          | rs2680605     | 0.0971223 | 0.0724514    | 0.038180171 |
| 10         | rs3104660     | 0.236559  | 0.278725     | 0.038180171 |
| 1          | rs1561499     | 0.265233  | 0.308583     | 0.038201344 |
| 2          | rs10191167    | 0.265233  | 0.308583     | 0.038201344 |
| 5          | rs7723470     | 0.180505  | 0.219891     | 0.038201344 |
| 22         | rs4820232     | 0.360215  | 0.316525     | 0.038201344 |
| 8          | rs2979126     | 0.111511  | 0.144293     | 0.038222528 |
| 9          | rs7027227     | 0.0896057 | 0.120273     | 0.038222528 |
| 11         | rs11224301    | 0.0824373 | 0.0599181    | 0.038222528 |
| 13         | rs7140117     | 0.194245  | 0.234322     | 0.038222528 |
| 14         | rs10149207    | 0.306452  | 0.351618     | 0.038222528 |
| 18         | rs1245724     | 0.184588  | 0.150767     | 0.038222528 |
| 18         | rs11664295    | 0.372302  | 0.327933     | 0.038222528 |
| 21         | rs6517304     | 0.158273  | 0.126362     | 0.038222528 |
| 21         | rs1048547     | 0.132616  | 0.167177     | 0.038222528 |
| 2          | rs12694558    | 0.370968  | 0.417007     | 0.038243725 |
| 4          | rs1884411     | 0.293907  | 0.338506     | 0.038243725 |
| 5          | rs4701016     | 0.235612  | 0.277986     | 0.038243725 |
| 7          | rs10247565    | 0.528881  | 0.481058     | 0.038243725 |
| 6          | rs6907072     | 0.27957   | 0.32391      | 0.038264934 |
| 7          | rs2108388     | 0.295699  | 0.254772     | 0.038264934 |
| 7          | rs1860690     | 0.136201  | 0.171492     | 0.038264934 |
| 10         | rs11814440    | 0.390681  | 0.437266     | 0.038264934 |
| 11         | rs10840176    | 0.366906  | 0.413846     | 0.038264934 |
| 17         | rs9910653     | 0.354839  | 0.310627     | 0.038264934 |
| 2          | SNP_A-1920052 | 0.073741  | 0.052165     | 0.038286156 |
| 4          | rs4862449     | 0.415771  | 0.463543     | 0.038286156 |
| 7          | rs1806467     | 0.0878136 | 0.118318     | 0.038286156 |
| 11         | rs2068011     | 0.268953  | 0.229117     | 0.038286156 |
| 12         | rs430102      | 0.410394  | 0.364952     | 0.038286156 |
| 14         | rs11159248    | 0.410394  | 0.456943     | 0.038286156 |
| 1          | rs2211332     | 0.227599  | 0.26931      | 0.038307389 |
| 1          | rs769340      | 0.0827338 | 0.0601504    | 0.038307389 |
| 1          | rs11102368    | 0.396057  | 0.44219      | 0.038307389 |
| 8          | rs11779914    | 0.277778  | 0.321696     | 0.038307389 |
| 13         | rs275903      | 0.318345  | 0.275656     | 0.038307389 |
| 16         | rs2105842     | 0.420578  | 0.374872     | 0.038307389 |
| 2          | SNP_A-2073495 | 0.205036  | 0.246083     | 0.038328636 |
| 6          | rs674708      | 0.0863309 | 0.0630753    | 0.038328636 |
| 8          | rs4735382     | 0.164875  | 0.201838     | 0.038328636 |
| 15         | rs12437672    | 0.354839  | 0.310668     | 0.038328636 |
| 15         | rs967180      | 0.304659  | 0.34971      | 0.038328636 |
| 18         | rs17806462    | 0.152878  | 0.189755     | 0.038328636 |

Table DS2: All SNPs tested for association (RDC SABP vs. controls) with the Cochran-Armitage trend test and significant at the p=0.05 threshold.

| chromosome | SNP        | MAF_cases | MAF_controls | p_value     |
|------------|------------|-----------|--------------|-------------|
| 2          | rs1013694  | 0.204301  | 0.24455      | 0.038349894 |
| 2          | rs7595229  | 0.206835  | 0.170811     | 0.038349894 |
| 5          | rs6891486  | 0.112903  | 0.145507     | 0.038349894 |
| 5          | rs1564104  | 0.142086  | 0.177914     | 0.038349894 |
| 8          | rs6415628  | 0.446237  | 0.493015     | 0.038349894 |
| 10         | rs12221035 | 0.0663082 | 0.0932925    | 0.038349894 |
| 6          | rs756293   | 0.130824  | 0.166553     | 0.038371165 |
| 7          | rs7809688  | 0.123656  | 0.157922     | 0.038371165 |
| 13         | rs9530244  | 0.471326  | 0.425068     | 0.038371165 |
| 14         | rs917426   | 0.498195  | 0.449932     | 0.038371165 |
| 4          | rs1497493  | 0.424731  | 0.378788     | 0.038392448 |
| 7          | rs722470   | 0.103943  | 0.136053     | 0.038392448 |
| 7          | rs4725367  | 0.496403  | 0.449098     | 0.038392448 |
| 11         | rs4922981  | 0.159498  | 0.197037     | 0.038392448 |
| 14         | rs1546936  | 0.240143  | 0.282964     | 0.038392448 |
| 16         | rs9927211  | 0.259857  | 0.220974     | 0.038392448 |
| 19         | rs1260534  | 0.5       | 0.452981     | 0.038392448 |
| 22         | rs415170   | 0.374552  | 0.330041     | 0.038392448 |
| 5          | rs729017   | 0.417563  | 0.371978     | 0.038413744 |
| 8          | rs10504242 | 0.0555556 | 0.0809475    | 0.038413744 |
| 17         | rs3902482  | 0.168459  | 0.206814     | 0.038413744 |
| 3          | rs16829809 | 0.155914  | 0.124447     | 0.038435052 |
| 3          | rs6804855  | 0.196043  | 0.161098     | 0.038435052 |
| 4          | rs7667281  | 0.444444  | 0.398126     | 0.038435052 |
| 8          | rs13278000 | 0.356631  | 0.402555     | 0.038435052 |
| 12         | rs6598153  | 0.420863  | 0.375298     | 0.038435052 |
| 17         | rs8067440  | 0.419355  | 0.372954     | 0.038435052 |
| 6          | rs210619   | 0.408273  | 0.455662     | 0.038456372 |
| 7          | rs6467276  | 0.397849  | 0.444501     | 0.038456372 |
| 10         | rs11007187 | 0.196043  | 0.235945     | 0.038456372 |
| 10         | rs10822736 | 0.390288  | 0.437266     | 0.038456372 |
| 11         | rs10160673 | 0.397112  | 0.443609     | 0.038456372 |
| 12         | rs7979816  | 0.213262  | 0.176941     | 0.038456372 |
| 14         | rs8012092  | 0.240143  | 0.283032     | 0.038456372 |
| 15         | rs12440948 | 0.241935  | 0.284594     | 0.038456372 |
| 2          | rs13027580 | 0.379928  | 0.426746     | 0.038477705 |
| 2          | rs10188228 | 0.424731  | 0.379263     | 0.038477705 |
| 4          | rs13105975 | 0.0967742 | 0.0720123    | 0.038477705 |
| 6          | rs1001978  | 0.0501792 | 0.074421     | 0.038477705 |
| 8          | rs330003   | 0.0394265 | 0.0620102    | 0.038477705 |
| 10         | rs3864832  | 0.316547  | 0.361282     | 0.038477705 |
| 2          | rs1867868  | 0.541219  | 0.492843     | 0.03849905  |
| 13         | rs7329513  | 0.301075  | 0.259884     | 0.03849905  |
| 18         | rs7227343  | 0.415771  | 0.370358     | 0.03849905  |
| 2          | rs17347194 | 0.182796  | 0.148842     | 0.038520408 |
| 2          | rs16862227 | 0.192446  | 0.232471     | 0.038520408 |
| 4          | rs724516   | 0.0665468 | 0.0938671    | 0.038520408 |
| 5          | rs3776352  | 0.0555556 | 0.0803144    | 0.038520408 |
| 7          | rs12535212 | 0.0681004 | 0.0958787    | 0.038520408 |
| 12         | rs12425038 | 0.143369  | 0.113211     | 0.038520408 |
| 1          | rs4660095  | 0.33871   | 0.385061     | 0.038541778 |
| 3          | rs4241433  | 0.508961  | 0.462338     | 0.038541778 |



Table DS2: All SNPs tested for association (RDC SABP vs. controls) with the Cochran-Armitage trend test and significant at the p=0.05 threshold.

| chromosome | SNP        | MAF_cases | MAF_controls | p_value     |
|------------|------------|-----------|--------------|-------------|
| 4          | rs10491463 | 0.273381  | 0.317717     | 0.038541778 |
| 5          | rs922372   | 0.344086  | 0.390614     | 0.038541778 |
| 8          | rs4872499  | 0.191756  | 0.231529     | 0.038541778 |
| 9          | rs10983777 | 0.232852  | 0.195541     | 0.038541778 |
| 10         | rs284857   | 0.362007  | 0.409122     | 0.038541778 |
| 16         | rs9932114  | 0.0485612 | 0.0725971    | 0.038541778 |
| 1          | rs6695566  | 0.411871  | 0.458617     | 0.038563161 |
| 4          | rs7669547  | 0.264388  | 0.224855     | 0.038563161 |
| 6          | rs563906   | 0.236559  | 0.198604     | 0.038563161 |
| 8          | rs2514999  | 0.188172  | 0.227443     | 0.038563161 |
| 10         | rs2915765  | 0.439068  | 0.48552      | 0.038563161 |
| 15         | rs189499   | 0.145161  | 0.18092      | 0.038563161 |
| 4          | rs17294586 | 0.310036  | 0.267869     | 0.038584556 |
| 11         | rs10896152 | 0.503597  | 0.456559     | 0.038584556 |
| 14         | rs11847286 | 0.403226  | 0.357581     | 0.038584556 |
| 15         | rs17614005 | 0.405018  | 0.359332     | 0.038584556 |
| 4          | rs4865041  | 0.370968  | 0.41786      | 0.038605963 |
| 8          | rs6558527  | 0.21147   | 0.175418     | 0.038605963 |
| 20         | rs6075846  | 0.202509  | 0.242843     | 0.038605963 |
| 21         | rs7282109  | 0.190647  | 0.230375     | 0.038605963 |
| 4          | rs10010781 | 0.480287  | 0.433151     | 0.038627383 |
| 4          | rs4512020  | 0.155914  | 0.192845     | 0.038627383 |
| 6          | rs9363646  | 0.363799  | 0.411043     | 0.038627383 |
| 9          | rs2225330  | 0.234767  | 0.19697      | 0.038627383 |
| 12         | rs11174549 | 0.0770609 | 0.105658     | 0.038627383 |
| 15         | rs8032301  | 0.385305  | 0.432221     | 0.038627383 |
| 3          | rs1882257  | 0.354317  | 0.31094      | 0.038648815 |
| 4          | rs13102887 | 0.173835  | 0.212555     | 0.038648815 |
| 8          | rs10503192 | 0.172043  | 0.210347     | 0.038648815 |
| 8          | rs13260884 | 0.390681  | 0.437095     | 0.038648815 |
| 14         | rs4904770  | 0.15233   | 0.188991     | 0.038648815 |
| 1          | rs6666930  | 0.23741   | 0.199523     | 0.03867026  |
| 2          | rs6752303  | 0.455197  | 0.409261     | 0.03867026  |
| 6          | rs9476543  | 0.508961  | 0.461971     | 0.03867026  |
| 6          | rs636803   | 0.351254  | 0.397274     | 0.03867026  |
| 13         | rs609746   | 0.0483871 | 0.0725999    | 0.03867026  |
| 20         | rs1474735  | 0.270609  | 0.231018     | 0.03867026  |
| 4          | rs16997921 | 0.0698925 | 0.0492838    | 0.038691717 |
| 5          | rs6887471  | 0.182796  | 0.148943     | 0.038691717 |
| 5          | rs6556460  | 0.21223   | 0.253324     | 0.038691717 |
| 11         | rs217109   | 0.18705   | 0.152863     | 0.038691717 |
| 21         | rs882776   | 0.492832  | 0.445941     | 0.038691717 |
| 1          | rs448385   | 0.480287  | 0.433731     | 0.038713187 |
| 1          | rs17116084 | 0.155914  | 0.124489     | 0.038713187 |
| 1          | rs10797667 | 0.47491   | 0.428328     | 0.038713187 |
| 3          | rs6549489  | 0.263441  | 0.307496     | 0.038713187 |
| 10         | rs2274027  | 0.139785  | 0.174898     | 0.038713187 |
| 11         | rs11029891 | 0.464029  | 0.41732      | 0.038713187 |
| 12         | rs3850591  | 0.120072  | 0.153951     | 0.038713187 |
| 14         | rs10140164 | 0.482079  | 0.435242     | 0.038713187 |
| 18         | rs9958208  | 0.0806452 | 0.10937      | 0.038713187 |
| 18         | rs9958002  | 0.0806452 | 0.10937      | 0.038713187 |

Table DS2: All SNPs tested for association (RDC SABP vs. controls) with the Cochran-Armitage trend test and significant at the p=0.05 threshold.

| chromosome | SNP           | MAF_cases | MAF_controls | p_value     |
|------------|---------------|-----------|--------------|-------------|
| 19         | rs10401931    | 0.189964  | 0.155962     | 0.038713187 |
| 19         | rs7247184     | 0.286738  | 0.245999     | 0.038713187 |
| 3          | rs1874981     | 0.141577  | 0.111925     | 0.038734669 |
| 4          | rs1126153     | 0.27957   | 0.239182     | 0.038734669 |
| 4          | rs3775321     | 0.476703  | 0.429277     | 0.038734669 |
| 6          | rs514778      | 0.139785  | 0.110051     | 0.038734669 |
| 7          | rs3807807     | 0.451613  | 0.404973     | 0.038734669 |
| 18         | rs9959874     | 0.046595  | 0.0701874    | 0.038734669 |
| 2          | rs4670019     | 0.306859  | 0.264986     | 0.038756164 |
| 3          | rs7643223     | 0.456989  | 0.504087     | 0.038756164 |
| 6          | rs13208607    | 0.215054  | 0.178474     | 0.038756164 |
| 15         | rs11638433    | 0.272563  | 0.316757     | 0.038756164 |
| 22         | rs135775      | 0.136691  | 0.107289     | 0.038756164 |
| 1          | rs3125904     | 0.18705   | 0.152418     | 0.038777671 |
| 6          | rs2397673     | 0.367384  | 0.323119     | 0.038777671 |
| 8          | rs2000439     | 0.369176  | 0.415531     | 0.038777671 |
| 18         | rs10853356    | 0.259857  | 0.30317      | 0.038777671 |
| 18         | rs4121551     | 0.259857  | 0.30317      | 0.038777671 |
| 18         | rs12970656    | 0.172043  | 0.13921      | 0.038777671 |
| 19         | rs1233441     | 0.292115  | 0.336634     | 0.038777671 |
| 22         | rs1003861     | 0.306452  | 0.265327     | 0.038777671 |
| 5          | rs6875660     | 0.0851449 | 0.114544     | 0.038799191 |
| 6          | rs13215593    | 0.145161  | 0.114402     | 0.038799191 |
| 11         | rs11023096    | 0.229391  | 0.191823     | 0.038799191 |
| 5          | rs10057750    | 0.301075  | 0.345826     | 0.038820723 |
| 6          | SNP_A-1932884 | 0.0359712 | 0.057712     | 0.038820723 |
| 6          | rs3132959     | 0.277978  | 0.236806     | 0.038820723 |
| 7          | rs11562068    | 0.225806  | 0.189139     | 0.038820723 |
| 7          | rs6973585     | 0.0483871 | 0.0725724    | 0.038820723 |
| 17         | rs4794563     | 0.42446   | 0.378236     | 0.038820723 |
| 21         | rs13046811    | 0.125448  | 0.159632     | 0.038820723 |
| 2          | rs6419590     | 0.399642  | 0.354465     | 0.038842268 |
| 7          | rs7782781     | 0.420863  | 0.37483      | 0.038842268 |
| 19         | rs892595      | 0.282374  | 0.326569     | 0.038842268 |
| 2          | rs16864465    | 0.378136  | 0.333277     | 0.038863825 |
| 2          | rs4953105     | 0.37276   | 0.328162     | 0.038863825 |
| 2          | rs12465378    | 0.381295  | 0.335834     | 0.038863825 |
| 3          | rs7609906     | 0.250896  | 0.212436     | 0.038863825 |
| 4          | rs9999604     | 0.216846  | 0.180409     | 0.038863825 |
| 4          | rs6532592     | 0.360215  | 0.406474     | 0.038863825 |
| 5          | rs2916860     | 0.136691  | 0.172114     | 0.038863825 |
| 5          | rs11954232    | 0.395683  | 0.443193     | 0.038863825 |
| 7          | rs1953298     | 0.392086  | 0.438842     | 0.038863825 |
| 8          | rs17804798    | 0.100358  | 0.131892     | 0.038863825 |
| 1          | rs3856250     | 0.0503597 | 0.074421     | 0.038885395 |
| 3          | rs13068431    | 0.137993  | 0.173654     | 0.038885395 |
| 3          | rs9828866     | 0.383094  | 0.430328     | 0.038885395 |
| 5          | rs7712927     | 0.0806452 | 0.0585432    | 0.038885395 |
| 6          | rs6901022     | 0.284946  | 0.329922     | 0.038885395 |
| 11         | rs633687      | 0.292115  | 0.251618     | 0.038885395 |
| 20         | rs16991842    | 0.073741  | 0.052165     | 0.038885395 |
| 20         | rs6025056     | 0.108696  | 0.140614     | 0.038885395 |

Table DS2: All SNPs tested for association (RDC SABP vs. controls) with the Cochran-Armitage trend test and significant at the p=0.05 threshold.

| chromosome | SNP           | MAF_cases | MAF_controls | p_value     |
|------------|---------------|-----------|--------------|-------------|
| 1          | SNP_A-2193705 | 0.0611511 | 0.0874915    | 0.038906977 |
| 6          | rs9356861     | 0.532258  | 0.485009     | 0.038906977 |
| 10         | rs11001685    | 0.146953  | 0.183458     | 0.038906977 |
| 11         | rs10791209    | 0.334532  | 0.291325     | 0.038906977 |
| 12         | rs2133294     | 0.360215  | 0.406197     | 0.038906977 |
| 19         | rs4346301     | 0.215054  | 0.256738     | 0.038906977 |
| 8          | rs6471555     | 0.530466  | 0.483629     | 0.038928572 |
| 13         | rs754393      | 0.307554  | 0.352257     | 0.038928572 |
| 17         | rs4793109     | 0.388889  | 0.435138     | 0.038928572 |
| 18         | rs216558      | 0.324373  | 0.370358     | 0.038928572 |
| 20         | rs16984521    | 0.116487  | 0.149693     | 0.038928572 |
| 2          | rs1403357     | 0.270609  | 0.23014      | 0.03895018  |
| 4          | rs17051039    | 0.129032  | 0.100681     | 0.03895018  |
| 10         | rs3977736     | 0.244604  | 0.206133     | 0.03895018  |
| 5          | rs7718843     | 0.201087  | 0.165642     | 0.0389718   |
| 7          | rs7781054     | 0.296763  | 0.341792     | 0.0389718   |
| 1          | rs7536778     | 0.181004  | 0.147289     | 0.038993433 |
| 1          | rs10926624    | 0.33871   | 0.384786     | 0.038993433 |
| 2          | rs820773      | 0.417266  | 0.371677     | 0.038993433 |
| 4          | rs10517279    | 0.123656  | 0.157805     | 0.038993433 |
| 4          | rs17197854    | 0.24552   | 0.288075     | 0.038993433 |
| 5          | rs17139251    | 0.0448029 | 0.0682128    | 0.038993433 |
| 6          | rs4897270     | 0.378136  | 0.333731     | 0.038993433 |
| 10         | rs2458696     | 0.188849  | 0.154514     | 0.038993433 |
| 5          | rs6888228     | 0.0896057 | 0.119502     | 0.039015078 |
| 7          | rs12705276    | 0.111511  | 0.144463     | 0.039015078 |
| 8          | rs925688      | 0.52509   | 0.478172     | 0.039015078 |
| 12         | rs17045649    | 0.188172  | 0.153767     | 0.039015078 |
| 13         | rs4371024     | 0.350719  | 0.396763     | 0.039015078 |
| 15         | rs7180939     | 0.214029  | 0.255106     | 0.039015078 |
| 2          | rs17032980    | 0.150538  | 0.187713     | 0.039036736 |
| 5          | rs17084873    | 0.114695  | 0.14734      | 0.039036736 |
| 16         | rs1471379     | 0.344086  | 0.390157     | 0.039036736 |
| 20         | rs6049811     | 0.413357  | 0.367657     | 0.039036736 |
| 20         | rs6129968     | 0.43705   | 0.483772     | 0.039036736 |
| 20         | rs1883843     | 0.301444  | 0.346325     | 0.039036736 |
| 21         | rs6586252     | 0.435252  | 0.389703     | 0.039036736 |
| 4          | rs1491150     | 0.523297  | 0.476158     | 0.039058406 |
| 4          | rs6811144     | 0.498188  | 0.450546     | 0.039058406 |
| 5          | rs2251843     | 0.523381  | 0.476677     | 0.039058406 |
| 6          | rs9490287     | 0.188172  | 0.153899     | 0.039058406 |
| 13         | rs1517895     | 0.367384  | 0.414276     | 0.039058406 |
| 2          | rs7571677     | 0.191756  | 0.231399     | 0.03908009  |
| 3          | rs10804636    | 0.203237  | 0.168146     | 0.03908009  |
| 18         | rs9961327     | 0.498208  | 0.451431     | 0.03908009  |
| 21         | rs2825400     | 0.366906  | 0.413488     | 0.03908009  |
| 1          | rs4949188     | 0.25      | 0.292206     | 0.039101785 |
| 1          | rs7551255     | 0.288809  | 0.332652     | 0.039101785 |
| 2          | rs7607093     | 0.320144  | 0.365293     | 0.039101785 |
| 2          | rs6430136     | 0.338129  | 0.383907     | 0.039101785 |
| 6          | rs9294436     | 0.206093  | 0.171039     | 0.039101785 |
| 9          | rs2006898     | 0.374552  | 0.420559     | 0.039101785 |

Table DS2: All SNPs tested for association (RDC SABP vs. controls) with the Cochran-Armitage trend test and significant at the p=0.05 threshold.

| chromosome | SNP           | MAF_cases | MAF_controls | p_value     |
|------------|---------------|-----------|--------------|-------------|
| 13         | rs9575331     | 0.514337  | 0.467076     | 0.039101785 |
| 13         | rs7321419     | 0.09319   | 0.0691652    | 0.039101785 |
| 14         | rs4420467     | 0.348921  | 0.305584     | 0.039101785 |
| 14         | rs11160778    | 0.412186  | 0.366735     | 0.039101785 |
| 15         | rs12914231    | 0.324373  | 0.369639     | 0.039101785 |
| 17         | rs11656936    | 0.195341  | 0.235695     | 0.039101785 |
| 19         | rs846900      | 0.387097  | 0.342852     | 0.039101785 |
| 9          | rs534214      | 0.410394  | 0.457411     | 0.039123494 |
| 10         | rs2944531     | 0.0645161 | 0.091002     | 0.039123494 |
| 1          | rs3121522     | 0.241935  | 0.284254     | 0.039145215 |
| 4          | rs10866251    | 0.209677  | 0.250767     | 0.039145215 |
| 5          | rs2643467     | 0.508961  | 0.461814     | 0.039145215 |
| 13         | rs9575249     | 0.0752688 | 0.0538698    | 0.039145215 |
| 2          | rs17007725    | 0.0537634 | 0.0786153    | 0.039166948 |
| 5          | rs574689      | 0.242806  | 0.285373     | 0.039166948 |
| 6          | rs573594      | 0.218638  | 0.181834     | 0.039166948 |
| 7          | rs7794569     | 0.37276   | 0.328844     | 0.039166948 |
| 9          | rs10982513    | 0.234767  | 0.197073     | 0.039166948 |
| 12         | rs10777800    | 0.0394265 | 0.0622018    | 0.039166948 |
| 13         | rs9512233     | 0.329749  | 0.286785     | 0.039166948 |
| 17         | SNP_A-2287737 | 0.318996  | 0.277154     | 0.039166948 |
| 2          | rs1017769     | 0.102151  | 0.0771721    | 0.039188695 |
| 7          | rs215596      | 0.343636  | 0.389854     | 0.039188695 |
| 7          | rs17647278    | 0.175627  | 0.142613     | 0.039188695 |
| 8          | rs454265      | 0.304659  | 0.349301     | 0.039188695 |
| 11         | rs12803129    | 0.458781  | 0.412636     | 0.039188695 |
| 13         | rs9554723     | 0.143369  | 0.179496     | 0.039188695 |
| 13         | rs1854977     | 0.216846  | 0.258092     | 0.039188695 |
| 1          | rs12043418    | 0.277778  | 0.321307     | 0.039210454 |
| 2          | rs3213775     | 0.100358  | 0.075179     | 0.039210454 |
| 6          | rs6899814     | 0.392086  | 0.439033     | 0.039210454 |
| 8          | rs12677457    | 0.299283  | 0.344581     | 0.039210454 |
| 17         | rs1521462     | 0.453405  | 0.407464     | 0.039210454 |
| 4          | rs17293345    | 0.309353  | 0.26728      | 0.039232225 |
| 5          | rs16882648    | 0.249104  | 0.210392     | 0.039232225 |
| 5          | rs3857299     | 0.134409  | 0.169561     | 0.039232225 |
| 9          | rs7042135     | 0.467626  | 0.420865     | 0.039232225 |
| 10         | rs11259685    | 0.494624  | 0.447736     | 0.039232225 |
| 12         | rs11174412    | 0.348921  | 0.305896     | 0.039232225 |
| 1          | rs10796969    | 0.405018  | 0.451822     | 0.03925401  |
| 4          | rs7672440     | 0.40681   | 0.360988     | 0.03925401  |
| 4          | rs2709812     | 0.392473  | 0.438991     | 0.03925401  |
| 11         | rs217099      | 0.193548  | 0.158952     | 0.03925401  |
| 13         | rs9558531     | 0.281362  | 0.324762     | 0.03925401  |
| 13         | rs6492751     | 0.401434  | 0.356851     | 0.03925401  |
| 15         | rs7171755     | 0.369176  | 0.414563     | 0.03925401  |
| 21         | rs2205560     | 0.277778  | 0.237632     | 0.03925401  |
| 9          | rs1542029     | 0.20471   | 0.168997     | 0.039275807 |
| 13         | rs912607      | 0.32491   | 0.369632     | 0.039275807 |
| 15         | rs7163288     | 0.258065  | 0.300136     | 0.039275807 |
| 2          | rs11893681    | 0.0863309 | 0.116303     | 0.039297617 |
| 5          | rs4642335     | 0.496416  | 0.449949     | 0.039297617 |

Table DS2: All SNPs tested for association (RDC SABP vs. controls) with the Cochran-Armitage trend test and significant at the p=0.05 threshold.

| chromosome | SNP        | MAF_cases | MAF_controls | p_value     |
|------------|------------|-----------|--------------|-------------|
| 11         | rs1375974  | 0.0724638 | 0.10075      | 0.039297617 |
| 1          | rs12130372 | 0.0645161 | 0.091374     | 0.039319439 |
| 2          | rs17048101 | 0.0361011 | 0.0576202    | 0.039319439 |
| 5          | rs10475169 | 0.0902527 | 0.120266     | 0.039319439 |
| 7          | rs2968845  | 0.370968  | 0.327257     | 0.039319439 |
| 8          | rs2515000  | 0.188172  | 0.227257     | 0.039319439 |
| 12         | rs2712657  | 0.302158  | 0.260477     | 0.039319439 |
| 12         | rs12320320 | 0.249104  | 0.291312     | 0.039319439 |
| 18         | rs6506572  | 0.317204  | 0.362181     | 0.039319439 |
| 4          | rs4100737  | 0.370968  | 0.326465     | 0.039341274 |
| 6          | rs910171   | 0.0752688 | 0.0540034    | 0.039341274 |
| 7          | rs17260769 | 0.517921  | 0.470698     | 0.039341274 |
| 10         | rs7917615  | 0.34767   | 0.393356     | 0.039341274 |
| 11         | rs11822105 | 0.214029  | 0.177342     | 0.039341274 |
| 4          | rs10857104 | 0.318996  | 0.276755     | 0.039363122 |
| 8          | rs16939127 | 0.209677  | 0.173713     | 0.039363122 |
| 13         | rs4326932  | 0.526882  | 0.479672     | 0.039363122 |
| 16         | rs12149483 | 0.0917266 | 0.122484     | 0.039363122 |
| 18         | rs9949149  | 0.317204  | 0.362228     | 0.039363122 |
| 2          | rs6706577  | 0.514337  | 0.467736     | 0.039384983 |
| 3          | rs2679805  | 0.0395683 | 0.0616695    | 0.039384983 |
| 4          | rs17239198 | 0.044964  | 0.0681896    | 0.039384983 |
| 5          | rs11739843 | 0.478495  | 0.431005     | 0.039384983 |
| 6          | rs13198269 | 0.255396  | 0.216037     | 0.039384983 |
| 7          | rs7800398  | 0.444444  | 0.491303     | 0.039384983 |
| 15         | rs2200490  | 0.401079  | 0.447736     | 0.039384983 |
| 2          | rs17021908 | 0.11828   | 0.151551     | 0.039406856 |
| 2          | rs6731576  | 0.232014  | 0.193961     | 0.039406856 |
| 6          | rs6910109  | 0.52509   | 0.477853     | 0.039406856 |
| 6          | rs6571108  | 0.181004  | 0.147209     | 0.039406856 |
| 7          | rs12534299 | 0.492806  | 0.445392     | 0.039406856 |
| 9          | rs2026586  | 0.0824373 | 0.111795     | 0.039406856 |
| 1          | rs3795494  | 0.5       | 0.453508     | 0.039428742 |
| 4          | rs12641774 | 0.120504  | 0.0927378    | 0.039428742 |
| 4          | rs10032020 | 0.132616  | 0.167575     | 0.039428742 |
| 7          | rs9690885  | 0.158273  | 0.195674     | 0.039428742 |
| 9          | rs12001366 | 0.046595  | 0.0698229    | 0.039428742 |
| 12         | rs4768777  | 0.292115  | 0.336286     | 0.039428742 |
| 14         | rs2150330  | 0.292115  | 0.33663      | 0.039428742 |
| 22         | rs132873   | 0.17446   | 0.141227     | 0.039428742 |
| 5          | rs1501346  | 0.238351  | 0.200409     | 0.039450641 |
| 7          | rs10229018 | 0.327957  | 0.373632     | 0.039450641 |
| 7          | rs17379465 | 0.341727  | 0.298704     | 0.039450641 |
| 9          | rs4265281  | 0.213262  | 0.177051     | 0.039450641 |
| 10         | rs7090427  | 0.163082  | 0.200204     | 0.039450641 |
| 10         | rs829228   | 0.409747  | 0.45748      | 0.039450641 |
| 21         | rs8132470  | 0.260791  | 0.303444     | 0.039450641 |
| 2          | rs2138380  | 0.157706  | 0.126447     | 0.039472553 |
| 3          | rs7650625  | 0.25      | 0.211506     | 0.039472553 |
| 5          | rs1345777  | 0.324373  | 0.370402     | 0.039472553 |
| 6          | rs9343912  | 0.442652  | 0.396728     | 0.039472553 |
| 8          | rs2719290  | 0.22043   | 0.183413     | 0.039472553 |

Table DS2: All SNPs tested for association (RDC SABP vs. controls) with the Cochran-Armitage trend test and significant at the p=0.05 threshold.

| chromosome | SNP           | MAF_cases | MAF_controls | p_value     |
|------------|---------------|-----------|--------------|-------------|
| 8          | rs10091938    | 0.114695  | 0.0877044    | 0.039472553 |
| 9          | rs4272489     | 0.0523466 | 0.0773038    | 0.039472553 |
| 12         | rs918107      | 0.215054  | 0.178863     | 0.039472553 |
| 13         | rs1756472     | 0.215054  | 0.178888     | 0.039472553 |
| 1          | rs12043295    | 0.292115  | 0.251194     | 0.039494477 |
| 1          | rs3949865     | 0.349462  | 0.394853     | 0.039494477 |
| 5          | SNP_A-1828740 | 0.127698  | 0.0997617    | 0.039494477 |
| 7          | rs7810536     | 0.334532  | 0.380068     | 0.039494477 |
| 10         | rs10159862    | 0.476703  | 0.43013      | 0.039494477 |
| 11         | rs4938653     | 0.0806452 | 0.110014     | 0.039494477 |
| 1          | rs616111      | 0.460573  | 0.41431      | 0.039516414 |
| 1          | rs11264618    | 0.238351  | 0.280143     | 0.039516414 |
| 19         | rs8108157     | 0.397849  | 0.353492     | 0.039516414 |
| 3          | rs339656      | 0.175627  | 0.213824     | 0.039538364 |
| 4          | rs17219704    | 0.214029  | 0.178035     | 0.039538364 |
| 4          | rs6533780     | 0.154122  | 0.19063      | 0.039538364 |
| 5          | rs6596598     | 0.154122  | 0.19063      | 0.039538364 |
| 7          | rs9642434     | 0.0989209 | 0.13062      | 0.039538364 |
| 9          | rs11103291    | 0.299283  | 0.257576     | 0.039538364 |
| 12         | rs6487856     | 0.464158  | 0.417547     | 0.039538364 |
| 13         | rs2329151     | 0.46595   | 0.419789     | 0.039538364 |
| 16         | rs6499515     | 0.422662  | 0.469666     | 0.039538364 |
| 12         | rs11175294    | 0.270609  | 0.230625     | 0.039560327 |
| 14         | rs2403102     | 0.241007  | 0.203439     | 0.039560327 |
| 2          | rs2947960     | 0.383513  | 0.339578     | 0.039582302 |
| 8          | rs4607586     | 0.115523  | 0.0884261    | 0.039582302 |
| 9          | rs4745559     | 0.136691  | 0.106924     | 0.039582302 |
| 11         | rs7117443     | 0.380866  | 0.336227     | 0.039582302 |
| 22         | rs4820229     | 0.360215  | 0.31682      | 0.039582302 |
| 2          | rs2276674     | 0.430108  | 0.477342     | 0.039604291 |
| 5          | rs10069831    | 0.344086  | 0.389854     | 0.039604291 |
| 5          | rs256810      | 0.227599  | 0.190695     | 0.039604291 |
| 5          | rs17080709    | 0.250903  | 0.293776     | 0.039604291 |
| 10         | rs10749223    | 0.0806452 | 0.0580722    | 0.039604291 |
| 11         | rs7128469     | 0.378136  | 0.424991     | 0.039604291 |
| 11         | rs3190331     | 0.417563  | 0.464152     | 0.039604291 |
| 12         | rs11049620    | 0.362007  | 0.318631     | 0.039604291 |
| 14         | rs10131241    | 0.268817  | 0.228868     | 0.039604291 |
| 14         | rs930099      | 0.18638   | 0.15247      | 0.039604291 |
| 19         | rs7259569     | 0.139785  | 0.175298     | 0.039604291 |
| 8          | rs2469395     | 0.0519713 | 0.0766997    | 0.039626292 |
| 15         | rs2899383     | 0.419355  | 0.374361     | 0.039626292 |
| 17         | rs7221886     | 0.415162  | 0.461919     | 0.039626292 |
| 1          | rs3767101     | 0.116906  | 0.0896387    | 0.039648306 |
| 3          | rs4530555     | 0.188849  | 0.154738     | 0.039648306 |
| 7          | rs13239220    | 0.410394  | 0.456997     | 0.039648306 |
| 7          | rs1691210     | 0.528674  | 0.482259     | 0.039648306 |
| 7          | rs10954431    | 0.491039  | 0.443952     | 0.039648306 |
| 11         | rs202675      | 0.25      | 0.291965     | 0.039648306 |
| 16         | rs2269767     | 0.135379  | 0.170865     | 0.039648306 |
| 16         | rs8051241     | 0.21147   | 0.175307     | 0.039648306 |
| 16         | rs6500457     | 0.448029  | 0.402589     | 0.039648306 |

Table DS2: All SNPs tested for association (RDC SABP vs. controls) with the Cochran-Armitage trend test and significant at the p=0.05 threshold.

| chromosome | SNP        | MAF_cases | MAF_controls | p_value     |
|------------|------------|-----------|--------------|-------------|
| 20         | rs3003137  | 0.483813  | 0.437138     | 0.039648306 |
| 1          | rs2185341  | 0.33871   | 0.29554      | 0.039670333 |
| 4          | rs10517390 | 0.149819  | 0.186305     | 0.039670333 |
| 5          | rs257098   | 0.273381  | 0.233731     | 0.039670333 |
| 5          | rs2963921  | 0.408273  | 0.362815     | 0.039670333 |
| 6          | rs1333227  | 0.22482   | 0.266428     | 0.039670333 |
| 8          | rs2958757  | 0.0860215 | 0.0630324    | 0.039670333 |
| 10         | rs2210673  | 0.16787   | 0.205722     | 0.039670333 |
| 13         | rs9585593  | 0.185252  | 0.224719     | 0.039670333 |
| 17         | rs12150079 | 0.370968  | 0.327093     | 0.039670333 |
| 18         | rs9964067  | 0.360215  | 0.316184     | 0.039670333 |
| 1          | rs1886306  | 0.164875  | 0.132834     | 0.039692372 |
| 7          | rs6950526  | 0.184588  | 0.150664     | 0.039692372 |
| 4          | rs6821889  | 0.28853   | 0.247531     | 0.039714425 |
| 4          | rs12499508 | 0.507168  | 0.459625     | 0.039714425 |
| 6          | rs6913879  | 0.227599  | 0.268929     | 0.039714425 |
| 7          | rs2430022  | 0.537634  | 0.490971     | 0.039714425 |
| 9          | rs12339210 | 0.143369  | 0.113721     | 0.039714425 |
| 10         | rs6584631  | 0.207885  | 0.248464     | 0.039714425 |
| 14         | rs10134871 | 0.207885  | 0.248382     | 0.039714425 |
| 20         | rs6082361  | 0.379928  | 0.335778     | 0.039714425 |
| 2          | rs16985374 | 0.132616  | 0.167235     | 0.03973649  |
| 3          | rs1396293  | 0.299283  | 0.258438     | 0.03973649  |
| 7          | rs17257433 | 0.439068  | 0.485179     | 0.03973649  |
| 8          | rs1482209  | 0.0469314 | 0.0708675    | 0.03973649  |
| 11         | rs10501330 | 0.435252  | 0.482106     | 0.03973649  |
| 11         | rs563202   | 0.11828   | 0.151448     | 0.03973649  |
| 13         | rs882970   | 0.144404  | 0.114413     | 0.03973649  |
| 13         | rs1324870  | 0.451613  | 0.498298     | 0.03973649  |
| 14         | rs175071   | 0.507168  | 0.460266     | 0.03973649  |
| 15         | rs11854673 | 0.140794  | 0.176491     | 0.03973649  |
| 15         | rs12914795 | 0.0878136 | 0.117978     | 0.03973649  |
| 2          | rs6749805  | 0.204301  | 0.244281     | 0.039758568 |
| 4          | rs1358229  | 0.419355  | 0.466758     | 0.039758568 |
| 5          | rs11134453 | 0.363799  | 0.410226     | 0.039758568 |
| 9          | rs3750552  | 0.296763  | 0.25554      | 0.039758568 |
| 12         | rs1496251  | 0.455036  | 0.501875     | 0.039758568 |
| 1          | rs10889671 | 0.09319   | 0.123551     | 0.039780659 |
| 2          | rs6719635  | 0.0740072 | 0.052506     | 0.039780659 |
| 3          | rs743757   | 0.111111  | 0.14349      | 0.039780659 |
| 9          | rs7849770  | 0.348921  | 0.30566      | 0.039780659 |
| 10         | rs10906026 | 0.269784  | 0.229905     | 0.039780659 |
| 10         | rs4749580  | 0.375899  | 0.422381     | 0.039780659 |
| 13         | rs16962820 | 0.139785  | 0.110239     | 0.039780659 |
| 6          | rs10485408 | 0.181004  | 0.147429     | 0.039802763 |
| 8          | rs1395614  | 0.0734767 | 0.101365     | 0.039802763 |
| 13         | rs9597506  | 0.100358  | 0.0752981    | 0.039802763 |
| 14         | rs2401898  | 0.182796  | 0.149132     | 0.039802763 |
| 17         | rs4985683  | 0.114695  | 0.0883055    | 0.039802763 |
| 10         | rs1490172  | 0.308664  | 0.266815     | 0.03982488  |
| 12         | rs11067030 | 0.213262  | 0.177183     | 0.03982488  |
| 18         | rs2036936  | 0.379928  | 0.33515      | 0.03982488  |

Table DS2: All SNPs tested for association (RDC SABP vs. controls) with the Cochran-Armitage trend test and significant at the p=0.05 threshold.

| chromosome | SNP        | MAF_cases | MAF_controls | p_value     |
|------------|------------|-----------|--------------|-------------|
| 3          | rs291945   | 0.0394265 | 0.0614754    | 0.03984701  |
| 6          | rs17198823 | 0.197133  | 0.162628     | 0.03984701  |
| 8          | rs2047378  | 0.453237  | 0.50017      | 0.03984701  |
| 11         | rs6589297  | 0.322581  | 0.279952     | 0.03984701  |
| 14         | rs6571636  | 0.435484  | 0.389608     | 0.03984701  |
| 14         | rs11159080 | 0.437276  | 0.483992     | 0.03984701  |
| 14         | rs10133718 | 0.258065  | 0.219059     | 0.03984701  |
| 15         | rs12908208 | 0.252708  | 0.296176     | 0.03984701  |
| 19         | rs1813234  | 0.324373  | 0.281623     | 0.03984701  |
| 2          | rs340514   | 0.473118  | 0.426185     | 0.039869153 |
| 5          | rs6556507  | 0.125899  | 0.160143     | 0.039869153 |
| 8          | rs10107515 | 0.154122  | 0.190565     | 0.039869153 |
| 12         | rs12579393 | 0.198556  | 0.163761     | 0.039869153 |
| 3          | rs9830204  | 0.354839  | 0.310903     | 0.039891308 |
| 3          | rs10934387 | 0.155914  | 0.12483      | 0.039891308 |
| 4          | rs1022247  | 0.281362  | 0.325094     | 0.039891308 |
| 4          | rs7655646  | 0.310036  | 0.268143     | 0.039891308 |
| 4          | rs1356672  | 0.216846  | 0.258174     | 0.039891308 |
| 13         | rs2785497  | 0.393116  | 0.440342     | 0.039891308 |
| 13         | rs17446175 | 0.449821  | 0.496422     | 0.039891308 |
| 16         | rs11644822 | 0.350719  | 0.397445     | 0.039891308 |
| 16         | rs7189970  | 0.304348  | 0.349131     | 0.039891308 |
| 18         | rs7239952  | 0.360215  | 0.316229     | 0.039891308 |
| 2          | rs840879   | 0.448029  | 0.401363     | 0.039913477 |
| 3          | rs963158   | 0.53777   | 0.490788     | 0.039913477 |
| 10         | rs10906425 | 0.224014  | 0.187777     | 0.039913477 |
| 1          | rs7539380  | 0.141577  | 0.177062     | 0.039935658 |
| 2          | rs7582294  | 0.308244  | 0.266349     | 0.039935658 |
| 10         | rs11012274 | 0.207885  | 0.248467     | 0.039935658 |
| 1          | rs10926514 | 0.341727  | 0.387734     | 0.039957852 |
| 2          | rs12711663 | 0.138989  | 0.109007     | 0.039957852 |
| 4          | rs4696259  | 0.396057  | 0.44257      | 0.039957852 |
| 5          | rs7709790  | 0.216846  | 0.180641     | 0.039957852 |
| 5          | rs257063   | 0.222222  | 0.26314      | 0.039957852 |
| 6          | rs9451480  | 0.265343  | 0.308612     | 0.039957852 |
| 10         | rs637440   | 0.322581  | 0.367918     | 0.039957852 |
| 12         | rs12579775 | 0.062724  | 0.0889267    | 0.039957852 |
| 3          | rs164336   | 0.134892  | 0.169792     | 0.03998006  |
| 11         | rs2067043  | 0.336918  | 0.294007     | 0.03998006  |
| 11         | rs2467092  | 0.120072  | 0.153256     | 0.03998006  |
| 11         | rs4121759  | 0.0430108 | 0.0659284    | 0.03998006  |
| 18         | rs1035207  | 0.44086   | 0.487564     | 0.03998006  |
| 20         | rs4815041  | 0.32491   | 0.282475     | 0.03998006  |
| 22         | rs2157252  | 0.360215  | 0.316865     | 0.03998006  |
| 8          | rs933114   | 0.370968  | 0.417036     | 0.04000228  |
| 8          | rs2289889  | 0.406137  | 0.453397     | 0.04000228  |
| 12         | rs11615637 | 0.213262  | 0.177222     | 0.04000228  |
| 17         | rs8076067  | 0.203237  | 0.1682       | 0.04000228  |
| 19         | rs1064267  | 0.15233   | 0.188824     | 0.04000228  |
| 22         | rs10854865 | 0.200717  | 0.165416     | 0.04000228  |
| 1          | rs16852801 | 0.0881295 | 0.117888     | 0.040024513 |
| 5          | rs16874709 | 0.124549  | 0.158549     | 0.040024513 |



Table DS2: All SNPs tested for association (RDC SABP vs. controls) with the Cochran-Armitage trend test and significant at the p=0.05 threshold.

| chromosome | SNP        | MAF_cases | MAF_controls | p_value     |
|------------|------------|-----------|--------------|-------------|
| 5          | rs2366837  | 0.390681  | 0.437095     | 0.040024513 |
| 11         | rs3824898  | 0.389892  | 0.345315     | 0.040024513 |
| 17         | rs12949718 | 0.359712  | 0.315807     | 0.040024513 |
| 7          | rs12531559 | 0.259857  | 0.303309     | 0.040046759 |
| 21         | rs16992859 | 0.044964  | 0.0681663    | 0.040046759 |
| 4          | rs12501731 | 0.335125  | 0.292135     | 0.040069018 |
| 4          | rs1540474  | 0.370968  | 0.326635     | 0.040069018 |
| 16         | rs1079926  | 0.224014  | 0.18718      | 0.040069018 |
| 19         | rs10408343 | 0.102888  | 0.0775128    | 0.040069018 |
| 5          | rs12514616 | 0.249097  | 0.292121     | 0.040091291 |
| 7          | rs17133377 | 0.100719  | 0.0756646    | 0.040091291 |
| 9          | rs9408714  | 0.453405  | 0.499659     | 0.040091291 |
| 11         | rs4296033  | 0.150538  | 0.119665     | 0.040091291 |
| 15         | rs2939850  | 0.222222  | 0.263194     | 0.040091291 |
| 16         | rs4616298  | 0.415771  | 0.462679     | 0.040091291 |
| 5          | rs9292617  | 0.284946  | 0.329073     | 0.040113576 |
| 6          | rs17209741 | 0.360215  | 0.316865     | 0.040113576 |
| 6          | rs9400409  | 0.27957   | 0.239747     | 0.040113576 |
| 7          | rs2240026  | 0.0394265 | 0.0617305    | 0.040113576 |
| 7          | rs7782175  | 0.464158  | 0.418114     | 0.040113576 |
| 8          | rs800558   | 0.165468  | 0.202997     | 0.040113576 |
| 10         | rs2670220  | 0.292115  | 0.336286     | 0.040113576 |
| 11         | rs3829259  | 0.351254  | 0.308243     | 0.040113576 |
| 12         | rs12823591 | 0.125448  | 0.0973783    | 0.040113576 |
| 18         | rs6506332  | 0.496416  | 0.449915     | 0.040113576 |
| 21         | rs962788   | 0.374552  | 0.33083      | 0.040113576 |
| 6          | rs17284939 | 0.18638   | 0.225136     | 0.040135874 |
| 10         | rs2505453  | 0.268817  | 0.229564     | 0.040135874 |
| 2          | rs2685695  | 0.383513  | 0.339687     | 0.040158185 |
| 3          | rs7639020  | 0.0842294 | 0.113969     | 0.040158185 |
| 4          | rs2110152  | 0.275986  | 0.31891      | 0.040158185 |
| 7          | rs10488021 | 0.122302  | 0.155888     | 0.040158185 |
| 1          | rs6682659  | 0.376344  | 0.423025     | 0.040180509 |
| 5          | rs11745357 | 0.129032  | 0.163602     | 0.040180509 |
| 5          | rs6449503  | 0.438628  | 0.485495     | 0.040180509 |
| 5          | rs4700423  | 0.309353  | 0.267565     | 0.040180509 |
| 11         | rs1715263  | 0.120072  | 0.153218     | 0.040180509 |
| 5          | rs17523221 | 0.0899281 | 0.12015      | 0.040202846 |
| 11         | rs4757568  | 0.302867  | 0.347085     | 0.040202846 |
| 14         | rs11997    | 0.197842  | 0.162747     | 0.040202846 |
| 18         | rs1893271  | 0.281362  | 0.324813     | 0.040202846 |
| 6          | rs628428   | 0.236559  | 0.19891      | 0.040225197 |
| 6          | rs2566833  | 0.249104  | 0.29161      | 0.040225197 |
| 6          | rs6940459  | 0.333333  | 0.379052     | 0.040225197 |
| 8          | rs4570167  | 0.318996  | 0.364349     | 0.040225197 |
| 8          | rs10875467 | 0.365591  | 0.412326     | 0.040225197 |
| 9          | rs6477140  | 0.399642  | 0.354273     | 0.040225197 |
| 10         | rs2260179  | 0.268817  | 0.312628     | 0.040225197 |
| 21         | rs233275   | 0.417563  | 0.464261     | 0.040225197 |
| 2          | rs7558412  | 0.178058  | 0.144908     | 0.04024756  |
| 3          | rs1919986  | 0.0430108 | 0.0661664    | 0.04024756  |
| 3          | rs1608107  | 0.455036  | 0.501367     | 0.04024756  |

Table DS2 All SNPs tested for association (RDC SABP vs. controls) with the Cochran-Armitage trend test and significant at the p=0.05 threshold.

| chromosome | SNP        | MAF_cases | MAF_controls | p_value     |
|------------|------------|-----------|--------------|-------------|
| 4          | rs6448565  | 0.150538  | 0.186521     | 0.04024756  |
| 11         | rs12420681 | 0.136691  | 0.107362     | 0.04024756  |
| 11         | rs535831   | 0.292115  | 0.336007     | 0.04024756  |
| 15         | rs8030999  | 0.132616  | 0.103307     | 0.04024756  |
| 16         | rs1350888  | 0.405018  | 0.451057     | 0.04024756  |
| 18         | rs1866985  | 0.321942  | 0.279707     | 0.04024756  |
| 1          | rs2095785  | 0.28853   | 0.33197      | 0.040269936 |
| 5          | rs10075648 | 0.283394  | 0.327545     | 0.040269936 |
| 8          | rs7815471  | 0.410394  | 0.45724      | 0.040269936 |
| 3          | rs6805781  | 0.442652  | 0.397204     | 0.040292325 |
| 6          | rs12197213 | 0.120072  | 0.153374     | 0.040292325 |
| 8          | rs4557669  | 0.210432  | 0.251618     | 0.040292325 |
| 9          | rs11142636 | 0.253597  | 0.214991     | 0.040292325 |
| 11         | rs4757718  | 0.392473  | 0.347856     | 0.040292325 |
| 15         | rs1074390  | 0.365108  | 0.411584     | 0.040292325 |
| 18         | rs1948617  | 0.517986  | 0.47118      | 0.040292325 |
| 1          | rs1599970  | 0.0806452 | 0.109274     | 0.040314728 |
| 2          | rs1584832  | 0.33871   | 0.296422     | 0.040314728 |
| 2          | rs1922625  | 0.0971223 | 0.128288     | 0.040314728 |
| 6          | rs6902889  | 0.383094  | 0.428839     | 0.040314728 |
| 8          | rs1007206  | 0.482079  | 0.435627     | 0.040314728 |
| 12         | rs12823875 | 0.455036  | 0.409478     | 0.040314728 |
| 12         | rs4762016  | 0.200717  | 0.165702     | 0.040314728 |
| 13         | rs9318627  | 0.360215  | 0.406537     | 0.040314728 |
| 5          | rs1478487  | 0.419355  | 0.466304     | 0.040337143 |
| 5          | rs10073753 | 0.243728  | 0.285763     | 0.040337143 |
| 9          | rs4978005  | 0.413669  | 0.460163     | 0.040337143 |
| 10         | rs2184578  | 0.105735  | 0.079918     | 0.040337143 |
| 13         | rs9597505  | 0.0971223 | 0.0728918    | 0.040337143 |
| 15         | rs16971950 | 0.0913978 | 0.0673602    | 0.040337143 |
| 16         | rs1580765  | 0.324373  | 0.369714     | 0.040337143 |
| 21         | rs229352   | 0.327957  | 0.373467     | 0.040337143 |
| 2          | rs17040704 | 0.12724   | 0.161614     | 0.040359572 |
| 2          | rs778184   | 0.397849  | 0.444596     | 0.040359572 |
| 2          | rs11893486 | 0.439068  | 0.39349      | 0.040359572 |
| 11         | rs637131   | 0.125448  | 0.0972743    | 0.040359572 |
| 13         | rs912639   | 0.451264  | 0.497956     | 0.040359572 |
| 2          | rs17385675 | 0.0996377 | 0.0750597    | 0.040382014 |
| 4          | rs2232029  | 0.116906  | 0.149506     | 0.040382014 |
| 11         | rs11041095 | 0.217626  | 0.181073     | 0.040382014 |
| 17         | rs202120   | 0.225806  | 0.267723     | 0.040382014 |
| 1          | rs10863918 | 0.444444  | 0.491485     | 0.040404468 |
| 3          | rs17047073 | 0.433692  | 0.3873       | 0.040404468 |
| 3          | rs16849514 | 0.116906  | 0.0898704    | 0.040404468 |
| 7          | rs1918422  | 0.0842294 | 0.113629     | 0.040404468 |
| 12         | rs771963   | 0.150538  | 0.187032     | 0.040404468 |
| 15         | rs3784397  | 0.417563  | 0.372572     | 0.040404468 |
| 16         | rs205148   | 0.197842  | 0.237738     | 0.040404468 |
| 1          | rs7546959  | 0.444444  | 0.491491     | 0.040426936 |
| 2          | rs17324208 | 0.175627  | 0.213726     | 0.040426936 |
| 3          | rs6441863  | 0.18638   | 0.152759     | 0.040426936 |
| 3          | rs12492113 | 0.0967742 | 0.127638     | 0.040426936 |

Table DS2 All SNPs tested for association (RDC SABP vs. controls) with the Cochran-Armitage trend test and significant at the p=0.05 threshold.

| chromosome | SNP        | MAF_cases | MAF_controls | p_value     |
|------------|------------|-----------|--------------|-------------|
| 8          | rs10100859 | 0.521583  | 0.474403     | 0.040426936 |
| 10         | rs2117795  | 0.145683  | 0.181617     | 0.040426936 |
| 11         | rs1562445  | 0.25448   | 0.215917     | 0.040426936 |
| 15         | rs3784722  | 0.259857  | 0.302215     | 0.040426936 |
| 19         | rs7255649  | 0.16129   | 0.129775     | 0.040426936 |
| 3          | rs6599244  | 0.136201  | 0.107155     | 0.040449417 |
| 4          | rs1477544  | 0.438849  | 0.393356     | 0.040449417 |
| 10         | rs2126747  | 0.234767  | 0.197409     | 0.040449417 |
| 12         | rs740743   | 0.362007  | 0.318399     | 0.040449417 |
| 16         | rs7188213  | 0.357914  | 0.403033     | 0.040449417 |
| 18         | rs7227668  | 0.293165  | 0.337879     | 0.040449417 |
| 5          | rs835079   | 0.11828   | 0.151618     | 0.040471912 |
| 7          | rs2974939  | 0.370968  | 0.32748      | 0.040471912 |
| 13         | rs1888241  | 0.417266  | 0.4642       | 0.040471912 |
| 1          | rs11591084 | 0.387097  | 0.432902     | 0.040494419 |
| 4          | rs989396   | 0.100358  | 0.0753752    | 0.040494419 |
| 4          | rs10009617 | 0.231183  | 0.273161     | 0.040494419 |
| 10         | rs10882293 | 0.510791  | 0.464383     | 0.040494419 |
| 15         | rs896614   | 0.38172   | 0.428182     | 0.040494419 |
| 5          | rs16890002 | 0.073741  | 0.0525418    | 0.040516939 |
| 7          | rs6459861  | 0.0340502 | 0.0550239    | 0.040516939 |
| 11         | rs11215719 | 0.259857  | 0.30303      | 0.040516939 |
| 13         | rs1028770  | 0.451613  | 0.498125     | 0.040516939 |
| 2          | rs17039375 | 0.0860215 | 0.115555     | 0.040539473 |
| 2          | rs7370609  | 0.344086  | 0.301158     | 0.040539473 |
| 8          | rs7819427  | 0.120072  | 0.153545     | 0.040539473 |
| 9          | rs1387595  | 0.413043  | 0.459713     | 0.040539473 |
| 19         | rs2571051  | 0.390681  | 0.437138     | 0.040539473 |
| 1          | rs10429877 | 0.134409  | 0.169278     | 0.040562019 |
| 2          | rs3948117  | 0.192446  | 0.157868     | 0.040562019 |
| 5          | rs12654884 | 0.507246  | 0.459741     | 0.040562019 |
| 5          | rs964541   | 0.478495  | 0.43205      | 0.040562019 |
| 6          | rs4959648  | 0.456835  | 0.502724     | 0.040562019 |
| 6          | rs3800270  | 0.0917266 | 0.121893     | 0.040562019 |
| 9          | rs984531   | 0.482079  | 0.435539     | 0.040562019 |
| 12         | rs1021887  | 0.521505  | 0.474957     | 0.040562019 |
| 13         | rs2258368  | 0.134409  | 0.105389     | 0.040562019 |
| 14         | rs1949560  | 0.535842  | 0.48926      | 0.040562019 |
| 6          | rs7745185  | 0.0755396 | 0.103783     | 0.040584579 |
| 7          | rs2909483  | 0.426259  | 0.472733     | 0.040584579 |
| 10         | rs10886291 | 0.28853   | 0.332367     | 0.040584579 |
| 15         | rs1026759  | 0.383513  | 0.339639     | 0.040584579 |
| 22         | rs2157254  | 0.360215  | 0.317036     | 0.040584579 |
| 7          | rs6947204  | 0.439068  | 0.485014     | 0.040607152 |
| 8          | rs1500899  | 0.275986  | 0.319761     | 0.040607152 |
| 20         | rs2268916  | 0.360215  | 0.31682      | 0.040607152 |
| 2          | rs10197757 | 0.360215  | 0.406165     | 0.040629739 |
| 20         | rs6093059  | 0.276173  | 0.319501     | 0.040629739 |
| 4          | rs1470280  | 0.392086  | 0.43848      | 0.040652338 |
| 6          | rs17073012 | 0.177419  | 0.144001     | 0.040652338 |
| 7          | rs4948003  | 0.311828  | 0.270514     | 0.040652338 |
| 8          | rs1350681  | 0.285971  | 0.245653     | 0.040652338 |

Table DS2: All SNPs tested for association (RDC SABP vs. controls) with the Cochran-Armitage trend test and significant at the p=0.05 threshold.

| chromosome | SNP        | MAF_cases | MAF_controls | p_value     |
|------------|------------|-----------|--------------|-------------|
| 13         | rs9553711  | 0.394265  | 0.440545     | 0.040652338 |
| 14         | rs12887886 | 0.308244  | 0.352691     | 0.040652338 |
| 15         | rs898126   | 0.155914  | 0.19295      | 0.040652338 |
| 16         | rs4887786  | 0.0938628 | 0.0695534    | 0.040652338 |
| 1          | rs4655141  | 0.134409  | 0.169226     | 0.040674951 |
| 1          | rs17609581 | 0.0896057 | 0.120014     | 0.040674951 |
| 6          | rs10484314 | 0.363799  | 0.319795     | 0.040674951 |
| 6          | rs565685   | 0.283154  | 0.243188     | 0.040674951 |
| 12         | rs7954946  | 0.388889  | 0.435242     | 0.040674951 |
| 13         | rs9574187  | 0.25448   | 0.297546     | 0.040674951 |
| 16         | rs9925751  | 0.251799  | 0.213361     | 0.040674951 |
| 18         | rs306219   | 0.170251  | 0.207865     | 0.040674951 |
| 7          | rs17280671 | 0.118705  | 0.151789     | 0.040697577 |
| 7          | rs11765868 | 0.28777   | 0.331175     | 0.040720216 |
| 10         | rs7100461  | 0.0483871 | 0.0723797    | 0.040720216 |
| 12         | rs7488564  | 0.268817  | 0.229067     | 0.040720216 |
| 16         | rs1809784  | 0.214029  | 0.177914     | 0.040720216 |
| 2          | rs9287852  | 0.430108  | 0.384366     | 0.040742868 |
| 6          | rs1923380  | 0.275986  | 0.235955     | 0.040742868 |
| 14         | rs10138916 | 0.401434  | 0.448141     | 0.040742868 |
| 15         | rs7175099  | 0.370968  | 0.327486     | 0.040742868 |
| 16         | rs8062350  | 0.33871   | 0.29571      | 0.040742868 |
| 16         | rs12325417 | 0.274194  | 0.317655     | 0.040742868 |
| 22         | rs1076299  | 0.278777  | 0.238323     | 0.040742868 |
| 1          | rs774139   | 0.145683  | 0.115123     | 0.040765533 |
| 7          | rs2342497  | 0.11828   | 0.151396     | 0.040765533 |
| 7          | rs6971638  | 0.523297  | 0.476109     | 0.040765533 |
| 7          | rs6966038  | 0.215054  | 0.178827     | 0.040765533 |
| 8          | rs11776404 | 0.0519713 | 0.0761612    | 0.040765533 |
| 8          | rs7839996  | 0.198556  | 0.238323     | 0.040765533 |
| 11         | rs7936908  | 0.120072  | 0.153374     | 0.040765533 |
| 14         | rs7140886  | 0.402878  | 0.357751     | 0.040765533 |
| 3          | rs6803450  | 0.229391  | 0.27045      | 0.040788212 |
| 3          | rs3906013  | 0.206835  | 0.246253     | 0.040788212 |
| 4          | rs902649   | 0.526882  | 0.480566     | 0.040788212 |
| 4          | rs1036722  | 0.311828  | 0.270201     | 0.040788212 |
| 12         | rs4964248  | 0.223827  | 0.265838     | 0.040788212 |
| 6          | rs6920099  | 0.360215  | 0.405451     | 0.040810904 |
| 6          | rs16877011 | 0.141577  | 0.11149      | 0.040810904 |
| 13         | rs9527779  | 0.397112  | 0.44295      | 0.040810904 |
| 15         | rs4778264  | 0.163082  | 0.200204     | 0.040810904 |
| 1          | rs3765962  | 0.263441  | 0.305973     | 0.040833609 |
| 2          | rs10176594 | 0.428315  | 0.474778     | 0.040833609 |
| 3          | rs2367598  | 0.397482  | 0.444254     | 0.040833609 |
| 3          | rs3107329  | 0.210432  | 0.174165     | 0.040833609 |
| 3          | rs1021531  | 0.246403  | 0.288147     | 0.040833609 |
| 7          | rs10224816 | 0.134892  | 0.106267     | 0.040833609 |
| 11         | rs2226602  | 0.272401  | 0.232265     | 0.040833609 |
| 1          | rs10127938 | 0.18638   | 0.22546      | 0.040856328 |
| 5          | rs6450359  | 0.133094  | 0.104394     | 0.040856328 |
| 13         | rs7321832  | 0.194245  | 0.23372      | 0.040856328 |
| 2          | rs10187085 | 0.073741  | 0.0522998    | 0.04087906  |

Table DS2All SNPs tested for association (RDC SABP vs. controls) with the Cochran-Armitage trend test and significant at the p=0.05 threshold.

| chromosome | SNP           | MAF_cases | MAF_controls | p_value     |
|------------|---------------|-----------|--------------|-------------|
| 4          | rs17002418    | 0.0394265 | 0.0614125    | 0.04087906  |
| 6          | rs9403310     | 0.353047  | 0.398943     | 0.04087906  |
| 11         | rs10835533    | 0.204301  | 0.169052     | 0.04087906  |
| 12         | rs7961265     | 0.258993  | 0.220123     | 0.04087906  |
| 13         | rs12428032    | 0.100358  | 0.0754685    | 0.04087906  |
| 15         | rs11856537    | 0.399642  | 0.355586     | 0.04087906  |
| 18         | rs1352033     | 0.255396  | 0.298228     | 0.04087906  |
| 1          | rs10754729    | 0.31362   | 0.358237     | 0.040901805 |
| 4          | rs6834624     | 0.320789  | 0.365529     | 0.040901805 |
| 6          | rs3997653     | 0.435252  | 0.390327     | 0.040901805 |
| 7          | rs7796052     | 0.267986  | 0.228049     | 0.040901805 |
| 8          | rs16936692    | 0.0824373 | 0.0596049    | 0.040901805 |
| 14         | rs10135787    | 0.231183  | 0.272557     | 0.040901805 |
| 1          | rs1333029     | 0.0555556 | 0.0810075    | 0.040924563 |
| 5          | rs6890519     | 0.132616  | 0.104053     | 0.040924563 |
| 13         | rs9538575     | 0.218638  | 0.258856     | 0.040924563 |
| 2          | rs10165224    | 0.170251  | 0.208106     | 0.040947335 |
| 2          | rs1026076     | 0.419355  | 0.466235     | 0.040947335 |
| 2          | rs4664187     | 0.298561  | 0.342473     | 0.040947335 |
| 5          | rs12659597    | 0.177419  | 0.215162     | 0.040947335 |
| 6          | rs3849797     | 0.0985663 | 0.12934      | 0.040947335 |
| 7          | rs12531628    | 0.215054  | 0.25631      | 0.040947335 |
| 7          | rs10954328    | 0.168459  | 0.13624      | 0.040947335 |
| 10         | rs10886927    | 0.356631  | 0.402352     | 0.040947335 |
| 2          | rs6712838     | 0.5       | 0.453136     | 0.04097012  |
| 4          | rs2083136     | 0.370968  | 0.326805     | 0.04097012  |
| 6          | SNP_A-1986633 | 0.0949821 | 0.0706503    | 0.04097012  |
| 9          | rs2518116     | 0.505376  | 0.458645     | 0.04097012  |
| 11         | rs7934696     | 0.0485612 | 0.0719412    | 0.04097012  |
| 1          | rs10888795    | 0.27957   | 0.323389     | 0.040992918 |
| 5          | SNP_A-2267538 | 0.0985663 | 0.0739353    | 0.040992918 |
| 10         | rs7912102     | 0.209677  | 0.250085     | 0.040992918 |
| 13         | rs3128055     | 0.460573  | 0.414905     | 0.040992918 |
| 15         | rs351214      | 0.145161  | 0.18047      | 0.040992918 |
| 19         | rs285685      | 0.226619  | 0.189608     | 0.040992918 |
| 20         | rs6071880     | 0.202509  | 0.167462     | 0.040992918 |
| 1          | rs12029094    | 0.344086  | 0.390194     | 0.04101573  |
| 2          | rs6705746     | 0.439068  | 0.393563     | 0.04101573  |
| 3          | rs6772598     | 0.227599  | 0.269336     | 0.04101573  |
| 5          | rs1830169     | 0.180505  | 0.219412     | 0.04101573  |
| 8          | rs17635381    | 0.170251  | 0.138055     | 0.04101573  |
| 9          | rs11143958    | 0.291367  | 0.335264     | 0.04101573  |
| 11         | rs4363616     | 0.286738  | 0.330436     | 0.04101573  |
| 13         | rs9585570     | 0.190647  | 0.229983     | 0.04101573  |
| 16         | rs12716974    | 0.483871  | 0.437819     | 0.04101573  |
| 18         | rs7407129     | 0.394265  | 0.349182     | 0.04101573  |
| 18         | rs11152170    | 0.501792  | 0.455521     | 0.04101573  |
| 18         | rs8091123     | 0.507194  | 0.46028      | 0.04101573  |
| 20         | rs527158      | 0.458781  | 0.412799     | 0.04101573  |
| 1          | rs6672092     | 0.259857  | 0.303072     | 0.041038555 |
| 2          | rs6753187     | 0.507168  | 0.461001     | 0.041038555 |
| 6          | rs9492436     | 0.0752688 | 0.103202     | 0.041038555 |

Table DS2 All SNPs tested for association (RDC SABP vs. controls) with the Cochran-Armitage trend test and significant at the p=0.05 threshold.

| chromosome | SNP        | MAF_cases | MAF_controls | p_value     |
|------------|------------|-----------|--------------|-------------|
| 8          | rs985276   | 0.0557554 | 0.0810304    | 0.041038555 |
| 11         | rs10898026 | 0.109712  | 0.14176      | 0.041038555 |
| 11         | rs11223714 | 0.109712  | 0.1422       | 0.041038555 |
| 15         | rs12898934 | 0.189964  | 0.228698     | 0.041038555 |
| 15         | rs6494290  | 0.421147  | 0.467802     | 0.041038555 |
| 19         | rs10412267 | 0.0913978 | 0.0679959    | 0.041038555 |
| 19         | rs1401926  | 0.517986  | 0.470708     | 0.041038555 |
| 21         | rs1452093  | 0.345878  | 0.391238     | 0.041038555 |
| 1          | rs12744540 | 0.275986  | 0.318924     | 0.041061393 |
| 4          | rs11098343 | 0.332734  | 0.378065     | 0.041061393 |
| 10         | rs12569589 | 0.33935   | 0.384157     | 0.041061393 |
| 12         | rs4765412  | 0.0698925 | 0.0969336    | 0.041061393 |
| 21         | rs2839187  | 0.155914  | 0.124915     | 0.041061393 |
| 3          | rs9825263  | 0.415771  | 0.370654     | 0.041084244 |
| 4          | rs13105340 | 0.321942  | 0.279768     | 0.041084244 |
| 5          | rs1990201  | 0.518051  | 0.471881     | 0.041084244 |
| 6          | rs8180595  | 0.252688  | 0.295571     | 0.041084244 |
| 8          | rs1504752  | 0.157706  | 0.126192     | 0.041084244 |
| 8          | rs6578002  | 0.464158  | 0.418284     | 0.041084244 |
| 11         | rs11217100 | 0.433453  | 0.387978     | 0.041084244 |
| 13         | rs9541533  | 0.0896057 | 0.0662692    | 0.041084244 |
| 2          | rs1434189  | 0.345878  | 0.391008     | 0.041107109 |
| 5          | rs1477358  | 0.451613  | 0.498292     | 0.041107109 |
| 6          | rs6899580  | 0.382671  | 0.42935      | 0.041107109 |
| 6          | rs9351605  | 0.357914  | 0.403715     | 0.041107109 |
| 9          | rs1853252  | 0.248201  | 0.290531     | 0.041107109 |
| 9          | rs11103281 | 0.078853  | 0.1078       | 0.041107109 |
| 12         | rs3181301  | 0.537634  | 0.490634     | 0.041107109 |
| 13         | rs1186157  | 0.301075  | 0.259537     | 0.041107109 |
| 1          | rs6427900  | 0.112903  | 0.145123     | 0.041129988 |
| 9          | rs1360681  | 0.343525  | 0.389683     | 0.041129988 |
| 12         | rs1873154  | 0.383513  | 0.339353     | 0.041129988 |
| 13         | rs9565411  | 0.326715  | 0.284545     | 0.041129988 |
| 15         | rs7169459  | 0.214029  | 0.254688     | 0.041129988 |
| 17         | rs1868826  | 0.204301  | 0.169506     | 0.041129988 |
| 21         | rs2837970  | 0.408602  | 0.364101     | 0.041129988 |
| 1          | rs12142980 | 0.370968  | 0.416411     | 0.041152879 |
| 1          | rs16833356 | 0.0394265 | 0.0615201    | 0.041152879 |
| 2          | rs7594951  | 0.073741  | 0.101978     | 0.041152879 |
| 4          | rs17058876 | 0.480287  | 0.433959     | 0.041152879 |
| 8          | rs12543764 | 0.215827  | 0.179775     | 0.041152879 |
| 9          | rs10981407 | 0.268953  | 0.230075     | 0.041152879 |
| 12         | rs1022232  | 0.123656  | 0.157294     | 0.041152879 |
| 12         | rs17802054 | 0.324373  | 0.36895      | 0.041152879 |
| 12         | rs952464   | 0.23741   | 0.278781     | 0.041152879 |
| 20         | rs17408919 | 0.190647  | 0.229067     | 0.041152879 |
| 1          | rs4908327  | 0.142086  | 0.112474     | 0.041175785 |
| 2          | rs17040234 | 0.143369  | 0.113877     | 0.041175785 |
| 6          | rs1655364  | 0.480144  | 0.432856     | 0.041175785 |
| 9          | rs10869042 | 0.218638  | 0.181834     | 0.041175785 |
| 14         | rs10873449 | 0.136201  | 0.170474     | 0.041175785 |
| 16         | rs7201472  | 0.136201  | 0.106742     | 0.041175785 |

Table DS2: All SNPs tested for association (RDC SABP vs. controls) with the Cochran-Armitage trend test and significant at the p=0.05 threshold.

| chromosome | SNP           | MAF_cases | MAF_controls | p_value     |
|------------|---------------|-----------|--------------|-------------|
| 20         | rs6081461     | 0.267986  | 0.228464     | 0.041175785 |
| 1          | rs259325      | 0.453237  | 0.407155     | 0.041198703 |
| 4          | rs12499640    | 0.386282  | 0.341738     | 0.041198703 |
| 4          | rs6850817     | 0.168459  | 0.205802     | 0.041198703 |
| 4          | rs4862450     | 0.401434  | 0.448229     | 0.041198703 |
| 6          | rs3905237     | 0.15343   | 0.189415     | 0.041198703 |
| 9          | rs7034335     | 0.438849  | 0.392772     | 0.041198703 |
| 12         | rs4767703     | 0.234767  | 0.197548     | 0.041198703 |
| 14         | rs10131139    | 0.187726  | 0.226422     | 0.041198703 |
| 3          | rs9869347     | 0.26259   | 0.306133     | 0.041221635 |
| 4          | rs4512036     | 0.514337  | 0.467802     | 0.041221635 |
| 6          | rs3792971     | 0.270609  | 0.231175     | 0.041221635 |
| 20         | rs6077498     | 0.235612  | 0.197785     | 0.041221635 |
| 3          | rs16853076    | 0.09319   | 0.0690419    | 0.04124458  |
| 4          | rs1957731     | 0.216846  | 0.180797     | 0.04124458  |
| 6          | rs1224760     | 0.426523  | 0.473083     | 0.04124458  |
| 9          | rs3829073     | 0.102151  | 0.133594     | 0.04124458  |
| 10         | rs11187389    | 0.188849  | 0.227816     | 0.04124458  |
| 11         | rs4756911     | 0.0752688 | 0.102695     | 0.04124458  |
| 13         | rs582854      | 0.516129  | 0.468825     | 0.04124458  |
| 20         | rs6055125     | 0.412186  | 0.458645     | 0.04124458  |
| 20         | rs2235825     | 0.0734767 | 0.101568     | 0.04124458  |
| 3          | rs4580548     | 0.0645161 | 0.0911414    | 0.041267539 |
| 5          | rs2188465     | 0.242806  | 0.284715     | 0.041267539 |
| 16         | rs4785595     | 0.370968  | 0.41661      | 0.041267539 |
| 18         | rs17736813    | 0.265233  | 0.226048     | 0.041267539 |
| 18         | SNP_A-1839840 | 0.109712  | 0.0836172    | 0.041267539 |
| 20         | rs968324      | 0.395683  | 0.351024     | 0.041267539 |
| 2          | rs243018      | 0.399642  | 0.445334     | 0.041290511 |
| 2          | rs7607353     | 0.0647482 | 0.0912185    | 0.041290511 |
| 4          | rs13105969    | 0.265233  | 0.308191     | 0.041290511 |
| 6          | rs9391913     | 0.399642  | 0.354976     | 0.041290511 |
| 8          | rs7007093     | 0.422662  | 0.469666     | 0.041290511 |
| 9          | rs1998247     | 0.202509  | 0.241914     | 0.041290511 |
| 12         | rs716553      | 0.351254  | 0.307601     | 0.041290511 |
| 18         | rs1657415     | 0.304348  | 0.348837     | 0.041290511 |
| 5          | rs11958844    | 0.235612  | 0.277002     | 0.041313497 |
| 8          | rs7464067     | 0.27957   | 0.239583     | 0.041313497 |
| 10         | rs11007559    | 0.167266  | 0.20405      | 0.041313497 |
| 13         | rs9543150     | 0.193548  | 0.232788     | 0.041313497 |
| 2          | rs17762597    | 0.240143  | 0.202864     | 0.041336496 |
| 8          | rs10503617    | 0.170251  | 0.208106     | 0.041336496 |
| 13         | rs9535866     | 0.419065  | 0.464942     | 0.041336496 |
| 19         | rs10419036    | 0.102151  | 0.0771195    | 0.041336496 |
| 21         | rs243725      | 0.202509  | 0.167292     | 0.041336496 |
| 2          | rs2056735     | 0.299283  | 0.343047     | 0.041359508 |
| 2          | rs7419288     | 0.166667  | 0.134766     | 0.041359508 |
| 3          | rs1390304     | 0.366906  | 0.322427     | 0.041359508 |
| 3          | rs17545865    | 0.206093  | 0.246162     | 0.041359508 |
| 4          | rs3811790     | 0.11828   | 0.15121      | 0.041359508 |
| 4          | rs2118922     | 0.444444  | 0.490113     | 0.041359508 |
| 11         | rs7112850     | 0.336331  | 0.38109      | 0.041359508 |

Table DS2: All SNPs tested for association (RDC SABP vs. controls) with the Cochran-Armitage trend test and significant at the p=0.05 threshold.

| chromosome | SNP        | MAF_cases | MAF_controls | p_value     |
|------------|------------|-----------|--------------|-------------|
| 14         | rs2038532  | 0.129032  | 0.100204     | 0.041359508 |
| 16         | rs393161   | 0.198925  | 0.164337     | 0.041359508 |
| 2          | rs11895936 | 0.476703  | 0.43047      | 0.041382534 |
| 2          | rs4674663  | 0.0503597 | 0.074276     | 0.041382534 |
| 3          | rs3804850  | 0.195341  | 0.234753     | 0.041382534 |
| 3          | rs4684800  | 0.311151  | 0.355877     | 0.041382534 |
| 4          | rs10020948 | 0.215054  | 0.254691     | 0.041382534 |
| 6          | rs3117016  | 0.348921  | 0.393929     | 0.041382534 |
| 12         | rs699603   | 0.151079  | 0.187436     | 0.041382534 |
| 13         | rs7335790  | 0.0467626 | 0.0705281    | 0.041382534 |
| 3          | rs6443195  | 0.183453  | 0.222678     | 0.041405573 |
| 3          | rs334538   | 0.209386  | 0.174046     | 0.041405573 |
| 3          | rs1913290  | 0.465827  | 0.420109     | 0.041405573 |
| 12         | rs11109470 | 0.169065  | 0.206514     | 0.041405573 |
| 16         | rs6499221  | 0.330935  | 0.288075     | 0.041405573 |
| 20         | rs2076395  | 0.437276  | 0.483475     | 0.041405573 |
| 5          | rs4921163  | 0.250896  | 0.212701     | 0.041428626 |
| 5          | rs10516073 | 0.299283  | 0.344123     | 0.041428626 |
| 8          | rs596775   | 0.175627  | 0.14293      | 0.041428626 |
| 12         | rs11057787 | 0.136201  | 0.106814     | 0.041428626 |
| 3          | rs12489571 | 0.354317  | 0.310733     | 0.041451693 |
| 3          | rs13086740 | 0.122302  | 0.155707     | 0.041451693 |
| 4          | rs4643872  | 0.362007  | 0.318306     | 0.041451693 |
| 7          | rs4947934  | 0.539427  | 0.493522     | 0.041451693 |
| 9          | rs993951   | 0.448029  | 0.402655     | 0.041451693 |
| 9          | rs12379583 | 0.200717  | 0.165815     | 0.041451693 |
| 9          | rs473261   | 0.422939  | 0.469506     | 0.041451693 |
| 15         | rs8039781  | 0.27957   | 0.2397       | 0.041451693 |
| 20         | rs6076466  | 0.230216  | 0.271565     | 0.041451693 |
| 20         | rs1099620  | 0.133574  | 0.104778     | 0.041451693 |
| 1          | rs1251079  | 0.351254  | 0.396628     | 0.041474772 |
| 2          | rs11885110 | 0.358423  | 0.403951     | 0.041474772 |
| 13         | rs2258682  | 0.134409  | 0.105514     | 0.041474772 |
| 13         | rs2258520  | 0.134409  | 0.105514     | 0.041474772 |
| 18         | rs4021229  | 0.437276  | 0.483123     | 0.041474772 |
| 4          | rs1963525  | 0.356115  | 0.401944     | 0.041497866 |
| 4          | rs6845004  | 0.286738  | 0.246419     | 0.041497866 |
| 14         | rs17118171 | 0.0716846 | 0.0993502    | 0.041497866 |
| 2          | rs10195884 | 0.324373  | 0.36921      | 0.041520973 |
| 3          | rs6769189  | 0.102151  | 0.13364      | 0.041520973 |
| 3          | rs4894919  | 0.274194  | 0.31812      | 0.041520973 |
| 4          | rs9995075  | 0.370504  | 0.326465     | 0.041520973 |
| 6          | rs2496296  | 0.166667  | 0.203685     | 0.041520973 |
| 6          | rs2744537  | 0.320789  | 0.279367     | 0.041520973 |
| 7          | rs12536861 | 0.215054  | 0.256218     | 0.041520973 |
| 15         | rs17646626 | 0.387097  | 0.43314      | 0.041520973 |
| 1          | rs11265607 | 0.261649  | 0.304089     | 0.041544093 |
| 3          | rs2046969  | 0.168459  | 0.206203     | 0.041544093 |
| 5          | rs6888692  | 0.143369  | 0.178316     | 0.041544093 |
| 6          | rs3918474  | 0.341727  | 0.299659     | 0.041544093 |
| 6          | rs509868   | 0.218412  | 0.181911     | 0.041544093 |
| 15         | rs11072153 | 0.485612  | 0.43912      | 0.041544093 |



Table DS2: All SNPs tested for association (RDC SABP vs. controls) with the Cochran-Armitage trend test and significant at the p=0.05 threshold.

| chromosome | SNP        | MAF_cases | MAF_controls | p_value     |
|------------|------------|-----------|--------------|-------------|
| 15         | rs7170819  | 0.132616  | 0.166951     | 0.041544093 |
| 2          | rs7598263  | 0.33871   | 0.296662     | 0.041567227 |
| 2          | rs17039367 | 0.0860215 | 0.11545      | 0.041567227 |
| 6          | rs9402178  | 0.116487  | 0.149455     | 0.041567227 |
| 15         | rs894290   | 0.18638   | 0.225213     | 0.041567227 |
| 1          | rs17368402 | 0.09319   | 0.123255     | 0.041590374 |
| 3          | rs1517056  | 0.267025  | 0.228094     | 0.041590374 |
| 6          | rs270041   | 0.458633  | 0.412406     | 0.041590374 |
| 8          | rs6473900  | 0.167266  | 0.135126     | 0.041590374 |
| 9          | rs10965215 | 0.492832  | 0.446544     | 0.041590374 |
| 12         | rs2370411  | 0.201439  | 0.241661     | 0.041590374 |
| 12         | rs11048605 | 0.145161  | 0.180641     | 0.041590374 |
| 13         | rs1885895  | 0.276978  | 0.236698     | 0.041590374 |
| 1          | rs12081912 | 0.172043  | 0.139646     | 0.041613535 |
| 1          | rs11208170 | 0.0863309 | 0.116224     | 0.041613535 |
| 1          | rs2388923  | 0.219424  | 0.183259     | 0.041613535 |
| 2          | rs1020410  | 0.334532  | 0.292305     | 0.041613535 |
| 9          | rs16919341 | 0.218638  | 0.182561     | 0.041613535 |
| 12         | rs7138546  | 0.285971  | 0.330324     | 0.041613535 |
| 13         | rs9317629  | 0.431159  | 0.478024     | 0.041613535 |
| 14         | rs7400788  | 0.489247  | 0.44276      | 0.041613535 |
| 1          | rs10911232 | 0.366906  | 0.413147     | 0.04163671  |
| 2          | rs12623703 | 0.179211  | 0.146167     | 0.04163671  |
| 4          | rs13108247 | 0.155914  | 0.192164     | 0.04163671  |
| 8          | rs6470892  | 0.429856  | 0.384196     | 0.04163671  |
| 13         | rs9510842  | 0.18638   | 0.225477     | 0.04163671  |
| 15         | rs4924305  | 0.44964   | 0.403748     | 0.04163671  |
| 19         | rs7247301  | 0.179211  | 0.217643     | 0.04163671  |
| 6          | rs1852986  | 0.535842  | 0.489782     | 0.041659898 |
| 8          | rs2132070  | 0.308244  | 0.352439     | 0.041659898 |
| 10         | rs2584867  | 0.419065  | 0.373765     | 0.041659898 |
| 14         | rs10483420 | 0.344086  | 0.300987     | 0.041659898 |
| 15         | rs2056506  | 0.124101  | 0.0965271    | 0.041659898 |
| 18         | rs8092151  | 0.159498  | 0.128362     | 0.041659898 |
| 3          | rs9820254  | 0.244604  | 0.285934     | 0.041683099 |
| 12         | rs10771592 | 0.25448   | 0.215843     | 0.041683099 |
| 12         | rs7299166  | 0.229391  | 0.270528     | 0.041683099 |
| 17         | rs222762   | 0.340502  | 0.385598     | 0.041683099 |
| 2          | rs7584343  | 0.170251  | 0.138283     | 0.041706315 |
| 2          | rs1508120  | 0.396057  | 0.351499     | 0.041706315 |
| 2          | rs4672670  | 0.310036  | 0.354465     | 0.041706315 |
| 5          | rs13358120 | 0.170863  | 0.208703     | 0.041706315 |
| 5          | rs10051540 | 0.16065   | 0.197306     | 0.041706315 |
| 7          | rs2965604  | 0.295699  | 0.254437     | 0.041706315 |
| 8          | rs10098173 | 0.159498  | 0.19652      | 0.041706315 |
| 12         | rs1843371  | 0.163082  | 0.131525     | 0.041706315 |
| 15         | rs2866104  | 0.361511  | 0.407635     | 0.041706315 |
| 21         | rs2187020  | 0.24552   | 0.287223     | 0.041706315 |
| 21         | rs2827660  | 0.451613  | 0.405718     | 0.041706315 |
| 21         | rs7279655  | 0.134409  | 0.169281     | 0.041706315 |
| 1          | rs269080   | 0.250896  | 0.293667     | 0.041729544 |
| 2          | rs13395978 | 0.0949821 | 0.125638     | 0.041729544 |

Table DS2 All SNPs tested for association (RDC SABP vs. controls) with the Cochran-Armitage trend test and significant at the p=0.05 threshold.

| chromosome | SNP        | MAF_cases | MAF_controls | p_value     |
|------------|------------|-----------|--------------|-------------|
| 4          | rs2604825  | 0.338129  | 0.295501     | 0.041729544 |
| 5          | rs37543    | 0.169065  | 0.136286     | 0.041729544 |
| 7          | rs1035205  | 0.207581  | 0.247271     | 0.041729544 |
| 7          | rs6466966  | 0.426523  | 0.381131     | 0.041729544 |
| 8          | rs1499646  | 0.218638  | 0.182329     | 0.041729544 |
| 8          | rs11991235 | 0.160072  | 0.197099     | 0.041729544 |
| 12         | rs11611403 | 0.184116  | 0.150783     | 0.041729544 |
| 13         | rs4943387  | 0.329749  | 0.287491     | 0.041729544 |
| 17         | rs9896014  | 0.222222  | 0.26288      | 0.041729544 |
| 20         | rs6048920  | 0.264388  | 0.225735     | 0.041729544 |
| 3          | rs10212532 | 0.356631  | 0.403132     | 0.041752786 |
| 4          | rs2130926  | 0.0985663 | 0.129813     | 0.041752786 |
| 6          | rs16877440 | 0.105735  | 0.137572     | 0.041752786 |
| 8          | rs10216531 | 0.433213  | 0.386805     | 0.041752786 |
| 8          | rs6470837  | 0.221223  | 0.184453     | 0.041752786 |
| 9          | rs17055001 | 0.270609  | 0.313458     | 0.041752786 |
| 12         | rs10778037 | 0.433692  | 0.388454     | 0.041752786 |
| 14         | rs10144464 | 0.228417  | 0.191928     | 0.041752786 |
| 22         | rs5771222  | 0.44964   | 0.496253     | 0.041752786 |
| 5          | rs6451231  | 0.284946  | 0.328678     | 0.041776042 |
| 4          | rs12643016 | 0.204301  | 0.244297     | 0.041799312 |
| 6          | rs16877434 | 0.143885  | 0.179727     | 0.041799312 |
| 6          | rs9474014  | 0.0573477 | 0.0827363    | 0.041799312 |
| 6          | rs7741003  | 0.383094  | 0.428474     | 0.041799312 |
| 7          | rs2372029  | 0.156475  | 0.125171     | 0.041799312 |
| 7          | rs1047129  | 0.440647  | 0.487053     | 0.041799312 |
| 11         | rs7943538  | 0.258993  | 0.301227     | 0.041799312 |
| 16         | rs8059315  | 0.219424  | 0.182902     | 0.041799312 |
| 17         | rs8070008  | 0.277778  | 0.321173     | 0.041799312 |
| 20         | rs1327905  | 0.0842294 | 0.113063     | 0.041799312 |
| 20         | rs12480106 | 0.145161  | 0.180518     | 0.041799312 |
| 21         | rs2155889  | 0.24552   | 0.287198     | 0.041799312 |
| 2          | rs6436381  | 0.0358423 | 0.0566166    | 0.041822595 |
| 8          | rs2132349  | 0.473118  | 0.427768     | 0.041822595 |
| 2          | rs10207070 | 0.278777  | 0.321246     | 0.041845892 |
| 4          | rs7377110  | 0.482079  | 0.43609      | 0.041845892 |
| 9          | rs320949   | 0.15233   | 0.188203     | 0.041845892 |
| 3          | rs1077729  | 0.385305  | 0.431393     | 0.041869202 |
| 10         | rs7921982  | 0.347122  | 0.304089     | 0.041869202 |
| 12         | rs7295027  | 0.363799  | 0.319891     | 0.041869202 |
| 18         | rs2199937  | 0.100358  | 0.131892     | 0.041869202 |
| 18         | rs9945649  | 0.293907  | 0.337538     | 0.041869202 |
| 3          | rs13063593 | 0.0523466 | 0.0768443    | 0.041892526 |
| 5          | rs801186   | 0.244604  | 0.206614     | 0.041892526 |
| 13         | rs9590679  | 0.22043   | 0.183986     | 0.041892526 |
| 21         | rs408465   | 0.385305  | 0.431446     | 0.041892526 |
| 7          | rs7802554  | 0.241007  | 0.203476     | 0.041915864 |
| 11         | rs7120486  | 0.215827  | 0.179816     | 0.041915864 |
| 11         | rs10790914 | 0.286738  | 0.330211     | 0.041915864 |
| 17         | rs17562516 | 0.336918  | 0.294518     | 0.041915864 |
| 20         | rs910860   | 0.360215  | 0.317036     | 0.041915864 |
| 1          | rs509749   | 0.379928  | 0.42609      | 0.041939216 |

Table DS2: All SNPs tested for association (RDC SABP vs. controls) with the Cochran-Armitage trend test and significant at the p=0.05 threshold.

| chromosome | SNP           | MAF_cases | MAF_controls | p_value     |
|------------|---------------|-----------|--------------|-------------|
| 1          | rs10489964    | 0.18705   | 0.22529      | 0.041939216 |
| 4          | SNP_A-2207041 | 0.301075  | 0.260225     | 0.041939216 |
| 7          | rs3807325     | 0.272401  | 0.315781     | 0.041939216 |
| 1          | rs9435825     | 0.27957   | 0.2397       | 0.041962581 |
| 2          | rs2023545     | 0.388889  | 0.344687     | 0.041962581 |
| 2          | rs6713173     | 0.5       | 0.453552     | 0.041962581 |
| 4          | rs3796563     | 0.473022  | 0.426842     | 0.041962581 |
| 6          | rs220768      | 0.270609  | 0.313629     | 0.041962581 |
| 9          | rs2183938     | 0.24552   | 0.207525     | 0.041962581 |
| 13         | rs4112704     | 0.299283  | 0.257916     | 0.041962581 |
| 1          | rs4333869     | 0.28853   | 0.331574     | 0.041985959 |
| 1          | rs1077580     | 0.446043  | 0.400852     | 0.041985959 |
| 4          | rs1545330     | 0.369176  | 0.325546     | 0.041985959 |
| 7          | rs1178102     | 0.213262  | 0.178059     | 0.041985959 |
| 7          | rs10265578    | 0.292115  | 0.335954     | 0.042009352 |
| 22         | rs4822697     | 0.25448   | 0.296524     | 0.042009352 |
| 3          | rs11916806    | 0.0591398 | 0.0847284    | 0.042032758 |
| 3          | rs342507      | 0.147482  | 0.183464     | 0.042032758 |
| 5          | rs1393266     | 0.207885  | 0.247785     | 0.042032758 |
| 8          | rs10504958    | 0.258065  | 0.219346     | 0.042032758 |
| 10         | rs943875      | 0.294964  | 0.254511     | 0.042032758 |
| 11         | rs11023055    | 0.336918  | 0.381512     | 0.042032758 |
| 13         | rs2490960     | 0.134409  | 0.105586     | 0.042032758 |
| 13         | rs2258680     | 0.134409  | 0.105586     | 0.042032758 |
| 17         | rs277067      | 0.111511  | 0.143854     | 0.042032758 |
| 19         | rs6510725     | 0.453405  | 0.408069     | 0.042032758 |
| 4          | rs6817631     | 0.480287  | 0.434242     | 0.042056178 |
| 6          | rs9463076     | 0.453405  | 0.499319     | 0.042056178 |
| 10         | rs11000713    | 0.275986  | 0.236267     | 0.042056178 |
| 12         | rs1056340     | 0.100358  | 0.131086     | 0.042056178 |
| 12         | rs12425559    | 0.147482  | 0.116644     | 0.042056178 |
| 14         | rs1749938     | 0.280576  | 0.239959     | 0.042056178 |
| 21         | rs468345      | 0.306452  | 0.351057     | 0.042056178 |
| 1          | rs3010367     | 0.238267  | 0.280313     | 0.042079612 |
| 1          | rs7540329     | 0.422662  | 0.377687     | 0.042079612 |
| 9          | rs3181200     | 0.471223  | 0.425554     | 0.042079612 |
| 12         | SNP_A-2036588 | 0.320789  | 0.365509     | 0.042079612 |
| 15         | rs885203      | 0.422662  | 0.377978     | 0.042079612 |
| 16         | rs13330807    | 0.0734767 | 0.0524345    | 0.042079612 |
| 2          | rs4670100     | 0.16065   | 0.128878     | 0.042103059 |
| 5          | rs4432863     | 0.125448  | 0.0974114    | 0.042103059 |
| 11         | rs7104025     | 0.49639   | 0.450068     | 0.042103059 |
| 14         | rs2255461     | 0.282374  | 0.324923     | 0.042103059 |
| 20         | rs4813669     | 0.306452  | 0.350614     | 0.042103059 |
| 21         | rs2834787     | 0.121864  | 0.155078     | 0.042103059 |
| 1          | rs10875248    | 0.290323  | 0.333504     | 0.04212652  |
| 2          | SNP_A-2257073 | 0.186594  | 0.224855     | 0.04212652  |
| 3          | rs3774692     | 0.249104  | 0.29134      | 0.04212652  |
| 10         | rs12359649    | 0.246403  | 0.28791      | 0.04212652  |
| 15         | rs6496620     | 0.224014  | 0.265007     | 0.04212652  |
| 2          | rs6725764     | 0.24552   | 0.287078     | 0.042149995 |
| 2          | rs13030799    | 0.404676  | 0.359673     | 0.042149995 |

Table DS2: All SNPs tested for association (RDC SABP vs. controls) with the Cochran-Armitage trend test and significant at the p=0.05 threshold.

| chromosome | SNP           | MAF_cases | MAF_controls | p_value     |
|------------|---------------|-----------|--------------|-------------|
| 3          | rs952621      | 0.16129   | 0.197785     | 0.042149995 |
| 3          | SNP_A-4271407 | 0.121864  | 0.0942721    | 0.042149995 |
| 5          | rs1501718     | 0.392473  | 0.348568     | 0.042149995 |
| 5          | rs6873702     | 0.112903  | 0.145392     | 0.042149995 |
| 7          | SNP_A-1814062 | 0.155914  | 0.124744     | 0.042149995 |
| 7          | rs1639480     | 0.261733  | 0.304266     | 0.042149995 |
| 10         | rs6481297     | 0.439068  | 0.393697     | 0.042149995 |
| 18         | rs7237852     | 0.365108  | 0.410422     | 0.042149995 |
| 1          | rs11206186    | 0.399281  | 0.445863     | 0.042173484 |
| 11         | rs4756135     | 0.292115  | 0.33549      | 0.042173484 |
| 11         | rs11237155    | 0.241935  | 0.20453      | 0.042173484 |
| 15         | rs7165721     | 0.399642  | 0.445486     | 0.042173484 |
| 18         | rs2003159     | 0.129032  | 0.163658     | 0.042173484 |
| 20         | rs12481129    | 0.30036   | 0.259789     | 0.042173484 |
| 20         | rs17441250    | 0.154122  | 0.190379     | 0.042173484 |
| 2          | rs11692203    | 0.139785  | 0.175546     | 0.042196986 |
| 6          | rs9347543     | 0.192446  | 0.231333     | 0.042196986 |
| 2          | rs11690497    | 0.374552  | 0.330832     | 0.042220502 |
| 3          | rs4277695     | 0.265343  | 0.226312     | 0.042220502 |
| 3          | rs940901      | 0.415771  | 0.370907     | 0.042220502 |
| 4          | rs11096854    | 0.207885  | 0.172514     | 0.042220502 |
| 4          | rs2068148     | 0.252688  | 0.294198     | 0.042220502 |
| 6          | rs198527      | 0.482079  | 0.436116     | 0.042220502 |
| 11         | rs7130716     | 0.0806452 | 0.10954      | 0.042220502 |
| 16         | rs12925980    | 0.302158  | 0.346403     | 0.042220502 |
| 2          | rs6751984     | 0.206093  | 0.245743     | 0.042244032 |
| 3          | rs163966      | 0.136201  | 0.170811     | 0.042244032 |
| 6          | rs7768443     | 0.535842  | 0.489949     | 0.042244032 |
| 9          | rs7869989     | 0.487455  | 0.440846     | 0.042244032 |
| 11         | rs1785899     | 0.286738  | 0.330038     | 0.042244032 |
| 13         | rs12866705    | 0.18638   | 0.225367     | 0.042244032 |
| 18         | rs1025807     | 0.0920578 | 0.12248      | 0.042244032 |
| 21         | rs2827975     | 0.134409  | 0.16922      | 0.042244032 |
| 1          | rs11578560    | 0.175627  | 0.142979     | 0.042267575 |
| 7          | rs10949644    | 0.383094  | 0.429253     | 0.042267575 |
| 10         | rs11257156    | 0.182796  | 0.221521     | 0.042267575 |
| 10         | rs7096453     | 0.530466  | 0.484833     | 0.042267575 |
| 11         | rs3903072     | 0.417563  | 0.463909     | 0.042267575 |
| 12         | rs11045409    | 0.393885  | 0.349659     | 0.042267575 |
| 14         | rs8012481     | 0.526882  | 0.48073      | 0.042267575 |
| 15         | rs12900312    | 0.424731  | 0.379816     | 0.042267575 |
| 21         | rs2835989     | 0.462094  | 0.416439     | 0.042267575 |
| 1          | rs4363461     | 0.435484  | 0.389915     | 0.042291133 |
| 2          | rs12997617    | 0.191756  | 0.158262     | 0.042291133 |
| 7          | rs17169206    | 0.0881295 | 0.117878     | 0.042291133 |
| 11         | rs4945441     | 0.137993  | 0.172631     | 0.042291133 |
| 16         | rs11642823    | 0.0376344 | 0.058984     | 0.042291133 |
| 17         | rs203076      | 0.204301  | 0.244467     | 0.042291133 |
| 21         | rs2835072     | 0.132616  | 0.16678      | 0.042291133 |
| 2          | rs16867399    | 0.0755396 | 0.0545331    | 0.042314704 |
| 7          | rs6971090     | 0.11828   | 0.151175     | 0.042314704 |
| 9          | rs6476731     | 0.116906  | 0.09015      | 0.042314704 |

Table DS2: All SNPs tested for association (RDC SABP vs. controls) with the Cochran-Armitage trend test and significant at the p=0.05 threshold.

| chromosome | SNP           | MAF_cases | MAF_controls | p_value     |
|------------|---------------|-----------|--------------|-------------|
| 9          | rs7856021     | 0.501792  | 0.455722     | 0.042314704 |
| 11         | rs10830991    | 0.253597  | 0.295369     | 0.042314704 |
| 12         | rs11061010    | 0.125448  | 0.159346     | 0.042314704 |
| 13         | rs9550886     | 0.52509   | 0.479223     | 0.042314704 |
| 17         | rs1719220     | 0.232014  | 0.272913     | 0.042314704 |
| 21         | rs2827659     | 0.451613  | 0.405856     | 0.042314704 |
| 22         | rs6009006     | 0.372302  | 0.41735      | 0.042314704 |
| 4          | rs10031769    | 0.320144  | 0.278213     | 0.042338289 |
| 4          | rs12647316    | 0.078853  | 0.107155     | 0.042338289 |
| 7          | rs1628880     | 0.227599  | 0.191076     | 0.042338289 |
| 11         | rs17144544    | 0.214029  | 0.178596     | 0.042338289 |
| 13         | rs2066647     | 0.209677  | 0.173824     | 0.042338289 |
| 16         | rs7186888     | 0.44964   | 0.404063     | 0.042338289 |
| 7          | rs11769147    | 0.215054  | 0.256044     | 0.042361888 |
| 10         | rs7078370     | 0.268817  | 0.311861     | 0.042361888 |
| 13         | rs9599966     | 0.170251  | 0.138066     | 0.042361888 |
| 13         | rs7336581     | 0.453237  | 0.499489     | 0.042361888 |
| 1          | rs2649627     | 0.131295  | 0.165928     | 0.042385501 |
| 7          | rs1524339     | 0.274194  | 0.31682      | 0.042385501 |
| 14         | SNP_A-4236654 | 0.0483871 | 0.0722809    | 0.042385501 |
| 18         | rs4245266     | 0.284946  | 0.245145     | 0.042385501 |
| 21         | rs9305170     | 0.134409  | 0.169278     | 0.042385501 |
| 1          | rs10889448    | 0.182796  | 0.149813     | 0.042409127 |
| 2          | rs6542877     | 0.0974729 | 0.128328     | 0.042409127 |
| 4          | rs4698574     | 0.22043   | 0.184435     | 0.042409127 |
| 6          | rs270377      | 0.388489  | 0.434923     | 0.042409127 |
| 15         | rs610592      | 0.176259  | 0.143514     | 0.042409127 |
| 16         | rs1510213     | 0.458633  | 0.412836     | 0.042409127 |
| 18         | rs7236739     | 0.342294  | 0.299659     | 0.042409127 |
| 1          | rs1475703     | 0.281362  | 0.241914     | 0.042432768 |
| 3          | rs1494833     | 0.210145  | 0.174581     | 0.042432768 |
| 3          | rs10510990    | 0.232014  | 0.195259     | 0.042432768 |
| 6          | rs3916765     | 0.0913978 | 0.121806     | 0.042432768 |
| 6          | rs9489195     | 0.178058  | 0.145024     | 0.042432768 |
| 9          | rs7867897     | 0.250896  | 0.212411     | 0.042432768 |
| 9          | rs7040219     | 0.37276   | 0.418256     | 0.042432768 |
| 13         | rs9512986     | 0.172043  | 0.20998      | 0.042432768 |
| 17         | rs7209493     | 0.178058  | 0.145293     | 0.042432768 |
| 1          | rs1337070     | 0.120072  | 0.0928134    | 0.042456422 |
| 2          | rs6436559     | 0.0949821 | 0.0713554    | 0.042456422 |
| 3          | rs2236964     | 0.111111  | 0.143003     | 0.042456422 |
| 6          | rs2621382     | 0.498201  | 0.451822     | 0.042456422 |
| 7          | rs2117950     | 0.113718  | 0.0871935    | 0.042456422 |
| 21         | rs1571715     | 0.306859  | 0.350922     | 0.042456422 |
| 2          | rs650588      | 0.375899  | 0.42237      | 0.04248009  |
| 2          | rs1011622     | 0.0860215 | 0.0630539    | 0.04248009  |
| 2          | rs4674407     | 0.451613  | 0.497613     | 0.04248009  |
| 6          | rs9385828     | 0.0448029 | 0.0682128    | 0.04248009  |
| 12         | rs12307921    | 0.0863309 | 0.0635002    | 0.04248009  |
| 1          | rs4950846     | 0.449821  | 0.496251     | 0.042503772 |
| 4          | rs10023191    | 0.0985663 | 0.129655     | 0.042503772 |
| 5          | rs2112561     | 0.236559  | 0.277759     | 0.042503772 |

Table DS2: All SNPs tested for association (RDC SABP vs. controls) with the Cochran-Armitage trend test and significant at the p=0.05 threshold.

| chromosome | SNP        | MAF_cases | MAF_controls | p_value     |
|------------|------------|-----------|--------------|-------------|
| 6          | rs2345143  | 0.0734767 | 0.0525239    | 0.042503772 |
| 7          | rs38474    | 0.140288  | 0.175238     | 0.042503772 |
| 10         | rs4748048  | 0.473022  | 0.427161     | 0.042503772 |
| 6          | rs17278136 | 0.146953  | 0.182902     | 0.042527468 |
| 7          | rs10229522 | 0.256272  | 0.21808      | 0.042527468 |
| 13         | rs1287505  | 0.336918  | 0.381471     | 0.042527468 |
| 16         | rs4783832  | 0.336918  | 0.294479     | 0.042527468 |
| 3          | rs352291   | 0.189531  | 0.155908     | 0.042551177 |
| 8          | rs7005216  | 0.434783  | 0.481216     | 0.042551177 |
| 11         | rs4456262  | 0.415771  | 0.461683     | 0.042551177 |
| 17         | rs17617010 | 0.0917266 | 0.121723     | 0.042551177 |
| 17         | rs807072   | 0.430108  | 0.384026     | 0.042551177 |
| 19         | rs901792   | 0.140288  | 0.175349     | 0.042551177 |
| 2          | rs9679162  | 0.455197  | 0.410143     | 0.042574901 |
| 2          | rs6756311  | 0.311828  | 0.356656     | 0.042574901 |
| 3          | rs357155   | 0.304659  | 0.348893     | 0.042574901 |
| 5          | rs13183976 | 0.383094  | 0.338726     | 0.042574901 |
| 6          | rs1994619  | 0.225806  | 0.189332     | 0.042574901 |
| 10         | rs10824022 | 0.274194  | 0.234763     | 0.042574901 |
| 15         | rs12595609 | 0.421147  | 0.466872     | 0.042574901 |
| 17         | rs7208837  | 0.172043  | 0.209898     | 0.042574901 |
| 1          | rs4508052  | 0.331541  | 0.289393     | 0.042598639 |
| 1          | rs474131   | 0.379928  | 0.425945     | 0.042598639 |
| 6          | rs12204264 | 0.381295  | 0.337023     | 0.042598639 |
| 1          | rs2235928  | 0.247312  | 0.209128     | 0.04262239  |
| 6          | rs7743566  | 0.232975  | 0.274293     | 0.04262239  |
| 11         | rs12279768 | 0.181004  | 0.147751     | 0.04262239  |
| 15         | rs3743352  | 0.0896057 | 0.119461     | 0.04262239  |
| 16         | rs17639894 | 0.228417  | 0.191518     | 0.04262239  |
| 4          | rs11724663 | 0.28853   | 0.248211     | 0.042646155 |
| 6          | rs12205836 | 0.24552   | 0.208277     | 0.042646155 |
| 8          | rs2721290  | 0.190647  | 0.156559     | 0.042646155 |
| 18         | rs7230697  | 0.243728  | 0.205822     | 0.042646155 |
| 1          | rs1392141  | 0.399642  | 0.445656     | 0.042669935 |
| 1          | rs4844692  | 0.410394  | 0.45687      | 0.042669935 |
| 4          | rs2310157  | 0.193841  | 0.159734     | 0.042669935 |
| 11         | rs7104485  | 0.120072  | 0.152707     | 0.042669935 |
| 11         | rs613587   | 0.336918  | 0.29499      | 0.042669935 |
| 12         | rs4759640  | 0.318996  | 0.277191     | 0.042669935 |
| 17         | rs4968755  | 0.535842  | 0.489785     | 0.042669935 |
| 2          | rs962052   | 0.216846  | 0.256982     | 0.042693728 |
| 10         | rs1946842  | 0.366426  | 0.323208     | 0.042693728 |
| 11         | rs12789353 | 0.413978  | 0.369417     | 0.042693728 |
| 16         | rs4782263  | 0.0758123 | 0.104031     | 0.042693728 |
| 2          | rs12466468 | 0.263441  | 0.305792     | 0.042717535 |
| 10         | rs290489   | 0.189964  | 0.22862      | 0.042717535 |
| 21         | rs2834969  | 0.166667  | 0.203748     | 0.042717535 |
| 1          | rs7367951  | 0.354839  | 0.311883     | 0.042741356 |
| 2          | rs7579290  | 0.418182  | 0.464383     | 0.042741356 |
| 6          | rs10947539 | 0.200717  | 0.166099     | 0.042741356 |
| 11         | rs12798618 | 0.519784  | 0.473433     | 0.042741356 |
| 20         | rs852350   | 0.24      | 0.202417     | 0.042741356 |

Table DS2 All SNPs tested for association (RDC SABP vs. controls) with the Cochran-Armitage trend test and significant at the p=0.05 threshold.

| chromosome | SNP        | MAF_cases | MAF_controls | p_value     |
|------------|------------|-----------|--------------|-------------|
| 20         | rs12625413 | 0.302158  | 0.346141     | 0.042741356 |
| 1          | rs1416234  | 0.290323  | 0.33322      | 0.042765191 |
| 2          | rs1434206  | 0.334532  | 0.379959     | 0.042765191 |
| 3          | rs17826300 | 0.0806452 | 0.058643     | 0.042765191 |
| 3          | rs6792544  | 0.366906  | 0.32362      | 0.042765191 |
| 6          | rs1321355  | 0.320789  | 0.279292     | 0.042765191 |
| 11         | rs10898037 | 0.202509  | 0.242078     | 0.042765191 |
| 1          | rs11206367 | 0.0591398 | 0.0844399    | 0.042789041 |
| 9          | rs10993628 | 0.341727  | 0.29908      | 0.042789041 |
| 12         | rs2484591  | 0.0358423 | 0.0565781    | 0.042789041 |
| 14         | rs17120305 | 0.184588  | 0.222771     | 0.042789041 |
| 16         | rs12448255 | 0.281362  | 0.241914     | 0.042789041 |
| 17         | rs149245   | 0.340502  | 0.385349     | 0.042789041 |
| 20         | rs4564856  | 0.492832  | 0.446848     | 0.042789041 |
| 22         | rs2241049  | 0.395683  | 0.350988     | 0.042789041 |
| 9          | rs10809248 | 0.483813  | 0.437819     | 0.042812904 |
| 16         | rs2173454  | 0.33871   | 0.296082     | 0.042812904 |
| 5          | rs17404956 | 0.0663082 | 0.0930788    | 0.042836781 |
| 6          | rs4947157  | 0.284946  | 0.328455     | 0.042836781 |
| 11         | rs4451754  | 0.354839  | 0.311861     | 0.042836781 |
| 13         | rs9551449  | 0.0698925 | 0.0967907    | 0.042836781 |
| 18         | rs7229483  | 0.365591  | 0.321927     | 0.042836781 |
| 20         | rs11906180 | 0.369176  | 0.325843     | 0.042836781 |
| 4          | rs10008032 | 0.433692  | 0.479067     | 0.042860672 |
| 7          | rs7799518  | 0.426259  | 0.38105      | 0.042860672 |
| 2          | rs13009608 | 0.378136  | 0.334697     | 0.042884577 |
| 3          | rs6778030  | 0.517921  | 0.47191      | 0.042884577 |
| 4          | rs7682400  | 0.245487  | 0.207325     | 0.042884577 |
| 5          | rs34115    | 0.34767   | 0.305073     | 0.042884577 |
| 5          | rs2220780  | 0.354839  | 0.399455     | 0.042884577 |
| 7          | rs6971997  | 0.22482   | 0.187798     | 0.042884577 |
| 10         | rs10904886 | 0.189964  | 0.156229     | 0.042884577 |
| 11         | rs11030104 | 0.172043  | 0.209584     | 0.042884577 |
| 11         | rs10769595 | 0.23913   | 0.280908     | 0.042884577 |
| 11         | rs11225307 | 0.270609  | 0.231084     | 0.042884577 |
| 4          | rs7684418  | 0.121864  | 0.0945392    | 0.042908496 |
| 5          | rs10941267 | 0.285971  | 0.329584     | 0.042908496 |
| 6          | rs2268702  | 0.344086  | 0.302112     | 0.042908496 |
| 7          | rs11761669 | 0.426523  | 0.381391     | 0.042908496 |
| 9          | rs10820475 | 0.157706  | 0.126492     | 0.042908496 |
| 11         | rs17489472 | 0.046595  | 0.069506     | 0.042908496 |
| 12         | rs17513656 | 0.0322581 | 0.0527484    | 0.042908496 |
| 15         | rs6422905  | 0.453405  | 0.499149     | 0.042908496 |
| 20         | rs7265126  | 0.4319    | 0.38658      | 0.042908496 |
| 6          | rs16900674 | 0.0989209 | 0.0744717    | 0.042932429 |
| 12         | rs12809711 | 0.099278  | 0.130405     | 0.042932429 |
| 13         | rs2134261  | 0.280576  | 0.323148     | 0.042932429 |
| 22         | rs1016742  | 0.304659  | 0.263875     | 0.042932429 |
| 6          | rs4959530  | 0.399642  | 0.355317     | 0.042956376 |
| 8          | rs10092114 | 0.333333  | 0.37824      | 0.042956376 |
| 8          | rs4560755  | 0.244604  | 0.286006     | 0.042956376 |
| 13         | rs17061643 | 0.0913978 | 0.0681896    | 0.042956376 |

Table DS2: All SNPs tested for association (RDC SABP vs. controls) with the Cochran-Armitage trend test and significant at the p=0.05 threshold.

| chromosome | SNP           | MAF_cases | MAF_controls | p_value     |
|------------|---------------|-----------|--------------|-------------|
| 19         | rs6512130     | 0.53405   | 0.487232     | 0.042956376 |
| 21         | rs9305794     | 0.360215  | 0.40593      | 0.042956376 |
| 8          | rs4739598     | 0.116487  | 0.149762     | 0.042980338 |
| 12         | rs7309630     | 0.145683  | 0.181029     | 0.042980338 |
| 18         | rs7243439     | 0.19964   | 0.239353     | 0.042980338 |
| 18         | rs677101      | 0.310036  | 0.268746     | 0.042980338 |
| 3          | rs940902      | 0.415771  | 0.371039     | 0.043004313 |
| 7          | rs2965606     | 0.296763  | 0.25554      | 0.043004313 |
| 12         | rs11170222    | 0.205776  | 0.245563     | 0.043004313 |
| 18         | rs7234186     | 0.396057  | 0.442118     | 0.043004313 |
| 19         | SNP_A-1819962 | 0.16129   | 0.130153     | 0.043004313 |
| 19         | rs7250408     | 0.376344  | 0.421555     | 0.043004313 |
| 3          | rs980607      | 0.508961  | 0.462995     | 0.043028302 |
| 4          | rs1608687     | 0.0519713 | 0.076358     | 0.043028302 |
| 6          | rs4342445     | 0.206093  | 0.245148     | 0.043028302 |
| 8          | rs268343      | 0.118705  | 0.0918228    | 0.043028302 |
| 12         | rs1471941     | 0.0812274 | 0.10986      | 0.043028302 |
| 15         | rs1995335     | 0.214029  | 0.254174     | 0.043028302 |
| 3          | rs2280384     | 0.44964   | 0.404187     | 0.043052306 |
| 4          | rs17407555    | 0.204301  | 0.244293     | 0.043052306 |
| 4          | rs2609200     | 0.231183  | 0.272232     | 0.043052306 |
| 4          | rs4565050     | 0.329749  | 0.37483      | 0.043052306 |
| 5          | rs1509461     | 0.489247  | 0.442818     | 0.043052306 |
| 7          | rs17792713    | 0.166667  | 0.135015     | 0.043052306 |
| 13         | rs8002020     | 0.09319   | 0.0695297    | 0.043052306 |
| 15         | rs11073668    | 0.378136  | 0.424113     | 0.043052306 |
| 18         | rs12965342    | 0.379928  | 0.425749     | 0.043052306 |
| 22         | rs5749949     | 0.248201  | 0.210221     | 0.043052306 |
| 3          | rs1132202     | 0.15233   | 0.121885     | 0.043076323 |
| 5          | rs2956564     | 0.469314  | 0.423051     | 0.043076323 |
| 8          | rs17799174    | 0.149281  | 0.119324     | 0.043076323 |
| 11         | rs12223055    | 0.379496  | 0.33601      | 0.043076323 |
| 1          | rs6690464     | 0.216846  | 0.180532     | 0.043100355 |
| 3          | rs2938399     | 0.27518   | 0.318012     | 0.043100355 |
| 5          | rs6452185     | 0.0824373 | 0.11166      | 0.043100355 |
| 11         | rs1075749     | 0.489247  | 0.443612     | 0.043100355 |
| 11         | rs11025708    | 0.120072  | 0.152641     | 0.043100355 |
| 13         | rs2503308     | 0.206093  | 0.171039     | 0.043100355 |
| 15         | rs4776572     | 0.0860215 | 0.115162     | 0.043100355 |
| 16         | rs2540726     | 0.120072  | 0.0929279    | 0.043100355 |
| 1          | rs6661547     | 0.148746  | 0.1183       | 0.0431244   |
| 2          | rs16840623    | 0.286738  | 0.330324     | 0.0431244   |
| 3          | rs7340748     | 0.120504  | 0.0932925    | 0.0431244   |
| 6          | rs2076257     | 0.330935  | 0.375341     | 0.0431244   |
| 7          | rs3802095     | 0.386691  | 0.432663     | 0.0431244   |
| 14         | rs8020218     | 0.222222  | 0.262692     | 0.0431244   |
| 21         | rs2837107     | 0.295699  | 0.338501     | 0.0431244   |
| 1          | rs7534557     | 0.123656  | 0.157411     | 0.04314846  |
| 8          | rs1396974     | 0.224014  | 0.187266     | 0.04314846  |
| 12         | rs3741629     | 0.369176  | 0.414792     | 0.04314846  |
| 14         | rs8021151     | 0.401434  | 0.447566     | 0.04314846  |
| 4          | rs906600      | 0.09319   | 0.12287      | 0.043172534 |



Table DS2: All SNPs tested for association (RDC SABP vs. controls) with the Cochran-Armitage trend test and significant at the p=0.05 threshold.

| chromosome | SNP        | MAF_cases | MAF_controls | p_value     |
|------------|------------|-----------|--------------|-------------|
| 4          | rs13116847 | 0.102888  | 0.133685     | 0.043172534 |
| 6          | rs9372634  | 0.216606  | 0.180219     | 0.043172534 |
| 12         | rs10841297 | 0.392473  | 0.349285     | 0.043172534 |
| 16         | rs12919331 | 0.390681  | 0.346744     | 0.043172534 |
| 16         | rs1877354  | 0.421147  | 0.467099     | 0.043172534 |
| 18         | rs7243641  | 0.284946  | 0.245232     | 0.043172534 |
| 5          | rs6580024  | 0.354839  | 0.399352     | 0.043196622 |
| 8          | rs4129418  | 0.541219  | 0.494721     | 0.043196622 |
| 20         | rs16982556 | 0.09319   | 0.0698467    | 0.043196622 |
| 6          | rs2757608  | 0.0878136 | 0.0649063    | 0.043220724 |
| 8          | rs881771   | 0.32554   | 0.371034     | 0.043220724 |
| 8          | rs800911   | 0.197842  | 0.23747      | 0.043220724 |
| 8          | rs6577996  | 0.464158  | 0.418712     | 0.043220724 |
| 10         | rs17821926 | 0.129032  | 0.162581     | 0.043220724 |
| 11         | rs10791000 | 0.213262  | 0.177293     | 0.043220724 |
| 12         | rs4586243  | 0.420863  | 0.375681     | 0.043220724 |
| 14         | rs4904711  | 0.182796  | 0.149592     | 0.043220724 |
| 17         | rs1123024  | 0.252688  | 0.214456     | 0.043220724 |
| 2          | rs1435571  | 0.168459  | 0.20501      | 0.043244841 |
| 5          | rs835088   | 0.11828   | 0.151107     | 0.043244841 |
| 6          | rs7760006  | 0.11828   | 0.0916837    | 0.043244841 |
| 11         | rs8189140  | 0.0467626 | 0.0697001    | 0.043244841 |
| 15         | rs12595731 | 0.123656  | 0.157231     | 0.043244841 |
| 1          | rs7552077  | 0.379928  | 0.42604      | 0.043268971 |
| 3          | rs9843244  | 0.272401  | 0.315269     | 0.043268971 |
| 10         | rs2394213  | 0.0448029 | 0.067586     | 0.043268971 |
| 1          | rs11166473 | 0.0555556 | 0.0802658    | 0.043293116 |
| 2          | rs6743597  | 0.402878  | 0.358044     | 0.043293116 |
| 5          | rs2972357  | 0.367384  | 0.32373      | 0.043293116 |
| 5          | rs6453099  | 0.342294  | 0.386348     | 0.043293116 |
| 5          | rs187568   | 0.278777  | 0.321063     | 0.043293116 |
| 6          | rs6900426  | 0.0806452 | 0.108822     | 0.043293116 |
| 11         | rs11030541 | 0.225632  | 0.266201     | 0.043293116 |
| 13         | rs7322063  | 0.309353  | 0.353542     | 0.043293116 |
| 21         | rs16986002 | 0.078853  | 0.057031     | 0.043293116 |
| 4          | rs582581   | 0.0842294 | 0.0621372    | 0.043317275 |
| 5          | rs7720983  | 0.329749  | 0.287151     | 0.043317275 |
| 6          | rs4133342  | 0.329749  | 0.375        | 0.043317275 |
| 9          | rs10817638 | 0.379928  | 0.335775     | 0.043317275 |
| 11         | rs17352054 | 0.270609  | 0.23111      | 0.043317275 |
| 16         | rs11639836 | 0.0985663 | 0.128922     | 0.043317275 |
| 18         | rs2043687  | 0.105735  | 0.137045     | 0.043317275 |
| 2          | rs17279796 | 0.116487  | 0.089748     | 0.043341448 |
| 9          | rs10901207 | 0.342294  | 0.387223     | 0.043341448 |
| 11         | rs10830716 | 0.107527  | 0.0821124    | 0.043341448 |
| 13         | rs4771207  | 0.172043  | 0.209738     | 0.043341448 |
| 2          | rs4676348  | 0.363799  | 0.409509     | 0.043365635 |
| 7          | rs7804568  | 0.0503597 | 0.0742068    | 0.043365635 |
| 8          | rs2461343  | 0.0519713 | 0.0756904    | 0.043365635 |
| 8          | rs4513159  | 0.267025  | 0.310327     | 0.043365635 |
| 10         | rs7899480  | 0.21147   | 0.250852     | 0.043365635 |
| 13         | rs7997435  | 0.329749  | 0.287781     | 0.043365635 |

Table DS2: All SNPs tested for association (RDC SABP vs. controls) with the Cochran-Armitage trend test and significant at the p=0.05 threshold.

| chromosome | SNP        | MAF_cases | MAF_controls | p_value     |
|------------|------------|-----------|--------------|-------------|
| 18         | rs17340624 | 0.149281  | 0.11908      | 0.043365635 |
| 20         | rs6054271  | 0.449821  | 0.496252     | 0.043365635 |
| 20         | rs6026242  | 0.369176  | 0.325954     | 0.043365635 |
| 3          | rs1559977  | 0.0860215 | 0.0635029    | 0.043389836 |
| 4          | rs2261167  | 0.139785  | 0.110429     | 0.043389836 |
| 7          | rs6970307  | 0.295699  | 0.254598     | 0.043389836 |
| 10         | rs4078278  | 0.155235  | 0.124061     | 0.043389836 |
| 11         | rs591804   | 0.27957   | 0.323148     | 0.043389836 |
| 13         | rs12100414 | 0.163669  | 0.200136     | 0.043389836 |
| 13         | rs9300777  | 0.327338  | 0.371804     | 0.043389836 |
| 15         | rs12438909 | 0.385305  | 0.431105     | 0.043389836 |
| 17         | rs4790084  | 0.333333  | 0.378024     | 0.043389836 |
| 17         | rs16968296 | 0.157706  | 0.127087     | 0.043389836 |
| 2          | rs13013887 | 0.333333  | 0.37777      | 0.043414052 |
| 6          | rs17573347 | 0.0734767 | 0.052883     | 0.043414052 |
| 10         | rs10826588 | 0.143369  | 0.114047     | 0.043414052 |
| 13         | rs9547045  | 0.232014  | 0.273038     | 0.043414052 |
| 18         | rs4800465  | 0.442446  | 0.488392     | 0.043414052 |
| 21         | rs1006601  | 0.320144  | 0.364413     | 0.043414052 |
| 1          | rs6695903  | 0.306452  | 0.264997     | 0.043438282 |
| 4          | rs6848027  | 0.344086  | 0.301568     | 0.043438282 |
| 6          | rs12216336 | 0.356631  | 0.313522     | 0.043438282 |
| 7          | rs10256129 | 0.267986  | 0.22862      | 0.043438282 |
| 12         | rs201412   | 0.107527  | 0.0821684    | 0.043438282 |
| 17         | rs2429424  | 0.536101  | 0.490123     | 0.043438282 |
| 2          | rs17511445 | 0.37276   | 0.418142     | 0.043462526 |
| 5          | rs7732493  | 0.238267  | 0.200853     | 0.043462526 |
| 8          | rs612788   | 0.17446   | 0.142078     | 0.043462526 |
| 12         | rs12581840 | 0.383513  | 0.428766     | 0.043462526 |
| 14         | rs17105278 | 0.24552   | 0.287154     | 0.043462526 |
| 1          | rs12127341 | 0.387097  | 0.432221     | 0.043486784 |
| 6          | rs3127168  | 0.42446   | 0.379275     | 0.043486784 |
| 13         | rs2763419  | 0.501799  | 0.456033     | 0.043486784 |
| 14         | rs12588703 | 0.361011  | 0.318012     | 0.043486784 |
| 14         | rs2180427  | 0.458781  | 0.413288     | 0.043486784 |
| 15         | rs12437836 | 0.483813  | 0.437351     | 0.043486784 |
| 15         | rs4076146  | 0.291367  | 0.251278     | 0.043486784 |
| 20         | rs401976   | 0.535971  | 0.488927     | 0.043486784 |
| 2          | rs2290376  | 0.0878136 | 0.0648842    | 0.043511057 |
| 3          | rs9866193  | 0.278986  | 0.239441     | 0.043511057 |
| 4          | rs17045555 | 0.0698925 | 0.0965271    | 0.043511057 |
| 6          | rs9443493  | 0.327957  | 0.28681      | 0.043511057 |
| 6          | rs7764264  | 0.177419  | 0.144486     | 0.043511057 |
| 7          | rs13233763 | 0.123656  | 0.157016     | 0.043511057 |
| 8          | rs9297599  | 0.40681   | 0.452917     | 0.043511057 |
| 10         | rs10824017 | 0.273381  | 0.234162     | 0.043511057 |
| 3          | rs6784841  | 0.130824  | 0.10235      | 0.043535343 |
| 4          | rs2130928  | 0.0985663 | 0.129346     | 0.043535343 |
| 4          | rs10022638 | 0.344086  | 0.301533     | 0.043535343 |
| 4          | rs13132455 | 0.258065  | 0.219645     | 0.043535343 |
| 7          | rs7778020  | 0.116487  | 0.0895472    | 0.043535343 |
| 15         | rs10220731 | 0.123656  | 0.0963896    | 0.043535343 |

Table DS2: All SNPs tested for association (RDC SABP vs. controls) with the Cochran-Armitage trend test and significant at the p=0.05 threshold.

| chromosome | SNP        | MAF_cases | MAF_controls | p_value     |
|------------|------------|-----------|--------------|-------------|
| 1          | rs2105181  | 0.289568  | 0.332368     | 0.043559644 |
| 2          | rs10180663 | 0.347122  | 0.304066     | 0.043559644 |
| 5          | rs4423955  | 0.367384  | 0.32374      | 0.043559644 |
| 5          | rs2902101  | 0.405018  | 0.450817     | 0.043559644 |
| 6          | rs10485126 | 0.0770609 | 0.105012     | 0.043559644 |
| 10         | rs353186   | 0.233813  | 0.196934     | 0.043559644 |
| 12         | rs12307636 | 0.115108  | 0.0887978    | 0.043559644 |
| 2          | rs10931753 | 0.271583  | 0.314417     | 0.04358396  |
| 2          | rs17266406 | 0.0905797 | 0.0673735    | 0.04358396  |
| 3          | rs6793796  | 0.415468  | 0.370743     | 0.04358396  |
| 10         | rs3011759  | 0.326715  | 0.284838     | 0.04358396  |
| 10         | rs7899233  | 0.494624  | 0.447736     | 0.04358396  |
| 14         | rs2359983  | 0.203237  | 0.243096     | 0.04358396  |
| 20         | rs2328331  | 0.431408  | 0.386085     | 0.04358396  |
| 13         | rs17503174 | 0.134892  | 0.106365     | 0.043608289 |
| 4          | rs11097847 | 0.398917  | 0.354784     | 0.043632633 |
| 10         | rs7893494  | 0.44086   | 0.395642     | 0.043632633 |
| 13         | rs12428926 | 0.393502  | 0.349727     | 0.043632633 |
| 16         | rs4548875  | 0.122744  | 0.156464     | 0.043632633 |
| 2          | rs10196699 | 0.237319  | 0.278518     | 0.043656991 |
| 8          | rs4840487  | 0.406475  | 0.451999     | 0.043656991 |
| 9          | rs10965212 | 0.49639   | 0.450103     | 0.043656991 |
| 10         | rs7092621  | 0.31362   | 0.272898     | 0.043656991 |
| 12         | rs4387413  | 0.23741   | 0.200545     | 0.043656991 |
| 14         | rs2014418  | 0.0770609 | 0.105559     | 0.043656991 |
| 1          | rs12563349 | 0.255396  | 0.21731      | 0.043681364 |
| 8          | rs9283946  | 0.426523  | 0.472885     | 0.043681364 |
| 14         | rs8004607  | 0.0770609 | 0.105147     | 0.043681364 |
| 18         | rs7506314  | 0.12724   | 0.160422     | 0.043681364 |
| 19         | rs3826818  | 0.121864  | 0.0946776    | 0.043681364 |
| 1          | rs10494390 | 0.224014  | 0.188351     | 0.043705751 |
| 5          | rs7731706  | 0.517921  | 0.471721     | 0.043705751 |
| 7          | rs799959   | 0.234767  | 0.275204     | 0.043705751 |
| 7          | rs7802958  | 0.422939  | 0.378323     | 0.043705751 |
| 11         | rs217062   | 0.28777   | 0.247613     | 0.043705751 |
| 13         | rs1330518  | 0.43705   | 0.391993     | 0.043705751 |
| 1          | rs1770887  | 0.208633  | 0.248807     | 0.043730152 |
| 1          | rs573277   | 0.0519713 | 0.0762018    | 0.043730152 |
| 3          | rs10511387 | 0.141577  | 0.112095     | 0.043730152 |
| 4          | rs10010423 | 0.111111  | 0.143052     | 0.043730152 |
| 7          | rs4947477  | 0.532258  | 0.486896     | 0.043730152 |
| 8          | rs17420284 | 0.172043  | 0.209057     | 0.043730152 |
| 9          | rs320939   | 0.15233   | 0.187905     | 0.043730152 |
| 13         | rs9507460  | 0.179211  | 0.21611      | 0.043730152 |
| 20         | rs17123973 | 0.0752688 | 0.103177     | 0.043730152 |
| 20         | rs4494823  | 0.240942  | 0.281676     | 0.043730152 |
| 3          | rs9827120  | 0.247312  | 0.209881     | 0.043754567 |
| 4          | rs721330   | 0.270609  | 0.313351     | 0.043754567 |
| 9          | rs1412096  | 0.27518   | 0.317888     | 0.043754567 |
| 1          | rs17131516 | 0.0985663 | 0.0740362    | 0.043778997 |
| 4          | rs11131822 | 0.20471   | 0.244543     | 0.043778997 |
| 7          | rs10255638 | 0.426523  | 0.381521     | 0.043778997 |

Table DS2: All SNPs tested for association (RDC SABP vs. controls) with the Cochran-Armitage trend test and significant at the p=0.05 threshold.

| chromosome | SNP           | MAF_cases | MAF_controls | p_value     |
|------------|---------------|-----------|--------------|-------------|
| 8          | rs12546368    | 0.163082  | 0.199591     | 0.043778997 |
| 10         | rs12411829    | 0.133094  | 0.167405     | 0.043778997 |
| 12         | rs10851005    | 0.232975  | 0.196386     | 0.043778997 |
| 14         | rs4906395     | 0.424731  | 0.380109     | 0.043778997 |
| 15         | rs4923776     | 0.123656  | 0.0964103    | 0.043778997 |
| 16         | rs4889032     | 0.282374  | 0.242682     | 0.043778997 |
| 4          | SNP_A-4247401 | 0.206093  | 0.245145     | 0.043803441 |
| 5          | rs307197      | 0.410394  | 0.36602      | 0.043803441 |
| 9          | rs7019926     | 0.160072  | 0.196489     | 0.043803441 |
| 21         | rs229116      | 0.437276  | 0.483657     | 0.043803441 |
| 1          | rs7533521     | 0.492832  | 0.446794     | 0.0438279   |
| 3          | rs2126071     | 0.415771  | 0.371171     | 0.0438279   |
| 5          | rs200090      | 0.202509  | 0.168256     | 0.0438279   |
| 2          | rs10206020    | 0.168459  | 0.206093     | 0.043852372 |
| 3          | rs16852039    | 0.11828   | 0.151004     | 0.043852372 |
| 11         | rs11030102    | 0.295699  | 0.254685     | 0.043852372 |
| 14         | rs11621118    | 0.327957  | 0.372315     | 0.043852372 |
| 21         | rs765311      | 0.356631  | 0.402631     | 0.043852372 |
| 1          | rs1911980     | 0.338129  | 0.383044     | 0.04387686  |
| 1          | rs2799511     | 0.116487  | 0.148907     | 0.04387686  |
| 5          | rs2248877     | 0.467626  | 0.422408     | 0.04387686  |
| 8          | rs1838424     | 0.451613  | 0.498127     | 0.04387686  |
| 13         | rs1924381     | 0.0913978 | 0.120825     | 0.04387686  |
| 2          | rs2192459     | 0.510753  | 0.464395     | 0.043901361 |
| 3          | rs352275      | 0.188172  | 0.154632     | 0.043901361 |
| 7          | rs11760818    | 0.52509   | 0.478876     | 0.043901361 |
| 8          | rs7017739     | 0.0971223 | 0.128022     | 0.043901361 |
| 8          | rs4737996     | 0.234767  | 0.275656     | 0.043901361 |
| 8          | rs1909024     | 0.150538  | 0.186221     | 0.043901361 |
| 16         | rs274074      | 0.132616  | 0.166383     | 0.043901361 |
| 1          | rs6425866     | 0.0394265 | 0.0611793    | 0.043925877 |
| 2          | rs6718624     | 0.0645161 | 0.0905995    | 0.043925877 |
| 3          | rs7647840     | 0.352518  | 0.31028      | 0.043925877 |
| 5          | rs17219934    | 0.222222  | 0.185967     | 0.043925877 |
| 8          | rs17353229    | 0.0863309 | 0.0637389    | 0.043925877 |
| 11         | rs7104601     | 0.0985663 | 0.12951      | 0.043925877 |
| 11         | rs6590734     | 0.105735  | 0.137215     | 0.043925877 |
| 12         | rs2639101     | 0.143369  | 0.178255     | 0.043925877 |
| 13         | rs7993502     | 0.277778  | 0.320171     | 0.043925877 |
| 15         | rs11855082    | 0.141577  | 0.176431     | 0.043925877 |
| 15         | rs16975142    | 0.101083  | 0.0765167    | 0.043925877 |
| 2          | rs12469850    | 0.219424  | 0.183572     | 0.043950408 |
| 4          | rs4956324     | 0.21147   | 0.250936     | 0.043950408 |
| 4          | rs295237      | 0.302158  | 0.345498     | 0.043950408 |
| 6          | rs234932      | 0.272401  | 0.233299     | 0.043950408 |
| 6          | rs2397146     | 0.240072  | 0.281505     | 0.043950408 |
| 17         | rs12325830    | 0.383513  | 0.429107     | 0.043950408 |
| 19         | rs12609653    | 0.130824  | 0.164906     | 0.043950408 |
| 20         | rs6111267     | 0.444444  | 0.490634     | 0.043950408 |
| 3          | rs12494257    | 0.154122  | 0.123806     | 0.043974953 |
| 11         | rs1979579     | 0.498188  | 0.452129     | 0.043974953 |
| 11         | rs11237934    | 0.159498  | 0.128489     | 0.043974953 |

Table DS2: All SNPs tested for association (RDC SABP vs. controls) with the Cochran-Armitage trend test and significant at the p=0.05 threshold.

| chromosome | SNP        | MAF_cases | MAF_controls | p_value     |
|------------|------------|-----------|--------------|-------------|
| 10         | rs11254592 | 0.210432  | 0.249659     | 0.043999512 |
| 12         | rs7977673  | 0.259857  | 0.302112     | 0.043999512 |
| 16         | rs1424064  | 0.431408  | 0.386426     | 0.043999512 |
| 17         | rs10459963 | 0.118705  | 0.151278     | 0.043999512 |
| 6          | rs2326359  | 0.444444  | 0.49047      | 0.044024086 |
| 8          | rs16936814 | 0.0698925 | 0.0496937    | 0.044024086 |
| 8          | rs1357037  | 0.0431655 | 0.0655067    | 0.044024086 |
| 10         | rs7089353  | 0.134892  | 0.168597     | 0.044024086 |
| 11         | rs7935077  | 0.369176  | 0.414593     | 0.044024086 |
| 13         | rs2025245  | 0.125448  | 0.158773     | 0.044024086 |
| 2          | rs6755563  | 0.197133  | 0.162858     | 0.044048674 |
| 2          | rs4973124  | 0.241935  | 0.283572     | 0.044048674 |
| 3          | rs907080   | 0.33574   | 0.37998      | 0.044048674 |
| 4          | rs1376416  | 0.437276  | 0.483481     | 0.044048674 |
| 4          | rs6816578  | 0.103943  | 0.0790191    | 0.044048674 |
| 5          | rs7735696  | 0.354839  | 0.399183     | 0.044048674 |
| 6          | rs991884   | 0.410394  | 0.456588     | 0.044048674 |
| 6          | rs4479964  | 0.38172   | 0.337995     | 0.044048674 |
| 8          | rs7461939  | 0.397849  | 0.353663     | 0.044048674 |
| 12         | rs1260868  | 0.227599  | 0.191757     | 0.044048674 |
| 18         | rs1377168  | 0.200361  | 0.239871     | 0.044048674 |
| 21         | rs7276900  | 0.317204  | 0.27598      | 0.044048674 |
| 2          | rs335136   | 0.114695  | 0.147139     | 0.044073277 |
| 6          | rs9276448  | 0.0985663 | 0.0744536    | 0.044073277 |
| 6          | rs4707969  | 0.526882  | 0.48119      | 0.044073277 |
| 21         | rs2830457  | 0.289568  | 0.250085     | 0.044073277 |
| 4          | rs17675093 | 0.270609  | 0.313288     | 0.044097894 |
| 1          | rs7538474  | 0.483813  | 0.439099     | 0.044122525 |
| 1          | rs3003888  | 0.27957   | 0.322597     | 0.044122525 |
| 7          | rs6959643  | 0.363799  | 0.40923      | 0.044122525 |
| 9          | rs10975080 | 0.251799  | 0.293274     | 0.044122525 |
| 10         | rs11011694 | 0.342294  | 0.386085     | 0.044122525 |
| 12         | rs1866072  | 0.362007  | 0.319544     | 0.044122525 |
| 20         | rs6136490  | 0.4319    | 0.386844     | 0.044122525 |
| 1          | rs6429769  | 0.306452  | 0.265146     | 0.044147171 |
| 4          | rs4307037  | 0.301075  | 0.345169     | 0.044147171 |
| 4          | rs12498537 | 0.0665468 | 0.0932607    | 0.044147171 |
| 8          | rs17089187 | 0.122302  | 0.095498     | 0.044147171 |
| 15         | rs7162847  | 0.141577  | 0.17631      | 0.044147171 |
| 20         | rs6136062  | 0.0645161 | 0.0902896    | 0.044147171 |
| 3          | rs2268845  | 0.353047  | 0.397921     | 0.044171832 |
| 6          | rs13207114 | 0.37276   | 0.418256     | 0.044171832 |
| 9          | rs12708304 | 0.38172   | 0.427818     | 0.044171832 |
| 11         | rs7482531  | 0.182796  | 0.220633     | 0.044171832 |
| 12         | rs3741630  | 0.369176  | 0.414539     | 0.044171832 |
| 13         | rs7994467  | 0.170251  | 0.207238     | 0.044171832 |
| 14         | rs12432533 | 0.408602  | 0.364179     | 0.044171832 |
| 16         | rs12917927 | 0.175627  | 0.213386     | 0.044171832 |
| 17         | rs11651994 | 0.281362  | 0.241743     | 0.044171832 |
| 2          | rs1097479  | 0.0809353 | 0.10971      | 0.044196507 |
| 3          | rs155268   | 0.232852  | 0.196282     | 0.044196507 |
| 3          | rs12493681 | 0.22482   | 0.265497     | 0.044196507 |

Table DS2: All SNPs tested for association (RDC SABP vs. controls) with the Cochran-Armitage trend test and significant at the p=0.05 threshold.

| chromosome | SNP        | MAF_cases | MAF_controls | p_value     |
|------------|------------|-----------|--------------|-------------|
| 4          | rs11100358 | 0.301075  | 0.260662     | 0.044196507 |
| 17         | rs6501825  | 0.16129   | 0.130279     | 0.044196507 |
| 3          | rs4678135  | 0.229391  | 0.270755     | 0.044221196 |
| 5          | rs26923    | 0.0591398 | 0.083959     | 0.044221196 |
| 8          | rs16936812 | 0.0698925 | 0.0497106    | 0.044221196 |
| 11         | rs2512782  | 0.172043  | 0.208759     | 0.044221196 |
| 11         | rs7342241  | 0.202509  | 0.241738     | 0.044221196 |
| 12         | rs11105196 | 0.259857  | 0.221105     | 0.044221196 |
| 12         | rs10859064 | 0.530576  | 0.484168     | 0.044221196 |
| 17         | rs9898437  | 0.430108  | 0.384458     | 0.044221196 |
| 2          | rs6432366  | 0.439068  | 0.393903     | 0.0442459   |
| 2          | rs12613431 | 0.270609  | 0.231071     | 0.0442459   |
| 4          | rs1960734  | 0.368705  | 0.413646     | 0.0442459   |
| 5          | rs10473857 | 0.252688  | 0.214773     | 0.0442459   |
| 5          | rs436495   | 0.18231   | 0.220859     | 0.0442459   |
| 6          | rs629648   | 0.390681  | 0.43654      | 0.0442459   |
| 1          | rs2421790  | 0.426259  | 0.380879     | 0.044270619 |
| 2          | rs16984087 | 0.121864  | 0.0946222    | 0.044270619 |
| 8          | rs1473482  | 0.104317  | 0.0792434    | 0.044270619 |
| 11         | rs17827627 | 0.120072  | 0.153295     | 0.044270619 |
| 14         | rs11620623 | 0.235612  | 0.276221     | 0.044270619 |
| 1          | rs6670259  | 0.304659  | 0.263714     | 0.044295352 |
| 4          | rs17478453 | 0.284173  | 0.244463     | 0.044295352 |
| 4          | rs17040439 | 0.198925  | 0.164624     | 0.044295352 |
| 16         | rs9924288  | 0.103943  | 0.0787589    | 0.044295352 |
| 18         | rs9944842  | 0.349462  | 0.39428      | 0.044295352 |
| 1          | rs12146022 | 0.123656  | 0.157177     | 0.0443201   |
| 2          | rs6721228  | 0.32554   | 0.370307     | 0.0443201   |
| 4          | rs1846874  | 0.385305  | 0.341567     | 0.0443201   |
| 6          | rs2317964  | 0.170251  | 0.207737     | 0.0443201   |
| 6          | rs9376026  | 0.378136  | 0.423628     | 0.0443201   |
| 8          | rs17755291 | 0.154122  | 0.123891     | 0.0443201   |
| 9          | rs4310257  | 0.345878  | 0.304125     | 0.0443201   |
| 12         | rs7137096  | 0.276364  | 0.236708     | 0.0443201   |
| 14         | rs12586945 | 0.413978  | 0.459796     | 0.0443201   |
| 5          | rs13154957 | 0.392473  | 0.438501     | 0.044344862 |
| 10         | rs17150540 | 0.0322581 | 0.052506     | 0.044344862 |
| 1          | rs3748550  | 0.139785  | 0.174728     | 0.044369639 |
| 2          | rs12472523 | 0.403226  | 0.358822     | 0.044369639 |
| 2          | rs4671693  | 0.22043   | 0.184686     | 0.044369639 |
| 2          | rs3771515  | 0.0842294 | 0.112931     | 0.044369639 |
| 2          | rs6434219  | 0.271583  | 0.314334     | 0.044369639 |
| 6          | rs4506044  | 0.0899281 | 0.11955      | 0.044369639 |
| 9          | rs4745454  | 0.177419  | 0.144683     | 0.044369639 |
| 10         | rs11191393 | 0.112903  | 0.145073     | 0.044369639 |
| 11         | rs12289486 | 0.137993  | 0.109066     | 0.044369639 |
| 14         | rs12890287 | 0.112903  | 0.0864828    | 0.044369639 |
| 15         | rs2046389  | 0.146209  | 0.116672     | 0.044369639 |
| 3          | rs2873617  | 0.0501792 | 0.0740109    | 0.04439443  |
| 6          | rs2306290  | 0.397849  | 0.354273     | 0.04439443  |
| 12         | rs6487487  | 0.428315  | 0.383685     | 0.04439443  |
| 1          | rs10911810 | 0.52509   | 0.479557     | 0.044419236 |

Table DS2: All SNPs tested for association (RDC SABP vs. controls) with the Cochran-Armitage trend test and significant at the p=0.05 threshold.

| chromosome | SNP           | MAF_cases | MAF_controls | p_value     |
|------------|---------------|-----------|--------------|-------------|
| 6          | rs7752872     | 0.430108  | 0.38514      | 0.044419236 |
| 7          | rs6466968     | 0.426523  | 0.381682     | 0.044419236 |
| 10         | rs7921263     | 0.467742  | 0.422972     | 0.044419236 |
| 10         | rs1925636     | 0.451439  | 0.49778      | 0.044419236 |
| 12         | rs904401      | 0.111511  | 0.0858311    | 0.044419236 |
| 15         | rs3816104     | 0.386282  | 0.432004     | 0.044419236 |
| 22         | rs5761869     | 0.103943  | 0.0789653    | 0.044419236 |
| 2          | rs12612472    | 0.0806452 | 0.0587432    | 0.044444057 |
| 2          | rs13415095    | 0.464029  | 0.418771     | 0.044444057 |
| 3          | rs1500425     | 0.366906  | 0.411955     | 0.044444057 |
| 5          | rs7168        | 0.220217  | 0.260498     | 0.044444057 |
| 6          | rs4395718     | 0.163082  | 0.199625     | 0.044444057 |
| 6          | rs11760007    | 0.401434  | 0.357581     | 0.044444057 |
| 18         | rs876141      | 0.09319   | 0.123425     | 0.044444057 |
| 1          | rs11581697    | 0.173835  | 0.21161      | 0.044468892 |
| 1          | rs1287809     | 0.232852  | 0.195941     | 0.044468892 |
| 4          | rs2736463     | 0.390681  | 0.34753      | 0.044468892 |
| 6          | rs9355742     | 0.206093  | 0.244888     | 0.044468892 |
| 7          | rs2107806     | 0.311828  | 0.355877     | 0.044468892 |
| 7          | rs6462079     | 0.301075  | 0.26047      | 0.044468892 |
| 7          | rs847572      | 0.120072  | 0.0934516    | 0.044468892 |
| 10         | rs1911320     | 0.0448029 | 0.0674387    | 0.044468892 |
| 10         | rs1436802     | 0.175627  | 0.143465     | 0.044468892 |
| 14         | rs758240      | 0.327957  | 0.372188     | 0.044468892 |
| 2          | rs10184199    | 0.514337  | 0.468303     | 0.044493741 |
| 3          | rs17039550    | 0.0681004 | 0.094346     | 0.044493741 |
| 3          | rs6808673     | 0.489247  | 0.443441     | 0.044493741 |
| 3          | rs833637      | 0.206093  | 0.245575     | 0.044493741 |
| 5          | rs212995      | 0.462366  | 0.416922     | 0.044493741 |
| 15         | rs2970359     | 0.222222  | 0.26227      | 0.044493741 |
| 2          | rs10174079    | 0.369176  | 0.325383     | 0.044518606 |
| 6          | rs2211142     | 0.269784  | 0.230402     | 0.044518606 |
| 13         | rs6561296     | 0.182796  | 0.220463     | 0.044518606 |
| 18         | rs10460085    | 0.375899  | 0.332255     | 0.044518606 |
| 1          | rs3754515     | 0.492832  | 0.446965     | 0.044543485 |
| 3          | rs2953036     | 0.402878  | 0.448264     | 0.044543485 |
| 9          | rs11144870    | 0.227599  | 0.267656     | 0.044543485 |
| 10         | rs6482959     | 0.130824  | 0.164734     | 0.044543485 |
| 11         | rs671134      | 0.0448029 | 0.0677562    | 0.044543485 |
| 16         | rs4785146     | 0.456989  | 0.412035     | 0.044543485 |
| 1          | rs7533588     | 0.392086  | 0.437159     | 0.044568378 |
| 3          | rs5027900     | 0.336918  | 0.294881     | 0.044568378 |
| 6          | rs9366344     | 0.433692  | 0.389002     | 0.044568378 |
| 6          | rs9380406     | 0.44964   | 0.404462     | 0.044568378 |
| 8          | rs17117843    | 0.374552  | 0.331457     | 0.044568378 |
| 8          | rs4735359     | 0.179211  | 0.146117     | 0.044568378 |
| 10         | rs4750655     | 0.148746  | 0.11895      | 0.044568378 |
| 12         | rs11049416    | 0.335125  | 0.294007     | 0.044568378 |
| 15         | rs2445766     | 0.214029  | 0.178596     | 0.044568378 |
| 20         | rs6105279     | 0.142086  | 0.176711     | 0.044568378 |
| 4          | rs17024456    | 0.141577  | 0.176902     | 0.044593287 |
| 4          | SNP_A-1955690 | 0.155914  | 0.12517      | 0.044593287 |

Table DS2: All SNPs tested for association (RDC SABP vs. controls) with the Cochran-Armitage trend test and significant at the p=0.05 threshold.

| chromosome | SNP        | MAF_cases | MAF_controls | p_value     |
|------------|------------|-----------|--------------|-------------|
| 5          | rs6882373  | 0.0412186 | 0.0633299    | 0.044593287 |
| 9          | rs1832746  | 0.15233   | 0.121935     | 0.044593287 |
| 9          | rs7853196  | 0.298561  | 0.257576     | 0.044593287 |
| 17         | rs17226179 | 0.523297  | 0.47718      | 0.044593287 |
| 1          | rs7531944  | 0.21147   | 0.250681     | 0.044618209 |
| 4          | rs2391121  | 0.428315  | 0.383237     | 0.044618209 |
| 5          | rs4389663  | 0.154122  | 0.189567     | 0.044618209 |
| 6          | rs1543731  | 0.256272  | 0.297749     | 0.044618209 |
| 6          | rs2579989  | 0.073741  | 0.101464     | 0.044618209 |
| 11         | rs2034325  | 0.253597  | 0.215746     | 0.044618209 |
| 15         | rs940971   | 0.141577  | 0.17631      | 0.044618209 |
| 16         | rs6565143  | 0.292115  | 0.33515      | 0.044618209 |
| 6          | rs9356708  | 0.275986  | 0.318539     | 0.044643147 |
| 9          | rs16932354 | 0.118705  | 0.0913429    | 0.044643147 |
| 9          | rs7861466  | 0.326165  | 0.284277     | 0.044643147 |
| 10         | rs1911318  | 0.0448029 | 0.0674157    | 0.044643147 |
| 10         | rs10884544 | 0.388087  | 0.344687     | 0.044643147 |
| 11         | rs919907   | 0.453405  | 0.498979     | 0.044643147 |
| 14         | rs8009841  | 0.311828  | 0.355635     | 0.044643147 |
| 15         | rs4924678  | 0.27518   | 0.235695     | 0.044643147 |
| 15         | rs7174515  | 0.202509  | 0.241655     | 0.044643147 |
| 2          | rs1597908  | 0.0845324 | 0.113365     | 0.044668099 |
| 2          | rs4954095  | 0.505396  | 0.459625     | 0.044668099 |
| 4          | rs4498120  | 0.0863309 | 0.115463     | 0.044668099 |
| 6          | rs7772252  | 0.0451264 | 0.0682669    | 0.044668099 |
| 10         | rs7099222  | 0.360215  | 0.317485     | 0.044668099 |
| 12         | rs11615045 | 0.324373  | 0.368143     | 0.044668099 |
| 2          | rs309294   | 0.394265  | 0.439394     | 0.044693066 |
| 4          | rs2736467  | 0.390681  | 0.347582     | 0.044693066 |
| 5          | rs17691584 | 0.136691  | 0.171341     | 0.044693066 |
| 8          | rs1003316  | 0.259857  | 0.301704     | 0.044693066 |
| 15         | rs1693507  | 0.142086  | 0.176892     | 0.044693066 |
| 1          | rs4951588  | 0.442652  | 0.397174     | 0.044718048 |
| 2          | rs10164874 | 0.532258  | 0.48586      | 0.044718048 |
| 3          | rs703170   | 0.323741  | 0.367486     | 0.044718048 |
| 4          | rs9990512  | 0.0591398 | 0.0841854    | 0.044718048 |
| 5          | rs10040826 | 0.238351  | 0.201327     | 0.044718048 |
| 5          | rs1301064  | 0.455197  | 0.501022     | 0.044718048 |
| 6          | rs9391430  | 0.265233  | 0.226219     | 0.044718048 |
| 6          | rs13199882 | 0.0448029 | 0.0672126    | 0.044718048 |
| 8          | rs2460229  | 0.0341727 | 0.0550068    | 0.044718048 |
| 16         | rs158481   | 0.265233  | 0.307391     | 0.044718048 |
| 16         | rs12922654 | 0.451439  | 0.406644     | 0.044718048 |
| 1          | rs1407122  | 0.442652  | 0.488598     | 0.044743044 |
| 5          | rs10514242 | 0.267986  | 0.229458     | 0.044743044 |
| 7          | rs3112353  | 0.460573  | 0.415702     | 0.044743044 |
| 10         | rs17688707 | 0.111111  | 0.0851245    | 0.044743044 |
| 12         | rs671401   | 0.115108  | 0.147832     | 0.044743044 |
| 2          | rs6708638  | 0.129496  | 0.101669     | 0.044768055 |
| 20         | rs968323   | 0.393885  | 0.350051     | 0.044768055 |
| 7          | rs10225559 | 0.202509  | 0.241826     | 0.044793081 |
| 8          | rs10098878 | 0.464158  | 0.419223     | 0.044793081 |



Table DS2: All SNPs tested for association (RDC SABP vs. controls) with the Cochran-Armitage trend test and significant at the p=0.05 threshold.

| chromosome | SNP        | MAF_cases | MAF_controls | p_value     |
|------------|------------|-----------|--------------|-------------|
| 9          | rs1443363  | 0.37276   | 0.417745     | 0.044793081 |
| 1          | rs4908526  | 0.343525  | 0.387772     | 0.044818122 |
| 1          | rs16823549 | 0.078853  | 0.107399     | 0.044818122 |
| 1          | rs10889252 | 0.426523  | 0.472563     | 0.044818122 |
| 2          | rs4853583  | 0.372302  | 0.417433     | 0.044818122 |
| 4          | rs17233629 | 0.293907  | 0.254006     | 0.044818122 |
| 5          | rs465997   | 0.163669  | 0.199626     | 0.044818122 |
| 12         | rs729784   | 0.21223   | 0.176962     | 0.044818122 |
| 13         | rs10887    | 0.24552   | 0.286517     | 0.044818122 |
| 2          | rs11694445 | 0.304659  | 0.263884     | 0.044843177 |
| 2          | rs2315523  | 0.232975  | 0.273501     | 0.044843177 |
| 8          | rs12676995 | 0.351986  | 0.30971      | 0.044843177 |
| 8          | rs11784698 | 0.276173  | 0.23677      | 0.044843177 |
| 8          | rs2294088  | 0.311151  | 0.270386     | 0.044843177 |
| 9          | rs7040903  | 0.430108  | 0.475136     | 0.044843177 |
| 12         | rs11058591 | 0.275986  | 0.318863     | 0.044843177 |
| 17         | rs16943126 | 0.032491  | 0.0528109    | 0.044843177 |
| 5          | rs1580847  | 0.36413   | 0.32088      | 0.044868247 |
| 5          | rs3828668  | 0.177419  | 0.145024     | 0.044868247 |
| 13         | rs9514645  | 0.419355  | 0.4647       | 0.044868247 |
| 20         | rs512870   | 0.487455  | 0.442138     | 0.044868247 |
| 4          | rs6815622  | 0.215054  | 0.179666     | 0.044893332 |
| 7          | rs2162563  | 0.212996  | 0.252553     | 0.044893332 |
| 10         | rs6481515  | 0.166667  | 0.203609     | 0.044893332 |
| 21         | rs2834429  | 0.271583  | 0.313756     | 0.044893332 |
| 11         | rs10501215 | 0.268817  | 0.229983     | 0.044918431 |
| 15         | rs940972   | 0.141577  | 0.17626      | 0.044918431 |
| 16         | rs17637903 | 0.0967742 | 0.127301     | 0.044918431 |
| 4          | rs13106265 | 0.252688  | 0.214942     | 0.044943545 |
| 5          | rs2731858  | 0.23741   | 0.200341     | 0.044943545 |
| 6          | rs12199692 | 0.356115  | 0.313288     | 0.044943545 |
| 7          | rs4731867  | 0.181655  | 0.219612     | 0.044943545 |
| 16         | rs4781324  | 0.388889  | 0.434175     | 0.044943545 |
| 4          | rs9312534  | 0.480287  | 0.434879     | 0.044968674 |
| 6          | rs12196205 | 0.118705  | 0.150869     | 0.044968674 |
| 8          | rs17076021 | 0.0521583 | 0.0756231    | 0.044968674 |
| 9          | rs3750454  | 0.333333  | 0.291993     | 0.044968674 |
| 10         | rs10823753 | 0.347122  | 0.305111     | 0.044968674 |
| 11         | rs2445296  | 0.34296   | 0.301057     | 0.044968674 |
| 13         | rs17383459 | 0.188172  | 0.226296     | 0.044968674 |
| 16         | rs17796442 | 0.446043  | 0.491823     | 0.044968674 |
| 17         | rs636000   | 0.3213    | 0.280068     | 0.044968674 |
| 21         | rs2838325  | 0.482079  | 0.436159     | 0.044968674 |
| 3          | rs17678713 | 0.163082  | 0.131561     | 0.044993818 |
| 3          | rs6782479  | 0.397482  | 0.353092     | 0.044993818 |
| 4          | rs13137613 | 0.312274  | 0.355779     | 0.044993818 |
| 8          | rs9329247  | 0.188172  | 0.154685     | 0.044993818 |
| 10         | rs11002792 | 0.365591  | 0.322998     | 0.044993818 |
| 10         | rs7899611  | 0.21147   | 0.250511     | 0.044993818 |
| 11         | rs11025718 | 0.120072  | 0.152248     | 0.044993818 |
| 11         | rs3847524  | 0.541219  | 0.495571     | 0.044993818 |
| 17         | rs1979276  | 0.359712  | 0.317281     | 0.044993818 |

Table DS2: All SNPs tested for association (RDC SABP vs. controls) with the Cochran-Armitage trend test and significant at the p=0.05 threshold.

| chromosome | SNP           | MAF_cases | MAF_controls | p_value     |
|------------|---------------|-----------|--------------|-------------|
| 21         | rs1452094     | 0.347122  | 0.391763     | 0.044993818 |
| 5          | rs16885512    | 0.0539568 | 0.0780396    | 0.045018977 |
| 5          | rs17084852    | 0.113309  | 0.144804     | 0.045018977 |
| 5          | rs4921308     | 0.412186  | 0.457425     | 0.045018977 |
| 7          | rs4719433     | 0.501792  | 0.456574     | 0.045018977 |
| 7          | rs4606009     | 0.0394265 | 0.0606267    | 0.045018977 |
| 7          | rs13242757    | 0.379928  | 0.336745     | 0.045018977 |
| 2          | rs1364054     | 0.363799  | 0.320723     | 0.04504415  |
| 2          | rs7599132     | 0.168459  | 0.204801     | 0.04504415  |
| 3          | rs9859928     | 0.324373  | 0.368601     | 0.04504415  |
| 6          | rs1265248     | 0.0913978 | 0.121124     | 0.04504415  |
| 6          | rs9400365     | 0.333333  | 0.290943     | 0.04504415  |
| 8          | rs11996503    | 0.0448029 | 0.067563     | 0.04504415  |
| 18         | rs6506901     | 0.482014  | 0.435945     | 0.04504415  |
| 20         | rs6133716     | 0.107527  | 0.08197      | 0.04504415  |
| 20         | rs4815222     | 0.265233  | 0.227149     | 0.04504415  |
| 5          | rs17083155    | 0.111111  | 0.0855779    | 0.045069339 |
| 8          | rs1015028     | 0.378136  | 0.423169     | 0.045069339 |
| 10         | rs12356817    | 0.143369  | 0.178255     | 0.045069339 |
| 10         | rs4751472     | 0.133574  | 0.167917     | 0.045069339 |
| 12         | rs697209      | 0.191756  | 0.230167     | 0.045069339 |
| 16         | rs11649147    | 0.203237  | 0.242507     | 0.045069339 |
| 19         | rs402744      | 0.117329  | 0.0905834    | 0.045069339 |
| 1          | rs9436287     | 0.419355  | 0.464652     | 0.045094542 |
| 2          | rs13385748    | 0.208633  | 0.173647     | 0.045094542 |
| 9          | rs6560571     | 0.438628  | 0.484838     | 0.045094542 |
| 11         | rs4923623     | 0.369176  | 0.41431      | 0.045094542 |
| 12         | rs10860441    | 0.142086  | 0.176671     | 0.045094542 |
| 1          | rs16827008    | 0.173835  | 0.141738     | 0.04511976  |
| 4          | rs16891234    | 0.184588  | 0.222809     | 0.04511976  |
| 4          | rs6834659     | 0.323105  | 0.366929     | 0.04511976  |
| 11         | rs11038404    | 0.0881295 | 0.0649284    | 0.04511976  |
| 12         | rs10783197    | 0.195341  | 0.233742     | 0.04511976  |
| 16         | rs2287998     | 0.473022  | 0.426892     | 0.04511976  |
| 2          | rs995407      | 0.19964   | 0.238509     | 0.045144993 |
| 2          | rs4664103     | 0.148746  | 0.11878      | 0.045144993 |
| 2          | rs6717111     | 0.224014  | 0.263955     | 0.045144993 |
| 3          | rs6799404     | 0.140794  | 0.111584     | 0.045144993 |
| 4          | SNP_A-4210654 | 0.301075  | 0.260818     | 0.045144993 |
| 4          | rs11736556    | 0.146953  | 0.181988     | 0.045144993 |
| 7          | rs705326      | 0.437276  | 0.482806     | 0.045144993 |
| 11         | rs4923622     | 0.370968  | 0.416042     | 0.045144993 |
| 13         | rs4603426     | 0.301075  | 0.261151     | 0.045144993 |
| 16         | rs12935313    | 0.354839  | 0.311819     | 0.045144993 |
| 1          | rs3754507     | 0.302867  | 0.262343     | 0.04517024  |
| 8          | rs13251380    | 0.245487  | 0.286567     | 0.04517024  |
| 9          | rs4548236     | 0.260791  | 0.222582     | 0.04517024  |
| 12         | rs10841296    | 0.392473  | 0.349591     | 0.04517024  |
| 1          | rs18582       | 0.336918  | 0.38045      | 0.045195503 |
| 5          | rs255739      | 0.426523  | 0.472042     | 0.045195503 |
| 6          | rs568675      | 0.394265  | 0.440075     | 0.045195503 |
| 14         | rs11622600    | 0.111511  | 0.0854074    | 0.045195503 |

Table DS2: All SNPs tested for association (RDC SABP vs. controls) with the Cochran-Armitage trend test and significant at the p=0.05 threshold.

| chromosome | SNP        | MAF_cases | MAF_controls | p_value     |
|------------|------------|-----------|--------------|-------------|
| 14         | rs4904488  | 0.415468  | 0.461105     | 0.045195503 |
| 19         | rs11669127 | 0.151079  | 0.186649     | 0.045195503 |
| 1          | rs6663410  | 0.394265  | 0.349607     | 0.04522078  |
| 2          | rs2048178  | 0.378136  | 0.334811     | 0.04522078  |
| 2          | rs16825347 | 0.240143  | 0.281644     | 0.04522078  |
| 3          | rs7644167  | 0.0483871 | 0.0716724    | 0.04522078  |
| 3          | rs4678136  | 0.229391  | 0.270344     | 0.04522078  |
| 3          | rs2139566  | 0.261649  | 0.222563     | 0.04522078  |
| 4          | rs372903   | 0.329137  | 0.28686      | 0.04522078  |
| 5          | rs13360743 | 0.0824373 | 0.111149     | 0.04522078  |
| 6          | rs1847912  | 0.21223   | 0.251704     | 0.04522078  |
| 8          | rs6601724  | 0.437276  | 0.482964     | 0.04522078  |
| 17         | rs8080323  | 0.103636  | 0.0786689    | 0.04522078  |
| 1          | rs7413464  | 0.417563  | 0.37304      | 0.045246073 |
| 1          | rs3753433  | 0.360215  | 0.316928     | 0.045246073 |
| 1          | rs17509621 | 0.0913978 | 0.120954     | 0.045246073 |
| 2          | rs1992881  | 0.417563  | 0.463481     | 0.045246073 |
| 2          | rs3769439  | 0.510753  | 0.465077     | 0.045246073 |
| 3          | rs1589525  | 0.456835  | 0.502048     | 0.045246073 |
| 6          | rs10948378 | 0.268817  | 0.229642     | 0.045246073 |
| 14         | rs17669975 | 0.141577  | 0.11204      | 0.045246073 |
| 2          | rs6734894  | 0.192446  | 0.159284     | 0.04527138  |
| 13         | rs17203407 | 0.0845324 | 0.112991     | 0.04527138  |
| 13         | rs376476   | 0.331541  | 0.290317     | 0.04527138  |
| 2          | rs4233753  | 0.496416  | 0.450409     | 0.045296702 |
| 3          | rs3851993  | 0.0722022 | 0.0988372    | 0.045296702 |
| 7          | rs1931694  | 0.406475  | 0.452113     | 0.045296702 |
| 7          | rs12698330 | 0.317204  | 0.275715     | 0.045296702 |
| 14         | rs7153434  | 0.196043  | 0.161428     | 0.045296702 |
| 1          | rs6588215  | 0.474638  | 0.428912     | 0.045322039 |
| 7          | rs2965603  | 0.296763  | 0.255965     | 0.045322039 |
| 8          | rs1368635  | 0.107527  | 0.0821404    | 0.045322039 |
| 10         | rs1977486  | 0.121864  | 0.154462     | 0.045322039 |
| 15         | rs11633375 | 0.215827  | 0.18075      | 0.045322039 |
| 18         | rs8089600  | 0.331541  | 0.375255     | 0.045322039 |
| 1          | rs4927017  | 0.188172  | 0.225834     | 0.045347391 |
| 1          | rs4579776  | 0.301075  | 0.261321     | 0.045347391 |
| 2          | rs13027103 | 0.0734767 | 0.101022     | 0.045347391 |
| 2          | rs7565366  | 0.0681004 | 0.0947189    | 0.045347391 |
| 4          | rs11725706 | 0.15233   | 0.187713     | 0.045347391 |
| 4          | rs1026362  | 0.405018  | 0.360239     | 0.045347391 |
| 5          | rs27004    | 0.317204  | 0.276208     | 0.045347391 |
| 8          | rs2056669  | 0.375451  | 0.420676     | 0.045347391 |
| 9          | rs7853550  | 0.428315  | 0.383606     | 0.045347391 |
| 10         | rs10857520 | 0.415771  | 0.460988     | 0.045347391 |
| 10         | rs11244511 | 0.0917266 | 0.0686308    | 0.045347391 |
| 11         | rs11024273 | 0.342294  | 0.299966     | 0.045347391 |
| 16         | rs17807642 | 0.190647  | 0.157123     | 0.045347391 |
| 1          | rs402379   | 0.449821  | 0.494706     | 0.045372758 |
| 3          | rs11706920 | 0.107914  | 0.0827375    | 0.045372758 |
| 4          | rs3729592  | 0.215054  | 0.254859     | 0.045372758 |
| 5          | rs565928   | 0.182796  | 0.220974     | 0.045372758 |

Table DS2: All SNPs tested for association (RDC SABP vs. controls) with the Cochran-Armitage trend test and significant at the p=0.05 threshold.

| chromosome | SNP           | MAF_cases | MAF_controls | p_value     |
|------------|---------------|-----------|--------------|-------------|
| 6          | rs1458438     | 0.181004  | 0.218334     | 0.045372758 |
| 8          | rs6991605     | 0.338129  | 0.296252     | 0.045372758 |
| 9          | rs1123960     | 0.25448   | 0.296082     | 0.045372758 |
| 10         | rs7917670     | 0.168459  | 0.205111     | 0.045372758 |
| 15         | rs8034122     | 0.415771  | 0.371253     | 0.045372758 |
| 18         | rs1786811     | 0.0394265 | 0.060663     | 0.045372758 |
| 1          | rs9426458     | 0.046595  | 0.0694586    | 0.04539814  |
| 3          | rs1872397     | 0.166065  | 0.13472      | 0.04539814  |
| 5          | rs16901224    | 0.198925  | 0.164794     | 0.04539814  |
| 6          | rs756009      | 0.0593525 | 0.0846101    | 0.04539814  |
| 13         | rs640190      | 0.413978  | 0.370276     | 0.04539814  |
| 14         | rs17279319    | 0.170251  | 0.138037     | 0.04539814  |
| 14         | rs8010286     | 0.376344  | 0.332879     | 0.04539814  |
| 15         | rs4965723     | 0.078853  | 0.106814     | 0.04539814  |
| 16         | rs7194451     | 0.291367  | 0.334866     | 0.04539814  |
| 21         | rs2205084     | 0.356631  | 0.402078     | 0.04539814  |
| 6          | rs7765852     | 0.369176  | 0.413828     | 0.045423537 |
| 7          | rs441261      | 0.114695  | 0.146798     | 0.045423537 |
| 8          | rs2409808     | 0.188172  | 0.15475      | 0.045423537 |
| 12         | rs17478799    | 0.231183  | 0.271146     | 0.045423537 |
| 2          | rs4241273     | 0.440217  | 0.487048     | 0.045448949 |
| 2          | rs13024221    | 0.157706  | 0.127127     | 0.045448949 |
| 5          | rs6868282     | 0.137993  | 0.10937      | 0.045448949 |
| 7          | rs12539788    | 0.305755  | 0.265257     | 0.045448949 |
| 8          | rs1968908     | 0.425993  | 0.472194     | 0.045448949 |
| 10         | rs12768040    | 0.129032  | 0.101193     | 0.045448949 |
| 12         | rs10860832    | 0.143369  | 0.177926     | 0.045448949 |
| 16         | rs11075517    | 0.419355  | 0.374616     | 0.045448949 |
| 16         | rs4519342     | 0.321942  | 0.366099     | 0.045448949 |
| 18         | rs11152345    | 0.310036  | 0.353272     | 0.045448949 |
| 1          | rs10916679    | 0.295699  | 0.255552     | 0.045474376 |
| 1          | rs4652742     | 0.188172  | 0.225817     | 0.045474376 |
| 2          | rs11891128    | 0.164875  | 0.2015       | 0.045474376 |
| 2          | rs1517843     | 0.358423  | 0.402526     | 0.045474376 |
| 3          | rs2363714     | 0.0791367 | 0.0576005    | 0.045474376 |
| 4          | rs6847416     | 0.322581  | 0.366996     | 0.045474376 |
| 8          | rs12545742    | 0.424731  | 0.379898     | 0.045474376 |
| 9          | rs1571447     | 0.37276   | 0.417603     | 0.045474376 |
| 10         | rs10458719    | 0.410394  | 0.455722     | 0.045474376 |
| 14         | rs2922647     | 0.170251  | 0.138548     | 0.045474376 |
| 15         | SNP_A-2280818 | 0.142086  | 0.176721     | 0.045474376 |
| 1          | rs10737911    | 0.379928  | 0.425554     | 0.045499817 |
| 1          | rs11807829    | 0.363799  | 0.321063     | 0.045499817 |
| 10         | rs4751500     | 0.132616  | 0.166326     | 0.045499817 |
| 11         | rs1389551     | 0.105735  | 0.136704     | 0.045499817 |
| 11         | rs9326287     | 0.293907  | 0.253492     | 0.045499817 |
| 12         | rs11050322    | 0.295699  | 0.338325     | 0.045499817 |
| 21         | rs2155890     | 0.24552   | 0.286396     | 0.045499817 |
| 22         | rs9609889     | 0.200717  | 0.238679     | 0.045499817 |
| 2          | rs7589080     | 0.206093  | 0.245138     | 0.045525274 |
| 2          | rs2372258     | 0.266187  | 0.30802      | 0.045525274 |
| 3          | rs9873100     | 0.0967742 | 0.126664     | 0.045525274 |

Table DS2: All SNPs tested for association (RDC SABP vs. controls) with the Cochran-Armitage trend test and significant at the p=0.05 threshold.

| chromosome | SNP        | MAF_cases | MAF_controls | p_value     |
|------------|------------|-----------|--------------|-------------|
| 5          | rs13171939 | 0.38172   | 0.338045     | 0.045525274 |
| 6          | rs4470837  | 0.333333  | 0.377342     | 0.045525274 |
| 9          | rs3793499  | 0.102151  | 0.132879     | 0.045525274 |
| 12         | rs3924594  | 0.351254  | 0.395606     | 0.045525274 |
| 15         | rs2660826  | 0.0967742 | 0.126662     | 0.045525274 |
| 17         | rs4985682  | 0.440647  | 0.486685     | 0.045525274 |
| 5          | rs1220627  | 0.189964  | 0.228372     | 0.045550746 |
| 6          | rs16878358 | 0.0716846 | 0.0985003    | 0.045550746 |
| 6          | rs7759479  | 0.066787  | 0.0470508    | 0.045550746 |
| 9          | rs7867072  | 0.420863  | 0.376831     | 0.045550746 |
| 13         | rs2031838  | 0.0824373 | 0.111054     | 0.045550746 |
| 20         | rs2425460  | 0.159498  | 0.195571     | 0.045550746 |
| 1          | rs10489805 | 0.285971  | 0.246762     | 0.045576233 |
| 2          | rs11897106 | 0.353047  | 0.397751     | 0.045576233 |
| 3          | rs4447759  | 0.0629496 | 0.0882855    | 0.045576233 |
| 3          | rs4475058  | 0.0501792 | 0.0738598    | 0.045576233 |
| 3          | rs9817813  | 0.379928  | 0.425724     | 0.045576233 |
| 6          | rs12194016 | 0.519713  | 0.474455     | 0.045576233 |
| 6          | rs3812108  | 0.213262  | 0.252897     | 0.045576233 |
| 11         | rs1544872  | 0.0985663 | 0.129257     | 0.045576233 |
| 12         | rs7960825  | 0.356115  | 0.401293     | 0.045576233 |
| 15         | rs4777893  | 0.374101  | 0.331003     | 0.045576233 |
| 15         | rs8041038  | 0.125448  | 0.0979188    | 0.045601735 |
| 15         | rs9788691  | 0.141577  | 0.17615      | 0.045601735 |
| 21         | rs2830874  | 0.34767   | 0.392164     | 0.045601735 |
| 1          | rs2640912  | 0.290323  | 0.332652     | 0.045627251 |
| 3          | rs12631529 | 0.456679  | 0.501872     | 0.045627251 |
| 8          | rs2970636  | 0.370968  | 0.415843     | 0.045627251 |
| 8          | rs6421018  | 0.469314  | 0.424165     | 0.045627251 |
| 10         | rs2055552  | 0.344086  | 0.388321     | 0.045627251 |
| 11         | rs3741203  | 0.329749  | 0.288344     | 0.045627251 |
| 13         | rs4942198  | 0.302867  | 0.345826     | 0.045627251 |
| 2          | rs6758689  | 0.0663082 | 0.0924728    | 0.045652783 |
| 3          | rs2221188  | 0.489247  | 0.442969     | 0.045652783 |
| 8          | rs17718917 | 0.0701439 | 0.097099     | 0.045652783 |
| 20         | rs4814229  | 0.52509   | 0.479522     | 0.045652783 |
| 7          | rs9648374  | 0.272401  | 0.314588     | 0.04567833  |
| 21         | rs2835014  | 0.126354  | 0.159571     | 0.04567833  |
| 2          | rs11687536 | 0.352518  | 0.397239     | 0.045703892 |
| 2          | rs9789587  | 0.0770609 | 0.0560095    | 0.045703892 |
| 3          | rs1877960  | 0.258065  | 0.299864     | 0.045703892 |
| 3          | rs17235667 | 0.242806  | 0.205862     | 0.045703892 |
| 3          | rs9857292  | 0.115108  | 0.147801     | 0.045703892 |
| 3          | rs7427726  | 0.344086  | 0.30225      | 0.045703892 |
| 5          | rs10940624 | 0.12724   | 0.160136     | 0.045703892 |
| 5          | rs10037398 | 0.44964   | 0.495228     | 0.045703892 |
| 6          | rs16884919 | 0.0698925 | 0.0963896    | 0.045703892 |
| 7          | rs215720   | 0.114695  | 0.146808     | 0.045703892 |
| 10         | rs1394108  | 0.240143  | 0.280962     | 0.045703892 |
| 14         | rs1483973  | 0.530466  | 0.48552      | 0.045703892 |
| 3          | rs1368265  | 0.474729  | 0.430153     | 0.045729469 |
| 5          | rs6601036  | 0.145161  | 0.116093     | 0.045729469 |

Table DS2: All SNPs tested for association (RDC SABP vs. controls) with the Cochran-Armitage trend test and significant at the p=0.05 threshold.

| chromosome | SNP        | MAF_cases | MAF_controls | p_value     |
|------------|------------|-----------|--------------|-------------|
| 7          | rs2160321  | 0.241007  | 0.203786     | 0.045729469 |
| 7          | rs17167496 | 0.111111  | 0.0853242    | 0.045729469 |
| 8          | rs2737227  | 0.430108  | 0.385534     | 0.045729469 |
| 12         | rs6582284  | 0.351254  | 0.395571     | 0.045729469 |
| 14         | rs242400   | 0.141577  | 0.112474     | 0.045729469 |
| 17         | rs8076504  | 0.47482   | 0.42952      | 0.045729469 |
| 20         | rs259981   | 0.31362   | 0.35724      | 0.045729469 |
| 4          | rs718137   | 0.182796  | 0.149932     | 0.045755061 |
| 5          | rs10805519 | 0.437276  | 0.482976     | 0.045755061 |
| 10         | rs7076959  | 0.236559  | 0.277417     | 0.045755061 |
| 18         | rs1179809  | 0.442652  | 0.488067     | 0.045755061 |
| 20         | rs6054641  | 0.390288  | 0.346521     | 0.045755061 |
| 1          | rs309088   | 0.362007  | 0.31925      | 0.045780669 |
| 1          | rs1416236  | 0.290323  | 0.332595     | 0.045780669 |
| 4          | rs3821935  | 0.310036  | 0.269257     | 0.045780669 |
| 7          | rs7778238  | 0.541219  | 0.49523      | 0.045780669 |
| 8          | rs10110909 | 0.192446  | 0.158424     | 0.045780669 |
| 12         | rs10400419 | 0.482079  | 0.436264     | 0.045780669 |
| 4          | rs10938774 | 0.0824373 | 0.110865     | 0.045806291 |
| 6          | rs2026446  | 0.485507  | 0.440225     | 0.045806291 |
| 9          | rs10124893 | 0.344086  | 0.30208      | 0.045806291 |
| 13         | rs17065161 | 0.202509  | 0.168086     | 0.045806291 |
| 4          | rs1160068  | 0.353047  | 0.310603     | 0.045831929 |
| 5          | rs10043680 | 0.100719  | 0.13122      | 0.045831929 |
| 5          | rs919222   | 0.120072  | 0.152537     | 0.045831929 |
| 10         | rs7902917  | 0.26259   | 0.224608     | 0.045831929 |
| 16         | rs4417546  | 0.205776  | 0.245058     | 0.045831929 |
| 1          | rs4846867  | 0.107527  | 0.138207     | 0.045857581 |
| 3          | rs9850375  | 0.356115  | 0.401056     | 0.045857581 |
| 9          | rs10511919 | 0.27957   | 0.240892     | 0.045857581 |
| 12         | rs759564   | 0.281362  | 0.242078     | 0.045857581 |
| 12         | rs11066737 | 0.214029  | 0.178876     | 0.045857581 |
| 2          | rs973364   | 0.322581  | 0.36678      | 0.045883249 |
| 6          | rs4947156  | 0.289568  | 0.332707     | 0.045883249 |
| 12         | rs6539183  | 0.147482  | 0.182719     | 0.045883249 |
| 19         | rs7249283  | 0.188172  | 0.155525     | 0.045883249 |
| 20         | rs6070329  | 0.354317  | 0.31218      | 0.045883249 |
| 22         | rs885971   | 0.231183  | 0.19506      | 0.045883249 |
| 1          | rs3904943  | 0.404332  | 0.449949     | 0.045908932 |
| 2          | rs563697   | 0.216846  | 0.256895     | 0.045908932 |
| 3          | rs9829609  | 0.354839  | 0.312095     | 0.045908932 |
| 2          | rs6714320  | 0.37276   | 0.418117     | 0.04593463  |
| 6          | rs7767829  | 0.151079  | 0.186264     | 0.04593463  |
| 10         | rs12764893 | 0.0770609 | 0.10406      | 0.04593463  |
| 10         | rs10785916 | 0.501792  | 0.456559     | 0.04593463  |
| 12         | rs10843529 | 0.253597  | 0.215673     | 0.04593463  |
| 20         | rs4334548  | 0.272401  | 0.233401     | 0.04593463  |
| 8          | rs1383294  | 0.426523  | 0.472421     | 0.045960343 |
| 10         | rs1870183  | 0.0863309 | 0.115766     | 0.045960343 |
| 12         | rs11111141 | 0.143369  | 0.177793     | 0.045960343 |
| 13         | rs9546404  | 0.517921  | 0.471833     | 0.045960343 |
| 21         | rs2825413  | 0.28853   | 0.331063     | 0.045960343 |

Table DS2: All SNPs tested for association (RDC SABP vs. controls) with the Cochran-Armitage trend test and significant at the p=0.05 threshold.

| chromosome | SNP        | MAF_cases | MAF_controls | p_value     |
|------------|------------|-----------|--------------|-------------|
| 2          | rs4449134  | 0.27957   | 0.322317     | 0.045986071 |
| 3          | rs1530733  | 0.165468  | 0.134288     | 0.045986071 |
| 4          | rs1011691  | 0.311151  | 0.27045      | 0.045986071 |
| 7          | rs6958082  | 0.451613  | 0.497105     | 0.045986071 |
| 11         | rs663016   | 0.342294  | 0.38624      | 0.045986071 |
| 1          | rs860907   | 0.34767   | 0.39209      | 0.046011815 |
| 1          | rs6657693  | 0.0913978 | 0.121212     | 0.046011815 |
| 9          | rs11142564 | 0.227599  | 0.191613     | 0.046011815 |
| 11         | rs7106742  | 0.046595  | 0.0689949    | 0.046011815 |
| 11         | rs2458268  | 0.496416  | 0.451141     | 0.046011815 |
| 11         | rs11222341 | 0.290323  | 0.250341     | 0.046011815 |
| 13         | rs11148033 | 0.207885  | 0.173195     | 0.046011815 |
| 3          | rs9840469  | 0.435484  | 0.391749     | 0.046037573 |
| 5          | rs6859143  | 0.280576  | 0.322768     | 0.046037573 |
| 13         | rs1163821  | 0.146953  | 0.18219      | 0.046037573 |
| 17         | rs17662779 | 0.383513  | 0.340375     | 0.046037573 |
| 1          | rs10449290 | 0.47491   | 0.429376     | 0.046063347 |
| 2          | rs12693912 | 0.206093  | 0.245061     | 0.046063347 |
| 7          | rs2734103  | 0.311828  | 0.271054     | 0.046063347 |
| 17         | rs6505162  | 0.491007  | 0.444974     | 0.046063347 |
| 17         | rs9898576  | 0.154122  | 0.189203     | 0.046063347 |
| 1          | rs235495   | 0.124101  | 0.157411     | 0.046089136 |
| 2          | rs17751180 | 0.413669  | 0.369714     | 0.046089136 |
| 3          | rs212051   | 0.236462  | 0.277589     | 0.046089136 |
| 7          | rs10954327 | 0.167266  | 0.135758     | 0.046089136 |
| 13         | rs7326426  | 0.299283  | 0.342195     | 0.046089136 |
| 14         | rs4904708  | 0.189964  | 0.156783     | 0.046089136 |
| 1          | rs12092197 | 0.219203  | 0.1836       | 0.046114941 |
| 1          | rs2785653  | 0.32554   | 0.284715     | 0.046114941 |
| 2          | rs2591141  | 0.249104  | 0.21161      | 0.046114941 |
| 5          | rs2560495  | 0.365591  | 0.40971      | 0.046114941 |
| 6          | rs2588022  | 0.11828   | 0.150188     | 0.046114941 |
| 8          | rs7839315  | 0.480287  | 0.435456     | 0.046114941 |
| 9          | rs11141762 | 0.342294  | 0.387146     | 0.046114941 |
| 15         | rs12440178 | 0.25448   | 0.21728      | 0.046114941 |
| 18         | rs11082453 | 0.11828   | 0.0916525    | 0.046114941 |
| 1          | rs367985   | 0.505376  | 0.459257     | 0.04614076  |
| 4          | rs1487013  | 0.225806  | 0.189544     | 0.04614076  |
| 8          | rs13273325 | 0.302867  | 0.346678     | 0.04614076  |
| 8          | rs10505031 | 0.100719  | 0.131175     | 0.04614076  |
| 11         | rs297325   | 0.195341  | 0.233731     | 0.04614076  |
| 19         | rs2617815  | 0.24552   | 0.207978     | 0.04614076  |
| 1          | rs380149   | 0.365108  | 0.40937      | 0.046166595 |
| 1          | rs2008602  | 0.266187  | 0.308964     | 0.046166595 |
| 2          | rs6740249  | 0.453069  | 0.498807     | 0.046166595 |
| 5          | rs36987    | 0.370968  | 0.415843     | 0.046166595 |
| 6          | rs1224704  | 0.413669  | 0.458817     | 0.046166595 |
| 6          | rs4896632  | 0.119134  | 0.151567     | 0.046166595 |
| 13         | rs494000   | 0.21147   | 0.176651     | 0.046166595 |
| 15         | rs11632332 | 0.407942  | 0.363093     | 0.046166595 |
| 15         | rs10518689 | 0.141577  | 0.17598      | 0.046166595 |
| 16         | rs11074593 | 0.181004  | 0.218984     | 0.046166595 |

Table DS2: All SNPs tested for association (RDC SABP vs. controls) with the Cochran-Armitage trend test and significant at the p=0.05 threshold.

| chromosome | SNP        | MAF_cases | MAF_controls | p_value     |
|------------|------------|-----------|--------------|-------------|
| 4          | rs13134922 | 0.263441  | 0.225647     | 0.046192445 |
| 4          | rs6838523  | 0.310036  | 0.269244     | 0.046192445 |
| 5          | rs3777142  | 0.0519713 | 0.0752725    | 0.046192445 |
| 12         | rs1631596  | 0.109319  | 0.0841281    | 0.046192445 |
| 12         | rs2081748  | 0.0340502 | 0.053833     | 0.046192445 |
| 17         | rs2270133  | 0.521505  | 0.476336     | 0.046192445 |
| 18         | rs1868710  | 0.286738  | 0.247017     | 0.046192445 |
| 1          | rs7551939  | 0.218638  | 0.183288     | 0.04621831  |
| 2          | rs1147116  | 0.233813  | 0.197373     | 0.04621831  |
| 2          | rs6719531  | 0.105735  | 0.0809475    | 0.04621831  |
| 3          | rs2236975  | 0.102151  | 0.132604     | 0.04621831  |
| 6          | rs1550199  | 0.340502  | 0.385048     | 0.04621831  |
| 6          | rs1324536  | 0.358423  | 0.316302     | 0.04621831  |
| 7          | rs17158794 | 0.311828  | 0.355416     | 0.04621831  |
| 8          | rs4733171  | 0.541219  | 0.495744     | 0.04621831  |
| 9          | rs2840771  | 0.0860215 | 0.114227     | 0.04621831  |
| 10         | rs4497305  | 0.31362   | 0.273485     | 0.04621831  |
| 13         | rs1638703  | 0.215054  | 0.254778     | 0.04621831  |
| 16         | rs1510156  | 0.213262  | 0.178206     | 0.04621831  |
| 17         | rs2716887  | 0.421147  | 0.466951     | 0.04621831  |
| 3          | rs4688621  | 0.37276   | 0.329526     | 0.046244191 |
| 5          | rs11954764 | 0.435484  | 0.390689     | 0.046244191 |
| 6          | rs1884051  | 0.295699  | 0.3381       | 0.046244191 |
| 6          | rs1021563  | 0.109319  | 0.140497     | 0.046244191 |
| 7          | rs42511    | 0.410394  | 0.366576     | 0.046244191 |
| 8          | rs3115775  | 0.0860215 | 0.0635651    | 0.046244191 |
| 10         | rs6481814  | 0.336918  | 0.38105      | 0.046244191 |
| 12         | rs10877849 | 0.300725  | 0.344198     | 0.046244191 |
| 12         | rs4762519  | 0.173835  | 0.210589     | 0.046244191 |
| 16         | rs11075205 | 0.390681  | 0.347322     | 0.046244191 |
| 17         | rs6501468  | 0.195341  | 0.233061     | 0.046244191 |
| 1          | rs1884487  | 0.293165  | 0.335831     | 0.046270086 |
| 2          | rs2024513  | 0.428058  | 0.473765     | 0.046270086 |
| 2          | rs3828162  | 0.0974729 | 0.127645     | 0.046270086 |
| 3          | rs4687314  | 0.413978  | 0.369935     | 0.046270086 |
| 9          | rs12380216 | 0.250896  | 0.213725     | 0.046270086 |
| 13         | rs4773041  | 0.421147  | 0.466587     | 0.046270086 |
| 15         | rs16942105 | 0.0860215 | 0.0639277    | 0.046270086 |
| 17         | rs9906443  | 0.177419  | 0.145266     | 0.046270086 |
| 3          | rs2324475  | 0.32554   | 0.369068     | 0.046295998 |
| 4          | rs2712681  | 0.417563  | 0.462521     | 0.046295998 |
| 4          | rs1072776  | 0.34657   | 0.391253     | 0.046295998 |
| 9          | rs7043593  | 0.264388  | 0.226405     | 0.046295998 |
| 10         | rs4620624  | 0.302158  | 0.262423     | 0.046295998 |
| 10         | rs10996914 | 0.173835  | 0.210078     | 0.046295998 |
| 10         | rs12245528 | 0.19964   | 0.165814     | 0.046295998 |
| 20         | rs3026627  | 0.18638   | 0.153728     | 0.046295998 |
| 1          | rs1325199  | 0.430108  | 0.475485     | 0.046321924 |
| 5          | rs11742889 | 0.0698925 | 0.0498808    | 0.046321924 |
| 6          | rs1331478  | 0.28853   | 0.248808     | 0.046321924 |
| 7          | rs7791862  | 0.25448   | 0.21711      | 0.046321924 |
| 7          | rs6950238  | 0.252688  | 0.215112     | 0.046321924 |



Table DS2: All SNPs tested for association (RDC SABP vs. controls) with the Cochran-Armitage trend test and significant at the p=0.05 threshold.

| chromosome | SNP        | MAF_cases | MAF_controls | p_value     |
|------------|------------|-----------|--------------|-------------|
| 7          | rs1600739  | 0.425725  | 0.38109      | 0.046321924 |
| 13         | rs9601052  | 0.523381  | 0.477505     | 0.046321924 |
| 18         | rs921347   | 0.286738  | 0.247021     | 0.046321924 |
| 19         | rs1834984  | 0.121864  | 0.0948569    | 0.046321924 |
| 2          | rs6752294  | 0.267148  | 0.228124     | 0.046347866 |
| 3          | rs11705838 | 0.485663  | 0.439673     | 0.046347866 |
| 3          | rs17811727 | 0.207885  | 0.247105     | 0.046347866 |
| 7          | rs1208854  | 0.308244  | 0.26779      | 0.046347866 |
| 7          | rs7790256  | 0.147482  | 0.182283     | 0.046347866 |
| 8          | rs2970722  | 0.370968  | 0.415673     | 0.046347866 |
| 11         | rs11234911 | 0.100358  | 0.0758974    | 0.046347866 |
| 22         | rs16981743 | 0.046595  | 0.0692833    | 0.046347866 |
| 3          | rs1568859  | 0.198925  | 0.236698     | 0.046373823 |
| 4          | rs6536541  | 0.297491  | 0.257503     | 0.046373823 |
| 5          | rs1422601  | 0.248201  | 0.28986      | 0.046373823 |
| 6          | rs6917202  | 0.317204  | 0.360184     | 0.046373823 |
| 6          | rs989195   | 0.272401  | 0.233959     | 0.046373823 |
| 10         | rs7085596  | 0.419065  | 0.463543     | 0.046373823 |
| 11         | rs12281364 | 0.25      | 0.212751     | 0.046373823 |
| 16         | rs1862670  | 0.0878136 | 0.116144     | 0.046373823 |
| 2          | rs2083056  | 0.333935  | 0.292234     | 0.046399795 |
| 5          | rs894911   | 0.356631  | 0.313565     | 0.046399795 |
| 7          | rs2190591  | 0.37276   | 0.417801     | 0.046399795 |
| 11         | rs681200   | 0.16129   | 0.196526     | 0.046399795 |
| 16         | rs1019254  | 0.0791367 | 0.0574693    | 0.046399795 |
| 1          | rs1779823  | 0.379928  | 0.337364     | 0.046425783 |
| 2          | rs10173063 | 0.221223  | 0.185412     | 0.046425783 |
| 2          | rs12615195 | 0.258993  | 0.22118      | 0.046425783 |
| 3          | rs2223084  | 0.184588  | 0.222374     | 0.046425783 |
| 3          | rs2378242  | 0.0681004 | 0.0484642    | 0.046425783 |
| 7          | rs2991238  | 0.397482  | 0.443252     | 0.046425783 |
| 12         | rs11050523 | 0.253597  | 0.21582      | 0.046425783 |
| 20         | rs2295180  | 0.0860215 | 0.114388     | 0.046425783 |
| 4          | rs17050206 | 0.0431655 | 0.0654174    | 0.046451786 |
| 14         | rs2238202  | 0.133094  | 0.166894     | 0.046451786 |
| 17         | rs4924892  | 0.102151  | 0.133186     | 0.046451786 |
| 19         | rs11671591 | 0.173835  | 0.210922     | 0.046451786 |
| 6          | rs12191625 | 0.170251  | 0.206644     | 0.046477804 |
| 12         | rs11054074 | 0.469314  | 0.424506     | 0.046477804 |
| 13         | rs1570900  | 0.179211  | 0.216604     | 0.046477804 |
| 20         | rs913825   | 0.397849  | 0.443042     | 0.046477804 |
| 1          | rs12739747 | 0.168459  | 0.136921     | 0.046503838 |
| 5          | rs875348   | 0.501792  | 0.456899     | 0.046503838 |
| 6          | rs6569548  | 0.376344  | 0.333504     | 0.046503838 |
| 7          | rs1912445  | 0.249104  | 0.211971     | 0.046503838 |
| 7          | rs12705678 | 0.246403  | 0.209044     | 0.046503838 |
| 8          | rs11780396 | 0.166667  | 0.202763     | 0.046503838 |
| 8          | rs6986760  | 0.40681   | 0.452332     | 0.046503838 |
| 13         | rs1885894  | 0.275986  | 0.236689     | 0.046503838 |
| 2          | rs2043746  | 0.0376344 | 0.0585632    | 0.046529887 |
| 2          | rs2113385  | 0.293907  | 0.336342     | 0.046529887 |
| 3          | rs13068076 | 0.137993  | 0.17212      | 0.046529887 |

Table DS2: All SNPs tested for association (RDC SABP vs. controls) with the Cochran-Armitage trend test and significant at the p=0.05 threshold.

| chromosome | SNP           | MAF_cases | MAF_controls | p_value     |
|------------|---------------|-----------|--------------|-------------|
| 13         | rs1536207     | 0.327957  | 0.371721     | 0.046529887 |
| 21         | rs2830586     | 0.198925  | 0.164964     | 0.046529887 |
| 1          | rs484335      | 0.394265  | 0.438564     | 0.046555951 |
| 4          | rs1394279     | 0.115942  | 0.14811      | 0.046555951 |
| 7          | rs2058389     | 0.0701439 | 0.0968676    | 0.046555951 |
| 8          | rs17708659    | 0.046595  | 0.0690655    | 0.046555951 |
| 21         | rs162377      | 0.356115  | 0.313458     | 0.046555951 |
| 1          | rs10797754    | 0.358423  | 0.403105     | 0.046582031 |
| 2          | rs16830418    | 0.0860215 | 0.0636487    | 0.046582031 |
| 6          | rs1753251     | 0.103943  | 0.0788127    | 0.046582031 |
| 8          | rs9298320     | 0.159498  | 0.195504     | 0.046582031 |
| 8          | rs2289888     | 0.40681   | 0.452284     | 0.046582031 |
| 13         | rs7321465     | 0.370968  | 0.415303     | 0.046582031 |
| 4          | rs10004231    | 0.161871  | 0.130709     | 0.046608126 |
| 5          | rs835087      | 0.11828   | 0.150495     | 0.046608126 |
| 7          | rs4391312     | 0.116906  | 0.149132     | 0.046608126 |
| 9          | rs10976690    | 0.448029  | 0.40407      | 0.046608126 |
| 10         | rs2807753     | 0.227599  | 0.191914     | 0.046608126 |
| 11         | rs1263055     | 0.514388  | 0.468495     | 0.046608126 |
| 20         | rs5019244     | 0.532258  | 0.486694     | 0.046608126 |
| 4          | SNP_A-1978087 | 0.0467626 | 0.0696763    | 0.046634237 |
| 6          | rs4959711     | 0.175627  | 0.143076     | 0.046634237 |
| 7          | rs6960104     | 0.100358  | 0.130065     | 0.046634237 |
| 8          | rs4073503     | 0.224014  | 0.18846      | 0.046634237 |
| 8          | rs11783663    | 0.47482   | 0.429642     | 0.046634237 |
| 9          | rs10815985    | 0.15233   | 0.1224       | 0.046634237 |
| 11         | rs7110868     | 0.139785  | 0.110675     | 0.046634237 |
| 20         | rs6142868     | 0.290323  | 0.250596     | 0.046634237 |
| 21         | rs2827992     | 0.295699  | 0.338446     | 0.046634237 |
| 1          | rs10494309    | 0.125448  | 0.158146     | 0.046660363 |
| 2          | rs7583759     | 0.334532  | 0.378365     | 0.046660363 |
| 2          | rs1345947     | 0.206093  | 0.244891     | 0.046660363 |
| 4          | rs212282      | 0.318345  | 0.278043     | 0.046660363 |
| 4          | rs7661720     | 0.363799  | 0.321587     | 0.046660363 |
| 9          | rs16914012    | 0.0395683 | 0.0605802    | 0.046660363 |
| 13         | rs9509136     | 0.519713  | 0.473613     | 0.046660363 |
| 13         | rs17077014    | 0.0752688 | 0.10266      | 0.046660363 |
| 16         | rs9932192     | 0.102151  | 0.132663     | 0.046660363 |
| 16         | rs2550694     | 0.143369  | 0.113969     | 0.046660363 |
| 20         | rs2268924     | 0.359712  | 0.317485     | 0.046660363 |
| 2          | rs953369      | 0.199275  | 0.238144     | 0.046686505 |
| 5          | rs1501720     | 0.392473  | 0.349488     | 0.046686505 |
| 5          | rs10050689    | 0.473118  | 0.427403     | 0.046686505 |
| 8          | rs17079488    | 0.0539568 | 0.077827     | 0.046686505 |
| 13         | rs7489480     | 0.201439  | 0.240545     | 0.046686505 |
| 16         | SNP_A-2162733 | 0.399642  | 0.444653     | 0.046686505 |
| 5          | rs245493      | 0.166667  | 0.135605     | 0.046712662 |
| 7          | rs3778851     | 0.132616  | 0.10477      | 0.046712662 |
| 9          | rs10738655    | 0.315412  | 0.275034     | 0.046712662 |
| 9          | rs6559460     | 0.345878  | 0.389986     | 0.046712662 |
| 9          | rs10989064    | 0.34767   | 0.305764     | 0.046712662 |
| 12         | rs11174754    | 0.16129   | 0.13062      | 0.046712662 |

Table DS2: All SNPs tested for association (RDC SABP vs. controls) with the Cochran-Armitage trend test and significant at the p=0.05 threshold.

| chromosome | SNP        | MAF_cases | MAF_controls | p_value     |
|------------|------------|-----------|--------------|-------------|
| 13         | rs17530810 | 0.236559  | 0.199932     | 0.046712662 |
| 14         | rs7149409  | 0.248188  | 0.210679     | 0.046712662 |
| 16         | rs899310   | 0.286738  | 0.246764     | 0.046712662 |
| 19         | rs3745469  | 0.0683453 | 0.0944331    | 0.046712662 |
| 21         | rs2242888  | 0.498208  | 0.453168     | 0.046712662 |
| 5          | rs10068386 | 0.0896057 | 0.0668148    | 0.046738834 |
| 7          | rs17167808 | 0.369176  | 0.326176     | 0.046738834 |
| 8          | rs1916188  | 0.296763  | 0.257436     | 0.046738834 |
| 8          | rs7007302  | 0.40681   | 0.4523       | 0.046738834 |
| 10         | rs7099978  | 0.175627  | 0.143782     | 0.046738834 |
| 12         | rs1512979  | 0.0824373 | 0.110487     | 0.046738834 |
| 19         | rs17501293 | 0.195341  | 0.161955     | 0.046738834 |
| 2          | rs1432219  | 0.318841  | 0.363109     | 0.046765022 |
| 3          | rs10510809 | 0.0863309 | 0.11545      | 0.046765022 |
| 6          | rs2446484  | 0.402878  | 0.358629     | 0.046765022 |
| 8          | rs352203   | 0.390681  | 0.435308     | 0.046765022 |
| 11         | rs11225649 | 0.0842294 | 0.112189     | 0.046765022 |
| 12         | rs10777156 | 0.27518   | 0.236149     | 0.046765022 |
| 16         | rs16969049 | 0.09319   | 0.069942     | 0.046765022 |
| 17         | rs2367252  | 0.333333  | 0.291993     | 0.046765022 |
| 20         | rs6123870  | 0.268817  | 0.310392     | 0.046765022 |
| 5          | rs200077   | 0.202509  | 0.16871      | 0.046791225 |
| 7          | rs13225414 | 0.351254  | 0.309305     | 0.046791225 |
| 9          | rs10815619 | 0.129032  | 0.162921     | 0.046791225 |
| 13         | rs9594703  | 0.189964  | 0.156548     | 0.046791225 |
| 20         | rs10460622 | 0.202509  | 0.168087     | 0.046791225 |
| 1          | rs5085     | 0.209677  | 0.174728     | 0.046817444 |
| 2          | rs4670302  | 0.133574  | 0.105451     | 0.046817444 |
| 3          | rs17231503 | 0.283154  | 0.24463      | 0.046817444 |
| 5          | rs6863288  | 0.231183  | 0.271302     | 0.046817444 |
| 5          | rs2560606  | 0.424731  | 0.469877     | 0.046817444 |
| 6          | rs9359845  | 0.471326  | 0.426596     | 0.046817444 |
| 11         | rs10830715 | 0.106115  | 0.0811733    | 0.046817444 |
| 13         | rs7324250  | 0.227599  | 0.267699     | 0.046817444 |
| 17         | rs1607974  | 0.428058  | 0.382794     | 0.046817444 |
| 18         | rs17817180 | 0.224014  | 0.188483     | 0.046817444 |
| 21         | rs2837504  | 0.345878  | 0.390252     | 0.046817444 |
| 4          | rs1914237  | 0.333333  | 0.377554     | 0.046843678 |
| 12         | rs2650128  | 0.0913978 | 0.121419     | 0.046843678 |
| 12         | rs996877   | 0.182796  | 0.220198     | 0.046843678 |
| 13         | rs9509266  | 0.178182  | 0.21577      | 0.046843678 |
| 13         | rs9595602  | 0.206093  | 0.171662     | 0.046843678 |
| 14         | rs1189138  | 0.437276  | 0.392407     | 0.046843678 |
| 15         | rs1693506  | 0.145161  | 0.179775     | 0.046843678 |
| 18         | rs2846808  | 0.172662  | 0.140807     | 0.046843678 |
| 2          | rs2564024  | 0.456835  | 0.411725     | 0.046869928 |
| 15         | rs1947219  | 0.215054  | 0.179837     | 0.046869928 |
| 18         | rs12960349 | 0.379496  | 0.336342     | 0.046869928 |
| 10         | rs7920031  | 0.263441  | 0.2254       | 0.046896194 |
| 16         | rs2346943  | 0.403226  | 0.448229     | 0.046896194 |
| 1          | rs10753558 | 0.308244  | 0.351776     | 0.046922474 |
| 1          | rs10789239 | 0.31362   | 0.273068     | 0.046922474 |

Table DS2: All SNPs tested for association (RDC SABP vs. controls) with the Cochran-Armitage trend test and significant at the p=0.05 threshold.

| chromosome | SNP           | MAF_cases | MAF_controls | p_value     |
|------------|---------------|-----------|--------------|-------------|
| 1          | rs7516477     | 0.379928  | 0.336908     | 0.046922474 |
| 1          | rs4278334     | 0.179211  | 0.215843     | 0.046922474 |
| 5          | rs11739995    | 0.112903  | 0.0868529    | 0.046922474 |
| 10         | rs368110      | 0.444444  | 0.489949     | 0.046922474 |
| 16         | rs7203059     | 0.123656  | 0.0962193    | 0.046922474 |
| 22         | rs5998541     | 0.304659  | 0.264566     | 0.046922474 |
| 12         | rs10845473    | 0.241935  | 0.282016     | 0.046948771 |
| 16         | rs11640872    | 0.207885  | 0.173306     | 0.046948771 |
| 4          | rs11942645    | 0.478495  | 0.43356      | 0.046975083 |
| 6          | rs6938902     | 0.194245  | 0.232131     | 0.046975083 |
| 13         | rs9525895     | 0.159498  | 0.1954       | 0.046975083 |
| 15         | rs17685163    | 0.413978  | 0.460068     | 0.046975083 |
| 16         | rs1909338     | 0.338129  | 0.296252     | 0.046975083 |
| 8          | rs11136516    | 0.421147  | 0.466417     | 0.04700141  |
| 8          | rs13255114    | 0.413978  | 0.459686     | 0.04700141  |
| 12         | rs11179746    | 0.318996  | 0.361793     | 0.04700141  |
| 13         | rs9301639     | 0.129032  | 0.162296     | 0.04700141  |
| 13         | rs9583610     | 0.359712  | 0.404128     | 0.04700141  |
| 15         | rs6495052     | 0.397482  | 0.354685     | 0.04700141  |
| 21         | rs3737408     | 0.17446   | 0.21085      | 0.04700141  |
| 10         | rs1560804     | 0.419065  | 0.463386     | 0.047027753 |
| 12         | rs17183465    | 0.21223   | 0.177282     | 0.047027753 |
| 16         | rs7185153     | 0.435484  | 0.480409     | 0.047027753 |
| 21         | rs2064052     | 0.166667  | 0.20297      | 0.047027753 |
| 3          | rs4686212     | 0.255396  | 0.29605      | 0.047054112 |
| 10         | rs902474      | 0.390288  | 0.435308     | 0.047054112 |
| 12         | rs2192902     | 0.439068  | 0.395095     | 0.047054112 |
| 13         | rs1571628     | 0.177419  | 0.145145     | 0.047054112 |
| 16         | rs226055      | 0.290323  | 0.251022     | 0.047054112 |
| 16         | rs8182199     | 0.0430108 | 0.0645876    | 0.047054112 |
| 1          | rs2665496     | 0.107914  | 0.0828221    | 0.047080486 |
| 3          | rs334543      | 0.353047  | 0.311009     | 0.047080486 |
| 4          | rs10488943    | 0.102151  | 0.0778157    | 0.047080486 |
| 4          | rs1911876     | 0.326165  | 0.369884     | 0.047080486 |
| 10         | rs11252842    | 0.102518  | 0.078157     | 0.047080486 |
| 14         | rs1868629     | 0.342294  | 0.385744     | 0.047080486 |
| 15         | rs17487811    | 0.326165  | 0.369676     | 0.047080486 |
| 15         | rs1869128     | 0.142086  | 0.176501     | 0.047080486 |
| 18         | rs17656948    | 0.437276  | 0.392504     | 0.047080486 |
| 2          | rs3890826     | 0.415468  | 0.45998      | 0.047106876 |
| 3          | rs7624884     | 0.0860215 | 0.114913     | 0.047106876 |
| 4          | SNP_A-2307245 | 0.333333  | 0.291624     | 0.047106876 |
| 5          | rs262027      | 0.440433  | 0.486206     | 0.047106876 |
| 10         | rs12764177    | 0.232975  | 0.196763     | 0.047106876 |
| 11         | rs11218131    | 0.0716846 | 0.098397     | 0.047106876 |
| 18         | rs11876033    | 0.324373  | 0.367928     | 0.047106876 |
| 1          | rs4509569     | 0.310036  | 0.269349     | 0.047133281 |
| 2          | rs3748895     | 0.397849  | 0.354223     | 0.047133281 |
| 3          | rs6796248     | 0.184588  | 0.221825     | 0.047133281 |
| 6          | rs1753505     | 0.256272  | 0.218686     | 0.047133281 |
| 7          | rs10238376    | 0.137993  | 0.172173     | 0.047133281 |
| 8          | rs17602393    | 0.424731  | 0.470358     | 0.047133281 |

Table DS2: All SNPs tested for association (RDC SABP vs. controls) with the Cochran-Armitage trend test and significant at the p=0.05 threshold.

| chromosome | SNP           | MAF_cases | MAF_controls | p_value     |
|------------|---------------|-----------|--------------|-------------|
| 11         | rs573245      | 0.163082  | 0.132243     | 0.047133281 |
| 12         | rs11060669    | 0.145161  | 0.179618     | 0.047133281 |
| 3          | rs510348      | 0.192446  | 0.230153     | 0.047159702 |
| 8          | rs7825931     | 0.541219  | 0.495911     | 0.047159702 |
| 8          | rs4147346     | 0.392473  | 0.437628     | 0.047159702 |
| 9          | rs554710      | 0.335125  | 0.293345     | 0.047159702 |
| 11         | rs6484487     | 0.415771  | 0.459823     | 0.047159702 |
| 17         | rs8080623     | 0.0431655 | 0.0648686    | 0.047159702 |
| 19         | rs472835      | 0.24552   | 0.208149     | 0.047159702 |
| 20         | rs4815603     | 0.353047  | 0.396628     | 0.047159702 |
| 1          | rs4927240     | 0.401434  | 0.446508     | 0.047186139 |
| 1          | rs4926338     | 0.331541  | 0.290191     | 0.047186139 |
| 1          | rs11122415    | 0.0611511 | 0.0864534    | 0.047186139 |
| 2          | rs12691594    | 0.285971  | 0.328056     | 0.047186139 |
| 5          | rs200056      | 0.202509  | 0.168767     | 0.047186139 |
| 5          | rs6888357     | 0.223022  | 0.262351     | 0.047186139 |
| 8          | rs958374      | 0.451613  | 0.496934     | 0.047186139 |
| 12         | rs804445      | 0.270609  | 0.312372     | 0.047186139 |
| 13         | rs654927      | 0.413978  | 0.370616     | 0.047186139 |
| 15         | rs7163502     | 0.301075  | 0.344751     | 0.047186139 |
| 21         | rs1537118     | 0.134409  | 0.168089     | 0.047186139 |
| 4          | rs6448507     | 0.18705   | 0.22523      | 0.047212591 |
| 4          | rs1562095     | 0.215054  | 0.179959     | 0.047212591 |
| 4          | rs1870567     | 0.409747  | 0.454731     | 0.047212591 |
| 7          | SNP_A-4249222 | 0.120504  | 0.0937607    | 0.047212591 |
| 11         | rs603446      | 0.498208  | 0.453338     | 0.047212591 |
| 12         | rs12820694    | 0.326165  | 0.285009     | 0.047212591 |
| 2          | rs13430962    | 0.0949821 | 0.124617     | 0.047239059 |
| 5          | rs12374538    | 0.369176  | 0.326805     | 0.047239059 |
| 6          | rs4959446     | 0.429856  | 0.385349     | 0.047239059 |
| 7          | rs2665452     | 0.249104  | 0.212168     | 0.047239059 |
| 8          | rs10108191    | 0.310036  | 0.353102     | 0.047239059 |
| 13         | rs4427681     | 0.184116  | 0.221806     | 0.047239059 |
| 1          | rs3917729     | 0.0967742 | 0.127087     | 0.047265542 |
| 1          | rs1700853     | 0.193141  | 0.15985      | 0.047265542 |
| 3          | rs1545997     | 0.243728  | 0.206814     | 0.047265542 |
| 3          | rs7433760     | 0.332734  | 0.291723     | 0.047265542 |
| 4          | rs7699230     | 0.336331  | 0.295385     | 0.047265542 |
| 13         | rs338732      | 0.259857  | 0.301466     | 0.047265542 |
| 2          | rs17368670    | 0.227599  | 0.191928     | 0.047292042 |
| 2          | rs6740108     | 0.388087  | 0.43347      | 0.047292042 |
| 4          | rs2256069     | 0.521505  | 0.476669     | 0.047292042 |
| 6          | rs9345216     | 0.253597  | 0.294518     | 0.047292042 |
| 9          | rs7035800     | 0.272401  | 0.314544     | 0.047292042 |
| 11         | rs12290811    | 0.181004  | 0.148552     | 0.047292042 |
| 13         | rs4772188     | 0.281362  | 0.322977     | 0.047292042 |
| 16         | rs8053797     | 0.455197  | 0.410964     | 0.047292042 |
| 19         | rs17304618    | 0.34767   | 0.305584     | 0.047292042 |
| 2          | rs798418      | 0.11828   | 0.0916525    | 0.047318556 |
| 2          | rs2696970     | 0.456989  | 0.501872     | 0.047318556 |
| 7          | rs17170755    | 0.133094  | 0.105281     | 0.047318556 |
| 8          | rs10096438    | 0.0842294 | 0.1127       | 0.047318556 |

Table DS2: All SNPs tested for association (RDC SABP vs. controls) with the Cochran-Armitage trend test and significant at the p=0.05 threshold.

| chromosome | SNP        | MAF_cases | MAF_controls | p_value     |
|------------|------------|-----------|--------------|-------------|
| 10         | rs1936860  | 0.130824  | 0.164281     | 0.047318556 |
| 13         | rs1163829  | 0.360215  | 0.404469     | 0.047318556 |
| 14         | rs214004   | 0.377698  | 0.422147     | 0.047318556 |
| 19         | rs7249636  | 0.320789  | 0.279727     | 0.047318556 |
| 20         | rs11698834 | 0.206835  | 0.172795     | 0.047318556 |
| 4          | rs6818870  | 0.172043  | 0.208716     | 0.047345087 |
| 7          | rs4732416  | 0.388889  | 0.345721     | 0.047345087 |
| 10         | rs7900287  | 0.129496  | 0.162962     | 0.047345087 |
| 12         | rs10747814 | 0.354839  | 0.398943     | 0.047345087 |
| 15         | rs17271591 | 0.195341  | 0.233629     | 0.047345087 |
| 1          | rs3026913  | 0.102518  | 0.133231     | 0.047371633 |
| 2          | rs764766   | 0.0860215 | 0.11469      | 0.047371633 |
| 4          | rs7680120  | 0.467742  | 0.422684     | 0.047371633 |
| 6          | rs9364814  | 0.428058  | 0.384379     | 0.047371633 |
| 11         | rs4442520  | 0.150538  | 0.120778     | 0.047371633 |
| 12         | rs10506374 | 0.343525  | 0.387943     | 0.047371633 |
| 15         | rs2460641  | 0.334532  | 0.293327     | 0.047371633 |
| 15         | rs16964348 | 0.0752688 | 0.0547035    | 0.047371633 |
| 15         | rs4278695  | 0.0881295 | 0.117076     | 0.047371633 |
| 3          | rs17050220 | 0.170251  | 0.138889     | 0.047398195 |
| 6          | rs1925453  | 0.530466  | 0.485019     | 0.047398195 |
| 7          | rs1106683  | 0.166667  | 0.135417     | 0.047398195 |
| 12         | rs10507063 | 0.115108  | 0.0889571    | 0.047398195 |
| 13         | rs4907525  | 0.399642  | 0.356608     | 0.047398195 |
| 14         | rs2119760  | 0.0935252 | 0.123127     | 0.047398195 |
| 16         | rs2011228  | 0.507194  | 0.462206     | 0.047398195 |
| 1          | rs1419090  | 0.116487  | 0.0901193    | 0.047424773 |
| 3          | rs6797728  | 0.0573477 | 0.0821124    | 0.047424773 |
| 5          | rs1860230  | 0.0701439 | 0.0965928    | 0.047424773 |
| 6          | rs910552   | 0.270609  | 0.312479     | 0.047424773 |
| 9          | rs10116271 | 0.539568  | 0.494037     | 0.047424773 |
| 17         | rs9905095  | 0.228417  | 0.192138     | 0.047424773 |
| 18         | rs2580133  | 0.243728  | 0.206574     | 0.047424773 |
| 2          | rs10490210 | 0.173835  | 0.142371     | 0.047451366 |
| 2          | rs7599774  | 0.267025  | 0.228294     | 0.047451366 |
| 4          | rs10010766 | 0.321942  | 0.365679     | 0.047451366 |
| 22         | rs2298432  | 0.417266  | 0.374063     | 0.047451366 |
| 1          | rs17534243 | 0.280576  | 0.241485     | 0.047477975 |
| 1          | rs10493412 | 0.121864  | 0.154292     | 0.047477975 |
| 2          | rs10176647 | 0.0413669 | 0.0627344    | 0.047477975 |
| 2          | rs10933165 | 0.38172   | 0.426746     | 0.047477975 |
| 2          | rs1946949  | 0.290323  | 0.333163     | 0.047477975 |
| 4          | rs7693338  | 0.320144  | 0.278649     | 0.047477975 |
| 4          | rs1915776  | 0.155914  | 0.125511     | 0.047477975 |
| 4          | rs11132476 | 0.508961  | 0.463664     | 0.047477975 |
| 6          | rs6899518  | 0.376344  | 0.333731     | 0.047477975 |
| 9          | rs324458   | 0.318996  | 0.362645     | 0.047477975 |
| 10         | rs7087155  | 0.044964  | 0.0673142    | 0.047477975 |
| 10         | rs7072753  | 0.421147  | 0.465358     | 0.047477975 |
| 11         | rs663555   | 0.342294  | 0.385899     | 0.047477975 |
| 11         | rs2676165  | 0.541219  | 0.496083     | 0.047477975 |
| 13         | rs1335873  | 0.267986  | 0.229642     | 0.047477975 |

Table DS2: All SNPs tested for association (RDC SABP vs. controls) with the Cochran-Armitage trend test and significant at the p=0.05 threshold.

| chromosome | SNP           | MAF_cases | MAF_controls | p_value     |
|------------|---------------|-----------|--------------|-------------|
| 13         | rs9576222     | 0.258065  | 0.219782     | 0.047477975 |
| 1          | rs6664830     | 0.137993  | 0.109125     | 0.0475046   |
| 2          | rs1869987     | 0.0358423 | 0.0561989    | 0.0475046   |
| 4          | rs2060028     | 0.263538  | 0.225307     | 0.0475046   |
| 9          | rs11142573    | 0.227599  | 0.191888     | 0.0475046   |
| 12         | rs2141764     | 0.332734  | 0.377387     | 0.0475046   |
| 21         | rs2834784     | 0.0467626 | 0.0693829    | 0.0475046   |
| 6          | rs12524361    | 0.28853   | 0.249064     | 0.04753124  |
| 12         | rs4768814     | 0.326165  | 0.284618     | 0.04753124  |
| 17         | rs389774      | 0.184588  | 0.222071     | 0.04753124  |
| 2          | rs995406      | 0.19964   | 0.238038     | 0.047557897 |
| 2          | rs6736628     | 0.173835  | 0.141738     | 0.047557897 |
| 3          | rs1863392     | 0.21147   | 0.176892     | 0.047557897 |
| 8          | rs1460167     | 0.284946  | 0.245997     | 0.047557897 |
| 10         | rs16934688    | 0.0412186 | 0.062649     | 0.047557897 |
| 13         | rs9604214     | 0.322581  | 0.366905     | 0.047557897 |
| 15         | rs921783      | 0.12724   | 0.160532     | 0.047557897 |
| 1          | rs1767141     | 0.114695  | 0.0888662    | 0.047584569 |
| 3          | rs939298      | 0.423913  | 0.379727     | 0.047584569 |
| 4          | rs13116423    | 0.327957  | 0.37138      | 0.047584569 |
| 6          | rs11153778    | 0.19964   | 0.165644     | 0.047584569 |
| 8          | rs6982602     | 0.426523  | 0.47208      | 0.047584569 |
| 12         | rs10735990    | 0.129032  | 0.101874     | 0.047584569 |
| 14         | rs7155973     | 0.0483871 | 0.0711361    | 0.047584569 |
| 15         | rs11070592    | 0.362007  | 0.406783     | 0.047584569 |
| 22         | rs4820854     | 0.458781  | 0.414052     | 0.047584569 |
| 1          | rs1036001     | 0.32554   | 0.36955      | 0.047611257 |
| 3          | rs1602626     | 0.0501792 | 0.0731832    | 0.047611257 |
| 7          | rs2080161     | 0.188172  | 0.226065     | 0.047611257 |
| 7          | rs336286      | 0.169065  | 0.137666     | 0.047611257 |
| 8          | rs10110892    | 0.401079  | 0.358117     | 0.047611257 |
| 9          | rs3122938     | 0.320789  | 0.364441     | 0.047611257 |
| 12         | rs10877173    | 0.057554  | 0.0819672    | 0.047611257 |
| 18         | rs11663460    | 0.217626  | 0.256305     | 0.047611257 |
| 1          | rs12071085    | 0.227599  | 0.267109     | 0.04763796  |
| 1          | rs2841409     | 0.431655  | 0.476994     | 0.04763796  |
| 2          | rs6715621     | 0.28853   | 0.249061     | 0.04763796  |
| 5          | rs200050      | 0.202509  | 0.168827     | 0.04763796  |
| 5          | rs2028258     | 0.0971223 | 0.126876     | 0.04763796  |
| 5          | rs3815738     | 0.0519713 | 0.0751022    | 0.04763796  |
| 14         | rs7158852     | 0.265233  | 0.30705      | 0.04763796  |
| 16         | rs8059437     | 0.487455  | 0.441698     | 0.04763796  |
| 20         | rs6026132     | 0.363799  | 0.321806     | 0.04763796  |
| 1          | rs12074413    | 0.111511  | 0.143222     | 0.04766468  |
| 3          | rs2049777     | 0.27957   | 0.321915     | 0.04766468  |
| 3          | rs7644425     | 0.159498  | 0.194852     | 0.04766468  |
| 4          | rs13103034    | 0.198925  | 0.165134     | 0.04766468  |
| 4          | rs17620822    | 0.166667  | 0.203066     | 0.04766468  |
| 4          | rs11132964    | 0.478495  | 0.433708     | 0.04766468  |
| 6          | rs4710013     | 0.0681004 | 0.0939311    | 0.04766468  |
| 7          | SNP_A-1916727 | 0.0663082 | 0.0919932    | 0.04766468  |
| 9          | rs9299055     | 0.293907  | 0.336401     | 0.04766468  |

Table DS2: All SNPs tested for association (RDC SABP vs. controls) with the Cochran-Armitage trend test and significant at the p=0.05 threshold.

| chromosome | SNP        | MAF_cases | MAF_controls | p_value     |
|------------|------------|-----------|--------------|-------------|
| 9          | rs1322060  | 0.439068  | 0.395365     | 0.04766468  |
| 13         | rs4885690  | 0.257194  | 0.219687     | 0.04766468  |
| 14         | rs221899   | 0.363799  | 0.321076     | 0.04766468  |
| 20         | rs2076689  | 0.0860215 | 0.11431      | 0.04766468  |
| 2          | rs10495505 | 0.229391  | 0.269676     | 0.047691415 |
| 2          | rs1518990  | 0.271739  | 0.313799     | 0.047691415 |
| 6          | rs791058   | 0.0734767 | 0.0530174    | 0.047691415 |
| 7          | rs1182151  | 0.324373  | 0.283839     | 0.047691415 |
| 7          | rs10272371 | 0.123656  | 0.0966973    | 0.047691415 |
| 13         | rs2994865  | 0.179211  | 0.215356     | 0.047691415 |
| 13         | rs12871015 | 0.453405  | 0.498297     | 0.047691415 |
| 15         | rs6496602  | 0.297491  | 0.339973     | 0.047691415 |
| 17         | rs7216112  | 0.295699  | 0.338666     | 0.047691415 |
| 21         | rs8132118  | 0.272401  | 0.313969     | 0.047691415 |
| 1          | rs1936062  | 0.125448  | 0.0982964    | 0.047718166 |
| 1          | rs2292276  | 0.339928  | 0.384078     | 0.047718166 |
| 3          | rs6771954  | 0.232975  | 0.197104     | 0.047718166 |
| 5          | rs2915436  | 0.200717  | 0.166667     | 0.047718166 |
| 5          | rs17052039 | 0.222222  | 0.2621       | 0.047718166 |
| 7          | rs12537587 | 0.144404  | 0.178937     | 0.047718166 |
| 11         | rs2176921  | 0.150538  | 0.120825     | 0.047718166 |
| 17         | rs225184   | 0.191756  | 0.229564     | 0.047718166 |
| 3          | rs6786360  | 0.453405  | 0.408796     | 0.047744933 |
| 6          | rs9451150  | 0.318996  | 0.278345     | 0.047744933 |
| 8          | rs870686   | 0.0716846 | 0.0513652    | 0.047744933 |
| 10         | rs10882974 | 0.263441  | 0.225537     | 0.047744933 |
| 11         | rs12797672 | 0.528777  | 0.483948     | 0.047744933 |
| 12         | rs3782788  | 0.357401  | 0.315556     | 0.047744933 |
| 12         | rs10860130 | 0.453405  | 0.498808     | 0.047744933 |
| 13         | rs4773442  | 0.516129  | 0.470879     | 0.047744933 |
| 17         | rs7218932  | 0.19964   | 0.238323     | 0.047744933 |
| 18         | rs1573316  | 0.110108  | 0.084925     | 0.047744933 |
| 2          | rs7578514  | 0.491039  | 0.446075     | 0.047771716 |
| 3          | rs2885872  | 0.078853  | 0.0575809    | 0.047771716 |
| 5          | rs2174440  | 0.145683  | 0.180314     | 0.047771716 |
| 5          | rs17780213 | 0.0863309 | 0.11507      | 0.047771716 |
| 6          | rs2505674  | 0.458781  | 0.503063     | 0.047771716 |
| 8          | rs11782735 | 0.107527  | 0.138407     | 0.047771716 |
| 9          | rs10867977 | 0.435484  | 0.391253     | 0.047771716 |
| 10         | rs7899892  | 0.164875  | 0.200239     | 0.047771716 |
| 10         | rs7093784  | 0.057554  | 0.0820565    | 0.047771716 |
| 10         | rs10999960 | 0.291367  | 0.333788     | 0.047771716 |
| 14         | rs2286412  | 0.473022  | 0.428205     | 0.047771716 |
| 17         | rs962885   | 0.360215  | 0.318166     | 0.047771716 |
| 20         | rs6128441  | 0.420863  | 0.46577      | 0.047771716 |
| 3          | rs9840980  | 0.532609  | 0.487179     | 0.047798515 |
| 5          | rs10056426 | 0.0609319 | 0.0858069    | 0.047798515 |
| 8          | rs11785277 | 0.107527  | 0.138359     | 0.047798515 |
| 9          | rs10511627 | 0.295699  | 0.256222     | 0.047798515 |
| 10         | rs11254434 | 0.18705   | 0.154254     | 0.047798515 |
| 3          | rs7639102  | 0.0842294 | 0.11259      | 0.047825329 |
| 1          | rs1980549  | 0.132616  | 0.165986     | 0.047852159 |



Table DS2: All SNPs tested for association (RDC SABP vs. controls) with the Cochran-Armitage trend test and significant at the p=0.05 threshold.

| chromosome | SNP        | MAF_cases | MAF_controls | p_value     |
|------------|------------|-----------|--------------|-------------|
| 2          | rs10172635 | 0.204301  | 0.170698     | 0.047852159 |
| 2          | rs11686654 | 0.188172  | 0.22523      | 0.047852159 |
| 3          | rs2046327  | 0.121864  | 0.0948569    | 0.047852159 |
| 4          | rs1979903  | 0.0503597 | 0.0739605    | 0.047852159 |
| 7          | rs7788251  | 0.281362  | 0.242342     | 0.047852159 |
| 9          | rs16910774 | 0.0878136 | 0.116275     | 0.047852159 |
| 10         | rs10763763 | 0.0591398 | 0.0841281    | 0.047852159 |
| 12         | rs7305694  | 0.333333  | 0.29252      | 0.047852159 |
| 12         | rs11049732 | 0.530466  | 0.485349     | 0.047852159 |
| 12         | rs7980923  | 0.175627  | 0.144123     | 0.047852159 |
| 1          | rs10889251 | 0.426523  | 0.471901     | 0.047879006 |
| 2          | rs10210269 | 0.218638  | 0.183538     | 0.047879006 |
| 2          | rs13026184 | 0.21147   | 0.250681     | 0.047879006 |
| 3          | rs2268846  | 0.365591  | 0.410082     | 0.047879006 |
| 6          | rs1409889  | 0.125448  | 0.158487     | 0.047879006 |
| 10         | rs901683   | 0.0501792 | 0.0733992    | 0.047879006 |
| 13         | rs7983344  | 0.453405  | 0.498298     | 0.047879006 |
| 15         | rs1797230  | 0.365591  | 0.410361     | 0.047879006 |
| 20         | rs6047359  | 0.322581  | 0.281868     | 0.047879006 |
| 21         | rs2830416  | 0.202509  | 0.168256     | 0.047879006 |
| 1          | rs2807323  | 0.307554  | 0.350716     | 0.047905868 |
| 4          | rs6835151  | 0.115108  | 0.146708     | 0.047905868 |
| 6          | rs9369470  | 0.28777   | 0.248297     | 0.047905868 |
| 6          | rs1928467  | 0.390288  | 0.347189     | 0.047905868 |
| 13         | rs7994174  | 0.0842294 | 0.112381     | 0.047905868 |
| 20         | rs6072606  | 0.283154  | 0.244467     | 0.047905868 |
| 2          | rs17008057 | 0.0663082 | 0.0920738    | 0.047932746 |
| 6          | rs9378305  | 0.0698925 | 0.0499489    | 0.047932746 |
| 8          | rs2609617  | 0.217391  | 0.181911     | 0.047932746 |
| 12         | rs7960487  | 0.501799  | 0.45707      | 0.047932746 |
| 14         | rs971591   | 0.0920578 | 0.121067     | 0.047932746 |
| 17         | rs226235   | 0.419355  | 0.375383     | 0.047932746 |
| 18         | rs2282635  | 0.322581  | 0.28206      | 0.047932746 |
| 20         | rs4468878  | 0.469424  | 0.424429     | 0.047932746 |
| 22         | rs8881     | 0.102518  | 0.132789     | 0.047932746 |
| 2          | rs10183916 | 0.514388  | 0.469005     | 0.04795964  |
| 3          | rs4679576  | 0.458484  | 0.413347     | 0.04795964  |
| 3          | rs6809730  | 0.338129  | 0.382082     | 0.04795964  |
| 4          | rs4541577  | 0.363309  | 0.320674     | 0.04795964  |
| 6          | rs380883   | 0.498208  | 0.454019     | 0.04795964  |
| 13         | rs1571627  | 0.062724  | 0.0879046    | 0.04795964  |
| 2          | rs13002286 | 0.37276   | 0.417234     | 0.04798655  |
| 3          | rs11716288 | 0.507168  | 0.462219     | 0.04798655  |
| 7          | rs1721393  | 0.52509   | 0.479898     | 0.04798655  |
| 7          | rs2971955  | 0.40681   | 0.363621     | 0.04798655  |
| 11         | rs7952054  | 0.0881295 | 0.0653506    | 0.04798655  |
| 12         | rs1548968  | 0.455036  | 0.500512     | 0.04798655  |
| 13         | rs9559201  | 0.283394  | 0.325213     | 0.04798655  |
| 14         | rs11160184 | 0.134409  | 0.167804     | 0.04798655  |
| 20         | rs2867064  | 0.231183  | 0.195637     | 0.04798655  |
| 20         | rs16991114 | 0.125448  | 0.0986662    | 0.04798655  |
| 2          | rs6740991  | 0.188172  | 0.225299     | 0.048013476 |

Table DS2: All SNPs tested for association (RDC SABP vs. controls) with the Cochran-Armitage trend test and significant at the p=0.05 threshold.

| chromosome | SNP        | MAF_cases | MAF_controls | p_value     |
|------------|------------|-----------|--------------|-------------|
| 2          | rs868392   | 0.351254  | 0.309621     | 0.048013476 |
| 3          | rs1729975  | 0.157706  | 0.127341     | 0.048013476 |
| 4          | rs17605639 | 0.302867  | 0.263633     | 0.048013476 |
| 4          | rs763540   | 0.258065  | 0.220764     | 0.048013476 |
| 5          | rs248203   | 0.198556  | 0.236636     | 0.048013476 |
| 11         | rs7124287  | 0.487455  | 0.442701     | 0.048013476 |
| 13         | rs9534176  | 0.200717  | 0.238923     | 0.048013476 |
| 13         | rs1878410  | 0.315412  | 0.358848     | 0.048013476 |
| 14         | rs1076317  | 0.505376  | 0.460082     | 0.048013476 |
| 2          | rs6548038  | 0.317204  | 0.276302     | 0.048040417 |
| 4          | rs10017241 | 0.261649  | 0.22385      | 0.048040417 |
| 12         | rs7138452  | 0.257194  | 0.219516     | 0.048040417 |
| 13         | rs9559192  | 0.282374  | 0.32408      | 0.048040417 |
| 15         | rs1869126  | 0.141577  | 0.175639     | 0.048040417 |
| 16         | rs17836505 | 0.519713  | 0.474446     | 0.048040417 |
| 21         | rs2827976  | 0.134892  | 0.168827     | 0.048040417 |
| 1          | rs3815226  | 0.220217  | 0.18552      | 0.048067375 |
| 5          | rs1021767  | 0.0340502 | 0.0543812    | 0.048067375 |
| 5          | rs467610   | 0.282374  | 0.243188     | 0.048067375 |
| 13         | rs7489996  | 0.327899  | 0.286737     | 0.048067375 |
| 16         | rs7199581  | 0.152878  | 0.188332     | 0.048067375 |
| 3          | rs9859908  | 0.456989  | 0.412747     | 0.048094349 |
| 4          | rs7698375  | 0.170251  | 0.207255     | 0.048094349 |
| 4          | rs17278402 | 0.324373  | 0.283453     | 0.048094349 |
| 5          | rs17445675 | 0.201439  | 0.239434     | 0.048094349 |
| 8          | rs933115   | 0.372302  | 0.416724     | 0.048094349 |
| 21         | rs1817114  | 0.34767   | 0.391601     | 0.048094349 |
| 6          | rs6916431  | 0.327957  | 0.287615     | 0.048121338 |
| 6          | rs1115650  | 0.410394  | 0.45501      | 0.048121338 |
| 7          | rs7780638  | 0.100358  | 0.129857     | 0.048121338 |
| 8          | rs7821329  | 0.408602  | 0.453599     | 0.048121338 |
| 9          | rs4978618  | 0.378136  | 0.335037     | 0.048121338 |
| 10         | rs1936861  | 0.130824  | 0.164113     | 0.048121338 |
| 12         | rs2342468  | 0.245487  | 0.286687     | 0.048121338 |
| 19         | rs10853854 | 0.356631  | 0.314714     | 0.048121338 |
| 21         | rs9305974  | 0.133574  | 0.105559     | 0.048121338 |
| 3          | rs13084863 | 0.4319    | 0.477482     | 0.048148344 |
| 11         | rs2593756  | 0.33574   | 0.293586     | 0.048148344 |
| 11         | rs1784230  | 0.367384  | 0.411474     | 0.048148344 |
| 14         | rs7140461  | 0.380866  | 0.337884     | 0.048148344 |
| 15         | rs8042305  | 0.308664  | 0.26889      | 0.048148344 |
| 18         | rs6508654  | 0.165468  | 0.201431     | 0.048148344 |
| 1          | rs17606320 | 0.303957  | 0.347241     | 0.048175366 |
| 1          | rs12744326 | 0.285199  | 0.246424     | 0.048175366 |
| 5          | rs6887937  | 0.284173  | 0.326621     | 0.048175366 |
| 7          | rs2535960  | 0.129032  | 0.101333     | 0.048175366 |
| 8          | rs4841409  | 0.464158  | 0.419052     | 0.048175366 |
| 11         | rs531836   | 0.512545  | 0.467791     | 0.048175366 |
| 12         | rs10778364 | 0.431655  | 0.47701      | 0.048175366 |
| 13         | rs16955246 | 0.0806452 | 0.0592845    | 0.048175366 |
| 2          | rs17633730 | 0.0341727 | 0.0544774    | 0.048202403 |
| 4          | rs10488946 | 0.0698925 | 0.0958461    | 0.048202403 |

Table DS2: All SNPs tested for association (RDC SABP vs. controls) with the Cochran-Armitage trend test and significant at the p=0.05 threshold.

| chromosome | SNP           | MAF_cases | MAF_controls | p_value     |
|------------|---------------|-----------|--------------|-------------|
| 4          | rs1425626     | 0.437276  | 0.393504     | 0.048202403 |
| 5          | rs168894      | 0.222222  | 0.261507     | 0.048202403 |
| 5          | rs17637311    | 0.121864  | 0.154226     | 0.048202403 |
| 8          | rs7002130     | 0.206835  | 0.245659     | 0.048202403 |
| 13         | rs7985746     | 0.327957  | 0.28698      | 0.048202403 |
| 17         | rs7212461     | 0.202509  | 0.16888      | 0.048202403 |
| 17         | rs9899602     | 0.319495  | 0.278535     | 0.048202403 |
| 5          | rs13164082    | 0.311151  | 0.354294     | 0.048229457 |
| 5          | rs6878443     | 0.324373  | 0.367838     | 0.048229457 |
| 8          | rs13252450    | 0.297491  | 0.258521     | 0.048229457 |
| 10         | rs7084645     | 0.408602  | 0.453678     | 0.048229457 |
| 11         | rs10893622    | 0.290323  | 0.250682     | 0.048229457 |
| 13         | rs9568732     | 0.444444  | 0.489605     | 0.048229457 |
| 17         | rs12940382    | 0.333333  | 0.291965     | 0.048229457 |
| 17         | rs16971269    | 0.234767  | 0.275621     | 0.048229457 |
| 10         | rs1763404     | 0.105735  | 0.0806892    | 0.048256526 |
| 10         | rs2393478     | 0.259857  | 0.222203     | 0.048256526 |
| 13         | SNP_A-1943377 | 0.139785  | 0.111452     | 0.048256526 |
| 4          | SNP_A-2163545 | 0.0806452 | 0.108177     | 0.048283612 |
| 4          | rs10010798    | 0.190647  | 0.228109     | 0.048283612 |
| 5          | rs13157625    | 0.155914  | 0.190801     | 0.048283612 |
| 6          | rs7761118     | 0.0698925 | 0.096049     | 0.048283612 |
| 8          | rs1396981     | 0.222222  | 0.186455     | 0.048283612 |
| 10         | rs2537626     | 0.390681  | 0.347974     | 0.048283612 |
| 15         | rs8027222     | 0.24552   | 0.286275     | 0.048283612 |
| 2          | rs10173566    | 0.0719424 | 0.0517711    | 0.048310714 |
| 7          | rs10487823    | 0.229391  | 0.193763     | 0.048310714 |
| 9          | rs8177800     | 0.0503597 | 0.0733492    | 0.048310714 |
| 17         | rs9897724     | 0.5       | 0.455397     | 0.048310714 |
| 21         | rs9976865     | 0.358423  | 0.402631     | 0.048310714 |
| 1          | rs17448695    | 0.109319  | 0.0838446    | 0.048337832 |
| 2          | rs11682884    | 0.125448  | 0.0983635    | 0.048337832 |
| 3          | rs3906014     | 0.207885  | 0.245829     | 0.048337832 |
| 4          | SNP_A-2028680 | 0.403986  | 0.359748     | 0.048337832 |
| 8          | rs7463586     | 0.378136  | 0.335322     | 0.048337832 |
| 10         | rs11009599    | 0.295699  | 0.255889     | 0.048337832 |
| 13         | rs6490805     | 0.250896  | 0.291482     | 0.048337832 |
| 13         | rs2257612     | 0.150538  | 0.120743     | 0.048337832 |
| 4          | rs17488814    | 0.297491  | 0.340436     | 0.048364966 |
| 5          | rs13353876    | 0.473118  | 0.427694     | 0.048364966 |
| 6          | rs446242      | 0.498208  | 0.454096     | 0.048364966 |
| 3          | rs7651618     | 0.131295  | 0.103578     | 0.048392115 |
| 4          | rs10020466    | 0.231183  | 0.270805     | 0.048392115 |
| 6          | rs7744950     | 0.421147  | 0.377429     | 0.048392115 |
| 11         | rs12418104    | 0.140288  | 0.111811     | 0.048392115 |
| 11         | rs1121656     | 0.284946  | 0.327539     | 0.048392115 |
| 11         | rs4937700     | 0.387097  | 0.34441      | 0.048392115 |
| 16         | rs11574635    | 0.155914  | 0.190525     | 0.048392115 |
| 16         | rs375862      | 0.289568  | 0.332199     | 0.048392115 |
| 2          | rs2422239     | 0.411871  | 0.456559     | 0.048419282 |
| 2          | SNP_A-1844635 | 0.0860215 | 0.0638624    | 0.048419282 |
| 3          | rs4678137     | 0.229391  | 0.269663     | 0.048419282 |

Table DS2: All SNPs tested for association (RDC SABP vs. controls) with the Cochran-Armitage trend test and significant at the p=0.05 threshold.

| chromosome | SNP           | MAF_cases | MAF_controls | p_value     |
|------------|---------------|-----------|--------------|-------------|
| 8          | rs7833121     | 0.044964  | 0.0675307    | 0.048419282 |
| 10         | rs1739775     | 0.123636  | 0.156282     | 0.048419282 |
| 11         | rs6590613     | 0.272401  | 0.23389      | 0.048419282 |
| 1          | rs11206127    | 0.383513  | 0.42823      | 0.048446464 |
| 1          | rs3830178     | 0.272401  | 0.313759     | 0.048446464 |
| 9          | rs7848919     | 0.285971  | 0.32862      | 0.048446464 |
| 9          | rs10116313    | 0.103943  | 0.134445     | 0.048446464 |
| 1          | rs3737741     | 0.487455  | 0.442531     | 0.048473662 |
| 1          | rs12031265    | 0.0698925 | 0.0964942    | 0.048473662 |
| 8          | rs11778610    | 0.297491  | 0.258509     | 0.048473662 |
| 10         | rs998404      | 0.366906  | 0.410672     | 0.048473662 |
| 12         | rs7961581     | 0.315412  | 0.274991     | 0.048473662 |
| 14         | rs7152672     | 0.415771  | 0.371935     | 0.048473662 |
| 1          | rs10783063    | 0.0949821 | 0.123978     | 0.048500876 |
| 2          | rs6750019     | 0.366426  | 0.32385      | 0.048500876 |
| 2          | rs533833      | 0.0734767 | 0.100443     | 0.048500876 |
| 5          | rs26642       | 0.456989  | 0.502048     | 0.048500876 |
| 12         | rs7977406     | 0.336918  | 0.296322     | 0.048500876 |
| 12         | rs6486438     | 0.354317  | 0.312756     | 0.048500876 |
| 1          | rs2008968     | 0.0734767 | 0.100136     | 0.048528107 |
| 1          | rs10916203    | 0.399642  | 0.443818     | 0.048528107 |
| 2          | SNP_A-1871180 | 0.100358  | 0.13096      | 0.048528107 |
| 4          | rs2306597     | 0.240143  | 0.203963     | 0.048528107 |
| 4          | rs17393306    | 0.0394265 | 0.0608592    | 0.048528107 |
| 5          | rs17308909    | 0.327338  | 0.286347     | 0.048528107 |
| 11         | rs2736526     | 0.0806452 | 0.108399     | 0.048528107 |
| 11         | rs12275977    | 0.0752688 | 0.0547992    | 0.048528107 |
| 12         | rs10843179    | 0.365108  | 0.323279     | 0.048528107 |
| 13         | rs1570607     | 0.0860215 | 0.114295     | 0.048528107 |
| 14         | rs1024510     | 0.145161  | 0.116354     | 0.048528107 |
| 15         | rs1025141     | 0.365591  | 0.410252     | 0.048528107 |
| 5          | rs6868483     | 0.353261  | 0.311369     | 0.048555353 |
| 6          | rs7755513     | 0.137993  | 0.171832     | 0.048555353 |
| 6          | rs4458703     | 0.222222  | 0.186882     | 0.048555353 |
| 11         | rs17140393    | 0.125899  | 0.0988075    | 0.048555353 |
| 12         | rs10773263    | 0.439068  | 0.395365     | 0.048555353 |
| 2          | rs6736757     | 0.0773381 | 0.0564076    | 0.048582616 |
| 2          | rs10188509    | 0.491039  | 0.446204     | 0.048582616 |
| 3          | rs17705803    | 0.433453  | 0.389533     | 0.048582616 |
| 5          | rs12523226    | 0.170251  | 0.206514     | 0.048582616 |
| 5          | rs154447      | 0.249104  | 0.290256     | 0.048582616 |
| 5          | rs329470      | 0.510753  | 0.466951     | 0.048582616 |
| 11         | rs1541301     | 0.458633  | 0.41468      | 0.048582616 |
| 11         | rs1625168     | 0.11828   | 0.150477     | 0.048582616 |
| 12         | rs11113205    | 0.333333  | 0.37696      | 0.048582616 |
| 13         | SNP_A-2128389 | 0.283154  | 0.324702     | 0.048582616 |
| 14         | rs7140430     | 0.381295  | 0.338396     | 0.048582616 |
| 18         | rs9961728     | 0.0809353 | 0.0597474    | 0.048582616 |
| 20         | SNP_A-2212377 | 0.321942  | 0.281186     | 0.048582616 |
| 2          | rs3769440     | 0.510753  | 0.465781     | 0.048609895 |
| 4          | rs17013544    | 0.218638  | 0.183691     | 0.048609895 |
| 5          | rs17252695    | 0.178058  | 0.146217     | 0.048609895 |

Table DS2: All SNPs tested for association (RDC SABP vs. controls) with the Cochran-Armitage trend test and significant at the p=0.05 threshold.

| chromosome | SNP        | MAF_cases | MAF_controls | p_value     |
|------------|------------|-----------|--------------|-------------|
| 5          | rs10040679 | 0.106115  | 0.136968     | 0.048609895 |
| 7          | rs4535659  | 0.167266  | 0.136147     | 0.048609895 |
| 10         | rs1925279  | 0.318996  | 0.278233     | 0.048609895 |
| 17         | rs6607284  | 0.329137  | 0.372486     | 0.048609895 |
| 20         | rs998422   | 0.377698  | 0.422029     | 0.048609895 |
| 1          | rs2884876  | 0.125448  | 0.0983997    | 0.04863719  |
| 3          | rs931913   | 0.37276   | 0.330381     | 0.04863719  |
| 8          | rs11783615 | 0.107914  | 0.138747     | 0.04863719  |
| 8          | rs7840012  | 0.200717  | 0.239012     | 0.04863719  |
| 9          | rs4979472  | 0.47491   | 0.430541     | 0.04863719  |
| 13         | rs7329170  | 0.0377698 | 0.0583929    | 0.04863719  |
| 14         | rs17110870 | 0.182796  | 0.150375     | 0.04863719  |
| 2          | rs10495583 | 0.0985663 | 0.0748125    | 0.048664501 |
| 2          | rs1823913  | 0.28853   | 0.330095     | 0.048664501 |
| 6          | rs12530352 | 0.0913978 | 0.120743     | 0.048664501 |
| 7          | rs2079961  | 0.333333  | 0.292462     | 0.048664501 |
| 8          | rs6995112  | 0.272401  | 0.313736     | 0.048664501 |
| 10         | rs16927368 | 0.0681004 | 0.0486348    | 0.048664501 |
| 11         | rs1784515  | 0.154122  | 0.123977     | 0.048664501 |
| 16         | rs226043   | 0.28777   | 0.248806     | 0.048664501 |
| 1          | rs12021529 | 0.489247  | 0.444653     | 0.048691829 |
| 1          | rs11249429 | 0.331541  | 0.374573     | 0.048691829 |
| 3          | rs7426620  | 0.389091  | 0.434264     | 0.048691829 |
| 4          | rs2071678  | 0.168459  | 0.204971     | 0.048691829 |
| 8          | rs7822258  | 0.408602  | 0.453492     | 0.048691829 |
| 9          | rs7039253  | 0.507168  | 0.462534     | 0.048691829 |
| 13         | rs12873209 | 0.0971223 | 0.126449     | 0.048691829 |
| 21         | rs388700   | 0.462094  | 0.417916     | 0.048691829 |
| 5          | rs4342276  | 0.205776  | 0.244637     | 0.048719172 |
| 6          | rs532230   | 0.326165  | 0.36932      | 0.048719172 |
| 7          | rs6945104  | 0.419355  | 0.375554     | 0.048719172 |
| 11         | rs10502133 | 0.16129   | 0.130798     | 0.048719172 |
| 18         | rs12717074 | 0.505396  | 0.460136     | 0.048719172 |
| 19         | rs273619   | 0.37276   | 0.416581     | 0.048719172 |
| 6          | rs186237   | 0.336918  | 0.29571      | 0.048746532 |
| 7          | rs12113716 | 0.177419  | 0.214067     | 0.048746532 |
| 8          | rs10090183 | 0.123656  | 0.155941     | 0.048746532 |
| 15         | rs687124   | 0.280576  | 0.3236       | 0.048746532 |
| 22         | rs139314   | 0.290323  | 0.33322      | 0.048746532 |
| 4          | rs11132967 | 0.478495  | 0.433924     | 0.048773908 |
| 5          | rs13180912 | 0.0917266 | 0.120819     | 0.048773908 |
| 8          | rs6987103  | 0.40681   | 0.451822     | 0.048773908 |
| 10         | rs11251508 | 0.476703  | 0.432027     | 0.048773908 |
| 20         | rs6068321  | 0.109319  | 0.0844399    | 0.048773908 |
| 22         | rs137954   | 0.15233   | 0.122271     | 0.048773908 |
| 1          | rs10874255 | 0.444444  | 0.489612     | 0.048801301 |
| 4          | rs6821250  | 0.322581  | 0.365779     | 0.048801301 |
| 6          | rs513041   | 0.458633  | 0.414364     | 0.048801301 |
| 6          | rs2225906  | 0.210432  | 0.249489     | 0.048801301 |
| 10         | rs1591815  | 0.374552  | 0.332538     | 0.048801301 |
| 11         | rs883724   | 0.163082  | 0.132153     | 0.048801301 |
| 14         | rs7143932  | 0.133094  | 0.16644      | 0.048801301 |

Table DS2: All SNPs tested for association (RDC SABP vs. controls) with the Cochran-Armitage trend test and significant at the p=0.05 threshold.

| chromosome | SNP        | MAF_cases | MAF_controls | p_value     |
|------------|------------|-----------|--------------|-------------|
| 1          | rs10782894 | 0.0860215 | 0.0636487    | 0.048828709 |
| 3          | rs10804839 | 0.505376  | 0.459823     | 0.048828709 |
| 5          | rs27574    | 0.131295  | 0.103713     | 0.048828709 |
| 6          | rs11756035 | 0.111111  | 0.142274     | 0.048828709 |
| 9          | rs7039459  | 0.121864  | 0.095092     | 0.048828709 |
| 9          | rs10512003 | 0.327957  | 0.371424     | 0.048828709 |
| 10         | rs11259193 | 0.173835  | 0.141763     | 0.048828709 |
| 13         | rs860316   | 0.113309  | 0.0876535    | 0.048828709 |
| 14         | rs11628824 | 0.342294  | 0.385992     | 0.048828709 |
| 2          | rs1367203  | 0.169675  | 0.205963     | 0.048856134 |
| 2          | rs7573045  | 0.267025  | 0.228528     | 0.048856134 |
| 4          | rs6821599  | 0.120504  | 0.0943364    | 0.048856134 |
| 6          | rs1551115  | 0.385305  | 0.429009     | 0.048856134 |
| 8          | rs279626   | 0.348921  | 0.393417     | 0.048856134 |
| 10         | rs2504249  | 0.155914  | 0.125298     | 0.048856134 |
| 11         | rs531005   | 0.516129  | 0.47119      | 0.048856134 |
| 21         | rs2837489  | 0.390681  | 0.435434     | 0.048856134 |
| 4          | rs9291652  | 0.428058  | 0.473083     | 0.048883575 |
| 4          | rs10489000 | 0.173835  | 0.210221     | 0.048883575 |
| 6          | rs12213051 | 0.446237  | 0.402181     | 0.048883575 |
| 7          | rs3801161  | 0.225806  | 0.265588     | 0.048883575 |
| 13         | rs2805606  | 0.133094  | 0.105209     | 0.048883575 |
| 3          | rs916217   | 0.102151  | 0.132072     | 0.048911033 |
| 3          | rs10935165 | 0.202509  | 0.16894      | 0.048911033 |
| 5          | rs1664781  | 0.268817  | 0.309646     | 0.048911033 |
| 5          | rs10079961 | 0.118705  | 0.0924413    | 0.048911033 |
| 6          | rs1233495  | 0.314748  | 0.274276     | 0.048911033 |
| 6          | rs859981   | 0.532374  | 0.487389     | 0.048911033 |
| 6          | rs17449356 | 0.228417  | 0.192504     | 0.048911033 |
| 9          | rs16907323 | 0.0863309 | 0.11448      | 0.048911033 |
| 14         | rs11157351 | 0.0842294 | 0.0620737    | 0.048911033 |
| 15         | rs7048     | 0.0845324 | 0.112534     | 0.048911033 |
| 18         | rs2612321  | 0.160072  | 0.129863     | 0.048911033 |
| 1          | rs12029109 | 0.0734767 | 0.0532242    | 0.048938506 |
| 3          | rs1386332  | 0.242806  | 0.282475     | 0.048938506 |
| 5          | rs163725   | 0.0521583 | 0.0757006    | 0.048938506 |
| 7          | rs11760903 | 0.345878  | 0.389343     | 0.048938506 |
| 8          | rs10808826 | 0.34767   | 0.391216     | 0.048938506 |
| 10         | rs10884678 | 0.0685921 | 0.0490798    | 0.048938506 |
| 11         | rs10832645 | 0.183453  | 0.220553     | 0.048938506 |
| 13         | rs17597090 | 0.0322581 | 0.0514831    | 0.048938506 |
| 14         | rs7140165  | 0.267025  | 0.228868     | 0.048938506 |
| 19         | rs1078373  | 0.396057  | 0.353663     | 0.048938506 |
| 2          | rs2954959  | 0.236462  | 0.275656     | 0.048965996 |
| 3          | rs9311811  | 0.458781  | 0.503753     | 0.048965996 |
| 5          | rs4482855  | 0.455197  | 0.5          | 0.048965996 |
| 7          | rs10230949 | 0.0430108 | 0.0643784    | 0.048965996 |
| 7          | rs7802831  | 0.164875  | 0.133901     | 0.048965996 |
| 8          | rs7008889  | 0.173835  | 0.142614     | 0.048965996 |
| 9          | rs1930734  | 0.210432  | 0.249403     | 0.048965996 |
| 10         | rs10437405 | 0.336918  | 0.380457     | 0.048965996 |
| 14         | rs4905528  | 0.521583  | 0.476312     | 0.048965996 |

Table DS2 All SNPs tested for association (RDC SABP vs. controls) with the Cochran-Armitage trend test and significant at the p=0.05 threshold.

| chromosome | SNP        | MAF_cases | MAF_controls | p_value     |
|------------|------------|-----------|--------------|-------------|
| 19         | rs12984744 | 0.329749  | 0.289581     | 0.048965996 |
| 2          | rs10190732 | 0.163082  | 0.198534     | 0.048993502 |
| 2          | rs10197133 | 0.133574  | 0.167745     | 0.048993502 |
| 2          | rs10175549 | 0.243728  | 0.283498     | 0.048993502 |
| 4          | rs7689553  | 0.444444  | 0.400341     | 0.048993502 |
| 8          | rs1123828  | 0.18638   | 0.223944     | 0.048993502 |
| 9          | rs10991510 | 0.108303  | 0.0831913    | 0.048993502 |
| 12         | rs4569092  | 0.105735  | 0.13658      | 0.048993502 |
| 13         | rs1576158  | 0.401434  | 0.358311     | 0.048993502 |
| 15         | rs2219507  | 0.229391  | 0.193449     | 0.048993502 |
| 15         | rs11637762 | 0.360215  | 0.403682     | 0.048993502 |
| 16         | rs12597431 | 0.419065  | 0.375554     | 0.048993502 |
| 1          | rs12032100 | 0.215827  | 0.255119     | 0.049021025 |
| 1          | rs4926337  | 0.331541  | 0.290531     | 0.049021025 |
| 1          | rs2994429  | 0.115523  | 0.146949     | 0.049021025 |
| 1          | rs12739927 | 0.078853  | 0.106521     | 0.049021025 |
| 3          | rs7650415  | 0.439068  | 0.483629     | 0.049021025 |
| 4          | rs2319914  | 0.408273  | 0.452965     | 0.049021025 |
| 5          | rs328830   | 0.0794224 | 0.107094     | 0.049021025 |
| 6          | rs7766115  | 0.458781  | 0.502898     | 0.049021025 |
| 6          | rs4715852  | 0.138989  | 0.17292      | 0.049021025 |
| 9          | rs6559686  | 0.365591  | 0.323048     | 0.049021025 |
| 10         | rs10828610 | 0.301075  | 0.260662     | 0.049021025 |
| 10         | rs4751481  | 0.130824  | 0.16394      | 0.049021025 |
| 15         | rs345778   | 0.134409  | 0.106608     | 0.049021025 |
| 18         | rs1822445  | 0.341727  | 0.385651     | 0.049021025 |
| 20         | rs2268084  | 0.428315  | 0.473102     | 0.049021025 |
| 2          | rs6433680  | 0.0860215 | 0.0638189    | 0.049048564 |
| 5          | rs354616   | 0.0752688 | 0.0545703    | 0.049048564 |
| 8          | rs2670073  | 0.345878  | 0.389135     | 0.049048564 |
| 11         | rs16922394 | 0.0806452 | 0.108421     | 0.049048564 |
| 15         | rs1501419  | 0.310469  | 0.353783     | 0.049048564 |
| 20         | rs6134624  | 0.0573477 | 0.0817996    | 0.049048564 |
| 1          | rs11264728 | 0.374101  | 0.331514     | 0.049076119 |
| 3          | rs7642276  | 0.236559  | 0.200409     | 0.049076119 |
| 3          | rs16839969 | 0.282374  | 0.324651     | 0.049076119 |
| 4          | rs1370459  | 0.121864  | 0.154174     | 0.049076119 |
| 7          | rs2346443  | 0.410394  | 0.367291     | 0.049076119 |
| 10         | rs10764478 | 0.292115  | 0.252981     | 0.049076119 |
| 15         | rs7170842  | 0.0394265 | 0.0605335    | 0.049076119 |
| 1          | rs7537494  | 0.378136  | 0.422317     | 0.049103691 |
| 12         | rs792474   | 0.25      | 0.290273     | 0.049103691 |
| 14         | rs17115728 | 0.0519713 | 0.0759537    | 0.049103691 |
| 14         | rs2164950  | 0.100358  | 0.130746     | 0.049103691 |
| 20         | rs2223542  | 0.311151  | 0.353683     | 0.049103691 |
| 3          | rs11713266 | 0.173835  | 0.142711     | 0.049131279 |
| 8          | rs1038192  | 0.426523  | 0.471721     | 0.049131279 |
| 11         | rs2351044  | 0.419355  | 0.375725     | 0.049131279 |
| 11         | rs674306   | 0.342294  | 0.385534     | 0.049131279 |
| 15         | rs9920144  | 0.344086  | 0.302112     | 0.049131279 |
| 18         | rs4798520  | 0.442652  | 0.398909     | 0.049131279 |
| 22         | rs11705515 | 0.22482   | 0.189033     | 0.049131279 |

Table DS2: All SNPs tested for association (RDC SABP vs. controls) with the Cochran-Armitage trend test and significant at the p=0.05 threshold.

| chromosome | SNP        | MAF_cases | MAF_controls | p_value     |
|------------|------------|-----------|--------------|-------------|
| 1          | rs17726097 | 0.0938628 | 0.0705521    | 0.049158883 |
| 1          | rs3856108  | 0.359712  | 0.40399      | 0.049158883 |
| 3          | rs7627715  | 0.159498  | 0.129131     | 0.049158883 |
| 3          | rs10513733 | 0.0430108 | 0.064758     | 0.049158883 |
| 11         | rs10792758 | 0.339928  | 0.298431     | 0.049158883 |
| 15         | rs7177058  | 0.0913978 | 0.0687244    | 0.049158883 |
| 21         | rs4239804  | 0.308244  | 0.350868     | 0.049158883 |
| 2          | rs1221175  | 0.534296  | 0.489227     | 0.049186504 |
| 6          | rs620250   | 0.535842  | 0.490273     | 0.049186504 |
| 6          | rs6935481  | 0.27957   | 0.321404     | 0.049186504 |
| 7          | rs17372719 | 0.391697  | 0.437052     | 0.049186504 |
| 7          | rs11982160 | 0.401434  | 0.358018     | 0.049186504 |
| 9          | rs10962543 | 0.0483871 | 0.0708206    | 0.049186504 |
| 11         | rs2513441  | 0.396057  | 0.441227     | 0.049186504 |
| 14         | rs7160841  | 0.102518  | 0.13314      | 0.049186504 |
| 1          | rs4655650  | 0.473022  | 0.42823      | 0.049214141 |
| 4          | rs2345047  | 0.354317  | 0.398227     | 0.049214141 |
| 14         | rs1022849  | 0.0953237 | 0.0717451    | 0.049214141 |
| 1          | rs17386462 | 0.222222  | 0.186882     | 0.049241794 |
| 2          | rs7557984  | 0.16129   | 0.196866     | 0.049241794 |
| 8          | rs16870012 | 0.0448029 | 0.0672684    | 0.049241794 |
| 9          | rs7870160  | 0.408602  | 0.453152     | 0.049241794 |
| 16         | rs2875855  | 0.155914  | 0.190906     | 0.049241794 |
| 21         | rs1556311  | 0.189964  | 0.226994     | 0.049241794 |
| 6          | rs10872331 | 0.164875  | 0.134366     | 0.049269464 |
| 8          | rs10866818 | 0.0824373 | 0.110352     | 0.049269464 |
| 16         | rs7189366  | 0.179856  | 0.216997     | 0.049269464 |
| 17         | rs12602266 | 0.245487  | 0.208433     | 0.049269464 |
| 17         | rs2854311  | 0.417563  | 0.373467     | 0.049269464 |
| 3          | rs12629030 | 0.137993  | 0.171721     | 0.04929715  |
| 6          | rs852928   | 0.402527  | 0.359823     | 0.04929715  |
| 6          | rs6924755  | 0.464029  | 0.419619     | 0.04929715  |
| 13         | rs2491039  | 0.439068  | 0.48364      | 0.04929715  |
| 13         | rs7992207  | 0.177419  | 0.145414     | 0.04929715  |
| 20         | rs6048285  | 0.446237  | 0.402248     | 0.04929715  |
| 22         | rs5756505  | 0.438628  | 0.39445      | 0.04929715  |
| 2          | rs12233096 | 0.33871   | 0.297205     | 0.049324853 |
| 5          | rs163811   | 0.0537634 | 0.0773688    | 0.049324853 |
| 12         | rs17031540 | 0.109319  | 0.140348     | 0.049324853 |
| 2          | rs13017199 | 0.326165  | 0.369157     | 0.049352572 |
| 3          | rs10510356 | 0.4319    | 0.387432     | 0.049352572 |
| 3          | rs869023   | 0.369176  | 0.327428     | 0.049352572 |
| 7          | rs2402762  | 0.424731  | 0.38092      | 0.049352572 |
| 17         | rs12937224 | 0.489247  | 0.444444     | 0.049352572 |
| 19         | rs10405214 | 0.216846  | 0.255631     | 0.049352572 |
| 21         | rs2183589  | 0.120072  | 0.0937287    | 0.049352572 |
| 22         | rs10154425 | 0.103943  | 0.07946      | 0.049352572 |
| 3          | rs1387127  | 0.267986  | 0.229956     | 0.049380308 |
| 10         | rs2133705  | 0.519784  | 0.475051     | 0.049380308 |
| 11         | rs6485257  | 0.215054  | 0.180225     | 0.049380308 |
| 11         | rs3935159  | 0.290323  | 0.332255     | 0.049380308 |
| 14         | rs858870   | 0.38172   | 0.339346     | 0.049380308 |



Table DS2: All SNPs tested for association (RDC SABP vs. controls) with the Cochran-Armitage trend test and significant at the p=0.05 threshold.

| chromosome | SNP        | MAF_cases | MAF_controls | p_value     |
|------------|------------|-----------|--------------|-------------|
| 16         | rs9927884  | 0.0949821 | 0.124319     | 0.049380308 |
| 1          | rs10908456 | 0.399642  | 0.444123     | 0.04940806  |
| 3          | rs661369   | 0.238351  | 0.202251     | 0.04940806  |
| 7          | rs3757520  | 0.448029  | 0.403885     | 0.04940806  |
| 8          | rs10100391 | 0.197842  | 0.164395     | 0.04940806  |
| 9          | rs2026341  | 0.411552  | 0.367632     | 0.04940806  |
| 21         | rs9977499  | 0.34767   | 0.391371     | 0.04940806  |
| 2          | rs3791767  | 0.229391  | 0.193422     | 0.049435829 |
| 3          | rs10513095 | 0.204301  | 0.170245     | 0.049435829 |
| 4          | rs2141474  | 0.17446   | 0.143369     | 0.049435829 |
| 5          | rs875347   | 0.496403  | 0.451992     | 0.049435829 |
| 6          | rs9343710  | 0.327957  | 0.287807     | 0.049435829 |
| 7          | rs817771   | 0.310036  | 0.269912     | 0.049435829 |
| 8          | rs10957017 | 0.133574  | 0.167065     | 0.049435829 |
| 9          | rs7022941  | 0.462366  | 0.417603     | 0.049435829 |
| 12         | rs10777845 | 0.38172   | 0.339176     | 0.049435829 |
| 13         | rs667139   | 0.413978  | 0.37083      | 0.049435829 |
| 13         | rs12583005 | 0.223022  | 0.261929     | 0.049435829 |
| 14         | rs10137523 | 0.264388  | 0.226081     | 0.049435829 |
| 15         | rs11073866 | 0.302867  | 0.262862     | 0.049435829 |
| 16         | rs996157   | 0.125448  | 0.157733     | 0.049435829 |
| 17         | rs7501897  | 0.424731  | 0.469005     | 0.049435829 |
| 19         | rs299170   | 0.320789  | 0.28013      | 0.049435829 |
| 20         | rs7269891  | 0.419355  | 0.464067     | 0.049435829 |
| 2          | rs3769714  | 0.267025  | 0.22938      | 0.049463614 |
| 3          | rs1490269  | 0.21147   | 0.249915     | 0.049463614 |
| 3          | rs12497289 | 0.172662  | 0.141056     | 0.049463614 |
| 5          | rs17830967 | 0.0824373 | 0.0607509    | 0.049463614 |
| 5          | rs16872235 | 0.150538  | 0.121083     | 0.049463614 |
| 6          | rs6453855  | 0.163082  | 0.132584     | 0.049463614 |
| 2          | rs6545480  | 0.284173  | 0.245225     | 0.049491415 |
| 3          | rs2061197  | 0.46595   | 0.421843     | 0.049491415 |
| 6          | rs7761775  | 0.103261  | 0.133652     | 0.049491415 |
| 6          | rs12191138 | 0.392473  | 0.349932     | 0.049491415 |
| 14         | rs8012389  | 0.125899  | 0.0990791    | 0.049491415 |
| 16         | rs6600143  | 0.330325  | 0.289635     | 0.049491415 |
| 16         | rs1072247  | 0.258065  | 0.220403     | 0.049491415 |
| 18         | rs586025   | 0.28853   | 0.249404     | 0.049491415 |
| 2          | rs17380029 | 0.191756  | 0.159277     | 0.049519233 |
| 2          | rs10930136 | 0.22043   | 0.185223     | 0.049519233 |
| 2          | rs10191097 | 0.491039  | 0.446374     | 0.049519233 |
| 3          | rs9831450  | 0.413357  | 0.370389     | 0.049519233 |
| 4          | rs4513557  | 0.0752688 | 0.102184     | 0.049519233 |
| 4          | rs17049611 | 0.12724   | 0.100614     | 0.049519233 |
| 6          | rs2924667  | 0.213262  | 0.178535     | 0.049519233 |
| 8          | rs6578008  | 0.464029  | 0.41985      | 0.049519233 |
| 11         | rs17304039 | 0.170863  | 0.139475     | 0.049519233 |
| 11         | rs2509563  | 0.342294  | 0.385481     | 0.049519233 |
| 16         | rs1496961  | 0.329749  | 0.37334      | 0.049519233 |
| 17         | rs1682280  | 0.349462  | 0.392541     | 0.049519233 |
| 18         | rs583639   | 0.0681004 | 0.0935902    | 0.049519233 |
| 2          | rs7559906  | 0.503636  | 0.458717     | 0.049547068 |

Table DS2 All SNPs tested for association (RDC SABP vs. controls) with the Cochran-Armitage trend test and significant at the p=0.05 threshold.

| chromosome | SNP        | MAF_cases | MAF_controls | p_value     |
|------------|------------|-----------|--------------|-------------|
| 2          | rs17430358 | 0.264388  | 0.226869     | 0.049547068 |
| 3          | rs206316   | 0.419065  | 0.374957     | 0.049547068 |
| 7          | rs1911754  | 0.158845  | 0.194142     | 0.049547068 |
| 8          | rs2583662  | 0.514388  | 0.469676     | 0.049547068 |
| 10         | rs2246538  | 0.247312  | 0.28791      | 0.049547068 |
| 12         | rs12817623 | 0.09319   | 0.122275     | 0.049547068 |
| 13         | rs9549448  | 0.213262  | 0.178754     | 0.049547068 |
| 14         | rs10483722 | 0.250896  | 0.21414      | 0.049547068 |
| 18         | rs9950986  | 0.191756  | 0.158665     | 0.049547068 |
| 19         | rs166653   | 0.372302  | 0.41607      | 0.049547068 |
| 20         | rs6072667  | 0.231183  | 0.195875     | 0.049547068 |
| 1          | rs472908   | 0.395683  | 0.440014     | 0.049574919 |
| 1          | rs12044097 | 0.15704   | 0.19236      | 0.049574919 |
| 1          | rs946263   | 0.154122  | 0.188862     | 0.049574919 |
| 2          | rs1430243  | 0.392473  | 0.437543     | 0.049574919 |
| 3          | rs1526939  | 0.204301  | 0.170586     | 0.049574919 |
| 5          | rs11749216 | 0.0806452 | 0.108784     | 0.049574919 |
| 8          | rs239463   | 0.0645161 | 0.0897611    | 0.049574919 |
| 10         | rs10764477 | 0.28853   | 0.249574     | 0.049574919 |
| 13         | rs12586046 | 0.0851449 | 0.113404     | 0.049574919 |
| 15         | rs2289439  | 0.125899  | 0.0985339    | 0.049574919 |
| 18         | rs979166   | 0.47491   | 0.431222     | 0.049574919 |
| 2          | rs17455729 | 0.0537634 | 0.0775128    | 0.049602787 |
| 9          | rs7042998  | 0.152878  | 0.123038     | 0.049602787 |
| 12         | rs2051992  | 0.122744  | 0.0962457    | 0.049602787 |
| 12         | rs4612882  | 0.134409  | 0.167633     | 0.049602787 |
| 16         | rs182626   | 0.224014  | 0.263454     | 0.049602787 |
| 21         | rs2837073  | 0.308244  | 0.350817     | 0.049602787 |
| 5          | rs4912644  | 0.073741  | 0.0533151    | 0.049630671 |
| 9          | rs1930357  | 0.277778  | 0.239775     | 0.049630671 |
| 12         | rs1732771  | 0.433692  | 0.389608     | 0.049630671 |
| 20         | rs259971   | 0.456989  | 0.413317     | 0.049630671 |
| 1          | rs17563262 | 0.209677  | 0.175579     | 0.049658571 |
| 5          | rs10053728 | 0.498208  | 0.454003     | 0.049658571 |
| 8          | rs4734386  | 0.403226  | 0.359679     | 0.049658571 |
| 12         | rs7311488  | 0.21223   | 0.177853     | 0.049658571 |
| 6          | rs1778297  | 0.34296   | 0.386789     | 0.049686489 |
| 8          | rs16910319 | 0.145683  | 0.179884     | 0.049686489 |
| 11         | rs1816999  | 0.467626  | 0.423391     | 0.049686489 |
| 1          | rs3819981  | 0.329749  | 0.288567     | 0.049714423 |
| 6          | rs9365794  | 0.410394  | 0.454685     | 0.049714423 |
| 7          | rs782055   | 0.351254  | 0.308989     | 0.049714423 |
| 11         | rs7106914  | 0.501792  | 0.457595     | 0.049714423 |
| 17         | rs9914579  | 0.5       | 0.455351     | 0.049714423 |
| 17         | rs203097   | 0.227599  | 0.267723     | 0.049714423 |
| 18         | rs7408096  | 0.494624  | 0.450358     | 0.049714423 |
| 18         | rs17487277 | 0.370504  | 0.414763     | 0.049714423 |
| 6          | rs9377715  | 0.419065  | 0.463664     | 0.049742373 |
| 8          | rs1598260  | 0.306452  | 0.348909     | 0.049742373 |
| 10         | rs1080845  | 0.0665468 | 0.0927378    | 0.049742373 |
| 10         | rs7090540  | 0.168459  | 0.137078     | 0.049742373 |
| 10         | rs7908601  | 0.0806452 | 0.107836     | 0.049742373 |

Table DS2 All SNPs tested for association (RDC SABP vs. controls) with the Cochran-Armitage trend test and significant at the p=0.05 threshold.

| chromosome | SNP           | MAF_cases | MAF_controls | p_value     |
|------------|---------------|-----------|--------------|-------------|
| 12         | rs10506460    | 0.146953  | 0.117807     | 0.049742373 |
| 14         | rs2149649     | 0.327957  | 0.28698      | 0.049742373 |
| 21         | rs2832131     | 0.133574  | 0.166383     | 0.049742373 |
| 21         | rs2000434     | 0.272401  | 0.313629     | 0.049742373 |
| 5          | rs2962483     | 0.390681  | 0.348294     | 0.04977034  |
| 16         | SNP_A-2065089 | 0.062724  | 0.0878447    | 0.04977034  |
| 18         | rs7243428     | 0.200717  | 0.239182     | 0.04977034  |
| 3          | rs6414256     | 0.392473  | 0.349796     | 0.049798324 |
| 11         | rs1009240     | 0.480144  | 0.43539      | 0.049798324 |
| 15         | rs11857237    | 0.437276  | 0.393805     | 0.049798324 |
| 1          | rs10493888    | 0.204301  | 0.170412     | 0.049826324 |
| 1          | rs2494766     | 0.340502  | 0.299353     | 0.049826324 |
| 4          | rs3821936     | 0.129496  | 0.16189      | 0.049826324 |
| 5          | rs1875481     | 0.370036  | 0.414451     | 0.049826324 |
| 7          | rs2530132     | 0.247312  | 0.210858     | 0.049826324 |
| 11         | rs755851      | 0.322581  | 0.365588     | 0.049826324 |
| 14         | rs2810097     | 0.310036  | 0.269755     | 0.049826324 |
| 13         | rs4254165     | 0.286738  | 0.328625     | 0.049854341 |
| 20         | rs4815070     | 0.333935  | 0.377044     | 0.049854341 |
| 1          | rs1103168     | 0.374552  | 0.332595     | 0.049882375 |
| 1          | rs2576264     | 0.349462  | 0.393211     | 0.049882375 |
| 2          | rs705648      | 0.229391  | 0.269703     | 0.049882375 |
| 3          | rs7631640     | 0.102518  | 0.0785251    | 0.049882375 |
| 5          | rs387013      | 0.339928  | 0.299387     | 0.049882375 |
| 6          | rs2153140     | 0.339928  | 0.383214     | 0.049882375 |
| 7          | rs977201      | 0.16426   | 0.19983      | 0.049882375 |
| 11         | rs85074       | 0.335125  | 0.294238     | 0.049882375 |
| 11         | rs11020235    | 0.435252  | 0.479884     | 0.049882375 |
| 11         | rs16922406    | 0.0806452 | 0.108311     | 0.049882375 |
| 13         | rs9317351     | 0.249104  | 0.289249     | 0.049882375 |
| 19         | rs12608629    | 0.117329  | 0.0912496    | 0.049882375 |
| 2          | rs10496319    | 0.267986  | 0.309435     | 0.049910425 |
| 2          | rs12623832    | 0.28853   | 0.329813     | 0.049910425 |
| 2          | rs17770211    | 0.419355  | 0.375298     | 0.049910425 |
| 2          | rs10171368    | 0.266187  | 0.22842      | 0.049910425 |
| 7          | rs1477226     | 0.166667  | 0.135868     | 0.049910425 |
| 12         | rs10843180    | 0.365108  | 0.323509     | 0.049910425 |
| 14         | rs927382      | 0.402878  | 0.447647     | 0.049910425 |
| 14         | rs17095088    | 0.123188  | 0.155172     | 0.049910425 |
| 16         | rs9933246     | 0.399642  | 0.443952     | 0.049910425 |
| 1          | rs7513623     | 0.0913978 | 0.120613     | 0.049938492 |
| 1          | rs7551341     | 0.437276  | 0.481778     | 0.049938492 |
| 3          | rs11706167    | 0.0770609 | 0.104188     | 0.049938492 |
| 12         | rs11049678    | 0.365108  | 0.323439     | 0.049938492 |
| 12         | rs7955539     | 0.241935  | 0.205722     | 0.049938492 |
| 14         | rs10146912    | 0.333935  | 0.293045     | 0.049938492 |
| 17         | rs7212681     | 0.448029  | 0.493183     | 0.049938492 |
| 1          | rs273252      | 0.375451  | 0.332822     | 0.049966576 |
| 4          | rs2712692     | 0.417563  | 0.46184      | 0.049966576 |
| 5          | rs17052725    | 0.448029  | 0.49267      | 0.049966576 |
| 6          | rs9456003     | 0.397849  | 0.355465     | 0.049966576 |
| 8          | rs1440350     | 0.43705   | 0.393795     | 0.049966576 |

Table DS2: All SNPs tested for association (RDC SABP vs. controls) with the Cochran-Armitage trend test and significant at the p=0.05 threshold.

| chromosome | SNP        | MAF_cases | MAF_controls | p_value     |
|------------|------------|-----------|--------------|-------------|
| 11         | rs7120774  | 0.31295   | 0.272836     | 0.049966576 |
| 11         | rs10896137 | 0.172662  | 0.20849      | 0.049966576 |
| 13         | rs1023055  | 0.170863  | 0.139646     | 0.049966576 |
| 13         | rs655365   | 0.306452  | 0.26628      | 0.049966576 |
| 3          | rs9681374  | 0.0971223 | 0.0734242    | 0.049994676 |
| 5          | rs3733755  | 0.222222  | 0.261158     | 0.049994676 |
| 8          | rs11250163 | 0.44964   | 0.49471      | 0.049994676 |
| 8          | rs1354446  | 0.426523  | 0.471541     | 0.049994676 |
| 12         | rs4766691  | 0.234767  | 0.274506     | 0.049994676 |
| 13         | rs560295   | 0.33871   | 0.297818     | 0.049994676 |
| 14         | rs726041   | 0.42446   | 0.469123     | 0.049994676 |

Table DS3: Independent association signals at  $p < 10^{-4}$  for comparison of RDC SABP cases against controls

Independent is defined as linkage disequilibrium  $r^2 < 0.2$ . Physical location is given as base pair location on the chromosome according to genome build 126.  
 The p value is the significance of the lambda-corrected Cochran-Armitage trend test.  
 The supporting SNPs have  $p < 0.001$ , lie within 250kb and are in linkage disequilibrium at  $r^2 > 0.2$  with index SNP.

| Chromosome | SNP        | position (bp) | P_value  | TOTAL | NSIG | S05 | S01 | S001 | S0001 |    |
|------------|------------|---------------|----------|-------|------|-----|-----|------|-------|----|
| 21         | rs4818065  | 39959593      | 5.12E-07 | 1     | 0    | 0   | 0   | 0    | 0     | 1  |
| 3          | rs2352974  | 49865617      | 8.27E-07 | 11    | 0    | 3   | 4   | 3    |       | 1  |
| 15         | rs16942644 | 87413740      | 1.38E-06 | 3     | 0    | 0   | 0   | 1    |       | 2  |
| 4          | rs6414684  | 46909508      | 2.49E-06 | 5     | 2    | 1   | 0   | 0    |       | 2  |
| 5          | rs13154602 | 76431673      | 2.99E-06 | 4     | 0    | 0   | 0   | 2    |       | 2  |
| 13         | rs7990962  | 42297245      | 5.61E-06 | 6     | 1    | 1   | 0   | 3    |       | 1  |
| 2          | rs4027132  | 11988090      | 6.63E-06 | 1     | 0    | 1   | 0   | 0    |       | 0  |
| 4          | rs7680321  | 46986035      | 7.28E-06 | 11    | 7    | 1   | 0   | 0    |       | 3  |
| 6          | rs1171115  | 84286342      | 8.36E-06 | 18    | 0    | 1   | 11  | 2    |       | 4  |
| 7          | rs9692080  | 138831267     | 1.27E-05 | 5     | 0    | 2   | 0   | 2    |       | 1  |
| 7          | rs971992   | 20913583      | 1.30E-05 | 7     | 1    | 2   | 0   | 2    |       | 2  |
| 3          | rs6795255  | 13640927      | 1.41E-05 | 1     | 0    | 0   | 1   | 0    |       | 0  |
| 4          | rs4859809  | 78607832      | 2.05E-05 | 65    | 18   | 2   | 8   | 1    |       | 36 |
| 4          | rs4859809  |               |          |       |      |     |     |      |       |    |
| 7          | rs2869738  | 67931285      | 2.35E-05 | 1     | 0    | 0   | 0   | 1    |       | 0  |
| 2          | rs6748570  | 6024047       | 2.62E-05 | 4     | 1    | 1   | 1   | 0    |       | 1  |
| 15         | rs16961825 | 33923855      | 2.95E-05 | 1     | 0    | 0   | 0   | 1    |       | 0  |
| 9          | rs10982246 | 114329947     | 3.78E-05 | 4     | 0    | 1   | 0   | 3    |       | 0  |
| 4          | rs4697854  | 10839641      | 4.87E-05 | 0     | 0    | 0   | 0   | 0    |       | 0  |
| 3          | rs1522549  | 61787730      | 6.09E-05 | 3     | 0    | 0   | 0   | 3    |       | 0  |
| 22         | rs17435801 | 15690867      | 6.25E-05 | 7     | 2    | 1   | 1   | 3    |       | 0  |
| 2          | rs6750277  | 231705813     | 6.25E-05 | 12    | 0    | 5   | 0   | 4    |       | 3  |
| 12         | rs4764639  | 100031962     | 6.70E-05 | 9     | 5    | 0   | 2   | 0    |       | 2  |
| 18         | rs3760569  | 58390061      | 6.80E-05 | 7     | 1    | 2   | 1   | 3    |       | 0  |
| 4          | rs4298171  | 181172423     | 7.44E-05 | 13    | 5    | 1   | 3   | 3    |       | 1  |
| 9          | rs1073540  | 70059368      | 8.26E-05 | 20    | 12   | 4   | 2   | 2    |       | 0  |
| 6          | rs6570569  | 143981332     | 8.38E-05 | 12    | 0    | 1   | 5   | 6    |       | 0  |
| 3          | rs16827322 | 158433580     | 8.77E-05 | 25    | 7    | 1   | 3   | 14   |       | 0  |

| Chromosome | SNP        | SP2                                                                                                                                                                                                                                                               |
|------------|------------|-------------------------------------------------------------------------------------------------------------------------------------------------------------------------------------------------------------------------------------------------------------------|
| 21         | rs4818065  | rs734413                                                                                                                                                                                                                                                          |
| 3          | rs2352974  | rs9827708,rs9858542,rs11130214,rs2291542,rs3749237,rs2271961,rs17657688,rs7628058,rs2526747,rs2240327,rs7061                                                                                                                                                      |
| 15         | rs16942644 | rs12595660,rs11073831,rs11858077                                                                                                                                                                                                                                  |
| 4          | rs6414684  | rs3934674,rs4368579,rs6852985                                                                                                                                                                                                                                     |
| 5          | rs13154602 | rs3934500,rs13170206,rs4703727,rs6453278                                                                                                                                                                                                                          |
| 13         | rs7990962  | rs1323608,rs1535902,rs9562431,rs9567041,rs9594819                                                                                                                                                                                                                 |
| 2          | rs4027132  | rs2716620                                                                                                                                                                                                                                                         |
| 4          | rs7680321  | rs6447530,rs6447534,rs1442101,rs994447                                                                                                                                                                                                                            |
| 6          | rs1171115  | rs6917851,rs12191369,rs2152183,rs3798889,rs6903322,rs10943933,rs13196054,rs6454330,rs9449623,rs13207536,rs512140,rs798395,rs971215,rs9341963,rs3798867,rs217326,rs217303,rs217297                                                                                 |
| 7          | rs9692080  | rs12707449,rs10954656,rs4726715,rs2270163,rs12534299                                                                                                                                                                                                              |
| 7          | rs971992   | rs7800398,rs971993,rs971990,rs6962818,rs12673221,rs10274515                                                                                                                                                                                                       |
| 3          | rs6795255  | rs1562808                                                                                                                                                                                                                                                         |
| 4          | rs4859809  | rs4241612,rs4417998,rs1862359,rs10518169,rs2059102,rs2059103,rs2059104,rs2059105,rs2059106,rs4416501,rs4460017,rs2042229,rs17395298,rs2194126,rs10518170,rs4475169,rs10518171,rs4484325,rs4241616,rs2059107,rs4859480,rs17400392,rs1988614,rs10017165,rs10010146, |
| 4          | rs4859809  | rs9307260,rs4608831,rs2866045,rs4859481,rs888982,rs10012774,rs10034292,rs9991953,rs17397057,rs4859783,rs4859787,rs960507,rs17397262,rs4859790,rs2042231,rs2042233,rs4859488,rs4859489,rs752062,rs2194117,rs2194118,rs12645407                                     |
| 7          | rs2869738  | rs3113288                                                                                                                                                                                                                                                         |
| 2          | rs6748570  | rs7563310,rs10191817,rs10495532                                                                                                                                                                                                                                   |
| 15         | rs16961825 | rs7168742                                                                                                                                                                                                                                                         |
| 9          | rs10982246 | rs11787667,rs10982256,rs1535964,rs998548                                                                                                                                                                                                                          |
| 4          | rs4697854  | NONE                                                                                                                                                                                                                                                              |
| 3          | rs1522549  | rs11130855,rs11130857,rs11130858                                                                                                                                                                                                                                  |
| 22         | rs17435801 | rs16981741,rs175148,rs165670,rs2075120,rs738043                                                                                                                                                                                                                   |
| 2          | rs6750277  | rs3821002,rs7603762,rs13387608,rs17619398,rs2175149,rs2136477,rs4973362,rs1543061,rs10192428,rs4973370,rs4973371,rs6756666                                                                                                                                        |
| 12         | rs4764639  | rs905610,rs7298531,rs10860687,rs11110688                                                                                                                                                                                                                          |
| 18         | rs3760569  | rs1473980,rs2048793,rs3760570,rs7231250,rs1052315,rs654975                                                                                                                                                                                                        |
| 4          | rs4298171  | rs2168907,rs3955261,rs6832008,rs2383360,rs1458692,rs922029,rs1458696,rs7655585                                                                                                                                                                                    |
| 9          | rs1073540  | rs3015182,rs1927105,rs745852,rs3015213,rs2296772,rs17088840,rs1927117,rs7466920                                                                                                                                                                                   |
| 6          | rs6570569  | rs9403505,rs9376756,rs9390110,rs9321927,rs9386039,rs12216096,rs10484804,rs10457749,rs954349,rs9496707,rs17072830,rs6912373                                                                                                                                        |
| 3          | rs16827322 | rs6805781,rs6809003,rs10936063,rs10936066,rs6781682,rs7648599,rs13081038,rs10451916,rs9831830,rs7642179,rs1500925,rs9289980,rs924517,rs12633429,rs2874616,rs1403108,rs10936081,rs1522392                                                                          |
